# Supplementary material for: External signals regulate continuous transcriptional states in hematopoietic stem cells
Source: eLife. 2021 Dec 23;10:e66512. doi: 10.7554/eLife.66512 (PMC8700284; doi:10.7554/eLife.66512)
Supplement: Figure 1—source data 1. [file elife-66512-fig1-data1.xlsx]

## Sheet: README
For stacked bargraphs both absolute numbers of occurences (events on FACS, cells, genes) are provided
Proportions are recalculated in the document
All final numbers used in the graphs are hightlighed in yellow (see example below)
Example
different terminologies are used - dictionary
Treatment	equivalent to
control	ct,
indomethacin	indo
G-CSF	GCSF
dmPGE2	p2
Poly(I:C)	pIC
Cell type	equivalent to
HSC	LT
LSK
Condition
Replicate 1	Rep_1, Rep1
Replicate 2	Rep_2, Rep2
Sex
male	m
female	f

## Sheet: Fig1F-H
Figure 1 HSC proportions between different treatments and clusters
Cell numbers/treatment and cluster	GCSF	ct	dmPGE2	indo	pIC
Metabolism	1204	1865	83	1757	188
Quiescent	937	1981	24	1816	184
Activated	780	1556	108	1947	58
Interferon	21	40	0	58	316
Acute activation	0	0	261	1	0
Cell cycle	42	79	0	47	2
Sum	2984	5521	476	5626	748
Figure 1F: Proportion of Clusters per treatment
cells/clusters	GCSF	ct	dmPGE2	indo	pIC
Metabolism	0.403485	0.337801	0.17437	0.3123	0.251337
Quiescent	0.314008	0.358812	0.0504202	0.322787	0.245989
Activated	0.261394	0.281833	0.226891	0.346072	0.0775401
Interferon	0.00703753	0.00724506	0	0.0103093	0.42246
Acute activation	0	0	0.548319	0.000177746	0
Cell cycle	0.0140751	0.014309	0	0.00835407	0.0026738
Figure 1G: Proportion of treated cells per cluster (normalized to absolute numbers of cells/treatment)
cells/treatment	Metabolism	Quiescent	Activated	Interferon	Acute activation	Cell cycle
GCSF	0.272755	0.243037	0.218973	0.0157421	0	0.357127
ct	0.228353	0.277715	0.236094	0.0162063	0	0.363063
dmPGE2	0.117874	0.0390244	0.190069	0	0.999676	0
indo	0.211114	0.249832	0.289908	0.0230606	0.00032406	0.211968
pIC	0.169903	0.190392	0.0649562	0.944991	0	0.0678423
Formula for 1G (non-transposed)
cells/treatment	GCSF	ct	dmPGE2	indo	pIC
Metabolism	0.272755	0.228353	0.117874	0.211114	0.169903
Quiescent	0.243037	0.277715	0.0390244	0.249832	0.190392
Activated	0.218973	0.236094	0.190069	0.289908	0.0649562
Interferon	0.0157421	0.0162063	0	0.0230606	0.944991
Acute activation	0	0	0.999676	0.00032406	0
Cell cycle	0.357127	0.363063	0	0.211968	0.0678423
Figure 1H: p-values (hypergeometric test) for pairwise comparisons
	Metabolism	Quiescent	Activated	Interferon	Cell cycle
GCSF	8.22214e-49	1	1	1	1
pIC	1	1	2.76498e-06	1.04667e-144	1
indo	1	0.140355	2.7853e-05	1	1
dmPGE2	1	0.457299	7.26048e-17	1	1

## Sheet: Fig1-sup1C-F
Figure 1 -supplement 1C, Chimerism of transplant at 4 months
Analyzed Events
Sample:	Cell dose	Total donor	Total helper	Total recipient	Total number of live cells		Donor myeloid	Donor B-cells	Donor T-cells		Donor myeloid	Donor B-cells	Donor T-cells	Donor other	Rest		Donor total		Engrafted
180206_T26_5LT_008.fcs	5	140	5321	63987	69448		31	61	12		0.000446377	0.000878355	0.000172791	0.000518373	0.997984		0.0020159		0
180206_T26_5LT_004.fcs	5	153	6610	46836	53599		0	44	40		0	0.000820911	0.000746283	0.00128734	0.997145		0.00285453		0
180206_T26_5LT_002.fcs	5	186	2691	61268	64145		10	106	15		0.000155897	0.00165251	0.000233845	0.000857432	0.9971		0.00289968		1
180206_T26_5LT_003.fcs	5	23651	1954	36460	62065		5	10695	8389		8.05607e-05	0.172319	0.135165	0.0735036	0.618932		0.381068		2
180206_T26_5LT_005.fcs	5	30611	3028	41460	75099		3464	21272	2300		0.0461258	0.283253	0.0306262	0.0476038	0.592391		0.407609		3
180206_T26_5LT_006.fcs	5	29193	2178	39349	70720		8463	16424	1238		0.119669	0.23224	0.0175057	0.0433824	0.587203		0.412797		3
180206_T26_5LT_001.fcs	5	36219	3458	13621	53298		4083	22133	5525		0.076607	0.415269	0.103662	0.0840182	0.320444		0.679556		3
180206_T26_5LT_007.fcs	5	47289	740	7422	55451		10604	22587	6968		0.191232	0.407333	0.12566	0.128582	0.147193		0.852807		3
180206_T26_15LT_009.fcs	15	437	3782	70945	75164		114	303	0		0.00151668	0.00403119	0	0.000266085	0.994186		0.00581395		2
180206_T26_15LT_011.fcs	15	2266	4943	65803	73012		246	474	784		0.00336931	0.00649208	0.010738	0.0104366	0.968964		0.031036		3
180206_T26_15LT_010.fcs	15	14507	1660	45778	61945		9679	3575	174		0.156252	0.0577125	0.00280894	0.0174187	0.765808		0.234192		3
180206_T26_15LT_013.fcs	15	17190	4351	51846	73387		3036	10442	1865		0.0413697	0.142287	0.0254132	0.0251679	0.765762		0.234238		3
180206_T26_15LT_014.fcs	15	23425	3591	32169	59185		2606	17439	1391		0.0440314	0.294652	0.0235026	0.0336065	0.604207		0.395793		3
180206_T26_15LT_015.fcs	15	43285	5069	14837	63191		3665	22703	6861		0.0579988	0.359276	0.108576	0.159137	0.315013		0.684987		3
180206_T26_15LT_012.fcs	15	26655	257	9498	36410		12432	1090	8177		0.341445	0.0299368	0.224581	0.136116	0.267921		0.732079		3
180206_T26_50LT_022.fcs	50	31851	1576	41614	75041		8508	15476	3606		0.113378	0.206234	0.0480537	0.0567823	0.575552		0.424448		3
180206_T26_50LT_021.fcs	50	30726	1056	31208	62990		14114	8425	3563		0.224067	0.133751	0.0565645	0.0734085	0.512208		0.487792		3
180206_T26_50LT_017.fcs	50	41022	2786	15799	59607		7242	24841	3243		0.121496	0.416746	0.0544064	0.0955592	0.311792		0.688208		3
180206_T26_50LT_019.fcs	50	43680	2756	10634	57070		6221	28442	3379		0.109006	0.49837	0.059208	0.098791	0.234624		0.765376		3
Figure 1 -supplement 1D, Numbers used for ELDA
elda 0.1%
cell dose	number tested	positive	label
5	8	4	5 HSCs
15	7	6	15 HSCs
50	4	4	50 HSCs
Figure 1 -supplement 1E, proportion of HSCs and MPPs obtained from FACS for treatments and sex
Sorted Events (recorded between 1.1-1.7 MIO/sample)
Sample:	LSK	MPP3	MPP2	MPP1	HSC	MPP0
190515_pIC_female.fcs	25099	14841	1414	3002	579	5263
190515_pIC_male.fcs	37056	25072	1083	2501	458	7942
190515_p2_female.fcs	38526	22761	2162	5388	311	7904
190515_p2_male.fcs	50152	30087	1341	5251	449	13024
190517_indo_female.fcs	24299	14897	1035	2324	529	5514
190517_indo_male.fcs	24622	14798	631	1671	347	7175
190517_ct_female.fcs	19952	11452	846	2018	455	5181
190517_ct_male.fcs	34963	21834	915	2564	513	9137
190520_GCSF_female.fcs	22604	12547	1200	2623	631	5603
190520_GCSF_male.fcs	36554	23735	1050	2367	396	9006
% within LSK		MPP3/4	MPP2	MPP1	HSC	MPP0
190515_pIC_female.fcs		0.591298	0.0563369	0.119606	0.0230686	0.20969
190515_pIC_male.fcs		0.676598	0.029226	0.0674924	0.0123597	0.214324
190515_p2_female.fcs		0.590796	0.0561179	0.139854	0.00807247	0.20516
190515_p2_male.fcs		0.599916	0.0267387	0.104702	0.00895278	0.259691
190517_indo_female.fcs		0.61307	0.0425943	0.0956418	0.0217704	0.226923
190517_indo_male.fcs		0.601007	0.0256275	0.0678661	0.0140931	0.291406
190517_ct_female.fcs		0.573978	0.0424018	0.101143	0.0228047	0.259673
190517_ct_male.fcs		0.624489	0.0261705	0.0733347	0.0146727	0.261333
190520_GCSF_female.fcs		0.555079	0.0530879	0.116041	0.0279154	0.247876
190520_GCSF_male.fcs		0.649313	0.0287246	0.0647535	0.0108333	0.246375
Figure 1 -supplement 1F, proportion of HSCs and MPPs reassembled into the LSK compartment used for single cell analysis
number of cells	ct	indo	GCSF	dmPGE2	pIC
HSC	17	25	30	15	37
MPP0	237	404	433	451	480
MPP1	77	121	155	225	200
MPP2	28	40	58	72	78
MPP3/4	507	901	1026	1229	1345
sum	866	1491	1702	1992	2140
cells/sample	ct	indo	GCSF	dmPGE2	pIC
HSC	0.0196305	0.0167673	0.0176263	0.00753012	0.0172897
MPP0	0.273672	0.270959	0.254407	0.226406	0.224299
MPP1	0.0889145	0.0811536	0.0910693	0.112952	0.0934579
MPP2	0.0323326	0.0268276	0.0340776	0.0361446	0.0364486
MPP3/4	0.58545	0.604292	0.60282	0.616968	0.628505

## Sheet: Fig1-sup2C-D and G-H
Figure 1 -supplement 2C, Proportion of cells between HSC clusters for Replicate 1 and 2
number of cells	Rep_1	Rep_2
Quiescent	1185	2614
Activated	930	2196
Metabolism	244	493
Interferon	23	31
sum	2382	5334
cells/sample	Rep_1	Rep_2
Quiescent	0.497481	0.490064
Activated	0.390428	0.411699
Metabolism	0.102435	0.0924259
Interferon	0.00965575	0.00581177
Figure 1 -supplement 2D, p-values (hypergeometric test) for pairwise comparisons
	Quiescent_2	Activated_2	Metabolism_2	Interferon_2
Quiescent_1	1.76915e-37	1	1	7.11579e-09
Activated_1	1	1.09962e-135	1	1
Metabolism_1	1	1	2.76076e-92	1
Interferon_1	0.365839	0.0926761	1	2.17055e-102
Figure 1 -supplement 2G mean Activated score per HSC clusters and statistical tests for mean comparison
	mean	standard deviation
Metabolism	0.100597	0.081423
Quiescent	0.111757	0.065172
Activated	0.254339	0.069949
Interferon	0.179257	0.081748
Acute activation	0.207757	0.056005
Cell cycle	0.063532	0.092017
one-way ANOVA test: (statistic=2650.7213330329714, pvalue=0.0)
Tukey HSD, FWER=0.05
group1	group2	meandiff	p-adj	lower CI (95%)	upper CI (95%)	reject
Activated	Acute activation	-0.0466	0.001	-0.0598	-0.0334	TRUE
Activated	Cell cycle	-0.1908	0.001	-0.2071	-0.1746	TRUE
Activated	Interferon	-0.0751	0.001	-0.0855	-0.0646	TRUE
Activated	Metabolism	-0.1537	0.001	-0.158	-0.1495	TRUE
Activated	Quiescent	-0.1426	0.001	-0.1469	-0.1383	TRUE
Acute activation	Cell cycle	-0.1442	0.001	-0.1647	-0.1237	TRUE
Acute activation	Interferon	-0.0285	0.001	-0.0448	-0.0122	TRUE
Acute activation	Metabolism	-0.1072	0.001	-0.1203	-0.094	TRUE
Acute activation	Quiescent	-0.096	0.001	-0.1092	-0.0828	TRUE
Cell cycle	Interferon	0.1157	0.001	0.0969	0.1345	TRUE
Cell cycle	Metabolism	0.0371	0.001	0.0209	0.0533	TRUE
Cell cycle	Quiescent	0.0482	0.001	0.032	0.0644	TRUE
Interferon	Metabolism	-0.0787	0.001	-0.089	-0.0683	TRUE
Interferon	Quiescent	-0.0675	0.001	-0.0779	-0.0571	TRUE
Metabolism	Quiescent	0.0112	0.001	0.007	0.0153	TRUE
Figure 1 -supplement 2H, Proportion of cells between clusters of combination HSC/MPP1 for control and dmPGE2 treatments
number of cells	HSC_ct	MPP1_ct	HSC_dmPGE2	MPP1_dmPGE2
Primed	1	1024	1	24
Metabolism	1	574	0	15
Stem cell	474	44	33	11
Cell cycle-2	9	378	1	74
Cell cycle-1	6	314	0	77
Interferon	2	28	0	0
Acute activation	0	0	2	348
sum	493	2362	37	549
cells/sample	HSC_ct	MPP1_ct	HSC_dmPGE2	MPP1_dmPGE2
Primed	0.0020284	0.433531	0.027027	0.0437158
Metabolism	0.0020284	0.243014	0	0.0273224
Stem cell	0.96146	0.0186283	0.891892	0.0200364
Cell cycle-2	0.0182556	0.160034	0.027027	0.134791
Cell cycle-1	0.0121704	0.132938	0	0.140255
Interferon	0.0040568	0.0118544	0	0
Acute activation	0	0	0.0540541	0.63388

## Sheet: Fig1-sup3C-D
Figure 1 -supplement 3C, Proportion of cells between HSC clusters for male and female
number of cells	GCSF_f	ct_f	dmPGE2_f	indo_f	pIC_f	GCSF_m	ct_m	dmPGE2_m	indo_m	pIC_m
Metabolism	804	1051	6	853	106	400	814	77	904	82
Quiescent	625	1079	7	830	102	312	902	17	986	82
Activated	502	915	19	931	25	278	641	89	1016	33
Interferon	15	20	0	31	196	6	20	0	27	120
Acute activation	0	0	62	0	0	0	0	199	1	0
Cell cycle	30	50	0	20	1	12	29	0	27	1
sum	1976	3115	94	2665	430	1008	2406	382	2961	318
cells/sample	GCSF_f	ct_f	dmPGE2_f	indo_f	pIC_f	GCSF_m	ct_m	dmPGE2_m	indo_m	pIC_m
Metabolism	0.406883	0.3374	0.0638298	0.320075	0.246512	0.396825	0.338321	0.201571	0.305302	0.257862
Quiescent	0.316296	0.346388	0.0744681	0.311445	0.237209	0.309524	0.374896	0.0445026	0.332996	0.257862
Activated	0.254049	0.29374	0.202128	0.349343	0.0581395	0.275794	0.266417	0.232984	0.343127	0.103774
Interferon	0.00759109	0.00642055	0	0.0116323	0.455814	0.00595238	0.00831255	0	0.00911854	0.377358
Acute activation	0	0	0.659574	0	0	0	0	0.520942	0.000337724	0
Cell cycle	0.0151822	0.0160514	0	0.00750469	0.00232558	0.0119048	0.0120532	0	0.00911854	0.00314465
Figure 1 -supplement 3D, Proportion of cells between LSK clusters for male and female
number of cells	ct_f	indo_f	GCSF_f	dmPGE2_f	pIC_f	ct_m	indo_m	GCSF_m	dmPGE2_m	pIC_m
LSK-Primed	120	237	292	10	234	126	222	257	21	205
LSK-Metabolism	109	230	259	161	118	114	155	199	173	197
LSK-Primitive	144	222	258	57	102	93	166	162	83	144
LSK-Cell cycle	73	145	149	190	96	75	91	102	183	115
LSK-Acute activation	4	2	6	592	0	4	3	4	481	0
LSK-Interferon	2	9	3	1	400	0	4	1	0	313
LSK-Interferon cell-cycle	0	1	1	0	110	0	0	0	0	86
LSK-Myeloid	0	2	6	21	15	2	2	3	19	5
sum	223	381	423	861	723	174	266	272	766	663
cells/sample	ct_f	indo_f	GCSF_f	dmPGE2_f	pIC_f	ct_m	indo_m	GCSF_m	dmPGE2_m	pIC_m
LSK-Primed	0.538117	0.622047	0.690307	0.0116144	0.323651	0.724138	0.834586	0.944853	0.0274151	0.309201
LSK-Metabolism	0.488789	0.603675	0.612293	0.186992	0.163209	0.655172	0.582707	0.731618	0.225849	0.297134
LSK-Primitive	0.64574	0.582677	0.609929	0.0662021	0.141079	0.534483	0.62406	0.595588	0.108355	0.217195
LSK-Cell cycle	0.327354	0.380577	0.352246	0.220674	0.13278	0.431034	0.342105	0.375	0.238903	0.173454
LSK-Acute activation	0.0179372	0.00524934	0.0141844	0.687573	0	0.0229885	0.0112782	0.0147059	0.627937	0
LSK-Interferon	0.00896861	0.023622	0.0070922	0.00116144	0.55325	0	0.0150376	0.00367647	0	0.472097
LSK-Interferon cell-cycle	0	0.00262467	0.00236407	0	0.152144	0	0	0	0	0.129713
LSK-Myeloid	0	0.00524934	0.0141844	0.0243902	0.0207469	0.0114943	0.0075188	0.0110294	0.0248042	0.00754148
