# Supplementary material for: External signals regulate continuous transcriptional states in hematopoietic stem cells
Source: eLife. 2021 Dec 23;10:e66512. doi: 10.7554/eLife.66512 (PMC8700284; doi:10.7554/eLife.66512)
Supplement: Figure 2—source data 1. [file elife-66512-fig2-data1.xlsx]

## Sheet: README
For stacked bargraphs both absolute numbers of occurences (events on FACS, cells, genes) are provided
Proportions are recalculated in the document
All final numbers used in the graphs are hightlighed in yellow (see example below)
Example
different terminologies are used - dictionary
Treatment	equivalent to
control	ct,
indomethacin	indo
G-CSF	GCSF
dmPGE2	p2
Poly(I:C)	pIC
Cell type	equivalent to
HSC	LT
LSK
Condition
Replicate 1	Rep_1, Rep1
Replicate 2	Rep_2, Rep2
Sex
male	m
female	f

## Sheet: Fig2L
Figure 2L Fold change of Fos Mean fluorescent intensity beweeen indo and control for HSCs and LSKs
							fold change with ct = 1
Mean Fluorescent intensity	control	indo	control	indo			control	indo	control	indo		% reduction
	LSK	LSK	HSC	HSC			LSK	LSK	HSC	HSC		LSK	HSC
Repl1	5592	3022	5558	2680			1.28652	0.695256	1.38964	0.670067		0.304744	0.329933
	4692	3339	4231	3021			1.07946	0.768187	1.05786	0.755326		0.231813	0.244674
	4108	2734	3860	2372			0.945107	0.628997	0.965097	0.593059		0.371003	0.406941
	3678	2485	3370	2257			0.846179	0.571711	0.842584	0.564306		0.428289	0.435694
	3663	2676	2979	2405			0.842728	0.615654	0.744824	0.60131		0.384346	0.39869
Repl2	11441	5063	8613	4029			1.69657	0.750786	1.62601	0.760619		0.249214	0.239381
	7414	5171	5711	4156			1.09941	0.766801	1.07816	0.784595		0.233199	0.215405
	5772	4030	4689	3228			0.855923	0.597604	0.885218	0.609402		0.402396	0.390598
	4688	4216	3894	3534			0.695178	0.625185	0.735133	0.66717		0.374815	0.33283
	4403	3544	3578	3091			0.652915	0.525535	0.675477	0.583538		0.474465	0.416462
avg Repl1	4346.6	2851.2	3999.6	2547		average	1	0.654572	1	0.658939	avg % reduction	0.345428	0.341061	used in text for paper
avg Repl2	6743.6	4404.8	5297	3607.6		stdv	0.310744	0.085771	0.304216	0.0818984	stdv % reduction	0.085771	0.0818984
