# Supplementary material for: External signals regulate continuous transcriptional states in hematopoietic stem cells
Source: eLife. 2021 Dec 23;10:e66512. doi: 10.7554/eLife.66512 (PMC8700284; doi:10.7554/eLife.66512)
Supplement: Figure 3—source data 1. [file elife-66512-fig3-data1.xlsx]

## Sheet: README
For stacked bargraphs both absolute numbers of occurences (events on FACS, cells, genes) are provided
Proportions are recalculated in the document
All final numbers used in the graphs are hightlighed in yellow (see example below)
Example
different terminologies are used - dictionary
Treatment	equivalent to
control	ct,
indomethacin	indo
G-CSF	GCSF
dmPGE2	p2
Poly(I:C)	pIC
Cell type	equivalent to
HSC	LT
LSK
Condition
Replicate 1	Rep_1, Rep1
Replicate 2	Rep_2, Rep2
Sex
male	m
female	f

## Sheet: Fig3A,C,D and F
Figure 3A: p-values (hypergeometric test) for pairwise comparisons
	Quiescent	Activated	Metabolism	Cell cycle	Interferon	Acute activation
LSK-Primitive	6.59134e-66	3.69909e-41	1	1	0.0926761	0.0025384
LSK-Primed	5.10884e-45	1	0.849034	1	1	0.0025384
LSK-Metabolism	1	1	5.91079e-47	9.17663e-64	1	1
LSK-Cell cycle	1	0.849034	0.34921	2.23861e-84	1	1
LSK-Interferon cell cycle	0.34921	0.849034	1	2.38409e-23	1.63248e-138	0.849034
LSK-Interferon	0.0182159	0.34921	0.849034	1	7.88278e-192	0.849034
LSK-Acute activation	4.35629e-17	5.77381e-25	1	1	1	2.65646e-77
LSK-Myeloid	1	0.34921	0.0926761	1	0.849034	0.0926761
Figure 3 LSK cell proportions between different treatments and clusters
Cell numbers/treatment and cluster	ct	indo	GCSF	dmPGE2	pIC	Sum
LSK-Primed	246	459	549	31	439	1724
LSK-Metabolism	223	385	458	334	315	1715
LSK-Primitive	237	388	420	140	246	1431
LSK-Cell cycle	148	236	251	373	211	1219
LSK-Acute activation	8	5	10	1073	0	1096
LSK-Interferon	2	13	4	1	713	733
LSK-Interferon cell-cycle	0	1	1	0	196	198	reported in paper (small proportion of cells in myeloid cluster)
LSK-Myeloid	2	4	9	40	20	75	0.00915639
Sum	866	1491	1702	1992	2140	8191
Figure 3C: Proportion of Clusters per LSK treatment
cells/clusters	ct	indo	GCSF	dmPGE2	pIC
LSK-Primed	0.284065	0.307847	0.322562	0.0155622	0.20514
LSK-Metabolism	0.257506	0.258216	0.269095	0.167671	0.147196
LSK-Primitive	0.273672	0.260228	0.246769	0.0702811	0.114953
LSK-Cell cycle	0.170901	0.158283	0.147474	0.187249	0.0985981
LSK-Acute activation	0.00923788	0.00335345	0.00587544	0.538655	0
LSK-Interferon	0.00230947	0.00871898	0.00235018	0.000502008	0.333178
LSK-Interferon cell-cycle	0	0.000670691	0.000587544	0	0.0915888
LSK-Myeloid	0.00230947	0.00268276	0.0052879	0.0200803	0.00934579
Figure 3D: Proportion of treated LSK cells per cluster (normalized to absolute numbers of cells/treatment)
cells/treatment	LSK-Primed	LSK-Metabolism	LSK-Primitive	LSK-Cell cycle	LSK-Acute activation	LSK-Interferon	LSK-Interferon cell-cycle	LSK-Myeloid
ct	0.250238	0.234163	0.283333	0.224131	0.0165814	0.00665441	0	0.0581639
indo	0.271189	0.234809	0.269414	0.207583	0.00601925	0.0251225	0.00722361	0.0675653
GCSF	0.284151	0.244702	0.25548	0.193407	0.0105461	0.00677171	0.00632809	0.133175
dmPGE2	0.0137091	0.152472	0.0727621	0.245571	0.966853	0.00144647	0	0.505722
pIC	0.180712	0.133853	0.119011	0.129308	0	0.960005	0.986448	0.235373
Formula for 3D (non-transposed)
cells/clusters	ct	indo	GCSF	dmPGE2	pIC
LSK-Primed	0.250238	0.271189	0.284151	0.0137091	0.180712
LSK-Metabolism	0.234163	0.234809	0.244702	0.152472	0.133853
LSK-Primitive	0.283333	0.269414	0.25548	0.0727621	0.119011
LSK-Cell cycle	0.224131	0.207583	0.193407	0.245571	0.129308
LSK-Acute activation	0.0165814	0.00601925	0.0105461	0.966853	0
LSK-Interferon	0.00665441	0.0251225	0.00677171	0.00144647	0.960005
LSK-Interferon cell-cycle	0	0.00722361	0.00632809	0	0.986448
LSK-Myeloid	0.0581639	0.0675653	0.133175	0.505722	0.235373

## Sheet: Fig3-sup1F-H
Figure 3 -supplement 1, LSK cell proportions between different surface phenotypes and clusters
Cell numbers/surface marker and cluster	HSC	MPP0	MPP1	MPP2	MPP3/4	Sum
LSK-Primed	0	278	24	19	1403	1724
LSK-Metabolism	1	157	113	100	1344	1715
LSK-Primitive	109	859	383	27	53	1431
LSK-cell cycle	1	129	78	61	950	1219
LSK-Acute activation	0	342	95	22	637	1096
LSK-Interferon	13	226	73	19	402	733
LSK-Interferon cell cycle	0	13	12	7	166	198
LSK-Myeloid	0	1	0	21	53	75
Sum	124	2005	778	276	5008	8191
Figure 3 -supplement 1F: Proportion of Clusters per surface phenotype
cells/clusters	HSC	MPP0	MPP1	MPP2	MPP3/4
LSK-Primed	0	0.138653	0.0308483	0.0688406	0.280152
LSK-Metabolism	0.00806452	0.0783042	0.145244	0.362319	0.268371
LSK-Primitive	0.879032	0.428429	0.492288	0.0978261	0.0105831
LSK-cell cycle	0.00806452	0.0643392	0.100257	0.221014	0.189696
LSK-Acute activation	0	0.170574	0.122108	0.0797101	0.127196
LSK-Interferon	0.104839	0.112718	0.0938303	0.0688406	0.0802716
LSK-Interferon cell cycle	0	0.00648379	0.0154242	0.0253623	0.033147
LSK-Myeloid	0	0.000498753	0	0.076087	0.0105831
Figure 3 -supplement 1G: Proportion of surface phenotypes per cluster
cells/clusters	LSK-Primed	LSK-Metabolism	LSK-Primitive	LSK-cell cycle	LSK-Acute-Activation	LSK-Interferon	LSK-Interferon cell cycle	LSK-Myeloid
HSC	0	0.00058309	0.0761705	0.000820345	0	0.0177353	0	0
MPP0	0.161253	0.0915452	0.60028	0.105824	0.312044	0.308322	0.0656566	0.0133333
MPP1	0.0139211	0.0658892	0.267645	0.0639869	0.0866788	0.0995907	0.0606061	0
MPP2	0.0110209	0.058309	0.0188679	0.050041	0.020073	0.0259209	0.0353535	0.28
MPP3/4	0.813805	0.783673	0.037037	0.779327	0.581204	0.548431	0.838384	0.706667
Formula for Figure 3 - sup1G (non-transposed)
cells/clusters	HSC	MPP0	MPP1	MPP2	MPP3/4
LSK-Primed	0	0.161253	0.0139211	0.0110209	0.813805
LSK-Metabolism	0.00058309	0.0915452	0.0658892	0.058309	0.783673
LSK-Primitive	0.0761705	0.60028	0.267645	0.0188679	0.037037
LSK-cell cycle	0.000820345	0.105824	0.0639869	0.050041	0.779327
LSK-Acute activation	0	0.312044	0.0866788	0.020073	0.581204
LSK-Interferon	0.0177353	0.308322	0.0995907	0.0259209	0.548431
LSK-Interferon cell cycle	0	0.0656566	0.0606061	0.0353535	0.838384
LSK-Myeloid	0	0.0133333	0	0.28	0.706667
Figure 3-supplement 3H mean Quiescent score per LSK clusters and statistical tests for mean comparison
	mean	standard deviation
LSK-Primed	0.024769	0.066699
LSK-Metabolism	-0.076141	0.042085
LSK-Primitive	0.074827	0.076886
LSK-cell cycle	-0.026568	0.052426
LSK-Acute activation	0.003625	0.052599
LSK-Interferon	0.005681	0.06937
LSK-Interferon cell cycle	-0.041409	0.046299
LSK-Myeloid	-0.052059	0.045612
one-way ANOVA test: (statistic=805.5463388199988, pvalue=0.0)
Tukey HSD, FWER=0.05
group1	group2	meandiff	p-adj	lower CI (95%)	upper CI (95%)	reject
LSK-Acute activation	LSK-Cell cycle	-0.0302	0.001	-0.0378	-0.0226	TRUE
LSK-Acute activation	LSK-Interferon	0.0021	0.9	-0.0066	0.0108	FALSE
LSK-Acute activation	LSK-Interferon cell cycle	-0.045	0.001	-0.0591	-0.0309	TRUE
LSK-Acute activation	LSK-Metabolism	-0.0798	0.001	-0.0868	-0.0727	TRUE
LSK-Acute activation	LSK-Myeloid	-0.0557	0.001	-0.0775	-0.0339	TRUE
LSK-Acute activation	LSK-Primed	0.0211	0.001	0.0141	0.0282	TRUE
LSK-Acute activation	LSK-Primitive	0.0712	0.001	0.0639	0.0785	TRUE
LSK-Cell cycle	LSK-Interferon	0.0322	0.001	0.0237	0.0408	TRUE
LSK-Cell cycle	LSK-Interferon cell cycle	-0.0148	0.0283	-0.0288	-0.0009	TRUE
LSK-Cell cycle	LSK-Metabolism	-0.0496	0.001	-0.0564	-0.0427	TRUE
LSK-Cell cycle	LSK-Myeloid	-0.0255	0.0089	-0.0472	-0.0038	TRUE
LSK-Cell cycle	LSK-Primed	0.0513	0.001	0.0445	0.0582	TRUE
LSK-Cell cycle	LSK-Primitive	0.1014	0.001	0.0943	0.1085	TRUE
LSK-Interferon	LSK-Interferon cell cycle	-0.0471	0.001	-0.0617	-0.0325	TRUE
LSK-Interferon	LSK-Metabolism	-0.0818	0.001	-0.0899	-0.0738	TRUE
LSK-Interferon	LSK-Myeloid	-0.0577	0.001	-0.0799	-0.0356	TRUE
LSK-Interferon	LSK-Primed	0.0191	0.001	0.011	0.0271	TRUE
LSK-Interferon	LSK-Primitive	0.0691	0.001	0.0609	0.0774	TRUE
LSK-Interferon cell cycle	LSK-Metabolism	-0.0347	0.001	-0.0484	-0.021	TRUE
LSK-Interferon cell cycle	LSK-Myeloid	-0.0106	0.899	-0.0354	0.0141	FALSE
LSK-Interferon cell cycle	LSK-Primed	0.0662	0.001	0.0525	0.0799	TRUE
LSK-Interferon cell cycle	LSK-Primitive	0.1162	0.001	0.1024	0.1301	TRUE
LSK-Metabolism	LSK-Myeloid	0.0241	0.016	0.0026	0.0456	TRUE
LSK-Metabolism	LSK-Primed	0.1009	0.001	0.0947	0.1071	TRUE
LSK-Metabolism	LSK-Primitive	0.151	0.001	0.1444	0.1575	TRUE
LSK-Myeloid	LSK-Primed	0.0768	0.001	0.0553	0.0983	TRUE
LSK-Myeloid	LSK-Primitive	0.1269	0.001	0.1053	0.1485	TRUE
LSK-Primed	LSK-Primitive	0.0501	0.001	0.0435	0.0566	TRUE
