# Supplementary material for: External signals regulate continuous transcriptional states in hematopoietic stem cells
Source: eLife. 2021 Dec 23;10:e66512. doi: 10.7554/eLife.66512 (PMC8700284; doi:10.7554/eLife.66512)
Supplement: Supplementary file 1. — Sequencing metric output from cellranger. [file elife-66512-supp1.xlsx]

## Sheet: scRNAseq metrics
	Estimated Number of Cells	Mean Reads per Cell	Median Genes per Cell	Number of Reads	Valid Barcodes	Sequencing Saturation	Q30 Bases in Barcode	Q30 Bases in RNA Read	Q30 Bases in Sample Index	Q30 Bases in UMI	Reads Mapped to Genome	Reads Mapped Confidently to Genome	Reads Mapped Confidently to Intergenic Regions	Reads Mapped Confidently to Intronic Regions	Reads Mapped Confidently to Exonic Regions	Reads Mapped Confidently to Transcriptome	Reads Mapped Antisense to Gene	Fraction Reads in Cells	Total Genes Detected	Median UMI Counts per Cell
HSC_ct (Rep_2)	6111	24288	2600	148426390	0.982	0.402	0.955	0.913	0.937	0.953	0.958	0.926	0.035	0.237	0.654	0.626	0.011	0.909	17881	7533
HSC_dmPGE2	650	57958	3132	37672971	0.981	0.691	0.956	0.912	0.942	0.954	0.955	0.926	0.036	0.252	0.637	0.609	0.012	0.909	15308	10274
HSC_GCSF	3246	22752	2665	73854016	0.981	0.401	0.953	0.912	0.938	0.952	0.958	0.927	0.031	0.234	0.662	0.634	0.011	0.937	16882	7586
HSC_indo	5940	23152	2582	137526868	0.981	0.403	0.955	0.913	0.931	0.953	0.956	0.923	0.036	0.251	0.637	0.609	0.012	0.936	17863	7303
HSC_pIC	932	65272	3260	60833750	0.981	0.675	0.955	0.913	0.921	0.953	0.954	0.918	0.038	0.242	0.638	0.611	0.011	0.912	16033	11226
LSK_ct	5064	39132	3463	198165057	0.981	0.395	0.956	0.916	0.933	0.954	0.958	0.928	0.03	0.225	0.673	0.646	0.011	0.929	18293	11127
LSK_dmPGE2	6497	30166	3013	195992804	0.983	0.382	0.955	0.91	0.908	0.954	0.959	0.931	0.032	0.231	0.668	0.639	0.011	0.926	18518	9074
LSK_GCSF	5292	30325	3361	160484059	0.979	0.37	0.956	0.917	0.925	0.954	0.958	0.927	0.026	0.217	0.685	0.657	0.011	0.948	17850	10275
LSK_indo	4665	37408	3264	174511750	0.982	0.442	0.956	0.907	0.922	0.954	0.957	0.926	0.03	0.23	0.666	0.64	0.011	0.94	17975	10111
LSK_pIC	5035	47566	3593	239496540	0.981	0.466	0.956	0.915	0.933	0.955	0.959	0.925	0.032	0.231	0.662	0.637	0.01	0.933	18688	12152
Rep_1 HSC	2912	30309	1999	88262229	0.97	0.591	0.929	0.772	0.892	0.923	0.845	0.761	0.031	0.173	0.557	0.534	0.012	0.938	16458	5073
sum	46344
average		37120.7	2993.82
stdv		14307.8	479.558

## Sheet: scATAC metrics
celltype	annotated_cells	bc_q30_bases_fract	cellranger-atac_version	cells_detected	frac_cut_fragments_in_peaks	frac_fragments_nfr	frac_fragments_nfr_or_nuc	frac_fragments_nuc	frac_fragments_overlapping_peaks	frac_fragments_overlapping_targets	frac_mapped_confidently	frac_waste_chimeric	frac_waste_duplicate	frac_waste_lowmapq	frac_waste_mitochondrial	frac_waste_no_barcode	frac_waste_non_cell_barcode	frac_waste_overall_nondup	frac_waste_total	frac_waste_unmapped	median_fragments_per_cell	median_per_cell_unique_fragments_at_30000_RRPC	num_fragments	r1_q30_bases_fract	r2_q30_bases_fract	si_q30_bases_fract	total_usable_fragments	tss_enrichment_score
MPP	10020	0.910448	1.2.0	10020	0.742622	0.449155	0.826795	0.37764	0.761036	0.782526	0.634852	0.00105089	0.161506	0.0438392	0.000157865	0.306192	0.0301178	0.387791	0.549297	0.00643238	6067	5363.84	175054615	0.947678	0.945897	0.92014	78897698	10.8616
HSC	730	0.909969	1.2.0	730	0.714171	0.489636	0.813262	0.323627	0.742804	0.777188	0.588387	0.000951753	0.332964	0.0321779	0.000678552	0.340769	0.0930914	0.475141	0.808105	0.00747255	7834.5	3898.44	40128070	0.950515	0.948963	0.902759	7700378	12.5208
