# Supplementary material for: External signals regulate continuous transcriptional states in hematopoietic stem cells
Source: eLife. 2021 Dec 23;10:e66512. doi: 10.7554/eLife.66512 (PMC8700284; doi:10.7554/eLife.66512)
Supplement: Supplementary file 2. — Table summarizing number of differentially regulated genes within male and female HSCs and LSKs. Over-representation analysis odds ratio and p-value were calculated using a Fisher’s exact test. [file elife-66512-supp2.csv]

treatment	cell type	total female diff genes	total male diff genes	gene total_overlap	p-value	odds-ratio	prop unique female	prop unique female 1.2	prop unique female 1.5	prop unique male	prop unique male 1.2	prop unique male 1.5	overlap 1.2	overlap 1.5	male_up	female_up	opp_directionality
dmPGE2	HSC	300	1369	207	1.97E-111	16.35450558	0.31	0.053333333	0.01	0.848794741	0.204528853	0.011687363	169	67	0.019323671	0.188405797	0.004830918
dmPGE2	LSK	1604	1033	764	0	27.47843866	0.523690773	0.011221945	0	0.259438529	0.008712488	0	262	44	0.009162304	0.028795812	0.001308901
GCSF	HSC	3574	2961	2222	0	12.64754266	0.378287633	0.000559597	0	0.249577845	0.002364066	0.000337724	264	14	0.079657966	0.00990099	0.007650765
GCSF	LSK	2642	2120	1606	0	20.6410919	0.392127176	0.003028009	0	0.24245283	0.002830189	0	559	41	0.010585305	0.01120797	0.000622665
indo	HSC	471	423	156	4.29E-104	17.17938291	0.668789809	0.004246285	0	0.631205674	0	0	16	1	0.012820513	0.012820513	0.153846154
indo	LSK	24	15	6	4.79E-13	369.1481481	0.75	0.125	0	0.6	0.133333333	0	0	0	0	0	0
pIC	HSC	1055	846	544	0	30.46741229	0.48436019	0.015165877	0	0.356973995	0.057919622	0.001182033	267	57	0.049632353	0.023897059	0.001838235
pIC	LSK	616	601	282	7.54E-200	23.99273553	0.542207792	0.011363636	0	0.53078203	0.044925125	0.001663894	130	47	0.014184397	0.088652482	0.010638298
