# Supplementary material for: External signals regulate continuous transcriptional states in hematopoietic stem cells
Source: eLife. 2021 Dec 23;10:e66512. doi: 10.7554/eLife.66512 (PMC8700284; doi:10.7554/eLife.66512)
Supplement: Supplementary file 3. — Each tab contains a treatment vs. control comparison (16,16-dimethyl prostaglandin E2 [dmPGE2], Indo, poly(I:C), granulocyte colony-stimulating factor [G-CSF]). Each cluster was compared to its respective control cluster separated by sex. Log fold change and adjusted p-value from the Hurdle model are listed for genes with p-values < 0.01. [file elife-66512-supp3.xlsx]

## Sheet: dmPGE2
primerid	logFC_HSC_Metabolism_male	adj_p-value_HSC_Metabolism_male	logFC_HSC_Quiescent_male	adj_p-value_HSC_Quiescent_male	logFC_HSC_Activated_male	adj_p-value_HSC_Activated_male	logFC_HSC_Interferon_male	adj_p-value_HSC_Interferon_male	logFC_HSC_Acute-Activation_male	adj_p-value_HSC_Acute-Activation_male	logFC_HSC_Cell-cycle_male	adj_p-value_HSC_Cell-cycle_male	logFC_HSC_pooled_male	adj_p-value_HSC_pooled_male	logFC_LSK_Primed_male	adj_p-value_LSK_Primed_male	logFC_LSK_Metabolism_male	adj_p-value_LSK_Metabolism_male	logFC_LSK_Primitive_male	adj_p-value_LSK_Primitive_male	logFC_LSK_Cell-cycle_male	adj_p-value_LSK_Cell-cycle_male	logFC_LSK_Acute-Activation_male	adj_p-value_LSK_Acute-Activation_male	logFC_LSK_Interferon_male	adj_p-value_LSK_Interferon_male	logFC_LSK_Interferon cell-cycle_male	adj_p-value_LSK_Interferon cell-cycle_male	logFC_LSK_Myeloid_male	adj_p-value_LSK_Myeloid_male	logFC_LSK_pooled_male	adj_p-value_LSK_pooled_male	logFC_HSC_Metabolism_female	adj_p-value_HSC_Metabolism_female	logFC_HSC_Quiescent_female	adj_p-value_HSC_Quiescent_female	logFC_HSC_Activated_female	adj_p-value_HSC_Activated_female	logFC_HSC_Interferon_female	adj_p-value_HSC_Interferon_female	logFC_HSC_Acute-Activation_female	adj_p-value_HSC_Acute-Activation_female	logFC_HSC_Cell-cycle_female	adj_p-value_HSC_Cell-cycle_female	logFC_HSC_pooled_female	adj_p-value_HSC_pooled_female	logFC_LSK_Primed_female	adj_p-value_LSK_Primed_female	logFC_LSK_Metabolism_female
0610009B22Rik													-0.11901	3.05473e-08																	-0.09567	0.00127774													-0.13282	0.00559516			-0.20806
0610012G03Rik													-0.107056	0.00808414
0610030E20Rik																															-0.0894653	0.00278803
1110002L01Rik													-0.0465331	0.000141589																	-0.0404128	0.000554534
1110004E09Rik													-0.0620461	0.00471628
1110004F10Rik													0.0831287	0.00471212
1110008F13Rik													-0.23526	1.94369e-10
1110008L16Rik					-0.0545589	0.00655126
1110012L19Rik
1110019D14Rik
1110059G10Rik																																					-0.118107	0.000154439
1190005I06Rik													-0.0210551	0.00765229
1190007I07Rik													-0.12776	1.261e-07
1500009L16Rik													-0.093958	2.12026e-08																															-0.104652	0.00572294
1500011K16Rik																															-0.109168	8.2308e-05
1600002K03Rik
1600014C10Rik													-0.0460905	0.00140854
1700017B05Rik	0.298342	5.1189e-10			0.375591	4.48494e-09							0.324697	2.68835e-39			0.256143	1.2795e-07	0.304519	0.00398559	0.418565	6.38053e-07									0.36362	6.06744e-36													0.260347	6.02705e-07			0.220072
1700029J07Rik
1700109H08Rik
1700123O20Rik																																													-0.169013	0.00658388
1810011H11Rik
1810037I17Rik
1810043G02Rik																																					0.00643964	0.00631158
1810055G02Rik																															0.0510782	0.000114727
1810058I24Rik																															-0.109683	0.00130987
2010107E04Rik													0.156046	0.000450799
2010315B03Rik																																					0.24651	0.00951133
2210016L21Rik													-0.103477	0.00197006
2310001H17Rik
2310033P09Rik													-0.0840963	0.00745153																																			-0.244409
2310040G24Rik
2310061I04Rik													-0.0551861	0.00279783																															-0.097805	0.00285532
2410002F23Rik																																													0.208792	0.00329838
2410015M20Rik													-0.137614	2.55399e-06
2510002D24Rik																															-0.111801	0.000462397
2510017J16Rik
2510039O18Rik																																													0.16143	0.000898658
2610524H06Rik													-0.101972	0.000123821
2810001G20Rik
2810004N23Rik													-0.0936608	0.00557339																	-0.0924381	0.00262559
2810006K23Rik													-0.0780269	6.74185e-05
2810474O19Rik
2900026A02Rik													0.0626079	0.00534857																	0.0815463	0.000187666
2900060B14Rik																															-0.0309454	0.00411891
2900097C17Rik													0.129899	0.000379964
3110009E18Rik																															-0.0433498	0.00667047
3110062M04Rik																															-0.0799245	9.71449e-05													-0.109294	0.00953831
3830406C13Rik													-0.0863128	0.00251867
4632415L05Rik																															-0.0692467	0.000239249
4833407H14Rik													0.075857	2.97093e-06
4930430F08Rik													-0.047429	0.00801095
4930481A15Rik																															-0.0502913	0.00744536													-0.121833	0.00615402
4930519L02Rik													-0.0406968	6.54957e-06
4930555A03Rik
4931406P16Rik													0.115198	1.2533e-06
4932438A13Rik													0.115479	0.000158758
5033406O09Rik					-0.208139	0.00584708							-0.205293	7.0222e-12																	-0.109264	0.000129397
5430403G16Rik																															-0.0474854	0.00717383
5430427O19Rik																					-0.185433	0.00144405									-0.101862	1.01135e-06
5730455P16Rik
5930430L01Rik													-0.0334685	0.00881795
6330418K02Rik																					-0.103753	0.00920935									-0.052515	0.000127116
6330562C20Rik																															-0.0415092	0.00182137
9130008F23Rik					0.149546	0.00311911							0.0768075	7.38994e-05																							0.0225245	0.00213498
9530068E07Rik	0.290564	0.00048014			0.231	0.00202501							0.19319	1.76185e-10																	0.0966465	0.00997408
9530082P21Rik
9930012K11Rik																															-0.0359565	0.000208946
9930111J21Rik2													-0.063088	0.00228449			-0.127869	0.00425637													-0.138277	9.60304e-10
A430005L14Rik													-0.101411	7.02497e-06
A430046D13Rik													-0.0559439	0.000281985							-0.165279	0.000743723									-0.0843584	4.22715e-05
A630089N07Rik													-0.052483	0.000333461																	-0.0938795	1.41666e-05
AA467197																															0.0811418	2.35348e-08
AC149090.1													-0.12965	0.0049111			-0.440728	1.55099e-10			-0.291802	0.00213157									-0.311607	7.18654e-23																	-0.277035
AC160336.1	0.322393	0.000810484			0.314987	6.94551e-05							0.311928	3.26908e-17																															0.242107	0.0010359
AI467606													-0.0808797	0.00843477																	-0.148083	6.00384e-08
AI480526																															-0.058074	0.00909851
AI504432																	-0.140547	0.00907362													-0.0877287	0.000146463
AI854703			0.0215633	0.00160941
AI987944
AU020206													-0.0932704	0.000206282
AW112010																															-0.131145	0.000771538
AW146154													-0.0423754	0.00577308																	-0.0427944	0.00558142
AY036118													-0.0806502	0.000153329			-0.139177	0.00163365													-0.126753	1.33663e-10																	-0.205629
Abca2																															-0.0374629	0.000630276			0.215853	0.00540208
Abca5													0.04725	0.000650427
Abcb7					0.0458106	0.00711167
Abcc4																																															0.0815367	0.00810731
Abcf3
Abcg1
Abcg2
Abcg3													-0.0808773	0.000950895																								0.00406111							-0.170071	0.000491798
Abhd10																															-0.0649364	0.0029929
Abhd11													-0.0883112	0.000188231
Abhd14a													-0.0873056	0.00295773
Abhd14b
Abhd17b	0.409722	7.16383e-14			0.294198	1.19115e-11							0.267479	2.71611e-29			0.296322	2.17906e-06			0.501702	1.40106e-10									0.391329	1.7191e-31	0.355798	3.17167e-06			0.663528	2.54216e-14							0.363343	7.54748e-23	0.791687	0.000407502	0.359178
Abhd17c
Abhd4
Abhd6													-0.0322355	0.00339536
Abhd8
Ablim1	0.376486	1.2926e-17			0.26891	1.42045e-06							0.464342	1.91086e-72																	0.132826	5.6039e-06					0.39401	0.000996208							0.257973	1.55869e-10
Abr																	0.137303	0.000786698
Abracl													-0.21935	9.87835e-09																															-0.303687	5.54621e-05
Acaa2													-0.0827005	0.00635516
Acad12																																															0.162234	0.00152705
Acadl													-0.100493	0.00546092
Acads													-0.0952929	7.34081e-05
Acadsb													0.0631837	0.00996208
Acap1
Acat1													-0.109321	8.64803e-06
Acat2													-0.0554751	0.00938523
Acbd3													0.0772708	0.00615419
Acer2					0.16185	3.31996e-06							0.204268	1.23429e-32																															0.243846	3.2042e-16
Acly
Acot1													-0.102492	0.000109559
Acot13													-0.0829992	0.00146833
Acot2					0.16355	0.000716359
Acp1													-0.111942	0.00277588
Acsf3																															0.0527983	0.00246986
Acsl3
Acsl4													0.0637266	0.000148989
Actb																					-0.198338	0.000537775									-0.114017	1.30178e-06
Actg1					0.206836	0.00538813							0.179898	5.60164e-09																	0.137582	9.51804e-08
Actl6a													-0.0954985	0.00096539
Actn4
Actr2													0.128282	0.000210768
Actr6													-0.0477412	0.00460141
Acy1													-0.0305126	0.00175628
Ada													-0.0424148	0.00293612
Adam9
Adamts10																															-0.0775055	0.000951253
Adck2													0.0432631	0.00845688
Adgrg1
Adgrg3
Adgrl2													-0.0607814	0.007031
Adh5													-0.201794	3.34437e-07																															-0.30247	2.58343e-06
Adi1
Adipor1													0.16317	9.85875e-06																	0.105387	0.00344368
Ado
Adprhl2
Adprm
Adsl													-0.0735166	0.000156617																															-0.161053	0.00198069
Adssl1					0.0331039	0.00192533
Aebp2													0.0903253	0.00153036
Afap1l1													0.200233	1.37348e-08																															0.263576	0.000334743
Aff4													0.207843	2.18098e-10																	0.149532	2.34701e-07					0.558799	0.00196114							0.319226	2.35868e-06			0.188724
Agfg2																															-0.0647015	0.000267818
Ago1													0.0900905	0.00228449																	0.115868	6.45766e-05
Ago2	0.311148	8.15419e-06			0.356969	2.37377e-09							0.324463	1.99983e-29							0.323884	0.00029277									0.248551	6.01238e-16					0.444164	0.00285538							0.31636	1.30177e-07			0.186425
Ago3	0.202907	4.40025e-05	0.141616	1.87936e-06	0.239668	1.12863e-07							0.213917	1.05003e-23																	0.0852499	5.25872e-05					0.359117	0.00126388							0.180587	8.66691e-08
Ago4													0.059817	7.81577e-05
Agpat2																	0.27663	0.00123143													0.137908	1.83591e-05
Agpat4													0.113842	1.0852e-05
Ahdc1
Ahnak													0.13292	4.42961e-07																															0.185466	0.000527705
Ahr													0.139244	6.19176e-08																	0.054196	0.00326073
Ahsa1													-0.0833276	0.00273704
Ahsa2													-0.0785957	0.000847262
Aim2
Aimp2													-0.133537	4.88826e-13																	-0.126655	8.2308e-05													-0.178547	9.82182e-06			-0.20344
Aip													-0.110603	3.41772e-05																															-0.229428	0.00015533
Ak2													-0.218298	1.11189e-08
Ak6													-0.044459	0.00867855																	-0.0934167	0.00122013													-0.0997748	0.00671816
Akap10
Akap13	0.318115	6.19741e-08			0.434566	2.36498e-07							0.38416	1.09467e-30	0.499235	0.00384333	0.478492	5.22227e-13			0.41393	2.39076e-07									0.402255	1.89853e-36													0.301111	5.17504e-08			0.442396
Akap7					0.129877	0.00685327
Akap8
Akap8l					0.152075	0.00845811							0.0946288	0.00132446
Akip1													-0.0743649	5.09689e-08
Akirin1													0.0996141	6.48786e-05
Akirin2
Akr1a1
Akr1c13													-0.0976607	3.87957e-06
Akr7a5													-0.0662321	0.00165654
Akt2
Aktip
Alad													-0.126235	9.09133e-11
Alas1													-0.0544275	0.00126297							-0.149899	0.00808042									-0.0705114	0.00662507
Alcam													0.100824	0.000824804
Aldh18a1													-0.042028	0.00738239
Aldh1a1													-0.0882396	4.60041e-05
Aldh3a2			-0.0100918	0.000433052
Aldoa																															-0.0946485	0.00405024
Alg11
Alg2
Alg3
Alkbh1													0.0913519	0.0058512
Alkbh2													-0.0319605	0.00841234
Alkbh7													-0.0819489	9.56495e-07
Alyref																															0.103936	0.00845176
Ambra1													0.0257971	0.0049111
Amd2																															-0.0487284	0.00036267
Amdhd2													-0.0621457	0.000115138
Amfr													0.13184	3.76524e-06																	0.090982	0.00334607													0.26565	1.60221e-06
Amn1													0.0829225	3.64824e-05
Ampd2																																													-0.151756	0.00772169
Anapc1																																																	0.163585
Anapc10
Anapc11													-0.100629	0.00023394																																			-0.197758
Anapc4													-0.0739762	0.00239139																	-0.0857276	0.00116392
Angptl4																															-0.0616897	0.000482925					0.307419	1.9024e-13							0.0517822	6.88282e-14
Ankib1
Ankmy2													-0.0738571	0.000232409																	-0.0569145	0.0063342
Ankrd11					0.40595	3.9687e-06							0.274805	1.25301e-11			0.260125	0.00269378													0.235769	4.40859e-14																	0.268144
Ankrd12													0.164168	2.092e-05
Ankrd13a	0.377511	9.08941e-05											0.224756	4.46267e-08																	0.103285	0.00844429													0.215878	0.00285665
Ankrd24													-0.0713803	3.34801e-05
Ankrd26
Ankrd33b	0.163482	0.00161413			0.173119	0.000288752							0.15521	7.12421e-14							0.123748	0.00515585									0.0986692	5.52692e-09													0.13952	0.00253488
Ankrd54
Anks1	0.89857	3.30571e-42	0.718131	1.14592e-07	0.751764	5.28088e-32							0.841717	8.85917e-164			0.508985	2.04802e-17	0.536805	4.85977e-10	0.317436	1.12744e-06									0.412341	1.1999e-44			0.736899	0.0026185	0.797819	1.9024e-13							0.790308	4.25629e-59			0.405096
Anln																					-0.25095	0.00027792
Ano6													0.0744473	1.77843e-05
Anp32b													-0.199322	5.59034e-12																															-0.235173	5.38725e-05
Anp32e																																																	0.322618
Antxr2													0.0459252	0.00529094																	0.0450603	0.00266059
Anxa6													0.125979	9.09062e-06
Anxa7													0.133924	0.000652095
Ap1s1													-0.0981295	0.0042835
Ap2a2																	0.166075	0.0099312													0.160508	1.26622e-09
Ap2b1
Ap2s1													-0.225841	7.32081e-12
Ap3s1
Ap4m1																															-0.0866363	0.00326073
Ap4s1
Apaf1																																																	0.139051
Apbb2																															0.0556503	0.00126078
Apeh																																					-0.0912024	3.33948e-05
Apex1													-0.205105	5.80713e-10																															-0.237811	0.000453834
Apex2																															-0.0498033	0.00272627
Api5																																													0.209367	0.00170076			0.184547
Apip													-0.0943042	9.26144e-06
Aplp2																															0.125029	0.000396735													0.288813	9.82158e-05
Apobec1													-0.0567626	0.000254793
Apoe	-0.528596	7.29751e-05			-0.399192	0.000664336							-0.285613	2.36458e-08
Aprt													-0.179631	9.28897e-06
Arcn1													0.126624	7.81577e-05
Arf1																															0.0944479	0.00469475
Arf2													0.0568067	0.00282336
Arf3													0.0822853	0.000696667
Arf4
Arf6																															0.129719	1.10657e-05
Arfgef1													0.0927918	0.00166436
Arglu1													0.10525	8.77364e-05
Arhgap11a
Arhgap15	0.130422	0.00143108
Arhgap17																															-0.105902	0.00458486
Arhgap29																																					0.096408	3.71162e-08							0.0122572	0.000282488
Arhgap31													0.119389	0.00249023							0.176398	0.00187617									0.0989665	4.56431e-05
Arhgap32
Arhgap9													-0.0687904	0.00593535
Arhgdia
Arhgdib																																													-0.253275	0.00615402			-0.208987
Arhgef1													0.146562	1.63714e-05
Arhgef12													0.109276	0.000216419
Arhgef2													-0.125204	0.000719982
Arhgef3													-0.0677979	4.13197e-05
Arhgef39
Arid2					0.316149	2.09497e-06							0.122039	2.66391e-05
Arid4b													0.110875	0.00522397
Arid5a	0.239804	1.39698e-06			0.302635	1.90151e-06							0.206338	7.01574e-20			0.332037	1.2795e-07			0.488231	6.68107e-11									0.40142	2.01282e-34													0.168728	0.000210015			0.285332
Arih2	0.137054	0.00729065											0.130704	2.86067e-10																															0.154911	2.44899e-05
Arl1													0.1142	0.000345297
Arl11																															-0.093339	0.000115797
Arl15													0.05316	5.24824e-05
Arl16													-0.0465575	0.000439966
Arl2													-0.0829187	0.000693035																								0.00627119
Arl2bp													0.0986556	0.00325504
Arl4a					0.238347	0.000229482							0.2268	5.84458e-16																															0.245893	2.49795e-06
Arl4c													-0.042406	0.00625221
Arl5b													0.0646642	0.000440665
Arl6ip4													-0.0966979	0.00524326
Arl6ip5													0.109017	0.00585576
Armc5													0.0578696	0.000883252
Armcx1
Armcx2													0.0569567	0.00947071
Arnt													0.092431	7.29425e-05																	0.092823	0.000130143
Arntl																																																	-0.0723208
Arpc1a													0.114425	0.000169142
Arpc2					0.187368	0.000277887							0.177532	2.64301e-09
Arpc3	0.427346	1.2227e-14	0.620249	0.000308566	0.370858	1.88012e-07							0.570817	9.92495e-88			0.193268	0.00100749	0.357989	0.000153941	0.311807	3.96314e-08									0.295768	3.43618e-32	0.954617	3.91819e-05											0.557109	4.47724e-28			0.227147
Arpc4	0.353621	0.000741504											0.246706	1.22917e-10																															0.209713	0.000119086
Arpc5					0.337456	0.000576764							0.250704	2.0359e-10																	0.101392	0.00273201
Arpc5l																															-0.143444	0.000103055																	-0.165673
Arpp19
Arrb1													-0.0557035	0.00364126
Arrdc3													0.0929416	0.000675267																	0.13777	9.47812e-10
Arrdc4													0.154234	1.58631e-10																	0.0964472	9.65682e-06													0.22475	3.26013e-06
Art4													-0.145816	3.86168e-07																															-0.188521	0.000983793
As3mt													-0.10167	0.000162528																								0.000298834
Asah1	0.0583432	0.00262289			0.29507	0.000238685							0.179286	1.79711e-09																															0.187545	0.00305031			0.140227
Asna1													-0.0534703	0.00280824
Asph					0.296242	6.002e-07							0.208299	4.3123e-14																	0.0799492	0.00522622													0.252937	8.02922e-06
Aspm																					-0.384251	6.40591e-05									-0.0252378	0.00982723
Aspscr1													-0.0783336	0.000266151
Asrgl1													-0.102895	6.39242e-06
Asxl2
Atad1													0.0811309	0.00813375
Atad2	-0.135578	0.000238397											-0.101823	3.36989e-10																															-0.0872503	0.00428371
Atad5	-0.071528	5.68008e-06											-0.0538029	1.24278e-11																															-0.05553	0.00256493
Atat1																															-0.083054	0.000658168
Ate1													0.0712944	0.00933327
Atf2													0.0822671	0.00582196
Atf4																															0.137726	0.00103194
Atf7ip
Atg10																																	0.165499	0.00899981
Atg101	-0.160082	0.00385755											-0.154789	1.9959e-13																	-0.118653	7.98876e-05
Atg13
Atg16l1																															0.0748861	0.00550336
Atg2a													0.0876346	0.00131007
Atic													-0.150641	2.79313e-06																															-0.224139	0.000841194
Atl2													0.0539309	0.000990148
Atm																															-0.0800125	0.000478054
Atmin													0.0340406	0.00672753
Atn1													0.0841702	0.000220862
Atp13a2													-0.114057	0.000117705
Atp13a3													0.0865215	0.00551164
Atp1a1					0.16425	0.0099417							0.185592	7.93442e-08
Atp1b3																															0.180317	1.0275e-06
Atp23													-0.0964713	3.12285e-06																															-0.120878	0.00502632
Atp2a2													0.0860102	3.55329e-05																	0.144644	8.94865e-06													0.19935	0.00080639
Atp2b1													0.120316	0.000685767																															0.284611	2.85301e-05
Atp2b4																																																	0.245903
Atp5a1
Atp5b													-0.151613	1.17988e-08																															-0.18597	0.00267101
Atp5e
Atp5f1													-0.0551868	0.000478163
Atp5g1													-0.217446	1.15032e-12																															-0.346068	1.06239e-06
Atp5g2	-0.20908	0.00162771											-0.16395	9.45904e-11																															-0.163839	0.00296255
Atp5h													-0.197069	4.06525e-09																															-0.322527	3.44831e-07
Atp5j													-0.0972262	0.000907983																	-0.0998489	0.000944663
Atp5j2													-0.101816	0.00208067
Atp5k																	0.197579	0.000208749													0.172651	8.06489e-10													-0.237045	9.60522e-05
Atp5o-1					-0.282132	0.00991813							-0.311451	1.73937e-18																	-0.0891809	0.00251069													-0.313799	5.81877e-06			-0.230192
Atp6ap1													0.101564	0.000980548
Atp6ap2													0.124744	0.000490101
Atp6v0b
Atp6v1a													0.107993	0.000779023
Atpif1	-0.362798	0.00850946											-0.256764	1.21868e-14																															-0.484687	1.62833e-10
Atrx																																													-0.274865	0.00234418
Atxn10																															0.113957	0.00238078
Atxn1l
Atxn7					0.103836	0.00455359							0.106162	3.80955e-05
Atxn7l1					0.16106	0.00121105							0.118382	0.000139136
Auh													-0.0668232	0.0071729
Aurka																					-0.405976	2.26488e-07									-0.0513812	0.00101219
Aurkaip1													-0.174083	6.43908e-07
Aurkb
Auts2													0.0730651	0.000549317
Axin1	0.0854849	0.00227529											0.075527	0.0035926
B230118H07Rik																																													-0.13782	0.00764459
B230354K17Rik
B2m																															-0.0856407	0.000793653
B3galnt2
B3galt4																															-0.0466418	0.00260456
B3galt6													-0.0533184	0.00104749																	-0.0880089	4.13595e-06
B3gnt5	0.46002	6.92865e-21	0.366787	0.00066247	0.353716	1.03541e-12							0.315806	1.2441e-52	0.564649	9.41856e-05	0.438166	7.22127e-15	0.344283	9.64864e-05	0.426479	1.25644e-09									0.501296	3.28794e-60													0.233197	2.38666e-10			0.482685
B4galnt1													0.0802835	0.000521425
B4galt1													0.0834469	2.04776e-05
B4galt4																															0.0829055	0.000733974
B4galt5			0.0254241	0.00225088									0.0894156	1.89469e-09																	0.0608697	0.00212838													0.149249	3.9507e-07
B4gat1	-0.0869521	0.00255761
BC003965
BC035044																															-0.184361	5.86488e-08
BC037034																															-0.057727	0.00313795
BC147527																															-0.0449066	0.00046853																	-0.0502676
Bach1																																																	0.164913
Bach2
Bad													-0.0893595	2.99598e-05
Bag1													-0.0987068	0.000804446
Bag5
Bag6																															0.126866	9.47665e-06
Bahcc1
Bahd1													0.0437945	0.000698291
Baiap2																															0.0908148	0.000766042
Banf1													-0.167669	3.41846e-06																															-0.249807	0.000839516
Banp
Batf													-0.0924915	0.000118801
Baz1b													-0.197287	1.12562e-09
Baz2a													0.0723192	0.00379165
Baz2b													0.124011	0.00228857
Bbc3																																			0.158812	0.00210541
Bbs4
Bbx													0.14116	0.000467138																	0.113112	0.00446356
Bcas2
Bcat2													-0.0709297	0.00130974
Bcdin3d													-0.0629605	0.000469897
Bckdk													-0.112521	3.41691e-05
Bcl10	0.116422	0.00250653											0.16686	5.27758e-07							0.208462	0.00598354									0.156395	1.40108e-07
Bcl11a					-0.310262	0.00387692							-0.300519	5.70031e-12																	-0.201166	1.21184e-06													-0.378447	7.37819e-06			-0.265324
Bcl2																	-0.263524	0.000781889													-0.180939	2.59498e-07
Bcl2l11															0.575763	1.76299e-06	0.423485	2.0766e-15			0.828017	1.55543e-28									0.666267	2.92362e-91															0.559273	0.00432664	0.460489
Bcl2l12													-0.0722079	8.84823e-05																															-0.136673	0.00157435
Bcl3																					0.171461	5.26068e-07									0.124688	4.53992e-15																	0.108425
Bcl6
Bclaf1					0.233692	0.00465061							0.180101	5.88936e-05
Bclaf3													0.0668251	0.00758248
Bcr																															0.0846875	0.000170179
Bcs1l													-0.0845759	4.54766e-07																	-0.0974976	1.36626e-05
Bend4	0.182614	5.48528e-13			0.138874	0.000148751							0.142278	3.13704e-25			0.171365	0.000953536	0.214305	0.00942724	0.183752	0.000416762									0.21596	5.55049e-23					0.251946	0.000761013							0.128098	2.68252e-07
Bet1													-0.115473	0.00023245																															-0.196896	0.00125113
Bet1l													0.0976446	9.91957e-05
Bex3																															0.110859	0.0013803
Bex4
Bex6																	-0.332182	1.78011e-07			-0.366318	8.80445e-07									-0.302359	5.61534e-25																	-0.256253
Bgn																																	0.050076	0.00688814			0.150174	0.00893649
Bid													-0.0620881	0.000538708
Bin1
Bin2													-0.140232	0.00111003
Birc3													0.0961389	2.02394e-06																	0.09152	8.55063e-05
Birc5
Blm
Bloc1s4													0.0894058	0.0012545
Blvra													-0.0928081	1.9738e-06																															-0.126046	0.000218244
Bmpr2													0.153961	3.88142e-09																															0.164539	0.00183358
Bmyc																															-0.171303	1.91862e-08
Bnip2																					-0.280326	0.00251795									-0.100858	0.00913592
Bola1													-0.0951687	0.00198658																																			-0.217087
Bop1													-0.0533792	0.00288052
Bora																					-0.308163	0.000475796									-0.0844203	0.00389233
Borcs6																																													0.14376	0.00996468
Borcs8
Bphl													-0.0710171	0.00817529
Braf													0.0901865	0.000172883																	0.103582	1.88503e-05													0.14105	0.00547313
Brap					0.162404	0.000701161							0.119099	3.61968e-08
Brca2													-0.0575727	9.9073e-08
Brd4					0.155106	0.000625725							0.13152	0.00200498																	0.112931	0.000284744
Brd7													-0.112031	0.00030801
Brf1													0.0568425	0.00720437
Brip1os					-0.0157864	0.000427084
Brk1													-0.121256	0.0029074
Brms1l																															-0.0453726	0.00815696
Brpf1																																																	0.120223
Brwd1													0.0603864	0.000165143
Bsn																	-0.127077	0.00164428													-0.0652659	5.48351e-05
Bst2													-0.0965123	0.00628323
Btbd2													-0.0840324	1.02831e-05
Btbd7													0.0766728	0.00615419
Btd
Btf3l4													0.0615614	0.00381476
Btg1																															0.143457	0.000688534
Btg2													-0.1673	0.00687662
Btg3	0.366969	8.47469e-17			0.194313	0.000181711							0.235534	7.32498e-35			0.122286	0.00543152													0.139491	1.05161e-13													0.208726	9.51935e-09
Btk																																													-0.143083	0.00023344
Bub1
Bub3													-0.07654	0.000109671
Bud23													-0.0885684	0.000474708
Bzw2													-0.188038	5.07138e-08																															-0.227864	0.000758356
C030034L19Rik																															-0.0697232	0.000436382
C030037D09Rik
C1d													0.15874	4.57714e-06
C1galt1c1
C1qbp					-0.347764	0.000501982							-0.220976	4.64746e-09
C1qtnf12													-0.0924723	0.000164754
C1qtnf4													0.0790113	0.000524597
C1rl													-0.0757543	0.00073892																	-0.0410414	0.000223548
C330018D20Rik
C530008M17Rik													-0.0857718	0.000513684
C87436
C920006O11Rik																																													0.0911676	0.00610022
Cab39																															0.0973461	0.00725306
Cables1	0.235809	1.82632e-14			0.212227	1.00316e-06							0.253099	4.26568e-43	0.15729	0.00028946	0.309335	4.90417e-10	0.373546	3.54861e-05	0.313191	1.36518e-09									0.386319	1.55465e-51													0.331447	1.08625e-35	0.62923	4.14984e-09	0.330266
Cacnb2													0.0724564	0.00126317
Cactin																					-0.15272	0.00239747
Cacybp													-0.167993	2.16681e-06																															-0.180225	0.00148356
Cad													-0.0395007	0.00112049
Cadps2																																															0.0983197	0.00692545
Calcrl																															-0.113621	3.76662e-05
Calhm2													-0.0690866	1.03895e-06							-0.151467	0.00290191									-0.13429	1.98283e-12
Calm1													-0.0852088	0.00883901
Calm3													-0.125137	0.00312706
Calr	-0.287498	0.000414755			-0.207997	0.00208011							-0.264291	8.94932e-20
Calu																															0.0855143	0.00781805
Camk1d
Camk2a																																					0.0156755	0.000141006
Camk2d													0.106794	0.00180581
Camk2n1													0.120955	3.34789e-11																															0.115514	0.00150795
Caml
Camsap1																															-0.0475277	0.00781805
Canx
Capn1
Capn2													0.0685949	0.00334042
Capza1
Capza2					0.284575	0.000873936							0.166749	3.63544e-05
Car2													-0.37784	5.98809e-18																	-0.150406	0.00760874													-0.39723	5.74437e-07
Card19																															0.138834	0.000106036
Carf													0.0721219	5.41892e-05																															0.135369	0.000103934
Carnmt1													-0.097574	0.00028838																	-0.107612	0.00325774
Carns1
Cars2													-0.0698977	0.00208067
Casd1			0.262423	0.00371047
Casp1													-0.0750816	0.00224736																	-0.104987	0.000270211
Casp2													-0.0595152	0.00986272
Casp3																																													0.0251669	0.000385531
Casp8													-0.0985162	0.000913366																	-0.143669	0.000194535
Casp8ap2	-0.13996	0.00420371											-0.0736319	0.00298491
Cast													0.135275	2.51772e-05
Cat													0.121049	0.000404183
Cav2					0.171703	0.000161467							0.123167	4.33267e-08
Cavin2	-0.120939	0.00289665											-0.11376	3.38664e-09
Cavin3													-0.121409	9.95232e-05
Cbarp	0.203822	1.48891e-05											0.216018	1.88362e-31					0.181693	0.00188066	0.0517083	0.00749754									0.0530387	9.91882e-05													0.190463	3.79757e-10
Cbfa2t3													-0.394977	3.22953e-21																	-0.260547	1.56654e-12													-0.504936	3.02598e-11			-0.291497
Cbl													0.131387	3.06289e-05
Cblb													0.0912374	1.56055e-06																							0.289737	0.000128815							0.111987	0.000239993
Cbr1													-0.115602	0.000581248			-0.092011	0.00543123
Cbr4
Cbx1													-0.0806621	0.000165465
Cbx3
Cbx5	-0.205595	0.0096188											-0.149935	1.42974e-10
Cbx8																	-0.0625754	0.0029157													-0.0652025	6.71256e-06
Cby1													-0.0641481	8.10079e-06
Ccdc112													-0.099109	0.000573711																															-0.174459	0.00622691
Ccdc12
Ccdc127
Ccdc130													-0.0385689	0.00887212																																	0.0910194	0.000377185
Ccdc149																																			0.187375	0.000204009
Ccdc15																																			0.189099	0.00766866
Ccdc166	-0.0752082	0.00634828											-0.0389617	0.00340158
Ccdc167													-0.0608341	8.47367e-07																															-0.0745806	0.0044912
Ccdc173													-0.0400767	3.56404e-05
Ccdc186
Ccdc191													-0.0659877	0.00035542
Ccdc28b													-0.0781853	0.000383479																	-0.100715	0.00106252
Ccdc34													-0.116904	9.49127e-12
Ccdc51													-0.0292306	0.00338071
Ccdc61
Ccdc85b
Ccdc9													0.0844753	0.00338403
Ccl27a													0.10836	1.18882e-05
Ccl4															0.87258	0.000334588															0.245613	8.91749e-05
Ccl9
Ccna2
Ccnb1
Ccnb2
Ccnd1					-0.20013	0.00102412							-0.149443	1.79711e-09
Ccnd2																															-0.147124	0.000328736
Ccnf																					-0.288591	1.02221e-07									-0.061801	1.55297e-06
Ccnl2													0.137399	0.000295817
Ccnt1																					0.257669	0.00405534																							-0.00874261	0.00202839
Ccnt2
Ccrl2	0.15958	0.000184											0.0737529	0.00014202
Ccsap
Cct2
Cct3					-0.339721	0.00152802							-0.263289	1.05303e-12																															-0.316536	0.000869431
Cct4													-0.139695	7.82689e-05
Cct5					-0.405613	0.000107804							-0.311797	1.66437e-17
Cct8													-0.225246	3.11423e-07
Cd164
Cd180																															-0.0602185	0.000321563
Cd200r1													0.0562287	0.00942308
Cd27																															-0.147418	0.000231761																	-0.348296
Cd274																					0.123699	0.000925388									0.150676	5.89415e-10
Cd2ap													0.0925896	0.00115453
Cd320													-0.0753109	8.39079e-05
Cd34																																	-0.0140241	0.00367432
Cd37																			-0.271397	0.00135793											-0.147306	0.000392128
Cd38																																					0.175139	3.13772e-05							0.0428312	0.000493062
Cd3eap													-0.10166	2.67897e-05																	-0.117908	3.60064e-05													-0.152135	0.00124714
Cd47																															-0.145831	1.97267e-06
Cd48																															-0.177082	4.53503e-05																	-0.325131
Cd53					0.122147	0.00538595							0.104703	1.68628e-13
Cd68																					0.0237578	0.00702018
Cd79b													-0.097016	0.000518339																	-0.103592	0.000289016
Cd82													0.156003	1.12105e-07
Cd86													0.0468265	0.00320018																	0.0631594	0.000690299
Cd93																															0.11537	0.00252925
Cdadc1
Cdc123													-0.0734926	0.000125451																															-0.137555	0.00704635
Cdc16													-0.0803399	0.00383307
Cdc20													-0.0461144	2.13882e-07							-0.441011	0.00113599
Cdc25c
Cdc37l1													0.09562	0.00146026
Cdc42bpb													0.0449588	0.00179683
Cdc42ep3	-0.270225	2.39446e-06											-0.28883	3.10302e-30			-0.316778	3.26777e-08			-0.475693	1.50338e-10									-0.361956	5.92904e-39													-0.207766	0.000434579			-0.228875
Cdc42se1													0.182734	4.15889e-11																	0.0997909	0.00278803
Cdc42se2					0.219424	0.0091692
Cdc5l					-0.168163	0.00726053							-0.136277	4.01221e-05
Cdc6													-0.0314672	0.000217228
Cdc7													-0.0286445	3.61501e-06																															-0.044078	0.00623598
Cdca2																					-0.322556	0.000387029									-0.0871079	0.000453613
Cdca7	-0.366351	6.42321e-07			-0.181934	0.000483161							-0.289023	3.53807e-38																															-0.25873	5.8653e-08
Cdca7l													-0.168182	5.89364e-09																															-0.116992	0.00134609
Cdca8
Cdk1	-0.0733272	0.000389224											-0.0599567	2.85941e-12							-0.323012	1.41893e-05
Cdk11b					-0.36485	0.00225743							-0.174865	5.88936e-05
Cdk13	0.237567	0.00234053											0.161466	2.48012e-08
Cdk17	0.514492	3.51582e-21			0.364583	7.0279e-08							0.438113	1.18659e-53			0.240512	5.03157e-05	0.327602	0.00419082											0.216199	4.39091e-13					0.539294	0.00132643							0.342767	5.77615e-11			0.227103
Cdk19													0.0677471	0.00254706
Cdk20																																																	-0.0280258
Cdk2ap1													0.0792132	0.00775278			-0.382408	7.16851e-07			-0.304785	0.000550219									-0.258107	7.70049e-16																	-0.348985
Cdk2ap2	-0.25719	0.00240122											-0.201324	3.75835e-12																															-0.208062	0.00300072
Cdk4	-0.401923	0.000666822											-0.329978	4.76541e-21																															-0.310845	1.12192e-05
Cdk5rap3													-0.107104	5.18819e-05
Cdk6
Cdkn1a	0.391655	1.92993e-08	0.946712	3.02321e-12	0.448055	5.87115e-06							0.562697	9.55398e-58	0.508885	0.00022828	0.807881	3.87412e-30	0.410936	0.000249845	1.12025	1.56429e-27									0.855569	2.7208e-102			0.63124	0.00649289									0.312011	3.74859e-06	0.550658	0.00801218	0.803898
Cdkn1c													0.149654	0.0010201
Cdkn2aipnl
Cdkn2d	0.325459	2.07618e-05	0.555659	0.000268251	0.317891	9.48082e-06							0.281191	7.48471e-23																	0.119967	0.00267314													0.169363	0.00324499			0.165204
Cdkn3																					-0.365282	0.00236562
Cdpf1													-0.0678117	7.34477e-05
Cds2													0.0688614	0.000234828
Cdt1	-0.106614	3.51027e-09											-0.0641931	1.43793e-18
Cdv3													0.125581	0.00227114
Cebpb	2.13192	1.72738e-127	1.95306	2.17325e-48	1.88448	4.99146e-96							2.02209	0	1.36108	1.4156e-20	1.2984	6.62751e-63	1.74769	2.9901e-47	1.80443	1.20325e-61									1.62016	2.05955e-253			1.01267	0.000777177	1.3056	4.6065e-14							1.53531	6.0625e-110	1.28336	5.00093e-12	1.01628
Cebpg													-0.0829732	0.000554819																	-0.136351	1.64515e-07
Cebpz
Cela1													-0.052139	0.00102261
Celf1													0.07504	0.00119123
Celf2					0.304611	0.000337985							0.299972	1.08599e-16																															0.191828	0.0012674
Cenpa													0.0470693	0.000855612			0.187266	0.000159164													0.261728	1.70512e-10																	0.23823
Cenpb													0.159745	0.000129585
Cenpe																					-0.344758	0.00520371
Cenpf																					-0.408292	0.00115278
Cenpk	-0.0490712	0.0051011											-0.0411963	1.98316e-10
Cenpl													-0.0293441	0.0087881							-0.293168	3.32334e-06									-0.0672101	9.57819e-05
Cenpm	-0.0518819	0.000504409											-0.0400781	3.24354e-15
Cenpp
Cenps													-0.0403867	3.44327e-13
Cenpu													-0.0248328	0.00190691
Cenpv													-0.115438	1.07583e-08
Cenpx	-0.216242	0.00635338											-0.205882	1.22749e-10																	-0.120144	0.000819535													-0.270162	0.000220724
Cep128
Cep19					-0.143933	0.000606894							-0.122693	3.45316e-11																	-0.084751	0.000831978													-0.135474	0.00172569
Cep57													-0.0922648	0.0010568
Cep57l1													-0.115704	6.22073e-07																	-0.105022	0.00160889
Cep70
Cep83					0.17214	0.00111695							0.101728	0.000144853
Cept1													-0.0729568	0.00222193																	-0.0698534	0.00949983
Cerk													0.0667615	0.00276354
Cers2	0.284088	0.00208968			0.227876	0.00442743							0.370151	3.52932e-29																	0.147044	2.06109e-06													0.307827	3.55982e-09			0.20932
Cfap20
Cfap97
Cfl1													-0.103562	0.000681757
Cfl2													0.159121	7.56281e-06
Cflar																															-0.0964925	0.00201
Chaf1a	-0.0639964	0.0003046											-0.0413226	5.55535e-10																															-0.0529881	0.000341141
Chaf1b	-0.190481	0.00418047											-0.200012	2.81577e-16
Chchd1													-0.17854	5.67739e-08																															-0.130157	0.002651
Chchd10					-0.191556	0.00572984							-0.127444	1.94644e-05
Chchd2																	-0.223874	2.18516e-07			-0.183983	0.00123637									-0.154945	5.81406e-11																	-0.188386
Chchd4													-0.0708964	0.00552894																	-0.107356	0.00185239
Chchd6													-0.0733786	0.00170557
Chchd7													-0.117502	0.00029047
Chd1													0.149662	3.3534e-07
Chd3os													-0.0389388	5.19451e-05
Chd4
Chd7	0.209216	3.82047e-05			0.21437	3.0849e-06							0.310729	3.98708e-41																							0.376035	0.000441153							0.31878	4.91685e-14
Chd9																															-0.163119	1.3692e-06
Chek1
Chek2													-0.0541663	7.70637e-06
Chfr
Chka	0.176935	0.000214554											0.113595	3.07196e-06			0.212774	0.000575415			0.231249	0.00084589									0.181151	1.86613e-09
Chkb													0.0784505	0.000587696
Chmp4b	0.245737	0.00048014			0.333517	8.68452e-05							0.283621	4.34834e-16																															0.264272	0.00053059
Chmp5
Chordc1													-0.0774405	0.00844577																															-0.187932	4.48876e-05
Chp1													0.132757	8.59815e-08
Chrnb1													0.0802738	9.59622e-05
Chst11																															0.0621825	0.00225204
Chst12													-0.0938941	6.47677e-05
Chst2													-0.0445882	0.00135569
Chst7													-0.0357994	0.0056669
Ciao1																															-0.0629617	0.00396694
Ciapin1													-0.0491623	0.00549591
Cib1													-0.0824542	0.000142443
Cinp													-0.0394723	0.00232379																															-0.0862052	0.00937706
Cirbp	0.555791	1.32034e-13			0.54656	2.23485e-15							0.645963	1.80537e-88			0.433758	6.99381e-11	0.409248	9.39672e-05	0.532846	2.01031e-09									0.428829	1.15709e-42	0.798745	0.00899981	0.854767	0.00373113	0.62962	4.47124e-05							0.842624	1.67509e-52			0.812537
Cisd1													-0.172008	1.87819e-13																															-0.198118	0.000134907			-0.168256
Cisd2													0.17053	2.19956e-07																															0.216932	0.00402712
Cish	0.581896	2.72744e-16	0.60923	7.48319e-05	0.515676	5.3405e-12							0.541119	6.39959e-62			0.23622	3.45302e-09	0.47916	1.46179e-07	0.276111	4.6223e-07									0.299741	1.32367e-34													0.254378	0.000891982			0.218646
Cit
Cited2	-0.499918	1.10911e-08	-0.740996	0.00503159	-0.407083	0.000137301							-0.535399	4.79782e-40			-0.25722	0.000233906													-0.297615	3.75176e-15					-0.611643	0.00448388							-0.621746	1.12471e-14
Ckap2
Ckap2l
Ckap4																	-0.213427	0.00180096													-0.110843	0.000601021
Ckap5
Cklf													-0.0704318	0.00316952			-0.221844	0.00033763													-0.128715	1.01461e-06
Cks1b	-0.172014	0.00582857											-0.170451	6.36739e-21																															-0.200787	5.58684e-06
Cks2													-0.113737	1.16394e-13							-0.41071	3.85995e-10
Clasp1													0.0294016	0.00872036
Clca3a1																																					0.164646	6.43189e-07							0.0595717	0.00381498
Clcf1																					0.173661	0.00045393									0.0753923	0.000107063
Clcn3													0.130767	1.30369e-05																															0.237607	1.28764e-05
Clcn4					0.171114	0.00888829
Clcn5													0.0518523	2.92189e-05																							-0.00290407	0.000101476
Cldn5													0.107496	1.05228e-05
Clec12a
Clec1a													0.142027	5.16807e-08																															0.271227	7.67783e-05
Clec2d	-0.563614	1.8195e-11											-0.521062	6.21904e-46			-0.205793	1.85269e-05			-0.229366	0.000197472									-0.321658	6.07203e-32		0.00560235											-0.622405	1.71284e-19			-0.27733
Clec4d																															0.0768637	6.77111e-06
Clec4e																															0.0785239	0.000887715																	0.186802
Clic4																																					0.243441	0.00113054
Clint1													0.15714	2.8859e-05
Clip1													0.103675	0.000945825
Clk1													0.221448	1.57116e-07			0.28454	0.000392034			0.389894	7.31719e-09									0.216031	1.40928e-10																	0.257295
Clk3			0.0228888	0.00122707
Cln6													-0.0713804	0.00768263
Cln8																																					0.00413221	2.41171e-05
Clpp													-0.121416	0.00010035
Clta																															-0.121226	1.58071e-05
Cltc	0.245288	0.000278139											0.257848	9.06756e-19																															0.268734	5.47371e-05			0.171742
Clu					-0.101324	0.00545621							-0.0505324	0.00724992
Cluap1													-0.101938	2.00728e-08																	-0.0715878	0.00375342
Cmas					0.204953	0.00546558
Cmc2													-0.0907453	1.63222e-09
Cmip	0.238237	4.73398e-05			0.197658	0.00104022							0.224895	2.21663e-20																	0.11323	4.09451e-05													0.265212	1.67659e-07			0.161941
Cmpk2
Cmtm6													0.113271	6.99539e-05
Cmtm7													-0.405521	6.23495e-19					-0.378294	0.000496628	-0.195151	0.00148621									-0.204456	1.9903e-13													-0.41811	2.36704e-06			-0.204065
Cnbp	0.261113	3.41872e-05			0.340354	2.25456e-07							0.256594	1.09027e-19			0.190666	9.1679e-06			0.249024	6.40153e-05									0.233659	4.35595e-20													0.291376	7.05738e-08			0.246777
Cnep1r1																															-0.0868608	0.000109773
Cnih4													-0.12445	1.37562e-06
Cnn3																															0.148086	1.55558e-06
Cnnm2																	0.0883916	0.00462465			0.130731	0.00854753									0.117515	4.8627e-14																	0.123287
Cnot1																																																	0.265651
Cnot10																																																	0.170885
Cnot2
Cnot4																															-0.116955	0.000188648
Cnot7													0.117447	0.000517839
Cnp													-0.100577	0.000107958
Cnpy2	-0.413227	3.89373e-05			-0.357493	0.000114842							-0.325557	1.78546e-19																	-0.214763	2.06152e-12													-0.412698	4.31539e-09
Coa3	-0.326616	0.000194378											-0.295574	3.12844e-22																	-0.140388	4.11577e-05													-0.255946	0.000145827
Coa4													-0.0678521	3.4957e-07																	-0.0680657	6.27395e-06													-0.0862897	0.00229474
Coa6	-0.141216	0.00413688											-0.130414	7.51939e-12																	-0.0928819	0.000189372													-0.142594	0.000221285
Coa7													-0.0529218	0.00293612
Cog4
Cog6													0.0689205	0.00136311
Cog8													-0.0869978	0.000191871																	-0.0956868	0.000357876													-0.142743	0.00329838			-0.180136
Col4a1													0.0645249	0.00869279																							0.301682	0.000201864							0.125709	0.00213338
Col4a2													0.0665617	0.00976985
Commd1													-0.102138	0.000294297
Commd2
Commd3													-0.241388	3.20243e-14																															-0.234774	0.000461699			-0.21887
Commd6
Commd7
Commd9													-0.0972404	1.03344e-07																	-0.0772652	0.00131183
Comt													-0.115068	0.000626884
Comtd1													-0.0701572	0.00038381																	-0.101852	0.000123787
Copa
Copb1													0.0976681	0.00989468
Coprs													-0.0371612	0.00125306
Cops3													-0.131485	9.02326e-06
Cops5													-0.0978265	0.00170007
Cops6													-0.120135	5.17343e-05
Cops7a																															-0.0987057	0.0023638
Coq10b																					0.286503	0.000629909									0.164488	1.43613e-07
Coq5
Coq8a													-0.105202	0.00429997
Coq8b																																																	-0.087125
Coq9			-0.12341	0.000873607
Coro1a													-0.168835	3.9804e-05																															-0.429923	3.30377e-09
Coro1c																															0.0882699	0.00884819
Coro7
Cotl1																																					0.137635	5.04727e-05
Cox14													-0.135147	0.00316195
Cox18													-0.0433503	0.000318226
Cox19													-0.0751106	0.00128223																															-0.163348	0.00024429
Cox4i1													-0.136175	6.94843e-07
Cox4i2													-0.0439164	0.00316195
Cox5a													-0.13483	1.31536e-10																															-0.212303	9.97788e-05
Cox5b													-0.103961	0.000677546
Cox6a1													-0.106007	0.00336409
Cox7a2l																															-0.154113	9.00129e-08
Cox7b	-0.393646	0.00175548											-0.292425	1.90846e-13																															-0.274222	0.00342715
Cox7c	0.231446	0.0096188											0.112283	0.00826783
Cox8a
Cpne2													-0.172373	6.43908e-07
Cpox													-0.0676625	0.000840186																															-0.110065	0.00516725
Cpsf7																															0.0815418	0.00257584
Cptp
Creb1					-0.11545	0.00168478							-0.0795114	0.000772558																	-0.109098	0.000771538
Creb3
Crebbp													0.132134	0.000229207
Crebzf
Creg1													-0.147195	6.56221e-07																	-0.189362	3.42046e-08
Crem	0.244048	2.81153e-14			0.337141	2.11198e-14							0.349279	1.04703e-77			0.124717	0.000546954	0.268592	0.00492309	0.19882	0.000109664									0.208858	8.12302e-26	0.695252	3.17167e-06			0.304451	0.000130107							0.297324	2.0334e-22			0.168537
Crim1					0.0990146	0.00573284							0.14047	9.76247e-11
Crip1													-0.115679	0.00675097
Crk													0.119351	4.96723e-06
Crlf3																															-0.142124	0.000141821
Crnkl1
Crtc3													0.148131	3.71659e-07
Cryzl2
Csde1													0.169337	2.39289e-05																															0.236647	0.00274467
Csgalnact2
Csnk1a1													0.150864	2.91631e-06																	0.114408	0.000783594					0.470429	0.00873144							0.322627	2.02921e-06
Csnk1e													0.19697	4.89405e-08																	0.120631	0.000767204
Csnk1g2													0.141756	0.000532457
Csnk1g3																																													0.163635	0.00210298
Csnk2a1	0.189067	0.0024326			0.233796	0.000982781							0.164107	1.92825e-08
Csnk2b													-0.111507	0.000164892
Cspp1
Csrnp1													0.127746	4.7183e-06																															0.197061	0.000932776
Csrp1													-0.117132	8.22186e-05
Cst3													-0.0829624	0.000818887
Ctbp1
Ctc1													-0.0552229	0.00256459
Ctla2a	1.76663	2.35277e-68	0.743693	0.00239823	1.16386	2.06859e-29							1.37451	7.16956e-183	0.980364	2.24861e-11	1.06577	6.14199e-45	1.03538	1.37442e-16	0.982353	5.54642e-37									1.14916	4.97676e-201	1.52245	0.000502023	1.53636	0.000496676	0.92194	0.000982505							1.2591	8.82103e-49	0.89807	0.000801648	0.970501
Ctla2b	0.3416	2.11017e-14			0.286209	1.01621e-08							0.309258	5.02725e-46			0.127096	0.000234124			0.131065	0.00142928									0.183425	3.10323e-20													0.147595	7.80549e-08
Ctnnb1													0.0804221	0.00926055																							0.327424	0.00620832
Ctnnbl1													-0.0217191	0.00234298																	0.0920207	0.0083559
Ctr9																															-0.105494	0.000766808
Ctsb													0.13242	0.00188796
Ctsg
Ctsh													0.0890725	0.00921968
Ctsl													0.155297	0.000123988																							0.414799	0.000652013							0.312654	3.01718e-07
Ctsz													-0.149137	2.51341e-05
Cuedc2													-0.145438	0.000200017																															-0.240195	0.00281452
Cul3													0.113408	0.00460258
Cuta													-0.186727	2.38751e-08																															-0.215035	0.0004246
Cutc													-0.06864	0.000736375
Cwc25	0.119048	0.00721705											0.092161	6.28943e-05
Cwc27					0.0400031	0.0082219
Cwf19l2																																													0.0892076	0.000213115
Cx3cl1													0.0518559	0.000760823
Cxcr4																															0.0927394	0.00183482
Cyb561d2													-0.0528228	0.00935402
Cyb5a	0.0949229	0.000673951											0.0918632	1.13416e-10
Cyc1													-0.0969699	0.00820098
Cyfip2													0.102916	0.00523323																	0.180494	2.9923e-09
Cyp26b1													0.0848319	0.00241991																															0.166577	0.000624759
Cyth1	0.161479	0.00282423											0.134201	2.2885e-11																	0.149095	1.03066e-09													0.15577	0.000114727			0.169921
Cyth2																															-0.0957848	0.0008981
Cyth3													0.109515	9.65767e-07
Cytip	0.752129	3.06481e-34	0.588973	4.63688e-06	0.777682	6.57925e-36							0.648417	4.31218e-108	0.777703	1.94446e-14	0.68745	4.47987e-27	0.677531	5.74203e-13	0.917958	2.57164e-31									0.846696	3.005e-136	0.779631	0.0092278			0.511048	2.31943e-07							0.547264	4.29186e-32	0.661878	1.56261e-13	0.68682
Cyyr1																																													0.0828539	0.00440817
D030056L22Rik													-0.121937	1.15353e-09							-0.344265	3.60416e-06									-0.120188	1.27275e-05													-0.126152	0.00829455			-0.184568
D11Wsu47e
D16Ertd472e																															-0.102619	0.00393697
D3Ertd254e					0.0668709	0.00515691
D5Ertd605e
D630045J12Rik
D6Wsu163e													-0.0402729	0.00177361
D8Ertd738e													0.289144	4.77764e-14							0.290082	4.46682e-06									0.270272	7.05821e-21
Dab2ip													-0.0387879	0.00312706
Dapp1					-0.3653	0.000427375							-0.479965	1.01715e-31																	-0.253029	4.585e-12													-0.540118	1.63225e-12			-0.271875
Dars2													-0.0353299	0.0031197
Dazap1													0.104046	0.00265061																	0.106566	0.00454212
Dazap2	0.331697	0.000177173			0.481754	7.65252e-09							0.400833	1.77338e-29							0.348332	0.000895592									0.193303	3.04009e-11													0.431102	3.4989e-12
Dbi													-0.223144	3.26894e-11
Dbp													-0.060754	0.00838463
Dcaf10													0.049757	0.0082913
Dcaf7																															0.0986209	0.00253756
Dck			0.091866	0.00267295									-0.0318458	0.00460258
Dcps													-0.140491	1.43535e-06
Dctd													-0.132242	2.27481e-07
Dctpp1	-0.401175	2.74731e-09			-0.20089	0.0047537							-0.341504	2.70116e-41																															-0.281364	4.68959e-06
Dcun1d1																															-0.189918	1.94235e-08
Dcun1d2													-0.0361031	0.00657559
Ddah2
Ddb1																															0.112942	0.00506331
Ddhd1													0.0542049	0.00557339
Ddit4	0.617452	8.31472e-26	0.534351	2.13338e-05	0.621145	2.76722e-17							0.574341	1.90104e-82	0.460946	1.16212e-05	0.290117	2.0766e-15	0.46019	6.20449e-07	0.454231	1.52736e-15									0.390278	3.74304e-52													0.484347	3.39902e-19			0.210448
Ddost													-0.20564	2.61546e-10
Ddt																															-0.0918784	0.00134092
Ddx1
Ddx17
Ddx20
Ddx21
Ddx24																															0.143997	0.000101827
Ddx39													-0.0217755	0.00065421
Ddx39b													-0.249453	1.3484e-09																															-0.284783	0.00214876
Ddx3x													0.139866	0.00112992																																			0.293962
Ddx3y	0.291646	0.000509299			0.240815	0.00581081							0.303063	4.47818e-21																	0.102906	0.00537879
Ddx46
Ddx5													0.0917692	0.00525849																																			0.150905
Ddx50													0.152818	0.000223035																	0.1031	0.00218214													0.35085	3.88503e-07
Ddx51													-0.0469116	0.000589951
Ddx56													-0.0838818	8.60474e-05
Ddx6					0.259494	0.000937056							0.245762	6.83897e-12																															0.372543	4.18912e-08
Dek													-0.0447022	0.00235769
Dennd1b													0.0802744	0.00907545
Dennd1c													0.150558	3.66465e-08																															0.178373	0.000654492
Dennd3	0.10953	0.000498933											0.0786793	2.70687e-08
Dennd4a	0.998669	2.2678e-46	1.02665	2.47378e-12	1.05104	2.65557e-47							1.06604	6.07612e-175			0.336183	8.24414e-11	0.616559	5.83005e-09	0.534125	3.96671e-11									0.509801	2.19939e-55													0.581186	2.48381e-18	0.54329	0.000912665	0.292993
Dennd5a													0.117391	4.19486e-05																	0.110183	0.00124921
Dennd6a
Deptor													0.0755419	0.00027664
Derl1
Derl2																															-0.0806453	0.00565455
Desi1
Desi2																																															0.335261	0.00220705
Dgat1	0.123195	1.46366e-07											0.184802	2.25385e-25			0.115074	0.00727295													0.127642	1.05983e-10													0.238959	7.96187e-15	0.108452	0.00278537
Dgcr6													-0.124585	2.67633e-05
Dgkd																															0.0852012	0.00133828																	0.139464
Dgke
Dgkg
Dguok													-0.163227	8.42595e-05																	-0.139203	5.11177e-05													-0.272732	0.000848209			-0.285361
Dhfr	-0.100933	5.76277e-09											-0.0732143	4.53461e-15																															-0.0702328	0.000849253
Dhrs11													0.0914052	0.000216018							0.123291	0.00610782									0.0955552	6.45751e-07													0.171269	0.00127605
Dhrs13													-0.0400447	0.000192102
Dhrs3	0.146019	0.000498061											0.118504	4.80939e-13																	0.140649	8.42662e-05													0.118078	0.000311611
Dhrs4													-0.100785	9.27341e-06
Dhrs7													0.0891779	0.000353024
Dhrs7b
Dhx38
Dhx40													0.0865526	8.103e-11			0.0605086	0.00263236													0.084325	7.05644e-09					0.307216	0.000930797							0.147511	2.72008e-07
Diaph1													0.14882	5.58166e-07
Diaph2													0.0549672	0.00568281
Diaph3
Dip2b																															0.0802749	0.00287004
Dkc1													-0.219101	2.89027e-10																															-0.279632	3.0338e-06
Dld					0.330266	1.16152e-06							0.156835	5.08858e-07
Dleu7
Dlg1													0.0671388	0.00460258
Dlgap4
Dlgap5
Dmac1
Dmwd			0.0765129	0.00187757									0.104106	4.978e-06																	0.0790269	0.000554897													0.187457	2.28815e-05
Dna2													-0.0356608	2.19103e-06
Dnaja1
Dnaja3
Dnajb1																																													-0.205481	0.00691849	0.438163	0.00425142
Dnajb6	0.291714	7.26493e-06											0.24587	2.35948e-16																	0.148632	5.40133e-07													0.230606	0.00394889			0.238787
Dnajb9
Dnajc10									-1.14658	0.00765826
Dnajc12													0.059399	0.0043258
Dnajc15													-0.120536	1.35213e-05																															-0.160999	0.00185657
Dnajc17													-0.0392437	0.00195722
Dnajc5													0.105957	4.97737e-05
Dnajc6
Dnajc9	-0.232359	2.05867e-05											-0.157251	5.15935e-15																															-0.141695	8.17511e-06
Dnase2a																															-0.119937	0.000227345
Dnlz																															-0.0451839	0.00254484
Dnmt1	-0.248538	1.20617e-06											-0.194734	1.09145e-23
Dnph1													-0.131419	8.49086e-18																															-0.159916	7.17524e-06
Dock10
Dock5																																					0.0698114	0.000996208
Dock8					-0.0190149	0.00415682
Dohh																															-0.101156	0.00224588
Dok1	0.200834	0.00161413											0.256649	6.29424e-21
Dopey2													0.0438458	0.00531872
Dph2													-0.0353897	0.000369478																	-0.0424287	0.00337075
Dph3													0.12713	4.8553e-05
Dpm1																																													0.249513	0.000206033
Dpp3													-0.0761191	0.00402664
Dpp7													-0.0274669	0.00982502
Dpp8													0.0793574	0.000977058
Dpy30													-0.165069	1.14771e-08
Drg1													-0.121129	1.07114e-05
Dscr3																																													-0.0945599	0.00564132
Dtl					-0.125779	0.00888829							-0.159658	2.69034e-16							0.385385	7.70581e-05																							-0.13027	0.0029762
Dtx3													0.139227	3.1081e-05
Dtx3l													-0.0791784	0.00169427
Dtymk													-0.126324	5.01069e-06
Dus2					-0.137898	0.00512847							-0.0796373	5.23227e-05
Dus3l																																			0.170022	0.00386984
Dusp1													0.148035	0.00783591			0.442796	0.000147642			0.505841	0.000186292									0.41228	6.18353e-17																	0.321757
Dusp12																																																	-0.132467
Dusp16																																													0.0943492	0.00588583
Dusp2	0.990922	6.69601e-20	1.01223	0.000179787	0.587279	6.41067e-07							1.0466	8.94087e-91																	0.222842	5.81583e-06													0.822759	7.31998e-17
Dusp3																																													0.117745	0.00691806
Dusp5													0.171567	1.30355e-10			0.188894	0.000441112			0.386219	3.26955e-06									0.209306	3.7841e-12													0.164516	0.000333826			0.182151
Dusp7																															-0.0553914	0.000303668
Dut	-0.454965	1.93105e-13			-0.241814	0.0033372							-0.386847	6.09554e-47																															-0.261074	1.44478e-09
Dvl2													-0.04839	0.00418821
Dvl3													0.042149	0.00942084
Dync1h1													0.13126	9.5019e-05
Dync1li1	0.1133	0.00816902											0.103688	8.49002e-08
Dync2h1
Dynll1	-0.26259	0.00985919											-0.320853	7.8661e-22																															-0.612218	1.49118e-20			-0.363867
Dynlt1a
Dynlt1f																					0.241043	0.00495194									0.109127	0.00443696																	0.186829
Dynlt3	0.249737	0.00434035											0.229922	4.42979e-11
Dyrk1a													0.0758827	0.00165319
Dyrk3	0.544981	8.69837e-21	0.541646	3.91522e-14	0.585278	6.9033e-16							0.52236	5.17467e-75					0.302753	0.00926243													0.559264	0.00899981											0.460999	2.45945e-18
E030030I06Rik
E230032D23Rik
E2f1	-0.0720575	9.90655e-05											-0.0428131	2.3239e-11																															-0.0503037	0.00850131
E2f3													-0.0520817	0.000333593
E2f5
E2f6													-0.0702752	0.00118386
Eaf1																																					0.0116572	0.00633427
Ebi3													0.138617	2.79277e-05
Ebna1bp2													-0.2113	5.63718e-10																															-0.267143	3.53819e-05
Ebp													-0.0955392	6.40815e-05																	-0.112273	0.00175057																	-0.2537
Ebpl													-0.101935	0.00403008
Ech1													-0.095289	0.00470594
Eci1													-0.179299	3.4217e-09																	-0.0865025	0.00736304													-0.217716	0.000694128
Ecm1													-0.0291772	0.0064695
Ecscr
Edf1													-0.177381	1.06368e-07
Eed													-0.0963483	9.3075e-06
Eef1a1													0.0619343	1.31772e-07
Eef1akmt1													-0.0991807	3.39974e-06
Eef1akmt4
Eef1b2	-0.269098	2.98967e-13			-0.273905	2.74121e-10							-0.232959	5.04788e-39			-0.109398	0.00307016													-0.0982391	7.2748e-09					-0.361557	7.63833e-05							-0.240656	4.31724e-13
Eef1d													-0.0869182	0.00547798																	-0.142452	2.32931e-08
Eef1g	-0.368609	4.35508e-11	-0.477372	0.00225088	-0.303969	6.008e-06							-0.327583	2.53207e-38																	-0.103766	0.000133397													-0.374382	5.68338e-14
Eef2													0.194954	3.52079e-21																	0.111602	2.72451e-07													0.222549	5.3662e-08
Eef2k													-0.153494	7.53786e-06																	-0.185729	4.81694e-08
Eef2kmt													-0.0942449	4.9026e-05
Efhd2					0.208723	0.000644692							0.179849	1.02278e-12							0.194025	0.00141979									0.12927	3.26782e-05
Efna1													-0.0641046	1.33414e-07
Eftud2																															0.120238	0.00116382																	0.211508
Egfl7					0.28642	3.54594e-05							0.303695	3.81944e-28																	0.154199	0.000191034													0.322477	2.99054e-08
Egln1
Egln3	0.225591	3.26811e-11			0.396955	4.48193e-15							0.256615	1.76627e-42																	0.147265	5.04489e-11													0.191869	9.38741e-10
Egr1	-0.138595	0.00548538											-0.177943	1.69768e-05
Eif1	0.336668	5.48528e-13	0.459536	0.000651485	0.26103	1.17261e-08							0.37519	8.07542e-71			0.233446	4.67474e-10	0.266982	0.000406142	0.300391	1.18503e-13									0.294473	1.24606e-52													0.301149	1.06202e-13			0.145132
Eif2a													0.113504	0.00278284
Eif2ak2													-0.0875915	0.00295508
Eif2b3													-0.0589822	0.00491522
Eif2b4													-0.050124	0.0046259
Eif2b5
Eif2d					0.123038	0.000286274							0.0732128	8.15824e-06
Eif2s1													-0.112468	0.000530501																																			-0.236961
Eif2s3y													0.171076	4.77025e-06
Eif3c																																																	0.278311
Eif3d													-0.152102	4.7229e-05
Eif3f
Eif3g													-0.117991	0.00035354
Eif3h
Eif3i					-0.270404	0.00703721							-0.183013	5.42869e-07																	-0.0805199	0.00749338
Eif3j1	0.290747	0.00029228
Eif3k
Eif4a1													-0.106267	0.00600159					-0.276576	0.00375409																									-0.252862	3.36767e-05
Eif4a2
Eif4b													0.0734816	0.00236497
Eif4ebp2													0.0908879	0.0073956
Eif4g2	0.307225	3.79817e-06											0.206226	1.98252e-10
Eif5					-0.380239	0.000642956							-0.212369	5.96179e-06																	-0.264997	2.65207e-16
Eif5a													-0.112229	0.00300288
Eif6													-0.142069	6.15649e-06
Elf1													0.203633	2.79853e-06
Ell2	0.196324	4.52746e-07			0.1219	0.00140595							0.179043	1.15518e-21																	0.0920929	2.11303e-07													0.155638	3.35016e-05			0.0576869
Elmsan1	0.174544	1.56763e-09			0.246762	1.07548e-07							0.275817	2.73757e-41																	0.125507	8.44711e-10													0.190866	5.74437e-07
Eloa
Elob																															-0.0893109	0.000438523
Elof1	-0.237554	0.00135563			-0.222352	0.00112913							-0.230716	3.59939e-19			-0.136981	0.0048343													-0.117416	5.35782e-07													-0.289794	7.59713e-08
Elovl1													-0.117549	7.01654e-06																	-0.0805707	0.00616409
Elovl5	0.107318	0.00698738			0.169151	6.85703e-05							0.153128	6.53963e-19																	0.19956	1.65177e-15													0.141477	2.45459e-05			0.213558
Elp3													-0.0185961	0.00929487
Elp4
Elp6													-0.0120906	0.00646279
Emb	0.413754	3.06766e-10	0.452279	0.00160023	0.259118	0.000603468							0.354876	3.2897e-36					0.394256	0.00134235	0.442225	0.00228842									0.387617	7.40742e-21													0.308273	1.38368e-07
Emc7																															0.125957	0.000362243
Emc8													-0.0818228	0.00402321																	-0.117759	0.000710313
Emc9													-0.0314403	0.00850765
Emcn
Emd					0.318117	0.000963228							0.216173	6.02261e-09																	0.142579	6.79408e-06
Emg1													-0.151789	3.31401e-05
Emilin1													-0.0758235	0.00327977
Eml5													0.0522748	0.000845344																															0.119064	8.26112e-06
Emp3	-0.446106	8.10175e-05											-0.354369	1.34134e-19																	-0.106482	0.00144424													-0.286212	0.000110654
Enah													0.0348161	0.00239267
Engase
Eno1																	0.192749	7.73777e-06			0.267663	0.00155337									0.205631	3.92337e-12
Enpp4													0.0742402	0.00409647
Ensa	0.299721	0.00110101											0.160933	5.54273e-06																	0.121983	0.00071681
Entpd1																																					0.0754205	2.50515e-08
Epb41					0.448819	1.59087e-09							0.319352	2.91607e-25																							0.353658	3.56357e-05							0.303256	6.868e-12
Epb41l4aos													0.193112	6.98701e-07
Epor													-0.021831	0.00786375
Eral1																																															0.0841926	0.00414779
Ercc5													0.115576	3.31608e-09							0.148651	0.00476882									0.0815296	1.00591e-05													0.12043	0.00312096
Erg													-0.0841625	0.0019852
Erg28													-0.182014	1.09762e-09																	-0.130255	0.000358568
Erh																	0.528041	4.68013e-18			0.491361	1.99008e-11									0.413166	1.78713e-44																	0.673458
Eri1													-0.108287	2.61834e-07
Eri2																															-0.0414555	0.00596598
Eri3													-0.0477558	0.00565141
Ern1	0.108324	0.000579256											0.0754416	1.00982e-06
Erp29													-0.0964282	0.00657144
Esam													-0.180821	3.06371e-07																															-0.219808	0.00253488
Esco2																					-0.317639	0.000169003									-0.0534824	9.31182e-05
Esr1																																													0.0123518	4.99049e-05
Etf1													0.136071	5.52663e-06
Etfa													-0.103952	4.56175e-05																															-0.168569	0.00889818
Etfb	-0.30047	0.00385895			-0.316603	0.00055667							-0.298163	5.14551e-20			-0.337885	7.25686e-08	-0.289996	0.00734817	-0.37613	3.20089e-10									-0.244826	2.5791e-17													-0.262901	0.000625203			-0.343131
Etfbkmt													-0.074814	2.67897e-05																	-0.0648863	0.000736589
Ets2					0.104171	0.000865309							0.0856106	7.77477e-08
Eva1b													0.189131	3.91181e-11
Evi2																															-0.0543503	0.000517913
Evi5																															-0.0667338	0.00154321
Evi5l																																					0.0168458	8.20614e-05
Exo5													-0.0574205	1.11046e-05
Exoc3
Exoc5	0.203776	0.00059351											0.0646491	0.00270963
Exog
Exosc1																															-0.0652486	0.0074367													-0.147957	0.00608648
Exosc10
Exosc2																																			0.577105	0.00903777
Exosc3																																													-0.142719	0.00771172
Exosc5													-0.279506	1.79422e-19																															-0.306872	1.70147e-06
Exosc7													-0.138365	9.12224e-06
Exosc8													-0.111239	3.90697e-06																															-0.155506	0.00129348
Eya2													0.155395	2.93975e-07
Ezh2	-0.129883	0.007231											-0.135189	4.88165e-17																															-0.156738	1.60055e-05
Ezr
F11r					0.0857825	0.00547707
F2rl3																															-0.0608458	0.00282459
F630028O10Rik																															-0.0776428	9.9394e-06
F830016B08Rik
Faap20													-0.147653	1.29188e-06																	-0.109966	0.000461126
Faap24																															-0.0556439	0.00238522
Fabp5													0.012817	2.31167e-08																					0.836148	2.5838e-05
Fadd																															-0.0747664	0.00042281													-0.0880148	0.0022711
Fads1
Fahd1													-0.0977176	2.04436e-09																	-0.107624	9.70494e-08													-0.109674	0.00172569
Fam102a													0.0612097	2.36082e-05																	0.102884	4.49662e-07
Fam102b	0.0987176	0.00917631			0.134109	0.00754341							0.124366	3.26894e-11							0.154878	0.0077005									0.0785993	0.000426398													0.195873	3.4827e-07
Fam103a1													0.141386	4.21301e-05
Fam107b	0.324419	0.000310174			0.396786	3.3383e-08							0.301392	1.10941e-20							0.349469	0.00246374									0.199393	7.03856e-09													0.301991	2.47597e-05			0.352459
Fam110b													-0.0444239	0.00729274
Fam111a	-0.131101	0.00735999											-0.118412	1.11992e-12																	-0.162516	3.50566e-05													-0.10649	0.00205162
Fam117b	0.230517	0.000106698											0.169268	5.86733e-13							0.19813	0.000197472									0.11966	8.29265e-08													0.236898	4.28097e-08			0.135236
Fam118a													0.0387257	0.00950126
Fam136a													-0.0845332	0.000623854																	-0.0873084	0.00256924																	-0.217372
Fam160b1																					0.200488	0.00777184									0.0962103	0.000359064
Fam162a													-0.242479	2.06109e-18							-0.238538	0.00829941									-0.156764	1.62994e-06													-0.265421	2.90332e-05			-0.259811
Fam168b													0.120675	1.4951e-05
Fam173a
Fam174a													0.143707	0.000163676																															0.197532	0.00459896
Fam192a													-0.101604	5.41009e-05
Fam204a													0.0782908	0.00825973
Fam208a																															-0.123807	2.36982e-05
Fam212a					-0.37058	1.46502e-07							-0.331108	3.75698e-23			-0.34192	4.30887e-09	-0.42114	9.39672e-05	-0.297677	2.37029e-05									-0.379141	3.30545e-41													-0.353757	3.15012e-08			-0.271959
Fam220a
Fam234b																															0.0489464	0.000321838
Fam241a					0.176159	8.29153e-05							0.115881	2.60524e-08							0.0973424	0.00901919
Fam26f
Fam32a																															-0.142159	4.91267e-05
Fam43a					0.192948	0.00199281							0.17368	2.69517e-10
Fam49b													0.110562	0.000913366
Fam50a													-0.0869307	0.000145128
Fam58b																															-0.0927219	0.00207443
Fam60a					0.0103359	0.000233216
Fam69a
Fam69b													-0.130139	3.62595e-06																	0.161402	1.52432e-06
Fam76a													0.155253	1.06368e-07
Fam78a																															-0.0471072	0.0013803
Fam83d																					-0.113136	0.00427762
Fam8a1													0.0838532	0.000124194
Fam91a1													0.0603522	0.00403008																															0.11832	0.00468512
Fam96a	-0.238571	0.00985699											-0.290122	1.04691e-19																															-0.221457	0.00043925
Fam96b																																																	-0.197025
Fancf													0.0424997	0.00728098
Farsb													-0.0846275	0.00107025
Fastk
Fastkd1
Fau													0.0533109	0.00016621	-0.233916	0.0094017	-0.113571	0.000396607													-0.12445	3.78038e-19																	-0.117066
Fbl													-0.18463	4.83013e-06																															-0.361927	3.91014e-05
Fbrsl1													0.07904	0.000119104																	0.0682771	0.00336674
Fbxl12													0.114854	1.29859e-05
Fbxl14													0.134421	2.55421e-05
Fbxl17													0.0714284	0.00272845
Fbxl3																																	-0.0135847	0.00799434
Fbxl6
Fbxl8																															-0.0685694	7.70227e-05
Fbxo11																															0.102623	5.79558e-05													0.0855737	0.00879891
Fbxo21													0.111246	3.48486e-06																	0.114469	4.49933e-06
Fbxo22																																													-0.180652	0.00012885
Fbxo4													0.0431402	0.00403008
Fbxo46																															-0.0441966	0.00751309
Fbxo5																					-0.393331	0.000195117									-0.0578301	0.00640085
Fbxo9	0.64388	7.95512e-23			0.417189	1.39669e-10							0.560497	2.21662e-78			0.262544	2.90967e-05	0.500293	2.00975e-08											0.319486	9.42431e-27	0.771703	0.00367432			0.322162	0.000284697							0.49935	1.83271e-20			0.3424
Fbxw11																															0.0692059	0.00455594															0.0760749	0.000297134
Fbxw4																															-0.106765	5.19299e-07
Fbxw7													0.0538656	0.00452778
Fcer1g													0.184258	6.78784e-07
Fcf1													-0.107653	0.00208942
Fchsd1													0.035647	0.000345133
Fchsd2													-0.229938	4.84694e-12			-0.358031	2.70206e-06													-0.293924	4.46092e-18													-0.265189	6.6117e-05
Fdps																															0.110398	0.000680056
Fdxr													-0.0674828	2.92189e-05																															-0.0956624	0.00334424
Fem1b													0.0832143	1.99588e-05																	0.0814181	5.56104e-05
Fen1	-0.134275	0.000123846											-0.0952416	5.04077e-13
Ffar2																	-0.142957	4.5864e-05													-0.10397	1.71263e-12
Fgfr1	0.213036	8.05025e-08			0.193125	0.000433317							0.222407	4.80593e-29					0.243601	0.00103935											0.12499	2.56734e-14													0.181045	2.56287e-05
Fgfr1op2
Fh1													-0.119682	9.15745e-08
Fhod1													-0.0474813	0.000130951
Fignl1	-0.058646	2.8788e-05											-0.0353077	1.7063e-17			-0.294307	7.70966e-05													-0.160367	7.97482e-08														7.55693e-05			-0.243018
Fiz1													0.0738071	0.00758949
Fkbp11													-0.0683641	0.000118141
Fkbp1a													0.311862	1.86757e-21																	0.176431	1.03518e-08													0.348452	1.55012e-06
Fkbp2													-0.184189	1.54845e-13																	-0.104426	0.00539034
Fkbp3													-0.170585	3.19934e-06																															-0.257743	0.000475369
Fkbp4													-0.188658	3.86995e-06																															-0.341858	1.01763e-06
Fkbp5	0.0787203	0.00113544			0.190863	0.000161323							0.145794	1.87554e-12							0.239965	0.00174699									0.1809	2.85257e-10					0.372065	0.0012559							0.26763	3.16829e-09			0.313269
Fkrp																																					0.114026	0.00974086
Fli1																																													-0.252819	0.000729467
Flot1
Flt3
Fmc1													-0.128058	0.00026399																															-0.17114	0.00326113
Fmnl1													0.0976338	0.00295793			0.157249	0.000401784													0.188785	2.60501e-12
Fmo5					0.141956	0.00757606							0.0587429	0.00159911
Fnbp1													0.124647	0.000165143
Fnbp4																																													0.173475	0.00393942
Fnta													-0.150469	2.30101e-06																	-0.119368	2.8207e-05													-0.215307	0.00190384
Fos					-1.00569	1.72417e-12							-0.738962	3.59086e-23							0.681464	0.000689625									0.24245	5.99775e-05													-0.808351	4.51798e-08
Fosb	-0.837563	1.45434e-16			-0.97946	5.1665e-19							-0.909799	4.96342e-80					-0.655934	2.18687e-05											-0.28801	4.90445e-08					-0.960957	0.000364497							-0.865206	2.3017e-19
Fosl2	0.896059	1.11459e-37	0.596964	6.89773e-06	1.07466	3.05438e-45							0.983263	4.57782e-156	0.567868	5.71659e-06	0.388769	3.8041e-15	0.751226	7.97997e-16	0.551703	1.2258e-18									0.550609	2.17242e-79	1.09133	3.17167e-06			0.827659	3.04786e-08							0.942796	1.42285e-56			0.313261
Foxj2													0.0481016	0.00989411
Foxj3																																													0.126437	0.00783214
Foxn3					0.292941	0.0080057							0.167049	7.39116e-05																	0.123513	2.82122e-05													0.208669	0.00397517			0.37252
Foxo1	0.180086	2.46415e-12			0.329015	5.02737e-10							0.374862	2.70083e-61																	0.1239	9.49262e-12					0.501105	1.48588e-06							0.393935	2.56029e-24
Foxo3					0.356274	1.96655e-08							0.213985	1.69917e-14																	0.0957736	0.00677018													0.168267	0.0084286
Foxp1													0.182286	1.98257e-05
Fra10ac1													-0.0836217	0.000152894
Frmd4a													-0.0608278	0.00677061
Frmd6																															0.0677554	0.00337075
Fryl	0.0569915	0.000165505											0.165344	9.3012e-13																															0.218254	2.76491e-05			0.126934
Fstl1													0.0861017	0.000660297
Fth1																	0.133398	0.000659058			0.219809	4.32894e-06									0.183036	1.76262e-23																	0.118284
Ftl1					-0.200152	0.000300051
Ftl1-ps1													-0.0559891	0.00246359
Ftsj3													-0.0727003	0.00507969
Fubp1																															-0.105911	0.00449745
Fubp3													0.0623083	0.00982463
Fundc1					-0.0589947	0.00458468
Furin													0.172437	8.97378e-11																	0.0660622	0.00998374													0.162384	0.00894106
Fut7																															-0.0927229	0.000793653
Fut8					-0.402742	2.47884e-05							-0.309689	6.70665e-13																	-0.161656	0.000178218
Fxn													-0.0846064	9.47154e-07							-0.206034	0.0084066
Fyb													-0.082234	2.38655e-06
Fyn	-0.0321006	0.00996771
Fzd4	0.150407	0.000243032			0.150536	0.00153605							0.132383	2.03104e-14
Fzd9	0.139342	0.000450634											0.129492	1.05032e-18
Fzr1													-0.0516847	0.000189759
G2e3																					-0.332982	1.95357e-05											0.0742088	0.000226574
G3bp1													-0.172035	1.99394e-08
G3bp2													0.123758	0.00777018
G430095P16Rik													-0.0900613	0.00225073																	-0.0678587	0.00934729
Gab2
Gabarap													0.130437	0.000880447
Gabarapl1
Gabarapl2													0.138565	0.000845344
Gabpb2																															-0.0859698	0.00589193
Gadd45b													-0.0607787	0.00173558
Gadd45gip1													-0.124844	0.000214747																															-0.147059	0.00554988
Galc	0.386129	3.25649e-17	0.330618	0.00210706	0.470899	4.20377e-17							0.426056	3.58386e-66			0.166966	1.15602e-05	0.386551	4.53133e-06											0.140662	5.09683e-12	0.600748	0.00249474			0.473716	8.29327e-08							0.396186	1.57917e-29			0.132111
Galk1									-1.07757	0.00179975			-0.13435	6.1694e-10
Galnt1													0.0970331	0.00155429																															0.206064	0.00389205
Gan													0.0771747	8.65039e-05																	0.111052	2.9828e-07
Ganab
Gapdh					-0.20849	0.00724625							-0.172749	1.86916e-10																																			-0.142126
Gar1													-0.160246	9.46749e-07																															-0.304393	1.30961e-05
Gart													-0.106795	0.000123244
Gas2l3																					-0.312973	0.000337346
Gata2													0.10629	0.000607065
Gatad2b													0.126994	0.000163227
Gatd1													-0.103106	0.00197202
Gatm													-0.0489058	0.000414917
Gatsl3					0.095643	0.000382635							0.0843829	2.12024e-06																	0.0547452	0.0027455					0.273641	0.00471808							0.163675	4.87331e-07
Gbp5
Gbp7													-0.146926	0.00024722																	-0.111855	0.00130288
Gcat													-0.0562749	0.00617075
Gcc1													0.0467281	0.000174983
Gcc2													-0.0898412	0.00171449
Gch1													0.07661	0.00173968
Gclm													-0.149296	2.51524e-05
Gcnt1													-0.0829735	3.34579e-08																	-0.0554266	0.000224074
Gcnt2													-0.15334	0.00144007																	-0.149403	0.000432269													-0.353501	1.00314e-05
Gcsh													-0.114169	1.196e-05
Gda													0.122004	0.000114468
Gdf3													-0.0600708	0.000116738
Gdi2																																													0.201713	0.00985695
Gemin2													-0.0590695	0.000652187
Gemin6	-0.0953033	0.00640195											-0.0752975	3.68786e-09																	-0.10349	0.000203587
Gemin8													-0.0360892	0.00414205
Gfi1
Gfi1b	-0.23655	2.0589e-10			-0.16979	0.00017527							-0.20734	1.34618e-35																	-0.110315	9.69166e-14													-0.246242	4.21205e-12			-0.147451
Gfod1																					0.250581	1.76552e-06									0.185804	2.29133e-19
Gfod2													-0.0197875	0.0018727
Gga1													0.185057	9.75399e-13
Ggta1
Gimap1					-0.44639	1.33037e-05							-0.48825	1.37468e-34					-0.35691	0.00223753	-0.243287	0.00515535									-0.334316	6.97197e-23					-0.68402	0.000228135							-0.540052	2.26625e-14
Gimap6	-0.262274	0.00782229	-0.772606	0.00267295									-0.367234	2.31098e-17																	-0.1905	2.3239e-06													-0.294425	5.78718e-06
Gimap7
Gimap8
Gimap9													-0.130808	7.13168e-08
Ginm1													0.103569	0.000427734																	0.0811505	0.00309862
Gins2	-0.0885006	9.97237e-05											-0.0679217	9.32512e-14																															-0.0678961	0.00439922
Gins4	-0.16021	2.32367e-05											-0.128468	4.07717e-11
Glipr2													0.0892018	0.00585576
Glmn													-0.0624694	0.00345408
Glmp
Glod4													-0.0902268	0.00148489
Glrx3													-0.215851	1.53327e-13																	-0.0944417	0.0041862													-0.280161	0.000141294			-0.182291
Gls													0.119662	0.00372467
Glud1
Glul	0.414894	7.96647e-05			0.361343	3.65998e-05							0.434336	1.62245e-31					0.350612	0.00622967	0.264133	0.00335324									0.2014	5.03779e-09													0.595972	2.50903e-19
Glyr1													0.100768	0.00869279
Gm10036																															-0.0738812	0.000676431																	-0.10558
Gm10073
Gm10076															0.767841	7.01646e-12	1.06075	1.40917e-82	0.794892	4.79881e-23	1.00119	5.24983e-56									0.917616	2.52236e-236															0.938529	2.12028e-10	0.985121
Gm10384																															-0.0678292	2.23659e-06
Gm11772
Gm11808	0.422504	3.21602e-10			0.425514	5.84349e-08							0.367918	5.01284e-31																															0.358002	2.10297e-12
Gm12185																															-0.0295453	0.0010964
Gm12216																															-0.136542	4.2356e-07
Gm15261													-0.0517269	0.00817543																	-0.0598955	3.82289e-05
Gm16104													0.0989655	0.000113179
Gm16140													-0.0881154	8.95659e-08																	-0.0730428	1.12911e-05													-0.137107	0.000341141
Gm16141													-0.073256	0.00131978																	-0.0751751	4.50563e-06																	-0.131786
Gm16152																	-0.150599	0.00854975													-0.0961904	0.000428349
Gm16286					-0.353549	0.000294723							-0.164445	0.000326386							-0.278234	0.0023793									-0.197196	5.77396e-11
Gm16740
Gm17473																															-0.0441088	1.68011e-05
Gm19426													-0.032712	0.000601161
Gm19590													-0.315287	1.74357e-14																	-0.228021	9.75075e-12													-0.332147	6.24587e-05
Gm2000	0.19682	0.00303865											0.200185	1.45973e-10																															0.208591	0.00105118
Gm20186	0.246054	1.05792e-07			0.279072	6.81062e-06							0.275673	1.26285e-29																	0.0763506	5.25872e-05													0.17991	5.43509e-05
Gm20604
Gm20696													0.0438534	0.0057826																	-0.0749719	0.000610857
Gm26510																																					-0.0132859	4.00135e-07
Gm26518													0.0517421	0.00222316
Gm26532															0.149617	9.39428e-08
Gm26597																															0.0480608	0.00612771
Gm26632
Gm26699																															0.0817232	0.00899542
Gm26724													0.07609	0.00659633
Gm26735
Gm26782																															-0.082426	0.000522133
Gm26802													-0.0425751	8.0927e-06
Gm26853													0.0968983	1.03688e-08																			0.653692	0.00202286											0.107498	0.00311741
Gm28875	0.185756	0.000406631											0.192664	4.6799e-12
Gm2a													0.127692	0.000192102
Gm32036
Gm32856																															-0.0454961	0.000534947
Gm340																															0.0408498	0.00620493
Gm3550
Gm3604																															-0.0281833	0.00414447
Gm36445
Gm36839																															-0.0311765	0.0051957
Gm4070
Gm42047																															0.0936593	0.000218217
Gm42418													-0.179122	2.16453e-06			-0.406796	2.13699e-05			-0.443674	0.00112689									-0.411299	2.63045e-26																	-0.320353
Gm43568																															-0.0456135	0.000397356
Gm44067
Gm46430
Gm4673
Gm4707																	0.0833246	0.00315449													0.0492166	0.000166962
Gm47283																																					0.556674	0.00371768
Gm4841													-0.0316671	0.00784605
Gm48855
Gm49359
Gm4951													-0.125578	3.42856e-05
Gm5111													-0.0604592	0.000625508							-0.274805	0.00332231									-0.214629	1.09498e-10																	-0.209132
Gm5141																															-0.0432305	0.000292221
Gm5914													0.107729	8.82137e-07
Gm6133																															-0.0485737	0.00256924
Gm6277																					0.106706	5.26068e-07									0.0979967	9.35415e-12
Gm8186																															0.104401	7.08289e-07																	0.162407
Gm9493																					-0.246481	0.00148621									-0.138791	5.19299e-07																	-0.300942
Gm973													0.0657941	0.00826783
Gm9856																															-0.0546358	0.00947417
Gmds													-0.0389844	0.00642319
Gmfg													-0.201984	1.09501e-05
Gmnn	-0.145373	3.73599e-09											-0.120877	2.63964e-23																															-0.0972759	0.00212224
Gmppb
Gmpr2
Gmps
Gna13	0.112775	0.00453109											0.0992893	0.000332552			0.198694	0.00635295			0.231777	0.00029277									0.230235	3.06855e-16
Gna15													-0.0728684	0.00101262
Gnai3					0.359924	2.23774e-06							0.291309	1.07482e-20																															0.289792	4.5088e-05
Gnaq																	0.169309	0.00715649													0.112739	0.000175004
Gnas
Gnat2						0.000619114							-0.0369545	0.000623854
Gnb1					0.206891	0.00745256							0.250611	2.66546e-13
Gnb2
Gne													-0.0558052	0.000190697																	-0.0588676	0.0099428
Gng11	-0.382971	0.00622918											-0.232118	1.068e-08																															-0.296559	0.000388157
Gng12
Gng5
Gnl3
Gnpda1													-0.0513548	0.00183226																	-0.0493706	0.00177143
Gnpnat1
Gnptab													-0.0382607	0.00794592
Golga1																															-0.063317	0.00201022
Golph3													0.0978579	4.55636e-06																	0.100703	0.000105402
Gon7
Gopc													-0.0526313	0.00512768
Gorasp1													-0.0448125	0.00113412																																			-0.0705659
Gosr2
Got2
Gp9													-0.0750109	0.00232102
Gpaa1													-0.0392561	0.00228449
Gpatch11
Gpatch4													-0.12171	1.15091e-06
Gpbp1	0.315492	0.00118568											0.142559	9.89745e-05
Gpn2	0.132859	0.0067615
Gpr132	0.400155	4.46021e-19			0.434847	1.74135e-15							0.400845	9.8158e-59			0.253742	4.99002e-07	0.261649	0.00739859	0.377897	1.26874e-10									0.312338	2.42456e-32													0.385393	2.18589e-18			0.195005
Gpr146	0.291967	5.78493e-08			0.33293	7.20116e-11							0.266631	1.14886e-31			0.153764	1.20082e-05			0.178249	0.000121504									0.177113	3.90506e-16													0.262789	2.44553e-09
Gpr160
Gpr180																															-0.0582029	0.00165866
Gpr65	0.505875	2.15091e-21	0.280391	0.00028322	0.573182	2.53971e-25							0.389551	6.51817e-69			0.424904	5.26742e-16	0.471126	6.96631e-07	0.295897	6.30604e-10									0.40873	1.70593e-49			0.188414	1.38515e-05	0.249574	1.55835e-05							0.301103	4.88329e-21			0.281163
Gprasp2													0.0652608	0.00967358
Gps1													-0.147218	1.06368e-07
Gpsm3					-0.153858	0.00370931																									-0.119573	1.20038e-05
Gpx1													-0.316856	6.20339e-19																	-0.140504	2.98143e-07													-0.276624	0.000310652
Gramd1a	0.37367	3.67219e-13			0.296854	1.98815e-05							0.258745	1.07194e-22					0.299483	0.00629386	0.281389	0.00176094									0.174491	9.10646e-09													0.174629	0.00144073
Gramd1b	0.160114	0.00110979											0.101114	9.06093e-08			0.177293	8.08296e-06													0.211002	6.89928e-20																	0.127694
Grcc10																																													0.156181	0.00960651
Grhpr													-0.0674278	0.00219517
Grk2
Grk6																															0.0910017	0.0044209
Grpel1													-0.176724	7.43551e-12																															-0.148986	0.00181055
Grpel2
Gsdme																																													0.106071	0.00477346
Gsk3b													0.119457	0.000156261
Gskip																															0.0396417	0.00781805
Gspt1													-0.182017	1.11632e-07																															-0.149153	0.00889818
Gsr																															0.0967102	0.00708422
Gstk1													-0.0571603	9.17705e-05
Gstm1													0.16613	2.092e-05
Gstm5													-0.142966	3.03991e-06
Gsto1													-0.151854	2.14961e-06
Gstp1																	0.29502	7.75898e-09			0.136224	0.00856109									0.20991	2.03437e-18																	0.300431
Gtf2a2
Gtf2e2													-0.0815664	0.000427008																															-0.127054	0.00253488
Gtf2h4													-0.0695386	0.000525719																															-0.126807	0.00230039
Gtf3a													-0.247804	6.23495e-19																	-0.149652	2.00108e-05													-0.343534	1.06906e-09
Gtf3c1													0.0837008	0.00525568																	0.0990396	0.0016013	-0.0305162	0.00526002
Gtf3c2													0.1023	7.22782e-05
Gtf3c5																															-0.0465284	0.00833693
Gtf3c6													-0.0922708	2.9196e-06																															-0.120278	0.00720471
Gtpbp2													0.140993	1.21098e-05
Gtpbp3													-0.0492294	0.00079221
Gtpbp4	0.288042	0.00728609											0.130167	0.00286356
Gtpbp8													-0.0395006	0.0096329																															-0.0127212	0.00517468
Gtse1
Gucd1			0.0179568	0.00210706	-0.0113795	0.00412485
Gucy1a1																															-0.0597267	0.000413513
Guk1													0.0236226	0.00584015
Gvin1																															-0.024543	0.00781805
Gypc													-0.124699	3.01115e-06																															-0.213494	5.4115e-06
H1f0	0.383256	0.000170597											0.260924	1.17446e-10																															0.299227	0.00055836
H1fx
H2-Aa													-0.0767131	0.00016621
H2-Ab1													-0.0614466	0.0012973			-0.249494	0.00316036
H2-D1					0.177822	0.00814393							0.168291	1.84819e-12																															0.258558	5.86028e-09
H2-DMa													-0.11478	0.00821819
H2-DMb1																																													0.0613066	0.000173381
H2-K1																															-0.0932154	0.000811973
H2-Q4	0.251707	0.00579898			0.341061	8.20003e-07							0.225006	2.56439e-11					0.341151	0.00665758	0.243954	0.00968965									0.132781	0.000263328													0.339254	1.14257e-05
H2-Q6																					0.323154	0.00648216
H2-T23
H2afj																															0.209249	1.45414e-11
H2afv													-0.159725	3.75364e-07																															-0.140201	0.00406097
H2afx													-0.0655345	0.000757774
H2afy													-0.13684	5.7639e-07
H2afz													-0.347368	1.05003e-23																															-0.399939	5.00184e-08
H3f3a													0.0915567	9.39408e-05																	0.0874804	2.13714e-05
H3f3b	0.271346	0.000577422															0.435538	3.81652e-12			0.425121	1.94089e-11									0.322594	1.48045e-26					-0.623639	1.56912e-05							-0.233203	0.00285795			0.437599
Hacd1													-0.0815827	6.45168e-06
Hacd2													-0.0684875	0.000260485
Hacd4													-0.135444	0.0018727
Hagh													-0.0516323	0.00989411
Hars2													-0.0454544	0.00685915
Haspin																															-0.0575212	0.000562826
Hat1													-0.050311	0.00100229
Haus1													-0.0735858	4.76075e-06
Haus2																															0.0847965	0.000192402
Haus4													-0.115893	2.94639e-07
Haus6					-0.0307667	0.00547707							-0.0324144	0.00076546
Haus7													-0.0563678	0.000127537
Havcr2																															0.0981339	2.6923e-11																	0.108797
Hax1
Hbb-bt
Hbegf													0.0413896	0.00681877																							0.0802313	0.00845532
Hbp1													0.0489816	0.00720475																															0.190958	0.00598396
Hcfc1r1
Hcls1													0.102211	0.00229016
Hdac1													-0.0767905	0.00730652
Hdac6
Hdac7
Hddc2													-0.0883259	0.00183568
Hdgf													-0.0654926	0.000295817
Hdgfl2													-0.0387335	0.00347133
Hdgfl3
Hdhd2													-0.0823083	3.94095e-05																	-0.0934605	0.000610857
Heatr5a					0.160122	0.000106197							0.108145	6.85358e-06																	0.170997	2.65741e-08													0.193436	0.00143433
Heatr6
Hells	-0.109197	2.50936e-10											-0.0699211	7.70538e-21			-0.260811	0.00459213													-0.124043	7.00967e-05													-0.0721953	9.09311e-05			-0.364411
Helz2																																					0.0408321	0.000165102
Hemgn													-0.0557325	3.89327e-07																	-0.0706889	0.000505995
Herc1													0.108093	0.00266069
Herc6													-0.0807521	0.00180581																	-0.0893983	0.00374957
Hes1					-0.736213	1.0572e-08							-0.260283	2.17269e-07																															-0.278896	0.00661626
Hes6													-0.0714891	0.00582196																																			-0.195509
Hexa													-0.127554	0.000764423
Hhex	-0.272589	0.00242269			-0.268362	0.00711167							-0.315554	6.29424e-21			-0.288209	0.000487141	-0.390801	0.000417305	-0.35787	0.000360562									-0.323455	9.80628e-21													-0.352397	6.9655e-07			-0.322126
Hibch													-0.0666883	0.00672565
Hif1a																															0.0855392	0.00856411
Hikeshi													-0.106623	5.65961e-05																	-0.0752354	0.00191409
Hilpda																															0.0747606	0.00048553
Hint1													-0.157833	4.76386e-12
Hip1r
Hipk1					0.183533	2.5571e-05							0.112055	1.47125e-05			0.0588781	0.00830933													0.0865095	0.00374957
Hipk2													0.0755582	0.00323006
Hipk3					0.0755566	0.000202754
Hirip3	-0.216541	1.34502e-08											-0.161265	9.65051e-23																	-0.115981	0.00625535													-0.114335	0.00469549
Hist1h1c													0.211638	2.71449e-08
Hist1h1d													-0.0433796	0.0020516
Hist1h2ac													-0.178088	9.49858e-13																	-0.117675	2.93401e-05													-0.188332	6.6117e-05
Hist1h2ae													-0.0624245	2.3083e-07
Hist1h2ap													-0.0433818	0.00222193			0.815593	5.0897e-34			0.868907	2.02653e-16									0.556377	3.38727e-43																	0.714805
Hist1h3d																															-0.0598101	1.32691e-06
Hist1h4i													-0.0230576	0.00794172
Hist3h2a													0.0934782	0.00148494
Hist4h4																															-0.0410041	0.00351051
Hivep2													0.0735089	0.000333863																	0.0769267	8.13099e-07													0.185205	1.31027e-05
Hivep3	0.1269	0.000666822			0.228584	1.53167e-06							0.27123	1.33294e-34
Hjurp													-0.116031	0.000127224
Hk2	0.601426	7.61724e-20	0.31725	0.00701158	0.277846	1.11215e-07							0.543766	2.40528e-78					0.365763	0.000729293											0.0848174	0.00036267					0.30958	0.00469584							0.33001	1.2061e-12
Hlcs													0.0585658	0.000385426
Hlf	-0.28371	0.00385755											-0.301035	8.01065e-12																	-0.376122	1.29288e-17													-0.483879	2.99054e-08
Hlx																															-0.0408834	0.000793653
Hmg20b													-0.0980522	0.000352773
Hmga1					0.180623	0.00645332							0.164362	1.54218e-11			0.132385	0.00497746			0.11313	0.000914067									0.118226	5.18284e-10													0.202259	0.000254525
Hmga2					0.18787	0.001118							0.1052	6.63841e-05							0.254557	0.000394528									0.199286	6.91781e-11
Hmgb1					0.220239	0.00545621							0.173859	6.92257e-09																															0.206114	0.000391508
Hmgb2					0.507934	6.47436e-11							0.220771	7.96747e-06			0.273578	0.00558575													0.296198	5.0856e-12																	0.338941
Hmgb3													-0.123168	0.000611514																	-0.119901	0.00629724
Hmgn1
Hmgn2																	0.356096	1.27338e-07			0.274051	1.99699e-05									0.282588	1.55857e-20																	0.275278
Hmgxb4	-0.0977069	0.00961265																													-0.10693	0.000180781
Hmmr																					-0.42058	0.000647682
Hmox1			0.124172	0.00014275																											-0.050633	0.000139504
Hmox2													-0.196468	1.03965e-07																	-0.124618	0.000929423													-0.332929	1.90138e-07
Hnrnpa0													0.11674	0.00959214
Hnrnpa2b1																	0.242357	6.52252e-06			0.239158	2.82671e-06									0.204319	2.23064e-15																	0.249217
Hnrnpa3													0.109511	0.00316195			0.244751	2.76143e-05	0.322648	0.00246219	0.225358	0.00148621									0.247862	9.58913e-21																	0.237452
Hnrnpab																	0.254752	2.10165e-06													0.215393	2.07856e-15																	0.208709
Hnrnpc																																													-0.138667	0.00241891
Hnrnpd					0.237925	0.00737689																									0.115499	8.63505e-05					0.490382	0.00881484							0.247505	0.00757683			0.227801
Hnrnpdl	0.394444	5.84454e-05			0.261975	0.00258345							0.40554	1.0112e-31			0.436238	3.15947e-12			0.289855	0.00476654									0.310902	4.24496e-25					0.421443	0.00869584							0.394318	6.11497e-12			0.37947
Hnrnpf	0.210014	0.00548538											0.0999042	0.00474912																	0.109841	8.68124e-05
Hnrnph1
Hnrnph2	0.278086	7.59279e-05											0.222732	2.2242e-11
Hnrnph3					0.266765	0.00725598							0.172884	1.19478e-05
Hnrnpk	0.248109	0.000174129											0.109794	0.000375282
Hnrnpl													0.162515	3.66793e-05																							0.469074	0.00379875							0.188942	0.00184124
Hnrnpll													0.0780859	0.000246093
Hnrnpul1
Hnrnpul2					0.0918526	0.00985965
Homer1													0.0604229	7.70072e-05																					0.22026	0.000496272
Hoxa10
Hoxa5													0.216358	1.61357e-15																															0.226471	0.00136212
Hoxa7													0.11103	0.00207641
Hoxa9													0.056195	0.00126297
Hoxb2													-0.0717777	0.0029074																							-0.00615164	0.00132643
Hpf1													-0.14742	3.97928e-09																															-0.156612	0.00724509
Hs3st1																																														0.00338375
Hs6st1																															0.0554475	0.00678391													0.0966286	0.00513848
Hscb													-0.141656	0.000155465																	-0.128773	6.99678e-05
Hsd17b10	-0.469443	0.000110203			-0.458526	6.9512e-06							-0.42974	1.45461e-26																	-0.119145	0.00138759					-0.797203	1.26912e-05							-0.532409	6.88282e-14
Hsd17b11					0.220223	0.00119927							0.089131	0.00218277
Hsdl2
Hsf2													-0.0357678	0.00286104
Hsp90aa1	-0.341362	1.21258e-07			-0.266458	0.00214447							-0.349309	1.99455e-31																															-0.381898	2.32029e-11
Hsp90ab1	-0.177006	8.20025e-05			-0.24977	5.83487e-08							-0.1984	6.60362e-24																															-0.14086	0.00186789
Hsp90b1													-0.110979	0.000533491
Hspa1a																																																	-0.0995849
Hspa1b
Hspa4	0.294332	0.000492978	0.592241	1.97204e-05	0.512089	8.16865e-13							0.504485	8.49573e-55																	0.130606	0.000441675													0.435562	2.47531e-09
Hspa5													-0.167198	1.64632e-05
Hspa8	-0.354255	4.16376e-11			-0.363212	4.11722e-11							-0.348832	1.72129e-46			-0.230734	1.17423e-05	-0.356874	1.73412e-06	-0.350807	3.44469e-08									-0.285127	2.44986e-30													-0.350255	3.41433e-14			-0.233219
Hspa9
Hspbp1													-0.133473	3.41851e-06
Hspd1													-0.268651	6.63794e-12																															-0.283551	0.000467565
Hspe1													-0.255316	6.0582e-15																															-0.391571	1.10155e-09
Hsph1													-0.0499443	0.00485702																															-0.102195	0.00114266
Htatsf1
Htr2a	0.218181	7.01895e-07			0.122163	0.00153605							0.123817	5.53739e-15																															0.118571	0.000239993
Htra2													-0.0846938	0.00143138
Hvcn1																	0.123217	0.000478623			0.215083	0.00232202									0.142667	3.74276e-13																	0.116335
Hyal2													-0.0399944	0.00719399			-0.0987754	0.000478623													-0.0990968	1.63441e-13
Hypk	0.237244	0.00111372											0.15062	1.96209e-06			-0.325607	2.66783e-07													-0.151768	1.09718e-06																	-0.240615
Iah1																															-0.083415	0.00403291
Iars2			0.0694571	0.000307433
Icam2													-0.110184	3.73159e-06
Ick	0.315633	3.08299e-10											0.149254	3.04289e-13																	0.0802639	0.00216021													0.143875	0.000475369
Id1					-0.288892	4.19583e-05							-0.115907	3.42207e-05																															-0.155643	0.00789088
Id2													0.0562571	0.00639098
Ide
Idh2													-0.186025	1.19416e-08																															-0.231909	0.000501694
Idh3b
Idh3g													-0.10767	0.00524569																															-0.223491	0.00338537
Ier2															0.594804	0.00795999	0.512344	1.44915e-08			0.959636	8.68616e-18									0.48485	4.54457e-26																	0.304358
Ier3					-0.659698	3.41048e-09							-0.287459	4.99329e-10			0.286409	0.000293364													0.221081	1.8517e-06															0.542926	0.00682786	0.24412
Ier5													-0.108413	0.00343855
Ifi203													-0.171137	0.000355409																	-0.229457	8.64364e-08
Ifi35													-0.0896624	0.0023608
Ifi47	-0.29974	7.45575e-05			-0.36065	1.80752e-07							-0.340961	6.17082e-28			-0.329734	8.41651e-07			-0.270956	0.00920935									-0.338486	7.17156e-25													-0.331644	4.71653e-07			-0.314079
Ifih1																					-0.134411	0.009893									-0.085735	0.00162894
Ifit1													-0.0597016	0.00381476																	-0.0923672	8.37118e-07
Ifit2													-0.0494489	0.00113418
Ifitm1																															-0.175603	0.00525751					-0.394753	0.00596284
Ifitm2													0.0925366	0.00248738							0.306014	1.40953e-05									0.243728	1.74138e-20																	0.203683
Ifitm3													-0.122692	8.77359e-05																	-0.229109	4.54548e-09
Ifnar2
Ifngr1	1.25783	1.03039e-107	0.912782	1.05068e-15	0.974976	3.8901e-65							1.16572	0	0.619743	4.06272e-08	0.919303	2.03782e-52	0.986264	6.2734e-28	1.07558	2.9787e-55									1.04952	9.14648e-230	1.29537	2.06146e-17			0.880755	4.05447e-18							1.02182	5.68834e-117	1.22694	8.63247e-22	1.0633
Ifrd1	0.0865083	0.00239749
Ifrd2					-0.145333	0.000497239							-0.126989	7.37368e-13																	-0.0990224	0.0090084													-0.152467	0.000187958
Ift20													-0.127053	0.0019501
Ift27													-0.0890728	7.10463e-06
Igf1r					0.235081	0.000341907							0.267473	1.00669e-14																															0.218783	0.00620678
Igf2bp2													0.0965867	0.000221566
Igf2bp3													0.0887075	9.84519e-06
Igfbp4	-0.270106	0.0069198			-0.27283	0.00138935							-0.230969	4.88021e-14
Ighm																	-0.287927	0.00255595													-0.248813	5.81834e-09																	-0.337513
Igtp	-0.174829	0.00851568	0.0673378	0.000385991									-0.147759	3.22482e-07																	-0.0870574	0.00289669
Iigp1																															-0.0796354	0.00586074
Ikbip													-0.0834792	3.49788e-05
Ikzf1													0.133847	4.0609e-05																															0.228791	0.00174384
Ikzf2																															-0.139089	5.10284e-05
Ikzf5
Il10rb																															-0.114559	0.000552175
Il12a													-0.0566306	8.60973e-05			-0.317985	2.70533e-10			-0.451217	1.80797e-10									-0.405458	4.14314e-47																	-0.323344
Il16	-0.227012	0.000118294			-0.212934	0.00139728							-0.228465	7.7364e-19			-0.185861	0.00657884			-0.276241	0.000544214									-0.229265	1.90385e-15													-0.190465	0.00102515			-0.271035
Il18
Il1r2																	0.122975	0.000551141			0.152188	0.000320112									0.180048	1.6495e-21																	0.14845
Il21r	0.142247	0.0010472			0.177879	0.00612912							0.0876833	1.35148e-06
Il2rg													0.211091	8.01798e-09																	0.191334	7.83296e-09
Il4													-0.0735045	0.000574143
Il4ra	0.270749	7.91096e-07			0.25271	1.2147e-07							0.274386	3.74962e-35																	0.151999	2.07e-08					0.486301	4.64525e-11							0.292557	6.52809e-20
Immp1l
Imp3													-0.197975	1.73879e-08																	-0.106548	0.00299995													-0.14566	0.0019093
Impa2													-0.120234	4.75959e-06
Impact													0.14752	3.60603e-06
Impad1													0.0975526	0.000160724
Impdh2													-0.27109	1.54845e-13																															-0.260762	0.000239993
Incenp													-0.0336928	5.53615e-06
Ing2																															0.102211	0.000836659
Ing5			0.214072	0.00104645									0.0878984	1.00892e-05							0.176816	0.00648216
Inhba													0.0970639	2.13002e-06
Ino80e													-0.097424	4.29799e-05
Inpp1
Inpp5a													0.0508389	0.000111706
Inpp5b
Inpp5d																	0.255212	1.57647e-05			0.259245	8.02491e-05									0.246066	1.15594e-17																	0.255555
Insig1													0.0939803	0.00618802
Insig2
Ints10													-0.0716648	7.4872e-05																															-0.118539	0.00224451
Ints6
Ints9
Invs													-0.0621153	7.26743e-05
Ip6k1													0.105992	0.000130354																	0.11798	1.22579e-05
Ipo11					-0.313176	0.000341907							-0.172612	1.24624e-07
Ipo5																	0.283522	0.00054969
Iqcc
Iqgap2													-0.139398	0.00215831
Iqsec1													0.089443	4.77725e-05																															0.131238	0.00175661
Irak2													0.0905212	5.3071e-09			0.12813	0.00018877			0.127854	0.000298744									0.165973	8.27095e-21													0.103109	0.00114266			0.148607
Ireb2
Irf1																					0.307457	0.00103139
Irf2													-0.309671	3.99948e-14																	-0.218195	4.18819e-11													-0.372689	3.71906e-06
Irf2bp1
Irf2bp2	0.487226	7.39462e-10			0.461398	8.48409e-14							0.352393	5.76557e-30																															0.25846	1.97593e-05
Irf3
Irf5																															-0.0536858	0.00956115
Irf8	0.124323	0.0051435			0.153131	0.000240724							0.135086	1.08599e-16																															0.145073	5.5378e-06
Irf9																															-0.0978844	0.00381854
Irgm1													-0.104764	0.00206328																	-0.109205	0.0063342
Irgm2													-0.0516288	0.00196884																	-0.0439974	0.00278803
Irs2	0.0816611	0.00219651			0.247284	3.18419e-07							0.174145	3.01641e-22							0.0976837	0.00225285									0.0840805	1.03298e-07																	0.0675805
Isca1					-0.355156	0.000338716															0.174459	0.00313146									0.0980695	0.000416147
Iscu
Isg15																															-0.104748	0.000325487
Isg20													-0.117168	1.57644e-05																	-0.0946972	0.00054493
Isoc2b													-0.0515528	0.0061207
Ist1													0.0700947	0.00935402
Isy1	0.250509	0.00168421			0.310216	1.55439e-08							0.209632	5.50531e-16																	0.175852	2.14166e-10													0.204546	0.000500843
Isyna1									-0.970765	0.00219071			-0.0945763	1.19083e-06
Itga2b
Itga4													-0.126467	2.82008e-05																	-0.149941	3.33117e-05
Itga5																																					0.0499481	6.27496e-07
Itga9
Itgal
Itgav																																													0.0526176	0.000500843
Itgb1													0.109158	0.00306222																															0.157578	0.00255586
Itgb1bp1
Itgb3	0.112739	0.00256868											0.0669857	6.67839e-07																															0.107829	0.000885735			0.0609312
Itm2b													0.0704856	0.00866726																	-0.0740063	0.00718645
Itm2c																					0.111008	0.00673998									0.158153	2.44599e-08
Itpa													-0.098178	9.17948e-07
Itsn1					0.367986	2.95447e-06							0.167138	5.11313e-09																	0.101192	9.09169e-05
Ivd																															0.0844891	0.00788613
Iws1
Jade1	0.205196	0.00672304			0.0976353	2.61309e-06							0.196452	8.97403e-16																															0.208331	1.73498e-05
Jade2													0.0877959	8.92901e-05																															0.138391	0.00393942
Jag2	0.15108	0.000891229											0.189018	5.37433e-17																	0.101072	1.41006e-09													0.139861	0.00143433
Jagn1													-0.101847	0.000235858																	-0.142537	5.48389e-06																	-0.217054
Jdp2	0.226955	6.37414e-09			0.162241	4.7163e-05							0.198181	3.15136e-33			0.237629	2.54758e-06	0.283858	0.00127697	0.328423	1.06103e-10									0.299008	2.49066e-32					0.163615	0.00869584							0.188492	1.32712e-14			0.282525
Josd2					-0.146766	0.00578121							-0.0907563	6.6239e-05																	-0.0895324	0.00813612
Jpt1													-0.155365	3.13248e-06
Jpt2																																													-0.106026	0.00251194
Jun	-0.933164	7.99912e-08	-1.13695	0.00371047	-1.08151	1.63758e-13							-1.16107	2.40202e-67					-0.568	0.00492309													-1.90495	0.00499821			-1.38376	1.47423e-09							-1.45687	9.97339e-36
Junb																	0.446691	3.57956e-05			0.731424	4.96383e-10									0.433411	8.06628e-16																	0.326016
Jund																					0.41559	0.0084066															-0.639075	0.00143237							-0.341385	1.1931e-05
Kansl1													0.0896173	0.00424486
Kansl1l																															-0.121896	3.15936e-06
Kat2a													-0.0650211	0.000848737
Kat7																															0.11482	0.000199362
Kcnab2																																																	0.119479
Kcnk12													-0.0552793	0.00327754																	-0.109816	0.000734065
Kcnk5					-0.125063	0.007199			-0.737783	0.00218126			-0.143085	1.95709e-11																	-0.054236	8.98637e-06													-0.131903	0.00692907
Kcnq1ot1	-0.44944	2.42114e-05											-0.207451	2.83774e-05			-0.340667	0.00341264													-0.275323	1.91064e-10
Kctd1													-0.0764544	0.000407101																	-0.0825532	0.00813612
Kctd10													0.144032	1.045e-08
Kctd12																					0.274833	0.000726376									0.216818	4.61889e-12																	0.203148
Kctd13																															-0.0610725	0.00514113	0.0478021	0.00728647
Kctd14													-0.0684412	1.00892e-05
Kctd17																																					0.0751603	1.476e-07
Kdelr1																	-0.186512	0.00534088													-0.104368	0.00479165
Kdm3b													0.0841745	0.0052326
Kdm5b
Kdm6b	0.269673	5.63235e-05											0.268836	2.32244e-20			0.157141	0.000293246			0.275268	0.000112436									0.20714	7.17181e-16			0.473383	0.00766866									0.295188	1.37791e-07
Kdm7a	0.211598	0.000345066											0.110883	9.33369e-06
Keap1
Khdrbs1			0.565357	0.00124631
Khk	-0.237632	0.00240122											-0.142226	8.40991e-05
Khsrp
Kidins220													0.0694886	0.00989411
Kif11
Kif15
Kif17																															-0.0550644	0.00761607
Kif18a													-0.0270714	0.00639679
Kif18b
Kif1bp
Kif20a																					-0.381556	8.02191e-06									-0.0296318	0.00501026
Kif20b													-0.0355529	0.00045089							-0.486115	3.1735e-06									-0.0925372	0.00230272
Kif22																					-0.349437	0.0012153
Kif23													-0.0338372	0.00113418							-0.437568	0.000158665
Kif2c
Kif4																					-0.282256	0.00740084
Kif5b	0.276062	0.00848824											0.194271	7.24138e-08
Kifc1
Kin													-0.101426	2.67441e-07
Kit													-0.127638	0.00820052
Klf10													0.231446	2.74306e-13							0.185144	0.00343937									0.0863665	0.00761607													0.273693	3.91014e-05
Klf11
Klf13	0.796872	1.30874e-30	0.891386	3.60819e-12	0.73002	6.24242e-23							0.892278	1.97922e-153			0.278425	2.97489e-05	0.409214	0.000104189	0.547638	7.69419e-13									0.407096	7.89367e-40			1.05974	2.95811e-14	0.616002	0.000446629							0.740106	1.94115e-42			0.338183
Klf16																																													0.0932647	0.00132262
Klf2	0.767523	2.00428e-06	2.02398	1.07556e-11	0.69652	8.29153e-05							0.987807	1.04619e-39	0.583628	0.00220366	0.227946	0.00105221	0.613672	0.00660964	0.513611	0.00038671									0.460688	7.56486e-24													0.661424	3.03879e-05
Klf3													0.112516	1.54671e-07																	0.107124	0.00191319
Klf4													0.137262	0.00130585
Klf6	0.63517	5.41653e-07											0.375276	2.64707e-11																	0.250507	4.44084e-06
Klf7																																					0.249516	0.00023773
Klf9	0.887277	1.06795e-24	0.82911	1.46534e-06	0.556821	2.72407e-10							0.799566	1.61979e-90			0.288812	6.03941e-10	0.51232	1.2633e-05	0.390419	7.17797e-11									0.319428	1.65724e-29													0.684692	4.32584e-20			0.441942
Klhdc8b																																													0.106277	0.00466815
Klhl2													0.0657669	0.00207936
Klhl23													-0.0448207	0.00238465
Klhl24					0.0755464	0.00912898																																											0.243739
Klhl3													0.0668915	0.000779023
Klhl5
Klhl6													-0.143247	1.45625e-06																	-0.108408	0.00242637
Kmt2a
Kmt2c													0.106173	0.00238328
Kmt2d					0.129817	0.00252605							0.107244	1.57938e-08
Kmt5b													0.109804	0.000478164
Knl1
Knstrn																					-0.347189	0.00251795
Kpna1																															0.0693791	0.00291279
Kpna2
Kpna4													0.115334	0.00020367																															0.221835	0.0015842
Kras					0.178963	0.00515691							0.17962	1.14501e-13																															0.249191	4.64254e-07
Krcc1													-0.203946	1.19609e-10																	-0.160112	3.90511e-06													-0.156896	0.00410509			-0.2228
Kri1
Krr1													-0.0694515	0.00749774
Krt18													-0.104418	0.00761491
Krtcap2	-0.393924	0.000101659											-0.170667	2.63224e-05																	-0.126841	2.53332e-05													-0.171058	0.00156371
Ksr1																															0.0452303	0.00265483																	0.0704576
Ktn1
Lactb2			-0.0178513	0.000651485
Lag3													0.042565	0.00315608
Lage3													-0.151069	4.22381e-07			-0.0721128	0.00253773																											-0.172477	0.00128478
Lair1													-0.0667741	1.77843e-05
Lamc1																															0.0590096	0.000488924																	0.0563948
Lamtor1																															-0.10468	0.0045652
Lamtor2													-0.202548	1.53124e-10																															-0.289085	3.93977e-05
Lamtor3																															-0.131747	2.09111e-05
Lamtor4													-0.194406	7.802e-08																	-0.145912	0.000129921													-0.27311	0.000161683
Lamtor5													-0.114575	0.000841758
Lancl1																															0.0857498	0.00633205
Lancl3													0.0729305	4.86824e-05																															0.0852118	0.00961161
Lap3													-0.141041	6.02695e-06
Laptm4a																															-0.123725	0.00013555
Laptm5													0.174612	3.50312e-06																	0.101625	0.00314987
Larp4b
Larp7	0.277047	0.00225985											0.145618	3.56696e-05																	0.127534	0.00062194	0.823202	0.000870321
Lars													-0.0412167	0.00465114
Lars2
Lats2	0.130588	0.000354199			0.0798116	0.00918699							0.0932224	3.6457e-08																															0.0975593	0.00808317
Lax1
Lbhd2						0.00840554
Lbr	0.197383	0.00222105											0.170346	2.71795e-08
Lca5
Ldah													-0.0701895	0.00606982
Ldha
Ldhb
Ldlr																															-0.0724994	0.000603453
Lefty1													-0.0592814	6.95786e-09
Lemd2	0.344239	1.71988e-06			0.270335	5.29351e-08							0.289362	3.94747e-27					0.333252	0.00390572											0.162308	6.27036e-09													0.192805	0.00332593
Lemd3													0.0861932	1.87537e-06																	0.0697048	0.000498116													0.114325	0.000282488
Leo1													-0.0641627	0.00462811																															-0.13464	0.00317709
Leprot					0.181058	0.00758929							0.104271	0.00161546																																			0.175691
Letm2													-0.0910417	0.00265061
Lgals9																	0.365641	4.45614e-05													0.232132	1.05983e-10																	0.451153
Lig1	-0.163803	2.75858e-06											-0.11591	2.45637e-19																															-0.131208	3.99649e-05			0.236128
Limd2
Lims1													-0.142501	1.37688e-08																	-0.238464	8.15135e-14
Lin37					-0.157823	0.00670139							-0.0846237	0.000186023							-0.208152	0.00126469									-0.106013	2.03726e-05
Lin7c	0.221504	0.00662033			0.1983	0.00644043							0.194934	7.67328e-12																	0.104287	0.000322769													0.225963	0.000282488
Lin9													-0.0401434	0.000257386
Lins1
Lipa																															-0.0742641	0.00468695
Lipt2																															-0.0646871	0.00149017
Litaf																																					0.110916	1.50454e-06
Lmcd1	0.124233	1.84959e-06	0.516773	4.8904e-08	0.45707	1.59919e-15							0.57802	1.04674e-91
Lmna													0.118359	1.9858e-12							0.0837242	0.0084066									0.0952739	3.31488e-10													0.136899	0.000161856			0.177324
Lmnb1													-0.122084	7.87012e-15																															-0.0945557	0.00421548
Lmnb2													-0.0415621	0.000307445
Lmo1
Lmo2													-0.0966282	0.00325504																	-0.165999	3.18621e-06
Lncpint													0.159831	8.47759e-09																	0.103618	3.35978e-07													0.191501	0.00242859
Lnpep													0.165831	1.84343e-07																																			0.132357
Lockd													-0.0480034	1.65745e-05							-0.302612	0.00889921
Lpar6					-0.166946	0.0031798							-0.15758	7.53576e-11																	-0.1114	2.96294e-07
Lpcat3													0.0884603	0.00515428
Lpin2													0.0892169	0.000169142
Lpp																																					0.454387	0.00974086							0.171557	0.00302203
Lrch1													0.0550268	0.00117639
Lrch4																															0.0400497	0.000880431
Lrmp													0.16858	2.34888e-08																	0.119738	0.0003243
Lrp1
Lrp10	0.167439	0.00585635																													0.100003	0.000925679
Lrp5	0.123365	1.18933e-05			0.20598	3.91997e-07							0.176377	8.91633e-24																	0.108536	2.1772e-07													0.191517	2.93769e-10
Lrp8													-0.041846	0.000160517
Lrrc42													-0.0671989	0.000623854
Lrrc47
Lrrc58													0.158577	3.34437e-07
Lrrc75a													-0.0495544	2.86073e-05
Lrrc8a					0.284365	2.03513e-08							0.200279	2.01742e-20																															0.151292	0.00311741
Lrrc8d	0.222187	0.00034759			0.152027	0.00421785							0.213283	7.0808e-19			0.248545	1.24895e-05			0.245932	0.000107361									0.23584	1.15594e-17			0.314144	0.00649289									0.20998	7.59615e-09	0.483741	0.000940219	0.183277
Lrrcc1													-0.102393	7.42181e-05
Lrwd1													-0.0698839	0.00401134																															-0.124836	0.00868334
Lsg1	0.110183	0.0067615
Lsm1
Lsm10													-0.115971	9.22983e-07							-0.210897	0.00144036									-0.15851	1.19754e-09
Lsm14b													0.0370241	0.00994312
Lsm2													-0.180397	3.3573e-08																															-0.210653	0.00864388
Lsm3	-0.309957	0.000204195											-0.286385	4.07733e-24																															-0.181033	2.73599e-05
Lsm4													-0.164411	2.68727e-05
Lsm5													0.113533	0.00880288
Lsm6													-0.109542	3.45427e-05																															-0.142383	0.00753146
Lsm7													-0.112456	0.00977919
Lsm8																															0.0794033	0.00813612
Lsp1	0.252806	0.00583124											0.318085	3.46675e-23																	0.162593	4.45813e-05													0.247345	0.000771765
Lst1													0.210404	1.22709e-07
Ltb																															-0.202709	1.86962e-05
Ltbp3													0.0764918	0.00950126
Ltn1					0.140161	0.00352442
Luc7l2													0.22328	2.96705e-08			0.232963	0.00206886													0.130077	9.91882e-05													0.220955	0.00868334
Luc7l3	-0.318669	0.00020575											-0.234352	4.99314e-12			-0.315125	0.000370505													-0.250326	7.45275e-13													-0.310386	2.78158e-05			-0.608495
Lxn													-0.0848922	0.00153812																															-0.17989	0.000467205
Ly6a																															-0.185668	0.000166687
Ly6e																															0.132728	0.000147789
Ly9
Ly96
Lyar													-0.10985	0.000941395
Lyl1	-0.344263	0.00091469			-0.369721	3.54096e-05							-0.448809	1.03439e-36			-0.350691	7.73777e-06			-0.369214	0.000305289									-0.387159	1.02531e-32													-0.50442	2.0166e-14			-0.550632
Lypla1																															0.0808175	0.00845881
Lyrm2																															-0.0568558	0.00982723
Lyst													0.0828232	0.000131994			0.162948	0.00163123			0.209087	0.00174838									0.159403	4.53066e-10																	0.168553
Lyz2
Lzic																																													-0.0805653	0.00830227
Lztfl1																															-0.130089	5.73908e-06
Mad1l1													-0.0331401	0.00883188
Mad2l1													-0.0326979	0.000602638
Madd													-0.075929	0.00370818
Maff	0.503303	1.86753e-15			0.498149	4.44296e-15							0.467682	3.39532e-52			0.103905	0.00715649	0.286398	0.00322685	0.0858027	1.47463e-05									0.130092	4.70368e-15													0.267116	2.68542e-05
Mafk													0.153012	2.51964e-12																																			0.0768771
Maged1													0.0976427	0.00352048
Magt1													-0.0873456	0.00207761
Malat1													0.185585	1.60267e-13																															0.214936	4.27778e-05
Malt1													0.0829933	0.000247345			0.208232	2.54642e-05			0.324826	1.21532e-05									0.297209	1.31815e-26																	0.167882
Mamdc2					0.209066	0.00547866							0.163233	2.88453e-09
Maml2													0.069163	0.000249521
Maml3
Man1a					0.240366	0.000377987							0.174286	1.01085e-10																															0.206099	0.00216875
Man2a1													0.0933563	1.57069e-09																	0.0949505	1.2961e-06					0.224148	0.000765981							0.145015	2.79477e-06			0.15642
Man2a2	0.424394	9.41772e-11			0.409624	2.1248e-10							0.397011	1.13097e-42	0.336685	0.0091041															0.153023	1.92534e-08					0.476175	0.00881484							0.451024	1.6832e-17			0.227503
Man2b2																																					0.044213	5.17302e-05
Manbal
Maoa																																													0.0100352	0.000311833
Map2k1													0.135493	1.07571e-06
Map2k3	0.331253	8.84697e-07			0.254334	3.38044e-06							0.353842	1.0234e-35			0.232631	1.31616e-06	0.300633	0.00810036	0.443689	3.23346e-09									0.34984	3.76985e-34													0.423333	1.00138e-16			0.233645
Map3k1	0.0989793	0.00782229											0.109294	9.65944e-07																	0.101478	0.000951253
Map3k3																																													0.100169	0.00880896	0.102931	0.00106903
Map3k8													0.0592406	0.00541271																	0.0728144	6.85696e-05
Map4k2													0.107273	0.000384197
Map4k4	0.24489	0.0047219											0.169765	1.2161e-07
Map4k5			0.179683	0.00429251																																	0.125546	3.06028e-07
Mapk1
Mapk1ip1l													0.11572	0.00153038																	0.108836	0.00153755
Mapk6																															0.0937896	0.000321838
Mapk9					0.18087	2.00561e-05							0.0753725	0.00091671																															0.142959	9.2048e-05
Mapkapk2													0.18368	3.1033e-10																															0.209589	0.00129957
Mapkapk3													0.208959	7.06247e-13																	0.0947983	0.000690299
Mapre1													0.127584	0.00597863
March6													0.0889391	0.00126669
March7													0.146032	5.19985e-05
Marcksl1																					0.23924	0.0079779									0.133075	0.000926433
Mark3																															0.0939541	0.00288063
Mark4													0.0857762	2.12599e-05																			0.32106	0.00437799											0.122734	0.00427492
Mars													-0.0536857	0.000298909
Mast4
Mastl																					-0.189425	0.00108883
Mat2a	0.196478	0.00881358											0.240193	8.10026e-10
Matr3	0.2876	0.000537698											0.229383	2.58885e-11
Maz													-0.136183	0.000328275
Mb21d1													-0.0480807	6.89147e-05
Mbd2													0.174573	3.99568e-07																															0.262072	1.58974e-05
Mbd3													-0.122948	0.000759616
Mbd4													-0.0378384	0.00193169			-0.148528	0.00192159
Mbd6													-0.0905417	3.22018e-05
Mblac2
Mbnl1																															-0.121452	0.000831978
Mbnl2													0.131865	0.000192723
Mbp																																													-0.122577	0.00696383
Mbtps1													0.119869	3.05759e-05
Mcee													-0.0988557	0.00060402
Mcfd2
Mcl1	0.415712	0.000133947											0.429996	7.89341e-25			0.494625	6.25128e-12			0.516431	1.06103e-10									0.380741	2.06559e-26													0.341342	0.000126565			0.432901
Mcm2	-0.0881311	8.29526e-05											-0.113443	5.80047e-19																															-0.114351	0.00248106
Mcm3	-0.460957	6.87865e-10											-0.309667	1.06388e-35																															-0.321778	1.59792e-10
Mcm4	-0.187033	1.24118e-06											-0.117909	5.76813e-16																															-0.112521	0.000388157
Mcm5	-0.204664	7.46253e-10											-0.137386	3.39761e-29																															-0.1075	0.000379135
Mcm6	-0.518138	5.87702e-17											-0.350091	4.17737e-48																															-0.361828	4.42528e-13
Mcm7	-0.355766	1.15241e-09											-0.263084	3.43988e-36																															-0.182096	1.02542e-05
Mcm9													-0.000889896	0.00689192
Mcmbp													-0.0252931	0.00361346
Mcoln2																															-0.066429	0.000521763
Mcph1													-0.0409755	0.00694703
Mcrip2													-0.0523521	0.00367191
Mctp1													0.109934	0.000500886
Mcts1													-0.102973	0.00128908
Mcur1
Mdfi													-0.0863979	0.00027154
Mdfic																															-0.0708051	0.000436876
Mdh1													-0.251771	2.01388e-13																															-0.306818	8.18851e-05
Mdh2													-0.0399219	0.00503477
Mdm4													0.135845	5.20027e-05																															0.203222	0.000250144
Mdp1
Me2
Meaf6													-0.108667	1.94551e-05
Mecp2					0.253677	0.000192929							0.110103	0.000309354																							0.306676	0.00677171
Med13													0.0726458	0.00169228
Med13l	0.264838	0.00074711											0.168069	1.46001e-07																															0.212676	0.00171471
Med16													0.0975441	0.000155648
Med19					-0.076377	0.00413563							-0.100292	2.46966e-05																															-0.0976029	0.00590613
Med30					0.218749	8.1682e-05
Med31													-0.0758984	0.00235146																	-0.0882415	0.000464175
Med7	0.1604	0.00385895			0.142127	0.00784022							0.0691228	0.000317587			0.110809	0.00167763													0.166452	3.52056e-08
Med8													-0.0959609	9.86871e-05
Med9													-0.0703372	0.00168426
Mef2c	0.628641	3.85245e-15	0.603525	0.00402463	0.511003	8.57495e-11							0.64793	2.14318e-78																	0.204899	1.80198e-08					0.59486	2.27011e-05							0.589711	5.2941e-23
Mef2d					0.196429	0.00225031							0.210061	1.51634e-14							0.286297	5.21114e-06									0.185157	2.79857e-11																	0.204713
Meg3													0.393986	4.90507e-10																															0.351388	0.000139095
Meis1													-0.181454	0.000180361																	-0.149924	0.00024014													-0.390938	1.83912e-07
Memo1																																					-0.046716	0.00509486
Metap1																																	-0.0005659	0.000345132
Metap1d
Metrn													-0.0403689	0.000262449
Metrnl																	0.136504	0.00065364			0.164774	0.0012351									0.175019	1.55212e-20																	0.121243
Mettl1					-0.200547	0.0082219							-0.12704	0.000367124
Mettl13													-0.0544953	0.000253382
Mettl16													-0.064524	0.0053921																	-0.0862999	0.00625535
Mettl21a													-0.0443758	0.00729603																	-0.0503234	0.00760874
Mettl23													-0.0986346	0.0022094			-0.243774	0.00206886													-0.12042	0.00062194																	-0.216788
Mettl26													-0.10117	0.00164808																	-0.0602059	0.00844429													-0.205584	0.000171413
Mettl27																															-0.112877	1.07869e-05
Mettl3																															-0.0796627	0.00229704																	-0.129665
Mettl6																															-0.072457	0.00866389
Mettl7a1
Mettl8
Mex3c													0.0805426	0.000152894
Mfap1b					0.246053	0.000340104							0.0923405	0.00160941
Mfn1																																															0.123095	1.56015e-07
Mfng													0.211651	1.37708e-09
Mfsd10													-0.106531	0.00250537
Mfsd12													-0.053434	0.00117909
Mfsd6																																													0.173981	0.00299
Mgat1													-0.0700577	0.00127916							-0.255754	0.00319351									-0.265691	7.66947e-17																	-0.3112
Mgat4b
Mgat5
Mgea5																																													0.167266	0.00994132
Mgme1													-0.0830923	3.3384e-06																	-0.133123	5.95709e-09													-0.140593	8.44079e-05			-0.155653
Mgst1													0.0782932	0.00323075																							0.0299174	0.000293451
Mib1					0.12057	0.00719632							0.0871801	1.0407e-05
Midn	0.182903	0.00538612											0.165948	1.55507e-11
Mief1
[truncated: 2,125 more rows]
[truncated: 15 more columns]

## Sheet: GCSF
primerid	logFC_HSC_Metabolism_male	adj_p-value_HSC_Metabolism_male	logFC_HSC_Quiescent_male	adj_p-value_HSC_Quiescent_male	logFC_HSC_Activated_male	adj_p-value_HSC_Activated_male	logFC_HSC_Interferon_male	adj_p-value_HSC_Interferon_male	logFC_HSC_Acute-Activation_male	adj_p-value_HSC_Acute-Activation_male	logFC_HSC_Cell-cycle_male	adj_p-value_HSC_Cell-cycle_male	logFC_HSC_pooled_male	adj_p-value_HSC_pooled_male	logFC_LSK_Primed_male	adj_p-value_LSK_Primed_male	logFC_LSK_Metabolism_male	adj_p-value_LSK_Metabolism_male	logFC_LSK_Primitive_male	adj_p-value_LSK_Primitive_male	logFC_LSK_Cell-cycle_male	adj_p-value_LSK_Cell-cycle_male	logFC_LSK_Acute-Activation_male	adj_p-value_LSK_Acute-Activation_male	logFC_LSK_Interferon_male	adj_p-value_LSK_Interferon_male	logFC_LSK_Interferon cell-cycle_male	adj_p-value_LSK_Interferon cell-cycle_male	logFC_LSK_Myeloid_male	adj_p-value_LSK_Myeloid_male	logFC_LSK_pooled_male	adj_p-value_LSK_pooled_male	logFC_HSC_Metabolism_female	adj_p-value_HSC_Metabolism_female	logFC_HSC_Quiescent_female	adj_p-value_HSC_Quiescent_female	logFC_HSC_Activated_female	adj_p-value_HSC_Activated_female	logFC_HSC_Interferon_female	adj_p-value_HSC_Interferon_female	logFC_HSC_Acute-Activation_female	adj_p-value_HSC_Acute-Activation_female	logFC_HSC_Cell-cycle_female	adj_p-value_HSC_Cell-cycle_female	logFC_HSC_pooled_female	adj_p-value_HSC_pooled_female	logFC_LSK_Primed_female	adj_p-value_LSK_Primed_female	logFC_LSK_Metabolism_female
0610009B22Rik													-0.0448145	0.000361929																															-0.0414948	0.000926297
0610009O20Rik																															-0.0720586	0.00470291													-0.0265536	0.00177071
0610010K14Rik													0.0564984	0.0044683																			0.0728251	0.00173346											0.0522789	0.00012983
0610012G03Rik													0.0403552	0.00441647																	0.102505	0.003016	0.109716	0.000161968											0.0658446	0.000119751
0610037L13Rik													0.0640084	0.00148499
0610040B10Rik													-0.0271846	0.000231023
1110004E09Rik													0.0529035	0.00612433																			0.0785337	9.90905e-05			0.0765057	0.0088189							0.0725439	7.11669e-10	0.169406	0.00493385
1110004F10Rik													0.0902605	1.4357e-06
1110008F13Rik	0.213836	4.7698e-08											0.154466	2.41623e-12																	0.103274	0.00180807													0.0514061	0.00999802
1110008P14Rik																									0.0106026	0.00981612
1110019D14Rik
1110032A03Rik													-0.0685728	0.000208989	-0.13246	0.00665531															-0.122146	9.13968e-08													-0.0454904	0.000986689
1110038F14Rik					0.135767	0.00603045							0.0720616	0.000988117																															0.0598819	0.000213052
1110051M20Rik																																	-0.027967	0.00826027
1110059E24Rik																															0.121198	0.000100832													-0.0376454	0.00174966
1110059G10Rik			0.0023717	0.00989762
1110065P20Rik																																													0.0230369	0.000959819
1500009L16Rik	-0.0986152	3.0108e-06			-0.105344	0.00043639							-0.0971734	3.04741e-13	-0.144002	0.00226778					-0.279509	0.00247688									-0.137573	9.15813e-08	-0.116034	1.20078e-20	-0.0810797	6.71383e-05	-0.0794215	4.14677e-05							-0.0963371	3.06192e-29			-0.171025
1600012H06Rik																									-0.0565825	0.00484435
1700021F05Rik	0.0504297	0.00421473
1700025G04Rik																																													0.03228	0.00307786
1700029J07Rik
1700096K18Rik	-0.050778	0.0064437											-0.0514584	2.28134e-05																															-0.0241869	0.0015869
1700097N02Rik																															-0.0704522	0.00460344	-0.0429996	0.00062964											-0.0321784	6.56931e-06
1700113A16Rik	-0.084347	1.12709e-05											-0.0540434	3.74962e-06																															-0.0223715	0.00898215
1810010H24Rik																																	-0.0236061	0.00572293			-0.0367467	0.00310778							-0.0314446	1.59324e-08
1810011H11Rik													-0.0255347	0.00970539	-0.108413	0.00302502															-0.0516329	0.0054598	-0.0482602	1.29127e-05											-0.0312327	8.33562e-07	-0.0969362	0.00405752
1810013L24Rik																																	0.0299567	0.00994616
1810022K09Rik	0.137259	0.000180775											0.0986319	6.4312e-06																	0.130594	0.000312083	0.0677655	0.000510686											0.0561212	5.82921e-06
1810024B03Rik																									0.00342085	0.00705145
1810032O08Rik																															0.0979439	0.000440254
1810037I17Rik	-0.193343	6.42625e-06											-0.120314	1.85461e-06							-0.253301	0.0081879											-0.229929	2.76443e-20	-0.104983	0.00437738	-0.183191	6.30396e-08							-0.182394	9.83204e-29
1810043G02Rik																																													-0.0317038	0.000461859
1810044D09Rik													-0.0307807	0.00415767																															-0.0182074	0.00740125
1810058I24Rik																																	0.0888991	0.00893344											0.0577309	0.00135632
2010111I01Rik	0.116341	2.31669e-06	0.133859	7.82639e-06	0.0970507	0.00248							0.119062	1.07486e-16			0.142112	0.00248344													0.157541	2.18566e-09	0.0670805	6.72412e-05			0.0560885	0.000894768							0.0546868	1.05814e-07
2010320M18Rik			-0.0573136	0.00991926									-0.042671	7.57927e-05																															-0.0226432	0.00183646
2210016F16Rik																																													-0.0211205	0.00797493
2300009A05Rik																																					0.0766538	0.00594387
2310001H17Rik	-0.152546	1.80574e-06	-0.139614	0.00665016	-0.131334	0.00480316							-0.149017	7.97446e-14	-0.158945	1.12572e-05			-0.25234	0.00336388											-0.113198	3.04344e-07	-0.125169	3.37337e-11	-0.121778	0.000172237	-0.13496	1.71813e-05							-0.130649	6.85242e-22
2310011J03Rik													0.0685752	0.000288368																					0.0675741	0.00592456									0.0160353	0.00298095
2310033P09Rik	0.107004	0.00563104	0.150944	0.000556477	0.128114	0.00872388							0.127715	5.22347e-10	0.21326	0.0094342															0.143587	7.4336e-06	0.0838805	0.00193357	0.087936	0.00918184									0.0740555	2.06202e-06
2310039H08Rik													0.0652106	0.000327708																															0.0693449	1.05504e-05
2310061I04Rik																																													0.0344925	0.00447403
2410002F23Rik													0.0802922	8.5694e-05	0.217014	0.00292321															0.138038	9.39198e-05													0.0585469	0.000126868	0.230567	0.000491856
2410015M20Rik																																					0.134187	0.000209138							0.0657148	1.0575e-06
2510046G10Rik																																															-0.121815	0.00829204
2610002M06Rik																																													0.0429971	0.00103251
2610008E11Rik
2610035D17Rik	-0.101481	0.000104911	-0.118963	0.000434316	-0.123154	0.00381779							-0.123811	2.05922e-13			-0.102242	0.00121929			-0.21031	0.000707965									-0.13554	1.43009e-10	-0.0659247	0.000826374											-0.0556533	9.74529e-07
2610037D02Rik																																	0.0651766	0.00380719											0.0412611	0.00252447
2610044O15Rik8																																													-0.0263965	0.00620761
2610524H06Rik													-0.0561669	0.00619246
2700038G22Rik																															0.112504	3.65111e-06	0.0437883	0.00409978											0.0379029	6.21994e-06
2700049A03Rik																															-0.0695376	0.00685977													-0.0274615	0.00143245
2700097O09Rik			0.0755828	0.00778697									0.0500431	9.97171e-05
2810004N23Rik																																			0.0906357	0.00697701									0.0814858	4.29992e-07
2810006K23Rik													-0.0476337	0.00237232																															-0.0363034	0.000831353
2810402E24Rik			0.0742944	0.00585071									0.0432191	0.00142695
2810403A07Rik													-0.0735572	0.00404914																			-0.0947935	0.00128505			-0.131848	0.00123507							-0.0828651	2.06114e-06
2810474O19Rik															-0.187474	0.00838414															-0.128624	0.000821091	-0.0962243	0.00120059			-0.116559	0.00424709							-0.096841	1.66426e-08
2900026A02Rik													-0.0391971	0.000929537	-0.119174	0.00914052															-0.046039	0.00878067													-0.0283202	0.00178206
2900097C17Rik	0.0909235	0.00303396											0.067775	0.00389686																															0.0479718	0.00710178
3110002H16Rik																																													-0.0230611	0.00165548
3110062M04Rik	-0.0976325	0.00012257											-0.0784353	5.11993e-07	-0.137222	0.00230834															-0.0958914	1.06844e-06													-0.0396538	0.00125383
3110082I17Rik																																	0.0457221	0.00183144											0.0411962	3.59869e-06
3830406C13Rik													-0.0620926	0.00370494																							-0.0973362	0.00195358							-0.0737762	1.59172e-07
4632404H12Rik													0.0215626	0.00789548
4732440D04Rik
4833403J16Rik													-0.0426031	0.00419291																															-0.0287619	0.00391251
4833407H14Rik													-0.0251269	0.00151492
4833420G17Rik			-0.127491	0.00165153									-0.0957793	2.05131e-05			-0.190652	0.00490869													-0.146576	1.46429e-05
4833439L19Rik													0.0381786	0.000434589																			0.0299752	0.00477246											0.0306199	8.05098e-07
4921524J17Rik																																													-0.0487018	0.000703801
4930430F08Rik													-0.0357244	0.00328895
4930481A15Rik													-0.0380367	0.00299958																	-0.0654819	4.59925e-05	-0.0862411	8.3103e-09	-0.123566	1.06974e-07	-0.0988548	1.08299e-05							-0.100934	1.76243e-24
4930503L19Rik													-0.0324963	0.00912241
4930522L14Rik																					-0.0263331	0.00437337
4930523C07Rik	-0.0578936	0.000884942			-0.0906229	0.00465391							-0.0603714	6.37653e-07	-0.144065	0.000121073	-0.119331	0.00998587			-0.277054	0.000530393									-0.175602	7.15821e-15	-0.0464618	0.00215987											-0.0487053	6.06e-06
4930555A03Rik																																													-0.0279068	0.00283775
4931414P19Rik																															-0.02434	0.00646577
4933434E20Rik													0.0762225	0.00102315																															0.0765182	4.78534e-06
5031425E22Rik													-0.0861227	2.32294e-05																	-0.0960061	0.000935718													-0.0535505	0.000582981
5033406O09Rik	-0.190791	6.52699e-09	-0.134766	0.00967992									-0.150549	6.78814e-13	-0.165492	0.00665801															-0.135149	5.47866e-07	-0.136931	5.81067e-09											-0.0944485	8.7709e-10
5430416N02Rik													0.0603039	6.38869e-06
5430427O19Rik																															-0.0974614	9.15455e-06
6030458C11Rik																																													0.0269834	0.00765979
6330418K02Rik																															-0.0432496	0.00760409
6330562C20Rik																																													-0.0253518	0.000871256
9130401M01Rik																															0.0994111	0.00357567			0.0598945	0.00164078									0.0496965	9.05043e-05
9430038I01Rik													0.0522233	0.00052544																			0.0736878	4.46052e-05											0.0541022	2.6685e-08
9530068E07Rik																																													-0.00377621	0.00291512
9930111J21Rik2	-0.0688731	1.98569e-06	-0.0706522	0.0037206									-0.0744301	3.8626e-11			-0.116887	0.00789904													-0.123996	1.15338e-06					-0.0596147	0.00202983							-0.044577	2.55514e-07	-0.178006	0.00111642
A230050P20Rik	-0.0790193	0.00407335
A430005L14Rik																					-0.102526	0.00364049
A430046D13Rik													-0.0315993	0.00998676																	-0.0883981	5.98162e-06					-0.0629535	0.00467947							-0.0388945	3.43529e-05
A630072M18Rik													-0.042391	0.00984154																	-0.101521	0.00701944
A630089N07Rik																																													0.030624	0.00362889
AA467197																															0.039111	0.00712382
AC149090.1	-0.163837	0.000128691			-0.144445	0.00789742							-0.163878	5.50955e-11	-0.208219	0.00702969	-0.275768	0.000128013													-0.203012	3.6126e-09															-0.280543	4.00719e-05
AC160336.1																																			-0.107934	0.00210385									-0.0691799	0.000116449
AI314180																																													0.0558644	0.00125304
AI413582							0.151924	0.00144657					-0.0473916	0.00257206																			-0.0593392	0.000569992											-0.0395495	8.39181e-05
AI480526					-0.0625912	0.00494277							-0.0587998	1.00029e-06																	-0.0745524	0.000173176
AL590144.2			-0.0904883	0.00165153	-0.0915593	0.00236647							-0.0745762	3.56866e-10																	-0.0295821	0.00422387													-0.0563413	9.01621e-09
AU019823													0.0311206	0.000991722
AU020206	-0.098283	0.000352678											-0.0509311	0.00110215																															-0.0516523	0.000389323
AU022252																																					0.0717765	0.000103941							0.0380708	6.00635e-06
AU041133													-0.0227734	0.0056978
AW011738																																			0.0333534	0.00253123									0.0244743	0.00135995
AW112010													-0.102284	1.55752e-05																	-0.130082	0.00216596	-0.110883	0.00165865											-0.0943215	9.11025e-07
AW209491																									-0.0585516	0.0089457
AW549877
AY036118			-0.0924028	7.89412e-05									-0.0678792	1.53438e-06																	0.0898454	2.10045e-05	-0.0639034	0.000548395	-0.0751819	0.00060275	-0.1062	4.39057e-07							-0.0785804	7.75805e-15
Aacs
Aaed1			-0.130691	0.002076									-0.104276	4.45343e-09	-0.183721	0.00132158															-0.106318	0.000282853					-0.0963192	0.000973572							-0.0618134	5.2488e-06
Aagab																																													-0.0327704	0.00868986
Aamdc																																	-0.0694839	0.000783661											-0.0560524	3.19759e-05
Aamp	0.184515	9.87109e-08			0.189418	1.17414e-05							0.158639	4.53273e-16																			0.111332	8.54404e-06	0.120421	7.01639e-05	0.171658	3.40514e-06							0.131792	1.42699e-16
Aars	0.18248	4.91315e-15	0.0911872	7.15942e-05	0.187676	3.77532e-12							0.156761	7.02914e-33	0.193947	0.000630767			0.238784	0.00124086	0.312146	2.53371e-06									0.212619	5.15962e-18	0.147154	1.0041e-18	0.0844407	1.46896e-06	0.0966275	4.19194e-07							0.118884	2.34632e-36	0.171067	0.000550158	0.145189
Aarsd1																															0.0453478	5.43314e-05
Aasdhppt	0.1152	0.000423374	0.115018	0.00131054									0.110254	4.62099e-10			0.191241	0.0070307													0.150295	7.62368e-07	0.0745279	0.00570722	0.0759249	0.00447923	0.0810601	0.0075362							0.0775185	7.87062e-09
Aatf													0.0754715	0.000542929			0.264829	7.9344e-06													0.157379	1.82e-09	0.119122	7.99398e-07			0.0837724	0.00227323							0.0951017	6.58779e-13	0.222635	0.00070879
Abca1													-0.0297077	0.000968188																	-0.0481626	1.29281e-06													-0.0196816	0.00265686
Abca2																															-0.0773435	0.00387894	-0.0473732	0.00729056											-0.0357941	0.000386074
Abca3																																													-0.0335388	0.000459166
Abcd1																									-0.0639297	0.00612954
Abcd3																									-0.0921148	0.00328549
Abcd4													-0.0375086	0.00236926
Abce1	0.208442	7.21926e-09	0.219198	2.15024e-09	0.291935	2.1224e-13							0.249338	1.8488e-35	0.210142	0.000226804	0.208711	0.00771209			0.438417	2.61047e-06									0.255648	4.85079e-16	0.251929	1.55784e-22	0.140918	2.05122e-06	0.205607	1.00836e-12							0.213863	1.01246e-46	0.264727	7.48934e-05	0.237103
Abcf1	0.169812	8.22842e-06			0.16627	0.000810304							0.13435	5.45473e-10																	0.157854	6.17977e-06	0.163122	6.40831e-09			0.16285	6.11421e-06							0.125184	3.06516e-15			0.240838
Abcf2	0.165723	2.35975e-09	0.130043	4.62739e-05	0.144282	7.17194e-05							0.160327	4.89592e-23			0.285239	8.78979e-05													0.212915	1.74924e-11	0.119572	4.02477e-08	0.0740979	0.00238179	0.105953	8.49559e-05							0.108444	4.25687e-19	0.237648	0.000166736
Abcf3	0.0731257	0.00708454											0.0481658	0.00900817											-0.0811824	0.00597133																			0.0333186	0.0024939
Abcg1			-0.113979	0.000604563									-0.0638669	2.96528e-05			-0.152996	0.000167834													-0.159625	2.93147e-11	-0.0654138	0.000151071	-0.0949974	6.51533e-05									-0.0637126	1.79411e-09
Abcg3	-0.0892166	0.000462713	-0.116952	0.00209559									-0.102972	7.20535e-11																			-0.113702	1.59219e-11	-0.137986	1.20995e-06	-0.127741	5.79256e-07							-0.130074	9.02248e-29
Abhd11																																													0.043908	0.00411422
Abhd14a																																					-0.0814101	0.00979756
Abhd14b													-0.0680446	6.89728e-05																															-0.0491204	0.00016965
Abhd17b	0.0937948	0.000193151	0.102353	0.00930084	0.127454	0.00189519							0.103964	1.63444e-10	0.226974	0.000298837	0.204005	0.00181134													0.18572	6.04419e-08															0.236245	0.00129161
Abhd17c	0.0410163	0.00906158											0.0348276	3.81874e-05																			0.0559566	0.00185036											0.0422872	3.1348e-06	0.142688	0.00116533
Abhd18																																	-0.0281591	0.00648519											-0.0292544	0.00169374
Abhd8	-0.0995722	0.0081932
Abi3													0.0423198	0.00137845																			0.0503055	0.00431573											0.0494864	6.33249e-06
Abl2																																	0.0398202	0.00687973											0.0275774	0.00490583
Abr																									-0.07462	0.00981612
Abracl																															0.0932471	0.008275
Abtb1	-0.0487117	0.00273201											-0.0371116	0.00138446																	-0.0878906	1.16331e-06													-0.0373717	2.82579e-05
Acaa2																																	-0.0805778	0.000793385	-0.12074	3.00004e-05	-0.0986077	0.00195528							-0.0975862	1.01119e-12
Acaca
Acad10
Acad11																																													-0.0203387	0.00493665
Acad12					-0.0532237	0.00882438							-0.0456215	2.50587e-06																	-0.0375435	0.00192874													-0.0259808	0.000568228
Acad8																																	-0.0351159	0.00976517
Acadl																																													0.0147398	0.000689382
Acadm	-0.154612	3.72081e-06			-0.145195	0.00673256							-0.142198	1.89951e-11																	-0.114603	0.00150976	-0.145192	4.81304e-09	-0.10463	0.00286847	-0.149939	5.16228e-05							-0.136842	1.00375e-17
Acads																																	-0.0710471	0.000965168											-0.0528367	0.000362525
Acadsb													-0.0575402	4.54914e-06																															-0.0356839	0.000293559
Acap1																															-0.108825	0.00378997	-0.0714328	0.00474967
Acat2																									-0.0694434	0.00170624
Acbd3													0.0640798	0.000686575																															0.0332252	0.00720334
Acbd6	0.19591	3.23275e-07											0.136934	2.19672e-09																			0.0840965	0.00048187	0.0877629	0.000690365	0.103095	0.0020372							0.0911518	6.64143e-12			0.233578
Accs	-0.0454425	0.000961434											-0.0459896	9.50932e-07																	-0.0757333	1.83221e-05													-0.0266416	0.00150866
Acin1					0.197177	0.000412886							0.0946723	0.000107926	0.170817	0.000886132															0.165832	1.12139e-06					0.081879	0.00192673							0.0722212	1.11197e-05
Acot1													-0.0832309	1.8086e-06																			-0.0692214	0.000977239											-0.0697239	1.2693e-07
Acot13			-0.0885554	0.00568335									-0.0786908	2.91004e-06																			-0.102674	7.98641e-07			-0.106774	0.00024653							-0.0952052	2.5852e-14
Acot7	-0.093843	0.00516027											-0.0745425	0.00134715					-0.32401	5.93717e-06											-0.17849	5.21956e-08	-0.168012	1.31308e-12	-0.180094	6.1943e-10	-0.194379	7.90782e-10							-0.187747	1.37056e-36
Acot9																																													0.0520756	3.09812e-05
Acp6																															-0.0709754	0.00792401
Acsl3																																																	0.146626
Acsl5													0.0798038	0.000778093
Acss2													-0.0408936	0.00279688																	-0.0539796	0.0076506			-0.0629508	0.00504354									-0.0425242	2.86567e-05	-0.108454	0.00368184
Actb			0.142723	0.000374038	0.171532	4.39737e-06							0.14196	3.39944e-16											-2.14891	2.45485e-06									0.0894043	0.00398244	0.132474	9.86227e-07							0.0874872	1.90063e-11
Actg1			0.187697	9.02913e-06	0.237014	1.12265e-09							0.172431	7.19749e-19											-2.33602	5.67777e-07											0.0987515	0.00208981							0.0642923	7.36466e-05
Actl6a													0.0909612	4.53483e-06																							0.109354	0.00434978							0.0722852	1.08928e-05
Actr10																																													0.0390127	0.00344024
Actr1a					0.0576847	0.00813891
Actr2
Actr3													0.0997007	4.19136e-05																															0.0570624	4.42757e-05
Actr8
Acvr2b													-0.0268798	0.00270174																	-0.0434879	0.00756818
Acy3																																	-0.0405608	0.000227274			-0.0459309	0.00727912							-0.0341014	1.47035e-06
Acyp1	-0.315052	3.19405e-19	-0.191915	2.09447e-05	-0.276484	7.24224e-09							-0.268589	1.12094e-34																	-0.188898	1.71694e-09	-0.263052	4.30293e-26	-0.170877	2.28789e-07	-0.217727	3.27915e-10							-0.222115	3.10052e-43	-0.225062	6.86726e-05
Acyp2																																													-0.0239692	0.00416833
Adam22																																													-0.0271272	0.00012983
Adamts10																									-0.0509717	0.00238076
Adap1													-0.0410252	0.00216085
Adat1
Adat2	0.0488018	0.0058787
Adcy7													-0.0591998	0.00451577
Add1
Add3																															-0.1061	6.81697e-05													-0.0284545	0.00208541
Adgre5					-0.128516	0.00251008							-0.0778292	2.21657e-06								0.00439998									-0.0423168	0.00368218	-0.102725	7.25352e-09	-0.0811268	0.0036844	-0.129075	6.88695e-05							-0.107464	8.28922e-19
Adgrg1					-0.125411	0.00581165							-0.0734474	0.000616521	-0.235832	0.00283058															-0.193012	6.47632e-06
Adgrl2													-0.0532294	0.000442035											-0.0441168	0.00405365
Adgrl4	0.263882	5.15119e-14	0.198068	0.000232872	0.218954	0.000105927							0.232491	1.02504e-22																	0.137786	0.000651964	0.27643	4.02453e-23	0.172753	9.24909e-07	0.215436	7.99049e-09							0.218522	2.98795e-36
Adi1													-0.0480151	0.00130067																	-0.0725258	0.00525104													-0.0531537	5.06301e-06
Adipor1																															-0.0992967	0.00620971	-0.108176	1.59757e-05											-0.101489	6.52095e-10
Adora2a													-0.0473247	0.000241161																															-0.0389458	5.81062e-05
Adpgk																																													0.0271411	0.00170594
Adprh																																	0.0316432	0.00900852
Adprhl2	0.125192	0.00022689											0.0886963	2.16455e-06	0.197235	0.00192032															0.127288	8.37071e-05	0.0385706	0.00922453
Adprm
Adrb2													-0.0702307	7.05634e-07																	-0.0513449	0.00830833	-0.045203	0.00470839											-0.0371218	0.000617274
Adrm1	0.1738	5.24216e-07	0.172951	1.65989e-09	0.172992	3.27214e-05							0.17907	3.39893e-22																	0.116251	0.00137196	0.0757384	0.000256706			0.0817919	0.00791518							0.0793846	1.07937e-09
Adsl																																			0.0407492	0.00387311									0.0362299	0.00445459
Adssl1					-0.0954731	0.00991317							-0.0571872	0.000343074																			-0.0482418	0.00274259											-0.0572218	2.61154e-07
Aebp2																															0.0957227	0.00300633													0.0523349	0.000153029
Aen	0.176889	6.75928e-09	0.173791	6.78315e-09	0.102473	0.00799643							0.165975	4.38366e-23	0.370626	3.06093e-09	0.332439	9.60486e-08			0.534468	4.75293e-17									0.357779	4.77032e-34	0.195063	9.78956e-24	0.0664555	0.00157758	0.118298	5.48186e-09							0.142847	1.79206e-39	0.283658	1.32418e-06	0.331283
Aes													-0.0645491	0.00212815																			-0.0955662	0.000446034											-0.046391	0.00335838
Afap1l1													0.0089947	0.000253244																															0.055446	0.000766541
Afg3l2																																	0.0455328	0.00980918											0.04642	7.57041e-06
Afp			-0.00390334	0.00972423
Aga	-0.0689422	0.0032861											-0.0722134	7.88605e-07																															-0.0513186	3.35843e-06
Agap3																																													0.0293592	0.000794949
Agbl3													-0.0302337	0.00720914																	-0.0507521	0.000918772	-0.0292402	0.0020731											-0.0206564	0.000400377
Agfg1			0.111581	0.00179661									0.0818746	6.38412e-08			0.12832	0.00326736													0.124599	2.92304e-06			0.0762747	0.00726928									0.0590858	2.76216e-06
Aggf1																	0.15819	0.00780501													0.0946724	0.00641066
Ago4
Agpat4																																	-0.0529366	0.00772426											-0.0516702	1.47541e-05
Agpat5	0.143867	2.94471e-05			0.135361	0.00117829							0.132479	5.45969e-13	0.244407	0.000361502	0.284597	0.000201455			0.31542	2.92426e-08									0.249952	1.71767e-16	0.145738	3.05848e-10	0.10181	2.76665e-05	0.143713	1.19515e-06							0.140096	4.81133e-25			0.217668
Agtrap	-0.0881913	0.00157521			-0.119855	0.00499962							-0.0917753	4.7623e-08							-0.270653	0.00234065									-0.145122	1.01708e-07			-0.0938871	0.00400214									-0.076663	1.7661e-08	-0.169181	0.00621009	-0.149566
Ahctf1													0.0707682	0.000181771																	0.130726	0.000158452			0.105517	0.000203933									0.0697943	2.11983e-06	0.196079	0.00292686
Ahcy	-0.0312729	0.0035457											-0.0181114	0.0013588
Ahdc1													0.0405102	0.00938923
Ahsa1													0.0730702	0.00964944																			0.0834947	0.00491024											0.0763732	4.45732e-06
Ahsa2													0.0489507	0.000236836																															0.0407456	0.000213683
Aig1																																			-0.0992349	0.00607934									-0.0766496	7.06362e-06
Aim2																																													-0.0261122	0.000717148
Aimp1																																	0.0871201	0.00671765											0.0549346	0.000157755
Aimp2	0.198525	2.23202e-12	0.165389	6.84226e-07	0.11473	0.0059978							0.175322	5.73167e-25	0.213716	0.0031229	0.243381	1.66561e-05	0.257938	0.00594536											0.23237	2.29031e-14	0.11984	1.44947e-06	0.0967483	0.000416183	0.102339	0.000186736							0.111989	3.66583e-17	0.24498	2.64911e-06
Ak1													-0.0308801	0.0082637																			-0.0450828	0.000394656											-0.046131	2.00535e-07
Ak2													0.0636389	0.00532648	0.265277	3.6565e-05															0.141734	5.7094e-06	0.132485	1.64118e-05											0.0947976	2.77416e-07
Ak3													-0.0494365	0.000649658
Ak4																															0.0395605	0.00980229
Ak6	0.0824474	0.00132865											0.0688531	1.35123e-07																	0.118537	0.00029211
Akap13													-0.0944055	0.001304																	-0.162483	0.000107647
Akap7																																					-0.0674701	0.00769959							-0.0403627	0.000244485
Akap8					0.0724106	0.00674049							0.031088	0.000352794																			0.0990263	9.84594e-07			0.0661575	0.00692619							0.0891408	3.41928e-12	0.304939	7.11521e-07
Akap8l																																													0.0420217	0.00565794
Akap9																																	0.111253	0.00100296											0.0592586	0.000860342	0.111169	0.00786786
Akirin1	0.10291	0.000290747	0.116154	8.87097e-05									0.0923341	2.784e-09																	0.0997948	0.00076606			0.0744718	0.00210385									0.0352487	0.007266
Akr1a1																															-0.0954403	0.00837229													-0.0629995	0.000831853
Akr1b10													-0.0660575	0.000649112							-0.276629	1.73377e-05									-0.121993	2.5094e-06													-0.0583024	5.22973e-05	-0.155795	0.00558584
Akr1c13																															-0.0999624	0.00224433	-0.065964	0.00112829											-0.0557126	5.05075e-06
Akr1e1	-0.108755	6.00546e-05											-0.0797896	6.82702e-06																															-0.0516003	0.000247035
Akt1	0.141688	0.000707847	0.171952	0.000100779									0.146938	6.47227e-11	0.249993	4.57596e-05															0.158664	1.36695e-06	0.117327	8.26443e-05	0.074998	0.00479359	0.107111	0.0025914							0.10434	2.94909e-12
Akt2	0.141787	9.04181e-09											0.105421	2.31812e-10																	0.061348	0.000700119	0.0829601	0.000483856											0.0605064	7.26601e-06
Alas1																																	-0.0473238	0.00203042
Alcam													-0.0530896	0.00261885																															-0.0468452	0.000280635	-0.160935	0.00296917
Aldh18a1	0.0780404	0.00729444																													0.0915149	0.000875682	0.0751612	6.01561e-05											0.0589977	1.19614e-08
Aldh2	-0.156085	1.15621e-05											-0.11845	2.36589e-09																			-0.135105	2.50405e-11	-0.114103	4.1143e-05	-0.124597	0.000137404							-0.124847	7.98369e-20
Aldoc													-0.051306	0.00185434																															-0.0401085	0.000902263
Alg10b					-0.0735341	0.00335583
Alg11													0.0306179	0.00937518
Alg2													0.0517798	0.00434463																			0.0739872	2.22087e-05											0.0676962	2.507e-09
Alg3			0.0700776	0.00665016									0.0598072	2.28969e-07																			0.0600588	4.88141e-06			0.0656536	0.000307332							0.061048	4.95181e-14			0.035309
Alg5																															0.0999087	0.00390566
Alg6																																					-0.0399072	0.00629775							-0.0197751	0.00481554
Alg8															0.11399	0.00958411
Alkbh1	0.142525	1.7863e-05	0.160463	0.000391788									0.159837	2.1413e-14							0.257472	0.00737653									0.124971	0.00074712	0.10091	0.00398776	0.121964	0.000107811	0.164469	1.05021e-06							0.135201	1.44567e-15
Alkbh2																									-0.0134214	0.00182415
Alkbh3																																			-0.067625	0.000905268
Alkbh5
Alkbh7																									-0.0605896	0.0060733
Alox5ap													-0.100419	0.000144142																	-0.123912	0.00223315	-0.124172	0.000349076			-0.13023	0.00227086							-0.117215	1.84965e-10
Alyref	0.194129	4.07275e-06	0.165381	0.000158325	0.213346	1.64028e-05							0.209494	6.61944e-20	0.20188	0.00125371															0.138846	8.93025e-05	0.216162	1.95341e-13	0.139185	1.10508e-05	0.184721	1.09496e-07							0.183602	1.00147e-26	0.260437	1.7129e-05
Amacr																																													-0.023364	0.00160377
Amd1													0.0546385	0.00197622																	0.158657	4.74532e-07	0.0709745	7.33948e-05			0.072554	0.00468545							0.0630479	5.57976e-09			0.188549
Amdhd2	-0.0568004	0.00532131											-0.0486965	7.76986e-05																			-0.0464017	0.000565868	-0.048414	0.00320732									-0.0434437	6.60536e-08
Amfr													0.0518636	0.00626823																			0.0456748	0.00153756											0.0483631	7.02003e-05
Amn1													-0.0460793	0.0069871																			-0.0568252	0.00866004											-0.0397794	0.00417125
Ampd2																																	0.0723736	0.00158747
Amz2													-0.0718372	3.46499e-05																	-0.106774	8.20191e-05
Anapc10																																			-0.06868	0.00645722									-0.0365805	0.0040752
Anapc13																																	-0.0833601	0.00572293											-0.0519424	0.00744093
Anapc5													0.0838967	0.0010388
Anapc7																															-0.0847516	0.00964302													-0.0356009	0.00494361
Angel2													0.0318493	0.00284809
Angpt1	-0.400701	2.86441e-21	-0.260013	4.29595e-10	-0.296227	4.38529e-08							-0.330815	4.21815e-41	-0.390242	2.54451e-06	-0.396836	5.22599e-06	-0.396296	3.73863e-06	-0.380359	0.00641202									-0.408363	4.42619e-23	-0.377963	6.9825e-32	-0.166594	1.81563e-06	-0.266116	6.59144e-13							-0.278874	8.37088e-51	-0.372539	9.19277e-07	-0.30799
Angptl4
Ankhd1																																	0.0900684	0.000148661											0.0663265	9.99431e-06
Ankib1																																	0.044174	0.00839635			0.0751288	0.00477577							0.0361469	0.00131696
Ankle2	0.0849071	0.000194951											0.0588279	2.30876e-05
Ankrd10	0.161456	3.23864e-05											0.0839588	0.000122043			0.316392	2.34501e-05													0.123884	9.04007e-05
Ankrd11	0.26655	7.85231e-12			0.213789	3.48476e-07							0.202601	1.42676e-20																	0.153058	1.66129e-05	0.180422	1.5824e-11			0.147219	0.000401636							0.143574	7.52585e-17
Ankrd13a																															-0.147039	0.000125359
Ankrd13d																																													-0.0209726	0.00131393
Ankrd17													0.106835	1.7393e-05	0.218191	0.00132011															0.108109	0.000489634	0.117304	0.000194226	0.111144	0.000125312									0.108679	2.80402e-11
Ankrd33b																																													-0.0431387	5.1538e-05
Ankrd39																																													0.0172334	0.00846919
Ankrd40			0.0838383	0.00349826									0.0551041	0.000208189																															0.046321	2.86567e-05
Ankrd44	-0.0595818	0.00308994											-0.0589863	1.23149e-05																															-0.0454793	1.20264e-05
Ankrd49																																	0.0756873	0.00037334											0.0607003	1.80251e-06
Ankrd9
Anks1	-0.113456	4.94105e-05			-0.123281	0.00564149							-0.0972716	2.8922e-08																			-0.0614132	0.00429627			-0.0904601	0.000936894							-0.0624693	9.9876e-07
Ankzf1
Anp32a													-0.105506	5.71109e-05																			-0.103775	0.00669282											-0.0571866	0.00633614
Anp32b	0.189962	7.12456e-10	0.137708	0.000566152	0.187226	2.20126e-06							0.189939	3.07101e-24	0.293742	5.08368e-08	0.161619	0.00032499			0.194108	0.00725359									0.224451	8.81693e-17	0.196802	3.67006e-22	0.21593	5.2643e-17	0.281102	3.25229e-23							0.243379	1.25022e-67	0.291494	3.4609e-09
Anp32e	0.162979	3.41007e-05	0.157589	0.000449401									0.143052	1.74969e-10																			0.12242	5.21363e-06	0.0762818	0.000479638	0.149011	2.76458e-06							0.123333	3.98357e-17
Antxr2													-0.0246178	0.00334297																	-0.0648293	9.40483e-06	-0.0323856	0.000245175											-0.0232764	0.000553851
Anxa1	-0.121378	0.000590249											-0.111705	5.25867e-08																			-0.107345	3.1015e-06	-0.0931204	0.00446496	-0.111767	0.00125851							-0.106069	2.36054e-13
Anxa11
Anxa2													-0.0326802	0.00141426																			-0.048347	0.00240888											-0.0388128	0.000197449
Anxa4													-0.054979	0.00308445																	-0.101172	0.000598655
Anxa5	-0.184184	7.92892e-05											-0.163665	3.5369e-11																	-0.162602	1.15965e-05	-0.193464	2.35677e-11	-0.110995	0.00203477	-0.142931	0.000273268							-0.156889	2.03159e-19
Anxa7	0.26694	9.04901e-14											0.180474	9.76679e-17																	0.141634	4.54927e-05	0.174362	1.09037e-11	0.100332	0.000697918	0.0603963	0.0030369							0.116032	1.93945e-16
Ap1ar																															0.0809527	0.00902941
Ap1g1													0.0507895	0.000564537																	0.082651	0.000777359	0.0784695	3.55521e-07			0.0821625	0.000490665							0.0610298	9.40747e-10
Ap2s1													0.0707134	0.00216123																															0.0492058	0.000278664
Ap3m1																																													0.0411639	4.19743e-05
Ap3s1			0.108866	0.00107845									0.0765015	1.20047e-08																			0.0667733	0.000111712											0.0424701	0.00012601
Ap4b1													-0.015045	0.00263083
Ap4m1																																													-0.00641112	0.00359791
Ap5m1													-0.0409654	0.000317356
Ap5s1																																													-0.0201451	0.000799684
Apbb1																																					-0.0535613	0.00197915							-0.037044	2.72496e-08
Apbb2
Apeh																									-0.0818515	0.00953934
Apex1	0.218847	5.94805e-09	0.114897	0.000114371	0.202627	1.50142e-05							0.199595	6.04158e-22	0.361849	3.379e-11	0.375108	2.66978e-10	0.217938	0.00554631	0.314061	0.000153853									0.333468	1.56722e-29	0.18613	4.02918e-12	0.166183	1.68404e-07	0.238693	1.20391e-14							0.211592	2.1629e-37	0.24307	1.03654e-05	0.342083
Aph1c													-0.0369768	0.00238981																	-0.0390137	0.00596323													-0.0309243	0.00157498
Api5													0.0552906	0.00092424																	0.104814	0.00417322	0.115816	5.13497e-06	0.0940519	0.00206253	0.101314	0.00114072							0.105597	5.88972e-13			0.207164
Aplp2					-0.170899	0.00479986							-0.111749	8.65048e-06																															-0.0692741	0.000386074
Apobec3	0.363051	1.06665e-22	0.34949	2.54003e-17	0.313606	2.75912e-11							0.338197	1.33016e-48	0.343014	2.46347e-08	0.336767	5.01674e-06	0.440443	5.2528e-07	0.400043	5.32529e-08			-1.93033	0.00212202					0.357268	9.88542e-25	0.245723	6.54882e-18	0.152472	1.15177e-05	0.20377	1.57041e-07							0.20222	2.88405e-29	0.229232	0.000402641	0.318325
Apobr
Apoe	-0.194523	0.000369699	-0.253374	4.19939e-06	-0.238063	8.40526e-05							-0.240381	2.65445e-17																															-0.101917	1.56836e-05
Apoo													0.0392523	0.00534338
App													0.0561788	0.00117852																															0.0364829	0.00293037
Appbp2			0.0140385	0.00899299
Appl1																																	0.0609558	0.00732143											0.0595107	2.51851e-05
Appl2																									-0.0801685	0.00897887																			-0.022338	0.00888892
Aprt	0.218612	4.33206e-11	0.191681	1.84473e-06	0.172101	0.00107966							0.209522	1.1005e-24	0.244772	4.61044e-05	0.183986	0.0059322	0.230595	0.00899899											0.238799	5.57217e-13	0.189073	2.41734e-17	0.18633	3.33164e-10	0.224459	7.90354e-12							0.210472	1.94077e-43	0.356388	1.75092e-11	0.194711
Aqp11													-0.0255951	0.000559601																															-0.0190677	0.000688082
Aqr																																													0.04875	0.00016555
Araf													-0.0182538	0.00985577
Arap1																															-0.0664884	0.00311858													-0.04792	0.000101284
Arcn1	0.183949	4.5482e-09	0.137336	0.00029185									0.141795	4.16115e-15																			0.174758	3.67388e-13	0.120698	2.52662e-05	0.104881	0.00553449							0.135396	1.49758e-20
Arf1	0.190643	3.473e-07			0.178443	0.000105927							0.14776	3.76154e-14																	0.111586	0.00035692	0.155245	9.95657e-08	0.071948	0.00377248									0.105955	1.08231e-12
Arf2	0.0655224	0.0065195											0.0685871	1.47099e-06																			0.0822935	7.28809e-09	0.0635362	0.000147737	0.0682186	0.00103745							0.0746805	6.74794e-17
Arf3	0.0547439	0.00237997											0.067477	1.33862e-06																			0.0777819	0.00500701			0.132693	6.88173e-05							0.0847974	1.31393e-08
Arf4	0.200293	6.45514e-08											0.133769	6.73811e-09																			0.138215	3.84894e-06											0.0533945	3.76927e-06
Arf5	0.109781	0.00174062											0.096096	4.94726e-07																			0.133654	1.13648e-07	0.136945	2.0647e-07	0.173093	1.43845e-07							0.144771	7.54072e-24
Arfgap1													0.0466483	0.00804707
Arfgap2	0.0920788	0.00304842											0.069021	0.000841559
Arfgap3	0.077291	2.09237e-05											0.0612526	6.83084e-08																			0.0671677	8.78687e-09			0.0747007	5.36552e-05							0.0565908	1.69658e-14
Arfgef1	0.132979	6.95291e-06											0.0778866	4.57822e-05																			0.100265	9.94081e-05											0.0781589	8.6135e-07
Arfrp1																																	0.0681545	0.00132601
Arglu1	0.196003	8.6611e-08											0.140261	9.5463e-12							0.360956	0.000151561									0.193502	4.20771e-09	0.138772	4.26887e-08											0.0937828	5.65328e-09
Arhgap15													-0.0635516	0.00468422																	-0.163376	2.97704e-06					-0.11629	0.00091535							-0.0577752	0.000396991
Arhgap17													-0.0941613	1.5119e-05			-0.20726	0.00215653													-0.172753	9.19034e-08	-0.0875485	0.00370011											-0.0656261	0.000288456
Arhgap18															-0.23536	0.000153072															-0.129901	0.000123124													-0.0488543	0.000204394
Arhgap31													-0.0599204	0.0061486																															-0.0467668	0.00835563
Arhgap32																															-0.0923466	0.000597922
Arhgap45	-0.159904	9.34626e-06	-0.184975	5.2784e-05	-0.232006	6.10953e-07							-0.192412	5.45961e-20	-0.232455	0.00111051	-0.202775	0.00392371													-0.225809	7.88522e-12	-0.0808501	0.00762378			-0.108142	0.00517915							-0.085909	2.91625e-07	-0.230786	0.000762042
Arhgap6					0.0433273	0.00571611							0.0373816	0.00257039																			0.056648	0.00800472	0.0801399	0.00252534	0.106488	0.000474445							0.073062	2.71345e-09
Arhgdia			0.118981	0.00752373									0.107099	9.32921e-06																			0.0945804	0.00538414	0.135022	3.36046e-06									0.106556	3.28651e-10
Arhgdib													-0.0742893	0.00883381	-0.216765	5.91252e-05					-0.275364	0.00113654									-0.172321	3.64741e-08	-0.139197	4.59267e-05	-0.126925	0.000803154	-0.153116	7.25859e-05							-0.132674	9.99739e-14	-0.245939	7.70365e-07
Arhgef1	-0.103582	0.00347373											-0.0847706	7.75855e-05																	-0.113259	0.00202571
Arhgef18	-0.0611637	0.00365782											-0.059194	5.30153e-06			-0.143453	0.00111054			-0.178097	0.00964931									-0.145506	2.0819e-10			-0.0681371	0.0006841	-0.0664644	0.00914857							-0.0600969	6.4751e-10	-0.159779	0.00622746
Arhgef28																																			-0.0486046	0.000121453									-0.0321142	1.54785e-09
Arhgef3													-0.0411272	0.00259556																	-0.0672317	0.000448921	-0.0314309	0.00752939											-0.0315399	0.000857106	-0.100726	0.00150778
Arhgef39																															-0.0363058	0.00553078
Arhgef40													0.0139358	0.00491802																															0.046837	1.22707e-05
Arhgef6
Arhgef7																																					0.0512371	0.00947184
Arhgef9																																													-0.0229787	1.54128e-05
Arid1b	-0.178831	6.65036e-08			-0.152698	0.00109596							-0.153401	6.62321e-14																	-0.130094	6.03095e-05	-0.108949	4.60535e-05	-0.106276	0.0014007									-0.106094	1.1254e-11
Arid4a																																													-0.0592355	0.0014407
Arid4b	0.0901792	6.47662e-05											0.103756	1.80146e-07
Arid5b	0.0175448	0.00671125	0.189756	4.71491e-10									0.0590476	8.21603e-10																					-0.0106138	0.000175296	-0.0730667	0.00666858							-0.0385702	1.95928e-06	-0.136416	0.00971056
Arih1			0.0873632	0.00683069									0.0581944	9.11445e-05																			0.0766345	0.00664296											0.0576985	0.000366604
Arih2	0.0677665	0.00455335											0.0529315	0.000478158																			0.0240783	0.00204281
Arl1	0.158273	1.5637e-06	0.131365	0.0067434									0.127315	2.68921e-11	0.209823	0.00190198					0.333491	0.000698664									0.170458	6.66353e-08	0.132697	1.01988e-05											0.0880583	5.13656e-08	0.216912	0.000674609
Arl11															-0.215044	1.88232e-05	-0.151716	1.14545e-05			-0.151878	0.00663913									-0.158834	1.91616e-14
Arl13b																									-0.0669187	0.00945749
Arl14ep													0.0279188	0.00976836
Arl3			-0.0736036	0.00895255
Arl4c													-0.0428984	0.000372111			-0.15836	0.000966158													-0.116384	2.4423e-05
Arl5a																																			0.00800152	0.00717758									0.00535505	0.00347721
Arl5b																															-0.0531348	0.00382663													-0.0252013	0.00285338
Arl6ip1																																					-0.127435	0.00104449
Arl6ip4																																													0.021575	0.00317204
Arl6ip5													0.0484423	0.00596464
Arl6ip6													-0.0463193	0.00195371
Arl8b					0.0798572	0.000114245							0.0533032	3.43207e-05
Armc1													0.0503713	0.000444069																	0.10851	0.00105806	0.0698458	0.000376922	0.0852324	0.000147068									0.0671149	1.43333e-09
Armc3																																	-0.0615553	0.000454209			-0.10201	6.12038e-05							-0.0676454	2.18057e-09
Armc6																															0.0742545	3.87445e-07													0.0250741	8.97257e-05
Armc8					0.0816816	0.00815091																											0.036204	0.00450666
Armcx1	-0.0762143	0.00025805											-0.0796097	3.05627e-08																	-0.0964175	5.08922e-07	-0.0684299	1.89964e-05	-0.0931945	0.000321933									-0.081821	2.79527e-14
Armcx2	0.0378446	0.0016515											0.0448196	0.000242723																			0.0539772	0.000500651											0.0362349	0.000987796
Armcx3	0.107722	2.88034e-06											0.0640848	0.000103234																			0.0771564	0.00022159											0.0430521	0.000259326
Arntl																																													-0.0224092	0.00942446
Arpc1a																																													0.0212718	0.00279199
Arpc1b	0.270246	5.95954e-21	0.205492	3.99502e-08	0.257297	1.99718e-11							0.254961	1.60942e-45	0.195651	0.000366907			0.306044	4.02996e-05											0.192104	3.58702e-13	0.247357	5.85628e-33	0.229369	1.6668e-17	0.298213	5.053e-28							0.257597	7.21847e-82	0.229653	1.46877e-05
Arpc2													0.0784586	8.66749e-05
Arpc5			0.142552	0.00044523									0.091425	0.00052544																			0.054945	0.000498052											0.0458017	0.000696792
Arpc5l	0.117823	8.04225e-07			0.206079	4.66023e-06							0.13823	2.12758e-14			0.220277	0.00317039													0.124044	0.000113108	0.147613	4.49717e-10	0.115807	0.000466148									0.124326	3.49028e-16
Arrb1													-0.0490573	0.001304																															-0.0438144	2.01794e-05
Arrb2																															-0.0656547	0.00553065
Arrdc3																																													-0.0329549	0.00594754
Arsa																																													-0.0257944	7.74435e-05
Arsk	-0.0558421	0.00401733											-0.0399336	0.00327626																															-0.0427664	7.67428e-05
Art4	-0.172195	1.36602e-09	-0.208061	4.93957e-07	-0.182484	4.35586e-05							-0.187985	7.85208e-25		0.00171306	-0.0576228	0.00126474													-0.0592372	1.34808e-07	-0.0895344	6.23384e-05	-0.158314	1.15351e-07	-0.132486	2.78345e-05							-0.124602	1.38997e-19
As3mt																																			-0.0382201	0.00525769
Asah1	-0.0985717	0.00317947	-0.18768	2.05626e-05									-0.131016	5.47337e-11																			-0.0889546	0.00025	-0.0976837	0.00396929									-0.0916391	3.74971e-10
Asah2																																	-0.0246356	0.00145151											-0.0179516	0.00476796
Asap1	-0.114992	0.00206121			-0.187931	4.76938e-05							-0.140785	9.39993e-12																			-0.077554	0.00454737											-0.0781735	1.38448e-06
Ascc1													-0.0440565	0.00326981																															-0.057097	0.000179279
Asf1a					0.141651	0.00114982							0.0673049	9.27856e-06
Ash1l																																													0.0626275	0.00269802
Ash2l													0.0518085	0.00308379																	0.106811	0.00600415													0.0569797	4.65977e-05
Asl																															-0.0700897	0.00902941													-0.0375922	0.00586119
Asns	0.229542	9.23379e-14	0.115251	0.000175208	0.183324	2.78044e-09							0.182142	1.19186e-29	0.198989	0.00120853	0.155823	0.00291021			0.258952	1.45548e-07									0.20033	2.78737e-16	0.235332	3.16319e-27	0.0997818	1.63714e-06	0.114498	3.10198e-08							0.168386	9.52594e-50	0.227923	3.95646e-05	0.228023
Asnsd1													-0.0514267	0.00931506
Ass1	-0.0614556	0.00695045											-0.0500547	4.80102e-05																															-0.0276453	0.00745153
Asxl2
Atad2
Atad2b																																													0.0363304	0.00807236
Atad3a	0.197663	2.03766e-08											0.133802	2.58466e-13	0.28718	2.03107e-05	0.346995	1.90345e-09			0.299018	2.68617e-05									0.327063	8.08678e-25	0.221863	6.19265e-19	0.0972117	0.00162074	0.140813	1.15095e-06							0.170502	2.11207e-32	0.365814	1.10525e-09	0.270225
Atad5	-0.0494713	0.000161208											-0.022452	0.00720128
Atat1																															-0.070864	0.00836135
Atf3	0.104495	9.15873e-05											0.0772794	2.72475e-06
Atf4	0.36239	1.8555e-18	0.270887	2.12314e-08	0.332752	2.30359e-12							0.320403	1.56352e-40	0.230431	0.00384155	0.245067	0.00617637													0.24359	1.39655e-10	0.102941	0.00370595											0.070409	0.000549116	0.267339	2.18071e-05
Atf5	0.0963527	0.000283621	0.0748912	0.00162518									0.0865112	4.76662e-11																	0.0330422	0.00799172	0.0838271	1.04389e-06	0.058386	0.00168576	0.0602902	0.00745649							0.0686342	4.43509e-15
Atf6	0.0927996	2.35471e-05											0.0683864	5.09243e-07																			0.0647655	2.47578e-05											0.0450597	1.188e-05
Atf6b																																	0.0687632	3.85863e-05											0.0403161	0.000128585
Atf7ip													-0.104387	2.99382e-06																	-0.10066	0.00751041													-0.0516936	0.00408218			-0.207391
Atg12													-0.0472081	0.00608212
Atg2a																															-0.0573076	0.00512676
Atg2b																									-0.0035999	0.00699287
Atg4b	0.0799945	0.00145515											0.0736771	1.42082e-06																															0.0336924	0.00147306
Atg5																																	0.0653171	0.00524707
Atg9a
Atic																																					0.124777	0.00155826							0.0924494	3.65787e-07
Atl2																																													-0.0238491	0.00809585
Atm
Atp11b													-0.0780371	0.00255047	-0.308531	1.31889e-06															-0.233998	1.99645e-11	-0.0757805	0.000515682			-0.122833	0.00392513							-0.0891023	9.54004e-08
Atp13a1													0.0361728	0.00819749																															0.040367	9.9229e-06
Atp13a2	-0.114672	0.000806718											-0.0899603	7.82071e-06																															-0.0584513	0.00015775
Atp1a1	0.227844	7.8175e-10	0.182862	1.9111e-06	0.17332	9.65557e-05							0.20215	3.76722e-23	0.222382	0.00192556															0.184765	4.42042e-08	0.105906	1.66761e-05	0.142732	2.68147e-05	0.128075	0.000101092							0.127701	3.16024e-16
Atp1b3																																													0.0421357	0.00910246	0.189464	0.000672087
Atp23															0.17341	0.00390316					0.136215	0.00796517									0.129773	1.29281e-06					0.0853937	0.00129755							0.0457683	3.19103e-05
Atp2a2													0.0545026	0.000137894	0.22024	0.000320168	0.193698	0.00532128													0.185071	7.39534e-09	0.110676	8.4276e-07											0.0918882	8.00566e-13	0.17724	0.000147784	0.161663
Atp2a3													-0.0742476	8.57627e-05			-0.172065	0.000541172															-0.0764395	0.00144245											-0.064526	8.57661e-06
Atp2b1
Atp2b4	-0.140409	0.000271923			-0.16632	0.00364672							-0.117693	1.16609e-06																			-0.0868026	0.00494805											-0.0859171	1.61429e-06
Atp2c1													-0.0436765	0.00126963
Atp5b													0.0687748	0.00146977
Atp5c1																																	-0.101879	0.000716233											-0.064921	8.14434e-05
Atp5d																																			0.080534	0.00284661	0.136812	1.88758e-05							0.0794304	5.86331e-08
Atp5e	-0.135342	0.000284737																															-0.0805228	0.000545473
Atp5f1	0.170945	9.74165e-07	0.214045	2.21463e-10	0.173116	0.000122145							0.193005	3.45668e-25																	0.101649	0.000408394	0.118806	6.16664e-06	0.133817	2.01648e-06	0.125746	0.000248801							0.129147	1.7783e-19
Atp5g1	0.172028	8.02411e-08	0.141016	0.00396945	0.210342	9.18371e-07							0.194556	7.1775e-21	0.326767	1.56243e-10			0.291303	7.37807e-05											0.233174	3.62018e-16	0.138557	3.03812e-08	0.109607	0.000623972	0.251266	3.5922e-17							0.169175	3.33944e-29
Atp5g2	-0.101578	0.000806718																															-0.0616178	0.0043779
Atp5g3													0.122346	1.45189e-07	0.201992	0.0041565															0.102668	0.00485544					0.10414	0.000596573							0.0752345	3.30744e-07	0.186204	0.00253799
Atp5j													0.0851406	1.29629e-05																															0.0564325	0.000540819
Atp5j2																																					0.117499	7.3668e-05							0.056154	0.00097828
Atp5o-1	0.138455	1.72291e-05			0.150704	0.00230509							0.149362	2.46203e-12																			0.112712	0.00185036	0.0994921	0.00724357	0.14527	3.66589e-06							0.123024	1.08127e-12
Atp6ap2																															-0.0895	0.00661766	-0.074096	0.00572293											-0.0578747	0.000157901
Atp6v0a2																																	0.04344	0.00134869											0.0217687	0.0015869
Atp6v0b																																															-0.126235	0.00604306
Atp6v1a
Atp6v1d													-0.0862616	0.000162466																	-0.105186	0.0033312	-0.0791258	0.00333376											-0.0693091	1.79097e-05
Atp6v1g2													-0.0347848	0.00102517
Atp7a
Atp8a1
Atpaf1																																	0.0403633	0.00334015											0.0346795	2.31828e-05
Atpaf2																																					0.0598306	0.00846144
Atpif1	-0.199221	2.12093e-07											-0.118264	6.15203e-07																			-0.194933	4.17471e-12	-0.148042	6.61128e-07	-0.113199	0.00166424							-0.149891	2.14766e-21
Atraid													-0.0837508	0.00023356																					-0.0793296	0.00889843									-0.0790015	9.18355e-07
Atrip																																	0.0486485	0.00750595											0.0299161	0.00319896
Atxn2																															0.111416	9.41698e-05													0.0359766	0.0095575
Atxn2l													0.0366027	0.00842797
Atxn7																															-0.0812467	0.00488759
Atxn7l1			-0.144457	0.000170555									-0.0933319	1.3891e-07			-0.140642	0.00780501													-0.124238	7.71311e-06													-0.0463405	0.000838897
Atxn7l3													0.053127	7.48991e-05																			0.0496874	0.00276057											0.0376394	0.000247943
Atxn7l3b	0.133483	0.00240511											0.0997658	2.70282e-06																															0.0506314	0.00851312
Auh																																													-0.0337076	0.00933083
Aunip																															0.0705213	0.00915493
Aup1	0.0869448	0.00651675											0.0608124	0.000233593
Aurka
Aven
Avl9	-0.109543	0.00656901											-0.122514	4.03389e-07	-0.163462	0.00657366															-0.123912	4.737e-05	-0.131837	2.76593e-06			-0.229917	4.07408e-11							-0.14355	1.04543e-17
Axin1													0.0490041	8.92213e-05																															0.0351462	0.00416833
Azin1	0.0856341	0.00357342											0.0777973	1.13798e-06																	0.12352	0.000183042	0.0914993	6.87953e-07											0.0622725	1.44283e-08
Azin2																																													-0.0221306	0.00105649
B230118H07Rik																	-0.207612	0.00258228													-0.147324	5.97613e-06	-0.0893069	5.58859e-06	-0.085725	0.000187727									-0.0825872	2.68645e-12
B230219D22Rik													-0.0661956	0.0047144
B2m	-0.157333	3.89804e-12	-0.137012	3.45402e-07	-0.135526	5.15983e-06							-0.153725	2.98374e-31	-0.232146	1.57946e-06	-0.181178	2.88197e-05			-0.234419	1.10772e-05									-0.196244	9.35535e-19	-0.237123	1.04037e-54	-0.192165	2.81649e-26	-0.178288	1.67093e-20							-0.208536	2.83454e-106	-0.252276	4.82784e-10	-0.174582
B3galnt2															0.146054	0.00525456															0.0784107	0.00169238
B3galt6																									-0.0827156	0.00596986							0.0437783	0.00643734
B3gnt5																															-0.0677596	0.00460344
B3gnt8													-0.0277191	0.00777612
B4galnt1													0.0486657	0.00138964																	0.123057	0.000799876
B4galt1
B4galt6													-0.0418739	0.00802806																															-0.0394021	0.000540819
B4galt7																									0.00159396	0.00601444
B4gat1	-0.0389567	0.00491796											-0.026354	0.00781484
B930036N10Rik																															-0.039461	0.00421405
B9d2															-0.206919	0.00288498															-0.153808	5.60727e-06
BC003965													0.0553672	0.00181304	0.231892	0.000235824															0.13142	3.52276e-05	0.0942379	8.32381e-05											0.0794492	6.71296e-10
BC005537	0.0523779	0.00525447																																											0.0533252	0.00327579
BC005561	0.102706	0.00224823			0.153103	0.000340286							0.105788	7.41441e-08																			0.0651276	0.0096468			0.135789	3.40538e-06							0.0882885	3.06639e-10
BC028528	-0.0997554	0.00197169											-0.0929617	2.57307e-07																	-0.151502	4.14551e-06	-0.108423	1.75515e-07	-0.110864	3.74835e-05	-0.0879791	0.00385472							-0.102018	1.00137e-15	-0.235528	7.95107e-05	-0.208909
BC052040																									0.00316027	0.00674134
Bace1																																													-0.0312167	0.000943126	-0.0890035	0.00353083
Bach2																																	0.0457903	0.00244187			0.07387	0.000725414							0.0517627	1.79244e-09
Bag1													0.0706906	0.00864755																	0.0919191	0.00884675	0.110592	0.000660118			0.120277	0.00176467							0.0969713	3.91271e-09
Bag2													0.026187	0.00894139			0.210086	0.00386247													0.135401	5.3012e-07	0.0542867	7.67756e-05			0.0689819	0.00574467							0.0563245	3.50692e-09	0.235233	0.000503811	0.204327
Bag3													0.0329474	0.000861509
Bag5													0.055324	0.000337665																	0.134689	1.21562e-05			0.0796074	0.00440622									0.0677809	1.64746e-06	0.191788	0.000126915
Bahcc1													-0.0409189	0.00114838																	-0.0742612	7.44962e-05
Baiap2
Bak1																																			0.0762929	0.0011358									0.0516059	0.000189039
Bambi																																													-0.0313289	0.00213728
Banf1													0.0919317	0.000308633																			0.112594	4.29836e-05	0.112248	0.00317673	0.154842	2.24271e-05							0.140117	2.36717e-15	0.195624	0.000290087
Banp	0.0913761	7.79906e-06											0.0535869	0.000221311
Basp1	0.438579	3.47685e-30	0.330072	1.77806e-16	0.389518	3.36161e-19							0.383555	1.06863e-66	0.276221	0.000195788	0.239515	0.00758707	0.402209	7.91489e-06	0.394522	0.000265853									0.321728	3.03651e-20	0.270773	2.30371e-26	0.181003	2.90938e-09	0.248056	5.2826e-13							0.23826	9.81944e-50	0.242782	0.000920841
Batf	0.119163	6.04036e-06	0.0622779	0.00423425									0.0888353	2.13315e-07			0.218384	0.000154456			0.229205	0.00458166									0.150727	1.39809e-05
Bax																																			0.093256	0.00207937	0.114252	0.00388964							0.0835454	2.27681e-07
Baz1a	0.148746	3.38643e-08	0.114118	1.66864e-05	0.141498	3.18807e-05							0.147382	3.78609e-23	0.283328	6.27619e-05	0.306846	5.99621e-05			0.24827	0.000186496									0.292402	1.29321e-17	0.0856168	1.0114e-05	0.120937	6.199e-08	0.156832	2.54432e-12							0.122881	3.25705e-26	0.267651	0.000138547	0.195711
Baz1b													0.0529151	0.0082924	0.249329	0.000450435															0.19548	2.58083e-07	0.115744	0.000286757			0.145166	4.95284e-07							0.101278	1.69075e-09			0.286478
Baz2b	0.133343	0.000700971											0.0733435	0.000623542																			0.0218397	0.00887781											0.0144125	0.00473916
Bbc3																																	0.0464533	0.00933382
Bbs4													-0.0341506	0.000208525																			-0.0332403	0.000348234											-0.0366271	4.49204e-07
Bcap29															0.254075	0.000559925															0.137333	0.000557157	0.0883482	0.00174094											0.0663416	3.44241e-05
Bcap31																																	-0.0579638	0.00276057
Bcas2													0.0584841	0.00432219																			0.0315639	0.00510653											0.052016	0.000103438
Bccip			0.121018	0.00131159									0.0776914	0.000520043																							0.109364	0.00249038							0.074316	9.27513e-06
Bcdin3d																															-0.0590892	0.00704437
Bckdha																															-0.161919	3.69043e-09													-0.0500644	0.00121744
Bcl10													-0.0607893	0.0027914																	-0.131182	4.21917e-05	-0.0889817	0.000630995											-0.085759	2.70154e-08
Bcl11a			0.0959951	0.000376322									0.0833777	5.72948e-05			0.366433	7.60665e-07			0.300467	0.00523713									0.235201	1.62231e-09	0.103489	0.00337406	0.0868378	0.00179593	0.111769	0.00908426							0.0992751	1.32904e-09
Bcl2																																													-0.0529914	0.00213026
Bcl2l1																					0.138603	0.00825629
Bcl2l13													0.0195543	0.00694308
Bcl3	0.134131	1.92774e-13	0.205795	2.46825e-17	0.183267	1.1809e-13							0.171897	2.65374e-48	0.193272	1.16888e-05	0.183077	4.9719e-08			0.312321	1.26914e-12									0.207356	3.78443e-27	0.0724807	4.59475e-09	0.0829656	1.61337e-05	0.0909149	3.74249e-08							0.0833775	3.19169e-25	0.1363	0.00314095	0.162803
Bcl9l																															-0.0644454	0.00735342
Bclaf1													0.0790542	0.000194927																															0.0560104	0.00793396
Bdh2																																	-0.0555381	0.00115504											-0.0449613	2.64375e-06
Bdp1	0.0944955	0.00110117											0.0786885	2.00792e-06																	0.134184	5.6459e-06													0.050046	0.000388678
Bend3																															0.0309771	0.00847729															0.0677258	0.0057248
Bend5																									-0.0472816	0.00439516
Bend7													0.0314619	0.00964589
Bet1	0.121749	2.80377e-06											0.0728545	1.44932e-08																			0.114937	9.2603e-13			0.0926562	0.00239937							0.0948513	1.58834e-15
Bex4																																													-0.0727284	0.000288456
Bfar													0.0638502	0.000699536	-0.179907	0.00786208																													0.0629028	0.000114698
Bgn																																													-0.0489098	3.10671e-05
Bhlhb9																																													0.0275671	0.00352524
Bhlhe40																					0.0720883	0.00821174											-0.044519	0.000970788											-0.0329887	0.000270799
Bicd2													0.0329552	0.00462186
Bicdl1													0.0336424	5.85816e-05							0.0840071	0.00538932									0.0611504	6.31253e-05	0.0292957	0.00116358											0.0265422	1.42207e-05
Bin1															-0.25386	0.0002564															-0.141139	5.49943e-06
Bin2													0.0515296	0.00800881																			0.0656278	0.00981898			0.104261	4.70967e-06							0.0764657	1.50669e-08
Birc2
Birc6													0.0760948	0.000803835																			0.0804457	0.000742711											0.0497349	0.000396991
Blcap																									-0.0587579	0.00647896
Blmh			0.0888564	0.00341755									0.0390705	0.00175283																															0.0481282	0.00666775
Bloc1s2																															-0.125689	0.000127949
Bloc1s5																			-0.100852	0.00879188
Blvra																																	0.0319083	0.00856919	0.0580946	0.00112856									0.0286663	9.01914e-05
Bmi1																																	0.0160497	0.00690137
Bmpr2																																			0.0243597	0.00188721
Bms1													0.0654886	0.000207702																	0.087484	0.00548858													0.039454	0.00227829	0.171179	0.00922121	0.180903
Bmt2																															-0.0646012	0.000300562
Bnip3																																	-0.0453173	0.00338531											-0.0293706	0.00181002
Bnip3l													-0.0776926	0.00385159	-0.1857	0.00848781															-0.174769	1.08399e-06													-0.0755741	0.000132375	-0.22678	0.000649422
Bod1	0.098114	0.00436366											0.0618964	0.000326784
Bola2													0.104049	2.7091e-06																			0.118187	0.00060125			0.104898	0.00242034							0.10703	7.5656e-10
Bop1	0.0863868	0.000124876			0.0977459	0.00100115							0.0940649	1.83071e-12	0.190499	0.00213444															0.112848	7.09167e-06	0.160225	6.78196e-16			0.104268	1.03754e-06							0.111374	2.76204e-25	0.206435	0.000609852
Bphl													-0.0680035	0.000137664																			-0.0613976	0.0030882	-0.113268	1.39639e-05	-0.114927	2.88724e-05							-0.0931712	7.10002e-14
Bpifc
Bptf																															-0.116321	0.000317137
Brap																																	0.0478196	0.00251806											0.0333633	0.0074713
Brd1																															0.127287	0.000490672			0.110067	0.00199343									0.0592492	0.000926717
Brd3																																													0.0661926	0.000102812
Brd4	0.162043	2.10969e-05	0.205756	4.93416e-06									0.173786	5.68761e-15																	0.105114	0.00771218	0.133489	1.11605e-06	0.0927065	0.0071286	0.134626	0.000649045							0.118748	4.01257e-13
Brd7			0.120534	0.000851727									0.0896355	1.22224e-05																							0.0941386	0.00363127							0.0666253	2.22221e-06
Brd8																															-0.111813	0.00763188
Brf1																									-0.0662838	0.00328549
Bri3	-0.171205	9.15538e-05			-0.163092	0.00312222							-0.149094	3.66832e-10																							-0.0795606	0.0057214							-0.0683309	2.51856e-06
Bri3bp													0.0528946	0.00167573																	0.121819	0.00126118	0.0879019	0.000647279			0.0931855	0.0021184							0.0878031	3.49899e-11
Brix1	0.145207	2.28645e-05	0.139357	0.000574854	0.158087	3.58013e-06							0.15962	2.5206e-18	0.246479	9.24573e-05	0.25854	3.8042e-06	0.33268	1.33415e-05	0.303003	0.000889769									0.277323	1.91359e-20	0.0762524	0.00469875			0.0937968	0.00278747							0.0729948	1.25279e-06	0.176016	0.00858107	0.189119
Brk1																																													0.0267728	0.000864399
Brms1													0.0571769	0.000774991
Brpf1																																																	0.068362
Brwd1	0.0997776	7.21886e-05											0.0776633	8.33239e-08																	0.090972	0.00124414	0.0453768	0.00185531											0.0418587	7.52522e-05
Bscl2	-0.0838672	0.00822156																													-0.11137	0.000835541	-0.0689792	0.00960522											-0.0523466	0.00101919
Bsdc1	-0.0492282	0.00758013
Bsg													0.0627584	0.00317627
Bst2
Btaf1													0.0371157	0.00664815																															0.0385583	2.92533e-05
Btbd1			0.123835	0.00234865									0.0878844	7.82071e-06	0.176298	0.00339616															0.153598	8.44804e-08	0.0997012	3.65701e-05											0.06738	1.73955e-06
Btbd19													0.0236599	0.00329353
Btbd2																																															-0.120515	0.00752653
Btbd9			0.104457	0.00607167									0.0561558	0.000240365
Btc					-0.0499178	0.000339263							-0.0319978	2.74584e-05
Btd																									-0.0289696	0.00321178
Btf3	0.0929807	4.99179e-05											0.0596293	5.01e-05											-1.43024	0.000269815					0.063846	0.00492685	0.095427	3.11737e-09			0.0780708	0.00298078							0.08224	2.34998e-15
Btg1	-0.145326	0.00198041			-0.202164	0.0010843							-0.13735	3.96787e-07	-0.194689	0.00245967	-0.197829	0.000511079			-0.264954	0.00845971									-0.186478	3.13724e-08	-0.153134	3.0385e-06			-0.136271	0.00520003							-0.138276	1.24655e-11
Btg2			-0.202991	0.000779093	-0.234454	0.000114529							-0.165222	2.91713e-09	-0.397898	2.68164e-09	-0.286135	1.56727e-06	-0.475378	0.00017319	-0.521687	3.29273e-08									-0.43248	1.01593e-31	-0.122712	6.87287e-07											-0.0982832	2.43586e-08	-0.351927	3.77514e-06	-0.270954
Bub3													0.0818233	0.00136292																			0.104003	4.22153e-06	0.102621	0.00450073									0.107833	1.84429e-11
Bud23																																													0.0453081	0.00111967
Bud31													0.0753808	0.000322014																					0.0840483	0.00265129									0.0649968	7.6417e-06
Bysl	0.148576	1.7388e-09	0.0844672	3.4469e-05	0.137988	2.97472e-07							0.13743	1.87721e-27	0.304539	1.61884e-09	0.186583	0.00142573			0.201267	2.68386e-05									0.220482	7.34353e-18	0.107061	3.10448e-10	0.0639925	0.00109309	0.0783066	8.38771e-05							0.0895081	4.51912e-22	0.196345	0.000465277	0.199376
Bzw1	0.159373	9.18119e-06	0.159027	0.000376322	0.180035	0.000600994							0.176323	2.28859e-16	0.228134	0.000280511	0.210653	0.000613966	0.373914	1.36274e-07	0.235054	0.00342028									0.267309	4.04206e-20	0.203685	3.0866e-15	0.109176	0.00138398	0.242076	3.30855e-14							0.186044	1.22877e-33			0.222303
Bzw2													0.0711084	0.000180842	0.203446	0.00509946	0.239533	0.00207111													0.201615	3.76085e-09	0.093199	8.2159e-05	0.126875	3.24043e-05	0.175609	1.29909e-06							0.144821	2.859e-18	0.302033	1.15102e-06
C030034L19Rik															-0.145571	0.00060839															-0.09385	1.57867e-08															-0.17301	7.83181e-06
C1d													0.0733502	0.000347413																			0.0612147	0.00610354											0.0336127	0.000452298
C1qbp	0.214529	2.05461e-10	0.167895	0.000210329	0.194285	1.01414e-06							0.21786	2.11703e-26	0.4235	7.19791e-14	0.214049	0.000432351	0.270592	0.000744719	0.316119	0.000939367									0.322959	2.69001e-26	0.19542	1.53475e-14	0.197718	6.78305e-13	0.228339	3.18587e-14							0.221817	1.27342e-47	0.432395	2.91444e-17	0.175223
C1qtnf12	-0.121817	0.000178407											-0.0666947	0.000306811																															-0.0581525	2.1845e-05
C1qtnf6
C1ra													-0.0273155	0.00596464
C1rl													-0.0427109	0.00544561
C230037L18Rik													-0.0199161	0.000846745																					-0.0521453	0.000894136	-0.0594144	0.000234388							-0.0440443	8.04261e-10
C2cd5																															-0.0945718	0.00403763
C330018D20Rik																																													-0.0204515	0.004099
C920006O11Rik
CAAA01118383.1																																			0.0687402	0.00632501									0.0371263	0.004717
Cab39	0.0651915	0.00254156	0.0840331	0.000406507									0.0803432	3.44893e-09																			0.108116	2.45818e-07											0.0804345	6.71296e-10
Cab39l																									-0.136248	0.00354966																			0.0300749	0.00752346
Cables1	-0.0292685	0.00664284											-0.030037	0.000153681																			-0.0360731	0.00249177	-0.0583944	2.8168e-05									-0.0355477	5.14725e-08
Cacnb2	0.074339	0.000972886											0.0604813	6.31518e-06	0.191614	0.000959905	0.15892	0.000231819													0.168753	1.16207e-12	0.07397	1.89564e-05			0.0833161	0.00271574							0.0626777	1.27721e-08	0.222894	8.6864e-07	0.116339
Cactin													0.0401601	0.00540256
Cacybp	0.356134	7.21406e-24	0.219594	2.67359e-08	0.129536	0.00494312							0.256904	3.14571e-37	0.435336	4.63692e-17	0.386502	4.48201e-10	0.313595	3.64763e-06	0.478351	8.22791e-08									0.394335	2.50117e-42	0.276559	2.33942e-27	0.158773	3.81336e-08	0.19594	4.41888e-10							0.223786	2.58736e-49	0.530688	7.0036e-27	0.42272
Calcoco1													-0.039106	0.00230646																	-0.0604633	7.94986e-05	-0.0308477	0.00597667			-0.0704762	0.00207088							-0.0392311	2.77455e-05	-0.101639	0.000644154
Calhm2													-0.0417246	0.000564492																							-0.0532764	0.00119309							-0.0412495	4.36417e-07
Calm2																	-0.169659	0.00758978													-0.132361	5.56608e-05
Calr																																	0.16792	4.38168e-10			0.11437	0.000482929							0.134565	3.50786e-18			0.195037
Calu													0.0277014	0.00503137
Camk1																																													0.0212567	0.00422709
Camk2d													-0.0116256	0.00711842																															-0.0584186	0.00236655
Camkk1																															0.0524205	0.00071132
Camkk2																																													0.0551917	0.00012714
Caml													0.0407924	0.000286727
Camta1	0.0804318	0.00125431											0.0490533	0.00316233																			0.0629526	0.0023688			0.0790258	0.00176143							0.0547277	2.12602e-06
Cand1													0.0745814	6.25867e-05																	0.0974677	0.000610885													0.0561459	9.11418e-06
Cand2			-0.0792851	0.0035712									-0.0463313	0.00110948
Cant1																									-0.0468955	0.00198723
Canx	0.167814	0.000358702											0.104291	7.42059e-05	0.24299	0.000100565															0.203896	6.73834e-09					0.108141	0.000474445							0.103293	1.61679e-09	0.262707	1.5568e-05	0.284032
Capg													-0.0786964	0.00602346																			-0.107251	0.00290308											-0.069993	0.000414166
Capn15																															0.0843823	7.94228e-05	0.0431936	0.00371877											0.0444735	1.88426e-05
Capn5	-0.0605903	0.00205127											-0.0394226	0.000890305
Caprin1	0.182572	5.2973e-05	0.169267	0.000232872									0.159415	8.62206e-12																	0.110881	0.00397047	0.216435	7.68162e-13	0.184202	7.23539e-09	0.198841	2.0527e-09							0.204265	4.97849e-33
Caprin2																																																0.000299881
Capza1																																			0.100206	0.000677395									0.0682444	3.15084e-06
Capza2	0.0998541	2.66048e-06											0.101389	2.27403e-10			0.286193	1.24112e-05													0.121923	0.00026811			0.0883883	0.00918184									0.0642404	0.00031606
Capzb													0.0634027	0.00661615
Car2			-0.158788	0.000413811									-0.105915	1.255e-05																			-0.101541	0.00159623	-0.156067	3.00979e-05	-0.152509	0.000154087							-0.130819	6.17506e-13	-0.327795	4.84633e-05
Car9																																			-0.0312202	0.00102276	-0.0325198	0.0075362							-0.0251603	1.7653e-06
Card19	-0.163987	6.88326e-05			-0.183525	0.000309767							-0.149301	1.35079e-10	-0.174502	0.00845581					-0.292038	0.00897063									-0.167079	1.18488e-06	-0.134569	1.52274e-05											-0.0767835	3.19023e-05
Carhsp1																					-0.154101	0.00301195
Carm1																															0.0837406	0.000836627													0.0402155	0.000171404
Carmil2																																													-0.0239744	0.0021778
Carnmt1													0.0818229	7.04155e-05																			0.0660269	6.84183e-05			0.0781364	0.00122257							0.0623098	8.46799e-08
Cars	0.225483	1.12888e-21	0.140404	2.3351e-08	0.212364	5.25591e-14							0.197165	7.02725e-48			0.152613	5.85406e-05	0.292354	0.000191073	0.20267	0.00181354									0.190128	2.31846e-16	0.192315	2.23157e-28	0.0814575	1.43296e-06	0.106408	7.70848e-08							0.140382	6.67757e-47			0.149792
Cars2													0.00855651	0.00627229
Casc3																																	0.051078	0.00248923											0.0488359	3.07221e-06
Casc4																															0.0621058	0.00268768													0.0251092	0.0075885
Casp3													-0.0766951	5.4592e-05																															-0.0451	0.00315786
Casp4			0.135309	0.000727284									0.0893255	8.23869e-06																	0.102745	0.000138796	0.117274	7.44358e-08	0.0896998	0.00320714	0.100901	0.00265617							0.10309	1.97021e-12
Casp6	-0.0714113	0.0042635																															-0.0601744	0.00272266			-0.0930034	0.000466191							-0.0632869	9.39983e-08
Casp8																																													-0.0516946	0.0042436
Casp8ap2															0.184828	0.00574711															0.134883	0.00122336
Cast
Cat													-0.0932181	2.62943e-06																			-0.101897	1.45636e-05	-0.0905762	0.00302176									-0.0996566	2.31872e-12	-0.193284	0.000965465
Cav2			-0.0722853	0.00929745									-0.06154	8.44817e-08																	-0.0341114	0.00300903	-0.0300689	0.00737041											-0.0379476	2.01053e-06
Cavin2													-0.0676926	4.27251e-05																			-0.0786114	3.64888e-05											-0.0789986	7.8382e-10
Cavin3	-0.116137	0.000779144											-0.0873962	3.14171e-05																			-0.0863455	0.00443706											-0.0701703	3.33378e-05
Cbfa2t3	0.165397	2.73761e-05	0.171203	0.000125343	0.196549	0.000530766							0.166917	6.06908e-14																			0.112632	0.000194582	0.179916	5.51743e-08	0.127746	0.0014412							0.134814	6.13e-15
Cbfb	0.132404	0.000104919											0.105213	8.1113e-08	0.218868	0.000982156	0.208296	0.00490869													0.195181	1.24953e-08	0.0855785	1.35793e-05											0.0573254	3.09469e-07	0.213186	0.000268422
Cbr1	-0.142301	4.03756e-05											-0.104473	9.77071e-07																	-0.0718501	0.00155594	-0.0992746	0.000178646	-0.114619	0.000724826	-0.0972926	0.00882383							-0.108291	1.37487e-12
Cbr4																															-0.0557741	0.00288389
Cbx3
Cbx6																															0.0790082	0.00802771
Cbx7													-0.0415828	0.0081664																															-0.0356841	0.000703722
Cby1	-0.0580463	0.00163544											-0.0524792	2.33018e-07																	-0.078525	0.0015386	-0.0331083	0.000959287											-0.0316905	7.30199e-06
Cc2d2a													-0.0236191	0.00566402																															-0.0184626	0.00579141
Ccar1	0.127977	0.000368088	0.191059	2.33719e-05									0.13531	1.47765e-09																	0.128635	0.00189435	0.17146	4.07564e-10	0.138693	0.000103546									0.144769	2.679e-17
Ccdc112	0.125278	2.70322e-06	0.143822	0.00256084	0.155711	2.8979e-05							0.139521	2.15715e-15
Ccdc115	0.161623	9.1784e-08	0.101558	0.00468349	0.181141	1.08741e-05							0.160047	9.39435e-20	0.245362	0.000264411			0.179437	1.32702e-05	0.292459	0.0012494									0.21288	3.47064e-13	0.173514	2.47811e-12	0.0932714	2.909e-05	0.159921	8.02406e-08							0.152705	7.16822e-28	0.265304	1.98951e-05	0.185352
Ccdc12																																													0.0631402	1.39147e-05
Ccdc122													-0.0381982	0.00709816																	-0.0653895	0.00139484	-0.0450381	0.000362361			-0.0671258	0.00105963							-0.0557489	1.42905e-10
Ccdc124	0.106042	0.00115411											0.0767204	6.53892e-06																			0.0741371	0.00039924	0.0530811	0.0061094									0.0637224	1.04416e-08
Ccdc125	-0.0447884	0.00546602											-0.0429496	1.25619e-05																	-0.079179	2.84508e-05													-0.0304092	3.32335e-05
Ccdc127																															0.0695409	0.00606685
Ccdc134													0.0285453	0.00921387																	0.0538653	0.00514969	0.0347012	0.00692315											0.0211669	0.0048899
Ccdc137																																													0.0293042	0.000591188
Ccdc15																																													-0.0158178	0.00453017
Ccdc163			-0.0220293	0.0021413
Ccdc167																									-0.014556	0.00699287					-0.0425844	0.00382882
Ccdc173																																	-0.0266643	0.00641914											-0.0305469	2.25507e-06
Ccdc18													-0.0254969	0.0099933																	-0.0751818	0.000534598	-0.0380409	6.88414e-05											-0.0242064	3.93051e-05
Ccdc181													-0.0328721	0.00980532
Ccdc191																	-0.124694	0.000953268													-0.0593471	0.00830833													-0.0434602	1.56065e-05
Ccdc25	0.102974	2.28495e-05											0.0664109	1.99834e-05	0.170207	0.00274237	0.156127	0.00402606													0.126933	1.1133e-06
Ccdc28a					-0.0967719	0.00448545							-0.0640215	9.87215e-07																	-0.0558104	0.000868644	-0.0552276	0.000423934											-0.0548312	1.00774e-07
Ccdc28b	-0.0730837	0.00795644											-0.0704819	2.3255e-05	-0.165734	0.00910696															-0.145084	2.42322e-08													-0.0485436	0.000218275
Ccdc34																															-0.183187	2.80271e-05
Ccdc51
Ccdc61													-0.032183	0.00818435																	-0.0542098	0.000116165
Ccdc69													-0.0564073	0.00527556																															-0.0425118	0.00500157
Ccdc73																																	-0.0204719	0.0090617											-0.0208398	0.000423181
Ccdc82
Ccdc84																									-0.0243847	0.00589521																			0.023141	0.00260959
Ccdc86	0.17603	5.30371e-09	0.12534	3.19354e-05	0.139634	0.00423486							0.155748	6.6563e-18	0.241416	0.000526256	0.245008	1.22707e-05			0.414192	1.78265e-09									0.262835	3.76995e-18	0.11762	1.69675e-06	0.0980126	1.26965e-05	0.114834	8.05436e-05							0.1184	1.9037e-18	0.206543	0.00227205	0.207179
Ccdc88a	-0.100002	0.00475364											-0.0814926	0.000266283																	-0.117735	0.00270634
Ccdc9													0.0688931	0.000135362																															0.0499908	0.000270751
Ccdc90b															-0.128199	0.0073632															-0.0847831	0.000406918													-0.0478866	0.000222453
Ccdc91													-0.049905	0.00329675																			-0.069112	3.50567e-05	-0.0672228	0.00171118									-0.057715	5.27404e-08
Ccdc94
Cchcr1
Ccl3															-0.342416	8.89752e-09															-0.17796	2.4493e-08
Ccl4	-0.137237	7.30872e-05	-0.285892	3.57046e-11	-0.338427	2.68038e-11							-0.248681	2.29363e-29			-0.226312	0.00324919													-0.197308	2.20546e-10	-0.071733	0.00177366	-0.133225	6.40646e-06	-0.177739	8.0018e-07							-0.135616	2.34623e-18	-0.223466	0.00208556
Ccl9																															-0.10482	0.000896959
Ccm2			-0.100612	0.0070754									-0.0601919	0.00133736																	-0.110683	0.000376038
Ccm2l																																	-0.037144	0.00101293											-0.0355192	3.37599e-05
Ccnd1	-0.155307	7.53617e-06											-0.0947317	4.51629e-06																			-0.0771163	0.00656647			-0.0778217	0.00199841							-0.0433694	0.00344079
Ccnd2																															0.151563	0.00122055	-0.103501	0.000245775
Ccnd3	0.198177	1.69183e-07	0.142755	0.00380668	0.164106	0.000505743							0.16839	3.34776e-15							0.394848	6.08949e-06									0.183967	4.08164e-08	0.114914	8.03252e-05	0.123827	0.000534242									0.0961464	3.89046e-09	0.235333	0.000504808	0.284347
Ccndbp1																																													-0.0443094	0.00777909
Ccng2	-0.0496057	0.000957442	-0.0630541	0.00913267									-0.060507	2.238e-08			-0.065994	0.000518608	-0.129272	0.00805738	-0.30777	5.541e-05									-0.140947	2.21364e-15					-0.0656284	0.00518279							-0.047895	2.34593e-07	-0.0908205	0.00158531
Ccnl1																																	-0.146912	3.59121e-07			-0.166037	2.05113e-05							-0.149951	1.15567e-15
Ccnl2
Ccnt1					-0.206851	0.0016072																											-0.14897	7.14482e-08			-0.28762	5.46598e-15							-0.161314	8.12633e-23
Ccpg1os																																			-0.0546553	7.0438e-05									-0.032983	7.65506e-06
Ccrl2													-0.04939	0.00232725																															-0.0498163	1.01069e-05
Cct2	0.169959	8.69711e-06	0.173312	9.54716e-06	0.155023	0.00191509							0.171497	2.25246e-17																	0.144073	1.97912e-07	0.114205	0.000145334											0.104526	2.64295e-11
Cct3	0.214753	5.70332e-09	0.20508	3.03931e-07	0.206129	5.70144e-07							0.22577	1.68625e-28	0.234105	9.01711e-07															0.172562	1.99202e-09	0.285146	7.21799e-34	0.192921	1.97323e-12	0.298963	6.60031e-23							0.268818	7.65644e-73	0.354904	2.71456e-12	0.204985
Cct4													0.0755011	0.00203823							0.187545	0.0079526									0.096356	0.00270587	0.0692888	0.000247854															0.161701
Cct5	0.2894	4.66121e-16			0.152094	0.00035322							0.185325	3.59884e-21	0.195045	0.00290748															0.142479	3.16424e-07	0.236728	4.12963e-23	0.137292	4.46848e-06	0.255481	8.67008e-17							0.213256	1.106e-48	0.246474	1.92633e-06
Cct7	0.132222	8.69986e-05	0.141052	0.00108967									0.13334	5.21908e-11	0.213954	5.39173e-05															0.13654	1.56223e-06	0.0813025	0.000371655	0.1035	0.00210647									0.098975	1.42905e-10			0.184543
Cct8	0.204157	1.10536e-09			0.201605	4.38378e-06							0.18499	4.12541e-21	0.257107	8.89273e-07	0.207287	4.32631e-05													0.209879	1.55099e-14	0.182648	2.3639e-14	0.155136	2.79946e-07	0.240669	2.14562e-14							0.202636	2.65589e-41	0.327142	2.21978e-11	0.216602
Cd180																															-0.0538302	0.00323861
Cd1d1																																	-0.074618	2.87417e-05	-0.0746467	0.00302261									-0.0732195	1.28939e-10
Cd200																																													-0.025702	0.00144108
Cd200r1																																													-0.0277739	0.00961872
Cd244
Cd24a	-0.158578	0.00154211	-0.244448	1.62301e-06	-0.258617	3.0732e-06							-0.223449	5.29941e-18																	-0.172113	1.74218e-05	-0.165066	1.7092e-06			-0.165953	9.53145e-05							-0.125419	2.01205e-10
Cd27	-0.223718	1.97908e-09	-0.176921	0.000422494									-0.185888	5.25593e-16	-0.230689	0.00135355					-0.304103	0.00514559									-0.198187	2.03863e-07	-0.161737	3.23628e-09	-0.130769	0.000724221	-0.159996	4.69449e-05							-0.156775	4.47433e-20	-0.227623	0.00031679	-0.351212
Cd2ap													0.0579036	0.00184595																															0.0385629	0.00312411
Cd2bp2					0.0998395	0.00562028							0.0475257	0.000924248																															0.0337185	0.00357176
Cd300a	-0.0776449	0.000276091			-0.0939633	0.00802307							-0.0758124	4.63661e-08																	-0.0920903	0.000312263	-0.0700179	6.62092e-06	-0.0906864	0.000173515	-0.106545	3.24222e-07							-0.0870537	1.79028e-18
Cd320
Cd34															-0.248557	5.38796e-05															-0.171469	3.56873e-06
Cd37																																															-0.219542	0.00219252
Cd3eap					0.134695	0.00140377							0.106683	1.28666e-08	0.336811	7.55409e-07	0.263834	0.000909797			0.231997	0.00019777									0.262261	3.61472e-16	0.104077	4.53994e-06	0.0816937	0.00598191	0.121294	2.98744e-05							0.105547	3.06516e-15	0.246136	0.00019965
Cd44			-0.108548	0.00455777									-0.0636121	0.00220719
Cd47	-0.155532	0.000360682	-0.137783	0.00660327									-0.144491	5.40572e-10	-0.199743	0.00391772															-0.131917	4.32685e-05			-0.0962229	0.00235042									-0.0837909	1.81733e-07
Cd48																	0.278106	1.35147e-05			0.176115	0.00206671									0.200698	2.20454e-09
Cd53	0.135983	1.95773e-14	0.111214	3.23536e-11	0.108203	9.02762e-07							0.125085	2.67506e-35	0.283035	0.000125241			0.34568	0.000667199											0.260514	2.74427e-11	0.139851	1.81848e-27	0.101843	1.11343e-14	0.119314	1.64177e-10							0.122868	6.04916e-54	0.256743	0.00029229
Cd55																																													-0.0409182	0.00042457
Cd59a													-0.0381179	0.0039223
Cd63	0.176503	1.22523e-08	0.140582	8.34005e-05	0.152647	0.0010843							0.163775	3.33823e-19																			0.191035	3.98012e-16	0.104715	0.00024798	0.201569	6.27757e-12							0.162246	1.4568e-31
Cd69													-0.025652	0.00252174	-0.309944	0.00335169					-0.376846	0.00800944									-0.240583	4.1752e-07
Cd72													-0.0422061	0.000488202	-0.194537	0.00454397															-0.127209	1.28528e-05	-0.0451223	0.000181987											-0.0435345	4.04607e-09	-0.21924	1.32549e-05
Cd74																																													-0.0915677	0.00325102
Cd79b	-0.114538	2.55295e-05											-0.108168	3.23572e-10																	-0.117059	1.86424e-05					-0.087685	0.00454561							-0.0630768	3.10535e-06
Cd81	-0.127676	0.00119298											-0.0895801	2.75011e-05	-0.159158	0.00954232															-0.114278	0.000190543	-0.120152	1.43103e-05			-0.114282	0.000979299							-0.105239	5.30404e-12	-0.206637	0.000970128
Cd82																																													-0.056986	1.35153e-05
Cd84															-0.21607	0.0001769															-0.151729	1.2823e-07													-0.0525636	0.00300934
Cd9	-0.158181	8.71161e-05			-0.178699	0.00312468							-0.154987	4.62099e-10	-0.176519	0.00632411															-0.156756	5.3314e-06	-0.214181	2.59472e-12	-0.140586	4.11169e-05									-0.158064	8.83746e-19
Cd93	-0.183271	1.05314e-10											-0.14013	9.00868e-14	-0.341296	2.22422e-07					-0.569113	1.3063e-07									-0.319944	1.29384e-19	-0.0881068	0.000299848											-0.0875559	5.73756e-09	-0.26008	7.33401e-05	-0.261773
Cd96																															-0.0501029	0.00551399
Cd99l2	-0.0693286	0.000165126											-0.0424455	0.000775051
Cdc14a	-0.0465856	0.00665352											-0.0322492	0.0031793
Cdc16																																													0.0551219	0.00016826
Cdc23																																													0.0254873	0.0024086
Cdc25a													0.0421622	0.00176698																	0.146178	1.69574e-06	0.0774557	9.75598e-06	0.060796	0.00272133									0.0648286	3.40637e-11
Cdc26																																	0.108895	0.00138517											0.0875441	9.79813e-07
Cdc34	0.0834054	7.13859e-05	0.0992584	0.00364244	0.11943	0.000578136							0.104948	1.59656e-12																	0.144526	2.71572e-06	0.110779	1.06741e-08	0.0909924	5.78936e-05	0.0965327	2.76396e-05							0.104912	2.26666e-21
Cdc37l1													0.0694233	0.000582861																			0.098342	2.22718e-05			0.111592	0.000754615							0.0919876	1.64011e-10
Cdc40																															-0.111861	0.00397241
Cdc42			0.117468	0.0056853	0.133626	0.00689267							0.104218	7.05954e-07																			0.154733	3.60395e-09	0.103198	0.000905604									0.106401	4.06051e-13
Cdc42ep3	-0.135668	5.82532e-05	-0.186969	2.63864e-06									-0.142771	1.15929e-12	-0.209731	0.00413792	-0.195809	0.00196799			-0.293387	0.00129219									-0.220909	1.89005e-12					-0.128098	0.000239387							-0.0858585	4.65891e-08	-0.240606	0.000144782
Cdc42ep4																																													-0.020119	0.00722909
Cdc42se1	0.0778097	0.000670434											0.067254	3.52563e-06
Cdc42se2																																													-0.0563221	5.05835e-05
Cdc5l													0.0638117	0.00736317
Cdc73													0.0519723	0.00155444
Cdca3
Cdca7															0.203669	0.00109899															0.207572	2.39361e-07	0.0995508	0.00615614			0.161652	2.30623e-07							0.117031	6.23737e-12	0.280739	1.27346e-06
Cdca7l			-0.134414	0.00233978									-0.110232	1.59894e-07
Cdipt													0.0678509	0.000780164																															0.0480089	0.000200162
Cdk11b																																					-0.156271	0.000824791							-0.0764258	7.01643e-05
Cdk12	0.123909	0.000430454											0.0917258	1.35413e-05																			0.092965	0.00039776											0.0641884	9.99262e-05
Cdk13	0.094796	0.00569117			0.130768	0.00499962							0.10286	2.1156e-08																			0.0622207	0.00829931											0.047616	3.66884e-05
Cdk16	0.0726827	0.00440118											0.0407463	0.00456885																			0.0596099	0.000217019											0.0408382	6.34669e-05
Cdk17																																					0.0951847	0.00725636
Cdk18																																	0.0437472	0.00494742
Cdk19													-0.054112	0.000253179																	-0.107876	8.84089e-05	-0.0505413	0.00136197											-0.0508699	5.98072e-07
Cdk2ap1																																					0.0828023	0.00454561							0.0612496	4.43289e-05
Cdk2ap2																																	0.124304	1.45953e-05	0.0796857	9.6231e-05	0.0526111	0.00301588							0.0874677	6.65717e-12
Cdk4					0.122307	0.00707158							0.114368	5.81787e-08
Cdk5																																	-0.0355742	0.00680344											-0.0246025	0.00528983
Cdk5rap3													0.012731	0.00457498
Cdk6	0.137546	6.97904e-05											0.11091	2.22241e-10																	0.208651	4.33751e-08	0.171832	1.15371e-17											0.115778	6.15704e-24	0.305993	2.18613e-05	0.255434
Cdk7													0.0557682	0.00612433																															0.0379044	0.00408218
Cdk8																															0.0966146	0.00121305	0.0641612	0.000412216											0.0479088	2.56626e-05
Cdk9													0.0685153	9.0524e-05
Cdkal1																									-0.127621	0.00953934
Cdkn1a																																	-0.0539755	0.00933051											-0.0681993	7.39282e-07
Cdkn1b													-0.0649571	0.000291772																	-0.155608	2.03124e-07
Cdkn1c	-0.151721	0.000462713	-0.161986	0.00404635									-0.171835	4.88376e-12																			-0.10576	0.000296583	-0.167784	4.93118e-06	-0.138929	0.00049844							-0.150214	4.31621e-18
Cdkn2aip													-0.0832132	6.06571e-07																							-0.0915599	0.00515889							-0.0574272	9.82377e-06
Cdkn2c																															-0.0678865	0.00471316
Cdkn2d																																	-0.0748612	0.00605943			-0.136293	9.78622e-05							-0.07527	2.02405e-06
Cdt1																																															0.22661	0.00451506
Cdv3	0.332414	6.65634e-17	0.206182	1.06575e-07									0.250527	3.81509e-30	0.472863	3.70657e-14	0.502183	4.30207e-14	0.286926	0.00241347	0.360609	3.26177e-09									0.435528	6.79532e-44	0.285536	4.48467e-25	0.17056	1.98656e-08	0.320669	1.98306e-23							0.264602	1.70458e-61	0.360309	1.07011e-09	0.333003
Cdyl																																													0.0283152	0.00229041
Cebpa																															0.0675587	0.00532432
Cebpb	0.29606	9.55071e-09	0.172017	0.00233978									0.224892	5.55581e-13	0.399394	7.83382e-08	0.346828	7.73291e-06													0.322258	8.78444e-15															0.344706	1.16145e-07	0.359416
Cebpd																																	0.0352715	0.00206267	0.0532823	0.00362573									0.0333095	9.9229e-06	0.131793	0.00466827
Cebpg	0.0565888	0.000442651											0.0640491	2.00165e-05																			0.0835258	2.03462e-05											0.0408035	0.00199337
Cebpz	0.210547	1.1749e-07											0.157312	1.00319e-11	0.290047	2.32037e-05					0.278432	0.000994762									0.230813	3.32534e-12	0.121606	1.60128e-05											0.0995857	4.35429e-09
Cebpzos													-0.0632761	0.000806206																	-0.0664513	0.00510872													-0.0403207	0.00731418
Cela1																																					-0.0534987	0.00499996
Celf1																																													0.0707074	4.80418e-06
Celf2	-0.174857	0.00032985											-0.142568	5.81787e-08	-0.247144	0.000395098	-0.233624	0.00998587													-0.212815	4.53845e-10	-0.143991	3.80103e-05			-0.10348	0.00120345							-0.105257	1.99166e-08	-0.267101	0.000137874	-0.22655
Cenpa															-0.128312	0.00225589															-0.174406	0.000302033													-0.0416853	0.00252447
Cenpb																																													0.0497833	0.00722909
Cenpl																															-0.0549948	0.00473835
Cenpq																																													-0.0352221	0.0041258
Cenpt													-0.0806685	0.000105883
Cenpv
Cenpw	-0.0499298	0.00920107
Cep104																																													0.0188516	0.0079987
Cep19																															-0.082194	0.00169677	-0.0540686	0.000735279											-0.0436184	0.00040695			-0.0859155
Cep44																															-0.0904148	0.000310058
Cep57l1	-0.152278	3.4047e-10											-0.125402	5.52918e-14																	-0.128353	4.83223e-05													-0.057738	1.54128e-05
Cep72																															-0.0307063	0.00652305
Cep83																																													0.0200811	0.00608025
Cep85													0.0374025	0.002554
Cep97																																													-0.0381074	1.29246e-05
Cerk													-0.0470013	0.00292718																							-0.0768293	0.00317226							-0.0473292	2.00052e-05
Cers2	0.0944416	0.00909063											0.108052	4.58927e-06																															0.0622515	0.000705754
Cers4	-0.153532	0.000674409			-0.168164	0.00561701							-0.142238	2.27876e-08	-0.196987	0.00437516															-0.139497	5.65371e-05													-0.0799135	3.16518e-05
Cfap20																																	-0.0924309	0.000451795
Cfap43													-0.028155	0.00416402
Cfdp1																																													-0.0193087	0.00433488
Cfl1													0.0614592	0.0023423											-1.54255	0.00415161
Cfl2													-0.0131248	0.00961194
Cflar	0.107263	0.00297388											0.0694711	0.0010826																															0.0363465	0.0020315
Cggbp1					-0.0990612	0.00676816
Chaf1a
Chaf1b	-0.159247	1.19605e-06	-0.120967	0.00107305									-0.121226	8.12494e-11																			-0.11805	6.16633e-07											-0.0881686	5.19713e-10
Chchd1	0.145649	0.000780574			0.119651	0.000678427							0.133213	4.5184e-10																	0.117975	0.00131731					0.10281	0.00945232							0.0745664	1.80713e-06	0.123014	0.00123416
Chchd2			0.124095	0.00179661	0.142175	0.000440237							0.109805	3.40874e-10																			0.118815	5.00177e-10	0.0855934	0.000408306	0.146236	2.21873e-08							0.123686	1.41494e-22
Chchd4	0.178149	1.50143e-07	0.135611	0.000604563	0.147523	0.000376184							0.169096	5.82716e-19	0.371868	3.47613e-10	0.251838	0.000482725			0.443013	3.12677e-09									0.321541	2.99719e-23	0.115843	4.88054e-06	0.130053	2.12109e-06	0.126898	2.55639e-05							0.131656	1.34301e-20	0.231889	0.000174822	0.392706
Chchd5													-0.0565344	0.00365866																	-0.0774655	0.00596323													-0.0475947	0.000120901
Chchd7													0.095032	9.20143e-06
Chd1													0.0680143	0.00134426																	0.162312	3.25538e-06
Chd2													-0.103863	8.17371e-05	-0.258033	5.61981e-05															-0.187564	2.97048e-07			-0.158294	1.2503e-05									-0.109864	3.63504e-09
Chd4																																	0.119106	0.000501005											0.098078	8.13399e-08
Chd7	0.0807882	0.000680211											0.0679228	2.26155e-06																					0.0641065	0.00582978									0.0367833	0.000518614
Chdh																															-0.0199938	0.00901148
Chek1
Chek2													-0.0381001	0.000643537																															-0.0243757	0.00701157
Cherp															0.181977	0.00338883															0.106686	0.000239748
Chfr																									-0.0631315	0.00677867
Chic2																															-0.113168	0.00162426	-0.0801925	0.00765588											-0.0688447	5.87481e-05
Chid1																									-0.0644213	0.000941611
Chkb																															-0.0641808	0.00226916
Chmp2a													0.0687707	0.000825463
Chmp4b	0.268985	7.35637e-15			0.235906	1.63077e-07							0.214677	1.10437e-24	0.206598	0.00197786															0.153944	1.96926e-05	0.2229	3.65744e-22	0.162089	2.74728e-08	0.178983	1.77617e-09							0.191454	2.73091e-37	0.194239	0.00502114	0.143223
Chmp5													-0.0810448	0.000198603																	-0.113382	0.000617861	-0.0770311	0.00125327											-0.0701911	1.2479e-06
Chmp6																																	0.0429756	0.000627228											0.0495275	4.74043e-07
Chordc1	0.126566	0.000103888											0.0847106	3.68095e-05																	0.105481	0.00520963	0.0606204	0.000642286											0.059567	4.41381e-06
Chp1																																													-0.0397653	0.000522715
Chrac1																																			0.0881982	0.00314429
Chst11																									-0.0992756	0.0073308
Chst2	-0.0687249	1.06782e-05			-0.0693823	0.00134649							-0.0538853	3.21927e-09																			-0.0480287	8.14476e-07	-0.0496963	0.00384109	-0.0506483	0.00169653							-0.0497249	1.23622e-14
Chst7	-0.0347572	0.00119816											-0.0306146	0.000264229
Chsy1
Chtf8																																	0.0705438	0.00184388											0.0517334	2.48284e-05
Chtop	0.116674	0.000745386											0.100219	3.82429e-08
Chuk													0.05633	3.19092e-05																			0.0824681	8.13349e-09	0.0514332	0.00394458									0.0635541	2.15521e-12
Churc1																																													-0.065143	0.000158765
Ciapin1	0.107595	8.19722e-05			0.125137	0.000135501							0.0971777	2.2551e-10																	0.0827556	0.00598004	0.0953034	1.52598e-06	0.0885672	0.000388796									0.0895874	4.52153e-15
Cib1	0.040295	0.0029244											0.0417354	0.00189092																			0.0595703	0.00577545											0.0501823	6.52688e-06
Cic					0.120472	0.00479986							0.109278	7.79276e-08																															0.0486333	0.00321591
Cinp																															0.120894	5.75577e-05
Cir1	-0.0994851	0.00304842											-0.0990318	2.77701e-06																	-0.123139	0.000436712	-0.117978	7.11429e-07			-0.121077	0.00108835							-0.114675	8.32542e-14	-0.220711	0.000391029
Cirbp	-0.147885	0.00393592			-0.192972	0.000749099							-0.140741	1.74305e-07							-0.432903	0.00409213									-0.222409	6.90875e-09	-0.243707	3.7046e-17			-0.241789	2.13498e-10							-0.209307	3.48678e-31
Cisd1													0.0807673	0.000208189																	0.116988	0.0055767													0.0548237	0.00286622
Cisd2													0.0892827	9.98249e-05			0.29063	0.000691624													0.163404	2.71572e-06	0.0979672	0.00314473			0.0961466	0.00760797							0.0811422	1.72637e-07
Cish																																	-0.201491	3.66053e-20	-0.146538	2.79946e-07	-0.161088	1.98558e-06							-0.174237	3.42041e-34
Cit
Cited2	-0.190393	8.14487e-05											-0.168016	8.18445e-09	-0.303528	0.000260038															-0.233804	1.42048e-07	-0.197709	4.1885e-08	-0.193628	7.2851e-07	-0.183922	6.98809e-05							-0.204542	8.26549e-21	-0.24916	0.00632796
Ckap2l
Ckap4	0.120157	5.22826e-05											0.0986863	4.6873e-09																	0.10207	0.00178545	0.120922	1.43682e-10	0.0997045	4.3069e-05	0.11746	5.61176e-06							0.113959	3.09546e-23
Ckb																																													-0.0203727	0.00958757
Cklf																															-0.103865	0.000518004
Cks1b	0.117196	0.0017426	0.0937828	0.00988259	0.137492	7.75412e-05							0.123313	1.88979e-09																			0.102703	0.000500561			0.144644	3.19461e-07							0.104654	3.6207e-11	0.203566	0.00241975
Cks2
Clasp2	-0.0463499	0.0033785
Clcn5			0.096151	0.000196193									0.0570247	2.68874e-07
Cldn34c1																																													-0.017041	0.00133149
Clec10a																															0.0525278	0.00180807
Clec11a																				0.00455302											-0.0343076	0.00275423
Clec14a													-0.0289008	0.000714313
Clec1a	-0.114563	0.000113619											-0.111984	6.64936e-09																			-0.0668988	0.00838211	-0.0970329	0.00570127	-0.115423	0.00127284							-0.0957997	1.37966e-10
Clec2d	-0.267029	1.01388e-09	-0.250192	1.84603e-06	-0.175648	0.00224856							-0.255357	5.75041e-23	-0.21826	0.00401142			-0.29853	0.00484856											-0.193173	8.63005e-09	-0.296196	3.72562e-21	-0.27229	5.19551e-14	-0.1675	4.30018e-05							-0.247231	1.00461e-37	-0.221074	0.00116533
Clic1													0.0798627	8.92213e-05																					0.0785417	0.00123392	0.0926646	0.00734454							0.0747578	5.78025e-09
Clic4	0.0793158	0.0080901											0.0559369	0.00126531																															0.0471734	0.000273432
Clic5
Clint1	0.15757	2.94102e-05	0.0959439	0.00234439									0.0969383	2.01679e-07																			0.213864	1.99095e-16	0.121922	0.000231359	0.185909	1.47442e-07							0.179501	2.19606e-29
Clk1															-0.239628	0.000674696															-0.207131	3.84915e-08	-0.177722	4.70613e-07	-0.193418	5.96516e-08	-0.123471	0.0029538							-0.183754	4.22881e-21
Cln6	-0.0923994	0.000675337											-0.0666489	0.000178714
Clnk
Clns1a	0.11447	2.20449e-05	0.0419337	0.00494005									0.0961936	2.68726e-10																	0.118732	0.000994587	0.0926533	0.00446405	0.0883061	0.000311884	0.0562304	0.00170589							0.0862487	2.04238e-10	0.205302	0.00207118
Clpp	0.138018	0.000423374			0.126973	0.00192375							0.104593	2.82264e-08	0.215002	0.00283058															0.153459	8.82834e-06	0.124366	6.10286e-08	0.0766438	0.00405944	0.102327	0.00148298							0.107755	1.42042e-15	0.190317	0.00283508
Clptm1l																																	0.0811264	0.00381221			0.0814307	0.00377854							0.0755889	1.01904e-08
Clstn3																																													-0.0380976	0.00016965
Cltb	0.249603	3.95341e-11	0.240368	8.81061e-12	0.232705	2.55633e-08							0.250727	4.28205e-35	0.228038	0.00121127															0.201596	1.69318e-10	0.248165	2.73441e-19	0.225896	8.93493e-18	0.164328	5.6126e-08							0.214999	8.61015e-45	0.178718	0.00681972	0.220409
Cltc	0.145339	1.93918e-05	0.110842	0.0020598									0.0996809	3.39501e-06																			0.103473	0.000161416			0.125028	0.00112512							0.101876	1.08042e-10
Clu																																	0.0398822	0.00730755											0.0346792	9.91272e-05
Cluh													0.0449688	0.00138488																			0.0591414	0.00119192											0.0398664	1.8166e-05
Cmas	-0.179761	1.76252e-05	-0.139044	0.00712385	-0.212048	4.76938e-05							-0.185863	1.27932e-15	-0.209902	0.00134392															-0.211756	1.00689e-10					-0.136465	0.000824458							-0.103742	3.62269e-08
Cmc1	-0.167855	1.27972e-06			-0.164763	0.000203253							-0.141481	6.83196e-12																	-0.107044	0.000526485	-0.139805	6.56596e-09	-0.10548	0.00201212	-0.112035	0.00274525							-0.125386	7.95034e-17
Cmc4			-0.074947	0.00528222	-0.0841903	0.00942528							-0.0553978	2.98094e-05																															-0.041596	4.13351e-05
Cmpk1																																			0.0945959	0.00124098									0.0739481	2.07627e-07
Cmpk2																															-0.0529986	0.00763188															-0.130808	0.000147998
Cmtm7	-0.243521	7.10012e-09	-0.253601	7.78421e-07	-0.233816	4.56495e-05							-0.228482	8.58415e-20	-0.307959	4.96372e-08	-0.219398	4.21126e-05			-0.301794	3.33105e-07									-0.26219	2.36804e-20			-0.12825	0.00101297									-0.0745416	0.000143225
Cmtm8													-0.0360917	0.00265386																	-0.0481898	0.00875929	-0.0525717	7.64921e-05
Cnbp	0.283728	2.24384e-27	0.197571	1.46222e-07	0.305132	4.10456e-17							0.269165	2.07955e-53	0.244328	4.1112e-05	0.183641	6.82117e-05	0.285773	0.00037372	0.319366	8.48241e-07									0.251406	3.42597e-21	0.177032	8.57144e-19	0.170735	6.61778e-11	0.0866275	0.00737103							0.161796	9.72365e-35	0.328246	4.90712e-11	0.16488
Cndp2													0.0453155	0.00263096
Cngb1	-0.0621697	1.65767e-05			-0.0771027	0.00257545							-0.062536	1.71691e-10	-0.0520155	0.00706893	-0.0709135	0.00705472													-0.065946	2.85461e-07	-0.0383453	0.00127548											-0.0413888	5.94924e-08
Cnih1	0.103736	0.00150633											0.0744854	2.00794e-05																	0.104425	0.00412248													0.0494706	0.000799684
Cnih4	0.109974	3.84958e-06	0.147021	0.000454231									0.121196	7.21285e-10																															0.0513535	0.00215519
Cnksr3													-0.0414573	0.000118222																															-0.0288072	0.00151464
Cnn2													-0.0907818	0.00017868																	-0.101826	0.0055189	-0.106935	0.000448053			-0.152537	2.81918e-06							-0.110523	3.32233e-11
Cnnm3															-0.00669451	0.00274237
Cnot1																																	0.058169	0.00476903
Cnot4					0.115136	0.00251008							0.0783338	1.10959e-05
Cnot6l													-0.0822795	0.00108213																	-0.100273	0.00268274
Cnot7	0.0721248	0.00934413											0.0659713	0.006151
Cnot8																															-0.0871732	0.006553
Cnp	-0.0832611	0.00761566											-0.0735231	8.91568e-05																			-0.0588161	0.00609782	-0.0824588	0.00628103									-0.0551827	5.0869e-05
Cnppd1													0.0376497	0.000540482
Cnpy4																																	-0.0543916	0.00224927											-0.0385322	0.000452652
Cnrip1															-0.179832	0.00055855															-0.113959	1.56147e-05													-0.0624742	1.35461e-06	-0.258124	1.23813e-06
Coa3													0.0301899	0.00628565																			0.0952404	0.00261538											0.058841	0.000121356
Coa5																																													0.0138802	0.00372675
Coa7																															0.0687526	0.00233636	0.0537127	0.000229891											0.0397949	1.05079e-06
Cobll1																																													-0.026225	0.00058354
Cog1																																													0.0181638	0.00695742
Cog8	0.104317	0.00101727											0.0623385	0.00025941
Col16a1													0.0521897	0.000427912																			0.0763184	5.49971e-06			0.0932497	8.82006e-06							0.0623853	3.46244e-11
Col4a2																																													0.03887	0.0005567
Colgalt1													0.0623101	0.000389048																	0.144348	2.58086e-05													0.0599818	0.000254646			0.156459
Commd2	0.119908	0.000132147			0.126943	0.00695006							0.108258	5.81945e-10																			0.0698067	0.00462383											0.037633	0.000758743
Commd4																																					-0.117405	0.000425893							-0.0642167	7.10761e-05
Commd6																																	-0.0798511	0.000464383			-0.0889542	0.00464569							-0.048889	0.00268122
Commd7			0.128042	0.000264922									0.0742217	0.000787546
Comt																																													-0.0602934	0.000856648
Comtd1
Cop1													0.0610273	0.00306745																			0.0704386	0.00471758											0.0617381	7.81219e-05
Copa																																	0.134696	2.00054e-08											0.0720906	1.67004e-06
Copb1	0.146445	1.20784e-05			0.142287	0.00378388							0.124361	1.23786e-10																			0.170741	3.03124e-11			0.133918	9.53763e-05							0.12982	3.49028e-16
Copb2	0.124643	0.00141227											0.103405	2.20288e-07																			0.134761	6.75321e-08			0.150078	2.72303e-06							0.106096	4.28833e-16
Cope	0.16926	2.03689e-05											0.137983	2.92197e-10																			0.182226	3.18697e-11	0.070996	0.00592604	0.230488	1.32095e-13							0.165821	4.96461e-29
Copg1																																					0.0927041	0.00468545							0.0546423	6.99317e-05
Copg2																																													-0.0396465	0.00183619
Cops3					0.175635	0.000201543							0.124663	1.54208e-09																	0.10943	0.00880226	0.0794293	8.03229e-05	0.0951593	0.00858554									0.0896429	6.68289e-09
Cops4																																													0.0659609	0.000184658
Cops5	0.0815687	0.00235122	0.129909	0.00938988									0.0995057	4.79239e-07																	0.0415879	0.0036976													0.0631698	0.000205893
Cops6	0.12643	0.000180467											0.116451	6.08037e-08																															0.04641	0.000497765
Copz1													0.0584332	0.00485198																			0.0839742	0.000509923	0.0707109	0.00789683									0.0786455	1.53081e-10
Coq10b	-0.124623	0.00298744											-0.111365	5.03112e-05																			-0.112763	0.000648567	-0.161867	1.28621e-05									-0.145293	1.41411e-14
Coq8a	-0.187414	5.62682e-10	-0.191413	1.19827e-05	-0.203135	2.43755e-06							-0.201073	6.54291e-25	-0.141969	0.000127836					-0.110504	0.0042731									-0.12171	4.2022e-11	-0.210074	4.35181e-24	-0.237574	4.02703e-14	-0.268792	2.38498e-18							-0.241087	1.82092e-60
Coq9	-0.0921361	0.0018421											-0.0541309	0.00367557	-0.165275	0.00302502															-0.0952988	0.000271138	-0.0572016	0.0068808											-0.0478227	0.000217821
Coro1a	-0.193512	5.68982e-06											-0.105331	3.36336e-05																	-0.139462	7.09204e-06	-0.274803	2.10539e-23	-0.142593	1.81449e-05	-0.209872	5.9928e-10							-0.204068	3.7189e-36	-0.165577	0.00756415	-0.219732
Coro1b															-0.204373	0.00143465															-0.154686	6.38072e-07
Coro2a																																	-0.140772	6.19585e-08											-0.0992668	4.37879e-10
Coro2b	-0.0403505	0.00200779											-0.0191309	0.00431063																			-0.0253877	0.0018501
Coro7													-0.0553586	0.000636426																															-0.044298	0.00452781
Cotl1													-0.0546005	0.00448163																	-0.117172	0.00337908	-0.0778878	0.000341789	-0.0854222	0.0019079									-0.0828797	2.34927e-10
Cox10													0.0460135	0.000357366																	0.0614362	0.00258535	0.0675985	1.59882e-05											0.0542008	2.1624e-09
Cox17													-0.0727058	0.000361219																															-0.0547003	0.00038164
Cox18													0.0474802	0.00336958																			0.0555966	0.00800472	0.0559983	0.00638696									0.0594065	9.99918e-09
Cox19	0.0788701	0.00436375											0.0552134	0.000708566																			0.077942	0.00140859											0.03655	0.0047506
Cox4i2																	0.0774363	0.0066372													0.0647604	5.72565e-06
Cox5a	0.211326	3.21899e-09	0.197618	7.10293e-08	0.255265	7.41683e-09							0.235673	9.15339e-31	0.220414	9.47752e-05															0.178328	6.32652e-10	0.177132	5.5906e-11	0.175418	3.01339e-09	0.177012	3.22863e-08							0.188291	4.34725e-33	0.186471	0.000649422
Cox5b			0.1219	0.00984041									0.112801	1.59894e-07
Cox6a1																																													0.0504256	0.000946543
Cox6b1																															-0.0895125	0.00215143
Cox6b2																																													-0.0379647	0.00320191
Cox6c																															-0.107727	0.00110064	-0.0815358	0.00990459
Cox7a2l	-0.101539	0.00608959											-0.075023	0.000140759	-0.288829	1.2771e-06	-0.337441	3.00561e-09													-0.256895	4.21128e-19													-0.0532386	0.000186662	-0.235408	4.73669e-05	-0.233135
Cox7b	0.152768	0.000801107											0.102124	3.96565e-06																			0.130664	9.78377e-05	0.140326	3.76493e-05	0.176611	1.07927e-07							0.150876	2.41872e-19
Cox8a																															-0.0994173	0.00108909
Cpd																																													-0.0232615	0.00964411
Cpne2	-0.197036	6.94981e-07			-0.174524	0.00190082							-0.149826	2.72556e-10
Cpne3																																													0.0313133	0.00233492
Cpne8	0.129643	5.39903e-08	0.101764	0.00494005	0.114165	0.00227363							0.110061	2.57191e-14																			0.119883	2.04059e-10	0.104208	0.000111441	0.06947	0.00176803							0.0991553	2.80079e-18
Cpq
Cpsf1																																													-0.0270122	0.00948306
Cpsf2	0.0982323	0.0035819											0.083784	1.11494e-06																			0.107348	8.62481e-05											0.0856541	5.61537e-08
Cpsf4													0.0270493	0.00883747
Cpt2																															-0.0683719	0.000537671
Cpxm1	-0.0841086	0.000619438											-0.0657324	1.71766e-05																			-0.0496265	0.00588439	-0.0699187	0.00404698	-0.0878464	2.91864e-05							-0.0656055	2.27292e-11
Cracr2b													-0.0511963	0.00175356																			-0.0554025	8.51582e-05	-0.075297	0.00758022	-0.0926434	0.000215721							-0.0810045	2.45962e-14
Cradd																									-0.0579637	0.00825738
Cramp1l																									-0.0322995	0.00328549
Crbn													-0.0468194	0.00205052
Crcp													0.0419212	0.00391487
Creb1																															-0.0963724	0.00624558
Crebbp					0.147594	0.00630732							0.0734154	0.000144617
Crebl2	-0.0536454	0.00140618											-0.0562679	9.5584e-07																			-0.0329415	0.0065737											-0.0312489	0.000317201
Crebrf	-0.145253	9.80762e-09	-0.130143	0.00350842	-0.146566	0.00154075							-0.152428	4.91636e-18			-0.11352	0.00264663													-0.155049	8.67492e-11	-0.102435	1.08277e-06			-0.120287	0.00115642							-0.11158	1.7594e-14	-0.164222	0.00116997	-0.109467
Crebzf																															0.0941758	0.0095713
Creg1													-0.0886073	0.0011109			-0.190793	0.00345883													-0.144524	2.0281e-06
Creld2	0.0931759	0.00596958											0.0591005	0.00130018																	0.143457	1.09291e-06	0.110143	1.73741e-08			0.0804665	0.00127039							0.0885369	1.44567e-15			0.231477
Crim1													0.0483035	0.00337469
Crip1					-0.174297	0.00107064							-0.0957472	0.000252497																	-0.152558	0.000152715	-0.171369	2.00466e-08	-0.165969	1.39812e-07	-0.127476	0.00111962							-0.155436	1.45983e-18	-0.218203	0.00180168	-0.304015
Crispld1	-0.0832242	0.000366253											-0.0594594	9.29525e-05																			-0.078553	4.93175e-07	-0.0720192	0.00592456									-0.0767241	5.0536e-13
Crk					0.109603	0.0014771							0.0569121	0.000545584																															0.0533581	4.16144e-05
Crlf3	-0.140977	0.00229634											-0.132243	3.66446e-07	-0.220769	0.000735081															-0.17836	1.13633e-06	-0.119533	0.000591294											-0.0742742	0.000322549
Crls1													0.0455391	0.00145756							0.187369	0.00923373									0.11861	3.4638e-05					0.07181	0.00958472							0.0410525	0.000988536
Crnkl1	0.0847028	0.000656698											0.0475081	0.00438342																															0.0314751	0.00795402
Crot	-0.106611	3.03832e-05											-0.0877097	1.64274e-07																	-0.111079	1.24439e-05	-0.0667258	0.00173418											-0.0608819	2.72402e-06
Cry1	0.0583516	0.00304842			0.0710911	0.00107583							0.0647611	2.80976e-11																	0.0808101	0.000374811	0.0460499	0.000178843											0.0270184	4.03438e-05
Cryl1																																	-0.042893	0.000669046											-0.0234042	0.006324	-0.13092	0.00327671
Cryz													-0.0364367	0.00239894																	-0.0462432	0.00366463													-0.0285171	0.00172397
Cryzl2																																													-0.0492647	0.00277779
Cs													0.0333183	0.000972277
Csde1													0.0920557	0.000494717																	0.163076	4.65091e-06	0.0752146	0.00459083											0.0617418	0.00128927
Cse1l													0.0458828	0.00227153																															0.0378909	0.00266512
Csf2ra																																													0.0384332	0.00245686
Csf2rb			0.0298424	0.00906297									0.00854905	0.000968442																	0.0660755	0.00825089
Csf2rb2
Csgalnact1													-0.102058	8.50381e-06																	-0.0850236	0.00171596
Csgalnact2													-0.0473989	0.000101915
Csk																																	-0.124597	5.04256e-05											-0.0742043	6.8515e-05
Csnk1a1	0.151888	0.000681053	0.157557	0.000101702	0.172505	0.000617016							0.153865	9.04272e-13
Csnk1d	0.100605	0.00952961											0.0961645	4.32871e-06																															0.0617467	0.000128973
Csnk1e					-0.148666	0.00867371							-0.0768891	0.0031793
Csnk1g2																																													-0.055292	0.00481206
Csnk1g3																									-0.171571	0.00923272																			0.0334282	0.00526312
Csnk2a2	0.134373	0.00027913			0.124079	0.00321966							0.123318	5.22799e-10			0.188911	0.00643524													0.0988227	0.00473835	0.0746445	0.000858311											0.0686773	5.32822e-07			0.149062
Csnk2b	0.17686	1.45558e-06	0.127455	0.00561587	0.132653	4.90517e-05							0.144672	7.60663e-14																			0.111605	7.64275e-05											0.0722365	2.19657e-07
Csrnp1	-0.0904293	0.000662302											-0.0535987	0.00134321																			-0.0541076	0.00442051			-0.106276	0.000292034							-0.061349	2.4101e-07
Csrp1													-0.0973802	2.15336e-05																	-0.145145	0.000201987	-0.118592	8.61427e-06			-0.0927202	0.00534883							-0.103541	1.55426e-10	-0.20966	0.001936
Csrp2	0.190436	6.55891e-12	0.216518	6.30508e-08	0.194473	2.82336e-05							0.191558	2.33449e-24																			0.141247	9.48029e-11	0.137054	3.63948e-07	0.195348	6.53945e-11							0.149537	6.71405e-27	-0.137559	0.00649048
Cst3			-0.138401	0.00158036									-0.0889639	0.000147885																	-0.10459	0.00307152	-0.107353	0.000189087											-0.0706192	7.23185e-06
Cst7																																															0.156776	0.00743371
Cstb																																			-0.0808285	0.00765466									-0.0663492	1.77331e-05
Cstf1																									-0.0684282	0.00699287																			0.0197926	0.00305446
Cstf2	0.0622815	0.00221687											0.0387901	0.00116509
Ctbs																																													-0.0219384	0.00585646
Ctdnep1													0.0805064	5.30399e-05																			0.0673658	0.00269545											0.0581784	8.51811e-06
Ctdp1													0.0354509	0.000514734
Ctdsp2					-0.159565	0.000260361							-0.100174	4.94726e-07							-0.269924	0.0016958									-0.119313	4.33888e-05
Ctdspl	-0.113343	2.37567e-07			-0.107525	0.000366334							-0.0944115	9.42857e-11																	-0.0828373	0.00249892	-0.0582027	0.00142776											-0.0544313	7.00353e-07
Ctf1																																	-0.0356549	0.00444597											-0.0296932	0.000943126
Ctla2a																															-0.124712	0.00666484
Ctnna1																																					0.0870829	0.00265443							0.0557328	6.35984e-05
Ctnnb1													0.0943924	0.000215746																			0.0512333	0.00635158	0.114813	0.00155248									0.0882236	7.71681e-08
Ctnnd1													0.0381294	0.00104797																			0.0214459	0.00803224
Ctps	0.0784272	0.000434423	0.0904268	1.05511e-05	0.0883389	0.0016072							0.0982231	4.5438e-14	0.206914	0.00335702			0.27714	0.000399834	0.29573	9.34872e-07									0.226662	1.04299e-15	0.0829535	3.34315e-05	0.107023	4.627e-10	0.118527	1.2828e-11							0.101074	3.0718e-26	0.237318	6.72719e-05	0.194849
Ctr9																																													0.0441458	0.00383975
Ctsc	0.112607	0.000677302											0.0858743	4.8827e-06
Ctsf													-0.0523606	0.00411283																							-0.0927709	0.00376965							-0.0591927	1.9487e-05
Ctsl																																													0.00401567	0.00905787
Ctsz													-0.0756586	0.00314086																			-0.119554	2.90953e-05											-0.0805109	7.82155e-07
Ctu2	0.12461	5.57444e-05											0.0878387	3.03273e-07	0.180671	0.00482951					0.198107	0.00678696									0.174035	5.10707e-11	0.0920046	5.35148e-06											0.0653803	2.58954e-08			0.186981
Ctxn1																															-0.0785126	0.00241663
Cuedc2																																	-0.0922973	0.00425107
Cul1	0.0993933	0.00432115			0.145016	0.00564149							0.11186	1.46048e-08																	0.170116	1.05072e-06	0.132456	1.22959e-07	0.0922128	0.00190435	0.167239	2.90767e-06							0.134469	1.78254e-17
Cul2																																													0.034811	0.000920569
Cul3																	0.206637	0.00599032													0.155313	9.40962e-06
Cul5																																													0.0396063	0.00282731
Cul9													-0.0429028	0.00078894																			-0.0498386	0.00180079											-0.0379334	9.39087e-05
Cutc													-0.04112	0.00726187																	-0.0932591	0.000300562
Cwc15	0.114996	0.00010302											0.0923891	1.95401e-05																			0.114452	0.000212567			0.109119	0.00835295							0.0905616	2.95291e-07
Cwc22													0.0481506	0.00137818																															0.0396029	0.00031606
Cx3cl1													-0.0209904	0.00340727
Cxxc5													-0.0290525	0.00259784
Cyb5a	-0.159457	0.000390399			-0.181863	0.00054439							-0.155517	9.44466e-11	-0.184948	0.00826117															-0.17875	2.35776e-07	-0.164464	3.64995e-07	-0.123594	0.000138096	-0.134089	0.00106293							-0.14734	2.17105e-17	-0.153452	0.00130534
Cyb5b																																	0.082989	7.19557e-05											0.0597276	4.38494e-07
Cyb5r1
Cyb5r3																																	-0.0802556	0.00115542											-0.0608407	4.6794e-05
Cyb5r4																																													0.0378518	0.000764687
Cyba	-0.162937	0.000434423	-0.188339	0.000100779									-0.163388	1.30759e-11																			-0.188724	1.81845e-09	-0.135381	0.000147737	-0.191001	7.10588e-07							-0.167231	4.59758e-21
Cyc1	0.176821	1.52374e-06			0.114881	0.00397482							0.126514	8.95296e-12					0.207454	0.00441307											0.121621	4.40829e-05	0.0841556	0.000378194	0.0857692	0.000486285									0.0844889	1.63707e-11
Cycs	0.270159	9.54809e-14	0.207621	2.68264e-09	0.146133	0.00238657							0.238326	2.02823e-30	0.179591	0.00927171	0.205644	0.00714663													0.220606	4.86298e-10	0.194877	2.51521e-12	0.189266	2.07165e-11	0.185506	2.5856e-09							0.202159	3.14496e-36	0.224924	0.000490147	0.231936
Cyfip2																																	-0.0732415	0.00820844											-0.0604852	0.000298221
Cyp26b1													-0.0497228	1.13794e-05																					-0.0558843	0.00874784	-0.0580839	0.00243097							-0.0463097	4.76802e-09
Cyp2j6													-0.0667348	5.69624e-05																	-0.0846234	4.77044e-05	-0.0967477	2.09881e-07	-0.0825338	0.0019079									-0.0865898	1.32012e-13
Cyp2j9													-0.0559711	5.84966e-06																	-0.0730637	3.11581e-06													-0.0477494	4.08788e-07
Cyp4f16																																													-0.0194874	0.00168933
Cyp4v3																																													-0.0291381	0.00229033
Cyp51	-0.0508839	0.00908309											-0.0515405	0.000190213	0.193706	0.00382614									-0.0469796	0.00953934					0.0997716	0.000176227	0.0944718	2.72772e-06			0.116537	1.05242e-05							0.0830228	3.38902e-13	0.178826	0.00440093	0.170296
Cyp7b1													-0.0287464	3.78118e-05																			-0.0401481	0.00240051											-0.0364106	4.89675e-07
Cysltr2													0.0394527	0.000282619																			0.0402621	0.000712508											0.0265605	0.0018084
Cyth1																																													-0.0368256	0.000108285
Cyth2																																	-0.0557653	0.00168728											-0.0444992	0.000102092
Cyth3																																													-0.0304609	0.00406752
Cyth4	-0.140304	1.85415e-05	-0.147458	0.00261138									-0.14753	6.55072e-13																															-0.0685167	3.06409e-05
Cytip					0.122234	0.00453084							0.0804459	2.44498e-05
D030056L22Rik																																													-0.0526326	3.19023e-05
D10Jhu81e																																													-0.0417268	0.00720874
D10Wsu102e																															0.10366	0.00216914
D130020L05Rik																															-0.0421456	0.00384469
D17Wsu92e													0.0541285	0.00304984																	0.0813567	0.00594222	0.0473923	0.00647189											0.0372792	0.00125615
D1Ertd622e																															0.0671721	0.00121305																	0.0967799
D2hgdh	-0.0556753	0.00105601											-0.0486828	2.43953e-05																	-0.0502182	0.00366463
D3Ertd751e													-0.0510128	0.000223559																					-0.0764651	0.000235802									-0.0513864	5.86331e-08
D430042O09Rik																															-0.0567008	0.0055414
D5Ertd579e	0.0838099	0.00322304											0.0486912	0.00322697																			0.0595226	0.00693499											0.0416573	0.00154523
D5Ertd605e																															-0.0731103	0.00146484
D630039A03Rik	-0.0707635	1.15818e-06											-0.0601818	8.10638e-09																			-0.0459581	0.000204143	-0.0797515	1.69896e-05									-0.0583505	1.76447e-13
D630045J12Rik
D730003I15Rik					-0.0651571	0.00956585
D8Ertd738e																																					-0.130055	0.000262789							-0.0348311	0.00124041
D930016D06Rik													0.0259416	0.0031322
Dab2ip	-0.115692	9.04685e-07	-0.0972248	0.00843821									-0.101243	5.3394e-13																			-0.049297	0.00307775											-0.0477592	6.2349e-06
Dach1			-0.125737	0.00810993									-0.0984398	2.57307e-07																	-0.107784	6.36182e-05	-0.0747648	0.000817524											-0.0638326	8.77924e-06
Dad1	0.141103	5.72567e-06											0.0938861	3.6893e-08																	0.114119	0.000244258	0.176193	6.81649e-14	0.088677	0.000499116	0.171254	9.446e-09							0.147103	8.40717e-29
Dag1																																	0.0487809	0.00690137
Dand5																																													-0.021596	0.00364029
Dap																															-0.180493	6.31068e-08
Dapk3																																													0.0375879	0.00154523
Dapp1					-0.196414	0.00118968							-0.100034	0.000479458																	-0.116909	0.00305459			-0.140217	0.000238844	-0.124589	0.0089231							-0.1128	1.68078e-08
Dars2													-0.0271168	0.00690811																															-0.0270475	1.79213e-05
Daxx																																													0.0325956	0.00900359
Dazap1													0.087604	0.000252147																															0.0644683	3.90026e-05
Dazap2
Dbi													-0.0764055	0.0027818																	-0.103313	0.00462026	-0.107267	0.00455647											-0.0741334	0.000207333
Dbnl																																													0.0487251	0.000588584
Dbp													-0.0673974	2.74633e-07
Dbt													-0.0365405	0.00334033
Dcaf1																															0.0983891	0.00064785
Dcaf10																																	0.0319604	0.00129411			0.0493416	0.000690273							0.0303067	2.00331e-05
Dcaf13	0.102498	0.000131665											0.083697	5.21031e-07							0.201591	0.000801723									0.131362	1.29551e-06	0.0699673	0.0065872											0.0480479	0.00087034
Dcaf17	-0.0734039	0.00605556											-0.0728275	3.36533e-05																	-0.0825681	0.00207233
Dcaf4													-0.0414826	0.001122																			-0.0400114	0.00887506											-0.0351383	9.7979e-05
Dcakd																									-0.096698	0.002359
Dck	-0.0439315	0.000200718											-0.0337598	3.39473e-05							-0.13176	0.00202856
Dcp1b																									-0.0170787	0.000936716
Dctd
Dctn2	0.14466	0.00032121	0.114044	0.00622627									0.0874639	3.76424e-05
Dctn4																																													0.0517213	0.00516633
Dctpp1															0.221876	0.000482443	0.175018	0.00700121													0.215255	1.67307e-08			0.121069	5.67312e-05	0.151419	3.57641e-08							0.133683	2.59204e-13	0.258333	3.70002e-09
Dcun1d1	-0.129017	0.00709066											-0.117334	5.87267e-06	-0.285394	1.88232e-05			-0.355792	2.00047e-05											-0.246194	1.6308e-13													-0.0726276	0.000277125
Dcun1d5	0.234143	3.68515e-10	0.123516	0.000427166	0.198331	4.61103e-05							0.188338	4.98321e-19	0.256686	1.53056e-05	0.297719	0.000101688			0.276047	0.00364287									0.22103	2.41746e-12	0.114029	2.37512e-06											0.0831115	3.2407e-09
Dda1													0.0304353	0.00187683
Ddah2
Ddb1																																					0.116791	0.00156726							0.0764338	1.05618e-05
Ddb2													-0.029018	0.00403434
Ddi2													0.0434896	0.00382584																			0.0391804	0.00703416			0.0604376	0.0098758							0.036699	0.000634695
Ddit3	0.158285	1.17603e-08											0.109412	6.21848e-10																							-0.105248	0.0035838
Ddit4																																															-0.108045	0.00452217
Ddost			0.128742	0.00335284									0.122982	6.00616e-09																			0.120447	1.72096e-05											0.10882	1.21681e-10
Ddt																																			-0.0880581	0.00525769									-0.0692199	1.14098e-06
Ddx1	0.111653	0.00604298											0.104602	2.13697e-06																					0.0790035	0.00598003									0.078043	2.95699e-08
Ddx10	0.19854	3.02984e-09			0.125632	0.00314879							0.129932	2.41623e-12																	0.134865	0.00021327	0.141211	2.91104e-07			0.148197	5.20407e-07							0.119512	7.08567e-16	0.308169	5.60763e-07
Ddx17																																	0.119011	5.21921e-05											0.0832211	2.8629e-06
Ddx18	0.158063	2.55438e-07											0.102049	5.37755e-09	0.256619	6.32919e-05	0.224306	0.000651063													0.211144	7.58551e-13													0.0517515	0.000119425	0.208103	0.000835737
Ddx19a													0.00872306	0.00362807
Ddx20																	0.103497	0.0090943													0.0928911	7.64038e-06
Ddx21	0.381007	1.39901e-25	0.264234	3.07063e-11	0.342972	2.50095e-17							0.350545	6.09471e-60	0.386373	1.27325e-10	0.359407	1.00009e-10	0.39622	1.11067e-05	0.458962	1.91327e-10									0.418308	7.09672e-42	0.332152	2.29618e-38	0.154679	1.15351e-07	0.305845	3.208e-21							0.284605	2.00467e-72	0.407694	2.58211e-10	0.45908
Ddx24	0.211811	7.93578e-08											0.161458	5.21705e-12	0.289255	9.22214e-06	0.336194	4.24598e-06													0.233699	2.81758e-12	0.11711	1.51434e-06	0.109577	0.000895166	0.127939	0.00251071							0.121166	1.68326e-13
Ddx27	0.142331	0.000497574											0.129248	7.77292e-10	0.259505	0.00010762	0.230161	0.000615156													0.228214	1.9335e-13	0.189736	5.51088e-15	0.113729	0.000270006	0.171183	1.04917e-08							0.167612	4.49106e-30	0.26106	1.41076e-05	0.216887
Ddx31													0.039884	0.000287172	0.122208	0.00574711	0.12004	0.00192437													0.109618	7.8831e-09
Ddx39	0.223707	2.37886e-10											0.168405	2.18427e-17			0.246144	0.00046483			0.302327	0.000188467									0.229667	2.74043e-13	0.181498	3.95285e-15	0.144251	4.24215e-11	0.121219	4.83736e-06							0.166049	2.26958e-34	0.474991	1.61744e-14	0.229535
Ddx39b													0.0871829	0.00217606																			0.121531	0.000402127			0.111146	0.00561955							0.106631	8.09838e-09
Ddx3y	0.0978627	0.00915245	0.140515	0.000219997									0.0930128	1.24462e-05
Ddx41													0.0525682	0.00119294																			0.0696297	0.000249871											0.0470889	0.000167482
Ddx42													0.0540868	0.00577814																							0.0874655	0.00631793							0.0656763	2.93064e-06
Ddx46			0.13591	0.00363931									0.110613	4.77893e-07	0.269139	7.37253e-05					0.316617	0.000530393									0.209225	1.37211e-10	0.157812	1.60605e-09			0.18631	1.46109e-07							0.14443	3.42862e-19	0.271789	8.4923e-06
Ddx49																																													0.0359562	0.000420228
Ddx5																									-1.33544	0.00482698							-0.0950425	5.97227e-05			-0.103466	3.50046e-05							-0.0854836	5.79578e-11	0.149935	0.0045316
Ddx50													0.093529	0.000168375																															0.0361665	0.00858253
Ddx51																																													0.0212071	0.00593007
Ddx54	0.160518	5.45749e-06			0.1809	0.000257457							0.144469	1.57845e-11	0.223763	0.00150589															0.182083	4.89572e-08	0.16326	4.55565e-09	0.0707442	0.00286847									0.109402	1.69822e-13
Ddx55																																													0.0331014	0.000921882
Ddx56	0.169147	2.60934e-09											0.113744	1.59656e-12																	0.121923	0.000411182	0.0885148	2.5929e-05			0.0789387	0.00636575							0.0847368	2.52977e-11
Ddx6	0.106081	0.00245991	0.148549	0.00243328	0.174913	8.96845e-05							0.139087	1.49025e-11																			0.0808819	0.00353943	0.170511	2.04299e-07	0.104911	0.00214777							0.119756	1.55763e-13
Ddx60													-0.0497188	0.00049427
Decr1																															-0.0866579	0.00844422													-0.0463486	0.00169711
Dedd																																			0.0565977	0.00918184									0.02843	0.00116223
Dedd2																																													-0.0293239	0.00625059
Def8	-0.133047	0.000105964	-0.206686	1.05511e-05	-0.224403	1.30472e-05							-0.187144	1.35009e-17																	-0.158408	4.51406e-07	-0.161024	3.40368e-09			-0.159274	2.48147e-05							-0.138819	1.29109e-16
Dennd1c															-0.154926	0.00016856															-0.0953048	5.37789e-06													-0.0370152	0.00391084
Dennd4a																																	-0.0880463	0.00393548			-0.221888	2.80447e-08							-0.143569	9.62199e-16
Denr	0.130574	0.00158648	0.130504	0.00899299									0.137375	1.08837e-10																	0.108792	0.000732524	0.120659	1.54452e-05											0.0896108	9.71606e-11
Deptor																																	-0.0518398	0.000146381											-0.0480067	3.89246e-07
Derl1																																	0.0826187	0.0011189											0.0444852	0.000972945
Derl2			0.0217684	8.95493e-05									0.0487794	0.000230137																			0.0829825	1.92968e-05											0.0540581	2.9964e-06
Desi1													0.0450927	0.000377741																			0.0446615	0.00017317											0.0362965	9.49643e-07
Desi2	0.139504	4.64359e-06											0.0766393	4.47075e-05																	0.113101	0.000133245													0.0548915	1.89075e-05
Dexi													-0.0504495	0.00128916
Dgcr8																																					0.060139	0.00566815
Dgka																																													-0.0231126	0.00842049
Dgkd																																													0.0245685	0.00600417
Dgkg	-0.0622391	0.00848452											-0.0487722	0.00135876			-0.124061	0.00034939													-0.087368	7.92551e-07	-0.0687128	4.69952e-05	-0.0765122	0.00135841	-0.063616	0.0074501							-0.0677834	6.5933e-12			-0.0844642
Dgkh																																													0.0222868	0.00128794
Dgkz													-0.103413	3.5871e-07																			-0.0555375	0.00986999											-0.0530595	0.000681311
Dguok																	-0.196153	0.0091295													-0.153487	2.65989e-07	-0.127415	8.3281e-05											-0.0818801	7.15496e-06	-0.179917	0.0055452
Dhcr7	-0.0764978	0.00342169	-0.0926751	0.000776527	-0.0875075	0.00375051							-0.0800142	4.20691e-09
Dhdds																																													0.0267079	0.00673781
Dhfr																																													-0.0305886	0.00010528
Dhrs1													-0.0574817	0.00126963																															-0.0366784	0.00353411
Dhrs11																																	-0.0509715	0.00106525											-0.0351476	0.00203297
Dhrs13													0.0354508	0.000341149	0.1251	0.00790974	0.193698	0.000654055													0.135569	8.02486e-10													0.0236378	0.00387411			0.133163
Dhrs3													-0.022956	0.00562842	-0.248337	1.16888e-05					-0.291023	0.000377122									-0.174884	1.26272e-10
Dhrs7			-0.0913691	0.000258932									-0.0590553	0.000342116																	-0.0820488	0.000994587	-0.0650018	4.49404e-05	-0.0669074	0.000716728	-0.0956654	7.13413e-05							-0.0770868	3.41634e-14	-0.146444	0.00199381	-0.126071
Dhrs7b																																													-0.0365017	0.00127299
Dhx15	0.0772285	0.000697164											0.0915653	6.16436e-06																	0.153768	1.3203e-05	0.0764162	0.00981136											0.0606642	0.000125627			0.156761
Dhx29	0.0637965	0.00817736											0.0475039	0.000202523																	0.107524	1.84528e-05	0.0815757	4.08406e-07			0.0533881	0.00559402							0.0666848	3.25104e-15	0.157614	0.00515537
Dhx30																																					0.0732169	0.00454561							0.0546837	0.000315777
Dhx33																																													0.0192084	4.86329e-05	0.0970569	0.00427215
Dhx36																																	0.145525	1.36457e-07											0.0828277	2.96446e-06
Dhx37	0.0565303	0.00734951
Dhx40													0.0271886	0.00672049
Dhx8																																			-0.030491	0.00329082
Dhx9													0.0596102	0.00480638	0.208492	0.00160166					0.257489	0.00794769									0.229015	1.56378e-10	0.0760033	0.00818147	0.0992478	0.00206673									0.0831626	2.70308e-07
Diablo	0.0764202	0.00269875											0.082759	2.08283e-06	0.267833	2.15269e-05															0.183809	1.74674e-08	0.0895146	0.000116727											0.0539667	5.23922e-05	0.234569	0.000211632
Diaph1																																	0.140219	9.01652e-06											0.0834697	1.26704e-06
Dicer1													0.0572931	0.00235128																	0.100093	0.0041895	0.0803439	1.37857e-05											0.0535788	6.21443e-06
Diexf																																	0.0472339	0.00225963											0.0253458	0.00279834
Dimt1					0.120128	0.0010073							0.0687542	4.83609e-06			0.164843	0.00706149													0.108176	0.000103786													0.0378105	0.00033878
Dis3	0.0549977	0.00107656											0.0597882	4.0913e-07			0.181056	0.000167834			0.211145	0.007358									0.186988	4.75747e-13	0.111035	1.15622e-11	0.0648311	0.000697754									0.0831138	2.82831e-18			0.147613
Dkc1	0.226296	3.67009e-08	0.140093	0.00288947	0.182548	0.000248759							0.206058	1.50117e-19	0.350828	1.27886e-09	0.205309	0.00514784	0.308067	0.000120841	0.246088	0.00019777									0.30326	8.37422e-23	0.194603	2.87031e-11	0.146246	3.8534e-06	0.19096	3.43635e-09							0.192572	2.92792e-30	0.425327	2.538e-15	0.234439
Dkkl1																																	-0.0771009	0.00257839											-0.0611935	6.20682e-05
Dld													0.0641087	0.00362469																			0.0873208	0.000388251											0.0603248	1.37317e-05
Dlg3																																													-0.0227039	5.39275e-05
Dlgap5																															-0.053898	0.00996478
Dlk1	0.105334	4.65006e-07	0.104816	0.000169655	0.125896	0.00136132							0.112328	4.88033e-16																			0.0703549	1.84333e-06	0.0844418	3.77237e-06									0.0695979	6.96154e-13
Dlst													0.0598964	0.00909746																															0.0379329	0.000630553
Dmac1																																													0.0234693	0.00606212
Dmtf1																																													0.0374816	0.00547358
Dmwd
Dnaja1	0.598631	5.19979e-65	0.498183	4.73523e-39	0.411264	1.6373e-19							0.515867	6.35645e-127	0.588995	3.28966e-25	0.352981	5.23986e-10	0.542943	5.58036e-14	0.620448	2.82295e-19									0.516249	3.18214e-68	0.242276	4.6618e-22	0.21403	1.95912e-12	0.228147	2.04956e-12							0.236837	1.31902e-51	0.223446	5.3621e-05	0.412879
Dnaja2	0.334719	8.43951e-23	0.232985	1.30212e-11	0.332896	4.14621e-14							0.30204	2.28703e-52	0.355005	1.79787e-10	0.381716	3.54679e-10	0.349929	4.80153e-05	0.453812	6.72007e-12									0.373151	2.04944e-37	0.307364	2.24929e-32	0.186867	6.77732e-11	0.292131	3.05843e-20							0.265127	4.93068e-67	0.30879	1.06094e-07	0.355177
Dnaja3													0.0415483	0.00640329																	0.10895	0.000532209													0.0502234	2.11205e-05
Dnajb1																																	-0.0915829	0.000636452			-0.242614	1.48005e-08							-0.129119	8.14158e-13
Dnajb11	0.143764	0.000535489	0.137159	0.000153272									0.128528	8.71602e-10	0.188254	0.00420305			0.251882	0.0027485											0.178037	7.54624e-08	0.214041	3.63425e-21	0.183495	2.0937e-16	0.178123	4.07408e-11							0.205262	5.1298e-55	0.270985	7.26913e-06	0.292269
Dnajb14																																													0.0395394	0.00560094
Dnajb4													-0.0668728	0.00047326																	-0.0900463	0.000417818													-0.0470193	0.00437647
Dnajb6													0.0994498	2.20348e-05
Dnajb9	0.271781	3.42851e-15	0.197919	2.59483e-07	0.194675	0.000794097							0.225156	2.63567e-25																	0.119593	0.000376207	0.172054	3.20343e-08											0.105921	6.99169e-08
Dnajc1																																	0.0832345	0.00013621											0.0671231	1.48762e-06
Dnajc11	0.0983161	0.000939959											0.0759137	3.98141e-07																	0.0897288	0.00755931	0.0827784	0.000154695	0.0790391	0.00114783									0.0722025	1.71454e-09	0.168595	0.0074778
Dnajc12																																	-0.0323123	0.00342573											-0.0430222	5.82002e-09
Dnajc14																									-0.0428933	0.00142118
Dnajc15					0.128647	0.000628258							0.0949764	6.52759e-07																	0.131902	0.000203158	0.096455	1.52192e-05											0.0843718	7.12023e-10
Dnajc19																																													0.0587654	0.000535773
Dnajc2	0.248241	2.13927e-10	0.132589	0.00796189	0.208076	5.99598e-06							0.207929	1.41998e-21	0.312613	2.09341e-07	0.326782	9.99648e-09	0.28423	0.00134304	0.475439	1.028e-10									0.347958	1.76028e-31	0.168624	1.32805e-12	0.108522	0.00429877	0.135699	2.02431e-05							0.152461	8.53626e-24	0.257613	7.89081e-07	0.330488
Dnajc21	0.131517	0.000154401											0.108684	1.62559e-08	0.289505	5.59784e-06	0.212006	0.00417853													0.234691	1.07614e-13					0.0895513	0.00740148							0.058266	1.17128e-05			0.227435
Dnajc25	0.0936085	4.16989e-06											0.0611586	2.64533e-07																	0.0931808	1.18601e-05	0.0574767	0.000151253			0.0473442	0.00265443							0.0484742	3.06988e-08
Dnajc3	0.20841	4.66437e-09			0.159555	0.00119648							0.153602	3.67354e-13	0.171933	0.00706893															0.132337	3.05575e-05	0.209788	6.66356e-19	0.100444	0.00174326	0.233942	2.19038e-14							0.180775	5.751e-36	0.241184	0.000356695	0.332797
Dnajc30													0.0472194	0.00660101											-0.0615935	0.00751446
Dnajc5	0.177004	2.13927e-10			0.161979	0.000143042							0.153889	1.38734e-18																			0.0948145	3.59749e-06	0.0904867	0.00870645	0.110325	9.53145e-05							0.0981426	1.05607e-13
Dnajc7													0.0730687	0.0018837
Dnajc8																																													0.0817109	1.16928e-05
Dnal4																																	-0.00998639	0.00617861											-0.00479801	0.00971536
Dnase1l1																																													-0.0175293	0.00722259
Dnase2a													-0.0528293	0.00317433
Dnlz																																	0.0690355	0.00884923											0.0598052	1.98051e-06
Dnm2
Dnmt3a																																	0.0375998	0.00159633	0.0836307	0.00700305									0.0656094	2.32995e-07
Dnmt3b													0.0209084	0.00711842							0.160131	0.00702015									0.135089	1.63043e-06													0.0440471	0.00172289
Dnpep																															-0.108247	0.000387542
Dnph1																																													0.0399628	0.00189703	0.185225	0.0057844
Dnttip1													0.0769662	0.000425634
Dnttip2													0.0706935	0.00564022			0.23612	0.0041017													0.119587	0.000506811	0.0865597	0.000509447											0.0660738	7.53621e-06	0.22869	0.000313938
Dock10	-0.0794356	0.00191227											-0.0567103	0.000559601	-0.250533	0.00119921	-0.192224	0.00648277			-0.317955	0.00447187									-0.242472	3.95162e-12	-0.0647815	8.62481e-05	-0.0648599	0.00709528									-0.0648802	1.88498e-09	-0.242331	0.000109328
Dock11																																													-0.0306971	0.00266513
Dock2					-0.166033	0.00325359
Dock8	-0.0713474	0.000900448											-0.0654115	7.20163e-07																															-0.0360455	7.58789e-05	-0.154241	0.00671487
Dok2																															-0.11239	0.00175304															-0.198337	0.00144881
Dok3																																													-0.0257717	0.000301472
Dpagt1																																	0.0642969	0.000169711			0.0740395	1.21799e-05							0.0498597	1.38293e-08
Dpf2													0.0558901	0.00288855																					0.0662886	0.00791325
Dph2																															0.0765094	0.000171071	0.0397278	0.00170829											0.0232907	0.00272111
Dph3	0.161373	6.25772e-06											0.118777	1.15123e-08																	0.156615	4.31232e-07	0.130981	7.01316e-10											0.0836834	1.84846e-09
Dph5													0.0766722	0.000847334
Dph7																																													0.0199947	0.00655252
Dpm1																																													-0.0577977	0.00198544
Dpm2													0.0524317	0.000102689
Dpm3	-0.167016	8.00044e-05											-0.0959214	0.000181306
Dpp3													-0.00839064	0.00326353
Dpp4																															-0.069308	0.00379309													-0.0357435	0.000153144
Dpp9																																													0.0295023	0.000864399
Dpy19l3	-0.0925759	0.000180506											-0.0824419	1.01633e-08																			-0.0876614	6.5141e-08			-0.108922	0.000185504							-0.0785696	2.66327e-12
Dpysl2													-0.0309698	0.00360584																															-0.0312021	0.000108031
Dram2																									-0.0580146	0.00595435
Drg1	0.123141	0.00397332			0.135137	0.000959466							0.101881	9.85845e-07
Dscr3	-0.0560563	0.00882091			-0.0803499	0.00267551							-0.0643621	2.09404e-07							-0.146952	0.0071637									-0.0901576	6.20116e-06	-0.0603407	1.60649e-06											-0.0456148	7.72998e-07
Dst	-0.0846709	0.00881808											-0.0746098	0.000191397																															-0.055246	0.000771174
Dtd1																																	-0.128675	2.70913e-05											-0.0829785	2.10051e-06
Dtl																																															0.242576	0.00182173
Dtnbp1	-0.185425	1.34503e-06											-0.0667771	0.00606553																			-0.198395	3.41678e-12			-0.121137	0.00394543							-0.134	2.49851e-15	-0.196419	0.00394993
Dtx3																															-0.0957433	0.00266726					-0.100439	0.0044881							-0.0637264	8.02314e-06
Dtx3l													-0.0561343	0.00179905
Dtymk																																															0.193769	0.00319177
Dus1l	0.0916815	0.000542505			0.0982966	0.00426172							0.0663685	3.68817e-07																	0.0966087	0.00433505	0.0722117	0.00104206											0.0572506	2.02557e-06	0.178783	0.00124076
Dus2					-0.122029	2.21757e-05							-0.068932	2.09327e-07																															-0.038228	0.000448701
Dus4l																															0.0476828	0.0067478
Dusp1	-0.298046	1.84717e-06	-0.277263	1.39347e-05	-0.386147	3.5509e-08							-0.316104	3.00339e-20	-0.205948	4.57596e-05	-0.309088	1.19243e-05													-0.30868	4.32392e-16	-0.239513	3.33283e-07	-0.310249	1.92625e-10									-0.223874	1.65527e-16
Dusp12	0.0831405	0.00161062											0.0535559	3.98985e-05																	0.0890042	0.000960496
Dusp19																															-0.0468821	0.00223503			-0.0510943	0.002988									-0.0289862	5.70437e-05
Dusp2					-0.290492	0.000924932							-0.181966	2.30818e-07																			-0.153687	0.00166974	-0.185889	0.000565419	-0.113045	0.00599675							-0.164921	1.38119e-09
Dusp5																																	-0.00486115	0.00121418
Dusp6													-0.0425415	0.0021323																	-0.0919755	0.000732851	-0.0694807	2.38223e-05											-0.0560409	3.51715e-09
Dusp7	0.0403748	0.00820373											0.0361956	0.00016223
Dut	-0.254726	6.54143e-09	-0.143071	0.00178608									-0.160377	6.42867e-10																			-0.152881	8.21944e-06											-0.0633507	0.00193893
Dvl1																																													0.0264869	0.00625736
Dxo																									-0.0730496	0.00740707
Dync1i2																																													0.0344981	0.00637084
Dync1li1													0.047101	0.00284345
Dync2li1	-0.0668472	0.00413842											-0.0487544	0.000132268																			-0.00962897	0.00420231											-0.0180793	0.00139307
Dynll1	0.424401	2.75447e-27	0.333855	9.24765e-17	0.209811	1.02263e-06							0.344985	7.74027e-54	0.318584	3.19902e-06	0.326469	3.9615e-07	0.320752	0.000449014	0.397379	6.00749e-05									0.323216	4.08754e-23	0.188032	1.06837e-08	0.105874	0.00103895	0.140702	4.23392e-06							0.158194	3.19228e-22			0.303331
Dynll2	0.114787	0.00178785											0.0986878	1.76719e-08			0.211795	0.00402606													0.170459	4.17674e-07	0.10239	0.000247994			0.0923848	0.00968386							0.0975946	1.6098e-10			0.25366
Dynlrb1																															-0.116927	0.000102129	-0.107549	0.00226465
Dynlt1f																															-0.128911	1.69369e-05
Dynlt3					-0.13141	0.00664407							-0.0750113	0.00129921
Dyrk1b															-0.0437718	0.00839302		0.00722849													-0.0339205	3.95367e-05
Dyrk2																									-0.126749	0.00751806
Dzip3																																			-0.0601019	0.00950456									-0.0322875	0.000438186
E130102H24Rik													-0.0421494	0.000409822																							-0.0561132	0.000738751							-0.039699	3.82787e-07
E130309D02Rik													0.0446183	0.000122931																			0.0434656	0.000864647											0.0347029	0.000239175
E130311K13Rik			-0.000159854	0.00713143																																									-0.00153409	0.00452094
E230001N04Rik																																													-0.0229509	0.00752489
E230032D23Rik	-0.0560535	0.00105671			-0.093933	7.73672e-05							-0.0670501	1.9959e-09	-0.112433	0.00179038															-0.0893236	2.34863e-07	-0.0476972	8.07105e-05											-0.0410122	2.02557e-06	-0.132324	0.000967475
E2f1																																	-0.0325424	0.00413643											-0.0231773	0.000640776
E2f4	0.0590562	0.00116696											0.0582816	2.80068e-05																	0.111358	0.00176561	0.0981087	8.19306e-06			0.0879464	0.000162091							0.0861866	1.06516e-11
Eapp																																	0.0740228	0.000913509
Ebag9																																			-0.00145434	0.00489337
Ebi3																																	-0.0892794	0.000446402											-0.0838058	5.44797e-07
Ebna1bp2	0.153154	0.000350693			0.120115	0.000543064							0.124789	2.68921e-11	0.304119	1.51482e-07															0.208305	3.22366e-13	0.1091	8.11775e-06											0.10058	2.06915e-12	0.25484	1.73327e-06	0.33964
Ebpl	-0.103139	0.00422753											-0.091371	3.0028e-05									0.306785	0.000419096																					-0.0580495	0.00069395
Ecd																	0.165105	0.00890419															0.0102131	0.00411833											0.0368281	0.000204813
Ech1	-0.122082	0.00848479											-0.0853242	0.00155776
Echs1																																													-0.0481389	0.00999802
Ecscr	-0.099017	0.00146405	-0.119292	0.00296259									-0.107075	4.45343e-09																			-0.0636272	0.0019635											-0.0578932	2.78788e-06
Ecsit													0.061016	0.00033841	0.212491	8.82303e-05	0.163068	0.0070307													0.158216	1.15005e-08	0.0652062	0.000672645	0.0661276	0.00660384	0.0532228	0.00627862							0.0621136	1.34847e-09	0.28294	7.4931e-08
Edem2													-0.0758396	0.000889496	-0.188641	0.00154457															-0.111476	0.00219883													-0.0543259	0.00110367
Edf1			0.133587	0.00503875									0.0818356	0.000941934																	0.084837	0.00488852	0.13272	1.38622e-05			0.154969	1.4343e-05							0.121539	2.01473e-13
Eea1					0.112077	0.00376199																									0.0968578	0.00480428
Eed													0.0459951	0.000106511			0.191845	0.0079587													0.132383	0.000186396
Eef1a1	-0.103248	8.07717e-19	-0.0535517	0.000361942	-0.0640186	0.000127842							-0.0788718	3.476e-29	-0.21288	8.73298e-19	-0.20138	6.29171e-16	-0.128752	0.000563683	-0.142067	1.31428e-05			-1.57947	3.45176e-12					-0.177959	6.79532e-44	-0.0931659	1.02971e-28	-0.0611748	2.02449e-09	-0.05645	1.69788e-05							-0.0735365	7.53611e-42	-0.195856	1.30985e-16	-0.227435
Eef1akmt1
Eef1akmt2																					-0.229133	0.00871637									-0.0900417	0.00271432	-0.0561556	0.00849567											-0.0505262	7.94202e-05
Eef1akmt4	0.0918719	0.000481272			0.0816289	0.00547942							0.073535	2.32322e-08																	0.0916981	0.00125421	0.0757656	0.000145509	0.0485607	0.00704134									0.06301	6.08983e-11
Eef1b2	-0.126849	9.1572e-13	-0.124688	4.77793e-07	-0.110557	0.000137055							-0.124408	2.81522e-26											-1.42834	1.2044e-05							-0.0702107	2.52816e-07	-0.0690614	0.000542538	-0.0695599	0.00103386							-0.0683549	5.29273e-15
Eef1d	0.118249	0.000229447											0.0655113	0.000559601																	0.0883942	0.00291516	0.0953036	5.69766e-06			0.123579	2.20437e-05							0.0747722	4.12388e-08
Eef1e1	0.107924	0.00125866	0.137167	0.000545986	0.138559	0.00104922							0.135323	8.18123e-13	0.218894	0.00194978	0.266091	0.000269088			0.286787	0.000683058									0.22883	3.50728e-13			0.0776852	0.00657594									0.0661198	3.16518e-05
Eef1g																															0.097362	7.16738e-05			-0.0865864	0.00540605
Eef2	-0.103212	1.50975e-05											-0.0596532	4.09955e-05	-0.164627	0.000325557															-0.121668	3.79006e-08													-0.0298647	0.00910804	-0.133195	0.00136834	-0.160272
Eef2k													-0.0799235	0.00133857	-0.275939	6.86692e-05															-0.175349	9.20962e-07
Eef2kmt																																													0.0512799	0.00317201
Eepd1	-0.0900154	5.3847e-06											-0.055169	7.50755e-05																			-0.0804175	8.02727e-10	-0.077911	0.00102445	-0.109843	1.00302e-06							-0.0923375	7.85372e-22
Efcab14	-0.122943	0.003228
Efcc1	-0.0747032	8.52453e-05											-0.0738085	3.65163e-10																			-0.0406655	0.00726908											-0.0452592	3.18364e-06
Efhd2
Efr3a													0.0444403	0.00631625																															0.0445375	0.00239238
Eftud2													0.0473212	0.00972696	0.217957	0.00052189															0.144724	4.33888e-05
Egfl7
Egr1	-0.176593	3.77259e-05	-0.202166	0.000415243									-0.175235	1.42066e-11	-0.20248	0.00937901	-0.217151	0.0004775													-0.266765	4.5506e-12	-0.34029	2.02905e-14	-0.252539	4.27647e-06	-0.347036	1.25635e-09							-0.34102	1.12781e-33	-0.333611	8.61116e-08
Ehd1													0.040377	0.00996704											-0.0571251	0.00705145																			0.0378499	7.17991e-05
Ehd3	0.0505112	0.0058787			0.100926	0.00344917							0.0635341	5.17816e-06																			0.0507419	0.00165344											0.0487309	9.12282e-07
Ehd4													-0.0772723	0.000110881																															-0.0423685	0.00541347
Eid1																																	-0.120792	0.000431183											-0.0689803	0.000454239
Eid2													0.0664786	0.0039491	0.145816	0.0087294	0.193522	0.00131932													0.13138	5.7432e-07	0.0690735	0.00745583	0.0867933	0.00078605									0.0618374	1.57816e-06	0.149	0.00633115
Eif1	0.29426	9.74376e-43	0.183217	1.07781e-10	0.157096	9.21634e-09							0.221996	2.09963e-58	0.350832	1.24705e-18	0.225161	8.64427e-10	0.232419	0.000191073	0.205437	5.13783e-05									0.255115	4.34474e-36	0.192355	1.96154e-34	0.150721	4.51903e-13	0.0966903	8.97323e-06							0.151217	1.19363e-48	0.307137	1.11636e-14	0.223621
Eif1a	0.296341	4.2114e-15	0.329805	2.46825e-17	0.239948	1.02103e-06							0.298539	2.63509e-41	0.378151	1.27886e-09	0.371634	5.61975e-09	0.252886	0.00340784	0.618914	1.28964e-14									0.38291	3.59686e-34	0.201775	1.43808e-12	0.155706	1.48946e-06	0.247605	3.67888e-13							0.205508	7.98374e-35	0.213865	0.00114946	0.277625
Eif1ad	0.208087	6.30549e-11			0.140761	6.21773e-05							0.151901	1.30805e-17	0.304189	2.72644e-06					0.234551	0.000910254									0.24168	2.34902e-13	0.156898	7.78036e-15	0.099723	5.6131e-05	0.116972	4.07855e-07							0.132085	7.70223e-28	0.315658	3.55075e-07	0.271528
Eif1ax	0.128531	0.00702956	0.0897539	0.00526731									0.115715	2.93158e-08																	0.130235	9.66495e-05	0.14921	4.95705e-06	0.140015	2.14351e-05	0.114758	5.54661e-05							0.142683	3.42566e-17	0.172471	0.00328974
Eif1b	0.125859	0.00154172	0.142799	0.00354124									0.136141	1.42755e-09	0.170034	0.00957082	0.250476	0.00234778													0.175999	3.5732e-09			0.0970579	0.00791325	0.0922812	0.000131503							0.0740354	1.02687e-07
Eif2a													-0.0604032	0.00146043
Eif2ak1																																	0.0444675	0.00719322											0.035961	0.000197449
Eif2ak3																																													0.0197442	0.00281069
Eif2b3	0.0882619	0.00197151			0.0724803	0.00789742							0.0730462	5.42414e-08							0.133185	0.00823743									0.123137	3.318e-05			0.0672353	0.00626443	0.0652924	0.00709448							0.063381	8.03635e-09	0.18911	0.00144824
Eif2b4													0.0475459	0.000669539
Eif2b5	0.128738	1.55953e-05	0.104717	0.00759957									0.102362	1.21353e-09																	0.0842825	0.000258322	0.116368	2.05889e-07			0.0882794	0.00485227							0.098986	2.89615e-14
Eif2d													-0.0120116	0.0058987
Eif2s1	0.259066	1.76388e-13	0.222895	1.33347e-09	0.28799	1.36005e-10							0.274187	1.66507e-38	0.249594	1.32791e-05	0.31524	9.60486e-08	0.248958	0.00142485	0.391652	5.32967e-07									0.297736	2.61442e-25	0.18484	3.06024e-11	0.137824	2.14636e-06	0.155749	7.4312e-07							0.168201	3.08449e-26	0.297308	7.68768e-09	0.247753
Eif2s2	0.622475	8.41489e-68	0.373483	3.90629e-22	0.400012	1.43153e-20							0.479278	2.02179e-116	0.524283	3.85036e-20	0.456177	2.76583e-13	0.452624	3.17576e-09	0.542431	1.46644e-13									0.490753	5.20608e-59	0.412473	4.54001e-51	0.24412	4.147e-18	0.260105	7.23102e-16							0.317927	6.93501e-89	0.363606	3.1175e-10	0.345809
Eif2s3x																																													0.0724839	7.05874e-06
Eif3a	0.362367	3.37959e-24	0.255678	5.82377e-09	0.281929	3.21207e-11							0.316963	1.23447e-50	0.412354	2.39556e-13	0.262768	8.71556e-06	0.406225	8.0464e-09	0.399627	6.61629e-07									0.375463	3.27302e-39	0.296933	1.30375e-28	0.202314	2.33862e-11	0.293564	1.37785e-20							0.271322	1.42213e-66	0.325848	4.4977e-09	0.30583
Eif3b	0.265095	2.06923e-12	0.235558	6.78315e-09	0.147702	0.00891729							0.236896	4.66216e-27	0.279362	7.48471e-06					0.305059	0.00206671									0.256065	1.38651e-15	0.337564	8.52443e-36	0.140755	1.72542e-05	0.27234	4.51154e-20							0.265069	1.11738e-63	0.313053	4.84736e-09	0.224235
Eif3c	0.143637	0.000458961											0.101302	5.77502e-07																	0.112097	0.000492866	0.189952	2.14684e-12			0.183793	4.77669e-07							0.151504	2.88023e-19	0.184759	0.00743371	0.207415
Eif3d	0.205179	1.37891e-08			0.119728	0.00229385							0.145203	4.5563e-15	0.191571	0.0014013			0.29184	0.000132132											0.171891	4.3808e-10	0.163143	1.28016e-10											0.123189	1.8668e-15			0.209373
Eif3e																																	0.0988985	2.99111e-05			0.123032	2.47034e-06							0.0862854	1.84827e-10
Eif3f													-0.0508331	0.00749278																	-0.105182	8.58694e-05
Eif3g	0.226773	3.56178e-11	0.100436	6.61893e-05									0.163228	2.31283e-21	0.238886	4.97658e-05	0.289993	0.000701587			0.322942	5.74864e-05									0.246889	4.12056e-16	0.215069	2.95915e-17	0.0997657	0.00242193	0.171438	8.61972e-11							0.170977	3.45531e-33	0.253524	3.77225e-06	0.224133
Eif3h																															-0.0828012	0.00442935															-0.191346	0.000239262
Eif3i																																													0.0450917	8.21203e-05
Eif3j1	0.218844	7.50411e-16	0.126621	0.000685525	0.120906	0.00235037							0.174507	2.28327e-25	0.222817	0.000817165	0.283372	4.7288e-06													0.213094	1.026e-12	0.0916124	0.000256706			0.0774902	0.00571735							0.0888793	3.74731e-10	0.190742	0.00365354
Eif3m	0.0379847	0.00314166											0.0751187	5.16096e-05																			0.0844769	0.00159273											0.0497455	0.00464063
Eif4a1	0.402885	2.0615e-49	0.422286	1.81321e-33	0.390111	2.96361e-22							0.42974	4.35493e-111	0.416107	1.21168e-16	0.235321	3.44837e-08	0.27022	0.000619568	0.355816	2.32269e-07									0.323064	1.52351e-31	0.280426	1.36462e-42	0.343485	1.51764e-35	0.306881	1.23983e-26							0.326666	4.01234e-112	0.364456	3.90229e-14	0.187017
Eif4a2	-0.349029	3.50168e-19	-0.269419	2.08019e-11	-0.279068	1.63027e-09							-0.32379	5.08617e-46	-0.219387	0.00394624															-0.204867	6.57214e-09	-0.243278	4.6731e-17	-0.245135	5.95654e-17	-0.256143	5.39698e-16							-0.2584	1.67059e-55	-0.193315	0.00196361	-0.210498
Eif4a3	0.171018	9.35514e-06			0.161443	0.00253629							0.153786	1.19174e-11							0.278637	0.00539736									0.161441	1.30544e-07	0.130453	1.74298e-05	0.0760367	0.000760365	0.135769	8.52432e-06							0.117286	3.43828e-15
Eif4e	0.277557	8.66751e-16	0.169994	1.82542e-07	0.181389	0.000187828							0.224773	2.20664e-30	0.304889	3.58012e-07	0.229286	0.000240932	0.242886	0.00151806	0.326125	0.00231352									0.269624	1.12921e-19	0.236919	4.4205e-19	0.154191	8.91069e-08	0.132598	3.37065e-06							0.190977	3.01011e-37	0.37715	1.99138e-11	0.200147
Eif4e2	0.141451	0.000125471											0.107587	1.14098e-07	0.205927	0.00605848															0.155782	1.69535e-05	0.103049	5.81207e-05	0.123899	0.000108962									0.107322	1.49401e-11
Eif4ebp1	0.512391	1.2869e-48	0.307129	1.76189e-18	0.311138	1.19701e-16							0.394467	8.30637e-91	0.425282	2.72137e-13	0.448345	2.10575e-10	0.514391	2.01397e-11	0.615362	5.15943e-16									0.501045	6.50384e-58	0.465521	1.73643e-64	0.176561	2.279e-10	0.301512	1.212e-22							0.334069	1.77789e-104	0.489504	4.51223e-20	0.383423
Eif4g1	0.198539	8.495e-07			0.137419	0.00162537							0.169494	1.37645e-15																	0.136065	0.000705391	0.211851	1.32334e-17	0.190539	4.2158e-12	0.193704	4.60622e-08							0.20491	7.49635e-40	0.272457	5.16742e-06
Eif4g2	0.138302	0.00418914	0.173084	1.46153e-05									0.144504	1.47511e-11	0.210708	0.00131446	0.262108	0.000193625	0.261723	0.00179622	0.605644	3.34319e-10									0.283862	3.24693e-20													0.0682072	3.27983e-05			0.198773
Eif4g3																																													0.0449809	0.00740188
Eif4h	0.0849749	0.0043364											0.0829766	0.000363936																	0.0986114	0.00412248													0.077058	1.89475e-06
Eif5													0.109207	9.27183e-07																			0.0870277	0.00639695											0.0521268	0.00260279			0.287579
Eif5a	0.187268	1.38045e-12	0.21087	1.20961e-08	0.155126	0.000453636							0.212817	1.66807e-29	0.341411	1.01629e-10	0.192356	9.58608e-05			0.275915	0.000333641									0.277261	1.19472e-22	0.1581	1.12138e-16	0.197029	8.01975e-14	0.225566	6.77155e-15							0.209712	8.06679e-50	0.454751	1.27761e-19	0.137159
Eif5b	0.380366	2.3029e-21	0.196403	1.51579e-06	0.323913	2.15279e-11							0.30227	8.69685e-41	0.36741	3.63393e-10	0.230339	0.00224543	0.256488	0.00369484	0.42483	0.00138565									0.308146	1.81984e-21	0.309975	1.44524e-28	0.192017	5.17564e-09	0.212365	4.2567e-09							0.252962	2.29942e-51	0.320885	2.86425e-08	0.315202
Eif6	0.239496	1.3667e-11			0.25709	5.09145e-09							0.212249	4.58792e-24	0.255211	9.18926e-06	0.284292	1.13049e-05	0.249447	0.000266237											0.230439	3.19352e-16	0.200093	4.55785e-17	0.153311	3.93142e-08	0.147906	2.81297e-07							0.176895	3.57868e-37	0.257924	9.63259e-06	0.198853
Eipr1																																													0.0263774	0.00701622
Elac2	0.091974	8.04846e-05											0.0541728	4.28829e-06																	0.0873568	0.000126418	0.084931	1.923e-08			0.0568274	0.00735405							0.0579825	8.12001e-11	0.17081	0.000602777	0.121333
Elavl1	0.161831	6.65676e-05			0.219751	4.39737e-06							0.156436	9.39993e-12																	0.119443	0.000559422	0.168635	1.88979e-09	0.0951925	0.000291943	0.160901	8.29785e-06							0.14471	8.01363e-20
Elf1													-0.106592	0.000297075																			-0.172464	3.111e-06											-0.116079	2.87238e-08
Elk3													-0.058641	0.00409753																	-0.0932419	0.00195845
Elmo2																																													-0.025217	0.00333856
Elmod3
Elob			0.176626	1.39147e-05	0.178838	8.62291e-05							0.150636	8.89281e-13																			0.0829368	0.000620435	0.125744	3.37491e-05									0.101698	8.5499e-13
Elovl1	0.0869841	0.00781146			0.104797	0.00616052							0.108451	3.86506e-09																	0.152621	9.38825e-06	0.100741	7.03608e-05											0.0792065	5.2049e-10	0.270481	8.75314e-06	0.256121
Elovl6													-0.0579988	0.000116269
Elovl7													0.0228177	0.00721982																	0.0398187	0.00804388
Elp4																																													0.0305569	0.00660207
Elp5	0.121237	1.52354e-05											0.0867505	1.42736e-07																			0.0788437	2.50222e-05											0.0501136	6.58158e-06
Emb																																													-0.0584766	0.00095755
Emc2													0.0783097	0.000895448
Emc3
Emc4													0.0299006	0.001234
Emc6	0.083842	0.00207737	0.144606	5.2564e-05	0.128668	0.00211318							0.115729	2.269e-11	0.245889	4.1112e-05	0.312127	2.66981e-08			0.335576	0.0003855									0.233124	3.63966e-16	0.0679044	0.00294502			0.105316	0.000602627							0.0838251	3.32941e-09
Emc7	0.114161	0.00449326											0.0642503	0.000976434
Emc8													0.0607593	0.00651798																															0.0399928	0.000315388			0.198389
Emc9													-0.0265854	0.00680495																															-0.0220992	0.00166749
Emcn																																	-0.0720847	0.00201015											-0.0625219	8.51723e-06
Emg1	0.152775	0.000623609											0.0787953	0.0016797	0.19099	0.00355174					0.252087	0.00476307									0.157992	1.4545e-08	0.128491	7.99876e-05			0.101639	0.00543962							0.109105	1.01229e-10
Emid1																															-0.0782241	0.00122055
Emilin2																					0.0417741	2.50739e-05									0.033722	0.00639848															0.105447	9.6298e-05
Eml2																															-0.0824476	0.000417818					-0.0790614	0.00149374							-0.03946	0.000495522
Eml3
Eml4	0.107523	0.00520936											0.0970057	5.14329e-06																	0.131126	0.000217735	0.0942517	0.000584984	0.0916246	0.00783953	0.117588	0.00044425							0.101772	3.73827e-11			0.244252
Emp3	-0.237479	3.14378e-10	-0.194249	1.10107e-05	-0.206267	3.10582e-05							-0.210551	8.10362e-22							-0.246844	0.00554444									-0.114227	0.000294297													-0.0575548	0.000621679
Emsy
Enah	0.0916867	5.4339e-09	0.0953618	1.80836e-05	0.105812	2.31456e-08							0.093157	1.02305e-23
Endog																															0.0831402	7.81318e-05	0.0452749	0.000318943											0.0385556	1.02144e-06
Eng	-0.129486	0.00513384											-0.106848	3.22576e-05	-0.226427	0.000333677															-0.127308	0.000144984													-0.072181	0.000119989
Enho					-0.0593845	0.00802053							-0.0370948	0.000537839																			-0.0272577	0.00347802											-0.0360294	4.00981e-08
Enoph1																															0.075322	0.0074107
Enpp5													-0.0483031	0.00484816																															-0.040859	0.000910766
Ensa																																	-0.0826868	0.00697671											-0.0479064	0.00962736
Entpd7													0.0271185	0.00518373																															0.0255706	0.000113106
Eny2													0.109156	4.62323e-06																			0.125055	8.95597e-06			0.114709	0.000199275							0.110661	8.14125e-13
Ep300
Ep400													0.0355599	0.00634794																															0.0470998	0.00133128
Epb41																																	0.0746401	0.00407285	0.132187	5.20546e-05									0.0844819	1.08346e-07
Epb41l3
Epb41l4aos													-0.0263589	0.00232736
Epb41l4b													-0.0652758	0.00699291																			-0.0959863	7.64921e-05			-0.112872	0.00103745							-0.0992254	1.02824e-11
Epm2aip1																									-0.0045534	0.00740707
Epop	0.0796179	5.35987e-08											0.0569224	1.67277e-10			0.180762	0.00104666													0.148664	9.64587e-10	0.0585594	1.21933e-08	0.0329269	0.00563855									0.0480215	5.29273e-15			0.175085
Eprs	0.26613	3.91875e-13			0.170348	0.00547861							0.195626	4.41246e-19	0.302637	1.14726e-06	0.344274	4.86145e-06			0.351892	0.000993236									0.292838	4.20542e-20	0.303639	4.39578e-28	0.107277	0.00360293	0.187706	3.35058e-07							0.208833	6.30688e-38	0.370843	4.98177e-12	0.331734
Eps15l1			0.108385	0.00464168									0.0623615	0.000316039																			0.0576877	0.00494029
Eps8	0.1331	2.26932e-10	0.126255	0.000123932	0.143902	6.04796e-06							0.134123	1.17735e-21																	0.0774989	0.00134763													0.0319782	0.00682071
Epsti1																																													-0.0730525	4.04449e-05
Erap1																															0.0986591	0.00670451
Erc1
Ercc2																																													0.0225044	0.000153583
Ercc8					0.0650793	0.00468124							0.0488019	3.43107e-05																			0.0408475	0.00591791											0.0368546	2.73405e-06
Erf													0.0332692	0.00839884																	0.083231	2.19219e-05
Ergic2			0.107491	0.00554492									0.0903328	1.23759e-08																			0.0841431	0.000875384											0.0585527	4.76438e-05
Ergic3																															-0.145318	5.75234e-05
Erh					0.0988509	0.0066194							0.0937078	2.27696e-07			0.276665	0.000790861													0.191475	3.49041e-08	0.123871	1.55227e-05	0.0604613	0.00427127	0.108351	0.000836368							0.106049	2.17947e-12	0.234769	0.000119465	0.264849
Eri1													-0.0118503	0.00219273																	0.119984	0.00225857
Erlin2													-0.0331739	0.0054596
Ern1																																													-0.0372138	0.000995511
Ero1l													0.0476221	0.000187223
Erp29																																	0.0927096	0.00412333											0.0809252	2.03872e-06
Erp44																																	0.0838487	1.43426e-06			0.0859054	0.00473816							0.0809148	1.74668e-10
Esam													-0.0913718	0.000321953																	-0.0733437	0.00483817	-0.0978983	0.000349852	-0.123132	0.00110473									-0.106315	8.66127e-10
Esco2
Esf1	0.152584	0.000123594											0.132661	1.71339e-09	0.198108	0.00194978	0.149031	0.00190225			0.295856	0.00384772									0.196185	6.03125e-12	0.0491362	0.0034615											0.0683244	9.69585e-06
Espn																																													-0.0180429	0.00489265
Esrra
Esyt1													0.0696634	5.81525e-05																	0.0936015	0.00344734			0.0629708	0.00441771									0.0498358	0.000112635
Esyt2																																	-0.0715636	2.53366e-06											-0.0660731	7.70362e-10
Etf1	0.273415	6.75005e-17	0.158695	8.73471e-07	0.210405	1.24733e-07							0.231751	7.17699e-36	0.304572	5.05497e-08	0.394198	3.26732e-10			0.355256	3.71996e-07									0.31797	1.35946e-26	0.178787	3.54548e-14	0.0830709	0.00432346	0.164726	5.39206e-08							0.149759	3.84375e-26	0.217058	0.000127059	0.314828
Etfb													0.0649525	0.00965981
Etfbkmt																																													-0.0438867	4.38189e-05
Etfrf1																																	-0.0531737	0.00136474											-0.0369195	0.00100305
Ethe1																																	-0.0657213	0.00530166											-0.0529468	4.86217e-05
Etv3	-0.0933523	0.00622784			-0.151464	0.00261749							-0.103098	6.20481e-08																			-0.0919506	8.34734e-05											-0.0763079	4.00104e-07
Etv5																																	-0.047284	0.000137095											-0.0289249	7.54047e-05
Etv6													-0.0590774	0.00109973																															0.0350947	0.00031606
Eva1b													-0.072173	0.000951035																															-0.0467184	0.0062524
Evi2																															-0.0490682	0.00438843
Evi2a
Evl															-0.153143	0.000648781															-0.0764584	0.000760761													-0.0157316	0.0064405
Ewsr1	0.0921277	0.000350634			0.154682	0.00175498							0.109669	4.37956e-08	0.236994	0.000439718															0.179478	6.80083e-09
Exd2																									-0.0157187	0.0056964
Exo1
Exoc5			0.0789317	0.0025477									0.0559837	5.60968e-05							0.207735	0.00789958															0.0848695	0.000283674							0.0370316	4.48993e-05
Exoc6
Exosc1	0.146852	9.87055e-06	0.0844156	0.000875278	0.117946	0.00812405							0.130111	1.37983e-13							0.411617	8.6408e-09									0.211603	1.6639e-10	0.167722	6.17407e-13	0.124113	1.90919e-05	0.100264	0.000897295							0.142448	9.97006e-25	0.250992	3.1575e-05	0.247606
Exosc2													0.0690015	0.000255687																	0.110518	0.000839199
Exosc3													0.0590324	0.00832606			0.153927	0.000252781													0.118219	2.2307e-06
Exosc4	0.130236	0.000297534											0.0942035	1.86697e-06																	0.103657	0.00171596			0.0359903	0.00031843	0.0952305	0.00388522							0.060978	6.064e-08	0.196356	0.00365354
Exosc5																																			0.0719065	0.00184903	0.1067	0.00697467							0.0735317	6.59465e-06	0.252821	6.16079e-06
Exosc7													0.0879825	0.000362774			0.0878696	0.00222364													0.124162	0.000107609													0.0765458	6.21345e-06	0.187636	0.00243659
Exosc8					0.0954192	0.00359426							0.0618235	0.000206475	0.237962	0.000105401	0.204472	0.00104022													0.172004	6.88107e-09			0.115951	3.14944e-05									0.0746992	2.35784e-06
Exosc9													0.0486321	0.0014062																															0.0256063	0.000181576
Ext2																																			-0.138964	5.81901e-06									-0.0909082	9.26629e-10
Eya1													-0.0812146	1.17894e-06																	-0.0959346	0.000325506
Eya2	-0.146642	1.05314e-10	-0.147258	0.000178326	-0.145701	4.01277e-06							-0.156424	3.85498e-24	-0.0884003	0.00217069															-0.063712	2.24466e-05	-0.09038	2.43759e-06	-0.109306	6.02309e-05	-0.132458	3.22533e-06							-0.114098	1.99485e-20
Ezh1															-0.133484	0.00863267																													-0.0444509	0.000378634
F11r													-0.0202649	0.00074267
F2r					-0.104355	0.000223959							-0.0584857	6.0738e-06																			-0.0703887	2.77575e-05			-0.0986742	4.30018e-05							-0.0630596	1.77088e-09
F2rl3																															0.0765684	0.0034849			0.061997	0.00313485									0.0368721	0.000511756
F630028O10Rik															-0.1793	0.000224718															-0.0639847	0.0012344
F830016B08Rik					-0.0954323	0.00265602							-0.0715422	2.09404e-07																			-0.0410236	0.00195586											-0.0456081	9.49643e-07
Faap20																	-0.183619	0.00256598													-0.131209	3.88264e-05	-0.096587	0.000209606											-0.0952085	8.44037e-10
Fabp5																															0.166294	0.000343388	0.0637272	0.00703347	0.101382	0.000482431									0.0722785	1.58506e-08
Fads1													-0.0691461	1.21716e-05
Faf2													0.00814397	0.00021555
Fahd1																																	0.071725	0.00099833											0.0563761	3.28842e-07
Fahd2a																																													-0.0397604	0.00232616
Faim
Fam103a1																															-0.102186	0.0065764	-0.0745237	0.00874843											-0.0661389	5.99202e-05
Fam104a													0.106476	1.88038e-07			0.174378	0.00720637													0.11359	2.67235e-05													0.0534911	0.00204996
Fam105a	-0.0494857	0.000385509											-0.0207085	0.000548215																	-0.0794762	0.000348863
Fam107b	-0.234301	5.96677e-08	-0.250105	2.07695e-07	-0.298662	1.6409e-08							-0.2549	4.07808e-25	-0.325438	2.85377e-06	-0.192269	0.00556234	-0.239693	0.00143709											-0.282071	1.07987e-15	-0.099679	0.00652531			-0.159356	0.0001285							-0.108347	1.67835e-08
Fam110a													-0.0742947	0.0062681	-0.152332	0.0043539					-0.219395	0.0059462									-0.165065	7.56275e-10	-0.0937191	0.0010171			-0.155819	0.000588191							-0.101889	1.61754e-08
Fam110b													-0.0430069	0.00245397
Fam110c													-0.0455094	0.00437445																			-0.0507894	0.00981136											-0.0468185	4.58673e-05
Fam111a	-0.0795101	0.00987501											-0.0592731	0.000402608
Fam118b													0.0373618	0.000669479																	0.0603164	0.00114699			0.0454923	0.000739595									0.0262147	0.000535471
Fam126a																																													0.0072067	0.0072692
Fam126b													-0.0364181	0.00419703
Fam129a																																													-0.0348849	2.25901e-05
Fam129b													0.0204116	0.00895839																															0.0357756	2.99009e-07
Fam133b	0.142382	0.000390871											0.0987619	2.43023e-05																			0.0729335	0.00417127
Fam136a	0.116331	0.000801678	0.123969	0.000325576									0.109148	1.02536e-09			0.222137	0.00309316			0.279784	0.000213996									0.222091	4.22376e-12			0.0815707	2.061e-05									0.0629781	5.71735e-07			0.188651
Fam162a																																													0.0180841	0.0057735
Fam169b
Fam171a1			0.099189	6.02306e-05	0.0800026	0.00591305							0.0650152	2.29941e-09
Fam173a	-0.0997854	0.00553074											-0.0575093	0.0092907																																	-0.258952	4.14349e-06
Fam174a
Fam174b																																	0.068348	2.60597e-05											0.0484309	9.33966e-08
Fam184a	0.0665084	2.84301e-05			0.101162	0.000553477							0.0691552	9.77194e-11							0.100091	0.00337928									0.0587497	3.68917e-05	0.0223192	0.00387867											0.0270485	4.38159e-05
Fam185a
Fam189b																																													-0.0291068	0.000208513
Fam192a																																													0.0323743	0.0029319
Fam206a													0.0342262	0.00259556																			0.0439307	0.00507895											0.0262784	0.000632079
Fam208a	-0.0914487	0.00370875											-0.0732228	7.81954e-05																	-0.101228	0.00204573
Fam208b	0.116542	0.000806829			0.136332	0.00260346							0.118521	4.12116e-10							0.327467	4.56442e-06									0.140959	1.54015e-05	0.100963	4.76947e-05			0.10637	0.00245732							0.0838923	7.62276e-09
Fam210a																																			0.0365262	0.00155269									0.030831	0.0011262
Fam212a			0.15152	0.00379309									0.114322	8.73034e-06																			0.104208	0.000593266											0.0555515	4.96526e-05
Fam213a			-0.139523	6.1506e-06									-0.0985556	7.76845e-06																															-0.0787178	1.12098e-06
Fam214a					-0.0871915	0.00629029							-0.0437169	0.00140959																	-0.0557349	0.00258883
Fam216a																																	0.069272	0.0018774											0.0482947	0.000196129
Fam219b																															0.0768824	0.00128955
Fam220a																															0.0665082	0.00303166	0.0742192	8.0609e-05											0.0539304	3.84039e-06
Fam241b													-0.0320907	0.000266309																					-0.0427062	0.00660384	-0.0456183	0.000181861							-0.0361561	1.18119e-09
Fam3a																									-0.0395826	0.000286327
Fam3c					0.0995855	0.00423486							0.0374031	0.006151																	0.0790411	0.00127985
Fam43a	-0.109657	6.79553e-05											-0.0737144	6.92618e-07																															-0.0573619	6.00511e-05
Fam46a															-0.163959	0.000226804	-0.0946666	0.000779632													-0.118692	2.93474e-09
Fam49a													-0.0333244	0.00553292	-0.108753	0.00532299															-0.0555832	0.00323781	-0.040712	0.00229089			-0.0657551	0.00178682							-0.0505911	1.39012e-09
Fam49b													0.055674	0.00749568
Fam60a					0.0693567	0.00940561							0.0674881	4.99184e-06	0.219324	0.00430255															0.15747	1.15338e-06
Fam69b	-0.236162	6.46612e-12	-0.129461	0.00412766	-0.17342	8.02947e-06							-0.18284	5.33182e-19																			-0.0906443	0.0019539											-0.068408	4.84419e-05
Fam84b			0.0493871	0.00569584									0.0326935	0.000159909																	0.0651388	0.00012987													0.0285709	0.000433484	0.0796835	0.00119964
Fam91a1																									-0.127507	0.00751446
Fam96a													0.09131	0.000357366																							0.104895	0.00505243							0.0891382	9.97858e-08
Fam96b													0.0292293	0.00526309																															-0.0492932	0.00301907
Fam98a					0.0724277	0.00666184							0.0426124	0.00084868	0.142531	0.00561194					0.180896	0.0023384									0.132791	1.61702e-09	0.0587056	0.00137691			0.063571	0.00166123							0.0499309	3.56908e-07	0.141888	0.00444919	0.128172
Fam98c																																	-0.0744577	0.000430514											-0.0489488	5.33709e-05
Fancf															0.111221	0.00119921
Far1																																	0.0685923	0.00117926	0.0412322	0.00419187									0.0507171	1.59523e-06
Farsa	0.167544	1.20052e-06											0.119586	1.24124e-11																	0.127452	3.39411e-05	0.113808	1.79094e-09	0.0197938	0.00344752	0.138168	8.29785e-06							0.0977759	6.02541e-18	0.194305	0.00620945
Farsb	0.187959	1.45944e-11											0.13231	1.08721e-15	0.182563	0.00768102					0.21234	0.00231332									0.160309	3.37115e-08	0.141862	8.00554e-09			0.152974	6.55243e-10							0.131122	8.05803e-23	0.214562	0.000838034
Fasn																															0.106225	0.000368215	0.0856402	7.40046e-06			0.0636803	0.00989324							0.0568632	1.04165e-07	0.216291	0.000571189	0.184284
Fastkd1																															0.0499099	0.00546234													0.0265018	0.0014983
Fastkd2																																													0.0274289	0.00750632
Fastkd3																															0.0707308	0.000687236
Fau	-0.0614232	9.51704e-06			-0.0578822	0.00559325							-0.0584924	1.88039e-12	-0.150719	2.68741e-07	-0.124413	1.94749e-05							-0.892935	0.00728706					-0.120505	1.9357e-16													-0.024637	0.000650022	-0.103237	0.000366627	-0.0870236
Fbl	0.197677	3.53665e-08	0.197089	2.55051e-06	0.154153	2.53471e-05							0.202067	3.3932e-23	0.295563	1.24924e-06	0.188637	0.0028661													0.213768	9.84041e-12	0.103356	0.0024739			0.142362	0.000265221							0.123267	3.71779e-12	0.294807	1.23185e-07
Fbxl12													-0.0462479	0.00664815																															-0.0142882	0.00577341
Fbxl14																																															0.0671379	0.00353722
Fbxl20													-0.0484747	0.00116796																	-0.0609306	0.00747209	-0.05116	0.00589194											-0.0459632	9.26701e-05
Fbxl5																																													0.0452111	0.000749625
Fbxl6																																													-0.0259667	0.00134521
Fbxl8	-0.0412032	0.00601978											-0.0422892	1.16468e-05																	-0.0575032	0.00359356													-0.0209593	0.00110585
Fbxo25																															-0.0385458	0.00617274
Fbxo28																																													-0.0222619	0.00198544
Fbxo30																																													-0.0335142	0.00067437
Fbxo31																																													0.0318325	0.00256495
Fbxo32													-0.0399713	0.000106422	-0.122546	7.76764e-07															-0.0589791	5.63999e-06			-0.0443514	0.00826891	-0.0498631	0.00945232							-0.0383967	1.63493e-07
Fbxo4																									-0.0573101	0.00859192
Fbxo5
Fbxo9	-0.181713	1.99767e-06											-0.112535	5.70358e-06																			-0.156277	1.43956e-07	-0.114809	0.00363698									-0.112231	4.86016e-10
Fbxw10													-0.0290925	0.000885132
Fbxw11																																	0.0442532	0.0041598											0.0364879	0.000128745
Fbxw4													-0.0322817	0.00248337	-0.133142	0.00297873					-0.112256	0.00789958									-0.110455	1.4637e-07
Fbxw7	0.0889938	0.000230094			0.111034	0.00180442							0.0786422	1.34508e-07
Fbxw8													0.0261343	0.00998966
Fcf1	0.103907	0.000510055											0.0643313	7.03619e-05																															0.053922	0.00022921
Fcgrt													-0.0728658	0.000250482																			-0.0818943	3.67576e-05			-0.0944231	0.00316447							-0.0903022	1.43476e-11
Fcho2													-0.0882425	0.000226715																	-0.087689	0.000365699					-0.102389	0.00610627							-0.0771937	3.49755e-06
Fchsd2																															0.00268575	0.00885977
Fcor													-0.0329293	0.000358214
Fdft1													-0.043928	0.00681566																			0.0554475	1.74298e-05			0.0422299	0.00349138							0.0366465	1.27353e-07
Fdps	-0.150789	3.25913e-07											-0.0969918	5.28299e-08																			0.0977063	3.97557e-05			0.0927366	7.49481e-05							0.0844555	1.67813e-11
Fech													-0.0346385	0.00527371
Fem1a					0.0899874	0.00100805							0.0516987	5.0412e-05																	0.055169	0.00856445	0.0490393	0.00546858											0.0414323	4.75366e-05
Fen1
Fermt3																															-0.12504	0.000535012
Fes													-0.0484656	0.0018074
Fez2													-0.0189862	0.00379014
Ffar2															0.156278	0.00550252					0.255639	4.30677e-05									0.166902	8.36905e-10																	0.220349
Fgd1													-0.0178991	0.00577147
Fgd2																																													-0.0221515	0.00858087
Fgd3													-0.0248394	0.00635258
Fgd4																															-0.0633269	0.0092188
Fgd5													-0.0413773	0.00856335																															-0.0304636	0.00973533
Fgfbp3			-0.05398	0.00752197									-0.0312664	0.00856892
Fgfr1																																					-0.075092	0.00044153							-0.0427166	5.59069e-07
Fgfr1op																																													0.0223506	8.36125e-05
Fgfr1op2																																													0.0574272	0.000172944
Fggy																																					-0.0659837	0.00947517
Fgl2
Fh1																															0.0986852	0.00526506
Fhod1													-0.0461156	1.32357e-07																															-0.0231989	0.00129557
Fip1l1													0.0999927	9.40234e-07																	0.129011	0.000754574			0.105996	0.00269093	0.108694	0.00625434							0.0975248	6.33834e-09
Fjx1																																													0.024304	6.96736e-05
Fkbp11	0.153239	1.01813e-06											0.0968322	3.6095e-11																	0.0811968	0.000417397	0.180269	1.14286e-14	0.0782476	0.000816726	0.129088	8.90756e-09							0.145007	4.14433e-31	0.152786	0.00139963
Fkbp1a	0.151118	0.00119657	0.149205	0.00151425									0.151563	2.13291e-10	0.21228	0.00430255	0.21325	0.00514784													0.169525	2.02778e-07			0.17192	4.98989e-08	0.132949	0.000635086							0.129213	2.50265e-14	0.205059	0.000572261
Fkbp2													0.0699072	0.00608918																			0.105974	2.12001e-05	0.144333	2.72683e-07	0.177906	7.97988e-09							0.150169	1.03946e-22
Fkbp3																																	-0.138529	2.18303e-05											-0.0979289	4.23119e-08
Fkbp4																																					0.127772	5.50631e-05							0.0630996	3.1645e-05	0.210748	7.82183e-05
Fkbp5					0.112882	0.000543064							0.0800342	3.89897e-08																	0.12671	3.09302e-05
Fkbp7																															-0.0509281	0.00432206
Fkbp9	-0.0740419	0.00923684																																											-0.0383189	0.00253198
Fli1	0.131138	0.000122413	0.212299	1.75099e-05	0.18664	0.000639699							0.170574	1.47087e-13																			0.129759	5.64193e-07	0.20393	5.75937e-10									0.14374	7.37312e-17
Flii																																					0.106377	0.00152315							0.0604351	6.41403e-05
Flot1	0.154295	2.88034e-06	0.126174	0.000393089	0.17497	7.09151e-05							0.13903	1.47087e-13							0.311659	0.00184275									0.155692	1.33339e-05	0.0826252	0.0008036	0.0831131	0.00884059									0.0548774	1.54238e-05
Flot2	0.108584	1.74721e-06			0.0987552	0.000664409							0.0865395	6.79756e-10																	0.0774737	0.00116265	0.0729726	3.27148e-06											0.0568357	1.91896e-08
Flywch1					-0.141578	0.00227363																																							-0.0492213	0.00108581
Fmnl1																																			-0.0835063	0.00864361	-0.095236	0.00412019							-0.0711546	4.44256e-07
Fmnl2																																													0.0369847	0.000855505
Fmo5													-0.0379881	0.00425932																	-0.048731	0.00123957	-0.038935	0.000869512	-0.0724724	0.000763605	-0.0664053	0.00074535							-0.0611603	1.1041e-13
Fn3k																																			-0.0402824	0.00238402	-0.0519394	1.23512e-05							-0.0341037	1.98234e-10
Fnbp1																																													-0.0559802	0.00163817
Fnbp1l					-0.143664	0.0008635							-0.0797871	3.50705e-05
Fnbp4													0.0668216	0.00232178																	0.13181	7.34056e-05	0.0981512	4.12803e-05											0.0859715	1.7999e-09	0.197846	0.00461475
Fndc10	-0.0450037	0.00244606
Fndc3a	0.110305	8.10228e-06	0.142492	0.00129984									0.103697	5.05724e-08							0.256026	0.00579742									0.148813	9.38825e-06	0.111754	1.38143e-06	0.0776827	0.00554517	0.12706	0.000334465							0.0999565	2.86554e-11			0.146146
Fndc3b
Fnip1																															-0.0645273	0.0072048
Fnip2																																													0.0166892	0.00776393
Focad																																													-0.0157713	0.000193748
Fopnl
Fos	-0.290407	0.00159984	-0.380717	2.24209e-05	-0.310019	1.00625e-05							-0.326458	4.39735e-12	-0.600661	4.7859e-09	-0.625819	2.91949e-09	-0.62906	0.000739811	-0.564957	3.32468e-05									-0.677728	1.77064e-26	-0.377524	6.42143e-10	-0.281014	3.14246e-05									-0.298761	5.95238e-19	-0.360758	0.00565101	-0.296425
Fosb	-0.357752	3.21899e-09	-0.419796	5.77752e-10	-0.332215	0.000136239							-0.380556	8.63696e-26	-0.555407	2.86542e-10	-0.57555	1.43949e-13	-0.656775	2.01016e-07	-0.417642	4.49994e-05									-0.584393	2.08849e-37	-0.213375	1.86361e-05	-0.263989	1.01876e-06	-0.302776	4.2188e-07							-0.260487	7.67093e-21	-0.308219	0.00134475
Fosl2																																													-0.0473447	0.00100576
Foxa3																																													-0.0350814	4.25533e-05
Foxk2	0.0581033	0.0066247											0.0511674	7.704e-06																	0.0629844	0.00708347	0.0403184	0.00499844											0.0286197	0.000524702
Foxn2					0.0692653	0.000200367							0.0424501	4.75687e-06																															0.0201146	0.00186171
Foxn3													-0.109516	4.58885e-05																	-0.159782	1.59616e-05	-0.154905	2.9876e-07	-0.108822	0.00673256	-0.160453	9.25664e-05							-0.152871	3.34055e-17
Foxo3													-0.0731139	4.30497e-06																	-0.0878487	0.000394489
Foxp1					-0.17138	0.00713434							-0.131331	9.45572e-07					-0.321785	0.0018729	-0.276696	0.00106489									-0.248565	1.32381e-11	-0.212518	3.88134e-12	-0.163512	7.21755e-06	-0.191041	1.36188e-06							-0.198978	1.3569e-27	-0.26718	0.0003778	-0.28024
Foxp4	0.0402853	0.00449334											0.027165	0.00173965																															0.026275	0.00197556
Fpgs													0.0489757	9.61665e-05	0.165864	0.00628351																	0.0587223	9.55146e-05											0.0496115	5.274e-08
Fra10ac1																																													0.033262	0.0065567
Frat2					-0.150751	0.00886537							-0.104173	2.58981e-06	-0.174817	0.00432419	-0.178896	0.00321056			-0.394109	0.000364135									-0.229488	9.52019e-13													-0.0774773	4.37294e-06
Frg1													0.0379124	0.00521991
Frmd4b					-0.0672443	0.00518413							-0.0540012	3.03833e-06																	-0.0532382	0.000288673			-0.067592	1.76058e-05									-0.0450953	9.81352e-09
Frmd6																															0.0668825	0.00234144
Frrs1																																													-0.0668101	0.000140257
Frs2																									-0.0451432	0.00128523
Fstl1																																													-0.0390852	0.000393487
Fth1	-0.0812867	3.26664e-05											-0.0595133	1.80471e-06											-1.39794	0.000745331							-0.051663	0.00130036											-0.0474238	3.76305e-07
Ftl1-ps1																																	-0.0509658	0.0076525											-0.0433289	6.99334e-05
Ftsj3	0.259818	5.46545e-18	0.151499	3.80937e-07	0.250928	5.8429e-11							0.240172	6.19009e-40	0.368588	5.41636e-09	0.315159	1.941e-06	0.372029	2.73944e-06	0.354523	8.74123e-06									0.368148	4.90628e-30	0.259983	5.19632e-29	0.172627	2.2021e-11	0.163785	4.19649e-08							0.218108	7.78527e-56	0.339969	8.18085e-08	0.346917
Fubp1	0.270133	1.19374e-12	0.195056	5.53916e-05	0.284987	2.05726e-08							0.261784	8.08824e-30	0.247744	7.37253e-05	0.287965	3.89396e-06	0.39561	5.2528e-07	0.394979	6.7644e-07									0.328045	9.89494e-28	0.267696	5.39564e-22	0.145401	7.0438e-05	0.229773	4.47318e-11							0.21836	3.96355e-39	0.283964	9.85903e-07	0.232826
Fuca1																															-0.129921	3.06626e-05	-0.0743361	0.00797304											-0.0528082	0.00101919
Fuca2													-0.0533406	0.00132802			-0.153877	0.00890653													-0.11376	6.1671e-05													-0.0409209	0.000383393	-0.167164	0.00286751
Fundc1																															-0.0592075	0.00467035
Fus	0.169801	6.80116e-06	0.154907	0.000395634	0.169274	0.00016935							0.171491	3.25709e-17	0.19136	0.00357092	0.18797	0.00402606													0.194373	1.32337e-10			0.116358	0.000329704									0.0821355	1.15896e-06	0.172705	0.00841139
Fut7																															-0.113493	7.58699e-06
Fut8	0.60196	2.15963e-51	0.548303	5.6307e-39	0.502868	1.12148e-26							0.554724	1.70928e-123	0.289077	0.000121073	0.300778	0.00167403	0.375366	3.63556e-05	0.39682	0.000143607									0.339546	1.43598e-19	0.509685	3.8207e-63	0.392375	4.30937e-34	0.52926	5.22563e-50							0.48261	1.45277e-153	0.237634	0.0059931	0.323198
Fxn
Fxr2	0.0795389	0.00392896											0.0493301	0.00344642
Fyb
Fyttd1																															0.0919064	0.00951118	0.0934453	4.46084e-06			0.101553	0.00176467							0.0774148	5.81145e-09
G3bp1	0.164691	7.40521e-09	0.165951	0.000186061	0.203716	9.16875e-06							0.200072	1.68547e-20	0.285575	1.72601e-06	0.197956	0.00046483	0.352799	1.151e-06	0.323459	1.73377e-05									0.282125	1.85508e-24	0.23412	3.33243e-23	0.171748	5.75937e-10	0.324627	6.3241e-24							0.248446	4.93805e-59	0.269258	6.77672e-07	0.22142
G3bp2	0.107753	0.00105153											0.100904	7.05634e-07																	0.11387	0.00258535	0.14663	4.03772e-07											0.112607	1.5267e-11	0.196998	0.00169418
G430095P16Rik													-0.0935343	2.09403e-07																	-0.0700903	0.00729737	-0.0827518	0.00011953			-0.110601	0.000436271							-0.0843291	4.03179e-10
Gaa																																													-0.0559752	0.000450392
Gab2			-0.00529574	0.00683069																											0.0441119	0.0097047
Gabarap																															-0.103775	0.00164846	0.130135	2.53061e-06	0.126698	2.24676e-05									0.099913	6.07227e-10
Gabbr1													-0.0372732	0.00391487
Gadd45a			-0.0708333	0.00392444	-0.0649473	0.00244979							-0.0490174	5.84287e-06	-0.126009	0.00747888															-0.0776018	4.63951e-05	-0.0332424	0.00759568			-0.0636072	0.000274183							-0.0402806	3.11427e-08
Gadd45b																																	-0.0437151	0.00849267			-0.105875	7.22166e-05							-0.0494223	7.72356e-06
Gadd45g	0.0910774	4.21534e-05	0.125851	0.000918775	0.0894873	0.00815091							0.0921824	4.03109e-10																	0.0481935	7.48466e-05	0.0695958	1.05245e-06	0.122328	2.35489e-07									0.0769375	1.25218e-11	0.0607581	0.00555722
Gadd45gip1	0.243095	5.4915e-15	0.156375	6.70292e-05	0.145718	0.000162831							0.18961	3.65019e-26			0.31621	7.18111e-05	0.291664	7.8516e-05											0.252553	9.72584e-16	0.148214	1.39532e-09	0.113413	4.03287e-05	0.13742	2.82602e-05							0.1392	9.53678e-22	0.191948	0.000649422	0.204134
Galc													-0.0435596	0.00233247																															-0.0311216	0.00275073
Galk1																															0.102433	0.00818921					0.0896708	0.00540418
Galm																																													-0.0304307	2.15725e-05
Galnt1																																					0.103396	0.00418085							0.0609688	0.000273432
Galnt10																															-0.0368514	0.00856445
Galnt12																																	-0.043862	0.00198527
Galnt6	0.0687176	0.00203714	0.118343	0.00548075									0.0739296	3.3819e-06																	0.0961397	0.00156071	0.18665	1.5602e-19	0.0782924	0.00632501	0.127587	3.54301e-06							0.137527	4.69092e-30
Gan																																													0.0196424	0.00341164
Ganc																																													-0.049521	9.68467e-06
Gapdh																																																	-0.121404
Gapvd1			0.109881	0.00357798									0.0601452	6.81067e-05																							0.103116	0.000452971							0.0648256	3.35843e-06
Gar1	0.198905	1.73843e-12	0.189628	7.78421e-07	0.278365	1.03582e-10							0.241607	8.80874e-34	0.353715	8.97372e-11			0.34272	3.34711e-06											0.287179	4.83167e-20	0.112618	0.000596577			0.156067	6.36017e-07							0.129503	2.69377e-15	0.256782	9.43171e-06	0.163913
Gars	0.257314	1.21045e-14	0.0950527	0.00752327	0.151317	0.000319868							0.185862	1.87696e-24							0.328187	2.7323e-06									0.190988	2.93693e-11	0.155378	9.61781e-13			0.140377	4.38043e-06							0.127421	3.52639e-21	0.189189	0.0098879
Gart													0.0627155	0.0061417																	0.156803	1.56147e-05			0.0949678	6.87161e-05	0.0894828	0.00129182							0.0857846	6.71296e-10	0.247258	7.6618e-05
Gas6																																													-0.0262826	0.00142829
Gata2					-0.161705	0.00669663																																							-0.0796378	0.000379522
Gata3													-0.0598458	0.00063544																															-0.0295579	0.00762274
Gatad2a			0.114156	0.00131337	0.0699368	0.00284323							0.0772195	1.30113e-06																	0.0842163	0.00791315	0.0987595	1.94169e-06	0.0736247	0.00218529	0.12186	7.87885e-07							0.0984466	8.20616e-17
Gatb													-0.0186756	0.00990439
Gatc													0.0310238	0.00943067
Gatd1													-0.0791845	0.000228626																			-0.0817447	0.00277075											-0.0529182	0.00139593
Gatm																															0.135619	1.20825e-05
Gatsl2													-0.0263691	0.00537862																															-0.0245594	0.00122443	-0.0655472	0.00566307
Gatsl3													-0.0286738	0.00618276
Gbp2																																													-0.0422107	0.00509402
Gbp3																																					-0.0822603	0.00505243							-0.0483889	0.000153583
Gbp4																																	-0.0336905	0.0049633											-0.0359235	0.000254646
Gbp5	-0.0558734	0.00803692											-0.0402778	0.00870699																			-0.044058	0.00120201	-0.0719245	0.00337355	-0.0716889	0.0012698							-0.062003	1.27204e-09
Gbp8																																													-0.0307033	0.00204804
Gcat													-0.0525167	0.000252983																			-0.0422283	0.00852115											-0.0354184	0.000122037
Gcc1													0.0270203	0.00184941
Gcdh	-0.0613664	0.000806718											-0.0435929	0.000182114											-0.0334656	0.00802143																			-0.0315042	0.000109963
Gch1																																	0.0491382	0.00830016											0.0344049	0.00359106
Gchfr																																													-0.0265133	0.00165615
Gclc																															0.105073	0.000331802													0.0496236	1.42424e-05
Gclm	0.120433	0.00028004			0.151075	0.00232678							0.131761	8.45821e-11	0.235181	0.00453653															0.181392	1.12667e-07	0.132427	1.18045e-07											0.116036	1.86198e-12			0.198081
Gcn1l1													0.040344	0.00792382																															0.0552554	3.40083e-05
Gcnt1																															-0.0455919	0.00364141
Gcnt2					0.172843	0.00628435							0.106225	5.95102e-05
Gcsh																					0.252153	0.00415013									0.183398	8.76831e-08	0.0730465	4.90033e-05			0.0922193	0.0030369							0.0706122	1.32533e-11	0.305427	1.31619e-06
Gda	0.192771	1.65524e-09	0.20892	2.18545e-06	0.293905	2.07342e-12							0.215609	4.00799e-28																			0.144073	1.26458e-08	0.138337	1.6873e-05	0.170433	5.73376e-08							0.141641	1.29412e-20
Gdap10																																			-0.0482357	0.00374771
Gdap2																																													0.0223606	0.000915011
Gem																																	-0.107582	4.35028e-10			-0.110655	0.00265636							-0.0991264	5.00375e-14
Gemin5															0.202205	0.00147323	0.12956	0.00106793													0.157886	1.41849e-11	0.0805837	1.23949e-05	0.059019	0.00348789	0.0714543	0.00246088							0.0734858	5.31742e-14	0.197359	0.000249969
Gemin6
Gemin7			0.0913566	0.00409601									0.0647631	0.000150651			0.165484	0.00412965													0.0814262	0.00247241	0.0497044	0.00309569											0.0438846	0.001377
Get4	0.0524697	0.0030702	0.103599	0.00185243									0.0621334	4.19219e-06																			0.076993	3.14658e-05	0.0743414	2.41876e-05	0.076524	0.000594546							0.0766033	2.10286e-14	0.171833	0.00134067
Gfer	0.116274	3.89475e-05	0.151222	2.6821e-06									0.131078	2.06352e-15	0.312937	3.80181e-07	0.205967	0.00155534			0.206306	0.00789958									0.220671	4.47137e-14	0.119834	4.92858e-07			0.129743	4.44288e-07							0.110431	2.30686e-17	0.185745	0.00649904	0.209412
Gfi1	0.1637	4.33557e-12	0.15923	4.07999e-06	0.107598	0.000953743							0.126228	1.72399e-19																			0.0444032	0.000329154	0.092683	9.73599e-06									0.0623781	2.08339e-10
Gfi1b			0.0251226	0.0061164									0.0279498	0.000376925																															0.0304164	0.0059826
Gfm1
Gfpt1	0.0814	0.00938989			0.127915	0.00261749							0.0945211	1.17264e-08																			0.0877256	2.88621e-05											0.0568962	5.15852e-06
Gga2													-0.033827	0.000919959
Ggact																									-0.0356407	0.00119158
Ggct																															0.0562131	0.00649356	0.0586516	0.00229951											0.0411823	0.000173477
Ggh																									1.27402	7.35222e-08					-0.0851453	0.00448856
Ggps1																									-0.199599	0.00651092
Ggta1													-0.0270276	0.000966242
Gid8													0.0530817	0.00292679																			0.0550844	0.00888376											0.0351202	0.00593144
Gigyf1																															-0.0832677	0.00169779
Gigyf2			0.124652	0.00380668																																									0.0503575	0.00298966
Gimap1	-0.332098	2.49811e-14	-0.302292	4.17289e-13	-0.246307	2.56303e-06							-0.322845	1.55731e-40	-0.298364	1.62595e-05															-0.200719	2.49331e-07	-0.253332	1.09146e-17	-0.234165	3.91859e-14	-0.216384	3.53222e-09							-0.254817	1.94877e-47	-0.227032	0.00351379
Gimap3																																													-0.0217397	0.00471056
Gimap5	-0.14638	0.000643416			-0.178848	0.000881834							-0.145388	6.67103e-09																			-0.169894	6.3188e-09	-0.171061	3.349e-06	-0.175337	8.03676e-06							-0.174197	2.47053e-22
Gimap6	-0.576059	2.50984e-37	-0.450223	4.59712e-22	-0.427785	1.41826e-13							-0.528861	2.69763e-80	-0.513629	4.004e-11	-0.346446	1.2901e-05	-0.448763	5.24879e-05											-0.432882	7.19806e-27	-0.442892	3.10119e-41	-0.27216	3.88288e-15	-0.372496	1.09966e-18							-0.392846	1.13867e-80	-0.377479	7.53049e-08	-0.324215
Gimap7
Gimap8	-0.0788837	0.000929774											-0.0802664	8.56533e-07																			-0.068272	1.54154e-05	-0.0876136	0.00262651	-0.0781546	0.000964677							-0.0842028	3.44709e-14
Gimap9													-0.0817606	9.27087e-06																			-0.0603788	0.00976842											-0.0514641	0.000301472
Gin1													-0.0448677	0.000831104
Gins1																															0.0641984	0.00617703
Gins2																																													-0.0257348	0.0024939
Gins4																																													-0.0363647	0.00625959
Git1																																													0.0314817	0.00370808
Git2													-0.100924	0.0003905	-0.240814	0.00106825															-0.240893	5.02401e-10													-0.0676982	0.000775148	-0.265326	0.000245642	-0.303352
Gkap1																																	0.0499238	0.00213588											0.0565896	0.000209308
Glb1																																													-0.0453339	0.000340055
Glipr1	-0.128351	0.00408095											-0.098704	5.03112e-05																	-0.124091	0.002487					-0.10472	0.00484035							-0.0908683	5.54718e-08
Glmp																															-0.11795	4.7799e-05
Glrx													-0.0807481	7.32129e-05	-0.186578	0.00165671															-0.154672	6.85702e-08	-0.0818083	0.00269472											-0.0820167	4.65891e-08	-0.180605	0.00274778
Glrx2																																													0.0490235	0.00830091
Glrx3	0.158251	0.000482129											0.11105	7.39438e-07																	0.116219	8.73723e-05	0.124311	9.07841e-06			0.102156	0.00756567							0.106154	9.82312e-13	0.195519	0.00147141
Glrx5													0.0860644	1.34353e-05							0.263308	7.63183e-05									0.193053	1.35018e-11	0.148765	1.33786e-09											0.116475	3.68884e-15	0.275253	3.75283e-07
Gls																															0.119931	0.00191567
Glt8d1																									-0.113062	0.00981612
Gltp	-0.119556	0.0080901																																											-0.0594033	0.00287548
Glul	0.268768	3.00125e-10	0.156115	0.000506085	0.165779	0.00784195							0.177692	4.87258e-12																			0.187279	2.74696e-10	0.123048	0.00262452									0.125293	1.96161e-11
Gm10073																																													-0.0520811	0.0094025
Gm10076	-0.19508	2.34482e-10	-0.180762	1.51739e-05									-0.168798	1.22467e-17							-0.173116	0.0030154											-0.24106	2.40719e-23	-0.125248	1.23126e-05	-0.192894	1.8379e-10							-0.18089	6.94816e-38
Gm10419													-0.0526194	0.000125756
Gm11423																																													-0.0163617	0.00781178
Gm11713																																	0.0335377	0.00783259
Gm12185													-0.0407394	9.13427e-05																			-0.0242528	0.00931702											-0.0250581	0.000542843
Gm12216													-0.0661898	0.00257714	-0.192641	0.00161037
Gm12454													-0.0332579	7.2598e-05																	-0.0419051	0.0095713													-0.0162743	0.00193225
Gm13012
Gm13212													-0.0422247	0.0026576
Gm15261	0.0665006	0.00862455	0.116732	2.09187e-06									0.0809356	3.88857e-10																															0.013647	0.000224686
Gm15545																															-0.0487652	7.92087e-05													-0.0187424	0.000171444
Gm16070			-0.0546968	0.00298522									-0.0346328	0.000114785																															-0.0224407	0.000673329
Gm16124													-0.0487283	0.00208614																															-0.0475185	7.09974e-05
Gm16140																																													-0.0383555	0.0040476
Gm16286	0.222579	6.54143e-09			0.138432	0.00975593							0.17155	4.37373e-15																	0.0794596	0.00594498	0.121877	3.90271e-06											0.0955946	5.47448e-10	0.176475	0.00128475	0.239987
Gm16503													-0.0254214	0.00144558
Gm1673																																													-0.0465382	0.000357229
Gm16845
Gm17018													-0.0232851	0.0054163
Gm19590	-0.326935	4.89313e-15	-0.257589	7.50632e-07	-0.338988	1.36806e-09							-0.314326	2.58753e-35	-0.440674	2.17487e-13	-0.267968	2.67943e-06	-0.42811	7.91489e-06	-0.402841	1.63947e-07									-0.397139	1.41865e-34	-0.231895	1.54719e-14	-0.207998	1.10066e-07	-0.262955	7.22093e-11							-0.234436	7.14201e-35	-0.408777	5.80819e-12	-0.190471
Gm2000																															-0.0903027	0.000134341
Gm20186																																															-0.0463013	0.00606401
Gm20234																																													-0.0170287	0.00720334
Gm20300													-0.0201854	0.00711221
Gm20342													-0.0330569	0.00649525	-0.301542	5.16386e-05	-0.176768	0.00851444			-0.308293	0.000495206									-0.234188	2.10171e-12															-0.273672	2.37582e-05	-0.202911
Gm20696																															-0.0691389	0.00274213													-0.0273078	0.000104076
Gm26632																																													-0.0346272	1.68515e-05
Gm26802													-0.0383102	4.94726e-07																	-0.0277045	0.000221757	-0.0517742	1.53751e-05	-0.0672483	3.55818e-06									-0.0489472	3.15051e-13
Gm26890													0.0157357	0.00705423
Gm26917																															0.134847	0.00245345
Gm28187													-0.0445876	2.44186e-05																					-0.0700986	0.000795107
Gm28875	-0.075386	0.00284091											-0.0738592	1.78475e-06																			-0.075721	4.46052e-05											-0.0621527	5.57432e-07
Gm2a																															-0.133522	0.0010307	-0.0532263	0.00929168			-0.111406	0.00119655							-0.0708441	9.12955e-07	-0.206567	0.00314095
Gm32554
Gm32856																																													0.0202971	0.00241725
Gm36839																															-0.0282343	0.00162867
Gm4070													-0.0320992	0.000179013
Gm42047
Gm42418	-0.255093	1.09224e-10	-0.210174	2.93593e-06	-0.284178	6.37675e-09							-0.258978	3.29038e-28																			-0.320184	7.8014e-26	-0.312873	3.65638e-25	-0.356252	1.52925e-26							-0.331946	2.19772e-82
Gm43568	-0.0497843	0.0018421											-0.0516494	5.86512e-07																	-0.0598506	3.15249e-07	-0.0434692	3.76917e-05											-0.0461242	9.18144e-10
Gm4707																																													-0.0171801	0.00815406
Gm47283																																	0.258665	1.35599e-22	0.152774	3.97841e-07	0.222012	1.58619e-10							0.222877	8.30263e-45
Gm4841													-0.0320576	4.4354e-05
Gm4951	-0.139186	5.36607e-09	-0.167629	4.83412e-06	-0.159946	2.96228e-05							-0.163726	1.63554e-22																			-0.11951	4.91668e-11	-0.145832	2.79267e-07	-0.166096	2.54792e-11							-0.140975	3.11138e-29
Gm5111	-0.0582519	0.00878446	-0.0691102	0.00217571									-0.0568256	4.07068e-06																	-0.134962	0.00073572	-0.0731146	2.00862e-07											-0.0506351	2.99452e-09
Gm5148	-0.0418341	0.0012585			-0.0604344	0.00209847							-0.0529389	3.02256e-09																			-0.0334316	0.0065737			-0.057211	0.00251071							-0.0391241	3.45219e-07
Gm5914
Gm973																																													-0.0405897	2.07328e-05
Gm9856																																													0.0294542	0.00293148
Gmfb
Gmfg															-0.233567	0.00026833															-0.16844	6.58382e-07															-0.264008	2.46528e-05
Gmip
Gmnn	-0.0697369	0.00487932	-0.00168677	0.00440914									-0.0375012	0.00640329																															-0.0283651	0.00831315	0.156043	0.0028883
Gmppb	0.172655	3.63887e-14	0.100712	7.99407e-05									0.123369	6.75226e-21	0.166002	0.00151359															0.117708	2.68819e-07	0.10771	6.0034e-12	0.0583408	0.00026592	0.0730268	0.000553506							0.0856568	4.35452e-21	0.148652	0.00474234	0.176747
Gmpr	0.0678092	0.00100543	0.0384506	0.000186025	0.0784343	0.00534907							0.0592486	3.52159e-11																			0.0414066	0.00797828			0.0402759	0.00402269							0.031603	1.5985e-06
Gmpr2																																													0.0506926	0.000880878
Gmps	0.157942	3.63628e-05											0.117178	1.64193e-08	0.238716	0.000541315	0.324893	3.23438e-06													0.226255	3.48025e-11	0.121906	6.5567e-06	0.129447	1.54154e-05	0.125326	0.000544376							0.132522	2.37667e-17	0.259444	2.19355e-05	0.340848
Gna15	-0.0752309	0.00520664											-0.060102	0.00019256																	-0.062644	0.00348601	-0.077402	1.6012e-05											-0.0593451	5.99054e-08
Gnai3																																			0.106494	0.00244402									0.0678472	5.31772e-05
Gnas	-0.0986193	0.00154315											-0.0842573	2.51658e-06							-0.212338	0.00361497									-0.0995453	0.000463967	-0.0977059	1.58828e-05											-0.0461353	0.00344024
Gnat2													-0.0207755	0.00201019																			-0.0196517	0.00665772
Gnb1													0.0978761	0.000189085																															0.0598237	0.000438599
Gnb2																															-0.108514	0.000606479
Gnb4																															-0.0818977	0.00155594					-0.0889528	0.00100283							-0.0523133	7.69123e-06
Gng11	-0.210792	7.80689e-06	-0.185383	6.43222e-05	-0.244975	1.09254e-06							-0.223622	7.34891e-19			-0.183688	0.00236647													-0.162978	7.34781e-07	-0.145201	7.55603e-05			-0.122612	0.00665327							-0.12544	8.46748e-11	-0.184422	9.31845e-05
Gng2	-0.1032	0.000102834			-0.129489	0.00119302							-0.0979683	5.38343e-09																			-0.0688821	0.0019857			-0.112214	0.000165682							-0.0813262	2.74454e-10
Gng5																																					0.0961261	0.00174312							0.0556268	0.000126346
Gnl1													0.0457601	0.000580914																			0.0683295	0.00031991											0.0613001	9.02111e-08
Gnl2													0.0714782	0.000350476																	0.1438	5.24237e-05	0.0595461	0.00375722											0.0751641	3.33645e-08	0.193512	0.00473275
Gnl3	0.284075	1.53902e-12	0.256902	3.81757e-09	0.31586	4.13313e-10							0.302567	9.26154e-38	0.486771	6.84288e-20	0.514937	4.33139e-14	0.324497	8.41533e-05	0.762143	8.04662e-20									0.557098	1.74545e-55	0.216277	4.3981e-12	0.19934	1.27604e-12	0.267634	5.91222e-15							0.236038	2.60148e-43	0.457971	2.91444e-17	0.297359
Gnpda1																															-0.088694	3.15249e-07													-0.0292247	0.00162193
Gnpnat1	0.0838107	0.00496899											0.0835786	4.03706e-08																			0.0974712	7.78518e-07			0.0996845	0.000649045							0.0834807	3.87242e-12
Gnptg																																													-0.0362414	0.00169131
Golga1																									-0.0301414	0.00651092									0.0163706	0.00378978									0.0301967	0.00279465
Golga4	0.194846	2.74882e-09			0.161777	0.000460948							0.136087	1.96761e-11																	0.135847	0.000442797	0.172884	6.0034e-12			0.158052	4.93618e-06							0.133503	5.31915e-19
Golgb1																																	0.148634	7.71037e-10			0.0975208	2.28531e-05							0.106455	9.44357e-15
Golph3													0.0438239	0.00404914
Golph3l																																													0.0418938	5.91938e-05
Golt1b					0.0750298	0.00939839							0.0578015	3.36336e-05																	0.095328	0.000118071	0.0544619	0.000721631	0.0584692	0.000372201									0.0578755	9.5361e-11
Gorasp2	0.198171	4.44301e-12			0.176891	4.59655e-07							0.151661	3.34658e-20																			0.157719	1.57666e-14	0.0917449	0.00123312	0.0849194	0.000549217							0.1227	2.09221e-24
Gosr2	0.0988922	6.23914e-05											0.081968	3.52344e-08																			0.0581001	0.00495562			0.0663019	0.000451943							0.0533309	8.9907e-08
Got1					0.109994	0.000351654							0.0575559	2.47299e-05	0.148496	0.00875522															0.105286	0.000198774	0.0799481	1.40584e-07											0.0536668	3.60014e-09	0.167902	0.00197256
Gp9													-0.0584887	0.00104797																			-0.0701462	0.000494564			-0.0860406	0.00312042							-0.075056	8.27204e-10
Gpaa1													0.0146151	0.00937428																					0.0524914	0.0036844
Gpat4	0.10919	1.30645e-05											0.0724416	3.42053e-07			0.174891	2.88197e-05													0.135863	3.54153e-10	0.0996939	4.59475e-09											0.0804667	1.30107e-14
Gpatch11																									-0.126661	0.00415161							0.0357657	0.00986514
Gpatch2																																	0.040669	0.0086738
Gpatch2l																																													-0.0227575	0.00262569
Gpatch4	0.112994	0.00214457											0.103862	1.40996e-08	0.261368	8.13123e-05	0.221043	0.00103143			0.399707	6.23149e-09									0.28175	6.38285e-19	0.158363	2.07648e-09			0.144315	4.39897e-06							0.140392	1.14837e-20			0.172147
Gpbp1	0.114028	0.00908911											0.100396	7.6407e-06
Gpcpd1													-0.0574147	8.73708e-05
Gpi1	-0.136133	0.00166056											-0.0737287	0.00267602																	-0.119677	9.04915e-05													-0.0581147	0.00034045
Gpn1	0.0811426	0.000966049											0.0700931	3.86375e-06																	0.165488	2.9845e-08	0.0707142	0.00260111			0.0845334	0.00119655							0.0567278	1.04171e-05
Gpr160															-0.115175	0.00513809															-0.0793265	2.90743e-07
Gpr180	0.0767675	0.00267107											0.0414053	0.00167508																																			0.149708
Gpr89																									-0.0298088	0.00589521							0.0811562	6.78209e-06											0.0518514	4.00451e-07
Gprc5b	-0.042211	0.00822156	-0.0765714	0.00652953	-0.0770906	0.00652874							-0.0621594	1.12807e-09							-0.0824046	0.00305729									-0.0641026	1.03814e-08													-0.0323822	5.14451e-05
Gps1	0.284674	1.02145e-17	0.194871	2.30964e-07	0.146661	0.00227363							0.228119	1.74312e-30	0.245508	4.61832e-05	0.293645	1.0105e-06			0.287222	0.00234792									0.273133	2.39681e-20	0.236293	2.68003e-20	0.14738	1.56536e-07	0.203591	1.24352e-12							0.20534	6.16069e-44	0.31141	5.02175e-08	0.234817
Gps2													0.0664502	0.00015713
Gpsm3													-0.0798737	0.00084868																	-0.159189	4.36276e-06	-0.10334	0.000480556											-0.0746	2.10807e-05	-0.179111	0.00785041
Gpx1	-0.137204	0.00125431			-0.178419	0.000446905							-0.11902	2.60951e-07	-0.234497	7.82803e-06	-0.18856	0.000856582			-0.311637	3.0565e-07									-0.224276	5.87472e-17																	-0.196055
Gpx4	-0.139584	3.78155e-05											-0.0814153	4.28901e-05																			-0.142056	3.63646e-09											-0.092544	2.54363e-10
Gramd1b													-0.0388289	7.05417e-05
Gramd4
Grasp																	0.120806	0.00402606													0.0744729	0.00236787
Grb10	0.10819	0.00554963											0.0819366	0.000276306																			0.0798501	0.00456441											0.0576531	0.000455789
Grb2																																													0.056795	0.0052694
Grcc10																																													-0.0391198	0.00307232
Grhpr
Grina																																	0.0586574	0.000212982											0.0442108	0.000231156
Grk2	-0.120979	0.00124296											-0.120115	7.83219e-09																	-0.189187	6.39937e-08															0.120156	0.00732084
Grk3													-0.0507592	0.00237808																	-0.0792352	0.00174106
Grn													-0.0752172	0.000514734																	-0.108366	0.000992375													-0.0649645	7.00536e-05
Grpel1	0.141716	4.69587e-07	0.12186	0.00155032	0.107881	0.00950413							0.127987	2.07555e-14	0.305093	9.19939e-08															0.194047	2.20279e-09					0.100578	0.00261608							0.0738553	7.72998e-07			0.222245
Grpel2																															0.0703492	0.00200886
Grwd1	0.125332	2.4415e-09	0.146021	9.6966e-06	0.11857	0.000606409							0.136503	3.66801e-21	0.232177	0.000352938	0.284699	3.07788e-07			0.268143	3.03909e-06									0.260128	2.75526e-19	0.0933274	1.10038e-05			0.108766	5.21842e-05							0.0950416	1.37968e-14			0.165551
Gsap																																	-0.0363095	0.00440895											-0.0356751	1.54578e-05
Gsdmd	0.0995769	3.91522e-05											0.0512348	0.000196764																															0.0400697	0.00136144
Gse1	0.144908	2.05534e-06											0.121008	8.84979e-11																			0.139866	5.74622e-08	0.132729	1.15177e-05	0.148457	2.33426e-05							0.142865	7.58147e-21
Gsk3a																																													0.0415727	0.000969116
Gsn													-0.0211638	0.00091563
Gspt1	0.376526	3.51971e-22	0.230346	8.80591e-08	0.292758	4.52598e-10							0.314634	1.98243e-44	0.416972	2.75182e-13	0.298002	6.73721e-08	0.338724	3.79317e-06	0.525199	5.78137e-10									0.399175	1.1102e-38	0.326861	4.17573e-34	0.210684	2.61309e-12	0.313282	4.0731e-20							0.295682	4.34276e-72	0.43483	4.43503e-15	0.329821
Gsr																															0.110304	0.00175304	-0.045738	0.000738685	0.0290177	0.00530087									-0.0119609	5.99202e-05
Gsta4																																													-0.030754	0.00702822
Gstm1	-0.172179	0.000200718	-0.173529	0.000391788	-0.177565	0.00473967							-0.199248	6.31067e-15							-0.250416	0.00796517									-0.17656	1.02062e-06	-0.156517	1.32446e-06	-0.188574	1.00342e-07	-0.245389	4.07408e-11							-0.211904	3.62818e-30
Gstm7
Gstp1																																													-0.0334871	0.00659697
Gstt1			-0.0701666	0.00984032									-0.0421579	0.00111251																			-0.0426196	0.00577477											-0.0302857	0.00274092
Gstt2																																	-0.0640216	0.00276258	-0.106577	6.69741e-06									-0.0795766	3.99295e-11
Gstt3													-0.0460627	0.000183337																	-0.0625004	7.65936e-07													-0.0305895	0.000654746
Gstz1
Gtdc1																																													-0.00749423	0.00946146
Gtf2a2													0.0599517	0.000669479
Gtf2b																																													-0.0452463	0.00618647
Gtf2e1
Gtf2f1			0.134932	7.34398e-06									0.0993668	2.55362e-08																															0.058393	6.18173e-05
Gtf2f2													0.0620224	1.66568e-05	0.162289	0.00784967	0.192524	0.000695718													0.172034	1.59564e-11			0.0589282	0.00504354									0.0541216	2.57351e-07
Gtf2h3																																	-0.0375935	0.00699649											-0.0373864	0.00261492
Gtf2h5	0.133512	0.00095927											0.0726188	0.000260323																															0.0415994	0.00431568
Gtf2i																																	-0.0291563	0.00866973
Gtf2ird1																					-0.154358	0.0073514									-0.0723374	0.0010897
Gtf3c1																																	-0.0602889	0.0065872											-0.03288	0.00909108
Gtf3c6	0.120364	1.61073e-05											0.099736	5.13709e-10																			0.0852546	0.000169006											0.0715776	1.72187e-07
Gtpbp2	-0.0842245	0.00495997											-0.0697519	0.00127472	-0.187203	0.0034406															-0.131316	7.63749e-05
Gtpbp4	0.315031	1.41294e-16	0.156699	1.05511e-05	0.179653	0.000124668							0.241275	3.22441e-31	0.342397	2.34678e-10	0.407938	1.28075e-10	0.35731	1.0649e-06	0.586014	1.85046e-12									0.397765	1.11407e-40	0.180933	1.16467e-10	0.17381	1.49578e-08	0.147919	0.000130343							0.18511	6.83639e-29	0.395839	1.29244e-13	0.266812
Gtpbp8																									-0.0925483	0.00751806
Guca1a	0.0521864	0.000698686											0.0676164	6.09429e-07																							0.0899356	0.000985757							0.0602264	7.01038e-06
Gucy1a1	-0.0817078	0.00218945			-0.157753	3.30373e-05							-0.119914	2.71019e-12																			-0.0840074	2.42266e-05											-0.0875247	4.56267e-11
Guk1													0.0604204	0.00822708																			0.103498	0.000402127											0.0769788	3.1361e-07
Gulp1													-0.0248315	0.00051532																															-0.0238551	0.00217359
Gusb
Gyg													0.0614083	0.00173593																			0.0757385	0.00155319	0.116434	5.84569e-05	0.0753626	0.0041662							0.0895656	1.63707e-11
H13	0.13255	0.00304644																													0.143993	6.11794e-06	0.191074	1.50651e-11	0.109456	3.76493e-05	0.0977579	0.000105374							0.135595	1.83476e-22			0.187523
H1f0					-0.109652	0.00107966																									-0.178869	1.19087e-05	-0.0998231	0.00399834	-0.118535	0.00950456	-0.180736	0.000128051							-0.133052	1.87422e-11
H1fx													-0.0706852	0.00559135																	-0.185522	0.000233872													-0.0608301	0.000978449
H2-Aa																																					-0.0597248	0.00437101							-0.0660182	0.000279677
H2-D1													-0.066136	6.1896e-05											-1.38878	0.00981612					-0.149735	5.95313e-09	-0.114142	2.55856e-10	-0.141773	1.1567e-10	-0.17458	1.07482e-15							-0.143085	2.50911e-40	-0.157199	0.00333674	-0.131265
H2-DMa													-0.109581	1.42825e-05	-0.274479	0.000134923															-0.187897	1.31245e-06	-0.182486	4.59789e-10	-0.218581	1.12915e-11	-0.15537	0.000105338							-0.184697	7.48172e-27	-0.262005	6.39576e-05
H2-DMb1													-0.0782564	7.72802e-05																			-0.101685	7.11328e-06	-0.0998041	0.00140106	-0.133226	3.72963e-06							-0.109494	2.85879e-16
H2-K1															-0.168055	0.00284903	-0.160462	0.00297472													-0.124874	1.99636e-06
H2-Q10																																	-0.0388575	0.00205293											-0.0248989	0.00795383
H2-Q4
H2-Q6	0.0984517	0.00695323																																			-0.121238	0.00832484							-0.0861821	2.01459e-05
H2-Q7																																	-0.132071	0.00014483											-0.0989791	2.00653e-07
H2-T22													-0.0972284	8.56973e-05																			-0.103754	0.00257074											-0.0878637	6.06e-06
H2-T23	-0.206408	5.27114e-06	-0.190217	5.90099e-05	-0.230428	6.91125e-06							-0.220496	1.63708e-19	-0.234993	0.00111235															-0.207655	6.31068e-08	-0.236769	3.31719e-13	-0.19336	6.99164e-10	-0.207687	1.01286e-08							-0.227096	1.82933e-36
H2afj	0.217131	4.67465e-07											0.163996	2.65447e-13																	0.137465	0.000169752	0.118176	1.06273e-07	0.153472	2.18557e-07	0.142729	0.000261913							0.146909	4.26396e-21	0.23525	5.02455e-05
H2afv	-0.189018	1.73401e-05	-0.152472	0.00110381									-0.149671	1.22177e-09	-0.267718	1.04038e-05	-0.280375	5.44693e-05			-0.181585	0.00694092									-0.272509	1.00008e-13	-0.152495	1.82362e-06											-0.0985682	1.70926e-07	-0.299907	1.06335e-06
H2afx	0.140347	0.000200718											0.0745177	0.000991112																			0.0812466	0.000282881											0.0881195	7.15704e-08	0.187775	0.00645823
H2afy	0.0993404	0.005159											0.0656475	0.00327915																															0.0687622	5.87481e-05
H2afz	0.159438	6.61295e-05	0.128187	0.00911128	0.152558	0.00352544							0.159422	2.02046e-12																			0.0953454	0.000264528			0.157646	5.41521e-06							0.115997	4.6564e-12
H3f3a	-0.124479	3.15125e-09											-0.0764613	1.06888e-07							-0.160368	0.0042731			-1.54302	1.3827e-05					-0.113634	1.34508e-08	-0.0769452	7.12005e-07															-0.106957
H3f3b															-0.199213	0.000924791					-0.235096	0.0090255									-0.180402	1.33295e-07	-0.108011	9.24525e-05	-0.138181	1.83507e-05	-0.228516	3.48435e-15							-0.17077	2.45325e-25
Hacd1																					0.176725	0.00146491									0.169759	3.78431e-09	0.0733572	0.000355453											0.0644432	1.13541e-08	0.159204	0.00958383
Hacd3																																													0.0261224	0.00364727
Hacd4
Hacl1													-0.0351375	0.000737887																			-0.0293509	0.00251649											-0.0269849	0.000675997
Hadh	-0.14204	8.14487e-05											-0.119612	3.29929e-07																			-0.160182	7.28809e-09	-0.0929851	0.00134671	-0.114156	0.00443454							-0.127372	2.42323e-14	-0.18885	0.00720522
Hadha																																	0.0917168	0.00291368											0.0661042	0.000158644
Hadhb																																													-0.0408257	0.00208816
Haghl	-0.146263	2.01393e-07											-0.0973519	6.37311e-08																	-0.109268	0.000765329	-0.0644836	0.00855387											-0.0647221	3.92372e-06
Hars													0.0670252	2.48611e-05																			0.0780451	1.86957e-07			0.111873	4.42633e-07							0.0869828	2.54069e-15
Hat1													0.0705472	0.00359906																	0.0752912	0.00185972
Haus1																																	-0.0502788	0.00299914
Haus2																															0.0654571	0.00679463
Haus3	-0.0465066	0.00391221
Haus4	-0.116747	7.80689e-06											-0.0957595	2.07613e-08																	-0.153503	0.000212468	-0.104168	4.82169e-08											-0.0778852	3.37174e-09
Haus8																																													-0.0239232	0.00254062
Hax1	0.1609	2.65059e-09											0.0989435	5.32489e-12																	0.0888204	0.000496154	0.0916067	8.72674e-06											0.0576073	1.84365e-08
Hbb-bt			0.148226	0.00327565									0.106287	8.61897e-06																															0.0647555	0.00090935
Hbp1													-0.0583154	0.00492122							-0.224083	0.00272702									-0.157105	1.72024e-08															-0.204739	0.000183277	-0.184221
Hcfc1																																													0.0427386	0.00382089
Hcfc1r1			-0.0569622	0.00164961
Hcst																																	-0.0475675	0.00950368											-0.0336381	0.000749625
Hdac11	-0.0704886	0.00122606											-0.0594001	9.17777e-05																	-0.0576036	0.000451108													-0.0468847	2.3762e-05
Hdac2													0.0661667	0.00296255																															0.0503798	0.00680445
Hdac4	0.0868613	0.000174243											0.0805679	3.08469e-09																	0.0830027	0.000418372	0.0405035	0.00441054											0.0371825	2.49048e-05
Hdac5													-0.0400018	0.00192627																	-0.0698873	8.2957e-05													-0.0310228	0.0024365
Hdac6
Hdac7													-0.0672586	1.09792e-05																			-0.0510291	0.00362854											-0.0421667	0.000438599
Hdac8													-0.039695	0.00856335
Hdac9																																	-0.0224193	0.00647395											-0.0209106	4.03299e-06
Hdgf	0.182225	1.32942e-05	0.168188	0.000770848	0.190123	9.62251e-05							0.192876	8.10346e-17					0.241458	0.00418952											0.156166	1.42318e-07	0.177203	6.11087e-11	0.15281	3.90734e-08	0.233335	3.71211e-12							0.187898	1.45944e-33	0.196992	0.00114557
Hdgfl2																																													0.0509786	0.000121356
Hdlbp	0.235291	1.03274e-14			0.171649	2.35963e-06							0.178288	1.19248e-24			0.233318	0.00381733													0.216213	1.36639e-10	0.29243	2.84469e-27	0.170631	1.31027e-08	0.271442	9.8759e-16							0.250437	1.90995e-54	0.25976	2.17466e-05	0.202434
Heatr1	0.0754409	0.000453408											0.058342	1.85972e-07																	0.0891809	0.00265081	0.0978121	3.38924e-09			0.0486769	0.00194387							0.0683654	6.46148e-13	0.224304	5.74538e-05
Heatr3	0.104803	3.09339e-05	0.0981022	0.00657114									0.095893	2.82019e-10	0.2244	0.000309827	0.171657	0.000256363													0.180462	2.17944e-13	0.11161	1.16673e-08			0.0789493	0.00284217							0.0843834	3.8472e-14			0.149959
Heca
Hectd1			0.135751	0.00163037									0.108805	1.08899e-05
Hectd3																																													-0.0198897	0.00165843
Hells	-0.0584884	0.00159374																													0.127769	0.00262255	-0.0475575	0.00307549													0.279596	0.000391029
[truncated: 3,384 more rows]
[truncated: 15 more columns]

## Sheet: indo
primerid	logFC_HSC_Metabolism_male	adj_p-value_HSC_Metabolism_male	logFC_HSC_Quiescent_male	adj_p-value_HSC_Quiescent_male	logFC_HSC_Activated_male	adj_p-value_HSC_Activated_male	logFC_HSC_Interferon_male	adj_p-value_HSC_Interferon_male	logFC_HSC_Acute-Activation_male	adj_p-value_HSC_Acute-Activation_male	logFC_HSC_Cell-cycle_male	adj_p-value_HSC_Cell-cycle_male	logFC_HSC_pooled_male	adj_p-value_HSC_pooled_male	logFC_LSK_Primed_male	adj_p-value_LSK_Primed_male	logFC_LSK_Metabolism_male	adj_p-value_LSK_Metabolism_male	logFC_LSK_Primitive_male	adj_p-value_LSK_Primitive_male	logFC_LSK_Cell-cycle_male	adj_p-value_LSK_Cell-cycle_male	logFC_LSK_Acute-Activation_male	adj_p-value_LSK_Acute-Activation_male	logFC_LSK_Interferon_male	adj_p-value_LSK_Interferon_male	logFC_LSK_Interferon cell-cycle_male	adj_p-value_LSK_Interferon cell-cycle_male	logFC_LSK_Myeloid_male	adj_p-value_LSK_Myeloid_male	logFC_LSK_pooled_male	adj_p-value_LSK_pooled_male	logFC_HSC_Metabolism_female	adj_p-value_HSC_Metabolism_female	logFC_HSC_Quiescent_female	adj_p-value_HSC_Quiescent_female	logFC_HSC_Activated_female	adj_p-value_HSC_Activated_female	logFC_HSC_Interferon_female	adj_p-value_HSC_Interferon_female	logFC_HSC_Acute-Activation_female	adj_p-value_HSC_Acute-Activation_female	logFC_HSC_Cell-cycle_female	adj_p-value_HSC_Cell-cycle_female	logFC_HSC_pooled_female	adj_p-value_HSC_pooled_female	logFC_LSK_Primed_female	adj_p-value_LSK_Primed_female	logFC_LSK_Metabolism_female
1810022K09Rik													-0.0606798	0.00567616
1810037I17Rik																																	-0.0918272	0.000158543											-0.0829263	3.51333e-08
1810058I24Rik																																													0.0595899	0.00485385
2010107E04Rik													-0.0872558	2.52677e-05																															-0.088236	4.08495e-06
2010111I01Rik			0.0700509	0.00145741
2900097C17Rik													0.0428765	0.00933177
A430078G23Rik																																													0.00483194	0.00966154
A930029G22Rik																																													0.0220257	0.00156769
AC149090.1													0.0624983	0.00787398																					0.162002	6.57365e-07									0.0934552	1.0976e-06
AC160336.1																																			-0.127617	0.000749937									-0.102722	1.09284e-09
AL590144.2																																													-0.0326812	0.0082816
AW011738																																													0.027489	0.000342138
AW112010																																													0.04338	0.000799144
Abcg1	0.07987	0.000836686
Ablim1																																													-0.0342405	0.00387789
Acadl																																													0.0468742	0.00461334
Acat2																																													-0.0311033	0.00908303
Actg1					0.146243	4.33684e-07							0.0799875	7.40687e-07
Acy1																																													0.0223301	0.00385688
Adgrl4																																													0.0673318	0.000129803
Adrb2																																													0.045695	0.000154323
Adssl1	-0.0129808	0.00815244
Afap1l1																																													-0.05293	0.00702983
Aff4													0.0376135	0.00514896
Ahsa2													0.0445673	0.000320806
Aip													0.0602089	0.0037793
Akap13													0.0687009	0.00298288
Aldoa																																													0.0613894	0.00121821
Alox5ap	0.125566	0.00797695											0.0705514	0.000185768
Ankrd28																																													0.0334373	7.05e-05
Anp32a																																													0.058423	0.00461334
Anp32b																																													0.0552912	0.000587787
Anxa7	0.106886	0.0076374
Ap3s1													0.0431403	0.000558401
Ap4b1																																													0.023562	0.00289284
Api5																																													0.05811	0.000426665
Apoe			-0.127649	0.00413838									-0.0967731	3.75624e-05
Aprt																																													0.050629	0.00307162
Aqr													-0.0525449	0.000387602
Arhgdib													0.0626089	0.0082589
Arhgef1													-0.0469399	0.0039057
Arid5b																																													0.0546416	1.49677e-05
Arl4a	0.101319	0.00416793											0.0517449	0.00777315																							0.0898418	0.00174266							0.0538062	0.000789734
Arl8b													0.0177952	0.00804472
Arpc2													0.0634015	0.000203414
Arpc3													0.0893095	2.37262e-07
Arpc4													0.0876285	5.33146e-06																															0.0515195	0.00636462
Arpc5			0.0988146	0.00597967									0.0817873	2.39557e-05
Arpp19																																													-0.0726223	9.54155e-05
Art4																																	0.102393	0.00124301											0.080335	1.61849e-07
As3mt													0.0510311	0.00528359
Atf3					0.141295	0.00978225							0.0908549	3.99372e-09
Atp5a1																																													-0.0525269	0.00025133
Atp5e	-0.133449	8.0709e-05											-0.102658	9.46283e-12																															-0.053082	0.000673502
Atp5g1													-0.0657868	0.00255982
Atp5j2	-0.132534	0.000727528											-0.0635232	0.00285697
Atp5k	-0.137474	0.000987005			-0.138658	0.000439472							-0.12798	1.80799e-12																			-0.14152	7.02775e-05	-0.122741	0.00156984									-0.119688	8.80424e-13
Atp5l													-0.0684578	0.000292845																															-0.0608433	0.000671469
Atp5o-1													0.0803505	5.05503e-06																															0.0773868	6.71788e-05
Atp6v0e													0.0697509	4.71495e-05
Atp6v1h													0.0357882	0.00833776
Atpif1													-0.0637278	0.00283498
Atrx
Atxn2l													0.0188565	0.00286711
Banf1													-0.0740971	0.000972642
Banp	0.0887633	1.12915e-07											0.0505262	7.03634e-06																															-0.0324142	0.00444139
Bbc3													0.0220487	0.00804472																															0.0367936	0.000722853
Bcor													0.0283861	0.0054662
Bola2	-0.170417	4.21463e-06											-0.138659	1.60603e-14																							-0.119383	0.00344242							-0.0979348	3.73307e-08
Bpgm																																													0.0212412	0.00842657
Bri3																																													0.0628797	0.00209573
Brwd3													0.0239507	0.00514504
Bst2													-0.0750589	0.00194604																			0.106899	0.00305625											0.0770222	5.35001e-05
Btbd9																																													0.0332336	0.00377067
Btf3													0.0377385	0.00514896																															0.0435102	0.000174353
Btg2			-0.174504	0.000116138																																	0.258875	7.41307e-08							0.108369	1.31854e-05
Btk	0.0726586	0.00297933
C1rl																																													0.0516956	1.18453e-05
Cacybp	0.143589	0.000332939											0.0847593	1.57725e-06
Calm1																																													-0.0703787	0.000293201
Calm2													0.0725462	1.16345e-05
Calr																																	0.128601	0.000111555											0.107285	1.58054e-11
Canx																																													0.0593109	0.000889479
Car1
Car2
Casp2																																													0.0343835	0.00336648
Casp6													0.0439963	0.00106645
Cat																																													-0.0646176	3.4328e-05
Cbfa2t3																																	-0.149422	0.000265412											-0.0853896	5.25672e-05
Ccar1			0.114406	0.00526944									0.055684	0.00465636
Ccar2																									0.467499	0.000283783
Ccdc8																																													0.0258341	0.000834475
Ccndbp1	0.0778258	0.00299747			0.110746	0.00693055							0.0878443	3.48634e-09																															0.0554896	0.000253553
Ccnl1	0.119991	0.001372											0.114639	2.69653e-08
Ccnt1					0.125385	0.00318196							0.0842338	7.68842e-09																							-0.1418	0.000905135							-0.0684541	0.0036036
Cct3																			-0.216511	0.00172409
Cct5	0.133202	0.000597226											0.0644772	0.00118572																			0.10798	0.00282157											0.0829562	1.5733e-07
Cd24a																																					0.210769	1.52946e-09							0.12286	1.60899e-13
Cd47													0.0743561	0.000109133
Cdk18													0.012958	0.00868911
Cdk5rap1	0.0348224	0.00381378											0.0325201	5.10767e-06																			0.040046	0.00773946	0.0603601	0.00159175									0.0432711	9.97821e-09
Cdk5rap3																																													0.0503092	0.00114972
Cdkn1a													0.0501939	0.00729094
Cdkn1c			-0.133964	0.0011392									-0.0698388	0.00385302
Cdkn2d					0.13141	2.99347e-05							0.0602499	1.55654e-06
Cebpb					0.207537	0.000182249							0.103276	4.76094e-05
Cebpz																																													-0.0610563	0.00817382
Cenpa													0.0680415	0.000185242
Cgrrf1																																													0.0112103	0.00340328
Chchd2													0.0554911	0.000458087																															0.0587499	2.88879e-05
Chka													0.0314675	0.000234742
Chst2																																													0.0371753	5.2897e-06
Cirbp																																	0.160433	1.08796e-05	0.170375	2.86332e-08	0.116378	0.000157401							0.142314	3.28448e-18
Cited2																									-2.91536	4.32123e-06
Clec2d					-0.147932	0.000507968							-0.0973213	7.71611e-06
Clint1																																													0.0359283	0.0047263
Clk1													0.0327579	0.00507423
Cmas																																	0.127501	0.000592174											0.0661084	0.00217823
Cmtm7													0.0676245	0.000111201																	-0.138864	0.000602397	0.127647	0.0037226	0.162086	5.07992e-06	0.0993851	0.00719514							0.133569	7.78134e-15
Cnbp													0.0494124	0.00385284
Cnot6l																																													0.0658785	0.000405334
Cog2																									0.40861	0.00231763
Commd8																																													-0.0288788	0.00985161
Cope																																													0.0635085	0.000153141
Coro1a													0.0596951	0.00416231																															-0.0648048	0.000481358
Coro2a			0.0972197	0.00145741									0.0788463	2.17716e-07																															-0.0827727	2.90507e-07
Cox6b1													-0.055013	0.00905177
Cox6c	-0.11143	0.00700403			-0.14946	1.70429e-05							-0.102484	8.80799e-10																															-0.066064	0.000179863
Cox7a2													-0.063085	0.00496782																															-0.0779034	1.40833e-05
Cox7a2l													0.0517125	0.000364326																															0.0522299	0.000320207
Cox7b																																													0.0762044	0.000178621
Cox7c	-0.119212	0.000248408											-0.0810151	3.82795e-07																															-0.0853701	1.28252e-08
Cox8a													-0.0725701	3.754e-07																			-0.0775076	0.00773946											-0.0553844	7.30531e-05
Cpd													-0.00499433	0.00932373
Creb1																																													0.0301648	0.00555469
Creb5																																													0.0469862	3.88869e-05
Crebrf																																													0.0575182	0.00225206
Crlf2													0.0618579	0.000606101
Csnk1a1													0.0590923	0.00947303
Csnk1d													0.0560852	0.00138238
Csrnp1					0.12671	0.000604035							0.051486	0.000335697
Ctbp1													0.0566091	0.000558401
Ctla2a																																													-0.0900528	0.00962251
Ctnnb1													0.0648024	0.00350097
Ctxn1																																													0.013546	0.00668903
Cux1													0.0608435	0.00507423																					0.124307	0.00047874									0.0990881	2.21763e-09
Cwc15			0.0975814	0.00910493									0.0875431	6.46139e-08																															0.0603118	0.00353577
Cxcl10																									-3.16649	0.00022149
Cyp26b1			-0.0799117	0.00868525									-0.0335404	0.000844621
Cyp51			-0.0781396	0.00436842									-0.0649171	7.36887e-07
D8Ertd738e	0.056229	0.00528623			0.139528	0.0036598							0.0884514	1.11445e-07
Dach1																																			0.101089	0.0098589									0.0798101	2.17481e-07
Dad1																																	0.108136	0.00319449											0.0460303	0.00123091
Dbi			-0.111567	0.0046612									-0.108062	3.38657e-09
Dbnl													-0.0585644	0.0058655
Dcaf8																																													0.0658985	1.1894e-05
Dctn3													0.0450888	0.00298288
Dctpp1													-0.0632763	0.00688755
Ddit3													0.0544399	0.000992021
Ddost																																			0.126368	0.00047874									0.0882973	1.48924e-06
Ddx10													0.0430555	0.00935607
Ddx18													-0.0529968	0.00385284																			-0.124147	0.000118716											-0.0823797	1.44221e-06
Ddx27													-0.0566943	0.005927
Ddx39b													0.0674909	0.00218613																			0.131554	0.00151018											0.0710131	0.000395885
Ddx3y													0.0859765	3.754e-07
Ddx5	0.0847791	0.00596381			0.106859	0.000264719							0.0832257	3.99372e-09																															0.0593244	3.88869e-05
Dennd4a					0.207237	3.61005e-08							0.134507	6.47056e-14																															0.0695519	0.00140667
Derl1																																													0.00310891	0.00571542
Dhcr24													-0.0330852	0.00723454
Dhx8													-0.0335686	0.00196002
Diaph3																																													-0.044771	0.00238414
Dlg4																																													0.0334262	0.00133108
Dnaja1	0.123153	0.0058868	0.158302	4.50934e-06									0.128698	7.58708e-12																			-0.127566	0.00210285											-0.0911982	7.16012e-07
Dnajb1													0.0738481	7.62773e-06
Dnajb4																																													0.0457904	0.00106698
Dnajb9													0.056309	0.000484503																															0.0565129	0.00908303
Dnmt1													-0.0527976	0.0084172
Dock11																																													0.0259874	0.00561718
Dok3													0.0254713	0.00019946
Dpm1													0.0619324	0.000424128
Dpm3	-0.138196	0.00038363											-0.0968107	2.74102e-07
Dtnbp1																																													-0.0542059	0.00637838
Dusp1																																	0.157503	0.00438353			0.316533	3.35663e-14							0.215135	5.41651e-17
Dusp16													0.0222215	0.00226079
Dusp5													0.0556201	0.00189262
Dut													-0.0624673	0.00441375
Dvl2													0.00456962	0.00221588
Dynll1	0.201104	2.1384e-08	0.179413	1.65229e-08									0.157081	2.8843e-18																			-0.152101	2.65042e-05											-0.105995	9.24073e-08
Dyrk3					0.112131	0.00383905							0.0609006	1.39509e-05
Ebi3																																													-0.0522992	0.0068584
Ecscr													-0.0447844	0.00975727
Egr1	-0.154447	0.00226671	-0.263813	2.92425e-08									-0.10163	1.91538e-09
Eif1													0.0393497	0.00467196																			-0.0705991	0.00100878											-0.045729	0.000153141
Eif3c					-0.125593	0.00957082							-0.073912	0.000611403
Eif3e	0.102739	0.000898729											0.0705588	2.37172e-06																															0.0508826	0.00118692
Eif3f	0.0803734	0.00700403											0.0498834	0.00141917																															0.051183	0.000281336
Eif3i																																													0.0436019	0.00194994
Eif3j1													-0.053767	0.000851658																			-0.10406	0.000709562											-0.067873	9.06894e-06
Eif4g1																																													0.0273013	0.00444427
Eif4g2																																	-0.114311	0.00973765											-0.07201	0.000415756
Elf1													0.0844878	0.000309701																															0.087735	4.28323e-06
Elob	-0.128557	1.45152e-06											-0.0963741	1.3525e-08
Elovl1																																													-0.0495175	0.00461334
Erf																																													0.0345332	0.00466508
Erh													-0.079129	1.16345e-05
Esam													0.0628319	9.44156e-05
Etfb	0.122321	0.00450823	0.103142	0.000337701									0.103147	1.45015e-09																			0.117502	0.00973765											0.0927032	1.70337e-07
Exosc10													-0.0527951	0.000350365																															-0.0419187	0.00607067
F2r													0.0428928	0.00151215
F830016B08Rik																																													0.0398146	0.00439457
Fam103a1													0.0552503	0.000609684
Fam107b																																	0.101626	0.00953576	0.12034	0.0039208									0.109135	7.95913e-11
Fam69a																																													0.0416589	0.00131285
Fam96a	0.11909	0.00243917	0.111102	0.00436956	0.12759	0.00401231							0.114593	1.6824e-11																			0.17345	2.39882e-08			0.151096	1.57632e-06							0.126373	1.58048e-15
Farsa			-0.0144102	0.00487311
Fbxo45																																													-0.00556246	0.00702983
Fbxw4			0.0245285	0.00681273									-0.00590848	0.000831096
Fcer1g																																													-0.0680463	0.000169644
Fcgrt																																													-0.0495679	0.00182478
Fdps													-0.0678282	6.55038e-06
Fgfr1													0.0302284	0.000476268
Fis1																																													0.058028	0.00479096
Fkbp2																																													0.0677236	0.000153141
Fkbp3																																													-0.0733108	5.06713e-05
Fkbp5																																													-0.0344778	0.00235169
Fmc1													-0.0667872	0.000764259
Fopnl													0.0592685	0.001739
Fos													0.0335012	1.03251e-06																	-0.37876	3.659e-06	0.229839	0.000901431			0.460915	6.02917e-28							0.338249	2.77908e-29
Fosb	0.248509	1.29612e-05			0.355817	4.98152e-11							0.267656	2.88271e-22																			0.542526	1.50209e-33	0.514905	1.26038e-33	0.543607	8.56427e-36							0.554706	6.82535e-113
Frat2													0.0572897	0.00398392																															0.0442674	0.00718016
Ftl1													0.0488332	2.17975e-05																															0.0475197	3.98448e-05
Fubp1																																													-0.0837214	5.42092e-05
Fuca2													-0.0112926	0.0088038
Fut8													0.0706581	0.00653541
Gabbr1													-0.0271802	2.37172e-06
Gadd45g													0.0384323	0.00367898
Gapdh													0.0595365	7.96878e-05																							0.0832872	0.00692694							0.0612372	1.31854e-05
Gata2													0.0791757	0.000638128
Gbp6																																													0.0220912	0.00507281
Gcat													-0.0378341	0.00385284
Gch1																																													-0.0415368	0.00143674
Gda																																													-0.0484753	0.00798447
Gdf3																																													0.0558662	1.46355e-06
Gem																																	-0.079999	0.00117999	-0.093928	0.000100542									-0.0815429	4.04998e-09
Gfi1																																					-0.0451978	0.00188847							-0.0275085	4.28323e-06
Gimap5					-0.148737	0.000150972							-0.0970182	4.27185e-07
Gins4																																													-0.0393052	0.00564413
Glrx5																																													0.0470319	0.00248594
Glul																																			0.0929187	0.00594484									0.0736164	0.00133108
Gm10036													0.0382216	0.00429872																															0.0327194	9.24215e-05
Gm10073					-0.120863	0.0091786							-0.0952706	1.53518e-06																															-0.0680182	0.0012364
Gm10076	-0.287013	4.37552e-31	-0.242616	1.89826e-20	-0.239041	1.53497e-17							-0.261223	1.38782e-75																			-0.275345	9.02347e-33	-0.237202	8.81548e-24	-0.287674	7.16994e-30							-0.270824	3.72353e-94
Gm1673																																													-0.0511942	9.56964e-05
Gm16740													0.0137609	0.00363376
Gm19590																																													0.0693006	0.00271133
Gm2000													-0.0621612	0.00123613																			-0.112618	0.00147087											-0.0912521	1.86209e-08
Gm26532					0.210925	1.46163e-06							0.110458	3.88697e-10
Gm2a																																													-0.00391326	0.000978563
Gm45051																																													0.0277481	0.00423019
Gm47283													0.0809365	8.67519e-05
Gm8186	-0.082798	7.05815e-05											-0.0612166	2.15517e-08																							-0.0686167	0.00055172							-0.0493839	4.33734e-06
Gm9493													0.0673895	0.000256957																															0.0625339	5.94185e-06
Gmfg													0.0658272	0.00935607
Gnb1																																					0.0232267	0.00973249
Gnb5													0.00645237	0.00134497
Gosr2													0.0410131	0.000587221
Gpr171													0.053044	0.000524779																															0.057682	0.000875432
Gpx1													0.0638036	0.0016087																			0.0953828	0.00353272			0.113818	0.000423321							0.0952001	4.6488e-10
Grhpr													0.0438594	0.00469698
Grik5																																													0.0287066	0.00814036
Gstk1																																													0.0351623	0.000308419
H2-Aa																																													0.090013	2.2121e-05
H2-Ab1																																													0.0700068	0.000722976
H2-D1													0.0504778	0.000281456
H2-Eb1																																			0.132698	0.000496335									0.0829647	2.95309e-07
H2-K1	0.0706698	0.00173104											0.0432898	0.00048796																					0.070806	0.00232309									0.0493176	1.15383e-06
H2afy																																													0.052769	0.00721289
H3f3a																																			0.0757018	0.00276011	0.0669545	0.00926357							0.061032	1.16873e-09
H3f3b			-0.0985275	0.00476617	0.106585	0.00969168																											-0.105968	0.00142646			-0.230325	1.27049e-21							-0.114112	1.8336e-12
Hcst																																													-0.033568	0.000511801
Hdac9																																													-0.000632034	0.00960582
Hdgf													-0.0691852	0.00532769
Heg1																																													0.037911	0.0011441
Herpud1													0.0796636	2.94789e-05
Hes1	0.123044	0.00175013			0.294672	6.74315e-07							0.194005	1.18755e-13																															0.115433	0.00020461
Hhex																																	-0.144599	7.64912e-05											-0.101348	3.66781e-08
Hid1													0.0338305	0.00496653
Hist1h1c			-0.145247	0.00433487									-0.113111	5.08847e-06																					-0.107789	0.000198536	-0.221536	6.61736e-07							-0.141764	4.9015e-14
Hist1h2bc																																													-0.0353868	0.00167119
Hlf
Hmgb1																																													0.0507188	0.00182593
Hmgcs1																																	-0.062958	0.00465181
Hnrnpa0					0.11134	0.00736938							0.088601	6.2237e-07																															0.0522811	0.0024995
Hnrnpd	-0.155929	0.000270417											-0.105704	2.4862e-07																															0.0579713	0.00610627
Hnrnpu																															-0.143633	0.000439419
Hnrnpul2																																					0.106402	0.000113856							0.0456084	0.00389749
Hsd17b10													0.076016	0.000214484
Hsdl2					0.0559505	0.00523023
Hsp90b1																																	0.166135	1.21429e-07	0.114458	0.00167822	0.100218	0.00618676							0.128172	1.16446e-16
Hspa1a
Hspa1b
Hspa5	0.136846	9.79203e-05			0.28935	7.95433e-12							0.15563	4.98694e-14																															0.0786576	0.00322028
Hspa8	0.087871	0.000940322	0.0975685	0.000221623	0.086207	0.00693055							0.0828983	1.35207e-10
Hspe1													-0.0631096	0.00471698
Hsph1	0.0928092	0.000344407											0.0501629	0.000148335
Id1					0.171382	0.00172109							0.0800706	5.09107e-05
Idi1					-0.110343	0.00702229							-0.0879992	7.33147e-07
Ier2			-0.189555	0.00162377
Ier3			-0.142449	0.00147679
Ier5					0.148247	0.0003946							0.0793743	7.18484e-05
Ifi27																																	0.127352	3.19332e-07			0.1588	5.60596e-06							0.135639	5.94367e-18
Ifi44																																													0.0634533	0.000179863
Ifit1																									-1.74083	0.00048477
Ifitm1	-0.120235	0.00351505	-0.106123	0.0012995									-0.0887507	4.91705e-07
Ifitm3																																	0.0844813	0.00453619			0.0939584	0.00571365							0.0794407	1.31361e-08
Igtp																																													0.0561949	0.00736315
Iigp1																																													0.103764	4.80988e-06
Il15			0.0846219	0.00417305									0.0583909	3.70649e-05
Immp1l													0.0490267	0.00434602
Ing2					0.15623	4.20685e-05							0.0787441	4.48393e-07
Invs													-0.0171637	0.00459537
Irf2																																			0.0991594	0.00636978									0.0645215	0.00138707
Irf3													0.000491339	0.00168636
Irf7																																					0.0774617	0.00724414							0.0550142	0.000180637
Irf9																																					0.107923	0.000369793							0.0663985	5.46558e-05
Irgm1																																													0.0385568	0.00279415
Isg15																																	0.090474	1.65997e-06			0.076134	0.00193937							0.0863765	2.0453e-11
Itm2b	0.0841283	0.000410689			0.0872466	0.000447712							0.0757669	7.00465e-12
Ivns1abp													0.0507459	0.00808569
Jagn1																																													-0.0470773	0.00675706
Jak1																																													0.0764481	9.10019e-05
Jak2			0.0711808	0.000189804									0.0298567	0.000103287
Jam2													0.0263103	0.00900212
Jmjd1c													0.0482204	0.00427609																															0.0713151	2.16836e-05
Jun	0.353477	9.58779e-11			0.283216	2.53039e-07							0.282022	1.48524e-23																			0.285874	9.74229e-08	0.36531	2.69093e-14	0.220441	1.32953e-05							0.307061	2.84744e-34
Junb			-0.315526	2.63241e-10
Jund	0.196229	1.29612e-05			0.305152	5.80283e-16							0.207485	7.07312e-23																			0.128687	0.00988031			0.199248	8.41171e-09							0.170773	2.17066e-17
Kansl1l													0.0458098	0.00690874																															0.0475723	0.00260942
Kcnq1ot1													-0.085148	0.00195
Kctd1																																	0.0460139	0.00225713
Kdm2a
Kit													-0.0685507	0.00725214																															0.07806	8.86109e-05
Klf13	0.109205	1.83049e-06			0.200658	8.54555e-09							0.126766	1.57048e-19
Klf2					0.361411	2.53039e-07							0.229187	7.2336e-11																			0.322357	2.5094e-08	0.200687	0.00401662	0.326234	4.17076e-06							0.338917	2.42656e-23
Klf4	0.0842557	0.000987005			0.210408	0.000116801							0.145235	5.88444e-13																							0.195113	6.81329e-06							0.155352	5.66449e-16
Klf6	0.168745	0.00418165	0.0292581	0.00959188	0.228661	1.16068e-06							0.176599	1.61608e-16																			0.184959	0.00124301			0.274831	6.38592e-09							0.218173	4.98108e-17
Klf9					0.144549	0.00358353							0.113727	3.50115e-08																					-0.121224	0.00484978									-0.0818787	0.000397103
Klhl12													0.0322477	0.00638981
Klhl24																																	0.115811	0.00625528											0.0909876	7.41533e-06
Kmt2a	0.120287	0.0039316
Kmt2e													0.0553352	0.000162682
Kpna1													0.0396274	0.000737109
Krt18													0.0142116	0.00168509
Krtcap2													-0.0649503	0.00285697
Lamtor1													0.0582828	0.00351083
Lancl1													0.0470335	0.000103287
Lcp1																																													0.0424151	0.000903125
Leng8													0.0429305	0.00317177
Lima1																					-0.0168045	0.00240128
Lims1																																													0.0483638	0.00692443
Llph																																													-0.0552084	0.00731845
Lmo2																																			0.128128	1.8613e-06									0.0737034	7.14126e-07
Lrch3			0.0335945	0.00680484
Lrfn1													-0.0114838	0.0048092
Lrrc1																																					0.0275774	0.00918251
Lrrc14													-0.029993	0.00541217
Lsm7													-0.0786668	5.92066e-05
Lst1													-0.0719764	0.00747662																							-0.118966	0.00265866							-0.0987759	2.57573e-07
Ltb																																	-0.182628	0.000111555	-0.14222	0.00636978									-0.148927	2.54113e-10
Ltbr													0.00174009	0.00991436
Lxn													0.0464078	0.00566982
Lztfl1													0.0388517	0.00324652
Madd																																			0.068283	0.00159175									0.0350183	0.000922199
Maff													0.0579967	0.000211908
Mafk													0.0365106	0.00624965
Malat1			-0.087627	0.000721604	-0.112942	9.89857e-06							-0.0797003	2.6694e-10																							-0.102207	3.07147e-05							-0.0700351	2.05462e-08
Manf																																													0.090431	1.74109e-05
Map2k1													0.0454216	0.000281456
Map4k4													0.0474358	0.00416968
Mapk1													0.024721	0.00416231
Mapk6													0.0598244	1.46702e-06
Mapk8													0.0328563	0.00347106
Mapre1					0.118275	0.00304154
March7													0.0660426	0.000511589
Marcksl1																																													0.0605388	0.00330636
Matr3																																													0.0571862	0.0023043
Mblac2													-0.0168774	0.00572416
Mbnl2													0.0339901	0.00698259
Mcl1					0.12551	0.00637818							0.0596226	0.000159496
Mcm5													-0.0359437	0.00592055
Mecom																																													0.0695431	0.00132105
Med23																																													0.0222228	0.00387789
Mepce																																													0.016026	0.000489582
Metap2													-0.0564096	0.00788898
Mettl7a1																																													-0.0575671	0.00663033
Mfge8																																					-0.0993917	0.00188847
Mfng													0.0487403	0.000293781
Mfsd13a																																													-0.00748679	0.00059642
Mgme1																																													-0.0465423	8.01801e-05
Mgst1													0.0457771	0.00189262
Mndal																																													0.0675416	0.00236777
Morf4l2																																													0.0409529	0.00186675
Mpped2													0.0302077	0.00868911
Mrpl14																																													-0.0650061	0.000503861
Mrpl24													0.0499922	0.000361452
Mrpl33													-0.0674576	0.00385284																															-0.077305	3.1471e-05
Mrpl44																									0.442852	0.00186925
Mrpl52			-0.131445	0.000548666									-0.125832	1.97743e-12
Mrps18c													-0.0264329	0.00866881
Msra													0.0286384	0.00416968
Mtss1																																													0.0318679	0.00309864
Myb	0.137847	6.08847e-05											0.085048	2.35231e-06																															-0.0799662	0.000642273
Mybbp1a													-0.0576064	0.00973782																															-0.0491708	0.00487612
Mycn													-0.0765356	0.00294609																															-0.079036	0.000720625
Myl10	0.127883	1.66651e-08	0.113679	1.46314e-05	0.153275	1.10242e-09							0.128653	2.35057e-28																					0.195277	0.00243668									0.163315	3.17479e-10
Myl12b			0.110999	0.00124802									0.0941748	1.00378e-09																							0.113806	0.00072881							0.0886474	9.04221e-10
Mynn																																													0.0400916	0.0073285
Nabp1	-0.0639902	0.00767333			-0.0843607	0.00702229							-0.0536234	1.44474e-05
Naca																																													0.0299236	0.00587141
Napsa													0.0260533	0.00541217
Ncl					-0.116126	0.00462984							-0.0787027	1.16345e-05					-0.325369	0.00600404											-0.159402	0.000387685
Ncoa4																																													0.0665223	0.000259885
Ndel1													0.0734811	2.07813e-06
Ndfip2													0.0444943	9.78059e-05
Ndufa13													-0.0614049	0.00286711
Ndufa2																																													-0.0679815	0.000630416
Ndufa3	-0.123387	0.0025338											-0.105718	4.28214e-09																															-0.0955172	1.67366e-08
Ndufa4	-0.118283	0.000198765
Ndufa5													-0.061502	0.00469613																			-0.135039	7.02775e-05											-0.0801543	4.39276e-06
Ndufb11													0.0688278	9.40845e-05
Ndufc1													-0.0640197	0.00118631																															-0.0798161	9.91573e-06
Ndufs8																																													0.0660532	0.00039151
Neurl3					0.176399	0.00142768							0.0774558	0.00428659
Nfat5													0.0613422	0.000345147
Nfatc2													0.0427198	3.94648e-06
Nfe2l2													0.0678538	0.000214484
Nktr													0.0891803	7.67516e-06
Nkx2-3													0.0857203	0.000124828
Nme7													-0.00221598	0.00913893
Nop10	-0.113468	0.00148843											-0.113953	2.83577e-11
Nop56													-0.0660265	0.00911345
Npc1													0.0344139	0.00436778
Npepps													0.0392121	0.00469613
Nr2c2																																													0.0548188	0.000405334
Nr4a1	-0.0149472	9.04141e-05	-0.11466	0.00386328	0.144486	0.00101175							0.0780884	4.69792e-16																	0.00355987	0.00586189			-0.0982264	0.00442762
Nr4a2			-0.143715	8.95743e-05																													0.0957163	0.00210285											0.101314	3.73973e-08
Nrd1																																													0.0484515	0.00127773
Nrg4																																													0.0273407	0.00151723
Nrgn			0.142545	0.000283348									0.100091	6.83765e-07																					0.115509	0.00232309									0.0909456	8.20921e-07
Nsd1													0.0100536	0.00587145
Nsdhl													-0.045315	5.92066e-05
Nt5c3			0.109856	0.00366343									0.0804143	1.5308e-05																															0.0498308	0.000477596
Nt5dc1																																													0.0333901	0.00970275
Nucks1													-0.0674464	0.00507145
Nudt14													0.029653	0.00044563
Nxf1																																													0.0538332	0.000276424
Oaf																																													-0.0189976	0.00223187
Oard1			0.0939847	0.00161254
Oas1a													-0.00351897	0.00567304
Oasl2																																													0.0726666	1.18453e-05
Ogt			0.115325	0.00248599									0.0629168	0.00179651
Osbp																																					0.0719037	0.00201099							0.0415346	0.000903125
Otos																																	-0.0590606	0.000709562											-0.0525723	4.68287e-09
P2ry14																																													0.0389937	0.00571542
P4hb													-0.0466468	0.00317177
Pabpc1													-0.0408478	0.00958541
Paip2													0.0533784	0.00879386
Parl																																													0.0493621	0.00998656
Parp1																																	0.106716	0.00938281											0.0644316	0.000889479
Pbx1													0.0923214	0.000110418																			0.12013	0.000163878			0.102026	0.00724414							0.109638	1.10669e-11
Pdcd10	0.0185889	0.00932567											0.0180651	0.00273701
Pde4b					0.122966	0.000120125							0.0752923	2.4429e-07
Pdia3																																	0.170613	1.13086e-06											0.0893544	2.67107e-08
Pdia6																																	0.100067	0.000614297											0.0818605	4.35376e-07
Pdlim2													0.0201967	0.000261539
Pdzk1ip1																																			0.111194	0.00689487	0.113953	0.00926357							0.10372	8.30073e-08
Per1													0.0622502	1.83308e-06																			-0.0739347	0.00262026	-0.0755843	0.00975777	-0.10163	0.006219							-0.0730961	1.49399e-07
Pet100													-0.0732259	6.68496e-06
Pex16													0.00865961	0.00398524
Pf4																																	-0.101988	0.00728986											-0.0526461	0.00819881
Pglyrp1													0.0472212	5.27744e-06																															0.0293303	0.000244042
Phf21a																																													0.0278155	0.0039543
Phf23																																													-0.0238963	0.00718016
Phpt1													0.0454858	0.000204073																			0.0663502	0.00999454											0.059603	9.13518e-08
Pigh													-0.0235287	0.00937241
Pik3ip1																																													-0.0987447	1.48924e-06
Pim1																									-1.26384	7.28018e-06																			0.0745066	0.00515603
Pim3													0.0391072	0.00158865																							-0.119211	0.00188847							-0.049809	0.00124804
Pitpnc1																																													0.0514366	0.00027524
Plac8
Plek																																					0.0547344	0.000380724							0.0312385	3.38918e-06
Pnp																																	-0.187459	1.98688e-08											-0.121814	1.61617e-11
Pnrc1																																													0.062101	0.000813934
Pnrc2			0.0391865	0.00708571
Pop7			0.00467081	0.006985
Ppa1																																			0.11075	0.00167822									0.0708947	0.000459115
Ppia																																													0.0350532	0.0062848
Ppm1a																																													0.0422254	0.00676693
Ppp1r10																																					0.112035	0.000723819							0.0833483	7.33556e-07
Ppp1r15a													0.0948637	4.91151e-06																															0.122518	8.76945e-07
Ppp1r15b																																													0.0307475	0.00406802
Ppp1r16b																																													0.0313075	0.00186675
Ppp1r35																																													-0.0362868	0.000497331
Ppp2ca					0.151805	1.43217e-05							0.0941349	5.61313e-09
Ppp4c													0.0503197	0.000758291
Prdx1																																	0.0987185	0.00105761											0.0675826	9.68314e-06
Prkag1													0.039668	0.00688804
Prkar1a													0.0751313	0.000110418
Psma1					0.143971	2.99347e-05							0.0850008	2.15785e-06
Psmb8																																													0.0642326	5.02792e-05
Psmd5																																													-0.0442342	0.000903125
Psmd7													0.0430574	0.00114542
Psmg1													0.0462447	0.00300875
Ptbp2													0.0159474	0.00364733
Ptp4a1													0.0609055	1.16345e-05
Ptp4a3																																													0.0741065	0.000182269
Ptpn18													-0.0513516	0.00688804
Ptpn2													0.0565844	0.00154342
Ptpre																																					0.0420144	0.00117976							0.0565013	0.00040387
Ptrhd1																																	0.0611711	0.0072218
Puf60	0.232174	8.00709e-13	0.182963	1.60872e-08	0.215991	4.16609e-10							0.213579	1.80442e-36																			0.213483	5.96785e-11			0.130451	0.000812577							0.15252	2.11009e-19
Qdpr													0.0669253	0.00134728																			0.131177	7.63707e-05											0.090245	8.95824e-08
R3hdm4													0.0652415	0.000943087
Rab1a													0.0476607	0.00789601
Rab24													0.04424	0.00106412
Rab2b																																			0.0328742	0.00442762
Rab5a													0.0489905	6.27292e-05
Rac2																																													-0.0622827	0.00178056
Racgap1																																													-0.0221597	0.00736315
Ramp1													0.0870274	7.58775e-05
Ramp2																																													0.0391336	0.00808111
Ran																															-0.125201	0.00346484
Ranbp2					0.122923	0.00430735							0.0659053	4.30496e-05
Rap1b					0.117601	0.00927652							0.0881823	5.2689e-06
Rbm25													0.0775886	0.000392416
Rbm28													-0.0496505	0.00306801
Rbm3													0.0635076	0.000529488																					0.100149	0.00707044									0.0892361	6.69401e-10
Rbm39					0.0930497	0.00784589							0.0949017	1.16826e-11																															-0.0485598	0.0029831
Rbpms					0.152231	0.00087699							0.100637	1.55282e-07																															0.0675317	4.17786e-05
Rc3h2													0.0178207	0.0088038
Rdx													-0.063691	0.00379392
Reep3																																													0.0505749	0.000210828
Retreg1																																					0.0931848	0.00377267							0.0765804	1.48924e-06
Rexo4																																													-0.0378357	0.00109595
Rftn1																																					0.100472	0.00504428							0.0573471	0.000531553
Rgcc					0.186702	2.75464e-08							0.0734706	1.68001e-09
Rgs1													0.143155	5.40887e-05
Rgs19													0.0345749	0.00728124
Rgs2	0.111115	0.000224091											0.105843	4.03882e-06
Rhoa																															-0.101462	0.00261666
Rhob	0.148034	2.65568e-06			0.168973	0.00304154							0.156055	1.43567e-12																															0.127264	6.92576e-09
Rictor																																													0.0249478	0.00940447
Rilpl2																																													0.0315431	0.000106382
Ripor1													-0.0211442	0.00958541
Rmnd1													-0.0166927	0.00216297
Rnaset2a													0.0435924	2.2505e-07																															0.0537372	2.46997e-08
Rnf114													0.0393745	0.00480916
Rnf214																									0.184311	0.00809637
Rnh1													0.0511071	0.00434858
Romo1	-0.121219	0.00785699											-0.0730122	0.00048796
Rpap1													-0.0226938	0.00831408
Rpl10a													0.0275898	0.00273793
Rpl13	0.0481661	1.49107e-06	0.0373825	0.00419395	0.0412336	0.00710307							0.0396459	1.234e-12																			0.058608	5.6642e-13	0.0388463	0.00159175	0.0483899	6.99793e-05							0.0461322	2.20189e-19
Rpl17																																													-0.024827	0.000171869
Rpl18a																																	0.0403536	0.00014722											0.0320558	3.15108e-08
Rpl21																																													0.0245114	0.000700817
Rpl22													-0.0415518	1.33165e-05																															-0.03803	6.05235e-05
Rpl23	-0.0404057	5.94884e-05	-0.0356112	0.0066983	-0.0587186	8.13721e-09							-0.0454784	1.46053e-19																					-0.0460112	3.75822e-06	-0.0415359	8.92858e-05							-0.0373879	6.34231e-15
Rpl23a	-0.0670477	0.000958469			-0.076427	0.00161448							-0.0709127	6.97532e-13																															-0.0416958	0.000250223
Rpl26													-0.0374405	4.51474e-09																			-0.0344839	0.00533272			-0.0436217	0.00556444							-0.0397775	1.79372e-11
Rpl27													0.0546086	0.00062527																			0.100858	0.000709562			0.107707	0.000214374							0.085827	3.36865e-10
Rpl27a	-0.0402045	0.000987005	-0.0431537	0.000655571	-0.045417	0.00231069							-0.0461724	3.07847e-16																			-0.038541	0.000287621											-0.0351266	4.60564e-10
Rpl28	-0.0454036	0.00348169	-0.0469381	0.00679977	-0.0521118	0.00258544							-0.0501206	2.3713e-13																															-0.03269	9.75783e-06
Rpl29	0.0664538	0.000551592											0.0608057	2.28802e-10																							0.0776777	0.000108011							0.0564948	2.15635e-09
Rpl30	-0.0796042	1.76049e-14	-0.063477	1.05109e-08	-0.0873278	1.12932e-13							-0.0779889	1.47114e-42																			-0.0767664	1.03703e-17	-0.058849	2.70089e-06	-0.0614948	1.22753e-06							-0.0683264	4.78157e-34
Rpl31	-0.1012	0.000182651											-0.0656479	5.08847e-06																							-0.0950134	0.000573917							-0.0798075	1.54054e-11
Rpl32					-0.0417038	0.00230893							-0.0231136	0.000765198
Rpl34	-0.0732923	1.06198e-09	-0.092493	2.8874e-13	-0.103624	6.86237e-14							-0.0906196	7.27867e-43																			-0.0810915	1.92321e-15	-0.106432	3.02043e-19	-0.0910596	2.31574e-14							-0.092237	5.72893e-53
Rpl35	-0.155218	3.29082e-21	-0.13376	1.82013e-12	-0.155499	4.9798e-15							-0.152183	8.58969e-56																			-0.122668	3.06593e-15	-0.158757	1.30683e-17	-0.14218	5.1922e-15							-0.14236	1.73439e-53
Rpl35a	-0.0663119	1.33588e-08	-0.0781754	8.25765e-11	-0.0678011	2.63679e-06							-0.0737469	3.17805e-32																			-0.071111	3.79259e-12	-0.0933905	4.53448e-16	-0.085378	5.33846e-13							-0.0861613	4.00927e-49
[truncated: 247 more rows]
[truncated: 15 more columns]

## Sheet: pIC
primerid	logFC_HSC_Metabolism_male	adj_p-value_HSC_Metabolism_male	logFC_HSC_Quiescent_male	adj_p-value_HSC_Quiescent_male	logFC_HSC_Activated_male	adj_p-value_HSC_Activated_male	logFC_HSC_Interferon_male	adj_p-value_HSC_Interferon_male	logFC_HSC_Acute-Activation_male	adj_p-value_HSC_Acute-Activation_male	logFC_HSC_Cell-cycle_male	adj_p-value_HSC_Cell-cycle_male	logFC_HSC_pooled_male	adj_p-value_HSC_pooled_male	logFC_LSK_Primed_male	adj_p-value_LSK_Primed_male	logFC_LSK_Metabolism_male	adj_p-value_LSK_Metabolism_male	logFC_LSK_Primitive_male	adj_p-value_LSK_Primitive_male	logFC_LSK_Cell-cycle_male	adj_p-value_LSK_Cell-cycle_male	logFC_LSK_Acute-Activation_male	adj_p-value_LSK_Acute-Activation_male	logFC_LSK_Interferon_male	adj_p-value_LSK_Interferon_male	logFC_LSK_Interferon cell-cycle_male	adj_p-value_LSK_Interferon cell-cycle_male	logFC_LSK_Myeloid_male	adj_p-value_LSK_Myeloid_male	logFC_LSK_pooled_male	adj_p-value_LSK_pooled_male	logFC_HSC_Metabolism_female	adj_p-value_HSC_Metabolism_female	logFC_HSC_Quiescent_female	adj_p-value_HSC_Quiescent_female	logFC_HSC_Activated_female	adj_p-value_HSC_Activated_female	logFC_HSC_Interferon_female	adj_p-value_HSC_Interferon_female	logFC_HSC_Acute-Activation_female	adj_p-value_HSC_Acute-Activation_female	logFC_HSC_Cell-cycle_female	adj_p-value_HSC_Cell-cycle_female	logFC_HSC_pooled_female	adj_p-value_HSC_pooled_female	logFC_LSK_Primed_female	adj_p-value_LSK_Primed_female	logFC_LSK_Metabolism_female
[truncated: 5,689 more rows]
[truncated: 15 more columns]
