# Supplementary material for: External signals regulate continuous transcriptional states in hematopoietic stem cells
Source: eLife. 2021 Dec 23;10:e66512. doi: 10.7554/eLife.66512 (PMC8700284; doi:10.7554/eLife.66512)
Supplement: Supplementary file 4. — Marker gene enrichment was calculated using a Wilcoxon rank-sum test. Score (suffix ‘_s’) indicates the z-score of each gene on which p-value computation is based. Other fields are log fold change = suffix ‘_l’ and false discovery adjusted p-value – suffix ‘_p’. [file elife-66512-supp4.xlsx]

## Sheet: HSC_replicate1
Quiescent_n	Quiescent_s	Quiescent_p	Quiescent_l	Activated_n	Activated_s	Activated_p	Activated_l	Metabolism_n	Metabolism_s	Metabolism_p	Metabolism_l	Interferon_n	Interferon_s	Interferon_p	Interferon_l
Txnip	12.4586	1.29167e-32	0.807987	Fos	33.8553	4.36902e-247	3.58867	Ran	16.2208	1.72477e-55	1.005	Ifi44	6.30885	4.04712e-06	4.42471
Ifitm1	12.0695	1.29583e-30	0.531947	Nr4a1	31.233	2.7348e-210	4.17579	Ptma	15.4118	4.90775e-50	0.474225	Ifit1	6.00079	1.41347e-05	5.20323
Rsrp1	11.6861	1.08024e-28	0.494833	Dusp1	28.0024	7.29645e-169	2.77831	Ranbp1	14.2791	7.08943e-43	1.13096	Oasl2	5.5854	0.000111895	3.45024
Ltb	10.9071	6.39641e-25	0.826469	H3f3b	26.3101	5.29134e-149	0.911772	Actb	13.7057	1.58335e-39	0.736234	Isg15	5.4453	0.000186143	4.86632
B2m	10.4774	5.64127e-23	0.218712	Ier2	24.7855	3.69974e-132	1.99218	H2afz	13.7018	1.58335e-39	0.727672	Stat1	5.2988	0.000335632	3.05689
Mettl7a1	10.3362	2.39961e-22	0.841937	Zfp36	24.4313	1.67679e-128	2.64729	Ppia	13.5341	1.41632e-38	0.372023	Rtp4	5.10203	0.000806303	3.36616
Gimap1	10.2518	5.57442e-22	0.602891	Junb	24.4303	1.67679e-128	2.41446	Mif	13.1901	1.30979e-36	0.931342	Gm4951	5.04272	0.000943976	3.55657
Gimap6	9.88001	2.15229e-20	0.677356	Klf6	23.549	2.31105e-119	2.56463	Eif5a	13.0412	8.55692e-36	0.628084	Irf7	4.8708	0.00200028	4.22095
Ly6a	9.5343	5.87154e-19	0.85044	Fosb	21.8236	2.2145e-102	1.9188	Cdca7	12.3258	5.57135e-32	1.59801	Ifitm3	4.61301	0.00576586	1.14587
Mllt3	9.12646	2.54734e-17	0.642038	Jun	20.9147	5.6677e-94	1.3647	Ncl	12.2001	2.48398e-31	0.598345	Igtp	4.61113	0.00576586	3.36175
Pdzk1ip1	8.54234	3.94517e-15	0.505902	Rgs2	19.168	8.96468e-79	2.44375	Erh	11.6198	2.13992e-28	0.706979	Bst2	4.54824	0.0070804	2.20682
Ifitm3	8.36599	1.5893e-14	0.290262	Ppp1r15a	19.0613	6.35756e-78	1.80804	Nme1	11.5553	4.26457e-28	0.987034	Ifi35	4.34769	0.0165057	2.75684
Itm2b	8.30793	2.54923e-14	0.23301	Neat1	18.3312	5.16753e-72	1.55822	Nop56	11.5532	4.26457e-28	1.13404	Iigp1	4.16485	0.0337464	3.3817
Procr	8.255	3.90531e-14	0.723657	Cdk11b	18.0919	3.7933e-70	1.6405	Rbm3	11.1385	4.3428e-26	0.779524	Ifi203	4.15299	0.0337464	1.70671
Hacd4	8.22408	4.96795e-14	0.625758	Snrpc	17.9363	5.89803e-69	1.43371	Hsp90aa1	10.9846	2.33121e-25	0.516629	Rsad2	3.94492	0.0766185	3.61119
Gstm1	8.20319	5.79067e-14	0.649037	Egr1	17.8407	3.06986e-68	2.05863	Dctpp1	10.9208	4.40011e-25	1.2917	Ifit3	3.92213	0.0789754	6.00374
H2-D1	8.18959	6.28974e-14	0.236271	Ubc	17.6055	1.8945e-66	0.979214	Srsf7	10.9028	5.19003e-25	1.0113	Slfn8	3.87148	0.091613	3.36202
Cox7a2l	8.15855	8.00263e-14	0.302	Srsf5	16.811	1.6215e-60	0.829673	Pfn1	10.8804	6.42899e-25	0.491297	Herc6	3.77846	0.12606	2.75787
H2-K1	8.01792	2.45786e-13	0.251825	Sik1	16.442	7.25761e-58	2.59499	Stmn1	10.3933	1.0633e-22	0.704977	Mndal	3.76528	0.12606	1.70554
Tmem176b	7.99526	2.90861e-13	0.356076	Nr4a2	16.1994	3.66265e-56	3.73343	Slc25a5	10.3607	1.45544e-22	0.686703	Rnf213	3.67037	0.174345	3.04058
mt-Co1	7.78882	1.4981e-12	0.156513	Coq10b	15.071	1.72305e-48	1.90002	Set	10.1907	7.95543e-22	0.845764	Ly6e	3.61369	0.20695	1.29183
Shisa5	7.68603	3.31075e-12	0.492725	Btg2	14.8139	7.79042e-47	2.53051	Txn1	10.1746	9.04241e-22	0.547449	Eif2ak2	3.57924	0.22551	2.37417
Hlf	7.45077	1.96474e-11	0.504467	Ddx5	13.6493	1.2763e-39	0.515467	Rps27l	10.0554	2.91323e-21	0.564	Tor1aip1	3.39131	0.435411	2.11296
Crlf3	7.31487	4.94541e-11	0.50299	Eif1	13.4689	1.4303e-38	0.352194	Serbp1	9.987	5.43845e-21	0.44566	Irgm1	3.29584	0.588641	2.8862
Meg3	6.97436	5.46146e-10	1.0528	Clk1	13.4268	2.42441e-38	1.23565	Dut	9.95575	6.99369e-21	1.48664	Sp140	3.28398	0.589429	1.90946
mt-Cytb	6.95671	6.11523e-10	0.164321	Ccnl1	12.4685	6.14284e-33	1.11646	Cox5a	9.59577	2.35121e-19	0.754259	Trim12c	3.23276	0.6659	2.14683
Rps4x	6.90199	8.89467e-10	0.081664	Rlim	12.3332	3.20127e-32	1.68051	Nap1l1	9.58382	2.58929e-19	0.77269	Chchd7	3.22749	0.6659	1.50746
Ogt	6.84572	1.30417e-09	0.362421	Rgs1	12.1966	1.6667e-31	1.68849	Nop10	9.54566	3.64249e-19	0.506431	Parp9	3.19039	0.72114	2.71264
mt-Atp6	6.83782	1.36187e-09	0.0997422	Klf4	11.4961	6.8504e-28	2.73644	Mcm3	9.47469	6.75763e-19	1.45316	Xaf1	3.18399	0.72114	2.67361
Pim1	6.73002	2.83992e-09	0.541317	Slc3a2	11.3246	4.75843e-27	0.977088	Snrpd1	9.39093	1.42702e-18	0.82684	Ddx58	3.15047	0.782268	2.52738
mt-Co3	6.71483	3.1157e-09	0.10528	Id1	11.0145	1.51117e-25	2.59337	Hspd1	8.85475	1.74995e-16	0.692183	Ifi47	3.09813	0.847049	2.07433
Rps14	6.43676	1.91e-08	0.0799738	Skil	10.8178	1.27538e-24	2.68288	Eif4a1	8.72005	5.56066e-16	0.520031	Shisa5	3.09379	0.847049	1.35464
PISD	6.43153	1.95556e-08	0.471918	Hes1	10.7755	1.95934e-24	3.39375	Nasp	8.60667	1.48338e-15	1.7947	Epsti1	3.09059	0.847049	1.80163
Malat1	6.35489	3.12808e-08	0.180989	Rbm39	10.7204	3.45714e-24	0.351832	Atp5g1	8.57146	1.98805e-15	0.625667	Slfn5	3.08683	0.847049	3.4477
Gimap5	6.28647	4.77118e-08	0.583617	Elf1	10.6425	7.7721e-24	0.969919	Hnrnpf	8.56121	2.1413e-15	0.489418	Ube2l6	3.08155	0.847049	1.64494
Lmo2	6.12084	1.32685e-07	0.231686	Avl9	10.3526	1.62941e-22	1.15573	Atpif1	8.55983	2.1413e-15	0.515577	Oas1a	3.07308	0.847267	3.23428
Rps9	6.08498	1.64448e-07	0.0833432	Ier3	10.0117	5.267e-21	1.61618	Mcm6	8.52999	2.73649e-15	1.2166	Treml2	2.97008	1	1.46106
Tmem176a	6.04817	2.04773e-07	0.37583	Prdx6	9.87945	1.93657e-20	0.51365	Npm1	8.48697	3.91485e-15	0.242688	Timm8b	2.96895	1	1.24813
Pfdn5	5.93138	4.08014e-07	0.229036	Nfkbiz	9.7427	7.31703e-20	1.96083	Srsf3	8.37185	1.02079e-14	0.583051	Psmb2	2.96292	1	0.971082
Eef1a1	5.78157	9.51306e-07	0.0780832	Tra2b	9.52399	5.99846e-19	0.657724	Cfl1	8.24081	3.00319e-14	0.457661	F2r	2.9601	1	2.89267
Tbxas1	5.70784	1.45779e-06	0.37828	Dnajb1	9.21497	1.09334e-17	1.26198	Mcm2	8.14386	6.64139e-14	1.79463	Gbp2	2.89382	1	2.30043
Zfp950	5.6461	2.05473e-06	0.592652	Tsc22d2	8.90411	1.84475e-16	1.58738	Rpsa	8.11351	8.42852e-14	0.179979	Ly6a	2.89062	1	1.79427
Eif4a2	5.56921	3.12216e-06	0.26678	Malat1	8.58569	2.99265e-15	0.211708	Hmgb3	8.07016	1.17528e-13	0.921332	Lgals3bp	2.87593	1	1.54543
Ypel3	5.50113	4.45334e-06	0.364278	Klf9	8.58421	2.99265e-15	1.51021	Dnmt1	7.84003	7.26426e-13	1.41269	Hdgf	2.8731	1	1.41666
Smpdl3a	5.48163	4.93275e-06	0.348944	2810403A07Rik	8.39261	1.52124e-14	1.08822	Sumo2	7.82829	7.82419e-13	0.35691	Gbp7	2.79929	1	1.91655
Rplp1	5.47109	5.19305e-06	0.102284	Tra2a	8.05049	2.581e-13	0.539469	Nop58	7.82309	8.06555e-13	0.832736	Neat1	2.78103	1	1.26687
mt-Co2	5.42508	6.56676e-06	0.107665	D8Ertd738e	7.90108	8.46966e-13	0.602151	Dynll1	7.74286	1.50482e-12	0.708759	Samhd1	2.77858	1	1.84651
Lst1	5.39654	7.58229e-06	0.39138	Tsc22d1	7.7931	1.96106e-12	0.567406	Hnrnpa1	7.70394	1.99944e-12	0.480147	Psmb8	2.71531	1	0.919816
Rps24	5.3577	9.26342e-06	0.0713523	Ctla2a	7.70486	3.84852e-12	0.624888	Snrpf	7.69206	2.17138e-12	0.460086	F830016B08Rik	2.70834	1	3.35991
Cd74	5.35436	9.36469e-06	1.00481	Ccnt1	7.67299	4.83834e-12	1.02821	Rps17	7.68145	2.33474e-12	0.142629	Ncoa7	2.69855	1	1.84886
Pik3r1	5.33769	1.01145e-05	0.396636	Fam110a	7.63036	6.60851e-12	1.45252	Rpl36al	7.67207	2.47098e-12	0.398014	Flii	2.6865	1	1.94964
Rpl13	5.30194	1.20406e-05	0.0602212	Mcl1	7.61404	7.35524e-12	1.44983	Hspe1	7.67156	2.47098e-12	0.455708	Parp14	2.67332	1	2.34374
Prtn3	5.20152	2.01832e-05	0.334317	Ddx3x	7.25864	1.06211e-10	0.849362	Atp5b	7.62788	3.43573e-12	0.39408	Ccnd2	2.66032	1	0.766688
Rpl13a	5.12781	2.97192e-05	0.0685381	Gm26532	7.14477	2.40349e-10	2.27616	Snrpb	7.62025	3.57361e-12	0.430964	Tmem176a	2.65599	1	0.739404
Mycn	5.09471	3.51639e-05	0.475719	Ubb	7.10266	3.20347e-10	0.171292	Tipin	7.60499	3.98265e-12	1.47319	B2m	2.65411	1	0.319265
Cd81	5.0539	4.29806e-05	0.232301	Nap1l3	6.93035	1.0603e-09	1.17484	Hsp90ab1	7.53442	6.79035e-12	0.224943	AW112010	2.6479	1	1.06477
Gng11	5.04324	4.48281e-05	0.300275	Taf7	6.74127	3.83134e-09	0.59423	Pa2g4	7.52188	7.32276e-12	0.75908	Dlgap4	2.6398	1	2.13361
Rbm5	5.00328	5.44615e-05	0.391482	Spty2d1	6.7362	3.90129e-09	1.05112	Rpl4	7.51396	7.57696e-12	0.163607	Smim24	2.60026	1	2.06493
Sepp1	4.94789	7.15314e-05	0.439864	Socs3	6.63618	7.59768e-09	2.83567	Oaz1	7.42606	1.4382e-11	0.272846	Tspo	2.56486	1	0.870117
Apobec3	4.94297	7.28784e-05	0.351144	Jmjd1c	6.45751	2.43233e-08	0.751253	Minos1	7.39342	1.82314e-11	0.603678	Nmi	2.55695	1	1.63236
Rps3a1	4.88208	9.81369e-05	0.0580897	Sfr1	6.45026	2.51177e-08	0.42235	2010107E04Rik	7.34756	2.50522e-11	0.645108	Nol12	2.55375	1	1.85041
Laptm4a	4.85654	0.000110244	0.246648	Arhgap31	6.37281	4.0486e-08	0.921539	C1qbp	7.3186	3.05713e-11	0.781009	Kctd10	2.54414	1	1.89849
Hmha1	4.83264	0.000122771	0.501746	Hspa5	6.33482	5.10604e-08	0.446485	Siva1	7.26613	4.43488e-11	0.831319	Oasl1	2.5336	1	4.65242
Socs2	4.78396	0.000155628	0.636042	Arpc3	6.24605	8.91247e-08	0.340911	Ak2	7.26511	4.43488e-11	0.798818	Nt5c3	2.45922	1	1.1158
Cers4	4.78026	0.000157533	0.443021	Ftl1	6.18209	1.31989e-07	0.149769	Crip1	7.25723	4.66262e-11	0.863551	Myl12a	2.4402	1	0.776478
Gabarapl1	4.75198	0.000179013	0.364386	Klf2	6.11506	1.98519e-07	2.69578	Ung	7.21024	6.48486e-11	2.91052	Isg20	2.42306	1	2.17145
Eef2	4.72696	0.000198859	0.132897	Dnajb9	6.03441	3.23522e-07	0.929913	Dtymk	7.1634	8.99251e-11	0.914659	Usp18	2.41082	1	3.76635
Sepw1	4.71673	0.000206188	0.225007	Hist1h1c	5.98394	4.3552e-07	0.836551	Eif3a	7.13992	1.03417e-10	0.616364	Jun	2.39858	1	0.951242
Rpl19	4.71594	0.000206188	0.059926	Fbxw2	5.84274	9.99026e-07	0.640151	Cnbp	7.05674	1.87324e-10	0.390997	AI314180	2.39124	1	1.5956
Use1	4.70813	0.000211719	0.229098	Hist1h2bc	5.83874	1.00963e-06	0.894169	Tuba1b	7.03636	2.13605e-10	0.635396	Wbp1l	2.36601	1	1.93922
Rpl7	4.63871	0.000293456	0.0703073	Cdkn1a	5.70947	2.14685e-06	2.38206	Hsp90b1	7.02124	2.36267e-10	0.608255	Mitd1	2.36544	1	2.31386
AW112010	4.6084	0.000333824	0.314471	Pnrc1	5.67987	2.50644e-06	0.819997	Chchd2	7.01052	2.53207e-10	0.317133	Mageh1	2.34548	1	1.83573
Tmem59	4.57251	0.000385455	0.260131	Dpm1	5.6074	3.74311e-06	0.554969	Tkt	7.00224	2.66671e-10	0.577644	Poglut1	2.34228	1	2.31463
Taz	4.56504	0.000397233	0.561971	S1pr1	5.49742	6.76627e-06	1.86048	Actg1	6.98349	3.02595e-10	0.336743	Skil	2.34059	1	1.91724
Cbx6	4.56267	0.000399535	0.39586	Rhob	5.0915	5.81196e-05	1.2101	Uqcc2	6.95212	3.7539e-10	0.826179	Cmpk2	2.33701	1	3.34184
Adgrg1	4.56076	0.00040099	0.224867	Pde10a	5.06445	6.6256e-05	3.74942	Anp32b	6.89838	5.44796e-10	0.79641	Pdlim1	2.33419	1	1.16128
Sult1a1	4.49079	0.000546315	0.67255	Tmx4	4.97467	0.00010228	0.573496	Ndufa4	6.89722	5.45349e-10	0.34101	Mecom	2.33343	1	1.19628
Rpl30	4.43631	0.000689808	0.0793058	Rhoh	4.9148	0.000137584	0.496835	Ddx39	6.88155	6.04497e-10	1.20913	Ddx60	2.32119	1	2.37056
Arl6ip5	4.42097	0.000732959	0.383936	Atf4	4.90591	0.000142428	0.595035	G3bp1	6.8736	6.30276e-10	0.527928	Zbp1	2.3131	1	3.27726
Ifi203	4.39923	0.000801666	0.311517	Atf3	4.89196	0.000149724	4.10029	Dkc1	6.85663	7.00047e-10	0.847145	Ccnl1	2.30368	1	1.1426
Anxa5	4.38918	0.000831517	0.280585	Tssc4	4.86608	0.000168954	0.771756	Sec61b	6.85532	7.01645e-10	0.451334	9930111J21Rik2	2.29521	1	3.25411
Rgs18	4.38645	0.000837776	0.257772	Cenpa	4.82954	0.000201047	1.14808	Gnl3	6.83748	7.84058e-10	0.852952	Ndufa10	2.29295	1	1.16087
Rabac1	4.37193	0.00088652	0.247463	Ctla2b	4.66636	0.000432733	0.638406	Fbl	6.81542	9.08168e-10	0.602395	Klf6	2.28824	1	1.26289
Tnip3	4.35319	0.000961013	0.560922	Dnttip2	4.63356	0.000502389	0.466915	Gar1	6.71977	1.74689e-09	0.752474	Ubc	2.25397	1	0.669474
Serpina3g	4.33157	0.00104998	0.336832	Tiparp	4.60332	0.000564753	1.52163	Psma7	6.68758	2.1633e-09	0.42509	Abhd17b	2.24324	1	2.97255
Ppdpf	4.26257	0.00141637	0.301631	Gem	4.37329	0.00153216	1.21327	Mcm7	6.67944	2.27188e-09	1.35837	Gpatch8	2.22271	1	1.34723
Clec2d	4.26194	0.00141637	0.580863	Jund	4.30147	0.00210584	0.905858	Prmt1	6.67352	2.35007e-09	0.661656	H2-T22	2.22196	1	1.21372
Glul	4.25377	0.00146198	0.254805	Selk	4.29513	0.00214833	0.223253	H3f3a	6.66043	2.55239e-09	0.244786	Irgm2	2.2197	1	2.82751
Iigp1	4.23063	0.0015996	0.732276	Rnf4	4.178	0.00344222	0.540891	Hells	6.63082	3.0809e-09	2.36213	Fos	2.218	1	1.41253
Uba7	4.21104	0.00172626	0.293358	Cirbp	4.15707	0.00371278	0.306294	Banf1	6.62261	3.23634e-09	0.874985	Prr3	2.21348	1	2.14146
H2-T22	4.18453	0.00190465	0.312287	Ddx17	4.15233	0.00376036	0.434381	Prdx1	6.60222	3.66761e-09	0.444924	Nub1	2.19334	1	1.67871
Pik3ip1	4.15838	0.00211668	0.330226	Smad7	4.12141	0.00423533	1.39245	U2af1	6.59462	3.83622e-09	0.562155	Nrros	2.19126	1	1.20938
Capns1	4.11171	0.00255852	0.22964	Stk17b	4.07129	0.00517788	1.02107	Snrpd3	6.52445	6.10307e-09	0.639406	Trim12a	2.18016	1	1.34374
Hhex	4.09908	0.002678	0.332289	P2rx4	4.06329	0.00531756	0.641947	Slbp	6.48495	7.88807e-09	0.934314	1810030O07Rik	2.17884	1	1.9937
H2-Q6	4.06977	0.00299786	0.399982	Csde1	4.05155	0.00554926	0.330672	Npm3	6.48136	8.02894e-09	0.640262	Ndufs5	2.17055	1	0.860774
Gabarap	4.04951	0.00322669	0.225222	Rpl22l1	4.02592	0.00609758	0.120068	Calr	6.42786	1.12235e-08	0.44123	Stat2	2.15907	1	2.53167
Ldhb	4.01502	0.00370468	0.248507	Vgll4	3.96577	0.00780206	0.326654	Rps11	6.38844	1.42768e-08	0.105735	Aftph	2.15662	1	1.3848
Prr13	3.96974	0.00431475	0.281292	Nfkbid	3.95415	0.00812701	2.16426	Pgls	6.38687	1.43386e-08	0.708033	Gbp5	2.15662	1	2.86951
Rpl5	3.95307	0.00459015	0.0775937	Isca1	3.95108	0.00812701	1.39727	Etfb	6.35635	1.72935e-08	0.608863	Tmbim6	2.15342	1	0.685812
Rps23	3.92355	0.00516953	0.045999	Akap13	3.92713	0.00877746	0.275526	Fubp1	6.33248	2.00775e-08	0.573421	Irf1	2.14475	1	1.77621
Slc25a11	3.91101	0.00540106	0.287144	Serinc1	3.84003	0.0122994	0.440935	Shfm1	6.30882	2.31317e-08	0.381958	Trim30a	2.13666	1	1.38664
Ly6e	3.90688	0.00547184	0.1903	Adgre5	3.79002	0.0148481	1.23031	Cdk4	6.29221	2.56016e-08	0.590606	Ppa1	2.13383	1	1.18385
Tinagl1	3.8766	0.00610693	0.645313	Tmed5	3.73885	0.01751	0.461633	Tmem14c	6.28058	2.7436e-08	0.779454	Prpf31	2.13063	1	1.26852
Gm4951	3.87241	0.00618123	0.688897	Ddx24	3.66536	0.0229416	0.267576	Hint1	6.27826	2.7693e-08	0.356119	H2-Q4	2.12517	1	1.38121
Rps27rt	3.87044	0.00620677	0.285346	Nhp2l1	3.65798	0.0234606	0.234307	Psmb3	6.26848	2.93234e-08	0.634608	Capza2	2.11802	1	0.929305
Lpar6	3.85586	0.00656252	0.543056	Cd24a	3.62408	0.0260938	0.271225	Apex1	6.25344	3.21143e-08	0.786738	Usp5	2.10088	1	1.97558
Rpl37a	3.83879	0.0070081	0.0644088	Neurl3	3.58326	0.0297885	0.466452	Atp5j	6.25057	3.25295e-08	0.376693	Taf7	2.10032	1	1.05114
Ifi47	3.77745	0.00887587	0.438431	Btg1	3.57472	0.0305918	1.20352	Nolc1	6.21903	3.95721e-08	0.944327	Mcts1	2.09919	1	1.26101
Smtnl1	3.76457	0.00927376	0.995587	Tox4	3.55133	0.0330434	0.481635	Cmtm7	6.21492	4.03989e-08	0.528768	Shmt2	2.09711	1	1.90566
Agpat4	3.73509	0.0101947	0.742313	Acyp1	3.5469	0.0334035	0.268459	Fam162a	6.19802	4.4738e-08	0.746657	Ube2v2	2.07866	1	1.41504
Uqcrh	3.73129	0.010287	0.09025	Rgcc	3.53956	0.0341438	0.846523	Cox6c	6.17894	5.02197e-08	0.394415	Emc10	2.07376	1	1.01917
Rpl23a-ps3	3.70478	0.0111577	0.177072	Vamp3	3.49284	0.0393174	0.508369	Hnrnpa2b1	6.16001	5.60018e-08	0.388473	Apbb1ip	2.07151	1	1.24599
Pnisr	3.70323	0.0111851	0.210212	Marcksl1	3.47277	0.0418993	0.422071	Lig1	6.15692	5.68008e-08	1.92583	Irf9	2.06774	1	1.43216
Lsp1	3.66199	0.0127316	0.319002	Sat1	3.44071	0.0458954	0.436541	AI662270	6.13501	6.48654e-08	0.590594	BC031181	2.05832	1	1.0208
Limd2	3.64341	0.0135824	0.222782	Tsc22d3	3.43542	0.0464072	0.308122	Syce2	6.10816	7.55759e-08	1.08688	Sfr1	2.04684	1	0.866159
Nceh1	3.63931	0.0137134	0.325755	Spry1	3.43171	0.0466773	1.88677	Ezh2	6.08534	8.62691e-08	1.21887	Mrpl28	2.03742	1	1.21377
Serpinb6a	3.62837	0.0142083	0.582014	Gm26699	3.40601	0.0502536	0.452557	Sdf2l1	6.06626	9.617e-08	1.60545	Fam133b	2.03441	1	1.19077
Rpl24	3.58474	0.0166936	0.060551	Zfp36l2	3.40143	0.0507942	0.244942	Pebp1	6.04656	1.08138e-07	0.325062	Zfp30	2.03384	1	2.32006
Rpl6	3.57429	0.0171971	0.103896	Zfos1	3.38625	0.0525828	0.208577	Hnrnpab	6.0039	1.40068e-07	0.82881	Ehd4	2.02707	1	1.59771
Gtpbp2	3.57071	0.0173485	0.403363	Purb	3.36184	0.0565825	0.597838	Nhp2	5.9834	1.58093e-07	0.684609	Tpm3	2.02631	1	0.663844
Rps6	3.54301	0.0190061	0.0401328	S100a10	3.35231	0.0582706	0.214729	Abracl	5.97821	1.62402e-07	0.615433	Diablo	2.02368	1	1.17669
Gltscr2	3.54289	0.0190061	0.160464	Nceh1	3.30781	0.0660357	0.319715	Mrpl18	5.96545	1.74738e-07	0.666075	Cuedc2	2.02273	1	0.945475
Chmp2b	3.53833	0.0191957	0.463548	Tnfaip2	3.27612	0.0724971	1.20172	Tomm5	5.93642	2.07627e-07	0.568814	Zfp839	2.02066	1	3.65262
Fxyd5	3.52543	0.0198923	0.140664	Sertad2	3.25796	0.0761026	0.535437	Srsf2	5.90956	2.43269e-07	1.10337	Pafah1b3	2.02029	1	1.2531
Arl6ip1	3.52026	0.0202175	0.186049	Ncf2	3.25568	0.0761026	0.501908	Gpx1	5.89416	2.6578e-07	0.4046	Snw1	2.0088	1	0.828367
Naca	3.51304	0.020598	0.0732784	Fth1	3.22279	0.0842067	0.0863844	Cks2	5.87257	2.99882e-07	1.12471	Apobec3	2.00654	1	0.829779
H2-M3	3.50797	0.0208363	0.624169	Trib1	3.19707	0.0904417	1.40435	Eif2s1	5.84655	3.47372e-07	0.731291	Abcf1	2.00579	1	1.03477
Oat	3.50627	0.0209029	0.462984	Ccl4	3.1936	0.0911244	0.568321	Phgdh	5.83801	3.63899e-07	0.558092	Trim30c	1.99882	1	3.57586
Rab38	3.469	0.0237252	0.183488	Pde4b	3.19012	0.0918131	0.486114	Srpk1	5.83594	3.65276e-07	0.683184	Stat3	1.99807	1	1.24994
Trim12a	3.46023	0.0243584	0.415549	Zbtb20	3.14774	0.103898	0.243033	Ssr4	5.83456	3.66257e-07	0.486546	Dnajc11	1.99035	1	1.75328
Ikzf2	3.44987	0.0250072	0.401724	Wdr45b	3.13975	0.105739	0.560146	Rpl41	5.78187	4.94687e-07	0.160206	Ifit2	1.98978	1	3.52178
Cyba	3.44978	0.0250072	0.168677	Sub1	3.13858	0.105739	0.146334	Cycs	5.76279	5.51444e-07	0.989083	Cript	1.98526	1	1.05854
Ssbp2	3.4465	0.0252346	0.210192	Csrnp1	3.12874	0.107552	1.04941	Snrpd2	5.74611	6.0308e-07	0.413082	Arl4a	1.98357	1	1.42433
Luc7l3	3.44261	0.0255213	0.245899	Eif4a2	3.12549	0.10829	0.157718	Cdk6	5.73158	6.54119e-07	1.29081	Ssu72	1.97001	1	0.90839
Rpl14	3.43933	0.0257091	0.0486265	Plk2	3.11559	0.111049	0.928381	Hmgb2	5.7222	6.88128e-07	0.687483	Ginm1	1.96474	1	1.73506
Gm6483	3.43897	0.0257091	0.292168	Rps14	3.08378	0.120107	0.0407534	Rbmxl1	5.69724	7.89662e-07	0.680753	Tap1	1.96286	1	1.4015
Rpl26	3.438	0.0257228	0.0515372	Chka	3.06623	0.126355	0.856173	Atp5f1	5.69324	8.04757e-07	0.374738	Itgb1bp1	1.95664	1	1.567
Mgst1	3.42072	0.0271655	0.733637	Zfand5	3.0646	0.126533	0.562022	Snrpa1	5.68597	8.35997e-07	0.752717	Lfng	1.95532	1	2.15315
Eef1d	3.39873	0.0290943	0.12036	Cebpz	3.04505	0.13344	0.265428	Nudc	5.63263	1.13567e-06	0.511631	Psmb9	1.95231	1	0.909672
Madd	3.36132	0.0329944	0.596544	D930015E06Rik	3.02332	0.141157	0.725284	Dnph1	5.61933	1.22122e-06	1.35753	Zufsp	1.94836	1	2.07764
Tmbim6	3.35464	0.033389	0.205095	Uqcrfs1	3.016	0.143482	0.227561	Mcm5	5.6053	1.31853e-06	1.90168	Mrpl23	1.94534	1	0.733879
Ecscr	3.35437	0.033389	0.691032	Prtn3	3.0038	0.14764	0.196691	Lyar	5.58313	1.47226e-06	0.731918	Mat2a	1.93819	1	0.831071
Clec1a	3.3363	0.0351248	0.60093	Tecpr1	2.97826	0.157492	0.802308	Rpl28	5.55897	1.66965e-06	0.133375	Sepp1	1.93819	1	0.927523
Cd27	3.33031	0.0356832	0.335852	Map1lc3b	2.95718	0.167401	0.166792	Hspa8	5.54992	1.75093e-06	0.189631	Tsc22d2	1.93593	1	1.41
Gabarapl2	3.31528	0.0373387	0.211393	egfp	2.95604	0.167401	2.70616	Sfxn1	5.49072	2.44195e-06	0.738849	Zc3hc1	1.92501	1	1.58472
Traf3ip3	3.2963	0.0396187	0.301301	Vmp1	2.94919	0.169892	0.387437	Gmnn	5.48037	2.57837e-06	1.81869	Hspa5	1.91559	1	0.820689
H2-Q7	3.29381	0.0398594	0.189999	Ythdc1	2.93317	0.176853	0.466561	Supt16	5.47466	2.65164e-06	0.679017	Actl6a	1.90806	1	1.081
A630072M18Rik	3.29287	0.0398813	0.454735	Krt18	2.93041	0.177224	0.220459	Rrbp1	5.45958	2.86297e-06	0.59355	Fam207a	1.89055	1	1.96995
Ppil2	3.28935	0.0401596	0.364173	Tgoln1	2.92638	0.178238	0.507112	Ssrp1	5.43073	3.35281e-06	0.554539	Sri	1.88433	1	0.708276
Nt5c3	3.28835	0.0401911	0.235508	Klf10	2.90757	0.182721	0.541776	H2afy	5.42887	3.35993e-06	0.603064	Upp1	1.88132	1	1.59838
Ppfibp2	3.25728	0.0441268	0.804939	Ndufa6	2.9029	0.184825	0.182312	Atp5l	5.41423	3.63188e-06	0.261211	Psmd9	1.87981	1	1.32958
Celf2	3.25011	0.0449928	0.224925	Dock2	2.88891	0.192159	0.34624	Eif1ax	5.4054	3.79826e-06	0.609462	Snx6	1.87774	1	1.0445
Mesdc2	3.2277	0.0479091	0.336258	Pofut2	2.88344	0.19284	0.796265	Fabp5	5.40475	3.79826e-06	0.914556	Ttc5	1.87567	1	1.32773
Mpl	3.22299	0.048445	0.243271	Zc3h12a	2.88095	0.19284	1.94695	Ppa1	5.37902	4.33028e-06	0.575576	Usp36	1.87021	1	2.06014
Fam32a	3.20061	0.0518199	0.229862	Stk26	2.87831	0.193809	0.538328	Fam111a	5.3708	4.51409e-06	1.19812	Trafd1	1.86626	1	1.52726
AI480526	3.19824	0.0521107	1.13798	Dusp6	2.86927	0.1981	1.06867	Mrpl12	5.36779	4.57192e-06	0.663585	Rrbp1	1.86193	1	0.922552
Map1lc3b	3.19402	0.0527407	0.151304	Erg	2.84327	0.212169	0.358512	Hmgn1	5.36034	4.74562e-06	0.509419	Rbm3	1.84291	1	0.645263
Itsn1	3.18822	0.0535307	0.427074	Etv3	2.83337	0.216	0.75361	Ybx1	5.33745	5.36416e-06	0.743679	Xist	1.83688	1	1.21186
Efcab14	3.18321	0.0541843	0.344509	Ctsh	2.80307	0.229586	0.521694	Ptges3	5.32505	5.72042e-06	0.50646	S100a6	1.81654	1	1.03252
Lcp1	3.16618	0.0571651	0.23765	Zcchc6	2.75134	0.257377	0.375801	Manf	5.27487	7.41333e-06	0.583252	Uqcrb	1.81127	1	0.59195
Slfn2	3.16138	0.057818	0.456787	Zfand6	2.74058	0.263575	0.221277	Myc	5.26884	7.63151e-06	0.907626	Camk2d	1.80901	1	1.1889
Rps15	3.15124	0.0594083	0.0547504	Ppp4c	2.73911	0.263972	0.279343	Mat2a	5.25525	8.12307e-06	0.437023	Wdr89	1.80751	1	0.628161
Trib3	3.13939	0.0612411	0.884326	Chd2	2.71215	0.280587	0.276244	Hnrnpu	5.21186	1.02343e-05	0.610642	Cbll1	1.80148	1	1.8027
Camk2d	3.13204	0.062481	0.35527	Med16	2.68707	0.297352	0.884121	Rpl22l1	5.19423	1.12102e-05	0.200666	Tpp2	1.8011	1	1.465
Wbp2	3.11376	0.0659283	0.349896	S100a11	2.66076	0.316183	0.148456	Srm	5.19296	1.12445e-05	1.27408	Ogfr	1.80054	1	1.29899
Pold4	3.1059	0.0671046	0.321365	Utp14b	2.6556	0.319703	1.21682	Fkbp2	5.18835	1.14449e-05	0.842599	Dtx3l	1.79433	1	1.86636
Myct1	3.10259	0.0676933	0.186036	Akap8l	2.64945	0.323322	0.31024	Tma7	5.17472	1.22617e-05	0.374571	Samd9l	1.78604	1	1.85935
Utp11l	3.05877	0.0765491	0.227166	Cox7c	2.64487	0.325915	0.112314	Rexo2	5.1712	1.24489e-05	0.6432	Dyrk1a	1.78416	1	2.53105
Pdrg1	3.04744	0.0789274	0.186945	Ypel3	2.63752	0.332139	0.184584	Rpl18	5.14518	1.41466e-05	0.101811	Psmg3	1.77003	1	1.41724
Gm12216	3.03979	0.080477	0.437031	Dyrk3	2.63365	0.335026	0.861788	Rpl32	5.14114	1.44008e-05	0.0682155	Borcs6	1.76307	1	1.77054
Ptprcap	3.03945	0.080477	0.129231	Csnk1a1	2.61546	0.343939	0.158132	Dtnbp1	5.12959	1.5202e-05	0.854711	Ywhag	1.76043	1	1.48754
Abcg2	3.03408	0.0813493	0.25689	Zfp830	2.60534	0.352369	0.420381	Phb2	5.1241	1.55947e-05	0.48042	Clic1	1.75535	1	0.222837
Tmem50a	3.03104	0.0817888	0.184093	Fbxo30	2.57559	0.374204	1.28776	Stra13	5.04528	2.32019e-05	0.575207	Aco2	1.748	1	1.13651
Ctsb	3.02451	0.0831956	0.308773	Cnot2	2.54919	0.395719	0.460728	Cox7b	5.04205	2.35139e-05	0.467028	Cr1l	1.73727	1	0.823338
Rpl18a	3.01324	0.085545	0.0343355	Triobp	2.54904	0.395719	0.299247	Sfpq	5.04089	2.35737e-05	0.633923	Grb10	1.72785	1	1.33524
Tspan14	3.00699	0.0865296	0.361007	Zfp467	2.54722	0.396772	0.333758	Tmem147	5.03423	2.43209e-05	0.611052	Cnn2	1.72239	1	1.03704
Tspan32	3.00328	0.0871928	0.144862	Kdm6b	2.53856	0.403664	0.707144	Ldha	5.03245	2.44618e-05	0.300301	Eprs	1.72202	1	0.791969
Paip2	2.99812	0.0882832	0.138659	Prpf38b	2.52995	0.409969	0.249619	Smarcc1	5.01966	2.58757e-05	0.628392	Lgals9	1.72013	1	1.21115
Sdf4	2.99229	0.0895826	0.204903	Tmem41b	2.51089	0.424273	0.649491	Eif3i	5.0012	2.81873e-05	0.32068	Usb1	1.71995	1	2.3004
Cd84	2.98716	0.0904903	0.358873	Foxp1	2.50997	0.424273	0.232775	Ywhah	4.98423	3.06716e-05	0.56462	Cdk2ap2	1.71693	1	0.78522
Zfp945	2.98096	0.0921355	0.516573	Pik3r1	2.50186	0.429561	0.204781	Mcm4	4.98256	3.08323e-05	1.69467	Smim19	1.7013	1	2.32363
Plin3	2.9635	0.0962417	0.374765	Csnk1d	2.50106	0.429561	0.34083	Exosc5	4.95651	3.51464e-05	0.70203	Pfdn1	1.7013	1	0.884463
Meis1	2.9604	0.0970016	0.164792	Hmgcr	2.47838	0.450272	0.449031	Ywhaq	4.95026	3.61711e-05	0.42594	Polr3gl	1.69848	1	1.42907
Cd63	2.95148	0.0994145	0.146932	Rnf138	2.46749	0.456617	0.371806	Higd1a	4.94517	3.68787e-05	0.750964	Uqcr11	1.69622	1	0.671492
mt-Nd4	2.93623	0.10353	0.0670773	Zfp36l1	2.4284	0.495102	0.70828	Ndufs6	4.94135	3.74817e-05	0.58879	Smg6	1.69434	1	0.995178
Uqcrc2	2.93432	0.103945	0.204477	Ldhb	2.39653	0.531896	0.200709	Cks1b	4.93688	3.80949e-05	0.89356	Ms4a6c	1.69038	1	2.35143
Plgrkt	2.93316	0.104107	0.188644	Cript	2.39198	0.536141	0.259194	Uqcrq	4.93325	3.86819e-05	0.532346	Dhx58	1.68737	1	2.48088
Fam134b	2.92715	0.10546	0.293606	C87436	2.38291	0.540878	0.434228	Cct3	4.91871	4.13925e-05	0.442932	Cflar	1.68643	1	1.32543
AI467606	2.91051	0.110532	0.466102	Pafah1b1	2.3823	0.540878	0.170315	Rps2	4.90818	4.35356e-05	0.144593	Med29	1.6853	1	1.30907
Cnpy2	2.89812	0.113784	0.19092	Pag1	2.37916	0.544267	0.602213	Anp32e	4.85025	5.78249e-05	0.613043	H2-DMb1	1.68511	1	1.25034
Oaz2	2.89566	0.114199	0.321701	Pcf11	2.37547	0.547945	0.367261	Fkbp4	4.83096	6.3105e-05	0.488386	Rgs2	1.6836	1	0.937655
Parp14	2.87881	0.118809	0.731738	Arrdc3	2.37507	0.547945	1.17111	Psmd7	4.82674	6.42477e-05	0.485844	Tmem261	1.67852	1	0.924544
1110032A03Rik	2.87862	0.118809	0.521576	Bhlhe40	2.36714	0.554612	2.42177	Tceb2	4.81853	6.67345e-05	0.330755	Psma3	1.67626	1	0.612196
Rint1	2.87061	0.121114	0.457346	Arl4a	2.36582	0.554612	0.330629	Srsf1	4.80595	7.0842e-05	0.698031	Ube2d3	1.67193	1	0.688281
Fam213a	2.86635	0.122501	0.281813	Dusp2	2.34947	0.572233	1.2294	Ebna1bp2	4.80108	7.23556e-05	0.588019	Tgm2	1.66647	1	0.975694
H2-T23	2.86353	0.123346	0.215395	Cggbp1	2.34612	0.576184	0.293589	Cct8	4.79676	7.36999e-05	0.427606	Acp1	1.66346	1	0.850153
Gm10073	2.83237	0.134655	0.145567	Adrb2	2.34	0.583247	0.749332	Naa50	4.79436	7.4351e-05	0.827724	Arf4	1.65875	1	0.714856
Mcfd2	2.82748	0.136177	0.467673	Gltscr2	2.33057	0.595644	0.125434	Rpl39	4.79098	7.51389e-05	0.121566	Pdcl3	1.65517	1	0.940839
Rps5	2.82445	0.137198	0.038547	Msi2	2.3263	0.601212	0.175915	Pcbp1	4.73815	9.65552e-05	0.533067	Dnajb6	1.65235	1	0.904277
Npc2	2.82281	0.137625	0.150579	Slc38a2	2.31772	0.610545	0.305351	Cbx3	4.73789	9.65552e-05	1.12123	Mat2b	1.65009	1	0.774248
Lyl1	2.81977	0.138588	0.14061	Saraf	2.31738	0.610545	0.130018	Ube2k	4.72761	0.000100948	0.596104	Coro1a	1.64877	1	0.587123
S1pr4	2.81928	0.138588	0.350821	Ptprc	2.3053	0.622266	0.231596	Taldo1	4.719	0.000104993	0.527699	Rps15a	1.64594	1	0.129002
Rac2	2.81321	0.14039	0.120591	Mbnl2	2.30463	0.622266	0.279856	Nsun2	4.71118	0.000108765	0.613498	Eif4h	1.63935	1	0.643686
Gcnt2	2.81002	0.141508	0.228229	Mmrn1	2.30272	0.622266	0.227804	Serf2	4.6928	0.000118291	0.225388	Clint1	1.63916	1	1.58238
Hnrnph3	2.79557	0.146829	0.245123	Appl1	2.30247	0.622266	0.368358	Swi5	4.68469	0.000122695	0.321164	Isoc2b	1.63352	1	2.05537
Pou2f2	2.79487	0.146857	0.455435	Vim	2.29479	0.631383	0.198215	Cisd1	4.66529	0.000134454	0.677872	Zc3h7b	1.63107	1	1.59227
Fcgrt	2.78151	0.152315	0.49417	Tln1	2.27718	0.650594	0.118824	Cacybp	4.66423	0.000134736	0.451859	Parp12	1.63013	1	3.69588
Cd82	2.78114	0.152315	0.527178	Fam213a	2.27131	0.656761	0.256744	Eef1g	4.64988	0.000144026	0.163661	Rplp1	1.629	1	0.205618
Ubl7	2.77565	0.154311	0.206773	Pitpnc1	2.26971	0.657511	0.366313	Atp5e	4.64399	0.000147229	0.387354	Tmed2	1.62806	1	0.829731
Rtp4	2.77419	0.154704	0.481842	Smg6	2.26787	0.657511	0.263163	Atad3a	4.64348	0.000147229	0.781353	Nop58	1.61996	1	0.754755
Rpl37	2.77191	0.155488	0.0425483	Fchsd2	2.25908	0.670139	0.284622	Ctla2a	4.63062	0.000156213	0.460415	Rpl9	1.61845	1	0.522992
Rcsd1	2.76927	0.156452	0.397809	Tubb4b	2.25908	0.670139	0.19153	Ruvbl2	4.62346	0.000160748	0.738754	Trim34a	1.61619	1	2.12962
Psenen	2.75512	0.163067	0.133469	Suco	2.25072	0.681322	0.682466	Mlec	4.61041	0.000170668	0.704143	Gm13822	1.61412	1	3.59065
Hmox2	2.75415	0.163237	0.243728	Ccpg1	2.25047	0.681322	0.74723	Polr3k	4.59323	0.000184808	0.743341	Mrpl16	1.60941	1	1.28276
Glrx	2.75096	0.164201	0.351722	Cmtm7	2.23252	0.696189	0.157443	Hnrnpa3	4.57971	0.000196586	0.426952	Rcc2	1.60602	1	0.986844
Eif3e	2.73665	0.170134	0.135695	Supt6	2.2205	0.710187	0.447695	Srsf6	4.55841	0.000216338	0.518056	Mbtd1	1.6015	1	1.22645
Rpl35a	2.7205	0.177736	0.0442902	Morf4l1	2.21423	0.716185	0.119594	Hirip3	4.55765	0.000216494	1.22437	Plscr4	1.59793	1	1.52062
Dcun1d1	2.71968	0.177832	0.195355	Ipo11	2.20381	0.730124	0.2399	Exosc1	4.54933	0.000223932	0.779575	Tipin	1.5936	1	1.24764
Ccm2	2.71078	0.181313	0.458778	Fosl2	2.20157	0.732486	1.50501	Polr2h	4.54373	0.000227986	0.574603	A430005L14Rik	1.5919	1	1.23137
Xbp1	2.70802	0.182146	0.311345	Ddit4	2.19973	0.733021	0.607545	Psma6	4.51997	0.000252966	0.42939	Aqr	1.5838	1	1.50718
Son	2.70714	0.182289	0.128482	Mynn	2.1945	0.740854	0.493852	H2afj	4.51662	0.000256263	0.51003	Slu7	1.57928	1	1.21337
Gpsm3	2.70428	0.183521	0.279317	Mef2c	2.19155	0.745079	0.17003	Hdgf	4.51553	0.000256857	0.562373	Rab18	1.57401	1	0.858067
Cdc42se2	2.69939	0.185548	0.450533	Kpna1	2.18042	0.762439	0.724714	Gins2	4.50968	0.0002633	1.94156	Ddost	1.57364	1	0.793651
Ralbp1	2.68822	0.190111	0.18137	Zcrb1	2.17796	0.764254	0.227857	Cox7c	4.5063	0.000266775	0.241636	Mrpl35	1.57213	1	1.02661
Atraid	2.67801	0.194926	0.253619	Smim10l1	2.17606	0.764942	0.205843	Bcl2	4.49653	0.00027855	0.763866	Tbcb	1.5693	1	0.923733
Rpl36a	2.67695	0.195188	0.046942	Zfyve27	2.1704	0.768989	0.519402	Ostc	4.46597	0.000318763	0.523061	Il27	1.56629	1	3.20598
Fis1	2.67133	0.198124	0.21176	Fus	2.16278	0.776877	0.138309	Eef1b2	4.46146	0.000324639	0.150603	Gm12185	1.5661	1	3.28415
Faap20	2.66222	0.201731	0.28612	Gng5	2.15666	0.786558	0.06711	Ppat	4.44384	0.000350478	1.05821	Sec61a1	1.56083	1	1.18357
Ppp1r11	2.65609	0.203965	0.211312	Mllt3	2.15208	0.794256	0.157666	Nucks1	4.44082	0.00035348	0.531992	Ifih1	1.56027	1	1.54804
Tcp11l2	2.65527	0.204096	0.38731	Sh3bgrl	2.13629	0.819075	0.265546	Rps16	4.43777	0.000357549	0.0649809	Plxna4os1	1.55725	1	1.46332
Mecom	2.64752	0.207715	0.215091	Zfp608	2.11972	0.836049	0.293296	Gnb2l1	4.43526	0.00036075	0.129792	Aldh1a1	1.55612	1	1.44589
Oasl2	2.63061	0.216417	0.511361	Ccdc86	2.10893	0.845684	0.38337	Cox5b	4.42701	0.000373801	0.41273	Top1	1.55612	1	0.71601
Lrpap1	2.6249	0.219692	0.276801	Rnh1	2.10792	0.846382	0.202868	Dnajc9	4.42327	0.000379308	0.644078	Kmt2e	1.5516	1	0.673348
Ptpn18	2.61998	0.222495	0.11255	Sgms1	2.08487	0.882417	0.236464	Ndufab1	4.41742	0.000388665	0.465521	Rac2	1.55142	1	0.59537
Tmem234	2.6164	0.224056	0.151529	Ralgps2	2.08152	0.883317	0.409532	Gnb2	4.41273	0.000396109	0.379275	Vdac1	1.55142	1	0.70019
Thoc2	2.61224	0.226405	0.231349	Kdm5a	2.08115	0.883317	0.260249	Fkbp3	4.40372	0.000411825	0.364474	Zfp85	1.55085	1	3.13067
Irf1	2.60213	0.230219	0.503013	Ndel1	2.07577	0.889036	0.29553	Ddx21	4.38606	0.000443723	0.650805	Grn	1.54822	1	1.16687
Eif5	2.59921	0.231538	0.136701	Fam63a	2.06956	0.896175	0.527127	Pnn	4.38581	0.000443723	0.43103	Sash3	1.54765	1	1.27002
Stx16	2.59493	0.233568	0.266379	Trp53bp1	2.06713	0.899157	0.565148	Ngfrap1	4.38577	0.000443723	0.376518	Glyr1	1.54614	1	1.20369
Kazald1	2.59453	0.233568	0.616682	Ywhaz	2.04838	0.928986	0.163674	Fermt3	4.38424	0.000445657	0.503412	Snx17	1.54162	1	0.952668
Rbp1	2.59444	0.233568	0.128071	Gadd45b	2.04322	0.93772	1.06305	Ssb	4.38264	0.00044775	0.347811	Txndc9	1.54049	1	0.824654
B4galt4	2.57813	0.24322	0.450909	Cmc1	2.0411	0.940963	0.263419	Gpatch4	4.37628	0.000459788	0.690107	Purb	1.5388	1	1.14411
Lbp	2.573	0.246437	0.520762	Smap2	2.03557	0.95207	0.389572	Rnaseh2b	4.37243	0.000466744	1.14921	Bckdha	1.5356	1	1.18131
Chmp2a	2.57054	0.247773	0.181138	1200007C13Rik	2.03194	0.953499	3.2766	Atp5o	4.36302	0.000486008	0.415525	U2af1	1.53447	1	0.591739
Crebrf	2.54333	0.260519	0.426788	Vegfa	2.017	0.975886	2.78685	Ddx27	4.35961	0.000492361	0.609082	Pxmp4	1.53334	1	1.84246
Rpl9-ps6	2.53805	0.262663	0.158478	Nfe2l2	2.00753	0.98839	0.235307	Fkbp11	4.35819	0.000494262	1.10532	Rab6a	1.53334	1	1.08967
Cyth4	2.53544	0.262908	0.478478	Srp9	2.00557	0.991503	0.109747	Hnrnpr	4.3333	0.000551488	0.415737	Gm4070	1.53221	1	2.99297
Tigd2	2.52584	0.268888	0.264614	Slirp	1.99042	1	0.193155	Uqcrb	4.33282	0.000551488	0.287184	Ap2m1	1.53108	1	0.819788
Traip	2.52347	0.269585	0.530574	Brd2	1.98952	1	0.245958	Atp5g3	4.33242	0.000551488	0.446054	Mau2	1.5292	1	1.369
H2-Aa	2.52323	0.269585	0.499363	Srsf11	1.9823	1	0.156992	1810022K09Rik	4.32672	0.000564495	0.527202	Erbb2ip	1.52901	1	1.40894
Spint2	2.51078	0.277939	0.129741	Sdcbp	1.97917	1	0.0776867	Rnaseh2c	4.32407	0.000569853	0.556506	Fez2	1.52656	1	1.92772
Rpl27a	2.50789	0.279323	0.0398942	Capg	1.97803	1	0.167549	Hacd1	4.32254	0.000572332	1.0144	Eif3c	1.52505	1	0.612112
Samhd1	2.4942	0.286673	0.282185	Dph3	1.96195	1	0.256873	Nop16	4.32141	0.000573783	0.762182	Acbd4	1.52374	1	2.95619
Eva1b	2.48715	0.291037	0.271977	Orai1	1.94539	1	0.34783	Nifk	4.31938	0.000577615	0.633278	Abracl	1.52355	1	0.69641
Tnfaip8	2.48093	0.294781	0.139546	Glul	1.94148	1	0.151634	Hmgn5	4.31614	0.000584639	0.688847	Gpsm3	1.51865	1	0.836604
Bcl11a	2.47722	0.296009	0.149799	Arf6	1.93318	1	0.642866	Smc2	4.31087	0.00059722	0.857612	Caml	1.51507	1	1.31824
Ftl1	2.47142	0.300388	0.0609633	Coq5	1.93223	1	0.320412	Raly	4.30444	0.000613272	0.538808	Cops3	1.51338	1	1.09397
2310001H17Rik	2.46681	0.303817	0.265454	Rbm17	1.9311	1	0.227757	Hspa9	4.29823	0.000628552	0.450486	Ddx1	1.51225	1	1.12725
Usf1	2.46614	0.303914	0.597391	Zfp593	1.92685	1	0.430525	Park7	4.28282	0.000669068	0.256647	Gm26532	1.50698	1	2.03699
Tapbp	2.46498	0.30426	0.292602	Ctsl	1.92538	1	0.186624	Mdh2	4.28231	0.000669068	0.427	Xrcc6	1.50491	1	1.38295
Cpne3	2.46407	0.30426	0.312968	Cd1d1	1.91923	1	0.399158	Mrps17	4.28028	0.000673523	0.506833	Vdr	1.50472	1	1.83505
Rpl23	2.45748	0.308554	0.038399	Mccc1	1.91788	1	0.653497	Psma3	4.27261	0.00069537	0.3192	Hnrnph1	1.50396	1	0.840369
Upp1	2.45439	0.31067	0.544629	Spag6l	1.91733	1	4.0509	Atp5g2	4.26774	0.000708947	0.248659	Gipc1	1.50359	1	1.13354
Nudt16	2.44515	0.317766	0.403216	Slc25a36	1.91462	1	0.359257	Lsm3	4.25724	0.000740706	0.406495	Edem2	1.49794	1	0.980437
Cracr2b	2.4409	0.320555	0.729716	Zmat2	1.91398	1	0.184233	Ybx3	4.25618	0.000741037	0.929113	Rbm38	1.49662	1	0.782474
Tmbim4	2.43641	0.324073	0.151986	Nfat5	1.91219	1	0.260389	Bzw2	4.25044	0.000756546	0.61294	Npl	1.49398	1	1.35852
Pigp	2.43474	0.324315	0.17537	Fam134b	1.91195	1	0.212562	Ndufb8	4.2302	0.000821866	0.465925	Pglyrp2	1.49285	1	1.09839
Ormdl3	2.43003	0.327349	0.217391	Mvp	1.90998	1	0.359718	Hmgn2	4.22664	0.000832939	0.444749	H2-K1	1.49248	1	0.377293
Aplp2	2.42872	0.328036	0.221864	Ube2s	1.8948	1	0.210002	Timm13	4.22355	0.000840344	0.450764	Mrps5	1.49041	1	0.969392
Sec62	2.4259	0.329912	0.118526	Usp53	1.89175	1	0.741561	Glrx3	4.21719	0.000862295	0.451265	Scoc	1.48852	1	1.03054
Prdx5	2.42557	0.329912	0.108768	Akap8	1.87494	1	0.247575	Wdr76	4.21578	0.000865633	1.44414	Vmp1	1.48834	1	0.875122
A330017A19Rik	2.41791	0.335424	0.706831	Tmem5	1.86424	1	0.304232	Prim1	4.20109	0.000921503	1.40921	Mettl9	1.48419	1	1.1035
Sema4b	2.41652	0.336212	0.95068	Fam107b	1.86424	1	0.190091	Uchl3	4.19888	0.000928332	0.691044	Mier1	1.48174	1	0.805368
Pura	2.41011	0.340652	0.24914	Tnrc6a	1.85856	1	0.290768	Mrpl20	4.18976	0.000964127	0.538507	Tsen34	1.48156	1	0.870791
Ppp2r2a	2.40835	0.341629	0.230551	Ddit3	1.85736	1	0.399292	Wdr12	4.1883	0.000968001	0.568251	Zfp687	1.48099	1	1.7394
Ing4	2.39781	0.349199	0.271601	Atg2a	1.836	1	0.640398	Eif4e	4.17024	0.00104301	0.537133	Esco1	1.48061	1	1.35434
Hmgcl	2.39568	0.349717	0.375272	Emcn	1.82991	1	0.330451	Rpl8	4.16646	0.00105793	0.0774704	Oas3	1.4793	1	2.70262
Gimap4	2.38667	0.357339	1.03858	Wac	1.8265	1	0.299489	Uqcr10	4.15527	0.00110844	0.373843	Polr2m	1.4793	1	1.34596
Gtf2i	2.37974	0.36201	0.267304	Arf4	1.81949	1	0.14978	2700029M09Rik	4.15382	0.00111287	0.631086	Wdr43	1.47572	1	0.895288
Rpl17	2.37261	0.368012	0.0330704	Dtl	1.81759	1	0.412556	Rps27a	4.13786	0.00118472	0.0571255	Fahd2a	1.46762	1	1.33831
Crot	2.36762	0.37139	0.398418	Adipor1	1.8163	1	0.208208	Cct2	4.12842	0.00122869	0.423538	Gpr108	1.46668	1	1.27469
Psmd9	2.36465	0.373312	0.3476	Snrnp48	1.81202	1	0.291052	Ndufb7	4.11355	0.00130145	0.460687	Pde6d	1.46103	1	1.15794
Emb	2.3354	0.398106	0.323069	Insig1	1.81024	1	0.433972	Ola1	4.11116	0.001312	0.619604	Rpl11	1.46103	1	0.164341
Fam212a	2.32751	0.404097	0.171181	Hnrnpdl	1.80944	1	0.186529	Hmgb1	4.10814	0.00132618	0.291834	Pgap2	1.45971	1	1.29236
Foxp1	2.32714	0.404097	0.175012	Cfap36	1.80665	1	0.360535	Ddx46	4.10487	0.00134198	0.516137	Smc1a	1.45689	1	0.493577
Ifngr1	2.32611	0.404097	0.225657	Tacc1	1.80167	1	0.300223	Srgn	4.09331	0.00139768	0.187532	Dync1i2	1.45538	1	0.938982
Arpc5	2.32481	0.404502	0.103316	Ndrg3	1.79841	1	0.362805	Psmb5	4.09291	0.00139768	0.394669	Rps23	1.45312	1	0.112712
Fgfr1op2	2.32468	0.404502	0.179228	Clk4	1.79746	1	0.325202	Ppil1	4.09281	0.00139768	0.753495	Mob4	1.4518	1	0.964295
2610001J05Rik	2.32326	0.405475	0.182694	Ppp2ca	1.79534	1	0.402319	Nrm	4.08939	0.00141519	1.36903	Tonsl	1.44917	1	0.622749
Krt18	2.30929	0.418667	0.17777	Luc7l2	1.79119	1	0.154729	Dnajc2	4.06581	0.00155914	0.504576	Tmem70	1.44747	1	1.1258
Tnrc6b	2.30911	0.418667	0.199692	Med30	1.79005	1	0.346114	Rpl35	4.0557	0.00162441	0.165356	Azi2	1.4471	1	1.28134
Crebbp	2.30844	0.418827	0.253449	N4bp2l2	1.77815	1	0.166297	Pdcd4	4.05258	0.00163887	0.804888	2300009A05Rik	1.4454	1	1.25042
Mtf2	2.30598	0.419817	0.245358	Alkbh1	1.77474	1	0.234246	Mrpl36	4.04564	0.00168442	0.581139	Mettl7a1	1.44408	1	0.726444
Cr1l	2.29702	0.427958	0.190218	Proser1	1.77059	1	0.408469	Lsm2	4.04062	0.00171316	0.539911	Hspa4	1.43994	1	0.847289
Akt1s1	2.29663	0.427958	0.270601	Syf2	1.76481	1	0.150937	Eny2	4.03906	0.00172077	0.50846	Cep135	1.43731	1	2.57128
Ebi3	2.2948	0.428804	0.354436	Nkx2-3	1.76442	1	0.473559	Mrpl42	4.03463	0.00174969	0.465523	Aldh1l1	1.43542	1	2.51487
Trmt13	2.28991	0.431446	0.542454	Yes1	1.76156	1	0.970718	Ndufc2	4.03103	0.00177275	0.358773	Trim30d	1.43015	1	1.69771
Net1	2.28837	0.431447	0.639828	Tspyl2	1.76122	1	0.669123	Psmb2	4.02154	0.00183753	0.285213	Taf3	1.42827	1	1.0795
Nsa2	2.27907	0.44151	0.127641	Ilf2	1.76057	1	0.131609	Gmfg	4.0154	0.00188189	0.419679	Arf5	1.42808	1	0.758615
Stat1	2.27804	0.442109	0.374645	Ctsf	1.75768	1	0.338297	Rfc2	4.0113	0.00191072	0.584513	Nab1	1.42601	1	1.63115
Mpzl1	2.27594	0.443345	0.665457	Aplp2	1.75458	1	0.185484	Ubtf	4.01035	0.00191418	0.563216	Actr1b	1.42394	1	1.67923
Irf9	2.27364	0.444236	0.335419	Spata13	1.75458	1	0.645502	Timm9	4.00141	0.00198362	0.690129	Tsc22d1	1.42337	1	0.621329
Irf3	2.27221	0.445301	0.273937	Lmbrd1	1.75249	1	0.417112	Wdr43	3.99462	0.00203692	0.582777	Ipo11	1.42036	1	0.804953
Vwf	2.26923	0.446387	0.563741	Lmna	1.74917	1	1.58974	Aprt	3.99186	0.0020563	0.38424	Trim65	1.41942	1	2.47964
Cnrip1	2.26267	0.451688	0.417115	Spint2	1.74361	1	0.118209	Strap	3.98717	0.00208824	0.528577	Golt1b	1.41848	1	2.44427
Efna1	2.25876	0.453317	1.10782	S100a13	1.73654	1	0.140748	Parp1	3.94571	0.0024529	0.54257	Eif1ax	1.4164	1	0.673219
Prkcdbp	2.258	0.453356	0.24851	Lst1	1.73217	1	0.150693	Mpc2	3.93658	0.00254253	0.450733	Gbp9	1.41151	1	2.44
Amn1	2.25745	0.453356	0.46604	Samsn1	1.72839	1	0.163484	Cox6b2	3.93586	0.0025448	0.860557	Tmem147	1.41151	1	0.7674
Il16	2.2539	0.454889	0.332601	Mtf1	1.72461	1	0.617645	Uchl5	3.93277	0.00257225	0.648683	Stxbp3	1.40831	1	1.57569
Ube2b	2.24801	0.459504	0.135588	Rbm27	1.72145	1	0.198794	Fam98b	3.92732	0.00262565	0.688031	Fxr1	1.40718	1	0.900062
mt-Nd5	2.247	0.460102	0.140356	Gpr171	1.72031	1	0.223923	Nono	3.92586	0.00263596	0.380481	Ash2l	1.40511	1	1.08186
Map2k1	2.24391	0.463211	0.405759	Ddx3y	1.72006	1	0.547899	Lsm6	3.91841	0.002713	0.480163	Rbbp4	1.40435	1	0.657943
Dguok	2.24293	0.463778	0.111267	Ccdc112	1.71948	1	0.497472	Snx5	3.90686	0.00283404	0.556497	Rnpc3	1.4004	1	1.717
Wbscr27	2.23798	0.468477	0.45253	Dcaf8	1.71453	1	0.153302	Mrpl33	3.9053	0.00284516	0.401566	Ept1	1.4004	1	2.37748
Osbpl9	2.23634	0.46872	0.301066	Cmtm6	1.71444	1	0.328233	Anapc5	3.9049	0.00284516	0.465732	Nol6	1.39983	1	2.34667
Cst3	2.22869	0.477455	0.0739931	Ptp4a1	1.71398	1	0.694502	Timm10	3.90388	0.00285118	0.617286	Elf1	1.39757	1	0.732353
Rpl21	2.22723	0.477513	0.0378459	Tspyl1	1.71299	1	0.27558	Calm1	3.90192	0.00286839	0.244689	Nek1	1.39701	1	1.59397
Psap	2.22702	0.477513	0.13837	Rps12	1.71238	1	0.398119	Ptpn7	3.88822	0.00302257	0.708065	Fam213a	1.39701	1	0.777786
Il21r	2.22553	0.477768	0.247083	Per1	1.70986	1	0.844902	Hprt	3.88433	0.00305478	0.434566	Gorasp1	1.39682	1	2.3291
Fam26f	2.22453	0.477768	0.476036	Wbp11	1.70731	1	0.208675	Rpl12	3.88353	0.00305478	0.0901496	Jmjd6	1.39324	1	1.04015
Fam43a	2.22447	0.477768	0.423768	Fam174a	1.70513	1	0.223847	Mrps24	3.88342	0.00305478	0.426703	Supt6	1.39211	1	1.18715
Hist3h2a	2.21433	0.488242	0.382237	Use1	1.69738	1	0.0993921	Pin1	3.88313	0.00305478	0.570922	Mov10	1.39117	1	2.3357
Nsd1	2.21284	0.48844	0.172907	Ocrl	1.69646	1	0.290206	Actr3	3.88139	0.00307046	0.442355	Mrpl57	1.39117	1	0.844381
Dscr3	2.21229	0.48844	0.759614	Arid5a	1.69249	1	0.999906	Ndufb6	3.86998	0.00320462	0.488636	Spcs1	1.38891	1	0.503982
Bnip3l	2.21193	0.48844	0.103204	Man1a	1.69003	1	0.325405	Tomm40	3.86285	0.00329281	0.594815	Cdcp1	1.38646	1	2.33815
Tomm34	2.19529	0.504576	0.250438	Rora	1.68801	1	0.388069	Dtl	3.85849	0.00333848	0.933607	Plin2	1.38609	1	1.27778
Rchy1	2.19438	0.505119	0.182415	Foxn3	1.68788	1	0.221085	Rsl1d1	3.85675	0.00335557	0.418147	Rab5a	1.38609	1	2.29349
Nfkbia	2.19383	0.505194	0.144655	Ifitm1	1.68072	1	0.138622	Syncrip	3.85348	0.00339384	0.560654	Selenbp1	1.3859	1	0.837042
Tmx2	2.19274	0.505973	0.369209	Rps27	1.67673	1	0.134223	Ndufs5	3.84734	0.00347299	0.392461	Casp8	1.38571	1	0.892543
Capza2	2.18979	0.508516	0.124424	Pdlim1	1.67067	1	0.170006	Nudt5	3.84526	0.00349302	0.750662	Kat7	1.38307	1	1.54482
BC005624	2.18934	0.508516	0.227445	Ssh2	1.66695	1	0.509898	Pf4	3.84494	0.00349302	0.969932	Il18bp	1.38138	1	2.33136
Zfp207	2.17518	0.523175	0.210816	Mecom	1.66634	1	0.151759	Dpy30	3.84308	0.00350905	0.454526	Prmt5	1.38119	1	1.21543
H13	2.15815	0.541408	0.150301	Rpl10-ps3	1.6632	1	0.121149	G6pc3	3.84283	0.00350905	0.717871	Polr3b	1.37856	1	2.27361
Klhl24	2.15229	0.546527	0.380936	Srpr	1.66277	1	0.207503	Atad2	3.84138	0.00352284	1.13087	Cdc37	1.37667	1	0.567486
Polr2g	2.14958	0.548582	0.149443	Zbtb11	1.6624	1	0.461771	Cox7a2	3.84069	0.00352571	0.322421	Pex1	1.37084	1	2.34561
Rtcb	2.14901	0.548714	0.135344	Il2rg	1.66216	1	0.258638	Nudt21	3.83727	0.00356797	0.525239	Uso1	1.36952	1	1.51294
Fnta	2.14624	0.551197	0.16616	Shisa5	1.65918	1	0.116505	Mrpl17	3.83117	0.00365042	0.50586	Adssl1	1.36858	1	1.23463
Rnasel	2.14524	0.551475	0.314082	Setd7	1.65586	1	0.40595	Itga2b	3.82844	0.00368375	2.08178	Junb	1.36782	1	0.685313
Tsc22d4	2.14463	0.551475	0.140613	Srrm2	1.65324	1	0.0678622	Pdia6	3.82571	0.00370544	0.383663	Anapc16	1.36726	1	0.899401
Git2	2.13935	0.557429	0.159606	Bcl9	1.64968	1	0.608218	Casp8ap2	3.82553	0.00370544	0.741119	Polr2g	1.365	1	0.636607
Tspan3	2.13804	0.557916	0.115017	Fam114a2	1.64661	1	0.184681	Dbi	3.81409	0.00385861	0.324675	Ergic3	1.36311	1	0.704624
Cdc42ep3	2.1269	0.570901	0.221171	Stat4	1.6451	1	0.273921	Psma2	3.81063	0.00390163	0.335476	Slc4a1ap	1.36255	1	1.20259
Sdhd	2.11481	0.585499	0.213631	Stk4	1.63622	1	0.186094	Ssr2	3.79697	0.00409476	0.48832	Mrps12	1.35521	1	0.755091
Calm2	2.11135	0.589838	0.0702661	Dazap2	1.63376	1	0.178822	Sf3b6	3.79603	0.00410242	0.323968	Timm10b	1.35182	1	0.944736
Rest	2.10841	0.592052	0.229528	Gnas	1.63363	1	0.131589	Cox8a	3.78592	0.00425625	0.192425	Lst1	1.34862	1	0.492739
Rpl38	2.10765	0.59235	0.0384862	Tmem251	1.62875	1	0.478006	Nxt1	3.78251	0.00429851	0.633297	Rpl7a	1.34843	1	0.330822
Krit1	2.09902	0.600266	0.157954	Bloc1s2	1.6281	1	0.248901	Timm50	3.77128	0.00448399	0.783449	Hs2st1	1.3473	1	2.14888
Vbp1	2.09231	0.609542	0.187532	Ap2b1	1.6269	1	0.289849	Psmd6	3.77102	0.00448399	0.542236	1600014C10Rik	1.34617	1	2.26139
Dynlt1c	2.08199	0.623312	0.586632	Wfdc2	1.62558	1	0.262352	Rcl1	3.76616	0.00455486	0.647862	Psmg1	1.34579	1	1.09113
Gimap9	2.08177	0.623312	0.355174	Birc2	1.62398	1	0.359446	Vamp5	3.75736	0.00469103	0.323057	Hivep3	1.34428	1	1.50619
Dynlrb1	2.07892	0.626365	0.0989526	Fcho2	1.62036	1	0.276822	Thyn1	3.75467	0.00473061	0.623423	Prkx	1.34203	1	2.18784
Rnf146	2.0723	0.634225	0.306944	Tsg101	1.61793	1	0.203654	Eif3g	3.75144	0.00477609	0.429448	Eri1	1.33977	1	1.15526
Golgb1	2.0702	0.636738	0.159929	Nrros	1.61655	1	0.16841	Pgp	3.75006	0.00479342	1.12623	Cdk12	1.33845	1	0.677293
Itga4	2.06874	0.638078	0.297833	Ubxn6	1.60776	1	0.189849	Pmf1	3.74835	0.0048171	1.04849	Coa6	1.33826	1	1.05577
Psmb1	2.06789	0.638078	0.105624	Hist3h2ba	1.59592	1	0.656787	Mrps16	3.74588	0.00485564	0.412288	St3gal4	1.33581	1	1.45702
Rplp0	2.06231	0.641471	0.0284152	Gtf2h5	1.584	1	0.152944	Denr	3.74435	0.00487192	0.467763	Stard4	1.33525	1	0.914821
Rhof	2.05936	0.643578	0.334735	Rrad	1.58129	1	0.698248	Ndufa8	3.7441	0.00487192	0.359925	Pfdn5	1.3328	1	0.345722
Ifnar1	2.05833	0.643578	0.555699	Rock2	1.58006	1	0.214026	Lap3	3.74264	0.00489106	0.591462	Rps26-ps1	1.33261	1	0.874112
Gata3	2.0583	0.643578	0.463411	Trim26	1.56728	1	0.481001	Pold2	3.74094	0.00490524	0.794897	Stau2	1.33073	1	1.45795
Stap1	2.05232	0.648229	0.219169	Hectd1	1.56491	1	0.142144	Mybbp1a	3.73934	0.00490524	0.667436	Fuca1	1.33035	1	0.900746
Tonsl	2.05052	0.649933	0.141231	BC026585	1.55689	1	0.263831	Pomp	3.73923	0.00490524	0.288387	Fam110b	1.33035	1	1.44079
Dus2	2.04469	0.656212	0.539018	Smpdl3a	1.55643	1	0.131004	Ppp1ca	3.73912	0.00490524	0.326223	Rpl12	1.32903	1	0.188781
Hmg20b	2.04239	0.657675	0.196814	Yipf3	1.5551	1	0.220833	Eftud2	3.73759	0.00492601	0.84793	Eif3m	1.32866	1	0.606452
H2-Eb1	2.04169	0.658053	0.686417	Nabp1	1.55474	1	0.511983	Gspt1	3.73258	0.00501592	0.739729	Sin3b	1.32225	1	0.673596
Tmem140	2.04087	0.658623	0.661464	Gm10263	1.55218	1	0.1505	Polr2e	3.72596	0.00513044	0.384184	Dnpep	1.32131	1	1.08177
Art4	2.03537	0.662985	0.399867	Pou2f2	1.55022	1	0.239019	Pycrl	3.72306	0.00517096	0.732778	Zmiz1	1.31849	1	1.22675
Mfng	2.034	0.664435	0.177246	Acad9	1.54714	1	0.445062	Nip7	3.71852	0.00524567	0.585334	Pknox1	1.31792	1	2.05793
Bub3	2.02957	0.670021	0.151814	Pik3ip1	1.54653	1	0.109272	Ppid	3.70561	0.00549009	0.472413	Spty2d1	1.31755	1	1.09004
Plxna4os1	2.02754	0.671875	0.430978	Hey1	1.54324	1	5.32673	Rad50	3.70205	0.00555769	0.463132	Ccdc112	1.31679	1	1.3848
Sec11a	2.02641	0.67295	0.112169	Rab10os	1.54275	1	0.325383	Vdac1	3.69551	0.00567286	0.444157	Men1	1.3166	1	1.41244
Gbp7	2.02432	0.67486	0.225174	Pdzk1ip1	1.54263	1	0.100783	Noc2l	3.69548	0.00567286	0.943279	H2-Q7	1.31529	1	0.561904
Napg	2.01897	0.680573	0.500475	Jmjd6	1.53992	1	0.308607	Vamp8	3.69213	0.00573767	0.266611	Zkscan1	1.31208	1	1.17591
Hcfc1r1	2.01587	0.684883	0.226115	Baz2b	1.53931	1	0.16364	Bzw1	3.68501	0.00588997	0.403368	Tpst2	1.31208	1	0.738193
Snx29	2.01457	0.685532	0.691276	Dpy19l3	1.53915	1	0.486813	Adh5	3.68174	0.0059554	0.449319	Ncf2	1.31077	1	1.0174
Hsd17b11	2.01275	0.687029	0.431975	Pfdn5	1.53854	1	0.0412119	Lsm5	3.67778	0.00603784	0.443596	Ifit1bl1	1.30964	1	6.00406
Ngrn	2.00895	0.69103	0.302041	Ndufa12	1.53755	1	0.0983287	Arid1b	3.67618	0.00605467	0.682646	Vps26a	1.30964	1	1.21172
Sqrdl	2.00658	0.694189	0.590923	Eif4a1	1.53568	1	0.0758705	Cox6a1	3.676	0.00605467	0.325827	Arfip1	1.30888	1	2.11262
Pon2	2.0044	0.696309	0.310211	Atp2b4	1.5287	1	0.174883	Mrps25	3.67571	0.00605467	0.612702	Supt7l	1.30832	1	2.12458
Oard1	2.00121	0.697906	0.249902	Ccrl2	1.52588	1	0.620361	Mrpl54	3.67207	0.00613057	0.467677	Ifit3b	1.30399	1	5.42934
Obscn	1.99951	0.699931	0.404326	Pign	1.52588	1	0.462163	Lars	3.67077	0.00615115	0.696831	Rpl22l1	1.3038	1	0.166284
Smim20	1.99717	0.702324	0.232893	Rusc1	1.52578	1	0.620681	Cct7	3.6671	0.00622908	0.328683	Ahctf1	1.30116	1	1.16709
Pqlc1	1.99541	0.704118	0.345291	Casp4	1.51613	1	0.331713	Mphosph10	3.66306	0.00629472	0.543452	Cdc73	1.30003	1	2.08745
Ms4a6b	1.99352	0.704118	0.500466	St8sia4	1.51589	1	0.351096	Tomm20	3.65343	0.00652424	0.243337	Ufc1	1.29721	1	0.729365
Rpl34	1.99097	0.707429	0.038142	Rbm38	1.50952	1	0.131806	Snrnp70	3.65143	0.00652949	0.434796	Secisbp2	1.29683	1	1.10516
Plxdc2	1.98982	0.707866	0.337491	Ddx50	1.5075	1	0.219407	Galk1	3.64042	0.00676809	0.635072	Pf4	1.29533	1	1.05859
Flot1	1.98718	0.710901	0.186111	Hspa8	1.50611	1	0.0471109	Ndufa12	3.63915	0.00678988	0.33616	Serpina3g	1.29457	1	0.919531
Maea	1.98566	0.712602	0.316287	Gm9843	1.50439	1	0.0789478	Dek	3.62022	0.00728147	0.370972	Dnaja1	1.29382	1	0.465883
Sugt1	1.98168	0.717487	0.167399	Klf13	1.50384	1	0.442653	Mthfd1	3.61927	0.00729557	1.08071	1110038F14Rik	1.29363	1	0.887063
Eepd1	1.97904	0.719273	0.487098	Hjurp	1.50353	1	0.221558	Gtpbp4	3.61677	0.00735396	0.486147	Rnh1	1.29005	1	0.655509
Stxbp4	1.97649	0.722849	0.361373	Kctd10	1.50261	1	0.298106	Rfc5	3.61048	0.00752166	0.868888	Pdlim2	1.29005	1	1.18929
Naa38	1.97485	0.724886	0.197558	Sepp1	1.50242	1	0.136975	Usmg5	3.60935	0.0075415	0.441215	Taf12	1.28874	1	1.17068
Ifitm2	1.97014	0.729455	0.0756904	Leng9	1.50224	1	0.505517	2310039H08Rik	3.60888	0.00754238	0.569771	Smim4	1.28553	1	0.939829
Ccnd2	1.96996	0.729455	0.0992299	Ing2	1.49889	1	0.757127	Muc13	3.60605	0.0075993	0.901251	C1rl	1.28478	1	1.4973
Rpl3	1.96653	0.73231	0.0312165	Ppp1r9a	1.4972	1	0.22154	Calm3	3.59885	0.00779941	0.411513	Igbp1	1.28309	1	0.729663
Rsbn1	1.96522	0.733039	0.204122	Pstpip1	1.49535	1	0.293015	Ppan	3.59682	0.00784735	0.558046	Eya2	1.28215	1	1.37126
Zbtb20	1.96395	0.734113	0.110501	Fbxo9	1.49148	1	0.164612	Hat1	3.59137	0.00799981	0.642967	Tnfrsf1a	1.28026	1	1.01522
Smim14	1.96328	0.734113	0.0967768	Etv6	1.49093	1	0.194212	Oser1	3.59042	0.00801533	0.664523	Ate1	1.27894	1	0.878054
Dapp1	1.96149	0.735998	0.102809	Tnfrsf1a	1.48991	1	0.231428	Nans	3.5753	0.0084645	0.801066	Rsrc1	1.278	1	0.968644
Atp5sl	1.9613	0.735998	0.450497	Nr1h2	1.48964	1	0.247874	Plac8	3.57054	0.00856228	1.10676	Kazald1	1.27781	1	1.30891
Srpk2	1.95851	0.740062	0.232693	Emc2	1.48604	1	0.168784	Rangap1	3.56807	0.00862901	0.844246	Gm17541	1.27687	1	1.32936
Hrsp12	1.95383	0.744769	0.233126	Eya1	1.48503	1	0.48495	Timeless	3.55699	0.00895646	2.42085	Med25	1.27461	1	1.36089
Cln3	1.95259	0.744769	0.471812	Lncpint	1.48079	1	0.497327	Tcp1	3.5543	0.00903356	0.384596	Med30	1.27442	1	1.08511
Mob2	1.95001	0.747232	0.29286	Ddx6	1.48048	1	0.161086	Pbdc1	3.54194	0.00943618	0.535575	Nr4a1	1.27273	1	0.736312
Bet1l	1.94831	0.747611	0.312786	Slc7a11	1.47903	1	2.3529	Snrpe	3.54071	0.00946485	0.258127	Raly	1.27273	1	0.690799
Ctsh	1.94035	0.758047	0.336593	Maoa	1.47003	1	0.815492	Tmed2	3.5358	0.0096265	0.482243	Kdsr	1.27122	1	1.34299
BC017643	1.93765	0.758856	0.40037	Ncoa2	1.46493	1	0.288367	Dad1	3.5329	0.00971699	0.306248	Ecd	1.26878	1	1.36196
Tbl1x	1.93722	0.758856	0.233825	Mnt	1.46204	1	0.449449	Umps	3.52901	0.00984472	0.801843	Pde4b	1.26859	1	0.8975
1700123O20Rik	1.93686	0.758856	0.223034	Grhpr	1.45023	1	0.347294	Shmt1	3.52646	0.00992351	1.60323	Cul5	1.26708	1	1.00247
Nck1	1.93643	0.758856	0.364421	Sde2	1.44996	1	0.166261	Psma1	3.52138	0.0100829	0.31118	Golph3l	1.2667	1	1.36127
Dalrd3	1.93139	0.764005	0.376547	Gucy1a3	1.44879	1	0.223768	Atp5h	3.51767	0.0102027	0.299825	Ctbp2	1.26143	1	1.36025
Klhl6	1.92963	0.766307	0.283564	Syap1	1.44735	1	0.287615	Nmral1	3.514	0.0103166	1.15226	Cox6b1	1.26087	1	0.528263
Snap23	1.92893	0.766784	0.182424	Dhrs11	1.44436	1	0.67972	Psma4	3.51287	0.0103436	0.307069	Psmb10	1.25993	1	0.763431
Arhgef1	1.918	0.780877	0.276118	Mrpl23	1.43668	1	0.0951283	Cox6b1	3.50891	0.0104678	0.255006	Snrpb2	1.25955	1	0.742918
Hist1h2be	1.91718	0.780877	1.5295	Scoc	1.42995	1	0.213883	Gsto1	3.50419	0.0106181	0.376615	Med1	1.25767	1	1.01866
Mtdh	1.90956	0.787813	0.0900755	Stx5a	1.42976	1	0.186812	Ahsa1	3.49848	0.0108304	0.359611	Tuba1c	1.25748	1	1.8963
Trpc4ap	1.90789	0.788422	0.247239	Eya2	1.42878	1	0.347921	Fen1	3.49336	0.0110227	1.10698	Fkbp9	1.25315	1	1.40209
Arl1	1.90789	0.788422	0.159584	2610002M06Rik	1.42866	1	0.361982	Atp5d	3.49245	0.0110425	0.276722	Bclaf1	1.25183	1	0.501526
Sri	1.90488	0.790799	0.106619	Atxn7l3b	1.42515	1	0.0859119	Ppif	3.47377	0.0118027	0.618625	Exoc7	1.25051	1	1.31482
Hoxb2	1.89893	0.798387	0.471421	Rnf41	1.42322	1	0.5174	Rpn1	3.47319	0.0118094	0.585359	Ints2	1.24995	1	1.85421
Ninj1	1.89859	0.798387	0.104187	Mrps21	1.42226	1	0.149378	Eif3b	3.47094	0.0118711	0.529868	Mydgf	1.249	1	0.733891
Atp6v1g1	1.89383	0.804024	0.106265	Rab8b	1.4222	1	0.359649	Atp5k	3.46621	0.0120624	0.535756	Ccdc191	1.24806	1	1.24185
Tmem237	1.89097	0.807721	0.456248	Sirt3	1.41876	1	0.138563	Coro1a	3.46251	0.0122104	0.255747	Adar	1.24769	1	1.86904
Mob3c	1.88964	0.808634	0.481135	Snrnp35	1.41298	1	0.813422	Lamtor4	3.46149	0.0122373	0.457899	Il12a	1.24524	1	1.90789
Coro1b	1.88891	0.809203	0.26484	Kdelr1	1.41203	1	0.145519	Rpa2	3.45847	0.0123556	0.722603	Nr1h2	1.24486	1	1.21439
Sord	1.88815	0.809505	0.195744	Tpm3	1.41034	1	0.088856	Bax	3.45273	0.0125818	0.4458	Memo1	1.24467	1	1.82366
Unc45b	1.88493	0.81345	0.61874	Zmynd11	1.41034	1	0.201949	Sec61g	3.45088	0.0126486	0.305874	Cyb5b	1.2443	1	1.24053
Il2rg	1.88311	0.815273	0.320852	Bclaf1	1.40465	1	0.118636	R3hdm1	3.44728	0.0127981	0.448815	Pnck	1.24241	1	1.87622
Rtf1	1.87925	0.820103	0.0980289	Itih5	1.40223	1	0.175298	Magoh	3.44419	0.0129047	0.411746	Klhl9	1.23997	1	1.29076
Ndufs3	1.87837	0.820965	0.132976	Dnajb6	1.40084	1	0.130947	Pgam1	3.43791	0.0131874	0.450971	Ascc3	1.23865	1	1.13207
Rps21	1.87706	0.821843	0.0528608	Hnrnpul2	1.39811	1	0.24586	Actl6a	3.43071	0.013479	0.485312	Coq5	1.23601	1	0.935806
Mttp	1.87551	0.822402	0.983757	Gm973	1.39666	1	0.424611	Krtcap2	3.42544	0.0136958	0.255913	Tubb4b	1.23563	1	0.463709
Abhd14b	1.87457	0.823382	0.426074	Paics	1.39371	1	0.160246	Slc22a3	3.42195	0.0138347	2.33515	Relb	1.23545	1	1.78898
Rrnad1	1.87202	0.827368	0.493209	Slc4a1ap	1.38882	1	0.27259	Ifrd2	3.41578	0.0141305	0.767255	Cyfip1	1.23243	1	1.07702
Mysm1	1.87105	0.828409	0.272397	Ube2l6	1.38689	1	0.133883	Btf3	3.41007	0.0144072	0.114372	Ccrl2	1.22942	1	1.87517
Spn	1.86701	0.835214	0.191603	Ralgapa2	1.38689	1	0.629919	Ndufb10	3.40782	0.0145043	0.309462	Tor3a	1.2281	1	1.38772
Leprot	1.8651	0.83804	0.259133	Tmem168	1.38667	1	0.431925	Aimp2	3.40273	0.0147544	0.66085	Hadh	1.22791	1	0.665646
Pqlc3	1.86434	0.83869	0.648819	Pim3	1.38471	1	0.539024	Lsm4	3.40186	0.0147788	0.349088	Nenf	1.22603	1	0.894017
B4galt6	1.85155	0.853563	0.571345	Rassf4	1.38249	1	0.626913	Cuta	3.40048	0.0147994	0.470286	H2-Ab1	1.22528	1	1.64182
Tcf4	1.84469	0.862792	0.156513	Gpi1	1.38108	1	0.0726804	Uhrf1	3.40022	0.0147994	2.68186	Ncoa6	1.2249	1	1.76483
Esam	1.84056	0.868392	0.180202	Iws1	1.38003	1	0.198711	Mrpl21	3.39674	0.0149497	0.471355	Gbp8	1.22452	1	2.12484
Gaa	1.8385	0.871604	0.32997	Eprs	1.37997	1	0.116296	Sf3b3	3.39663	0.0149497	0.747299	Trp53	1.22452	1	0.578099
Cirbp	1.83555	0.875323	0.125777	Ppp1r2	1.37819	1	0.204139	Impdh2	3.39528	0.0149769	0.282258	Ndufb2	1.22434	1	0.748513
Ndrg2	1.83494	0.875323	0.564459	Ptpn1	1.37776	1	0.178051	Akr1b3	3.39488	0.0149769	0.395489	Pum3	1.22415	1	0.844301
Ablim1	1.83403	0.8763	0.583219	Rad23a	1.37764	1	0.240795	Tmem123	3.39114	0.0151599	0.758882	Rtkn	1.22019	1	1.77733
Tor1a	1.82914	0.883645	0.290354	Dst	1.37616	1	0.270999	Rcc2	3.38234	0.0156301	0.479289	Mrpl30	1.21888	1	0.549582
Wls	1.82863	0.883645	0.194359	Dusp5	1.37069	1	1.69057	Srrm1	3.37195	0.0161831	0.34917	Parp11	1.21869	1	1.77644
Golga1	1.82835	0.883645	0.413076	Zfand2b	1.3698	1	0.291442	Eif5b	3.37195	0.0161831	0.40387	Rps27	1.21775	1	0.709258
Hp1bp3	1.82823	0.883645	0.111477	Trap1	1.3659	1	0.232451	Ccnd1	3.36763	0.0164143	0.680105	Cenpq	1.21699	1	1.30002
Atp6v1e1	1.82295	0.891971	0.160416	Ppm1g	1.36359	1	0.149009	Polr3h	3.35542	0.0171305	0.710839	Emc7	1.21454	1	0.814075
Pbxip1	1.81687	0.899635	0.311668	Runx2	1.36205	1	0.342438	Ramp1	3.35389	0.017176	0.361049	Pla2g4a	1.21436	1	0.99775
Igf1r	1.81472	0.903043	0.223824	Hnrnph1	1.35935	1	0.123441	Pdap1	3.35222	0.0172519	0.473996	Casp4	1.21285	1	1.4505
Mtfr1l	1.81369	0.903043	0.168352	Zfp281	1.35886	1	0.388591	Vdac3	3.34782	0.0175018	0.463298	Mfap3	1.2121	1	1.24815
Tapbpl	1.8111	0.906817	0.409921	Tmem243	1.35621	1	0.336565	Sae1	3.3439	0.0177248	0.496378	2610001J05Rik	1.21078	1	0.543117
Gm9843	1.81083	0.906817	0.0673969	Usp16	1.35618	1	0.357077	Smim5	3.34175	0.0178357	0.817024	Fam63b	1.20908	1	1.27223
Inhba	1.80989	0.907074	1.04693	Ccnc	1.35093	1	0.520942	Usp1	3.33056	0.0184875	1.22887	Rpl27-ps3	1.20475	1	0.761238
Myl12b	1.80779	0.908628	0.09699	Srpk2	1.34954	1	0.15107	Ddx39b	3.33049	0.0184875	0.374252	Sdf2	1.20419	1	0.694396
Kif3a	1.80093	0.917744	0.389207	Crbn	1.34819	1	0.316019	Uqcr11	3.33013	0.0184875	0.310936	Gm14698	1.20287	1	1.33179
Rpl36	1.79461	0.928393	0.0399413	Fxr1	1.34662	1	0.147395	Ewsr1	3.32845	0.0185714	0.410869	Cdc37l1	1.20268	1	0.990048
Syt11	1.79404	0.928436	0.948015	Vps13b	1.34512	1	0.631093	Ankrd10	3.32464	0.0187516	0.482962	Rock1	1.20268	1	0.858266
Tns2	1.79185	0.932069	0.881512	Wbp5	1.3442	1	0.0972725	Ube2n	3.31395	0.0194468	0.462389	Ndrg1	1.20118	1	1.69424
Tmem63b	1.78918	0.935055	1.02799	Ldha	1.34389	1	0.120118	Serpinb1a	3.31181	0.0195677	1.21718	Rnasel	1.19873	1	0.823353
Jam3	1.78748	0.937712	0.349587	Pnpla8	1.34269	1	0.282984	Tram1	3.31043	0.0196357	0.451543	Rfc2	1.19835	1	0.662937
Sptssa	1.78417	0.941885	0.090111	Arid5b	1.34266	1	0.454107	Rad23b	3.30476	0.0199787	0.536804	Rbpms	1.19703	1	1.23058
H2-Ab1	1.78383	0.941885	0.490044	Nmd3	1.34192	1	0.278035	Rps25	3.30345	0.0200137	0.0594922	0610030E20Rik	1.19647	1	0.927874
Mndal	1.78229	0.944244	0.115082	0610012G03Rik	1.3331	1	0.136991	Rpl29	3.29426	0.0205603	0.142439	Ttc4	1.19628	1	0.979007
Pdlim2	1.77718	0.952629	0.340278	Phldb3	1.32686	1	0.544656	Pop5	3.29226	0.020677	0.482666	Gbp6-1	1.19327	1	3.51509
Atf7ip	1.77661	0.952629	0.226807	Ndufa3	1.32628	1	0.135696	Rpl22	3.28274	0.0213265	0.0936691	Mrps10	1.19138	1	0.817185
Rps18	1.77582	0.952629	0.0271597	Hif1an	1.32228	1	0.440469	Mrpl3	3.28023	0.021486	0.636551	Rad54l2	1.18912	1	1.70055
Spsb2	1.77308	0.955868	0.603246	Mfap1a	1.32213	1	0.332154	Nkg7	3.27947	0.021499	2.54768	Gm13546	1.18875	1	3.25747
Swap70	1.77305	0.955868	0.420538	Dhrs7	1.31727	1	0.342018	Tmem256	3.27925	0.021499	0.358107	Mbnl2	1.18837	1	0.766486
2610035D17Rik	1.76592	0.96742	0.350266	Rbm42	1.3126	1	0.173624	Sept11	3.27871	0.0215097	1.08267	Irak3	1.18762	1	0.996424
Il11ra1	1.76261	0.972693	0.14314	Abhd16a	1.31091	1	0.226962	Nup62	3.27336	0.0218891	0.80514	H2-D1	1.18724	1	0.225239
Nudcd3	1.76033	0.974505	0.209737	Plcb2	1.31017	1	0.164517	Rif1	3.27166	0.0219589	0.617257	Cnot8	1.18724	1	1.25702
Stk38	1.76015	0.974505	0.363348	Gramd1a	1.30817	1	0.317503	Top2a	3.26628	0.0223166	1.52228	Fam175a	1.18536	1	1.67315
5031425E22Rik	1.75823	0.976336	0.258386	Cdk5rap3	1.30716	1	0.220226	Tyms	3.26094	0.0226768	1.06684	Cep170	1.18517	1	1.69618
Ubxn1	1.7582	0.976336	0.0746975	Abt1	1.30479	1	0.284099	Plekhj1	3.26028	0.0226969	0.413555	Trim56	1.18404	1	1.20614
Maged2	1.75429	0.982678	0.278478	Procr	1.30366	1	0.104331	Mrto4	3.25778	0.0228337	0.701702	Smc3	1.18291	1	0.550081
Rps8	1.75371	0.982779	0.029628	Acin1	1.30206	1	0.0965699	Ndufb5	3.24622	0.0237477	0.326453	2210013O21Rik	1.1814	1	0.702964
Zfp706	1.75301	0.982779	0.0723929	Slc35e2	1.30055	1	1.11211	Ppm1g	3.24535	0.023787	0.460823	Nudt16l1	1.18084	1	0.672802
Ift52	1.74724	0.993436	0.318818	Szrd1	1.29938	1	0.347922	Mrps28	3.24299	0.0239513	0.615892	Khk	1.17764	1	0.613649
Smim24	1.74618	0.994858	0.406239	Kpna4	1.29818	1	0.394438	1810037I17Rik	3.24055	0.0241198	0.315976	Znhit3	1.17594	1	1.21186
Trim47	1.74281	0.998674	0.295259	Fam175b	1.29689	1	0.286053	Tbcb	3.23623	0.0243886	0.491329	Atg12	1.17387	1	1.17326
Ext2	1.74232	0.998731	0.250906	Ttc1	1.29566	1	0.168573	Tuba4a	3.22442	0.0253463	0.408649	Med13	1.17312	1	1.67788
Gypc	1.74117	0.999639	0.303533	Gps2	1.2948	1	0.208286	Cpsf2	3.21995	0.0256732	0.580881	Inip	1.16898	1	1.637
Inpp5d	1.74044	1	0.384724	Zfpl1	1.29471	1	0.260211	Smc6	3.21453	0.0261129	0.441667	Ogfrl1	1.16653	1	1.691
Jak1	1.73895	1	0.0909882	Eva1b	1.29314	1	0.158334	Baz1b	3.21428	0.0261129	0.579741	Rab7	1.16615	1	0.513676
Tpd52	1.73825	1	0.217113	Cbfa2t3	1.29311	1	0.10928	Ddx1	3.20923	0.0265392	0.619929	Dnajb11	1.16483	1	0.890038
Was	1.73652	1	0.161889	9330020H09Rik	1.29278	1	0.823619	Smarca5	3.20828	0.0265898	0.524352	Pdhx	1.16446	1	1.64909
Nrip1	1.73597	1	0.183614	Zbtb37	1.29038	1	0.672291	Rpl7l1	3.20229	0.027112	0.401776	Calm1	1.16446	1	0.311498
Fth1	1.73497	1	0.0151974	Relb	1.28906	1	0.552816	Nudcd2	3.20101	0.0271944	0.58065	Cct4	1.16088	1	0.493951
Fgd5	1.73318	1	0.601594	Prkd2	1.28737	1	0.276182	Prps1	3.19542	0.0276511	0.647058	Sgpl1	1.15749	1	3.04947
Ash1l	1.73306	1	0.0988645	Cirh1a	1.28672	1	0.335347	Chchd4	3.18695	0.0283434	0.536562	Pctp	1.15598	1	1.62656
Slc9a3r1	1.73127	1	0.217675	Hoxa10	1.28654	1	0.294838	Sf3a3	3.18666	0.0283434	0.46337	Gfod2	1.15579	1	2.99924
Mfge8	1.7265	1	0.378617	Tex264	1.28558	1	0.244906	Slc25a3	3.18597	0.0283434	0.217499	Derl1	1.1541	1	0.923479
Mrpl24	1.72495	1	0.107894	Rnf113a2	1.28475	1	0.234227	Caprin1	3.18081	0.028789	0.42831	Psph	1.15391	1	0.961537
Tspan13	1.72246	1	0.0880508	Hoxb4	1.27888	1	0.318366	Dazap1	3.18059	0.028789	0.482977	Cxxc5	1.15335	1	0.628377
Spr	1.72164	1	0.177203	Mapk6	1.27845	1	0.63592	Arhgap30	3.17736	0.0290725	0.767005	Nt5c2	1.15259	1	1.2431
Setd1b	1.71703	1	0.402543	Rbm7	1.2747	1	0.143816	Smarcb1	3.17445	0.0292931	0.484775	Rpia	1.15109	1	0.82184
Rps20	1.71696	1	0.0222165	Exoc6	1.27083	1	0.4264	Erp29	3.17358	0.0293341	0.412679	Szt2	1.14807	1	2.92203
Hpcal1	1.71493	1	0.297242	Arid4b	1.27071	1	0.109988	Utp18	3.17212	0.0294386	0.589933	Ppp1r2	1.14506	1	0.861124
Saraf	1.71454	1	0.0824943	Hnrnpc	1.26942	1	0.0836287	Atic	3.17176	0.0294386	0.461279	Spryd4	1.1445	1	1.6082
Thoc3	1.71286	1	0.216223	Ltb	1.2676	1	0.10473	Psmd8	3.17118	0.0294578	0.369794	Dock9	1.14431	1	2.91815
Unc13d	1.7128	1	0.307518	Svil	1.26173	1	0.301223	Abce1	3.16584	0.0299638	0.646033	1110004E09Rik	1.14243	1	1.07904
Agtrap	1.70773	1	0.313516	Tmem203	1.26072	1	0.375336	Sec11c	3.16457	0.0300546	0.375211	Cdpf1	1.14167	1	1.17846
Pcmtd1	1.70719	1	0.203328	Faim	1.2602	1	0.245621	Rfc4	3.16373	0.0301006	0.845039	Dnajc13	1.14111	1	1.69596
Srp54b	1.70518	1	0.146925	Arl13b	1.25777	1	0.366257	Rps8	3.16268	0.0301261	0.0467984	Luzp1	1.14092	1	1.16557
Wfdc2	1.70375	1	0.323168	Myct1	1.25678	1	0.0847978	Ipo5	3.16242	0.0301261	0.831787	Psat1	1.13979	1	1.54874
Rnpc3	1.70251	1	0.468237	Slc7a1	1.25343	1	0.572161	Cbx1	3.16057	0.0302666	0.328577	Cenpa	1.13904	1	1.14119
Car2	1.70142	1	0.089681	Mdm2	1.2523	1	0.274563	Fignl1	3.15672	0.0306284	2.76789	Mdh1	1.1364	1	0.312955
H2-DMb1	1.69871	1	0.310545	Snrk	1.24999	1	0.385655	Mrpl13	3.15414	0.0308183	0.510374	A230046K03Rik	1.13376	1	1.15057
Paqr7	1.69604	1	0.3759	Ccdc25	1.24975	1	0.525076	Tcerg1	3.15276	0.0309233	0.57303	Nsfl1c	1.13339	1	0.653485
Enpp4	1.69425	1	0.809636	Tob2	1.24879	1	0.270789	Ltv1	3.14156	0.0320874	0.725306	Slfn9	1.13	1	2.9145
Tmed3	1.69364	1	0.124555	Gnl2	1.24427	1	0.179929	Prpf40a	3.13415	0.0327788	0.379657	Hsd17b4	1.13	1	1.06416
AI413582	1.6924	1	0.349253	Kdm5b	1.24424	1	0.144023	Smc3	3.12736	0.0334137	0.341933	Elavl1	1.12924	1	1.23082
Sys1	1.69033	1	0.119274	Cpq	1.24139	1	0.122916	Lrmp	3.12274	0.0338974	0.533508	Itga4	1.12491	1	0.816321
Calcrl	1.6886	1	0.509015	Vps72	1.24092	1	0.168898	Snrnp40	3.12125	0.0340247	0.433888	Timm21	1.12378	1	0.906807
Arl10	1.68696	1	0.56448	Eci2	1.24062	1	0.124181	Cyc1	3.11653	0.0345293	0.41683	Phf11d	1.12247	1	3.03291
Caml	1.68371	1	0.355494	Adgrl4	1.23942	1	0.129836	Comtd1	3.113	0.0348959	0.763963	Gbp4	1.12209	1	3.07281
Blvrb	1.6832	1	0.162371	Smarca2	1.23847	1	0.101125	S100a1	3.11264	0.0348959	0.446936	Zfr2	1.12171	1	2.74385
Erlec1	1.68031	1	0.254838	Tcf7l2	1.23773	1	0.368595	Ndufa1	3.11086	0.0350612	0.46492	Mir142hg	1.12171	1	2.73381
St3gal1	1.68013	1	0.238081	Slc25a17	1.23727	1	0.307011	Hnrnpdl	3.10784	0.0353748	0.415165	Zcchc3	1.12039	1	1.53336
Tmem86a	1.6767	1	1.0505	Gapdh	1.23183	1	0.102269	Mrpl28	3.10704	0.0354244	0.423749	Samsn1	1.1155	1	0.6108
Pgrmc1	1.67524	1	0.139107	Stxbp2	1.2313	1	0.161498	Ydjc	3.1037	0.0357341	0.743175	Timm17a	1.1138	1	0.609736
Rb1cc1	1.67299	1	0.214196	St3gal6	1.23121	1	0.454272	Serf1	3.10294	0.0357799	0.605901	Serpina3f	1.11267	1	2.80386
Glipr2	1.67084	1	0.302835	Cdipt	1.22359	1	0.256483	Cd3eap	3.10185	0.035819	0.583832	Mtmr12	1.11154	1	2.65039
Tarbp2	1.66862	1	0.447631	Dusp11	1.22239	1	0.142561	Hn1	3.08124	0.0380974	0.443952	Lcp2	1.11136	1	0.893964
Zfp422	1.66813	1	0.129724	Rplp2	1.22036	1	0.0202833	Smdt1	3.08022	0.0381788	0.324898	Rpl23a	1.11117	1	0.407449
Snx2	1.66783	1	0.226998	Fam220a	1.21953	1	0.233353	Sdhd	3.07343	0.0389592	0.452663	Zfp319	1.11041	1	2.67553
Xiap	1.66513	1	0.298213	Dph5	1.21889	1	0.173082	Exosc8	3.06612	0.0398219	0.518082	Smchd1	1.11004	1	0.531709
Ppp1cb	1.66473	1	0.197108	Epc2	1.2168	1	0.257577	Eef1e1	3.05969	0.0406352	0.508236	Helz2	1.10853	1	2.67321
Tspan4	1.66452	1	0.0853618	Siah2	1.21578	1	1.58373	Hspa5	3.05021	0.0417811	0.28297	Hacd4	1.10815	1	0.467089
Gm16141	1.66242	1	0.435073	Kiz	1.21428	1	0.275033	Hmbs	3.04323	0.0426848	0.862944	Rfx7	1.10589	1	1.09233
Lgals1	1.65744	1	0.249992	Hbp1	1.21117	1	0.228325	Imp4	3.04301	0.0426848	0.504173	St13	1.10476	1	0.483429
Ech1	1.6555	1	0.077857	Lonp2	1.20979	1	0.134052	Ndufb9	3.0279	0.0447657	0.2668	Rps15	1.10439	1	0.0837648
Tmem60	1.64542	1	0.164385	Ddx21	1.20905	1	0.172438	Tmem208	3.02604	0.0449843	0.423172	Ktn1	1.09987	1	0.642185
Sesn1	1.64439	1	0.286542	Slc9a8	1.20678	1	0.341031	Gmps	3.02328	0.0453397	0.473016	Zfp318	1.09949	1	1.6557
Glmp	1.64193	1	0.216029	Fam53a	1.20512	1	0.224563	Ncbp2	3.01845	0.0458958	0.601094	Nelfb	1.09817	1	0.759205
Fam136a	1.6418	1	0.27559	Scamp1	1.20444	1	0.576827	Dhrs4	3.01685	0.0460807	0.643378	Lsm5	1.0978	1	0.498003
Mctp1	1.6415	1	0.252339	Hdac7	1.20131	1	0.314725	Rps19	3.01067	0.0468524	0.0414491	Manbal	1.09742	1	1.13911
2210013O21Rik	1.64123	1	0.15168	Psap	1.19531	1	0.0988229	U2af2	3.00562	0.047418	0.528067	Akr1b3	1.09742	1	0.56497
Ccz1	1.63892	1	0.292512	Mrps31	1.19365	1	0.258494	Mbd3	3.00551	0.047418	0.610956	Plekha2	1.09686	1	1.16016
Carkd	1.63786	1	0.226336	Atox1	1.19273	1	0.0948927	Ndufaf4	3.00464	0.0474951	0.5315	Tcf12	1.09667	1	0.765067
Sdf2	1.63716	1	0.141343	Pfkp	1.19175	1	0.268253	Tmsb10	3.00402	0.0475327	0.34156	Elf2	1.09667	1	0.703348
Chmp3	1.63412	1	0.324781	Arpc1a	1.18849	1	0.096318	Rwdd1	3.00126	0.047775	0.38198	Hacd1	1.09648	1	1.1109
Spop	1.63285	1	0.117351	Kit	1.18778	1	0.126737	Gart	3.0005	0.0477902	0.533604	Chmp4b	1.0946	1	1.12707
Zfp322a	1.63203	1	0.39808	Irf2	1.18704	1	0.0921315	Rangrf	2.99897	0.0479712	0.439119	Slfn2	1.09422	1	0.899015
Arfgap2	1.63093	1	0.197345	Mmab	1.18634	1	0.740675	Rbm28	2.99843	0.0479849	0.583801	Dido1	1.0929	1	0.83769
Eif2a	1.63054	1	0.111804	Upf2	1.18578	1	0.209144	Psme3	2.99813	0.0479849	0.726169	H2afz	1.09234	1	0.283692
Itm2c	1.63023	1	0.2095	Secisbp2l	1.1824	1	0.603123	Tardbp	2.99305	0.0486727	0.444044	Gon4l	1.09102	1	0.687621
Gm26782	1.63008	1	0.555991	Aff4	1.18142	1	0.418677	Tpi1	2.99178	0.0488161	0.293443	Tarbp2	1.09083	1	1.06009
Keap1	1.62541	1	0.182851	Tpt1	1.18133	1	0.026469	Thoc7	2.98934	0.0491468	0.397014	Cep70	1.09045	1	1.53041
Cep19	1.61608	1	0.365314	Srp72	1.17939	1	0.119498	Zranb2	2.98622	0.0495913	0.358162	Hoxa10	1.09045	1	1.08142
Timm44	1.61204	1	0.254856	Katna1	1.17727	1	0.233271	Yif1b	2.9844	0.049826	0.453265	Sepw1	1.09008	1	0.229969
Bcl7b	1.60882	1	0.264865	Pex5	1.17684	1	0.2921	Mak16	2.98047	0.0504075	0.555436	Chtop	1.08763	1	0.775402
Nudt16l1	1.60746	1	0.190945	Hist3h2a	1.1758	1	0.21555	Eif4ebp1	2.97379	0.0514564	0.377526	Vamp5	1.08744	1	0.356915
Casd1	1.60448	1	0.639084	Kti12	1.17377	1	0.197075	Cfap20	2.96652	0.0526244	0.603775	Cngb1	1.08669	1	1.4558
Por	1.60445	1	0.158101	Ginm1	1.17327	1	0.262782	Csk	2.96572	0.0526974	0.591104	Bre	1.08631	1	0.885498
Hspb11	1.60081	1	0.215844	BC005537	1.17066	1	0.216019	Stk16	2.96518	0.052727	0.49086	A230050P20Rik	1.08462	1	1.58576
Eif3h	1.59492	1	0.0754883	Flywch2	1.17054	1	0.190799	Trmt6	2.95616	0.054096	0.707592	Pdpk1	1.08443	1	1.04727
Napa	1.59164	1	0.161212	Mbp	1.1698	1	0.279243	Psmd3	2.94959	0.0549748	0.529791	Btg1	1.08368	1	1.4952
Zfr	1.59127	1	0.157538	Cmc4	1.16836	1	0.311236	Rnaseh2a	2.94933	0.0549748	0.693016	Thoc2	1.08255	1	0.626575
Gbp8	1.59091	1	0.516794	Haus3	1.16719	1	0.387199	Nrgn	2.94799	0.0551484	0.373788	Atr	1.07916	1	1.42515
Ctsl	1.58957	1	0.162106	Zrsr2	1.16461	1	0.161467	Tsfm	2.94457	0.0556941	0.546442	Mark2	1.07821	1	1.00762
Tlcd2	1.58729	1	0.3859	Dnajc7	1.16384	1	0.107297	St13	2.94381	0.0557115	0.383965	Las1l	1.07765	1	0.712932
Hist4h4	1.58353	1	1.04263	Tmem55a	1.16372	1	0.320413	Chchd1	2.94374	0.0557115	0.369845	Tfpi	1.07727	1	1.05571
Prnp	1.58304	1	0.500403	Chd9	1.15935	1	0.125102	Trp53	2.94123	0.0560307	0.287713	Rnf103	1.0769	1	2.46466
Scaper	1.57454	1	0.334641	Uvrag	1.15914	1	0.244143	Hn1l	2.94014	0.0561614	0.862012	Tnpo3	1.07614	1	0.825547
Gnai3	1.57332	1	0.191417	Phlda1	1.15904	1	1.74404	1810043H04Rik	2.93872	0.0563312	0.419583	C2cd5	1.07483	1	1.00666
Lyz2	1.57217	1	0.0834217	Pfdn2	1.15803	1	0.0930771	Ccdc34	2.93847	0.0563312	0.627559	Il15	1.072	1	1.08672
Rnf114	1.57214	1	0.242152	Dkkl1	1.15717	1	0.164773	Gusb	2.9365	0.0565546	0.534397	Pnpt1	1.07125	1	1.4214
Eif4b	1.57062	1	0.125905	Ngly1	1.1549	1	0.162792	Ube2i	2.93214	0.0572871	0.316075	Tmed4	1.07031	1	0.716332
Ndufa5	1.56977	1	0.099485	Numa1	1.15216	1	0.122004	Gadd45gip1	2.92858	0.0578243	0.384444	Ccdc115	1.07012	1	0.626317
Nucb1	1.56868	1	0.146608	Map2k3	1.14939	1	0.204485	Oxct1	2.92851	0.0578243	0.485005	Rrm1	1.06974	1	1.40166
Rpl11	1.56804	1	0.0397937	Idh1	1.14902	1	0.37138	Psmb4	2.92644	0.0581349	0.318646	Sdsl	1.06974	1	0.678109
Cops8	1.56652	1	0.160298	Twf1	1.14764	1	0.395922	Trnau1ap	2.92498	0.0582772	0.461974	Fmnl2	1.06936	1	2.43752
Mylip	1.56549	1	0.552144	Nudt9	1.14666	1	0.260563	Hp1bp3	2.92397	0.0583994	0.31781	Spg21	1.06918	1	0.673638
Mfap1b	1.55905	1	0.417527	Nrk	1.1442	1	0.496606	Mrps18c	2.90434	0.06197	0.459993	Smad7	1.06918	1	1.4669
Dnajb4	1.55832	1	0.258041	Il4	1.14322	1	0.349892	Ndufaf2	2.9038	0.0620055	0.634875	Rps27a	1.0656	1	0.0833899
Asah1	1.55732	1	0.181556	Dnajc15	1.14085	1	0.13368	Prmt7	2.90111	0.0624671	0.606958	Sqstm1	1.06541	1	0.767013
Mkln1	1.55653	1	0.187139	Dynlt1f	1.13821	1	0.254922	Dnajc15	2.89533	0.0634805	0.465133	Cdkn2d	1.06485	1	0.706383
Eif4e3	1.55611	1	0.314462	Bud31	1.13283	1	0.106397	Kcnq1ot1	2.89253	0.0639	0.203743	Psma5	1.06466	1	0.529547
Spg21	1.55586	1	0.153397	Nsrp1	1.1323	1	0.156435	Ptbp3	2.88665	0.0650244	0.537322	Armc1	1.06259	1	1.06391
Txndc12	1.55468	1	0.422741	Snx12	1.13184	1	0.438171	Bcap29	2.88025	0.0661361	0.474902	Vta1	1.0607	1	0.845786
Gm13830	1.55277	1	1.1191	Hmgb2	1.13147	1	0.033739	Hemgn	2.8732	0.067552	1.11728	Gatm	1.05769	1	1.37541
Ccdc59	1.55189	1	0.164385	Gprasp1	1.13098	1	0.31146	Tmem258	2.86622	0.0688999	0.318503	Cul9	1.05694	1	1.38811
Traf2	1.55094	1	0.460637	Hexim1	1.1264	1	0.442297	Stub1	2.8651	0.0690659	0.421864	Glipr2	1.056	1	0.877474
Xaf1	1.54982	1	0.339116	Bbip1	1.1257	1	0.174278	Pcna	2.86415	0.0691926	0.767251	Pecam1	1.05543	1	1.3741
Nemf	1.54766	1	0.1668	Tsen15	1.12302	1	0.13362	Pdcd5	2.85064	0.0717089	0.334675	Cct5	1.05543	1	0.316416
Hivep3	1.5452	1	0.465136	Epc1	1.12201	1	0.200458	Papola	2.85024	0.0717172	0.356486	Nf1	1.05449	1	2.33908
Tnfrsf25	1.54454	1	1.68813	Taf1d	1.12185	1	0.12448	Atp1b3	2.84835	0.0720623	0.592726	Brd8	1.0543	1	0.760356
Cenpt	1.54441	1	0.21178	Mafk	1.12069	1	0.668596	Adk	2.84798	0.0720626	0.720161	Lig3	1.05242	1	1.3908
Ndufa6	1.54405	1	0.0708391	Pglyrp2	1.11746	1	0.175503	Lmnb1	2.84598	0.072434	1.97274	Ifngr2	1.05129	1	1.41306
Lamtor5	1.54402	1	0.05231	Anxa1	1.11626	1	0.140139	Idh3a	2.8442	0.0727574	0.517732	Fndc3a	1.05035	1	0.804741
Aftph	1.54271	1	0.250534	Plpp3	1.11389	1	0.59508	Hnrnpm	2.84311	0.072924	0.333087	Ensa	1.04884	1	0.737604
Mgme1	1.54256	1	0.435321	Sfswap	1.11386	1	0.209666	Xrn2	2.84137	0.073241	0.398427	Dctn2	1.04733	1	0.658146
Klhdc1	1.54174	1	0.528577	Sdhaf4	1.11257	1	0.109731	Pfdn6	2.8405	0.0733585	0.394743	Myct1	1.04639	1	0.318278
Gm7676	1.54028	1	0.473562	Midn	1.11122	1	0.404146	Galnt6	2.83886	0.0736522	0.669544	Nelfe	1.04489	1	0.995192
Pear1	1.5401	1	0.246398	Rexo1	1.1103	1	0.18027	Sdpr	2.83595	0.0741837	0.752675	Tra2a	1.04451	1	0.446776
Acot1	1.53789	1	0.397702	Sumo1	1.10971	1	0.0291969	Ndufb4	2.83585	0.0741837	0.357034	Mum1	1.04451	1	0.892975
Btbd9	1.53324	1	0.287678	Def8	1.10959	1	0.121839	Dctd	2.83239	0.0745691	0.513258	Snapin	1.04394	1	0.860873
As3mt	1.53193	1	0.148728	Sugp1	1.10812	1	0.741141	Psmd2	2.82393	0.0764744	0.425286	Cited2	1.04281	1	1.06312
Ctsd	1.52902	1	0.113858	Srp19	1.10732	1	0.12232	Grpel1	2.8236	0.0764744	0.423119	Wac	1.04225	1	0.848953
Tmem128	1.52632	1	0.216888	Mfsd10	1.1067	1	0.114105	Mbnl1	2.79086	0.0840922	0.325124	Eif4a1	1.04093	1	0.405926
Btf3l4	1.52443	1	0.137852	Armc5	1.10572	1	0.613067	Mrpl41	2.78773	0.0848134	0.488431	Mrps23	1.04055	1	0.889599
D630039A03Rik	1.5231	1	0.591356	Stxbp5	1.10277	1	0.374194	Lrrc59	2.78588	0.08513	0.683872	Ambra1	1.03698	1	2.2738
Gm16104	1.52291	1	0.509691	G3bp2	1.10252	1	0.102144	Gtf3a	2.78581	0.08513	0.441511	Nipbl	1.03491	1	0.579858
Ddah2	1.52115	1	0.249854	Pnp	1.1008	1	0.0872317	Cdt1	2.78032	0.0863907	1.70973	H2-Aa	1.03453	1	1.12129
Tsen34	1.5207	1	0.151918	Snrnp27	1.09776	1	0.127725	Rrm1	2.77527	0.0875505	0.908192	Atp8a1	1.03057	1	1.45375
N6amt1	1.51308	1	0.257422	Map1lc3a	1.09416	1	0.670316	Inip	2.77127	0.0885351	1.08695	Dcxr	1.03001	1	1.32642
1700029J07Rik	1.51162	1	1.03555	Arid1a	1.09315	1	0.118996	Ube2l3	2.77054	0.0886353	0.335743	Calml4	1.02944	1	2.21472
Selenbp1	1.51065	1	0.17656	Lsp1	1.09118	1	0.107734	Ubap2	2.76935	0.0888644	0.526992	Ap3b1	1.02944	1	0.719511
Atat1	1.50992	1	0.431883	Ube2h	1.0894	1	0.891638	Fam195a	2.76179	0.0903522	0.919292	Laptm5	1.02888	1	0.413643
Zfp106	1.50761	1	0.151344	Gata2	1.08934	1	0.0909805	Txnl4a	2.75859	0.0911415	0.448609	Rnf146	1.02831	1	0.754574
Pdzd2	1.49832	1	0.644747	Dnajc11	1.08808	1	0.253773	Polr2f	2.75485	0.0920903	0.314804	Sp100	1.02681	1	0.911128
Hoxa9	1.49792	1	0.135425	Scfd1	1.08485	1	0.16074	Mrps7	2.74471	0.0947774	0.48632	Grpel2	1.02568	1	1.32264
Cap1	1.49537	1	0.424523	Ogdh	1.08202	1	0.19191	Myl12a	2.74365	0.0949789	0.269999	Taf5l	1.02568	1	1.33019
Casp1	1.49446	1	0.323568	Preb	1.08184	1	0.214591	Eif4g1	2.74046	0.0956179	0.387681	Xpot	1.02568	1	1.33106
Polr3gl	1.49024	1	0.278767	Mndal	1.07999	1	0.112095	Ube2a	2.7337	0.0971606	0.570003	Cnep1r1	1.02455	1	0.989279
Slc35a1	1.48866	1	0.302158	Afg3l1	1.0787	1	0.17841	Chek1	2.73184	0.0976037	2.89317	Uap1	1.02342	1	1.00726
Ate1	1.48751	1	0.234547	Cyb5a	1.07818	1	0.0424905	Ndufc1	2.72977	0.0981134	0.330447	Psmb5	1.02229	1	0.610608
Rab7	1.48696	1	0.114878	Maged1	1.07707	1	0.158815	Mea1	2.72676	0.0989083	0.45238	Slc25a20	1.02116	1	1.293
Stat2	1.4852	1	0.53442	Ubr4	1.07701	1	0.235184	Tmem97	2.72625	0.0989546	0.85801	Rpf1	1.02097	1	0.802595
Card19	1.48465	1	0.116938	Jak1	1.07646	1	0.0873396	Sephs2	2.72494	0.0992411	0.482619	Trim25	1.02041	1	1.29394
Serpinf1	1.48237	1	0.137882	Sdccag8	1.07603	1	0.358262	Dhfr	2.71749	0.101178	1.61039	Tinagl1	1.01852	1	0.774664
mt-Nd3	1.48225	1	0.097923	Pias2	1.07209	1	0.513387	Bola1	2.71327	0.102365	0.483561	Batf2	1.01664	1	2.13617
Ppt1	1.48161	1	0.185954	Mkln1	1.0693	1	0.132887	Eif4a3	2.71255	0.10248	0.363022	Ankrd17	1.01495	1	0.665149
Zmynd8	1.4777	1	0.16636	Wsb1	1.06776	1	0.162564	Mgat2	2.71153	0.102535	0.387918	Strn3	1.01212	1	1.06544
Emp3	1.47694	1	0.0429291	Pla2g4a	1.06761	1	0.158773	Psmd13	2.71138	0.102535	0.460612	Serinc1	1.01156	1	0.651419
Yipf2	1.47542	1	0.49676	Acox3	1.06751	1	0.810802	Utp14a	2.71131	0.102535	0.5561	Taf1	1.00948	1	0.898693
Gm11808	1.47423	1	0.069895	Acbd6	1.06398	1	0.203773	Wdr77	2.70993	0.102853	0.559584	Sub1	1.00609	1	0.231741
Pla2g16	1.47144	1	0.0860923	Taf11	1.06386	1	0.165597	Sdad1	2.70688	0.103584	0.549031	Zc3hav1	1.00591	1	1.26974
Dhx30	1.4701	1	0.258377	Aamp	1.06192	1	0.091036	Tpr	2.70019	0.105465	0.244831	Parn	1.00384	1	1.27812
Tbcc	1.46901	1	0.255804	Stambpl1	1.061	1	0.451881	Wdr75	2.69907	0.105685	0.725051	Apobec1	1.00158	1	2.25319
Trim12c	1.46731	1	0.261954	Rraga	1.06038	1	0.125972	Wdr74	2.69845	0.105685	0.563861	Tex261	0.999881	1	0.458696
Pstk	1.46364	1	0.229694	Ndufaf7	1.05949	1	0.304489	Mrps12	2.69696	0.106005	0.366341	Atp6v1g1	0.997998	1	0.488506
Arf1	1.4627	1	0.062555	Med31	1.05909	1	0.214704	Atp5c1	2.69674	0.106005	0.187379	Rab1b	0.995738	1	1.26352
Rab11b	1.46233	1	0.102016	Lpin1	1.05808	1	0.403825	Eed	2.6922	0.107234	0.845859	Mapkapk2	0.995174	1	2.27764
Rsbn1l	1.46102	1	0.0615496	Exoc2	1.05783	1	0.462615	Hcst	2.68973	0.107918	1.05655	Prtn3	0.995174	1	0.501205
Slc50a1	1.46066	1	0.0741989	Fggy	1.05651	1	0.358	Stag1	2.68835	0.108186	0.448569	Arhgap6	0.994797	1	1.16262
Naa20	1.45929	1	0.141141	Ppme1	1.05645	1	0.221275	Msra	2.6882	0.108186	0.570744	Ppt2	0.993667	1	0.727532
Mrpl49	1.45835	1	0.346262	Tcf25	1.05519	1	0.0871133	Tmpo	2.68213	0.109938	0.631852	Kif5b	0.992914	1	0.535501
Zfp68	1.45471	1	0.286656	Trim47	1.05463	1	0.150013	Marcksl1	2.67853	0.11101	0.394518	Alox5ap	0.992537	1	0.380187
Tmem159	1.45447	1	0.357025	Gtpbp3	1.05301	1	0.583094	Nars	2.67614	0.111575	0.427172	Arl1	0.990843	1	0.546808
1110059G10Rik	1.45371	1	0.238502	Ndn	1.05255	1	0.142801	D10Wsu102e	2.66996	0.113295	0.677557	Gna13	0.990654	1	1.01209
Il10rb	1.45173	1	0.321805	Vegfc	1.05224	1	0.4776	Slc19a1	2.66458	0.114815	0.722083	Rras	0.990278	1	1.34555
Rhoa	1.45046	1	0.0632225	Arhgef6	1.05218	1	0.151548	Tex30	2.66451	0.114815	0.786621	Pja2	0.990089	1	0.936027
Tmem9	1.44821	1	0.207179	Igf1	1.05024	1	0.446944	Lrrc58	2.65906	0.116304	0.437177	Trappc13	0.989901	1	0.943398
Med28	1.44426	1	0.0605466	Fig4	1.04956	1	0.663334	Rnf219	2.6568	0.116963	0.640224	Unc13d	0.98896	1	0.767493
Zfp277	1.43767	1	0.436858	Ddx27	1.04704	1	0.102209	Sssca1	2.64848	0.119268	0.437035	Lsm10	0.988206	1	0.72538
Phyh	1.4357	1	0.330015	Tifa	1.04569	1	0.1677	Ubl4a	2.64634	0.119659	0.603264	Palld	0.988018	1	2.02531
1110012L19Rik	1.43406	1	0.274632	Sipa1l1	1.04514	1	0.504275	Gemin6	2.6419	0.120989	0.924535	Manf	0.987453	1	0.50258
Pex3	1.43391	1	0.609085	Arl8a	1.04471	1	0.847135	Tma16	2.641	0.121171	0.64007	Ets2	0.986888	1	2.0085
Cetn2	1.43254	1	0.120877	Glipr2	1.04388	1	0.16396	Noa1	2.64071	0.121171	0.851929	9430038I01Rik	0.986135	1	1.24098
Rpl22	1.4258	1	0.0341664	Ahctf1	1.04348	1	0.183275	Hspbp1	2.63369	0.123577	0.404929	Dhfr	0.985382	1	1.96056
Atp6v1b2	1.42498	1	0.280466	Atf7	1.04277	1	0.220704	Polr3g	2.63264	0.123835	1.1455	Pcca	0.985194	1	1.22981
Thra	1.42218	1	0.252689	Nrxn1	1.04234	1	0.378731	Farsa	2.63184	0.124001	0.420375	Sft2d2	0.984629	1	1.23951
Ino80e	1.41812	1	0.252985	Pygm	1.04231	1	0.376747	Ctbp1	2.62642	0.125864	0.689169	Fbxo17	0.984252	1	2.0082
Sirt7	1.41644	1	0.255131	Flot1	1.04197	1	0.118037	Sf3b4	2.62432	0.126517	0.435437	Imp4	0.983687	1	0.711519
Rufy2	1.41617	1	0.3768	Bag6	1.04139	1	0.32226	Chd4	2.61451	0.129554	0.296197	Cul4b	0.983499	1	2.28654
Atp5a1	1.41426	1	0.0297145	Atp6v1f	1.0412	1	0.04133	Nxf1	2.61411	0.129575	0.372567	Rab10os	0.982746	1	0.907184
Unc50	1.41405	1	0.150624	Rfc3	1.04102	1	0.195323	Gp9	2.61185	0.13017	0.522352	Nars	0.982369	1	0.61367
Kxd1	1.41371	1	0.153756	Asb8	1.04031	1	0.267708	Rbm10	2.60804	0.131498	0.59567	Brd4	0.981804	1	0.760361
Fmo5	1.41341	1	0.541854	Os9	1.03893	1	0.106337	Nefh	2.60382	0.132727	0.572461	Nudt18	0.981616	1	1.25772
Msrb1	1.41335	1	0.425805	Serp1	1.03785	1	0.114637	Polr1d	2.59815	0.134669	0.21789	Mcm2	0.97785	1	0.896858
Uqcc3	1.41317	1	0.0606222	Rin3	1.03727	1	0.403852	Rpl10a	2.59761	0.134748	0.0485285	Tmem140	0.977285	1	1.35222
St8sia4	1.41238	1	0.343323	Eif2s3y	1.03641	1	0.276405	Gm2000	2.59565	0.135379	0.372752	Tcf25	0.977285	1	0.448922
Eng	1.41146	1	0.13064	Leprotl1	1.03632	1	0.1303	Psmc2	2.59532	0.135379	0.380787	Acadl	0.97672	1	0.623672
Rcn3	1.41098	1	0.255631	Prkcd	1.03423	1	0.240369	Pola1	2.59154	0.136739	1.09432	Orai3	0.975214	1	0.804164
Plscr4	1.4094	1	0.413305	Zfp800	1.03423	1	0.169367	Cisd2	2.59118	0.136748	0.353999	Hddc2	0.974084	1	0.750726
Pnp	1.40822	1	0.103126	Zmiz1	1.03275	1	0.173975	Luc7l3	2.58841	0.137713	0.317132	Glrx	0.972389	1	0.692642
Telo2	1.40658	1	0.258436	Snap23	1.03254	1	0.111469	Mcmbp	2.57788	0.141703	1.09571	Ift57	0.972012	1	0.937955
Dennd1c	1.40551	1	0.288007	Meg3	1.03217	1	0.146403	Cops5	2.57682	0.141995	0.39984	Sap18	0.971636	1	1.18589
Adck3	1.40402	1	0.285213	Prkacb	1.03075	1	0.172664	Myb	2.5701	0.144638	0.376441	Fam188a	0.971448	1	1.93957
Itfg1	1.40266	1	0.412688	Rab11fip1	1.02667	1	0.738932	Aurkaip1	2.56879	0.144898	0.33381	Cops5	0.971071	1	0.584808
Rdm1	1.40126	1	0.315669	Stk40	1.02657	1	0.688251	Nhp2l1	2.56567	0.145779	0.260739	Nemf	0.970883	1	0.582437
Pex14	1.40035	1	0.372898	Plekho2	1.02645	1	0.263514	Prelid1	2.56367	0.146477	0.376102	Pmpcb	0.969753	1	0.72709
Exoc6b	1.39992	1	0.394538	Prrc2c	1.02608	1	0.0735521	Gatm	2.56109	0.147425	0.92037	Mast4	0.969188	1	0.78842
Commd6	1.39737	1	0.158752	Tex261	1.02522	1	0.0949837	Coro2a	2.5552	0.149795	0.541064	Zfp426	0.969188	1	1.9235
Gprasp2	1.39698	1	0.527398	Camk2d	1.02494	1	0.144905	Slc39a1	2.55197	0.150896	1.30621	Gm16104	0.968811	1	1.31126
Ebpl	1.3964	1	0.158947	Zfand1	1.0239	1	0.219543	Dnajc19	2.55055	0.151363	0.381059	Zfp617	0.968246	1	1.93758
Arhgef3	1.39622	1	0.787979	Map3k1	1.02338	1	0.400602	Acin1	2.54692	0.152613	0.278579	Clic4	0.967682	1	1.21684
Anxa6	1.39607	1	0.355831	Hdac11	1.01788	1	0.438455	Idh2	2.53779	0.155775	0.33356	Gdi1	0.967305	1	0.907037
Gbas	1.38772	1	0.182953	Akap9	1.01468	1	0.0833493	Ctps	2.52849	0.1595	1.25887	Wwp2	0.967117	1	1.22065
Alcam	1.38556	1	0.31507	Tmem191c	1.01385	1	0.30139	Prpf4b	2.52689	0.159913	0.33252	Rassf1	0.96674	1	0.758797
Dtd2	1.38444	1	0.269789	Mir142hg	1.01237	1	1.06367	Psme2	2.52657	0.159913	0.338005	Zfp932	0.966552	1	1.94934
Tgm2	1.38331	1	0.159248	Trp53i11	1.01078	1	0.320419	Haus7	2.52431	0.160787	0.810816	Raf1	0.965799	1	0.79538
Ppig	1.38225	1	0.0848823	Cnot10	1.01065	1	0.407819	Mrps14	2.52126	0.161877	0.259572	P4hb	0.965799	1	0.777245
Ccnd3	1.38131	1	0.069629	Zrsr1	1.00862	1	0.575376	Dap3	2.52002	0.16229	0.405344	Msi2	0.965234	1	0.480628
Esco1	1.37806	1	0.317803	Taf13	1.00835	1	0.240103	Aimp1	2.51417	0.164793	0.353363	Myl10	0.964857	1	0.852229
Sept1	1.3776	1	0.135836	Cxx1b	1.0081	1	0.444385	Cenpm	2.5121	0.165502	2.03639	Mgmt	0.963351	1	0.900921
Ctps2	1.37675	1	0.297003	Fam118b	1.00537	1	0.795481	mt-Nd1	2.5117	0.165531	0.0864753	Gcfc2	0.961656	1	1.89386
Wnk1	1.37487	1	0.134058	Prkar1a	1.00426	1	0.0986463	Ipo7	2.50981	0.166261	0.875404	Bloc1s1	0.95902	1	1.89952
Gtf2h3	1.37399	1	0.324116	Slc38a1	1.00343	1	0.132506	Psip1	2.50146	0.16975	0.478746	Scamp3	0.958455	1	0.860763
Dtx3l	1.37384	1	0.368732	Fam110c	0.999587	1	0.241226	Wdr36	2.49778	0.171191	0.740389	Auts2	0.95789	1	1.91825
Mkrn1	1.37281	1	0.14782	Gm4707	0.999464	1	0.620874	Gcsh	2.49517	0.172295	0.443999	Cdk18	0.957137	1	1.91129
Ube2l6	1.37244	1	0.141982	Slc27a1	0.999434	1	0.569008	Rpn2	2.49212	0.173618	0.300718	Ndufaf2	0.957137	1	0.87203
Rtn3	1.37232	1	0.172309	Aldoc	0.996421	1	0.222303	Pole3	2.48746	0.175405	0.463547	Arap1	0.957137	1	1.17568
Fbxl12	1.36801	1	0.45011	Ppp2r3a	0.995899	1	0.393354	Gtf2a2	2.48746	0.175405	0.343964	Enpp5	0.955065	1	1.34881
5930430L01Rik	1.36758	1	1.01051	Sar1b	0.993963	1	0.128554	Pole4	2.47954	0.179011	0.341797	Gtf2h5	0.954124	1	0.539805
Tox	1.36628	1	0.404344	Clip1	0.993563	1	0.137669	Eif1ad	2.47678	0.180062	0.606923	Fdx1l	0.953559	1	0.590345
Rsu1	1.366	1	0.0670993	N4bp2l1	0.992364	1	0.303009	Anp32a	2.4758	0.180387	0.237563	Fam32a	0.952994	1	0.445963
Atp6v0e	1.36476	1	0.0184049	Cnot6l	0.992272	1	0.149492	Sec13	2.47278	0.181404	0.505753	Trp53i11	0.952429	1	1.19501
Vps26a	1.36266	1	0.285204	Mtx1	0.992057	1	0.196177	Lamtor2	2.47202	0.181621	0.318294	Ube2n	0.951676	1	0.488166
Pddc1	1.36215	1	0.185338	Sept6	0.991811	1	0.0947694	Arpc2	2.46584	0.184204	0.11295	Ubr7	0.949228	1	1.17327
Pcbd1	1.36093	1	0.342176	Cwc25	0.991504	1	0.277536	Rps15a	2.46563	0.184204	0.0377333	Lman2	0.948851	1	0.609262
Cisd3	1.36014	1	0.465449	Usp15	0.988738	1	0.136384	Rnmt	2.46119	0.186322	0.467876	Ubn2	0.948287	1	0.8049
Dcaf17	1.35826	1	0.232994	Qser1	0.987109	1	0.329649	Psat1	2.45843	0.187586	0.868412	4930556M19Rik-1	0.946968	1	1.85623
Cldnd1	1.3575	1	0.10725	0610037L13Rik	0.986309	1	0.217737	Csnk2b	2.45701	0.187976	0.385635	Tmem120a	0.946968	1	1.85499
Cmas	1.35276	1	0.302213	Sun2	0.985234	1	0.286655	Clec2d	2.45636	0.188143	0.396215	Gm26782	0.946592	1	1.16591
Polr1c	1.35228	1	0.145489	Ptpra	0.981422	1	0.232844	Rps7	2.45211	0.190204	0.0392135	Cdca7l	0.946403	1	0.660759
Sirt2	1.35137	1	0.229064	Gpd2	0.981115	1	0.154436	Etfa	2.45065	0.190796	0.405613	Nap1l3	0.946403	1	0.745701
Epb41l4aos	1.34751	1	0.178926	Arfgap1	0.980009	1	0.33979	Cenpb	2.44909	0.191448	0.845755	Col16a1	0.946403	1	1.80998
Tmed9	1.34645	1	0.0657283	Hps1	0.97838	1	0.359966	Eprs	2.44426	0.193494	0.28038	Ppp3ca	0.945462	1	0.60201
Ifitm7	1.34484	1	0.392598	Scand1	0.977519	1	0.160835	Asns	2.43601	0.197051	0.913253	Map4	0.945085	1	1.83033
Rab14	1.34371	1	0.0856677	Elk4	0.977427	1	0.260717	H2-Ke6	2.43252	0.198776	0.508437	Wdr44	0.944332	1	1.86917
Rbm11	1.34317	1	1.16562	Atxn2l	0.977242	1	0.337947	Rbbp7	2.43089	0.199308	0.268601	Inpp5d	0.944332	1	0.88373
Apbb1ip	1.3428	1	0.110674	Tcof1	0.977058	1	0.113045	H2afv	2.43038	0.199405	0.225241	Eif2ak1	0.943767	1	1.17975
S100a6	1.34098	1	0.142909	Fbxo7	0.975552	1	0.27819	Pusl1	2.42805	0.200277	0.944699	Edc3	0.943391	1	1.14677
Hip1r	1.33946	1	0.649447	Tomm40l	0.975152	1	0.365341	Rabepk	2.42707	0.200495	0.455789	Sik1	0.942826	1	0.863276
RP23-6I17.1	1.33861	1	0.356912	Asah1	0.973278	1	0.142197	Trnt1	2.42565	0.201096	0.54647	Abl2	0.942449	1	1.86219
Rps29	1.33807	1	0.0245972	Tnrc6c	0.970603	1	0.23904	Psmb6	2.42482	0.201375	0.221134	Pex7	0.942449	1	0.800517
Psme1	1.33606	1	0.033011	Ap2a1	0.969466	1	0.396708	Tubb5	2.42126	0.203174	0.22517	Srsf3	0.941884	1	0.364368
Egfl7	1.33321	1	0.118089	5830454E08Rik	0.968421	1	0.666099	Eif6	2.41918	0.204148	0.327649	Lyrm5	0.941696	1	1.1556
Tmx1	1.33275	1	0.19329	D3Ertd751e	0.968329	1	0.254061	Mdn1	2.4178	0.204551	0.691436	Tspan13	0.940566	1	0.526452
Rnf181	1.3309	1	0.300024	Tob1	0.968175	1	0.534773	Mrps10	2.41086	0.207542	0.41547	0610010K14Rik	0.939248	1	0.87613
Txndc9	1.33029	1	0.0770065	Rhoj	0.967929	1	0.376335	Usp37	2.40861	0.208073	0.896879	Agtrap	0.939248	1	0.736669
Zfp1	1.32923	1	0.427196	Gbp2	0.967407	1	0.153758	Ten1	2.40708	0.208756	0.388052	Cycs	0.938683	1	0.689077
Ctss	1.32817	1	0.721966	Dynll2	0.966823	1	0.0863074	Hsd17b12	2.40545	0.209504	0.362731	Vamp7	0.938307	1	0.901942
Kcnn4	1.32701	1	0.131195	Nfix	0.966792	1	0.131793	Eif2b1	2.40494	0.209607	0.520512	Acd	0.937365	1	1.14644
Dnajb2	1.32546	1	0.318601	Eif3e	0.966454	1	0.025303	Sf3a1	2.40356	0.209812	0.460811	Nfe2	0.936235	1	0.522847
Ap3b1	1.32525	1	0.225593	Vezf1	0.964856	1	0.120083	Phrf1	2.40345	0.209812	0.684277	Zfp68	0.932658	1	0.858963
Vsig10	1.32492	1	0.544989	Wipi2	0.963965	1	0.214131	Kctd1	2.40345	0.209812	0.699336	Rgcc	0.932281	1	0.869176
Rps7	1.32382	1	0.0185748	Nf1	0.962489	1	0.713679	Med1	2.40254	0.210041	0.543191	Actn4	0.931904	1	0.864275
9130008F23Rik	1.32358	1	0.679291	Csrp2	0.961506	1	0.149772	Fyb	2.4012	0.210626	0.473935	Irf6	0.931528	1	1.80538
BC031181	1.32294	1	0.0659821	Ubl5	0.956834	1	0.0654783	Clns1a	2.39796	0.211926	0.369371	Ndufa5	0.930774	1	0.495851
Ube2w	1.32249	1	0.321373	Dennd2d	0.956066	1	0.186102	Cenpw	2.39149	0.21493	1.01331	Ints12	0.930398	1	1.79538
Fam173a	1.32227	1	0.189807	Fbxw17	0.956066	1	0.631798	Nudt19	2.39051	0.215313	0.520717	Pdlim7	0.930021	1	1.12209
Ppp3ca	1.31796	1	0.135047	H2-Oa	0.955697	1	0.372757	Exosc4	2.38793	0.216254	0.427475	Sars	0.928138	1	0.707788
5730409E04Rik	1.31699	1	0.541459	Hmg20a	0.954805	1	0.290935	Emg1	2.38673	0.216769	0.188565	Dek	0.927762	1	0.495683
Emcn	1.31562	1	0.229313	Copb1	0.95376	1	0.108723	Anapc15	2.38375	0.217825	1.10756	Uchl5	0.926632	1	0.607207
Tmem242	1.31441	1	0.257734	Mprip	0.953084	1	0.19122	Lockd	2.38364	0.217825	0.923113	Mtmr2	0.925879	1	1.80156
Leng8	1.31417	1	0.468694	Calm2	0.952746	1	0.0689766	Tmem222	2.38328	0.217848	0.45826	Lin7c	0.92569	1	1.17885
Rbfa	1.31259	1	0.169283	Spryd3	0.952131	1	0.458631	Jagn1	2.38106	0.21897	0.418341	Pih1d1	0.925502	1	0.69234
D230025D16Rik	1.3125	1	0.690269	Furin	0.949334	1	0.365262	Aqp1	2.37383	0.222805	1.57207	Mtfr1l	0.924184	1	0.661223
Ccdc91	1.31237	1	0.316888	Ftsj1	0.94872	1	0.443791	Pold3	2.37369	0.222805	0.666954	Pabpn1	0.923619	1	0.865937
Hist1h1d	1.31086	1	0.835593	Tns1	0.948627	1	0.220781	Ftsj3	2.37093	0.224279	0.480095	Tmem251	0.923431	1	1.11929
Tax1bp1	1.31061	1	0.0320805	Foxo1	0.947767	1	0.406759	Nubp1	2.37005	0.224612	0.712251	Map2k1	0.922301	1	0.740364
Tm2d2	1.31052	1	0.0773949	Atp6v1g1	0.947767	1	0.033615	Myh9	2.36969	0.224636	0.434104	Ranbp3	0.921736	1	1.13267
Mpv17	1.3097	1	0.284059	Vps18	0.947521	1	0.586774	Fh1	2.36929	0.224682	0.489595	Ppib	0.917405	1	0.4565
Hibadh	1.30894	1	0.101714	Prelid2	0.947152	1	0.268435	Psmg3	2.36758	0.225524	0.53138	Ggct	0.917028	1	1.12998
Snw1	1.30846	1	0.0526381	Hsdl2	0.946722	1	0.233743	Smco4	2.3666	0.225794	0.575619	Bfar	0.914957	1	0.619973
Stat3	1.30761	1	0.129973	Ier3ip1	0.946138	1	0.11523	Wdr18	2.36595	0.22593	0.506306	Nde1	0.914392	1	1.1025
Fbxo11	1.30624	1	0.551087	Golga2	0.945984	1	0.541846	Bri3bp	2.36475	0.226465	0.511442	Rlim	0.913262	1	0.599679
Trip11	1.30296	1	0.207906	Diaph1	0.944663	1	0.0600279	Acaa2	2.36057	0.228634	0.435612	Traf7	0.911756	1	1.15194
Ubald2	1.3026	1	0.15069	Zbtb38	0.943802	1	0.109214	Mina	2.35915	0.229309	0.507241	Mcrs1	0.911379	1	0.789451
Skp1a	1.30217	1	0.0675716	3110043O21Rik	0.94371	1	1.20765	Rpl31	2.35697	0.229861	0.0511019	Cnot11	0.911191	1	1.7415
Atp6v0d1	1.30141	1	0.216177	Maf1	0.942081	1	0.109611	Ndufv1	2.35585	0.230074	0.391243	Zfp579	0.910061	1	1.09999
0610009B22Rik	1.30071	1	0.186368	Dcp2	0.941159	1	0.273184	E2f4	2.35566	0.230074	0.60152	Cep78	0.910061	1	1.7036
Ndufa9	1.30032	1	0.110134	Gga1	0.940175	1	0.208412	Tfam	2.35566	0.230074	0.368811	Phf11b	0.908932	1	1.8554
Ppp1r9b	1.30011	1	0.294464	Xab2	0.939991	1	0.201698	Odc1	2.35392	0.230739	0.477887	Mta3	0.908555	1	1.7315
Gm16638	1.29965	1	1.15184	Gm26802	0.939745	1	1.46462	Pradc1	2.35363	0.230739	0.989477	Med31	0.90799	1	0.827617
Plekha2	1.29789	1	0.296407	Rras	0.939683	1	0.308929	Nedd8	2.34611	0.235246	0.200584	Pck2	0.90799	1	0.904116
Cyp2j9	1.29497	1	0.583527	Gla	0.939653	1	1.38243	Etf1	2.33964	0.238743	0.483894	Plac8	0.907613	1	0.757003
Ppp2r1a	1.29048	1	0.164647	Rhobtb3	0.939345	1	0.48542	Fam60a	2.33902	0.238933	0.509548	Mlkl	0.904789	1	1.78897
Zcchc11	1.28781	1	0.144655	Mff	0.938239	1	0.0990877	Snrpb2	2.33637	0.240428	0.343343	Cep41	0.904036	1	1.88302
Ppt2	1.2865	1	0.19419	Aup1	0.936518	1	0.187726	Pole2	2.3335	0.241729	1.81935	Pias1	0.904036	1	0.847508
Snx6	1.28568	1	0.0996692	Rgag4	0.936395	1	0.574175	Tomm22	2.33281	0.241898	0.31106	Ezh1	0.903471	1	1.08504
Csnk1e	1.2852	1	0.199788	Trappc4	0.936302	1	0.090001	Sox4	2.33233	0.241996	0.34099	Rfc3	0.903282	1	0.90069
Tbc1d17	1.28428	1	0.234145	Edem2	0.935934	1	0.124653	Hspa14	2.33023	0.242947	0.425919	Aplp2	0.902906	1	0.495202
Trim8	1.28356	1	0.472843	Rassf5	0.934735	1	0.134143	Aen	2.32917	0.243423	0.614297	Atic	0.902718	1	0.489427
Phactr2	1.28216	1	0.306639	C2cd5	0.934274	1	0.210973	Gm16286	2.32612	0.244995	0.298884	Msn	0.902529	1	0.351859
Pcp4l1	1.28128	1	0.418724	Epb41	0.933659	1	0.143418	Lgals9	2.32485	0.24532	0.43145	Cep104	0.901399	1	1.68056
Ndnl2	1.28113	1	0.127895	Ifrd1	0.932122	1	0.160152	Dnaja1	2.32125	0.247351	0.173695	Ranbp9	0.899893	1	1.69781
Cir1	1.27824	1	0.163853	Atp7a	0.931815	1	0.532321	Exosc7	2.31729	0.249758	0.3194	Glrx2	0.899328	1	0.555437
Ptp4a2	1.27779	1	0.0894759	Ring1	0.930555	1	0.188141	Qdpr	2.31605	0.250204	0.364645	Rexo2	0.89914	1	0.473452
Ociad1	1.2769	1	0.068729	Sbno1	0.930463	1	0.089309	Metap2	2.31598	0.250204	0.264739	4732440D04Rik	0.898763	1	1.63298
Iqcc	1.27569	1	0.523649	Vps35	0.929909	1	0.112082	Rps26	2.31482	0.250766	0.15631	Zfp36	0.897633	1	0.475653
Chst15	1.27536	1	0.641381	Usp3	0.928496	1	0.197115	Birc6	2.31438	0.250845	0.429282	Vdac2	0.896315	1	0.424805
Prcc	1.27414	1	0.528407	Exoc3	0.927727	1	0.148622	Rwdd4a	2.31377	0.251044	0.518467	Secisbp2l	0.89575	1	1.82329
Prorsd1	1.27229	1	0.215486	Sult1a1	0.927543	1	0.104971	Immp1l	2.31246	0.251705	0.339146	Acbd6	0.895562	1	0.662477
1700020I14Rik	1.27135	1	0.184847	2310036O22Rik	0.927082	1	0.0486288	Fam212a	2.31206	0.25176	0.26742	Ikzf5	0.892926	1	1.68036
Afap1l1	1.2674	1	0.146964	Tspo	0.926774	1	0.072027	Cenpe	2.31017	0.252812	2.4929	Ndufb11	0.892549	1	0.369949
Rps28	1.26725	1	0.0316132	Zfp787	0.926313	1	0.210098	Cops3	2.30846	0.253727	0.379553	Atg4b	0.891984	1	1.06321
Cmtm3	1.26521	1	0.407904	Zbtb17	0.924684	1	0.596994	Aatf	2.30323	0.256852	0.445501	Setd1b	0.891608	1	0.905829
Pink1	1.265	1	0.370423	Rhoq	0.924254	1	1.07965	Cfdp1	2.30217	0.257353	0.339439	Nip7	0.89142	1	0.584991
Fcer1g	1.26476	1	0.145057	Id2	0.924008	1	0.521193	Dars	2.29807	0.259898	0.357594	C330006A16Rik	0.890855	1	1.6464
Ube2e3	1.26461	1	0.213209	Ttc19	0.923639	1	0.454956	Sept7	2.29781	0.259898	0.233268	Fam189b	0.889725	1	1.60533
Atxn7l3b	1.25975	1	0.0475998	Wasf2	0.923578	1	0.0788962	Creld2	2.29694	0.259995	0.689222	Fosb	0.888595	1	0.447669
Ubr1	1.25932	1	0.495312	Ankle2	0.923516	1	0.342454	Med8	2.29672	0.259995	0.427044	Cxcl10	0.888595	1	8.43197
Chil5	1.25826	1	0.540251	Sh3d21	0.923393	1	1.37567	Eif2s2	2.29472	0.260716	0.257273	Tubg1	0.887465	1	1.81463
Abi3	1.2513	1	0.379634	Lrrc8d	0.922318	1	0.486959	Helb	2.29382	0.261124	1.1114	Rpsa	0.886712	1	0.137039
Ndufa13	1.25085	1	0.0310187	Ranbp2	0.920474	1	0.256104	Nme4	2.2916	0.262435	0.359233	Ctss	0.883323	1	1.74635
Synj2bp	1.25024	1	0.165452	Svbp	0.920228	1	0.122132	Atad5	2.28971	0.263525	1.44297	Tmpo	0.881439	1	0.812151
Gm15013	1.24985	1	0.0250561	B2m	0.919982	1	0.0283013	Ddx49	2.28662	0.264795	0.596104	Lman1	0.881439	1	0.541123
Triap1	1.24933	1	0.261592	Trak1	0.919459	1	0.801379	Capzb	2.28277	0.266733	0.236634	Gm7808	0.881063	1	1.61467
Sp110	1.24796	1	0.103068	Cyth3	0.919336	1	0.365172	Magohb	2.28266	0.266733	0.494676	Mrpl27	0.879745	1	0.626402
Lyrm2	1.24796	1	0.277667	Gm42418	0.919029	1	0.0918934	Trim28	2.28259	0.266733	0.647637	Arnt	0.879556	1	1.63549
Creg1	1.2452	1	0.0238695	Tvp23b	0.918875	1	0.13946	1190007I07Rik	2.28077	0.267787	0.401024	Bcs1l	0.87918	1	1.05051
Stag2	1.24435	1	0.185543	Znrd1	0.917677	1	0.0802033	Pinx1	2.27703	0.270206	0.812165	Stk24	0.878615	1	1.03972
Rnf5	1.24292	1	0.264482	Cyb5r4	0.917492	1	0.165201	Gt(ROSA)26Sor	2.27612	0.270627	0.612725	Zkscan17	0.878427	1	1.62262
Invs	1.23907	1	0.64142	Cep290	0.917154	1	0.209014	Phf5a	2.27561	0.270765	0.37226	Them4	0.87805	1	1.61394
Mir155hg	1.23816	1	0.651417	Ube2d3	0.915187	1	0.072441	Cuedc2	2.26631	0.276071	0.307753	Tmem5	0.877862	1	0.659612
Krcc1	1.23737	1	0.105554	Fgf11	0.912329	1	1.28677	Polr2l	2.26445	0.277183	0.595024	Msl2	0.876355	1	1.05912
Myof	1.23724	1	0.332971	Zmynd8	0.912329	1	0.116472	Mrpl15	2.26176	0.278451	0.354799	Npat	0.876167	1	1.55451
Rfxank	1.23658	1	0.640624	Gm10941	0.911007	1	2.19285	Ccdc107	2.261	0.278778	0.354433	Rpl6	0.876167	1	0.198086
Gimap3	1.23588	1	0.882418	Frmd8	0.91073	1	0.222831	Edf1	2.25795	0.280318	0.238378	Grcc10	0.875979	1	0.803789
Nipsnap1	1.23585	1	0.263079	Trafd1	0.910392	1	0.179155	Ddost	2.25726	0.280594	0.311559	Trib3	0.87579	1	1.08831
Thap3	1.23245	1	0.12695	Rsrc2	0.90947	1	0.0728482	Ccdc115	2.25457	0.281889	0.354965	Hdac11	0.873531	1	1.83877
Anapc7	1.22962	1	0.292483	Atg16l1	0.908302	1	0.381209	Mta2	2.25435	0.281889	0.470086	Elac2	0.873531	1	1.62601
Rbm43	1.22835	1	0.175817	Cd99l2	0.907718	1	0.351668	Nit2	2.25424	0.281889	0.424362	Ddx6	0.872024	1	0.647128
Bex1	1.22741	1	0.090536	Lamb3	0.90738	1	0.853719	Matr3	2.25424	0.281889	0.303013	Cyld	0.872024	1	1.03127
Gda	1.22495	1	0.271437	Dhx40	0.906858	1	0.821792	Slc16a1	2.25155	0.283636	1.0746	Itch	0.871648	1	0.636421
BC028528	1.2241	1	0.256573	Erdr1	0.905628	1	0.471456	Ufsp2	2.24588	0.287375	0.507692	Gemin7	0.870895	1	0.738293
Rtn4	1.22294	1	0.410899	Ccng2	0.905413	1	0.315663	Slc43a3	2.24458	0.287886	1.02873	Ptov1	0.870895	1	0.842953
Tmsb4x	1.22112	1	0.0187424	Usp22	0.90403	1	0.353847	9130401M01Rik	2.2433	0.288603	0.490496	Ifi204	0.869765	1	5.27339
Pnrc2	1.22024	1	0.139756	R3hdm4	0.899143	1	0.0781264	Gins4	2.23676	0.292779	0.455573	Zmat5	0.869012	1	0.60867
Kmt2a	1.21969	1	0.0789298	Fam65b	0.898528	1	0.128759	Dda1	2.23665	0.292779	0.462334	Lrp6	0.867882	1	1.68937
Arhgef12	1.21902	1	0.521434	Tmem246	0.896961	1	0.206951	Mrpl11	2.23651	0.292779	0.356944	Sod1	0.867129	1	0.424648
Lrrk1	1.21684	1	0.269832	Ensa	0.896162	1	0.124887	Fkbp5	2.23451	0.293627	1.05774	Gm561	0.86694	1	0.8006
Rps12-ps3	1.21684	1	0.0255968	AY036118	0.895946	1	0.480314	Ndufa7	2.23433	0.293627	0.24177	Ggnbp1	0.86694	1	1.58556
Kifap3	1.21529	1	0.286534	Herc1	0.895086	1	0.137887	Glipr1	2.23433	0.293627	0.321662	Ms4a4b	0.866375	1	5.26041
Dap	1.21362	1	0.125804	Ift88	0.893979	1	0.610692	Mpc1	2.23415	0.293627	0.329556	Gprc5b	0.864869	1	1.58801
Ik	1.21277	1	0.134121	Xpa	0.892781	1	0.687932	Haus1	2.23215	0.29491	0.727538	Vcl	0.864681	1	1.57098
Asph	1.21222	1	0.242556	Rpl21	0.891766	1	0.0242875	Ndrg1	2.23146	0.2952	0.841406	Ahi1	0.864116	1	0.868
Zfp51	1.20776	1	0.762611	BC029214	0.89023	1	0.171975	Brd3	2.22957	0.296405	0.404735	Rars	0.863363	1	0.710331
Tpp1	1.20761	1	0.3042	Dock10	0.889738	1	0.301197	Cox18	2.22455	0.299442	0.752341	S100a10	0.862609	1	0.327342
Rfk	1.20706	1	0.238351	Stard5	0.889308	1	0.877427	Usp39	2.22306	0.300212	0.660214	Slc50a1	0.861856	1	0.435472
Mettl2	1.20584	1	0.412831	Ipo4	0.885558	1	0.362063	Rars	2.21954	0.302153	0.40916	Kdm4c	0.861856	1	1.57842
Smek2	1.20566	1	0.121061	Ltv1	0.884759	1	0.182221	Pwp1	2.21932	0.302153	0.592434	Usp21	0.861291	1	1.548
Cd79b	1.20566	1	0.189855	Fmr1	0.884544	1	0.309073	Msh6	2.2179	0.303015	0.940446	9530082P21Rik	0.860726	1	1.68962
Grn	1.20551	1	0.200388	Wdr60	0.884236	1	0.366931	Ivns1abp	2.21681	0.303623	0.375074	Med6	0.860161	1	1.03001
Ngly1	1.20235	1	0.181903	B9d2	0.88399	1	0.167737	Mrps34	2.21529	0.30456	0.387212	Gclm	0.85922	1	1.63692
Fcho2	1.20229	1	0.243658	Snx15	0.883898	1	0.17807	Arl6ip6	2.215	0.30456	0.589516	Gm2237	0.858278	1	4.86835
Nedd4	1.20095	1	0.0300402	Nfatc2	0.883867	1	0.433965	Txn2	2.21223	0.30624	0.299456	Asf1a	0.857902	1	1.01736
Gbp2	1.20071	1	0.214091	Unc45a	0.883806	1	0.349711	Nup43	2.21158	0.306355	0.864582	Rpl19	0.857713	1	0.0731928
Dhrs7	1.19959	1	0.30481	Commd7	0.883283	1	0.0579391	Hnrnpd	2.21147	0.306355	0.621067	Kcnk5	0.857713	1	0.766564
Eapp	1.19925	1	0.174899	Zfp330	0.881162	1	0.104878	Gpaa1	2.2106	0.306799	0.755442	Atox1	0.857337	1	0.463625
Tlr2	1.19925	1	0.792833	Atg14	0.880947	1	0.30346	Sumo3	2.20998	0.307043	0.273573	Nacc1	0.853947	1	1.55973
Pop7	1.19874	1	0.175	Pibf1	0.879902	1	0.364864	Smarca4	2.2094	0.307258	0.389053	Rab13	0.852818	1	1.54901
Bex4	1.19868	1	0.0826746	Eif1a	0.878734	1	0.106365	Shkbp1	2.20787	0.308219	0.76343	Sumo3	0.852253	1	0.462597
Cd44	1.19859	1	0.254616	Cep57l1	0.878673	1	0.177926	Canx	2.20707	0.308451	0.301283	Oraov1	0.852064	1	1.53781
Serinc3	1.19716	1	0.0640174	Impdh1	0.877782	1	0.316654	Pih1d1	2.20697	0.308451	0.410314	Rnf111	0.851688	1	1.51867
Lcp2	1.19646	1	0.213751	Ccdc53	0.877628	1	0.0837327	Ssr3	2.20584	0.308856	0.373543	Ddx47	0.851688	1	0.611683
Rcn2	1.19391	1	0.116845	Rpl21-ps4	0.874923	1	0.508114	Slc35b2	2.20286	0.310974	0.5952	Atp6v1a	0.850935	1	0.634233
Rpl13a-ps1	1.1933	1	0.111371	Fam98c	0.87314	1	0.207057	Cmpk1	2.20082	0.312105	0.346971	Lcor	0.848675	1	1.51867
Cdkn2d	1.19145	1	0.137567	Mia3	0.87268	1	0.286569	Baz1a	2.20021	0.312354	0.907772	Fam26f	0.848298	1	0.811921
Trim30a	1.19133	1	0.152803	Insr	0.871973	1	0.321247	Smc4	2.19835	0.3131	0.329329	Pddc1	0.846604	1	0.631308
Hoxa5	1.19057	1	0.447621	Smarce1	0.867147	1	0.0867301	Pola2	2.19675	0.313722	1.08707	Ncaph2	0.846604	1	0.759034
Hspb6	1.18993	1	1.10908	Deptor	0.866041	1	0.243836	Twistnb	2.19665	0.313722	0.289487	Dusp1	0.844909	1	0.483261
Surf1	1.18993	1	0.199147	Osbpl11	0.865948	1	0.566533	Cotl1	2.19643	0.313722	0.440171	Upf3b	0.844721	1	0.563554
Bbx	1.18699	1	0.0844086	Golga5	0.865426	1	0.22299	Atr	2.19635	0.313722	0.831261	Hist1h1e	0.844344	1	0.600029
Mgat1	1.18677	1	0.257962	Commd3	0.86478	1	0.0714379	Prep	2.1941	0.314773	1.152	Parp3	0.844156	1	1.49983
Sugp2	1.18653	1	0.120064	Churc1	0.863151	1	0.108894	Slmo2	2.19381	0.314773	0.742606	Ccdc122	0.844156	1	1.01905
Trim34a	1.18535	1	0.450516	Sdhaf3	0.862014	1	0.360383	Chtop	2.19352	0.314773	0.354127	Cryl1	0.843779	1	1.45438
Pigh	1.18422	1	0.369675	Aste1	0.861676	1	0.606687	Isyna1	2.19236	0.315462	0.582524	Eef2kmt	0.841896	1	0.917643
Btbd2	1.18292	1	1.16059	Baiap2	0.86143	1	0.398632	Cpne2	2.19134	0.316036	0.33834	Snx30	0.840201	1	1.49126
Cox4i1	1.18246	1	0.0070828	Igbp1	0.861338	1	0.0749926	Ccdc85b	2.18956	0.316981	0.433294	Fxyd2	0.840201	1	4.15888
Kat6b	1.18204	1	0.310548	Eif3m	0.859955	1	0.0572947	Ppp1r14b	2.18836	0.317517	0.589591	Dynlrb1	0.839825	1	0.348402
Hist2h4	1.1814	1	1.67844	Dync2li1	0.857619	1	0.248239	Emp3	2.18745	0.317703	0.193712	Pfdn4	0.839825	1	0.669594
Dmtf1	1.1797	1	0.301043	Wipi1	0.857158	1	0.553521	Ndufa2	2.18611	0.318545	0.190389	Cul2	0.837754	1	1.5927
Elovl1	1.17733	1	0.181229	Zfp622	0.857004	1	0.1935	Vps29	2.18567	0.318653	0.323606	Marc2	0.837377	1	0.478022
Sash3	1.1766	1	0.209973	Cdc42bpa	0.855929	1	0.228761	Myl6	2.18436	0.319223	0.0989984	Fam76a	0.837189	1	0.745805
Map3k14	1.17496	1	0.560808	Hadhb	0.854177	1	0.123392	Elovl1	2.18247	0.320295	0.393934	0610007P14Rik	0.837	1	0.425221
Klhdc8b	1.17484	1	0.485262	Rnf19a	0.853593	1	0.918555	Ssr1	2.17829	0.322993	0.375262	Rab2a	0.836624	1	0.621663
Ctsf	1.17387	1	0.228228	Kbtbd2	0.852763	1	0.527271	Cebpz	2.17822	0.322993	0.295819	Spast	0.835494	1	1.49083
Bmi1	1.17198	1	0.587516	Npc1	0.851841	1	0.462247	Unc119	2.17324	0.32634	0.54006	Akt1s1	0.834741	1	0.565568
Snhg20	1.17083	1	0.176095	Cwc22	0.851257	1	0.267887	Nop9	2.1663	0.330597	0.660107	Eif2s2	0.833799	1	0.362195
Elmo1	1.16986	1	0.113384	Ccl27a	0.850919	1	0.296345	Mycn	2.16514	0.331308	0.260463	Gulp1	0.833234	1	1.51858
Gm19590	1.16813	1	0.0587139	Arhgef5	0.850611	1	0.244745	Pdia3	2.16485	0.331308	0.250364	Rps18	0.832858	1	0.0855118
Safb	1.16737	1	0.110168	Rab8a	0.848429	1	0.114379	Naa10	2.16394	0.331778	0.324136	Uckl1	0.832858	1	0.964825
Cand1	1.16588	1	0.387437	Txlna	0.848245	1	0.113909	Npepl1	2.16369	0.331778	0.478946	Ldlrad3	0.832481	1	1.46428
Gm7967	1.16454	1	0.73984	Nav2	0.847445	1	0.232332	Trpm7	2.16169	0.332697	0.449879	Dus2	0.832481	1	0.992931
Mettl18	1.16394	1	0.551812	Larp4	0.847261	1	0.195232	Tbca	2.15609	0.336398	0.20894	Cinp	0.831916	1	1.45435
Zcchc7	1.16388	1	0.108788	Ctso	0.846923	1	0.107605	Uck2	2.15206	0.338802	0.757021	Tpgs1	0.83154	1	0.685709
Atn1-1	1.1623	1	0.738888	Map2k7	0.846892	1	0.236821	Srsf10	2.15137	0.339135	0.309956	Nbea	0.830975	1	1.46085
Slc25a26	1.1619	1	0.901387	Rpl27-ps3	0.846523	1	0.0668477	Rps6ka1	2.15035	0.339747	0.444567	Cyb5r4	0.829657	1	0.734102
Ntf5	1.15972	1	0.977857	Mapk14	0.84637	1	0.2335	Rabgap1l	2.14813	0.341378	0.433609	Pml	0.829092	1	1.00707
Kdm5b	1.15686	1	0.153663	Inpp4b	0.845448	1	0.599845	Rap1b	2.14526	0.342566	0.537171	Lyn	0.82815	1	0.981262
Map4k2	1.15686	1	0.314095	Ss18	0.844833	1	0.137163	Wbp4	2.14461	0.342818	0.359844	Ttll7	0.827209	1	1.45886
Sltm	1.15656	1	0.0864385	Mier2	0.844556	1	0.573871	Ppa2	2.14381	0.342818	0.452697	Kctd13	0.826644	1	1.46709
Fam103a1	1.15419	1	0.0720674	Yipf6	0.844464	1	0.283943	Ppp1r8	2.14355	0.342818	0.50071	Rtcb	0.826644	1	0.388171
Churc1	1.15385	1	0.105771	Ppm1k	0.843972	1	0.417192	Dhx15	2.14348	0.342818	0.413536	Arhgap17	0.826267	1	0.932125
Irgm1	1.15331	1	0.257118	Acox1	0.843204	1	0.278143	2810428I15Rik	2.14196	0.343873	0.318766	Psmd12	0.826267	1	0.450648
Etnk1	1.15221	1	0.193119	Pde2a	0.84222	1	0.517055	Psmd12	2.14097	0.344462	0.321828	Bmp4	0.826079	1	3.79172
Aim2	1.15203	1	0.440963	Sgce	0.841606	1	0.180166	Sept2	2.14028	0.344801	0.552802	Dcaf12l1	0.826079	1	1.52815
Klrb1c	1.15179	1	1.35873	1110008F13Rik	0.838594	1	0.169063	Snf8	2.13592	0.348059	0.358679	Nusap1	0.826079	1	3.81223
Tcf25	1.15106	1	0.0266864	Rbbp8	0.838471	1	0.53307	Tial1	2.13371	0.349729	0.413762	Creld2	0.824761	1	1.11365
Phc3	1.15094	1	0.283491	Angpt1	0.838471	1	0.0537036	Psmg1	2.13305	0.350041	0.394207	Vamp2	0.824572	1	1.46695
Prmt2	1.14942	1	0.479193	Rpl9	0.838409	1	0.0427378	Rpa3	2.13254	0.350226	0.459443	Fry	0.823443	1	1.43477
Taf8	1.14833	1	0.531527	R3hdm1	0.836688	1	0.0679764	Pabpc4	2.12815	0.353554	0.842608	Ankrd49	0.822313	1	1.43683
Arfrp1	1.14754	1	0.199906	Ptk2b	0.836165	1	0.144176	Gng12	2.12688	0.354157	0.55561	Gtf3c1	0.822313	1	0.954827
2010107G23Rik	1.1473	1	0.70747	Glyr1	0.834721	1	0.147943	Ssna1	2.1248	0.35526	0.319902	Mtap	0.821748	1	0.711202
Emc3	1.14468	1	0.164818	Rpl13-ps3	0.834106	1	0.0651647	Timm17b	2.12477	0.35526	0.34652	Taf13	0.82156	1	0.950269
Slc2a1	1.14417	1	0.402984	Ubl7	0.833553	1	0.0711558	P4hb	2.12444	0.35526	0.392501	Phf14	0.821183	1	0.565018
Brdt	1.14405	1	1.09661	Ankrd17	0.833338	1	0.105332	Brca2	2.12386	0.355513	1.14269	Psmb3	0.820995	1	0.478166
Arhgap25	1.14262	1	0.204482	Tm2d1	0.831586	1	0.118469	Abcf1	2.12142	0.357144	0.3173	Pum2	0.819677	1	0.595537
Rmdn3	1.14247	1	0.428182	Disc1	0.831217	1	1.12742	Prmt3	2.12033	0.357849	0.36997	Dpm3	0.8193	1	0.421922
Rps15a	1.14222	1	0.0165965	Gcnt1	0.830971	1	0.299026	Car2	2.11935	0.358326	0.0834726	Slc22a21	0.819112	1	3.73422
Aig1	1.14128	1	0.176497	Ttc3	0.830541	1	0.0686566	Sdhc	2.11881	0.358419	0.308704	Dsg2	0.818923	1	3.62973
Setd2	1.14119	1	0.236398	Wee1	0.830233	1	0.901126	Mrpl14	2.11637	0.360063	0.28727	Mcl1	0.81817	1	0.685845
Ythdf3	1.14052	1	0.684797	0610009L18Rik	0.828359	1	0.336321	Arl6ip4	2.11528	0.360773	0.361283	Adipor2	0.817982	1	0.620396
Fscn1	1.14031	1	0.358251	Med13l	0.828174	1	0.134289	Ilf3	2.11376	0.361875	0.43315	B3gnt8	0.817794	1	1.42995
Tm9sf2	1.14025	1	0.229085	Ebag9	0.82676	1	0.343118	Pdk3	2.11227	0.362947	0.389041	Mrpl39	0.817229	1	0.944548
Slc35a5	1.14019	1	1.02471	Kdm6a	0.826453	1	0.274439	Larp4b	2.11139	0.363466	0.399178	Psmf1	0.816475	1	0.959545
Ttc14	1.13946	1	0.0555192	Gpalpp1	0.826084	1	0.24588	Clspn	2.10921	0.364635	2.14938	Uba3	0.816475	1	0.948618
Pik3r4	1.13931	1	0.720776	Gm5148	0.825439	1	0.362813	Pold1	2.10805	0.365418	1.24262	March7	0.816475	1	0.654939
Clip1	1.13782	1	0.155251	Tbc1d22a	0.825346	1	0.409342	Igfbp4	2.10104	0.369745	0.339819	1810058I24Rik	0.815722	1	0.483125
Armt1	1.13746	1	0.428696	Dtx3	0.825346	1	0.205086	Mrgbp	2.10078	0.369745	0.69803	Trap1	0.815534	1	0.880584
Chrac1	1.13633	1	0.0739082	Sucla2	0.825131	1	0.153418	Arpc1b	2.0998	0.369745	0.0765994	Avl9	0.815346	1	0.46325
Nkap	1.13603	1	0.208287	Acot13	0.824762	1	0.108817	Haus4	2.09977	0.369745	0.459127	Dcaf7	0.814216	1	0.931103
Rnf6	1.13494	1	0.192585	Fbxo33	0.823748	1	0.557342	Lsm1	2.09878	0.370373	0.321736	Bmi1	0.813651	1	1.42705
C230037L18Rik	1.13263	1	0.584455	Commd1	0.823256	1	0.0995451	Phlda2	2.09799	0.370536	0.460004	Snhg12	0.813274	1	0.547698
Hid1	1.13163	1	0.609211	Camk1	0.823072	1	0.0981639	Tceb3	2.09744	0.370536	0.436368	Tubgcp4	0.811015	1	1.41913
Ubfd1	1.13084	1	0.22935	4930481A15Rik	0.823072	1	0.23772	Cenph	2.09744	0.370536	2.61762	Larp7	0.80819	1	0.579441
Rhog	1.12929	1	0.336672	Tbc1d10c	0.822519	1	0.0934566	Nt5c	2.09588	0.37153	0.37449	Dync1h1	0.807814	1	1.05206
Tbk1	1.12923	1	0.346465	mt-Co1	0.822304	1	0.0217385	Znhit6	2.09577	0.37153	0.353482	Gmfb	0.80706	1	0.926814
Cd9	1.12895	1	0.051958	Tmbim1	0.821843	1	0.143963	Stip1	2.09541	0.371597	0.384272	Ell	0.806872	1	1.40781
Itch	1.12838	1	0.180104	Dhx9	0.821351	1	0.148003	Mrpl19	2.09504	0.371663	0.401706	Serpinb9	0.806684	1	0.962058
Jam2	1.12631	1	0.669845	5033430I15Rik	0.821013	1	1.04881	Uqcrc1	2.0941	0.371996	0.290244	Phactr2	0.806495	1	0.94687
Gbp9	1.12607	1	0.747216	Pcmtd1	0.819046	1	0.0771102	Tbxa2r	2.09297	0.372529	0.891798	Fars2	0.805931	1	0.896809
Pbx1	1.12546	1	0.061346	E130311K13Rik	0.818247	1	0.328578	Fbxl6	2.09293	0.372529	0.415299	Otud5	0.805742	1	1.38237
Tpi1	1.12479	1	0.0100753	Tmem30a	0.817232	1	0.115498	Runx3	2.08498	0.379061	1.63422	Rpl3	0.804236	1	0.0949433
Insig2	1.12349	1	0.252909	C1rl	0.817171	1	0.200995	Cdca7l	2.08403	0.379669	0.380479	Rilpl1	0.803859	1	1.38188
Hoxb5	1.12318	1	0.382056	Gorasp2	0.816771	1	0.260789	Cct5	2.08236	0.380955	0.168183	Mcph1	0.803106	1	1.39349
Znrf1	1.12185	1	0.344948	Map3k4	0.816525	1	0.161633	Casp2	2.07818	0.384321	0.551291	Ndn	0.802729	1	0.548101
Mlx	1.12166	1	0.295016	Dennd1c	0.816341	1	0.185351	Tmem70	2.07404	0.387576	0.349493	Thsd4	0.802541	1	3.26367
Atp6v1a	1.12084	1	0.193244	Cdc73	0.816156	1	0.346453	Nrros	2.07386	0.387576	0.311616	Vps53	0.801788	1	0.912294
Dstyk	1.12066	1	0.346874	Cnih4	0.814743	1	0.0963658	Tacstd2	2.07229	0.388232	0.94844	Tlcd2	0.801035	1	0.993933
Rheb	1.12036	1	0.0345727	Rpp40	0.814681	1	0.404472	Wtap	2.07171	0.388509	0.507571	Ptpn6	0.80047	1	0.411903
Gm20342	1.11887	1	0.462227	Cox20	0.813298	1	0.0879734	Paics	2.07128	0.388648	0.318225	H2-T23	0.799905	1	0.476993
Eef1g	1.1186	1	0.0339191	Prepl	0.812468	1	1.01292	1700025G04Rik	2.0696	0.389959	0.555	Tgtp1	0.799528	1	3.34215
Supt3	1.11729	1	0.213526	Hif1a	0.811669	1	0.216566	Hdlbp	2.06906	0.390202	0.352533	Rae1	0.799152	1	0.51551
Ctnnal1	1.11696	1	0.249603	Pcdh7	0.811116	1	0.520115	Elof1	2.06368	0.394237	0.336476	Tmem143	0.798775	1	1.38392
Thtpa	1.11517	1	0.528926	Sart1	0.810747	1	0.262183	Shmt2	2.06354	0.394237	0.548334	Tmem29	0.79821	1	0.887311
Ccnt2	1.11438	1	0.199919	Myof	0.81044	1	0.229502	Smarcad1	2.06296	0.394237	0.428069	Gm26619	0.798022	1	3.36551
Ak1	1.11432	1	0.461104	Pip4k2c	0.809702	1	0.442961	Mmadhc	2.06034	0.396332	0.416369	Vipas39	0.797834	1	1.39082
Il15	1.11416	1	0.222516	Brd1	0.809702	1	0.297422	Sarnp	2.05696	0.399036	0.326151	Uqcc2	0.797645	1	0.372701
Mthfsd	1.11255	1	0.366473	Zranb1	0.809548	1	0.173616	Nvl	2.05656	0.399144	0.442273	H3f3b	0.796327	1	0.158841
Psmb8	1.11094	1	0.0144367	Lag3	0.807335	1	0.584103	Hnrnpk	2.05616	0.399191	0.117057	Klhl7	0.795951	1	1.56018
Mgea5	1.11034	1	0.21626	Nxt1	0.807243	1	0.0917048	Mecr	2.05576	0.399191	0.900259	Tmub2	0.794632	1	0.914659
Sec24c	1.11016	1	0.419411	Slc25a4	0.807089	1	0.0303791	Slc35c2	2.05554	0.399191	0.493342	Klf2	0.794068	1	1.49415
Chchd5	1.10937	1	0.269884	Ndufb3	0.806075	1	0.089921	2700094K13Rik	2.05242	0.401487	0.282768	Tcf3	0.792373	1	0.731567
Sesn3	1.10915	1	0.253257	Fam3a	0.80503	1	0.345759	Cdc37	2.05154	0.402056	0.230802	Tmem101	0.791996	1	0.95216
Shc1	1.10891	1	0.300185	BC049715	0.804661	1	1.04995	Eif4g2	2.04976	0.402951	0.270843	Cers5	0.791808	1	0.721647
Pef1	1.10718	1	0.214004	Cope	0.80417	1	0.0696914	Ndufa13	2.049	0.403416	0.180043	Arf1	0.791431	1	0.510871
Mum1	1.10545	1	0.167632	Kif18a	0.804077	1	1.11085	Mki67	2.04562	0.406159	3.77501	Atp5g1	0.790678	1	0.2304
Rpl23a	1.10539	1	0.0415532	Ccndbp1	0.803893	1	0.112856	Anapc13	2.04275	0.408135	0.283971	Wdr7	0.79049	1	3.18538
Gm973	1.10429	1	0.410136	Auts2	0.803555	1	0.52485	Psmc3ip	2.04181	0.408502	1.15758	Upf2	0.78936	1	0.605482
Skint3	1.10278	1	0.978281	Sp1	0.802233	1	0.341346	Snrpg	2.03763	0.41235	0.299027	Lat	0.789172	1	0.753443
Cept1	1.10238	1	0.259775	Zc3h13	0.801803	1	0.0738606	2810417H13Rik	2.03705	0.412576	2.62208	Ankrd54	0.788983	1	0.932004
Aak1	1.10208	1	0.450425	Pkd1	0.801649	1	0.57982	Dctn3	2.03345	0.415656	0.278531	Cnot10	0.788419	1	1.35254
Cyp26b1	1.10074	1	0.815251	Mcee	0.801065	1	0.105607	Esyt1	2.03261	0.416065	0.725568	Gins2	0.787665	1	1.27632
Zfp329	1.09877	1	0.28751	Ell2	0.801034	1	0.568077	Acap1	2.03189	0.416075	0.474403	Osgin1	0.786159	1	1.42802
Mpdu1	1.09859	1	0.264678	Ccdc97	0.800235	1	0.351627	Spcs3	2.03156	0.416117	0.623923	Ehmt1	0.785971	1	0.635806
Med4	1.095	1	0.16839	Actg1	0.800205	1	0.068715	Ccnb2	2.03058	0.416437	3.90807	Ccdc127	0.785782	1	0.887714
4931406P16Rik	1.09415	1	0.36344	RP23-218K15.3	0.799805	1	0.513332	Asna1	2.03003	0.416437	0.687503	Vapa	0.785594	1	0.683228
Ddx55	1.09327	1	0.211614	Mitf	0.798975	1	0.539369	Gm5611	2.02981	0.416437	0.54841	Rpl7a-ps5	0.785594	1	0.888983
Sumf2	1.09224	1	0.372096	Arhgap29	0.798453	1	0.545777	Mphosph8	2.02683	0.418851	0.326886	Hnrnpm	0.784652	1	0.296797
Mylk	1.09075	1	0.428453	Mef2d	0.798391	1	0.222692	Rsl24d1	2.02629	0.419113	0.263806	Ms4a6b	0.784276	1	1.20557
Ubap1	1.09033	1	0.318049	Inpp5k	0.79793	1	0.126995	Fli1	2.02454	0.420582	0.266248	Ddx19b	0.784088	1	3.34432
Dcaf7	1.08969	1	0.290884	Ngdn	0.797746	1	0.0746032	Tceb1	2.02189	0.422112	0.260097	Copb1	0.783711	1	0.456685
Acot7	1.08875	1	0.16189	Golim4	0.796824	1	0.144337	Nt5c3b	2.02062	0.423111	0.430265	Ap4s1	0.783523	1	0.606497
Ftsj2	1.08708	1	0.478685	Pi4k2b	0.794488	1	0.448192	Surf4	2.0168	0.426697	0.482729	Ptprs	0.783146	1	1.33126
Hmga2	1.08692	1	0.398949	Tmem258	0.794457	1	0.0663513	Bdp1	2.01608	0.427149	0.368952	Tbc1d10c	0.782581	1	0.716226
Dopey1	1.0865	1	0.437558	Zcchc8	0.793443	1	0.259454	Ezr	2.01506	0.427867	0.444754	Xrcc2	0.782205	1	3.01643
Aldh2	1.0848	1	0.0231636	Rnf125	0.793197	1	0.151937	Spcs1	2.01361	0.428803	0.223362	Vezf1	0.782016	1	0.529005
Abcg3	1.08477	1	0.313358	Serpinh1	0.793105	1	0.523436	Rgs19	2.01266	0.42948	0.387238	Rpl26	0.782016	1	0.0683661
Traf1	1.0844	1	0.424951	Tnrc18	0.791445	1	0.374149	Rnf168	2.00866	0.432713	0.523854	Chmp2b	0.781828	1	0.544744
Gm20045	1.08434	1	1.23852	Serinc3	0.790769	1	0.0371928	Sdhb	2.00866	0.432713	0.270416	Lsm6	0.781263	1	0.3733
Mboat2	1.08328	1	0.556492	Thap1	0.789785	1	0.672211	Rnmtl1	2.00739	0.433515	0.68069	Naa40	0.780322	1	1.33771
Serhl	1.08279	1	0.272754	Ddx25	0.789355	1	0.830059	Mthfd1l	2.00732	0.433515	1.35835	Gimap4	0.780133	1	1.25069
Vti1b	1.08176	1	0.147621	Mrpl57	0.789078	1	0.0820883	Gm14698	2.0063	0.434274	0.463487	Cfl1	0.779568	1	0.3067
6330403K07Rik	1.08088	1	1.23173	Sptlc2	0.787542	1	0.17021	Psmc4	2.00503	0.434767	0.329144	Nfatc2ip	0.77825	1	1.27637
Pyurf	1.08082	1	0.149191	Dusp18	0.78665	1	0.955091	Chaf1a	2.00441	0.434767	2.30743	Thrap3	0.777874	1	0.494563
Bmyc	1.08061	1	0.0666764	Ofd1	0.785974	1	0.286254	Atf6b	2.00394	0.434963	0.554332	Gm4841	0.777874	1	3.18066
Igf2bp2	1.0803	1	0.352495	Cxx1a	0.78539	1	0.207982	Atg5	2.00212	0.436006	0.404623	Sfpq	0.777685	1	0.410124
Rab32	1.08024	1	0.289459	Pdcl3	0.785236	1	0.0729864	Gfer	2.00085	0.436995	0.503623	BC147527	0.77712	1	3.09245
2210016L21Rik	1.08018	1	0.102105	Ccser2	0.785083	1	0.188752	Pus1	1.99936	0.43825	0.400194	Polr3g	0.77712	1	1.27143
Cd38	1.07842	1	0.848374	Htra2	0.783822	1	0.119531	Ube2e1	1.99856	0.438789	0.235718	Capn7	0.776744	1	1.33092
Anapc11	1.07651	1	0.0627621	Tfdp2	0.782624	1	0.126849	Cops7a	1.9974	0.439707	0.339089	Smg1	0.776744	1	0.893117
Hexa	1.07608	1	0.0931607	Paf1	0.782316	1	0.263685	Luc7l	1.99159	0.444846	0.333919	Zrsr2	0.775802	1	0.547161
Stat6	1.07514	1	0.443436	Gskip	0.781917	1	0.311358	Rnps1	1.99151	0.444846	0.294764	Rnf7	0.774672	1	0.41601
Irf2	1.07162	1	0.0638276	Arhgap32	0.781364	1	0.329132	Tomm70a	1.99057	0.445392	0.410095	Uqcrc1	0.774672	1	0.460593
Padi4	1.07056	1	0.229635	Rpl26	0.780995	1	0.00988799	Pdia5	1.98901	0.446447	1.08496	Haus2	0.774108	1	1.44971
Nfat5	1.06946	1	0.130561	Cstb	0.780749	1	0.0894269	Psmc5	1.98795	0.447263	0.35293	Lsm12	0.773919	1	0.562693
Atp6v1d	1.06861	1	0.105555	Timp2	0.779888	1	0.439127	Mtch2	1.98712	0.44741	0.296855	Rexo1	0.773543	1	0.572931
Ccdc12	1.06819	1	0.037356	Ddah2	0.779489	1	0.115351	Icam2	1.98635	0.447708	0.395287	Gm16586	0.773354	1	1.31157
Pls3	1.06594	1	0.873619	Man2a2	0.779458	1	0.262501	Ehmt1	1.98537	0.447708	0.356543	Rpl9-ps1	0.772978	1	2.96831
Mtch2	1.06561	1	0.090065	Mctp1	0.778659	1	0.134392	Mettl1	1.98519	0.447708	0.323628	Pafah2	0.77279	1	0.907908
Eri1	1.06354	1	0.246376	Rabep2	0.778136	1	0.237982	Spc24	1.98501	0.447708	2.09633	Tmem126b	0.77279	1	1.15343
Sdha	1.06348	1	0.0418428	Casp8	0.775493	1	0.100419	Immt	1.98337	0.448525	0.300255	Ddx21	0.772413	1	0.519496
Ctnnb1	1.06251	1	0.117372	Topors	0.774202	1	0.132191	Khk	1.98312	0.448525	0.256564	Lamtor2	0.772225	1	0.345223
Nt5c2	1.06154	1	0.232433	Ctdnep1	0.774049	1	0.294775	Uba1	1.98268	0.448692	0.397562	Lgals8	0.771095	1	0.956908
Cd151	1.05959	1	0.277623	Ncoa6	0.773895	1	0.331065	Rbx1	1.9809	0.450283	0.159084	Golga5	0.771095	1	1.05165
Cfl2	1.05929	1	0.210306	Sp140	0.772881	1	0.12176	Bcl2l12	1.98039	0.450527	0.430332	1700056E22Rik	0.770153	1	2.82043
Ap4m1	1.05525	1	0.254551	Zc3h18	0.770452	1	0.12221	Hnrnph1	1.97727	0.452665	0.287249	Trmt10c	0.769965	1	0.720421
Nadk2	1.05255	1	0.413351	2410004B18Rik	0.768701	1	0.171531	Cnih1	1.97621	0.453195	0.378226	Pfkl	0.769777	1	0.547305
Sgta	1.051	1	0.162322	Mamdc2	0.768608	1	0.212801	Mb21d1	1.97396	0.455007	0.93574	Sdcbp	0.769588	1	0.328723
Acp6	1.051	1	0.22835	Supt20	0.76784	1	0.127977	Brix1	1.97323	0.455487	0.348735	Utp14a	0.7694	1	0.634741
Ccl25	1.05088	1	0.379741	Il27ra	0.767256	1	0.299959	Tprkb	1.97076	0.457839	0.476946	2410016O06Rik	0.7694	1	2.82072
Cttn	1.05076	1	0.327303	Slc48a1	0.766549	1	0.068333	Tmem261	1.96658	0.461499	0.296538	Arhgef2	0.767705	1	0.554431
Golph3l	1.04997	1	0.326634	Nkiras2	0.765443	1	0.279688	Romo1	1.96629	0.461499	0.273534	Rprm	0.767705	1	2.9571
D730003I15Rik	1.04975	1	0.438746	Snrpa	0.764705	1	0.0844522	Impa1	1.96626	0.461499	0.349844	Actr3b	0.766952	1	2.82869
Alkbh3	1.04869	1	0.356895	Tmem33	0.764551	1	0.0966402	Icam4	1.9631	0.464325	1.00379	H2afv	0.766575	1	0.353132
Nfic	1.04839	1	0.067329	Pomgnt2	0.764059	1	0.362854	Erdr1	1.9591	0.468078	0.876716	Sec13	0.766387	1	0.770673
Arf5	1.04793	1	0.0617468	Clta	0.763937	1	0.0540377	Jtb	1.95826	0.468689	0.309578	Aida	0.766199	1	0.923991
Myo5c	1.04708	1	0.829899	Sp100	0.763598	1	0.0901096	Srsf4	1.95764	0.468708	0.375392	Ggps1	0.765446	1	1.29184
Alg2	1.04587	1	0.381861	Pnpla2	0.76326	1	0.122369	Pdia4	1.95714	0.468708	0.40105	Ddx5	0.765257	1	0.196762
Meis2	1.04374	1	1.43904	Tox	0.763137	1	0.246409	Timm22	1.95608	0.469032	0.356609	Mga	0.764881	1	0.51883
Hadhb	1.0435	1	0.164904	Mipep	0.76157	1	0.630231	Qtrt1	1.95601	0.469032	0.452304	Ino80e	0.764692	1	0.695703
Rbm6	1.04332	1	0.128101	Ltbr	0.761047	1	0.330919	Spcs2	1.95554	0.469246	0.211311	Fam177a	0.764692	1	0.852836
Atad1	1.0418	1	0.216833	Metap2	0.760955	1	0.0387199	Galnt1	1.9551	0.469421	0.586396	Fech	0.763563	1	1.30968
Susd3	1.04083	1	0.285141	Gbp3	0.759849	1	0.174183	Setdb1	1.95347	0.470625	0.600753	Ints3	0.762056	1	1.25859
Mllt10	1.04046	1	0.0727112	Prkch	0.759756	1	0.201656	Chchd6	1.95241	0.471096	0.422431	Plekha8	0.761868	1	2.81283
Zfp397	1.03985	1	0.240594	Fam76a	0.759449	1	0.182476	Khsrp	1.95219	0.471096	0.905469	Zbtb4	0.76168	1	1.24003
Zfx	1.03891	1	0.208977	S100a6	0.759172	1	0.0784142	Stoml2	1.94856	0.473579	0.315702	Med15	0.76168	1	1.28113
Aifm2	1.03876	1	0.880577	Gm26724	0.758742	1	0.113329	Ttc13	1.94856	0.473579	1.24202	Hsp90aa1	0.761115	1	0.253694
Cct4	1.03794	1	0.0680083	Sh3glb1	0.75865	1	0.106976	Mtap	1.94569	0.475632	0.418975	Mocs2	0.760926	1	0.596758
Ptger4	1.03739	1	0.347767	Ncl	0.757912	1	0.0512349	Cdca8	1.94544	0.475632	1.95907	M1ap	0.760926	1	2.80823
Ctsz	1.03709	1	0.118885	Dfna5	0.756498	1	0.177563	Eno1	1.94482	0.475748	0.282849	Ccdc107	0.760362	1	0.526702
Rab22a	1.03648	1	0.466747	Nr4a3	0.75616	1	2.95456	Cd47	1.9438	0.476409	0.16388	Hmbox1	0.759797	1	1.24661
Chd2	1.03569	1	0.0860101	Cd274	0.755761	1	0.592908	Nacc1	1.94086	0.478457	0.888041	Actr3	0.75942	1	0.441257
Fsd1l	1.03503	1	0.601945	Cpne8	0.754962	1	0.195476	Bag2	1.93969	0.479098	0.490932	Wdr13	0.75942	1	1.26344
Ccs	1.035	1	0.152871	Rit1	0.754562	1	0.131312	Prdx3	1.93813	0.479966	0.297387	Nosip	0.758855	1	0.956794
Trp53inp1	1.03487	1	0.937207	Clpb	0.752995	1	0.214247	Phb	1.93751	0.48035	0.327616	Wdr60	0.757914	1	1.24126
Rpp14	1.03481	1	0.14199	Zfp579	0.752779	1	0.232184	Hdac2	1.93581	0.48134	0.354112	Nfatc1	0.756407	1	1.25283
Phf21a	1.03284	1	0.196251	Ppan	0.752288	1	0.0964657	Ywhae	1.9353	0.481603	0.182347	AW011738	0.756407	1	2.80264
Rnf167	1.03211	1	0.228635	Rpl37a	0.751519	1	0.00634098	Nde1	1.93464	0.482029	0.607077	Tnfsf10	0.756031	1	1.25624
Xrn1	1.03156	1	0.22677	Ciz1	0.750136	1	0.179511	Rprd1b	1.9333	0.483226	0.42332	Cutc	0.755089	1	0.815281
Chrnb1	1.03111	1	0.55898	Cbx7	0.750013	1	0.364736	Tmem167	1.93279	0.48349	0.314648	Igf1r	0.754524	1	0.510123
1810032O08Rik	1.02992	1	0.374737	Plin3	0.749429	1	0.12135	Crlf2	1.93134	0.484548	0.266447	Clasrp	0.754524	1	1.27241
Syf2	1.02895	1	0.038598	Rab1b	0.748384	1	0.269736	Mapk1	1.9313	0.484548	0.380558	Stk17b	0.753771	1	0.963148
Gimap8	1.02765	1	0.468958	Cyp2j6	0.747708	1	0.164567	D030056L22Rik	1.92756	0.48845	0.443988	Zfp931	0.753394	1	1.21301
Tsr2	1.02713	1	0.283786	Tet2	0.747401	1	0.378974	Pelp1	1.9261	0.489476	0.541509	Snx4	0.752641	1	0.681627
Nbeal1	1.02661	1	0.285774	Tuba1a	0.747124	1	0.319353	Kpnb1	1.92	0.49579	0.471872	Itgb3	0.752641	1	2.73876
Prex2	1.02661	1	0.318105	Gcnt2	0.747063	1	0.0574224	Mri1	1.91927	0.495935	0.336232	Ndufb9	0.752641	1	0.262861
Gsdmd	1.0261	1	0.234272	Phkg2	0.746817	1	0.196517	Pfdn4	1.91905	0.495935	0.363536	Unc93b1	0.752076	1	0.876928
Ufd1l	1.02576	1	0.227885	2310033P09Rik	0.745249	1	0.100136	Sac3d1	1.91564	0.498286	0.652515	Ap3m2	0.751511	1	2.71477
Tnfrsf13b	1.02431	1	0.159505	Mapre3	0.744604	1	0.73134	Top1	1.91531	0.49835	0.204023	Hoxa7	0.750946	1	0.612543
Rnf216	1.02339	1	0.127039	Trim30a	0.744296	1	0.0781965	Rpp25l	1.91208	0.50144	0.331791	Eif1	0.750758	1	0.134544
Rrp1	1.02309	1	0.0275151	Exoc1	0.743835	1	0.317113	Nup54	1.90993	0.503285	0.529013	Car1	0.748875	1	2.46659
Nfkbie	1.02248	1	0.637602	Kmt2a	0.743774	1	0.0698436	1110001J03Rik	1.90993	0.503285	0.276308	Ttc32	0.748875	1	0.725269
Gm42418	1.02224	1	0.144455	Uba6	0.74279	1	0.21776	Cenpf	1.90575	0.506866	2.66233	Thoc5	0.747557	1	1.25752
Tmem208	1.02215	1	0.107118	Arfip2	0.741254	1	0.215984	Tmem205	1.90397	0.507614	0.312398	CR974586.5	0.747369	1	2.75373
2410015M20Rik	1.022	1	0.0399884	Gab1	0.7411	1	0.628118	Mtx2	1.90375	0.507614	0.332603	Lyl1	0.74718	1	0.253459
Apbb1	1.02154	1	0.600348	Rap2c	0.739194	1	0.545778	Nom1	1.90292	0.508271	0.379466	Irak1	0.74718	1	0.640544
Arrdc1	1.02127	1	0.240428	Psmd7	0.738979	1	0.0472119	Hmces	1.90197	0.509055	0.600478	Tceanc2	0.746616	1	1.23468
Ilvbl	1.02075	1	0.278976	Nefh	0.738733	1	0.141112	Orc6	1.90085	0.510053	0.464699	Man2c1	0.746239	1	1.21792
Mbtps1	1.02033	1	0.355309	Tax1bp3	0.73861	1	0.254826	Reep5	1.89939	0.511433	0.323682	Ophn1	0.745109	1	1.23805
Slc2a3	1.01911	1	0.172114	Spns2	0.737903	1	0.128418	Csrp1	1.89827	0.512118	0.364535	Sfi1	0.744168	1	1.23689
Pigx	1.01911	1	0.115092	Rab33b	0.737412	1	0.570996	Ankrd9	1.8975	0.512379	1.53924	Rpl15	0.743979	1	0.141606
Ikbkb	1.01838	1	0.141246	Gm16286	0.736828	1	0.0554064	Gng5	1.89718	0.512446	0.101085	Bsn	0.743414	1	2.67822
Ube3b	1.01808	1	0.584723	Ccdc28a	0.736674	1	0.214278	Dhx29	1.89554	0.514045	0.827929	Ubxn6	0.743038	1	0.493945
Nipbl	1.01729	1	0.075241	Nsdhl	0.73649	1	0.300682	Alad	1.88853	0.521361	0.421814	Spcs2	0.742661	1	0.241482
Lzts2	1.01708	1	0.131201	Il18	0.735905	1	0.172994	Klk8	1.88577	0.524001	0.354335	Ubb	0.742285	1	0.139253
Mpp1	1.01656	1	0.204879	Bptf	0.734154	1	0.0755916	Cdc5l	1.88468	0.524404	0.294872	Map3k5	0.74172	1	2.6257
Aip	1.01419	1	0.145402	Mtpap	0.734092	1	0.201183	Ncaph2	1.88399	0.524516	0.409503	mt-Nd6	0.74172	1	1.22828
Nupr1l	1.01356	1	0.583277	Btk	0.733324	1	0.25568	Sms	1.88301	0.525365	0.302482	Sympk	0.741343	1	1.24244
Gngt2	1.01356	1	0.298339	Atp5j2	0.733078	1	0.0246832	Dus1l	1.88079	0.527369	0.503308	Rabac1	0.740966	1	0.408582
Bcs1l	1.01356	1	0.284893	Pold4	0.732986	1	0.0795063	Cib1	1.87683	0.531475	0.430965	Arl6ip5	0.740966	1	0.371102
Zfp398	1.01349	1	0.270727	Wdr45	0.732678	1	0.14503	Ptger3	1.87628	0.531807	0.5694	Aifm1	0.740213	1	0.820051
Igf1	1.01185	1	0.629043	Chkb	0.732248	1	0.251356	Ccdc86	1.8741	0.534113	0.388372	Uhrf1bp1	0.740025	1	2.67209
Slc35b3	1.01179	1	0.429697	Fbxo8	0.730527	1	0.346108	Prpf4	1.87283	0.534718	0.500609	U2surp	0.739837	1	0.31911
Gm2a	1.01179	1	0.173016	Ebi3	0.73025	1	0.124006	Dlst	1.87279	0.534718	0.711665	Rhoh	0.739837	1	0.423048
D430042O09Rik	1.0117	1	0.183711	Epsti1	0.730066	1	0.0751703	Aars	1.87181	0.535255	1.06449	Gm15441	0.739648	1	2.65164
Rgp1	1.01107	1	0.457458	Ccdc191	0.728959	1	0.176113	Ide	1.86923	0.538057	0.412886	Rab10	0.739648	1	0.419517
Adss	1.01097	1	0.06623	Tmem181a	0.728222	1	0.425738	Man1a2	1.86887	0.538172	0.307116	Rab1a	0.739648	1	0.405798
Cog6	1.01052	1	0.435604	Tmem57	0.728006	1	0.184526	Gstm5	1.86738	0.539657	0.32844	Icmt	0.738707	1	2.57869
Rbm18	1.00949	1	0.194814	Bex1	0.727299	1	0.0826476	Pop1	1.86673	0.5398	1.21773	Dhx32	0.738707	1	1.24036
Eri3	1.00715	1	0.29855	Eef1e1	0.727299	1	0.0978652	Apitd1	1.86553	0.540934	1.41744	Kars	0.738142	1	0.753115
Zfp386	1.00687	1	0.20815	Pigp	0.726715	1	0.0509648	Dpcd	1.86193	0.545007	0.440844	Snd1	0.737954	1	0.637454
Cnot1	1.00648	1	0.237982	Ttc32	0.725824	1	0.126854	Adsl	1.86106	0.545474	0.431039	Agbl5	0.737765	1	2.55579
Slc16a9	1.00605	1	0.754313	Cd86	0.725425	1	0.640232	Armc1	1.86095	0.545474	0.428999	Plpp5	0.737577	1	1.21396
Pdlim7	1.00445	1	0.300742	Polb	0.723826	1	0.146775	Dna2	1.86069	0.545474	1.71084	Vpreb1	0.737577	1	2.51351
Safb2	1.00314	1	0.0853868	Mpped2	0.723089	1	0.241175	Sod1	1.86048	0.545474	0.273655	Tmem106b	0.737201	1	1.21768
Pnkd	1.00265	1	0.0895104	Bcl10	0.722781	1	0.114048	Noc3l	1.85968	0.546127	0.640551	Magi2	0.736824	1	2.5659
Tmppe	1.00205	1	0.635949	Ints12	0.722351	1	0.465848	Gna15	1.85909	0.546317	0.459147	Bmp1	0.736636	1	2.42009
A130014A01Rik	1.00144	1	0.82181	March2	0.722167	1	0.11923	Tgfb1	1.85899	0.546317	0.731238	Tiprl	0.735506	1	0.489816
C530008M17Rik	1.0012	1	0.32192	Sqstm1	0.721029	1	0.121107	Fam104a	1.8576	0.547357	0.279962	Zfp667	0.735317	1	1.18582
Cyld	1.00117	1	0.287211	Rbbp4	0.720107	1	0.0668133	Wdr73	1.85633	0.548593	0.429551	Rnft1	0.735317	1	0.872217
Ift20	1.00041	1	0.0416717	Zfp260	0.719155	1	0.18911	Sgf29	1.85561	0.54916	0.335785	Acat2	0.73287	1	0.660458
Capn2	1.00004	1	0.497715	Jag2	0.719155	1	2.28263	Alkbh1	1.85441	0.550249	0.279568	Mmachc	0.73287	1	2.60908
Ahcyl1	0.999768	1	0.333162	Dpp4	0.718171	1	0.238606	Atp13a3	1.85419	0.550249	1.06493	Polr3h	0.73174	1	0.668496
Asl	0.999282	1	0.248873	Runx1	0.717187	1	0.0790167	Xrcc6	1.8539	0.550278	0.422206	Dtd1	0.731363	1	0.340895
Snx27	0.999191	1	0.277202	Top1	0.715589	1	0.0703512	Rnaseh1	1.85321	0.550471	0.561357	Rbakdn	0.731363	1	2.53233
Parp9	0.998857	1	0.2668	Gm16152	0.715528	1	0.203147	Rnf126	1.85208	0.551204	1.2259	Mknk2	0.731363	1	0.890945
Vwa1	0.998311	1	0.839365	Ctsc	0.715374	1	0.0965678	Irak1	1.85066	0.552628	0.406937	Smu1	0.73061	1	0.464511
Cd200r1	0.997977	1	0.379358	Ttc39b	0.715159	1	0.347792	Nfkbib	1.84678	0.557129	0.568429	Polr2i	0.73061	1	0.544763
Hnrnpul1	0.997886	1	0.166056	AU019823	0.715097	1	0.205355	Me2	1.8447	0.559383	0.690227	Sdf2l1	0.73061	1	0.715051
Fam109b	0.997734	1	0.560407	Irf2bpl	0.715005	1	0.387636	Akip1	1.84256	0.561065	0.573328	Edem1	0.730422	1	2.53142
Ccdc53	0.997248	1	0.0985504	Peak1	0.71479	1	0.380169	Btk	1.841	0.562692	0.591276	Ccdc97	0.730422	1	1.20449
Mamdc2	0.996762	1	0.414461	Cmtm8	0.714698	1	0.290364	Pitpna	1.84031	0.563072	0.493335	Atat1	0.730422	1	0.789295
Hoxa7	0.996155	1	0.133263	Cnrip1	0.713899	1	0.169026	Gtf2f1	1.84016	0.563072	0.413158	Arhgap32	0.730422	1	1.1419
Srek1	0.993907	1	0.125006	Rnf115	0.712085	1	0.117004	Gm11713	1.83864	0.564643	0.747962	Tax1bp1	0.730233	1	0.286995
Phactr1	0.993452	1	0.465665	Rbm18	0.711409	1	0.166324	Abhd14a	1.83805	0.564643	0.327269	Fam60a	0.729857	1	0.600988
Adprh	0.99327	1	0.138535	Tmc6	0.711378	1	0.287506	2310035C23Rik	1.83802	0.564643	0.597628	Rnf135	0.729668	1	1.19788
Ndufs7	0.992996	1	0.0369039	Tmx3	0.711225	1	0.239553	Psmc1	1.83758	0.564643	0.327179	Fam73b	0.729292	1	2.44552
Zbp1	0.992207	1	0.486296	Hcls1	0.711071	1	0.058153	U2surp	1.83758	0.564643	0.260941	Cnpy4	0.729104	1	0.965481
Pfdn1	0.991903	1	0.0448164	Fam214a	0.710702	1	0.54845	Orc2	1.83707	0.564921	0.733354	Klhl11	0.728915	1	2.45615
Mknk2	0.989109	1	0.251536	Padi4	0.710333	1	0.135404	Pycard	1.83656	0.564921	0.274419	Zdhhc5	0.728539	1	2.60226
Mapk1ip1	0.988836	1	0.394999	Marcks	0.709135	1	0.392733	Tada1	1.8342	0.567566	0.43557	Fbxo42	0.727221	1	2.5025
Rpl7l1	0.987591	1	0.0552644	Rabgap1	0.708889	1	0.1574	Pitpnb	1.83369	0.567721	0.355728	Pop5	0.727221	1	0.489972
Blcap	0.986771	1	0.338341	Rassf1	0.707813	1	0.106981	Srsf9	1.83239	0.568856	0.821278	Ddx3x	0.726844	1	0.47733
Acp2	0.98501	1	0.537945	Zfp180	0.707536	1	0.584818	Rrp1b	1.82777	0.573217	0.362802	Pwwp2a	0.726279	1	1.16511
Eif3k	0.984888	1	0.0523836	Tmub1	0.706368	1	0.176671	Tsta3	1.82762	0.573217	0.404828	Arhgap26	0.725714	1	2.36162
Lmo4	0.983127	1	0.260505	Phax	0.706215	1	0.069802	Camta1	1.82526	0.575892	0.410745	Psme2b	0.725149	1	1.19302
Pja2	0.982793	1	0.248914	Ube2r2	0.705047	1	0.0752554	Snhg6	1.82032	0.580603	0.312613	Snhg6	0.724396	1	0.551225
Adprm	0.982489	1	0.350333	Ndfip2	0.704955	1	0.127792	Pbrm1	1.82007	0.580603	0.300643	Mcoln1	0.724019	1	2.35988
Tmem129	0.980971	1	0.560906	Rdh11	0.704893	1	0.261744	Pfas	1.81945	0.580603	1.41553	Epn1	0.723643	1	1.17772
Snhg12	0.980242	1	0.105359	Ubr2	0.703264	1	0.138855	Usp48	1.81923	0.580603	0.355661	Kdm4b	0.723078	1	2.44172
Pttg1	0.979331	1	0.133237	Dguok	0.702711	1	0.0617212	Trim37	1.81894	0.580603	0.551645	Fuca2	0.72289	1	0.799259
Notch1	0.978359	1	0.370803	Commd2	0.701943	1	0.089559	Tcof1	1.81894	0.580603	0.308	Sirt2	0.722513	1	0.549954
4833403J16Rik	0.977084	1	0.373092	Plekhg1	0.701266	1	0.736077	Larp7	1.81734	0.58198	0.339363	Sept7	0.722325	1	0.405043
Zfp612	0.976689	1	0.679848	Rps26-ps1	0.701082	1	0.0946365	Rpf1	1.81651	0.582517	0.337316	Socs2	0.721383	1	0.42829
1110004F10Rik	0.975626	1	0.0443047	Arl5b	0.699852	1	0.579322	Cetn3	1.81545	0.583054	0.256657	Rab11a	0.72063	1	0.431137
Zkscan3	0.975444	1	0.155863	Ncor2	0.699514	1	0.160688	Txnl1	1.81516	0.583089	0.222383	Zranb2	0.720442	1	0.415623
Pdia6	0.974624	1	0.036861	Mid1ip1	0.698654	1	0.118591	Lrrfip1	1.81476	0.583265	0.275859	Tcea2	0.720442	1	2.42646
Il4ra	0.974168	1	0.478851	Higd2a	0.698346	1	0.0610123	Prpf19	1.81196	0.586539	0.317883	Mvp	0.720253	1	0.673582
Kdelr1	0.973925	1	0.0821124	Sesn3	0.698254	1	0.119545	Rpl27-ps3	1.81033	0.588318	0.277095	Nolc1	0.720065	1	0.449052
Snx10	0.973045	1	0.073873	Dlgap4	0.698193	1	0.205678	Smn1	1.80862	0.589852	0.378192	Vgll4	0.720065	1	0.173584
Ube2d2a	0.971617	1	0.0443965	Sox6	0.698162	1	0.30666	Mrpl55	1.80764	0.590785	0.337358	Fxyd5	0.720065	1	0.321246
AI837181	0.969795	1	0.624205	Hscb	0.697394	1	0.0760796	Golt1b	1.80622	0.592088	1.05496	Itpr1	0.7195	1	0.76403
Kif5b	0.969552	1	0.0551334	Smurf2	0.694812	1	0.449419	Strbp	1.80611	0.592088	0.541364	Hdac5	0.7195	1	1.17113
Pdxdc1	0.968459	1	0.278237	Flii	0.694689	1	0.140797	Pus7	1.80488	0.593357	0.597553	Ogfod2	0.719124	1	1.18236
Arid4a	0.967639	1	0.077227	Atg16l2	0.694228	1	0.31856	Dynll2	1.8035	0.594356	0.264612	Atp6v0a1	0.718747	1	2.44817
Slc25a40	0.967214	1	0.820658	Mycbp2	0.692537	1	0.0620089	Cdk1	1.80324	0.594356	0.993759	Prkag1	0.718747	1	0.641696
Mier1	0.966971	1	0.0619595	Med10	0.69054	1	0.0820423	Slc1a5	1.80306	0.594356	0.404128	Ppp1ca	0.717994	1	0.301308
Kansl1l	0.966576	1	0.272428	Arel1	0.689033	1	0.930976	Pno1	1.80244	0.59482	0.7051	Fam175b	0.717805	1	0.886488
D3Ertd751e	0.96609	1	0.260997	Ip6k1	0.688234	1	0.279786	Msh2	1.80204	0.594999	0.333057	Grwd1	0.717617	1	0.789726
Cul9	0.96524	1	0.412226	Nr2c1	0.687896	1	0.704032	Sft2d1	1.80161	0.595226	0.527725	Slc25a1	0.717429	1	0.788998
Vsir	0.964572	1	0.542834	G430095P16Rik	0.687374	1	0.114147	Ppih	1.79877	0.597984	0.492078	Appbp2	0.716864	1	0.861721
Csrp2	0.963934	1	0.178488	Gm4285	0.686851	1	0.740385	Slc39a10	1.79852	0.597984	0.66495	Tnfrsf12a	0.716864	1	2.38917
Zfp667	0.963692	1	0.484635	Mrps36	0.686698	1	0.0985694	Cops7b	1.79837	0.597984	0.615111	Cmtm4	0.716487	1	2.3657
Gm17690	0.963479	1	1.58249	Gmps	0.686544	1	0.117581	Uimc1	1.79757	0.598135	0.485367	Kcnab1	0.715357	1	2.41337
2700094K13Rik	0.96275	1	0.0323893	Dctn3	0.685991	1	0.0772919	Nat10	1.79703	0.598135	0.834702	Akr1b10	0.715169	1	0.601747
Egln2	0.96275	1	0.134056	Hspa14	0.684239	1	0.0880185	Wbscr22	1.79641	0.598603	0.414712	Gm26881	0.714981	1	2.27704
Mrpl1	0.960715	1	0.253501	Tmcc1	0.684085	1	0.224742	Ndufa10	1.79594	0.59888	0.265257	Furin	0.714039	1	1.14332
Cpsf6	0.960442	1	0.121301	Tbc1d16	0.683747	1	0.278633	Pgd	1.79441	0.600199	0.414816	Trmt11	0.713098	1	1.15642
Men1	0.96026	1	0.307156	Fcer1g	0.683655	1	0.0657456	Slc31a1	1.79267	0.601464	0.716392	Tvp23b	0.712721	1	0.518703
Mfap2	0.96026	1	0.451491	Aff1	0.682886	1	0.506692	Kat2a	1.78998	0.60467	0.467461	Tada1	0.712721	1	0.792009
Sufu	0.959713	1	0.784285	B230118H07Rik	0.682671	1	0.121289	Sdsl	1.78958	0.604853	0.290882	Mepce	0.712721	1	1.16665
Atg7	0.959592	1	0.261833	Glb1	0.681257	1	0.119831	Kcnn4	1.78638	0.60875	0.279011	Tle4	0.712721	1	1.14647
Cers5	0.958984	1	0.172831	Ugdh	0.681104	1	0.214783	Mrps11	1.78562	0.60936	0.401845	Abcg3	0.711968	1	0.805674
Jkamp	0.958043	1	0.267585	Polg	0.680643	1	0.32687	Tsr1	1.7854	0.60936	0.524973	Anxa3	0.71178	1	2.41308
Chd6	0.957193	1	0.104882	Pbx4	0.680581	1	0.323241	Otub1	1.78478	0.609835	0.326151	Myd88	0.711215	1	1.17605
Ppfibp1	0.955644	1	0.647711	Ei24	0.680366	1	0.147681	2310009B15Rik	1.78409	0.610108	0.523299	Sh3glb1	0.711215	1	0.545918
Dnajc13	0.954976	1	0.429795	Dcxr	0.679567	1	0.246172	Mtor	1.78405	0.610108	1.13193	Skap2	0.711027	1	0.534248
Dpf2	0.953822	1	0.146356	Klhl15	0.679383	1	0.612716	Wdhd1	1.78017	0.614257	1.31235	Serp1	0.710838	1	0.504531
Lmbrd1	0.951301	1	0.277663	Pcyt1a	0.67926	1	0.183074	Ddx18	1.77966	0.614589	0.281638	Enox2	0.710838	1	1.137
Ptpn6	0.95121	1	0.0622759	Bcor	0.678061	1	0.193203	Mtfp1	1.77795	0.61592	1.07402	Tapbpl	0.710085	1	0.983418
Pgs1	0.950208	1	0.454584	Entpd5	0.677784	1	0.327448	Actr2	1.77762	0.61592	0.303366	Ksr1	0.710085	1	2.3054
Ino80d	0.948568	1	0.197482	Trmt112	0.677292	1	0.0271304	Ncbp1	1.77203	0.622757	0.698879	Fyttd1	0.70952	1	0.635709
Gm37469	0.948386	1	1.06858	Msn	0.676524	1	0.0572305	Api5	1.76854	0.626882	0.37526	Vars2	0.709144	1	2.3304
Rbms1	0.947202	1	0.37291	Coro7	0.675725	1	0.147116	Cstf2	1.76846	0.626882	0.758689	Ndufv2	0.708579	1	0.352131
Avpi1	0.946989	1	0.213205	Lbp	0.67551	1	0.118796	Aco2	1.76592	0.629125	0.310002	Lima1	0.708202	1	1.06773
Dohh	0.946989	1	0.190348	St7	0.674342	1	0.170861	Hcfc1	1.76578	0.629125	0.409551	Tmem17	0.707637	1	2.30655
Dok3	0.946989	1	0.686548	Plxdc2	0.674219	1	0.117115	Commd1	1.76549	0.629166	0.262555	Arhgap31	0.707261	1	0.512914
Pard3b	0.945562	1	0.297971	Gabpb2	0.673512	1	0.126754	Atp5j2	1.76454	0.6301	0.183428	Celsr1	0.706696	1	2.33526
Msrb2	0.944803	1	0.138079	Gm8797	0.673297	1	0.174062	Bag5	1.76356	0.631085	0.336972	Slc25a4	0.706507	1	0.345546
Gm42722	0.944681	1	0.652628	Ankhd1	0.673297	1	0.125412	RP23-60P18.10	1.76294	0.631574	0.5268	Slc25a5	0.705942	1	0.373143
Rdh12	0.944135	1	0.480762	Snupn	0.672528	1	0.488117	Metap1	1.76232	0.631757	0.63558	Itsn2	0.705942	1	0.768026
Rpl9	0.942677	1	0.0515196	Jam3	0.671514	1	0.137928	Sod2	1.76163	0.632297	0.271646	Bpgm	0.705566	1	0.76463
Mrpl45	0.942525	1	0.180878	Mkrn2	0.671514	1	0.203791	Mis12	1.76098	0.632836	0.721067	Pkig	0.705189	1	0.559784
Rit1	0.942434	1	0.183616	Bex4	0.670992	1	0.0631141	Notch2	1.76069	0.632879	0.938331	Tmem67	0.705189	1	2.28534
Def8	0.94207	1	0.122233	4930555A03Rik	0.670377	1	0.234893	Bysl	1.75945	0.634216	0.826345	Tbc1d9b	0.704813	1	1.11076
Vps4a	0.93964	1	0.23068	Kat6a	0.670162	1	0.158235	Smndc1	1.75764	0.635998	0.417126	Rab27b	0.703871	1	0.743482
Dusp28	0.939488	1	0.411948	Myl10	0.668225	1	0.0859701	Eif4e2	1.75615	0.63769	0.309813	Flywch1	0.702365	1	0.961478
Siae	0.93882	1	0.527574	Mirt1	0.668133	1	0.676632	Trmt61a	1.75546	0.638284	0.691079	S100a1	0.701988	1	0.418634
Tmem126b	0.937636	1	0.246269	Tie1	0.668133	1	0.148017	Rnf10	1.75509	0.638427	0.472407	Smim12	0.701423	1	0.612368
A330009N23Rik	0.936178	1	0.416688	2610305D13Rik	0.667734	1	0.476238	Cdc16	1.75426	0.639222	0.370817	Creb3	0.701423	1	1.13579
Banp	0.935966	1	0.268473	Atp2a3	0.667703	1	0.267116	Atp2a2	1.75378	0.639516	0.737621	Mmadhc	0.700293	1	0.636635
Zfp273	0.933445	1	1.09253	2610035D17Rik	0.667396	1	0.0880615	Nol8	1.75331	0.63981	0.429156	Hook1	0.699917	1	1.13398
Lpcat3	0.932413	1	0.144646	Zbtb21	0.667088	1	0.774944	Wbp1	1.75284	0.640105	0.42111	Fam184a	0.699728	1	2.26295
Cpxm1	0.93223	1	0.311941	Hypk	0.66675	1	0.0940432	Zfp326	1.74902	0.64395	0.314879	Rnaset2b	0.69954	1	1.07345
B3gnt8	0.931441	1	0.462438	Aasdhppt	0.666166	1	0.10154	Cbfb	1.74826	0.64438	0.614575	Zfp637	0.699352	1	0.582882
Stim1	0.930773	1	0.355112	Lcor	0.66506	1	0.294091	Ccdc47	1.74782	0.64438	0.281909	Rnaseh2c	0.699352	1	0.375662
Rab13	0.930499	1	0.458761	Ppp1r18	0.664445	1	0.146695	Birc5	1.74772	0.64438	2.35825	Fan1	0.698975	1	2.32643
Tmem192	0.930226	1	0.37124	Gpr107	0.664353	1	0.322354	Bola3	1.74728	0.644577	0.287722	Hace1	0.698599	1	2.2429
Ssu72	0.927918	1	0.0472892	Mapre2	0.663953	1	0.140681	Ptrh2	1.74695	0.644672	0.373773	Bax	0.69841	1	0.350996
1500011K16Rik	0.927615	1	0.0724074	Xk	0.663738	1	0.651358	Vps4b	1.74586	0.645413	0.286683	Arhgdib	0.698222	1	0.1374
Ypel5	0.927159	1	0.374957	Dyrk1a	0.663215	1	0.415166	Ccnh	1.74564	0.645413	0.289347	Qk	0.697657	1	0.88194
4930523C07Rik	0.927129	1	0.322864	Sgk1	0.663093	1	1.02103	Gapdh	1.7435	0.648035	0.238182	Cmip	0.697469	1	0.761789
Ccl4	0.927038	1	0.0905969	Tnfrsf21	0.662908	1	0.22983	Map4k1	1.74219	0.649498	0.596304	Robo3	0.697469	1	2.19066
Prpsap2	0.926643	1	0.324701	Agpat2	0.66257	1	0.106492	2700038G22Rik	1.73823	0.653232	0.729361	Nedd1	0.696904	1	1.10817
Trmu	0.926643	1	0.515988	Hipk2	0.661494	1	0.174165	Cops6	1.73601	0.655618	0.269565	Magoh	0.696904	1	0.380991
Chd4	0.925276	1	0.0231757	Xpo7	0.660849	1	0.216943	Abhd11	1.73554	0.655919	0.351972	Nr1d2	0.696151	1	2.24672
Kptn	0.923272	1	0.383813	Cobll1	0.660419	1	0.621179	R3hcc1	1.73369	0.658164	0.519592	Hars2	0.695774	1	1.0968
Ccdc32	0.922695	1	0.297751	Osbpl9	0.660326	1	0.0815224	Cela1	1.73173	0.659786	0.515585	Ubqln2	0.695021	1	1.15861
Tm4sf1	0.922695	1	0.916809	Ldah	0.660265	1	0.172397	Znhit1	1.73165	0.659786	0.390544	Zfp446	0.694079	1	2.18583
Ppp3r1	0.922482	1	0.240001	Aldoa	0.659404	1	0.0628778	Psmg2	1.73075	0.660181	0.353263	Chst14	0.694079	1	2.27525
Nipsnap3b	0.920691	1	0.174826	Pvr	0.659343	1	0.799647	Dctn4	1.73056	0.660181	0.790203	Qrich1	0.693891	1	0.817008
Taf1	0.919962	1	0.182169	Btd	0.659251	1	0.22206	Mydgf	1.73031	0.660181	0.276996	4930532G15Rik	0.693703	1	2.13058
Zfp146	0.91981	1	0.73831	Foxred1	0.658759	1	0.310738	Telo2	1.7302	0.660181	0.382567	Lpin2	0.693515	1	0.60673
Casp12	0.918899	1	0.205225	Igf2bp2	0.658544	1	0.227604	Setd8	1.72907	0.661409	0.470956	Smad2	0.693138	1	1.09129
Zbtb38	0.918109	1	0.0841882	Stard10	0.658482	1	0.232256	Tm9sf4	1.727	0.663249	0.381868	Ssbp1	0.69295	1	0.390237
1110059E24Rik	0.915893	1	0.193863	Wdr1	0.657806	1	0.112558	Dld	1.72569	0.664738	0.363585	Cpped1	0.692761	1	1.11573
Lamp2	0.91568	1	0.135349	Fam172a	0.657775	1	0.198366	Tpm1	1.72351	0.666583	0.299794	Fnip1	0.692385	1	1.08989
Arhgef6	0.91568	1	0.0979649	Spag9	0.657437	1	0.24391	Sf3b5	1.72337	0.666583	0.254544	Gstk1	0.692008	1	1.11575
Snapc2	0.915194	1	0.377204	Dot1l	0.656976	1	0.340959	Ssbp1	1.72257	0.667355	0.253516	Zfp467	0.69182	1	0.59366
Cacna1a	0.914951	1	0.808803	Ube2q1	0.656915	1	0.256683	Psmc6	1.72013	0.668841	0.278156	Cpq	0.691631	1	0.417999
Zmym5	0.913979	1	0.184154	Acot1	0.656607	1	0.156099	Grwd1	1.72006	0.668841	0.470327	Zfx	0.691443	1	0.791384
Stk25	0.913706	1	0.15768	Zfp212	0.656208	1	0.24205	Ctcf	1.71999	0.668841	0.341044	Ptcd2	0.690125	1	0.551669
Hadh	0.913585	1	0.0639075	Armcx6	0.656116	1	0.187042	Iah1	1.71948	0.669202	0.382085	Det1	0.690125	1	1.05292
Tle2	0.912006	1	0.353403	Wbp2	0.655993	1	0.0619276	Mrps33	1.71875	0.669873	0.196599	Snx2	0.689748	1	0.480966
Morf4l1	0.911428	1	-0.00807571	Vamp2	0.655655	1	0.307903	2510046G10Rik	1.71828	0.670077	0.554939	Btbd3	0.68956	1	2.23049
Eif4h	0.911155	1	0.0137395	Gm26518	0.65504	1	1.03397	Kif20b	1.7181	0.670077	0.779827	Cyhr1	0.689184	1	0.756194
Prkra	0.910335	1	0.178699	Fam13b	0.654732	1	0.278158	Mtf2	1.7137	0.674639	0.262309	Ptcd3	0.688995	1	1.09826
Pi4kb	0.909819	1	0.859065	Tnfsf13os	0.654364	1	0.378475	Rpf2	1.71363	0.674639	0.394757	Abhd14a	0.688619	1	0.563
Acad8	0.909181	1	0.379231	Gimap6	0.653995	1	0.0430254	Psmb7	1.71069	0.677189	0.244902	Rfng	0.68843	1	2.18058
Helz	0.907541	1	0.162294	Irs2	0.653103	1	1.11791	Nbn	1.71014	0.677189	0.73293	Stambpl1	0.688242	1	1.0764
Hexb	0.907056	1	0.159191	Gadd45a	0.653011	1	0.240598	Srp19	1.71007	0.677189	0.28217	Ccl4	0.687866	1	0.51251
Clca3a1	0.906053	1	0.629637	Acer3	0.652089	1	0.231631	Rps19bp1	1.70974	0.677189	0.325058	Actr1a	0.687489	1	1.09411
Tmem115	0.905051	1	0.246361	Ctdsp2	0.651597	1	0.119544	Elavl1	1.70974	0.677189	0.403118	Eno3	0.686547	1	2.18703
Atg12	0.905051	1	0.268027	Nfrkb	0.650768	1	0.145668	Fxn	1.70956	0.677189	0.460441	5730409E04Rik	0.686359	1	1.15825
1110037F02Rik	0.904656	1	0.220376	Satb1	0.650737	1	0.410967	Cul1	1.70829	0.67865	0.271407	Glb1	0.686171	1	0.828668
Stk19	0.903715	1	0.26738	Usp34	0.649815	1	0.0760368	Eif4g3	1.70676	0.680271	0.38249	Hif1a	0.685982	1	0.759274
Vhl	0.903502	1	0.627659	Lhcgr	0.649722	1	0.138557	Gtf2f2	1.70665	0.680271	0.404878	Atp6v1e1	0.685229	1	0.380116
Rab19	0.903077	1	1.45996	Pdap1	0.648093	1	0.0523322	Kars	1.7048	0.682576	0.359363	Rabl3	0.685229	1	2.18252
Gm13012	0.903047	1	0.353624	Smg1	0.647725	1	0.175948	Wdr3	1.70298	0.684834	0.477501	Cenpu	0.684099	1	2.21301
Fau	0.902531	1	0.210848	Rnf135	0.647479	1	0.232381	Ndufaf6	1.70102	0.686941	0.630135	Xdh	0.684099	1	2.12961
Supt5	0.901832	1	0.189711	Zmiz2	0.647141	1	0.186051	Mrpl22	1.69964	0.688576	0.332261	Zfand1	0.683723	1	0.703186
Tmem106c	0.901407	1	0.129452	Ccdc149	0.646864	1	0.911025	Gcn1l1	1.69742	0.690692	0.403345	Ccar2	0.683346	1	1.09078
Neo1	0.90001	1	1.32744	Dennd4c	0.646772	1	0.266955	Ppp1r15b	1.6968	0.691011	0.764197	Vps8	0.683158	1	2.18601
Msn	0.899767	1	0.0289653	Rpl34	0.646772	1	0.00732558	Xpo1	1.6967	0.691011	0.63286	Zfp35	0.683158	1	2.30644
Kmt2e	0.899615	1	0.0139041	Ahnak	0.646741	1	0.456763	Sart3	1.69226	0.697119	0.443419	Etnk1	0.683158	1	0.591156
Tle4	0.898522	1	0.401526	Mgst1	0.646557	1	0.130402	Txndc5	1.6915	0.697866	0.42175	A630072M18Rik	0.68297	1	0.477312
Gltp	0.897277	1	0.0449282	Utp18	0.646342	1	0.139851	Ddt	1.69085	0.698453	0.330438	Elp3	0.68297	1	0.744087
Pafah1b2	0.897004	1	0.128024	Elovl7	0.646188	1	0.495338	Nfu1	1.68968	0.699686	0.270148	Eif2s1	0.682405	1	0.27708
Yipf1	0.896852	1	0.14682	4931406C07Rik	0.64542	1	0.144709	Dnajc30	1.68903	0.699686	0.416458	Isyna1	0.68071	1	0.741817
Syne1	0.894969	1	0.36271	Upf1	0.645358	1	0.22949	Mrps21	1.68888	0.699686	0.252487	Prpsap1	0.68071	1	0.533334
Rab5c	0.894848	1	0.0987814	Cyhr1	0.645051	1	0.146032	Kras	1.68877	0.699686	1.3165	Malat1	0.68071	1	0.129425
Cflar	0.894271	1	0.179193	B3gnt5	0.644467	1	0.483453	Knstrn	1.68874	0.699686	1.6535	Pbx2	0.68071	1	1.0819
Trim6	0.893512	1	0.40667	Elovl6	0.644067	1	0.125103	Wdr5	1.68845	0.699741	0.425972	Atp5f1	0.680522	1	0.177908
Snx1	0.892236	1	0.118875	Zfp24	0.643237	1	0.202441	Ubr7	1.68743	0.700654	0.513497	L3mbtl3	0.680333	1	1.26214
Cnpy4	0.891507	1	0.241797	Ahr	0.642807	1	0.904108	Ywhaz	1.68707	0.700654	0.230615	Gnl3	0.680333	1	0.403895
Snn	0.891052	1	0.38426	Fmnl1	0.642131	1	0.219259	Cmc2	1.68554	0.702528	0.427066	Ap2a1	0.680333	1	1.07846
Lamtor1	0.891052	1	0.0621535	Rnaset2b	0.641885	1	0.306774	Acss2	1.68489	0.703068	0.507908	Rnf219	0.67958	1	0.720947
Rer1	0.890475	1	0.0509507	Ezh1	0.639979	1	0.237738	Dhrs13	1.68376	0.703664	1.04929	Psmc1	0.679392	1	0.458693
Dnm3	0.890444	1	2.08446	Entpd1	0.639795	1	0.950817	Mob3a	1.68358	0.703664	0.62325	Prdx4	0.679204	1	0.374817
Gm12942	0.889715	1	0.417226	Lrrk1	0.638566	1	0.135153	Ppp1r35	1.68271	0.703887	0.29617	Rpp30	0.679015	1	0.900772
Zfp874a	0.889685	1	0.798478	Gdi2	0.637674	1	0.0494419	Arglu1	1.6826	0.703887	0.252986	Gtf2e2	0.678827	1	0.584511
Tor3a	0.888896	1	0.249182	Uap1	0.637613	1	0.142466	Deb1	1.68147	0.705177	0.414211	Pdgfc	0.678639	1	2.1434
Dennd2d	0.888531	1	0.160684	Ceacam1	0.635676	1	1.6714	Arhgdia	1.68056	0.70573	0.229295	Dmap1	0.67845	1	1.33968
Dedd	0.88844	1	0.473252	Armc6	0.635523	1	0.579479	Ilkap	1.67991	0.70573	0.311142	Hcst	0.67845	1	1.04037
Srek1ip1	0.886618	1	0.12536	Pigk	0.635031	1	0.137368	1110004E09Rik	1.67983	0.70573	0.398606	Alkbh5	0.678074	1	1.02971
Prrg2	0.886557	1	0.536792	Cd79b	0.633156	1	0.106597	Atf1	1.6746	0.712742	0.350409	Smim6	0.678074	1	0.725994
Sh3bgrl3	0.886132	1	0.0310461	Lrba	0.632388	1	0.313408	Wrap73	1.67431	0.712799	0.479304	Cldn12	0.677321	1	2.10937
Serpina3f	0.884583	1	0.803091	Maml2	0.631834	1	0.356752	Xndc1	1.67402	0.712857	0.703871	Ccdc60	0.677132	1	2.01654
Adipor1	0.884523	1	0.0652502	Grb2	0.63122	1	0.180401	Rrp15	1.67351	0.713239	0.277242	Zfp831	0.676567	1	2.09168
Saysd1	0.882579	1	0.150385	Sik3	0.629714	1	0.30172	Cnpy3	1.6722	0.714708	0.334121	Gm5160	0.675814	1	2.13859
Zfp286	0.882215	1	0.520138	Specc1l	0.628976	1	0.15032	Idi1	1.67202	0.714708	0.258531	Rabif	0.675438	1	0.736117
Sumo1	0.881304	1	0.0457785	Arhgap5	0.628208	1	0.155724	Wdr83os	1.6705	0.716611	0.270212	Ak4	0.674873	1	1.98743
Mff	0.880575	1	0.043536	Lipe	0.628085	1	0.301913	Lbr	1.66861	0.718738	0.336588	Rab40b	0.674684	1	2.06648
Col4a3bp	0.87939	1	0.339147	Diaph2	0.627931	1	0.306048	Rbm25	1.66857	0.718738	0.163265	Ppp2r1a	0.674684	1	0.453317
Gpr132	0.879056	1	0.326989	Dnaja2	0.627531	1	0.0499303	Cops4	1.66755	0.7192	0.262259	Nup98	0.674496	1	2.0621
Tnfsf10	0.878874	1	0.385571	Gm14302	0.626947	1	0.275745	Ipo9	1.66726	0.7192	0.904574	March5	0.674308	1	1.0637
BC023829	0.878297	1	0.627856	Adgra3	0.626763	1	0.464977	Rcc1	1.66726	0.7192	0.807994	Ngfrap1	0.673366	1	0.409313
Zfp119b	0.877963	1	1.49536	Mdm4	0.626732	1	0.0888465	Rpp14	1.6669	0.7192	0.304166	Ank	0.67299	1	2.0633
Nrg4	0.87769	1	0.692587	Gemin2	0.626425	1	0.162188	Zdhhc16	1.66683	0.7192	0.484782	Sel1l	0.67299	1	0.719434
Tgfbrap1	0.877477	1	0.785661	Limk2	0.625995	1	0.519977	Abcc1	1.66675	0.7192	0.561067	Plekhg1	0.672425	1	2.10917
Pmpcb	0.876931	1	0.123251	Wdr41	0.625073	1	0.304998	Lyrm9	1.6653	0.72093	0.42154	Ercc1	0.672236	1	1.04311
Cpt2	0.876445	1	0.395423	Galm	0.625042	1	0.32876	Kti12	1.66432	0.72093	0.341285	Vwf	0.671672	1	0.676521
Gga1	0.876232	1	0.196671	Anxa4	0.624796	1	0.143817	Txndc17	1.66425	0.72093	0.207039	Snapc1	0.671672	1	1.14417
Pcm1	0.874258	1	0.0592713	Dctn2	0.624058	1	0.0765742	Tex9	1.6637	0.72093	0.718735	Cops4	0.671295	1	0.327333
Pcyt2	0.873681	1	0.144038	Trmt10c	0.623167	1	0.124578	Tor1aip2	1.66359	0.72093	0.445473	Abhd16a	0.670542	1	0.533709
Armcx2	0.872892	1	0.368196	Vrk1	0.622583	1	0.111961	Bcas2	1.66217	0.722257	0.233515	Mtcp1	0.670354	1	2.06059
Mapk12	0.872892	1	0.491004	Polr3d	0.622552	1	0.100971	Fcf1	1.6617	0.722263	0.280901	Psmd10	0.670165	1	0.524705
Emc4	0.87274	1	0.123718	Ube2b	0.622368	1	0.0136334	Ddx10	1.66028	0.723858	0.295992	Tmem106a	0.669977	1	1.98384
Wbp1l	0.872345	1	0.263559	Pum2	0.621937	1	0.0826864	Wdr26	1.65985	0.723919	0.477475	Haus6	0.669789	1	2.06367
Commd4	0.871738	1	0.0939232	Ttc8	0.621507	1	0.333209	Arpc4	1.65919	0.724527	0.276158	Ap1m1	0.669789	1	0.648716
Cox6a1	0.871677	1	0.0183117	Cdk19	0.621261	1	0.222344	Ap3s1	1.65821	0.724658	0.55944	Smpd4	0.669035	1	2.10603
Vrk3	0.871586	1	0.140052	Uba5	0.620708	1	0.0683178	Mrps18a	1.65756	0.724658	0.27336	Tbc1d25	0.668847	1	2.02579
Echs1	0.870888	1	0.0746692	Fxn	0.619202	1	0.139524	Mns1	1.65723	0.724658	1.37786	Ccni	0.668659	1	0.586257
Hiat1	0.870432	1	0.175218	Pop4	0.619171	1	0.256885	Ciapin1	1.65701	0.724658	0.415274	Sla2	0.668282	1	0.872531
Gm26724	0.86943	1	0.139194	Abhd8	0.61911	1	0.0993662	Dscc1	1.65578	0.72554	2.67749	Nr2c1	0.668094	1	2.0794
Npdc1	0.869187	1	0.264514	Exd2	0.618772	1	0.425747	Cdc45	1.65425	0.727361	1.56124	BC005624	0.667906	1	0.42736
Ptprc	0.868944	1	0.0399461	Auh	0.618341	1	0.129406	Ints2	1.65407	0.727361	0.768205	Lncpint	0.667906	1	1.16041
Patz1	0.868914	1	0.186231	Osbpl1a	0.617819	1	0.0845256	Gins1	1.65185	0.729954	1.81737	Uba1	0.667529	1	0.597894
Acer3	0.868731	1	0.35506	Rrp1b	0.61745	1	0.113346	H2-DMa	1.65055	0.731308	0.252202	Mbip	0.666776	1	0.72785
Swt1	0.86861	1	0.0649439	Alg1	0.616651	1	0.26263	Slc29a1	1.64996	0.731308	0.48091	Zfp942	0.666399	1	1.04844
9530082P21Rik	0.865269	1	0.436476	Tmem14a	0.616466	1	0.389305	Tagln2	1.64927	0.731976	0.128868	4930555A03Rik	0.665269	1	1.04207
Enkur	0.865057	1	1.02077	Tead3	0.615729	1	0.882505	Tgfbr3	1.64753	0.733865	0.740622	Ppih	0.664893	1	0.710447
Gucy1a3	0.864996	1	0.115707	Gopc	0.615667	1	0.513693	5430416N02Rik	1.64724	0.73393	0.730518	Gfpt1	0.664704	1	0.827567
Rab2b	0.864875	1	0.335559	Pde7a	0.615114	1	0.356719	Hsph1	1.64684	0.734114	0.468191	C1d	0.664704	1	0.338644
Asb13	0.864267	1	0.29708	Rec8	0.614376	1	0.418367	Prrc2a	1.64662	0.734114	0.376249	Mapk1ip1l	0.664516	1	1.04119
Rpl13-ps3	0.864116	1	0.0233994	Pum1	0.613577	1	0.0573196	Prpf38b	1.646	0.734299	0.215795	Tirap	0.664139	1	2.07452
Setbp1	0.864085	1	1.95933	Scrn2	0.613147	1	0.169751	Magt1	1.6452	0.734826	0.300552	Srf	0.663951	1	2.01745
Serpinb9	0.86366	1	0.21569	Bms1	0.61284	1	0.154693	Pkig	1.64509	0.734826	0.301092	Npr2	0.663575	1	2.00855
Osgin1	0.863417	1	0.381811	Prosc	0.611979	1	0.116014	Flna	1.64491	0.734826	0.581823	Yae1d1	0.662633	1	0.569778
Dusp23	0.863022	1	0.184392	2700062C07Rik	0.611149	1	0.156187	Ap2s1	1.64375	0.736125	0.21701	Plscr2	0.662633	1	2.16839
Prpf31	0.86281	1	0.0958389	Lrif1	0.610442	1	0.134123	Zc3hav1	1.6435	0.736125	0.541983	Phospho2	0.662633	1	1.16636
Commd9	0.862719	1	0.220035	Sec31a	0.610289	1	0.125936	Tmem41a	1.64331	0.736125	0.56713	Fam234a	0.662633	1	1.99354
Icam1	0.862233	1	0.283262	Zc3h7b	0.610227	1	0.173207	Hdgfrp2	1.64001	0.739328	0.391913	Ahsa2	0.662068	1	0.512081
1700040L02Rik	0.861656	1	0.46885	Zfp81	0.610012	1	0.297363	Hist1h1b	1.63823	0.740481	1.72744	Stim1	0.66188	1	1.04367
Ppargc1a	0.861352	1	1.48515	Lats2	0.609981	1	0.52012	Mrps18b	1.63626	0.742998	0.373558	Nup214	0.661692	1	0.692026
Eif2ak2	0.861079	1	0.131283	Dgkg	0.609828	1	0.160514	Gm10036	1.63608	0.742998	0.243947	Rasa3	0.661503	1	0.754163
Acadm	0.860836	1	0.0454916	1810043G02Rik	0.609705	1	0.218815	Ints7	1.63536	0.743355	0.774279	Trmt61a	0.661503	1	0.978124
Zfp101	0.860289	1	0.448537	St3gal1	0.609489	1	0.0912431	Dbr1	1.63445	0.744367	0.754637	Prkg1	0.66075	1	0.956383
Nat6	0.860168	1	0.384056	Esf1	0.609182	1	0.0472089	Mrps26	1.6335	0.744472	0.282244	4931414P19Rik	0.66075	1	1.96129
Trim21	0.859834	1	0.92692	Zbed3	0.608998	1	0.188426	Psmc3	1.63303	0.744651	0.260654	Gm18025	0.660373	1	2.02423
Pxmp2	0.858983	1	0.670631	Trf	0.608875	1	0.272646	Msh3	1.63274	0.74472	0.572705	Ndufa3	0.659809	1	0.541196
Fadd	0.85789	1	0.518688	Cmip	0.608752	1	0.148645	Gm28727	1.63081	0.746496	0.429298	Asph	0.65962	1	0.590619
Zufsp	0.857313	1	0.281866	Abhd14a	0.60869	1	0.0885308	Clpp	1.63001	0.74669	0.272149	Zfp672	0.65962	1	1.02303
Chm	0.856341	1	0.465528	Iffo1	0.608598	1	0.314052	Chchd3	1.629	0.747719	0.271138	Trp53bp1	0.659432	1	0.679532
Rpp25l	0.85379	1	0.10274	C1qtnf4	0.608475	1	0.589102	Dera	1.62802	0.748569	0.37005	Dap	0.659244	1	0.42514
Ifit1	0.853547	1	0.249434	Rabl6	0.608291	1	0.130116	Ccdc167	1.62689	0.749921	0.696659	H2-Q10	0.658867	1	2.0378
Pcmtd2	0.853456	1	0.226855	Tax1bp1	0.607768	1	0.0341294	Bccip	1.62413	0.752995	0.274395	Nelfa	0.658679	1	0.712747
4930556M19Rik-1	0.853396	1	0.514893	Apip	0.607522	1	0.179026	Kdelr2	1.62326	0.753625	0.332152	Ocln	0.65849	1	2.00129
Fam192a	0.853244	1	0.15392	Rps13	0.607461	1	0.001528	Psme2b	1.62147	0.755993	0.591434	Sart1	0.65849	1	1.00875
Dhx16	0.851725	1	0.415386	4930523C07Rik	0.606692	1	0.107335	1110008F13Rik	1.62082	0.756247	0.320454	Ascc1	0.657549	1	0.857198
F830016B08Rik	0.851088	1	0.490514	Adat2	0.606016	1	0.424741	Rae1	1.61966	0.757133	0.259674	Psip1	0.657549	1	0.532049
Ywhab	0.850754	1	0.0404951	Zmat5	0.605924	1	0.0806531	Atm	1.61962	0.757133	0.652152	Galnt4	0.657172	1	1.86475
Slc37a1	0.849873	1	0.374375	Cd55	0.605217	1	0.194106	Bola2	1.61951	0.757133	0.239898	9430015G10Rik	0.656984	1	1.94546
3110056K07Rik	0.849448	1	0.362086	Hotairm1	0.605125	1	0.716653	2410002F23Rik	1.61839	0.758497	0.422288	Rab29	0.656984	1	1.00815
Gpx4	0.847929	1	0.0165192	Gtf2b	0.60491	1	0.0768642	Gstz1	1.61693	0.75999	0.570998	Gcc2	0.656419	1	0.597637
Zcchc17	0.847747	1	0.0572607	Abcc5	0.604326	1	0.288833	Cenpk	1.61293	0.765059	1.89063	Arv1	0.655854	1	2.02097
Aamp	0.847383	1	0.0499097	Amer1	0.604203	1	0.113003	Parp11	1.6125	0.765358	0.595152	Arhgef9	0.655666	1	1.97012
Extl3	0.847322	1	0.497006	Pcgf5	0.603803	1	0.175607	Fundc2	1.61123	0.766959	0.243356	Erc1	0.653971	1	1.0229
Maged1	0.846776	1	0.138971	Tlk2	0.603496	1	0.184912	Srsf11	1.60803	0.769365	0.157962	Sf3a3	0.653595	1	0.376525
C1rl	0.846684	1	0.192291	Prpf8	0.603342	1	0.141217	Eri1	1.60796	0.769365	0.354027	Polr2j	0.653406	1	0.283197
Gt(ROSA)26Sor	0.846624	1	0.248071	Yif1b	0.602728	1	0.0406235	Nras	1.60752	0.769365	0.351337	Tsen2	0.652653	1	1.01648
Usp42	0.845257	1	0.552063	Anapc11	0.602635	1	0.0461368	Lrrc42	1.6073	0.769365	0.519648	Pdia3	0.652088	1	0.177853
Sdc4	0.844741	1	0.403649	Usp19	0.602328	1	0.123228	Senp1	1.60694	0.769365	0.512278	Tesk1	0.652088	1	1.9298
Ndnf	0.844498	1	1.50379	Mboat7	0.602267	1	0.164995	Cdk2	1.60414	0.772958	0.483258	1500011K16Rik	0.6519	1	0.365351
Cpox	0.843769	1	0.610622	Samd9l	0.601928	1	0.0978642	Ccdc58	1.60363	0.772958	0.357803	Cabin1	0.651712	1	0.569317
Drg1	0.842767	1	0.10186	Pitrm1	0.601467	1	0.178428	Prpf38a	1.60349	0.772958	0.298252	Scarf1	0.651523	1	0.465465
Bckdha	0.841826	1	0.148661	Flrt3	0.600453	1	1.4887	Taf1d	1.60236	0.774343	0.256832	Rnf130	0.651335	1	0.68848
Cdc40	0.841522	1	0.0902707	Napsa	0.600299	1	0.0474715	Aasdhppt	1.60112	0.775575	0.345892	Ebag9	0.650582	1	0.990244
Laptm4b	0.84137	1	0.338653	Mxd4	0.600084	1	0.144959	Naa15	1.60109	0.775575	0.291382	Map7	0.650205	1	0.813323
Agk	0.840793	1	0.175441	Tpm3-rs7	0.599347	1	0.244138	Dhrs7b	1.59982	0.777192	0.458417	Cd86	0.650017	1	2.19505
Gas6	0.839275	1	0.515937	Cdk18	0.599162	1	0.438438	Aldh18a1	1.598	0.779287	0.788852	4931406C07Rik	0.650017	1	0.696322
Ccdc171	0.837999	1	0.398945	Limd2	0.598824	1	0.0541579	Chordc1	1.59607	0.780963	0.305072	Cd2bp2	0.649829	1	1.02547
S100pbp	0.836845	1	0.475421	Fundc1	0.598732	1	0.0997389	Jak2	1.596	0.780963	0.933752	Ino80b	0.649829	1	0.990929
Fam134c	0.834537	1	0.537354	Rnf19b	0.598332	1	0.749857	Mad2l2	1.59596	0.780963	0.460289	Plcb4	0.649264	1	0.654819
Syde1	0.833505	1	0.703716	Pik3ca	0.598025	1	0.131777	Myo1g	1.59291	0.785078	0.487836	Kdm1a	0.648699	1	0.992375
Car5b	0.833414	1	2.0555	Chaf1b	0.597349	1	0.109474	Grb2	1.59288	0.785078	0.459507	Pld1	0.647192	1	1.96212
Tcn2	0.833292	1	0.331684	Macf1	0.597134	1	0.0729827	Thoc6	1.59244	0.785384	0.417567	Vrk2	0.646816	1	0.957589
Dnajc1	0.832685	1	0.0374628	Creld1	0.597072	1	0.258485	Rrp9	1.59037	0.787301	0.433565	Pik3r2	0.646439	1	1.98626
Tmem55b	0.832654	1	0.320555	Tbc1d13	0.59658	1	0.700256	Srp72	1.59026	0.787301	0.2416	Mllt6	0.645498	1	1.8752
Yae1d1	0.831652	1	0.138244	1300002E11Rik	0.594767	1	0.20291	Cltb	1.58953	0.787685	0.262109	Hmgn5	0.645498	1	0.439866
Psmd10	0.831045	1	0.13585	D15Ertd621e	0.594736	1	0.418401	Uxt	1.58855	0.788472	0.435606	Marveld2	0.643991	1	1.82401
Trim24	0.830681	1	0.744011	Vps33b	0.59449	1	0.412468	Kansl2	1.58772	0.789415	0.425193	Pdcd2l	0.643426	1	0.977106
Sf3b1	0.829435	1	0.0247255	Gm6563	0.594152	1	0.152037	Ubxn2a	1.58684	0.790417	0.489834	Haus3	0.643426	1	1.05904
Ap5s1	0.829375	1	0.820062	Ggt5	0.593691	1	0.647258	Twf2	1.5855	0.792017	0.323201	Ubr1	0.643426	1	0.994798
Pde1c	0.829344	1	1.17355	Naf1	0.593661	1	0.306832	Cad	1.58535	0.792017	0.964921	Ppie	0.64305	1	0.378662
Uhrf2	0.82901	1	0.121092	Fkbp8	0.592462	1	0.0630118	Stx4a	1.58488	0.792384	0.242424	Rasa4	0.642485	1	1.91845
Tpst2	0.828859	1	0.040618	Asl	0.592431	1	0.125181	Tet3	1.58394	0.793118	0.387068	Krt7	0.642297	1	1.85597
Ndufb8	0.828555	1	0.0162598	Nup88	0.592247	1	0.243819	Exo1	1.58339	0.793216	1.993	Msh2	0.64192	1	0.470555
9530068E07Rik	0.827947	1	0.118637	Ldb1	0.592001	1	0.105852	Rad18	1.58339	0.793216	1.28302	Dlst	0.641543	1	0.953509
Msh5	0.827947	1	0.795725	Fam161a	0.591171	1	1.70169	Fam96a	1.58121	0.79496	0.197448	Sorbs2	0.640602	1	1.88934
Leprotl1	0.827401	1	0.094385	Chst10	0.590925	1	1.12129	Smg7	1.58085	0.79496	0.777321	Faap20	0.640225	1	0.415012
Fam188a	0.826885	1	0.603769	Tmsb4x	0.590341	1	0.00878669	Mrpl34	1.5803	0.795445	0.249145	Zc3h3	0.63966	1	1.86485
Sh3bp5	0.826854	1	0.282398	Sec23b	0.590126	1	0.250874	Rev1	1.57805	0.798275	0.607532	Lrrc58	0.63966	1	0.386982
Mapkap1	0.825275	1	0.13412	Zfp560	0.589665	1	0.118177	Il12a	1.57678	0.799153	0.638381	Gtpbp1	0.639284	1	1.83029
Gm17259	0.824151	1	0.79671	Nop2	0.588405	1	0.179261	Xpo6	1.57627	0.79937	0.507344	Sumo1	0.639095	1	0.206894
Poglut1	0.821358	1	0.348194	Oxa1l	0.588251	1	0.096887	Rrs1	1.57423	0.801685	0.909104	Alg13	0.638907	1	1.68554
4833407H14Rik	0.821327	1	1.11016	Bag3	0.58822	1	0.53724	Mfsd10	1.57376	0.802057	0.255914	Ganab	0.638907	1	0.696659
Armcx1	0.821024	1	0.175123	Rcbtb2	0.587974	1	0.0540502	Fgfr1op	1.57322	0.802546	0.593211	Rnf20	0.638531	1	0.842339
Pcgf1	0.820507	1	0.400012	Cyfip2	0.586684	1	0.102271	Dcps	1.57198	0.804144	0.281793	Tsfm	0.638342	1	0.526749
Lztfl1	0.820113	1	0.101731	Mak16	0.586561	1	0.0776611	Prkrir	1.571	0.804511	0.981383	Hacl1	0.637401	1	0.922519
2310011J03Rik	0.819657	1	0.129609	Crebrf	0.586253	1	0.0691196	Syk	1.56762	0.808068	0.519376	Rcan1	0.637212	1	1.78623
Tmem135	0.819566	1	0.493255	Slc50a1	0.584716	1	0.0288974	Ppip5k2	1.5654	0.810271	0.60265	Gdap10	0.636836	1	1.8986
Irf7	0.819384	1	0.257399	Taf1b	0.584409	1	0.175209	Dgcr2	1.56402	0.811457	0.464617	Cldn10	0.636271	1	1.82854
Pip5k1a	0.818807	1	0.193581	Mbnl3	0.584071	1	0.519118	Rasgrp2	1.56315	0.812186	0.275807	Skiv2l2	0.636083	1	0.984283
Smim8	0.818291	1	0.161849	Simc1	0.583856	1	0.736132	Nktr	1.56184	0.813187	0.217242	Pura	0.635894	1	0.347959
Usp40	0.818017	1	0.249301	Pcyox1	0.58321	1	0.285649	Fam173a	1.56166	0.813187	0.283264	Adgrl4	0.635706	1	0.425389
Tradd	0.817926	1	0.118921	Gpbp1l1	0.58278	1	0.0941475	Zc3h18	1.56133	0.813187	0.255968	Fads3	0.635706	1	1.84062
Nosip	0.81744	1	0.208797	Gm9889	0.582719	1	2.09442	Exosc3	1.55966	0.815508	0.279961	Gm8730	0.635706	1	0.0671892
Inpp4a	0.816985	1	0.590986	Rexo4	0.582042	1	0.139897	Ece2	1.55875	0.816594	0.552127	Ufm1	0.635141	1	0.543637
Lrif1	0.816681	1	0.182292	Alg9	0.582042	1	0.386955	Ubap2l	1.55665	0.819632	0.217565	Nae1	0.634576	1	0.556565
Tirap	0.816195	1	0.801638	Parg	0.581827	1	0.233556	Mrpl4	1.55534	0.821373	0.288929	C730034F03Rik	0.634011	1	1.79901
Mrfap1	0.815375	1	-0.00992845	Rtca	0.581551	1	0.212898	Pdk1	1.55483	0.821812	0.324832	Hps1	0.633635	1	0.95149
Zfp949	0.815102	1	0.437669	Cd72	0.581366	1	0.199238	Pyurf	1.55447	0.821861	0.252044	Gab1	0.633258	1	1.87864
Spcs2	0.814889	1	0.0160743	A230046K03Rik	0.580752	1	0.15143	Wdr1	1.55432	0.821861	0.304107	Psma8	0.63307	1	1.83473
Sp140	0.814798	1	0.122024	Soat1	0.580752	1	0.202674	l7Rn6	1.55221	0.824521	0.270232	Kctd12b	0.632881	1	1.73377
1700030K09Rik	0.814039	1	0.526176	Ube2j2	0.58069	1	0.154742	Dab2ip	1.55134	0.825343	0.527531	Elp6	0.632316	1	1.85315
Klhl22	0.813675	1	0.446917	Vav1	0.580475	1	0.115049	Yif1a	1.55123	0.825343	0.302985	Srr	0.63194	1	1.74945
Cd53	0.812824	1	0.732083	Mrpl46	0.580168	1	0.0999662	Xrcc6bp1	1.5496	0.827237	0.368423	Ide	0.631752	1	0.725552
Trappc6b	0.811731	1	0.0875638	Slco2a1	0.580045	1	1.25225	Mkks	1.54785	0.828426	0.30006	Psmd11	0.631752	1	0.445116
Vdr	0.811549	1	0.265496	Nisch	0.579645	1	0.053784	Bop1	1.54771	0.828426	0.512388	Ubxn2b	0.631375	1	0.940705
Camk1	0.811458	1	0.0969016	Rab11fip2	0.578723	1	0.330714	Wdr61	1.54767	0.828426	0.263344	Klf10	0.631187	1	0.494413
Ptpn22	0.811245	1	0.232036	Coro2a	0.578692	1	0.108642	Psph	1.54738	0.828426	0.308735	Apex2	0.630998	1	1.87813
Msmo1	0.811124	1	0.179612	Yeats4	0.578569	1	0.0550509	Sin3a	1.54734	0.828426	0.406283	Mob3a	0.630998	1	0.967787
Top3b	0.811002	1	0.160758	Gm18025	0.577893	1	0.547535	Ppp6c	1.5472	0.828426	0.39492	Ap4m1	0.63081	1	0.659745
Ift80	0.810972	1	0.590923	Stx7	0.576602	1	0.0986491	Prkcsh	1.54516	0.830437	0.238765	Gpkow	0.630622	1	1.70177
Smc4	0.80997	1	0.0276699	Plcg2	0.575834	1	0.175846	Srrt	1.54502	0.830437	0.261655	Txnrd1	0.630433	1	0.406869
Arid5b	0.809848	1	0.318483	Runx1t1	0.575527	1	0.294446	Mdfi	1.5444	0.83106	0.32652	Prmt7	0.630057	1	0.523908
Zfp760	0.809453	1	0.516649	Shprh	0.575158	1	0.136205	Ndufs8	1.544	0.831325	0.238349	Eif1ad	0.629492	1	0.658234
Fam134a	0.809271	1	0.283548	Dbf4	0.574973	1	0.274659	Timm8b	1.54276	0.832965	0.239301	Prkcq	0.629492	1	0.648742
Gm26632	0.808725	1	0.400404	Triqk	0.574758	1	0.207137	Dnaja3	1.54124	0.835085	0.317111	Ilf2	0.629304	1	0.4584
Stxbp3	0.808634	1	0.264583	Trib2	0.574604	1	0.628058	Eif3d	1.54026	0.83631	0.20602	Rita1	0.629115	1	1.8537
Snx14	0.808451	1	0.336889	Srrm1	0.574574	1	0.0395222	1700037H04Rik	1.53978	0.836697	0.583859	Mipep	0.629115	1	1.82295
Mapk8ip3	0.807237	1	0.352332	Hacl1	0.57399	1	0.223609	Naa25	1.53433	0.84454	0.492504	Tes	0.628739	1	0.740764
Pacrgl	0.80672	1	0.39567	Atp6v0b	0.573897	1	0.0319585	Hspa4	1.53343	0.845337	0.239437	Gata2	0.628551	1	0.334823
Phf1	0.806356	1	0.553023	Gtf2h4	0.573805	1	0.1742	Thrap3	1.53328	0.845337	0.198237	Tsix	0.627986	1	0.874388
Trmt12	0.806234	1	0.397911	Lsr	0.573805	1	0.344382	Gnb1	1.53277	0.845337	0.40793	Neu1	0.627986	1	0.972623
Sec22b	0.805354	1	0.097359	Rasa2	0.572945	1	0.244396	St6galnac4	1.5327	0.845337	0.430316	Idh3g	0.627609	1	0.433451
Il18bp	0.803623	1	0.52644	Kif23	0.572607	1	0.208682	Decr1	1.53266	0.845337	0.297888	Tcea1	0.627232	1	0.476113
2900026A02Rik	0.803471	1	0.418339	Tfap4	0.572607	1	0.0990206	Sep15	1.53088	0.847111	0.141112	Lax1	0.627232	1	1.83107
Ppp2r3d	0.80338	1	0.26067	S100a9	0.572453	1	0.768436	Syngr2	1.52881	0.849769	0.251271	1700021F05Rik	0.627232	1	1.15786
2610037D02Rik	0.802742	1	0.566336	Mocs1	0.572361	1	0.525217	Zfp553	1.52688	0.852096	0.488461	Zfand3	0.626479	1	0.873943
Rab43	0.802499	1	0.84842	4932438A13Rik	0.572053	1	0.123232	Hilpda	1.52678	0.852096	0.27293	H6pd	0.626103	1	1.77257
Mitd1	0.802469	1	0.248111	Enox2	0.571961	1	0.198266	Mbd1	1.5267	0.852096	0.438301	Crlf3	0.626103	1	0.144909
Cdc37l1	0.802044	1	0.151001	Ski	0.571408	1	0.195927	Dnmt3b	1.52616	0.85261	0.400006	Haus1	0.625914	1	0.968673
Lztr1	0.801193	1	0.391149	Adsl	0.571162	1	0.114446	Rfc1	1.52579	0.85282	0.255778	Agap2	0.625726	1	0.914757
Cul7	0.800161	1	0.349116	Adal	0.570947	1	0.5741	Ppcs	1.52361	0.855674	0.506274	Adamts10	0.625726	1	0.945523
Tnip1	0.800131	1	0.228127	Flcn	0.570578	1	0.148893	Nrbf2	1.52321	0.855945	0.345062	Zkscan3	0.624973	1	0.460608
Usf2	0.8001	1	0.155559	Gltscr1l	0.570363	1	0.388652	Rab27b	1.52071	0.859257	0.401181	Dctn3	0.624784	1	0.293196
Mbtps2	0.800039	1	0.485525	Rnf217	0.569963	1	0.652403	Wdr46	1.52023	0.859257	0.85524	Gata3	0.624596	1	0.637412
Polr3c	0.798855	1	0.244779	Efcc1	0.569625	1	0.209548	Golga4	1.52005	0.859257	0.267789	Txndc16	0.62422	1	1.788
Tor1aip1	0.798643	1	0.117624	Trrap	0.569564	1	0.161062	Emc6	1.51893	0.860317	0.210678	Acsl5	0.62422	1	0.385245
Ankfy1	0.798339	1	0.334609	Mau2	0.569287	1	0.128253	Usp14	1.51824	0.860317	0.272075	Hmgxb4	0.623466	1	0.631003
Gstt2	0.796942	1	0.265546	Ap5z1	0.568396	1	0.516934	Smarce1	1.51646	0.862515	0.216692	Sap30	0.622901	1	0.740939
Bet1	0.796881	1	0.083264	Arf2	0.567105	1	0.294441	Slf1	1.5142	0.865515	0.434304	Adam15	0.622713	1	1.69707
Sesn2	0.79682	1	0.828323	Arhgap6	0.567013	1	0.154228	A430005L14Rik	1.51315	0.866494	0.321541	Llgl1	0.622525	1	1.79133
Mmp16	0.796365	1	0.47067	Ramp2	0.566121	1	0.463351	Med7	1.51268	0.866825	0.312063	Uspl1	0.622337	1	0.940518
Minpp1	0.796213	1	0.153828	Bbs9	0.56566	1	0.655983	Ica1	1.51246	0.866825	0.393445	Trak1	0.621772	1	1.71709
Stard7	0.795879	1	0.254617	Thap4	0.56563	1	0.193059	Nufip2	1.51173	0.866825	0.445709	Map3k4	0.621395	1	0.643473
Snapin	0.794968	1	0.127763	Mrpl50	0.565414	1	0.0797804	Eif2b3	1.51169	0.866825	0.424937	Padi1	0.621018	1	1.79436
Gng2	0.794543	1	0.190431	Rarb	0.564984	1	0.292072	Skp2	1.5109	0.866825	0.968082	Trio	0.62083	1	1.73776
Cldn5	0.794421	1	1.00315	Aars2	0.564615	1	1.27169	Parl	1.50962	0.867808	0.2679	Matk	0.620642	1	0.534807
Hoxb6	0.792356	1	0.876307	Cmpk1	0.564615	1	0.067544	Suclg1	1.50941	0.867808	0.212243	Eml4	0.6197	1	0.949328
Clip3	0.791871	1	0.534864	Mtrf1	0.564431	1	0.28972	Atxn2	1.50933	0.867808	0.554086	Evc2	0.6197	1	1.73721
Ttf1	0.790261	1	0.175693	Ralgps1	0.564369	1	1.05301	Aifm1	1.50726	0.870851	0.365924	Tdg	0.619324	1	0.914183
Rilpl2	0.789897	1	0.10578	Mageh1	0.563908	1	0.115469	Taok2	1.50548	0.87273	0.446451	Irf3	0.619135	1	0.486431
Trove2	0.788712	1	0.331429	Pxmp4	0.563847	1	0.206306	Tdg	1.50395	0.874551	0.491707	Ap1ar	0.618947	1	1.78638
Fgfr1	0.78853	1	0.734587	Nipa2	0.563816	1	0.136504	Polr3d	1.50294	0.87517	0.32163	Gng12	0.618759	1	0.645419
Ttc4	0.787801	1	0.167027	Anapc10	0.563785	1	0.111246	Psma5	1.50283	0.87517	0.163598	Zfp593	0.618382	1	0.732151
Slc17a5	0.78768	1	0.383929	Gm42726	0.56357	1	0.288048	Prkar2b	1.49905	0.881205	0.432895	Bud13	0.618382	1	1.82377
Tmem106b	0.787467	1	0.394661	Rab29	0.56354	1	0.225774	Tctex1d2	1.49745	0.883039	0.282756	Gnas	0.617817	1	0.328393
Tcta	0.787315	1	0.4827	Armc3	0.56354	1	0.121741	Pak1ip1	1.49676	0.883505	0.244564	Etv5	0.617629	1	1.67122
Snapc3	0.786222	1	0.274792	Gps1	0.562925	1	0.0934842	Arpp19	1.49556	0.885154	0.23918	Ptrhd1	0.617441	1	0.660916
Zhx1	0.785979	1	0.166154	Pnisr	0.562495	1	0.00899701	Zc3h15	1.49531	0.885186	0.224603	Tubd1	0.617064	1	1.70853
Rcbtb2	0.785797	1	0.101981	Crtc1	0.562064	1	0.248788	Drg1	1.49367	0.886902	0.264319	Mpc2	0.616876	1	0.295781
Frg1	0.785675	1	0.0707443	Slc25a25	0.561142	1	1.03779	Josd2	1.49323	0.887121	0.298164	Mettl6	0.616688	1	1.13086
Zfp871	0.785675	1	0.225735	Suv420h1	0.560835	1	0.105219	BC003965	1.49211	0.888308	0.285725	Fopnl	0.616499	1	0.51458
Trmo	0.785432	1	0.369499	Esr1	0.560681	1	0.340869	Gm10250	1.49207	0.888308	0.379035	Trmt10b	0.616311	1	0.904349
Fbxo25	0.784916	1	0.503412	Abcd4	0.56065	1	0.563045	Iars	1.48931	0.892249	0.58413	Zfp574	0.616311	1	1.73839
Atg10	0.783975	1	0.315846	Slc25a43	0.560497	1	1.14407	Rp9	1.48895	0.892249	0.18179	Eea1	0.616123	1	0.498721
Gstt3	0.783732	1	0.564052	Epb41l4b	0.559821	1	0.183926	H2afx	1.48815	0.89266	0.304057	Senp1	0.616123	1	1.1114
Fem1c	0.783276	1	0.270654	4930503L19Rik	0.559605	1	0.345473	Polr1a	1.48804	0.89266	0.612432	Ift140	0.615934	1	1.76682
Tmem38b	0.783003	1	0.381097	Dnlz	0.55936	1	0.114873	3110082I17Rik	1.48728	0.893319	0.863388	Ilk	0.614616	1	0.471636
Fads3	0.782912	1	0.739528	Tap2	0.55936	1	0.0676251	Ncapd3	1.48408	0.897281	0.348511	Snrnp200	0.61424	1	0.628903
Atg101	0.782305	1	0.0467987	Naaa	0.558868	1	0.713338	Abca2	1.48379	0.897281	0.604268	Wnk1	0.61424	1	0.346379
Rgs3	0.782274	1	0.576301	Hes6	0.558437	1	0.0889121	Exosc2	1.48357	0.897281	0.455877	Rcn3	0.613675	1	0.537084
Adipor2	0.782183	1	0.100406	Wash1	0.558069	1	0.110892	Pds5a	1.48197	0.899639	0.322174	Cdipt	0.613298	1	0.725436
Stk10	0.782001	1	0.520073	Ier5	0.557853	1	0.570821	Hdac3	1.48172	0.899644	0.295139	Xpnpep3	0.61311	1	1.88333
Trp53i13	0.781849	1	0.185724	Cklf	0.557638	1	0.149362	Spn	1.47954	0.901823	0.237107	Fut10	0.61311	1	1.76193
Ddx10	0.781637	1	0.0942749	Pdcd1lg2	0.557392	1	0.580755	Zbtb45	1.47692	0.904734	0.801424	Ccpg1	0.612922	1	1.12608
Cdkn1c	0.781303	1	0.306645	Gmeb2	0.5573	1	0.76654	Prmt5	1.47666	0.904769	0.334593	Fmo5	0.612922	1	1.09536
Cyp4f13	0.780149	1	0.299822	Slc25a53	0.557269	1	0.414011	Kin	1.47485	0.907519	0.299734	Rap2b	0.612545	1	0.639788
Mettl23	0.780088	1	0.0577899	Gsta4	0.557054	1	0.168888	Tmf1	1.47354	0.908573	0.51387	Smek1	0.612545	1	0.94411
Dok1	0.77942	1	0.120935	Chil5	0.55644	1	0.267049	Mettl16	1.47296	0.908777	0.311302	Nrgn	0.612357	1	0.35476
Cbarp	0.777841	1	0.627337	Mpp5	0.556409	1	0.16654	0610007P14Rik	1.47274	0.908777	0.231947	Slc35d1	0.612168	1	1.67168
Trappc5	0.776595	1	0.075526	Sap30	0.556378	1	0.147865	Top1mt	1.47201	0.909193	0.920263	F2rl3	0.612168	1	0.903341
Rgl2	0.776474	1	0.201672	Rere	0.556286	1	0.157947	Ythdf2	1.47074	0.910449	0.247899	Ypel2	0.612168	1	1.71433
Aph1c	0.776079	1	0.395005	Tek	0.556286	1	0.353687	Bscl2	1.47023	0.910449	0.271369	Atp10a	0.611792	1	1.57119
Tbkbp1	0.776018	1	0.331998	Pdgfc	0.556194	1	0.592708	Brip1os	1.47012	0.910449	0.647666	Morc3	0.611603	1	0.460583
Tmem131	0.775654	1	0.566134	Vamp8	0.556163	1	0.0321986	Psmd14	1.46685	0.914996	0.224501	Cd47	0.611038	1	0.177313
Srp68	0.775229	1	0.178929	Zfp512b	0.555733	1	0.480904	Mib1	1.46682	0.914996	0.647074	Gm28187	0.611038	1	1.62999
Dynlt3	0.774379	1	0.0822049	Igf2bp3	0.555518	1	0.112837	Morf4l2	1.46645	0.915223	0.207987	Lage3	0.610474	1	0.364207
1110034G24Rik	0.774227	1	0.857448	Dock11	0.554749	1	0.151406	Pigu	1.46544	0.916595	0.564505	Cggbp1	0.609909	1	0.379139
Appl2	0.774075	1	0.350539	Arl15	0.554688	1	0.31939	Bsg	1.46456	0.917341	0.156155	Camk2a	0.60972	1	1.68057
Spaca6	0.774014	1	0.392418	Rhno1	0.554257	1	0.179331	Ncln	1.46431	0.917341	0.71359	Cyth2	0.60972	1	0.80412
Naga	0.773802	1	0.246631	Kmt2b	0.553612	1	0.322044	Tcf20	1.46304	0.91916	0.488092	Keap1	0.60972	1	0.42992
Hgs	0.773711	1	0.322973	Srrd	0.553458	1	0.819579	Cd52	1.4626	0.919516	3.1755	Scml4	0.609532	1	1.72281
Ccdc125	0.77283	1	0.408364	Zc3h4	0.552751	1	0.284125	Gm16586	1.46166	0.920764	0.584313	Ccdc28a	0.609532	1	0.924259
Rap1gap	0.772526	1	0.636314	Frat2	0.552321	1	0.918488	Gatad1	1.46089	0.921694	0.647155	Tcn2	0.609532	1	0.908228
Prdx4	0.771433	1	0.0742366	Cept1	0.552321	1	0.114211	Itgb3bp	1.45846	0.925475	0.458289	Sp2	0.609344	1	1.67375
Samd12	0.77119	1	0.250036	Dpcd	0.552075	1	0.139838	Acsl5	1.45828	0.925475	0.273862	Dfna5	0.609344	1	0.636072
Cbr1	0.770461	1	0.0843304	2610021A01Rik	0.552014	1	0.785045	Rps18-ps3	1.45646	0.927445	0.228074	Zfp521	0.609344	1	1.91771
Aga	0.770431	1	0.210685	Thnsl1	0.551307	1	0.404247	Prdx4	1.45606	0.927738	0.224598	Rabepk	0.609155	1	0.489558
Zfp553	0.770249	1	0.300281	Syne3	0.550538	1	0.565537	Fam92a	1.45315	0.931226	0.280811	Ccm2	0.609155	1	0.491915
Gm16124	0.768973	1	0.19003	Gm2a	0.550139	1	0.126594	Naa38	1.45268	0.931238	0.226473	Ube2i	0.608779	1	0.349774
Ankrd46	0.768548	1	0.301009	Pigl	0.550108	1	0.489413	Ttc27	1.4513	0.933269	0.589347	Klc2	0.608779	1	1.69254
Ganc	0.768062	1	0.219592	Rap1b	0.549831	1	0.118911	Sqle	1.45083	0.933693	0.267356	Ercc2	0.608591	1	1.98169
Rac1	0.767181	1	0.0823479	Ccdc126	0.548479	1	0.318169	Phf23	1.45021	0.934375	0.333761	Eapp	0.608214	1	0.466165
Fez2	0.765694	1	0.264744	Map3k12	0.548356	1	0.522514	Cdc7	1.44974	0.9348	1.91453	Rpl10a	0.608214	1	0.0857068
Izumo4	0.765663	1	0.296254	Tmem71	0.547403	1	0.211536	Ccdc22	1.44825	0.936617	0.450124	B3galt6	0.608026	1	1.75894
Qsox1	0.765511	1	0.201679	Brd8	0.547311	1	0.0429478	Slc25a32	1.44763	0.936887	1.18259	Mgat2	0.607649	1	0.473856
Klhl3	0.764873	1	0.863782	Arl3	0.547219	1	0.0632828	Hmgcr	1.44712	0.937378	0.293367	P3h4	0.607461	1	1.71692
Mrpl22	0.764631	1	0.139796	Tmem39a	0.547157	1	0.273002	Adrm1	1.44683	0.937456	0.307464	Pwp2	0.607272	1	1.67786
Fbxo3	0.764175	1	0.0953852	mt-Atp8	0.546604	1	0.150111	Abcf2	1.44363	0.9411	0.398965	Irak1bp1	0.607272	1	0.9132
Oxnad1	0.763264	1	0.45888	Ints10	0.546328	1	0.179617	Sec63	1.4428	0.942174	0.624384	Ostf1	0.606896	1	0.270033
Arpc1a	0.762292	1	0.0682848	Rab38	0.546174	1	0.073969	Rdx	1.44196	0.94325	0.214687	Fbxo9	0.606896	1	0.363869
Mrpl52	0.762201	1	0.0200905	Sp2	0.546174	1	0.52995	Thap7	1.43993	0.945637	0.345532	Vps41	0.606896	1	0.643675
Zfp729a	0.761108	1	0.590332	Tmtc2	0.545621	1	0.659926	Dicer1	1.43931	0.946236	0.526948	Ikbke	0.606519	1	1.74108
Rab2a	0.75962	1	0.0535758	Akr7a5	0.54559	1	0.0879712	Tmed9	1.43865	0.946575	0.151548	Terf2	0.606519	1	0.894719
2810474O19Rik	0.759347	1	0.0969754	Kat2b	0.545436	1	0.335097	Larp4	1.43735	0.947321	0.346598	Sept8	0.606331	1	1.73354
Psmb6	0.758861	1	0.0065409	Pias1	0.544944	1	0.14059	Slc35a1	1.43713	0.947321	0.280276	Tgfbrap1	0.606331	1	1.6677
Azin1	0.7588	1	0.313914	Smarcd2	0.544668	1	0.224537	Mrps22	1.43687	0.947362	0.482617	Cipc	0.606143	1	1.62734
Utrn	0.758739	1	0.108994	Ppp2r5c	0.544576	1	0.14593	Tk1	1.43542	0.949125	3.74284	Ddx31	0.605766	1	1.58811
Rpl6l	0.758679	1	0.0302692	Tcaf1	0.54436	1	0.453682	Cbx5	1.43509	0.949125	0.252398	Rpl10-ps3	0.605201	1	0.366479
Abtb1	0.757737	1	0.337047	Irf9	0.544053	1	0.0612408	Ddx56	1.43495	0.949125	0.324847	1110051M20Rik	0.605013	1	0.906221
Ostf1	0.757676	1	0.0453201	Zfp930	0.543592	1	0.622945	Emc8	1.43473	0.949125	0.268923	Dnajc15	0.605013	1	0.498699
Ehd3	0.756765	1	0.364163	H2-T23	0.543561	1	0.0455461	Raver1	1.43418	0.94925	0.419993	Tm6sf1	0.604824	1	1.76876
Pygm	0.75634	1	0.309332	Myo1g	0.542393	1	0.178984	Zfp644	1.43415	0.94925	0.262932	Cox5a	0.604824	1	0.306333
Tgif1	0.756188	1	0.199745	G730003C15Rik	0.542363	1	0.703341	Htra2	1.43397	0.94925	0.28977	Pcsk7	0.60426	1	1.70175
Irak3	0.756067	1	0.161552	Zer1	0.542332	1	0.174064	Plek	1.4299	0.955577	1.79417	Skint3	0.603883	1	1.67091
Pet100	0.756067	1	0.111861	Tbc1d17	0.542025	1	0.0776318	Glo1	1.42971	0.955577	0.229926	Elp2	0.60313	1	0.893373
Dnpep	0.754245	1	0.143345	Rbm33	0.541686	1	0.323044	Clint1	1.42931	0.955577	0.332132	Uba7	0.60313	1	0.284912
Dnajc28	0.754093	1	0.776289	Sipa1l3	0.541686	1	0.314136	Txnrd3	1.42892	0.955815	0.477904	Sgce	0.602942	1	0.632097
Ikzf4	0.753303	1	0.487938	Klhl36	0.541656	1	0.37747	Rprd2	1.4283	0.95651	0.315454	Map3k2	0.602377	1	0.995008
Exoc7	0.752392	1	0.221647	Mul1	0.541102	1	0.180385	Dgkz	1.42743	0.957156	0.288535	Frmd4a	0.602377	1	0.877
Fam219b	0.751785	1	0.273645	Pxk	0.541041	1	0.152008	Mms22l	1.42735	0.957156	0.895522	Slc37a4	0.601812	1	1.63357
Sigirr	0.751603	1	0.112593	Eftud1	0.54101	1	0.251769	Med12l	1.42724	0.957156	0.597611	Atp2c1	0.600494	1	0.908583
Mlf2	0.751269	1	0.0836443	Zbed5	0.540949	1	0.332964	Dnajc3	1.42684	0.957156	0.245936	Paxip1	0.600305	1	1.67815
Tmem80	0.751026	1	0.179762	Gm15658	0.540396	1	0.352924	Rpap3	1.42655	0.957156	0.438905	Cct3	0.600305	1	0.119049
Pycr2	0.750874	1	0.0702975	Ranbp10	0.540334	1	0.635833	Mdp1	1.42535	0.958897	0.281816	Apopt1	0.600117	1	0.630028
Cfap97	0.750479	1	0.0875084	Kdm7a	0.539965	1	0.19746	Nif3l1	1.42441	0.959636	0.604503	Edrf1	0.599552	1	1.84212
Erp44	0.749629	1	0.0866063	Fcgrt	0.539197	1	0.0738474	Nsg1	1.42426	0.959636	1.10632	Eif2b5	0.599364	1	1.07846
Ddrgk1	0.749568	1	0.0252683	Glg1	0.539105	1	0.0943979	Mrpl43	1.42383	0.959636	0.255229	Lap3	0.599364	1	0.426516
Adgrl4	0.748991	1	0.0995027	Gemin8	0.537414	1	0.379169	Eif3j1	1.42383	0.959636	0.329285	Frmd6	0.598799	1	1.6152
Cnpy3	0.748293	1	0.133842	Elp4	0.53723	1	0.200593	Hax1	1.42379	0.959636	0.302338	Pdcd6	0.598799	1	0.253273
Slc35d2	0.747412	1	0.806284	Gm5111	0.536707	1	0.181833	Arrb2	1.42346	0.95981	0.799489	Atxn7l1	0.597669	1	0.662703
Tceal1	0.747321	1	0.229169	Flywch1	0.536615	1	0.119662	Lman1	1.42056	0.963368	0.205132	Arl8a	0.597292	1	1.60125
Gm5148	0.746622	1	0.427345	Arl2bp	0.536554	1	0.208836	Mars	1.42038	0.963368	0.528956	Gpatch2	0.597104	1	0.612837
Mecp2	0.746592	1	0.211167	Bnip3	0.536338	1	0.185955	Mapre1	1.42019	0.963368	0.227849	Bag5	0.596728	1	0.49188
Lasp1	0.74641	1	0.254607	Fbxo32	0.536338	1	0.187517	Ckap2	1.41732	0.966735	2.39848	Gm5617	0.596163	1	0.886447
Ppwd1	0.746288	1	0.2406	Adck4	0.536062	1	0.404116	Mospd3	1.41514	0.969541	0.241926	D11Wsu47e	0.596163	1	1.65012
Fam110c	0.745894	1	0.245217	Gm20186	0.53557	1	0.681623	Nudt8	1.41503	0.969541	0.545942	Fam219b	0.595974	1	0.876493
Dnase1l1	0.745408	1	0.607117	Eif1b	0.53517	1	0.0231427	Sco2	1.41485	0.969541	0.314212	Sp110	0.595974	1	0.40774
Ttc5	0.745195	1	0.11581	Spi1	0.534925	1	0.0665379	Tia1	1.41427	0.970178	0.229398	Rbm42	0.595598	1	0.408559
Tbc1d10c	0.744861	1	0.0723921	Maml3	0.534709	1	0.344359	Mrps5	1.41365	0.970511	0.228253	H13	0.595598	1	0.297464
Pim2	0.744557	1	0.607497	Fam171a1	0.533972	1	0.461367	Shq1	1.4134	0.970511	0.456424	Vwa1	0.595409	1	1.64171
Stx8	0.74395	1	0.169222	Ift46	0.533695	1	0.223645	Paip1	1.41256	0.971193	0.859437	Rps29	0.595033	1	0.0687397
Taf6l	0.743859	1	0.0544362	Osgin2	0.533419	1	0.312515	Cdc6	1.41209	0.971634	1.22414	Smarcb1	0.594656	1	0.388163
Srcap	0.743798	1	0.247551	Dbnl	0.532988	1	0.060442	Aarsd1	1.41038	0.973483	1.36839	Tmem185b	0.594468	1	0.89443
Dnajc12	0.743646	1	0.314184	Dgcr14	0.532712	1	0.219753	Cd37	1.40991	0.973924	0.411394	Cd74	0.59428	1	0.861271
Rab5b	0.742401	1	0.286296	Ikzf5	0.531882	1	0.323478	Nelfe	1.40893	0.974874	0.332234	Card19	0.593903	1	0.335276
Rab17	0.742098	1	0.472328	Txlng	0.531667	1	0.0985108	Rad17	1.40791	0.976305	0.495735	Pus7	0.593338	1	0.864623
Ndn	0.741764	1	0.108647	Disp1	0.531482	1	0.851036	Sar1a	1.40744	0.976748	0.248934	Eif3l	0.592962	1	0.36966
Dsel	0.741642	1	0.804961	Ubald2	0.53099	1	0.0503788	Acadvl	1.40515	0.97798	0.296407	2700094K13Rik	0.592397	1	0.449177
Dctn5	0.741612	1	0.309934	Camkk1	0.530683	1	0.403136	Pum3	1.40373	0.979726	0.270824	Nrbf2	0.592208	1	0.619644
Inpp5k	0.740458	1	0.177309	Cbx2	0.530376	1	0.862622	Gm28875	1.40351	0.979726	0.55688	Nudt3	0.591832	1	1.08852
Zfp954	0.740397	1	0.382496	Pan3	0.530038	1	0.120013	Gps1	1.40159	0.982364	0.250363	Ywhab	0.591643	1	0.364045
Alkbh6	0.739972	1	0.214591	St3gal4	0.529976	1	0.135749	Tsen2	1.40115	0.982364	0.489901	Klf4	0.591643	1	0.71059
Guf1	0.738089	1	0.413064	Rbak	0.529761	1	0.367559	Cpsf3l	1.3997	0.983766	0.383298	Pnrc1	0.591455	1	0.475694
Vipas39	0.738089	1	0.374186	Zfand3	0.528716	1	0.223193	Zfp367	1.39803	0.985152	1.12983	Acy3	0.591267	1	1.5712
Zfp148	0.737603	1	0.0828497	Gm16140	0.528255	1	0.149644	Hccs	1.39563	0.989118	0.769682	Nfkbib	0.591078	1	0.892705
Sbds	0.737057	1	0.0312018	Whamm	0.528193	1	0.452646	Stat5a	1.39483	0.990165	0.291089	Pank3	0.590702	1	1.60816
Socs4	0.737057	1	0.350595	Acyp2	0.52807	1	0.199757	Psme4	1.39367	0.991878	0.566998	Sc5d	0.590702	1	1.22943
Lyrm5	0.736905	1	0.245931	Wrnip1	0.527886	1	0.202484	Ndufa5	1.3933	0.992126	0.217029	Krt10	0.58976	1	1.6036
Cnbd2	0.736753	1	1.10716	Laptm4a	0.527671	1	0.0559134	Erc1	1.39163	0.994776	0.486728	Park7	0.58976	1	0.280842
Psmg4	0.736297	1	0.0199116	Isca2	0.527609	1	0.108086	Angptl4	1.39116	0.994806	1.28746	Itga5	0.589572	1	1.91559
Prpf6	0.736146	1	0.164872	Mafg	0.527425	1	0.116493	Kri1	1.39043	0.995723	0.430499	Prim1	0.589195	1	1.06039
Ogfr	0.735933	1	0.0965872	Mnat1	0.526933	1	0.0696908	Gde1	1.38465	1	0.291817	Cul4a	0.589007	1	1.05473
Tefm	0.735599	1	0.269453	Diaph3	0.526841	1	0.107386	C030034L19Rik	1.38396	1	1.58164	Ldlrap1	0.589007	1	0.696179
Arhgap15	0.735022	1	0.128326	Gm12207	0.52678	1	1.58221	Gse1	1.38298	1	0.254586	Ccdc53	0.588819	1	0.410281
Tfe3	0.734658	1	0.517813	Dnajc10	0.526442	1	0.121023	Lage3	1.38186	1	0.233931	Dbi	0.588819	1	0.217648
Ripk3	0.734263	1	0.129752	Rbfox2	0.52555	1	0.232275	Zcchc17	1.38058	1	0.253027	Pfas	0.588631	1	1.538
Edc4	0.73402	1	0.467113	Taf6l	0.525028	1	0.0572116	Cntln	1.37975	1	0.587506	Rrn3	0.588631	1	1.73159
Irak4	0.733564	1	0.355601	Cib2	0.524813	1	0.793164	Trmt10c	1.37928	1	0.256269	Mogs	0.588442	1	1.6722
Tmod3	0.731499	1	0.0709856	Anapc4	0.524751	1	0.140524	Pten	1.37782	1	0.309459	Ttll1	0.587877	1	1.62488
Zdhhc6	0.731469	1	0.254688	Ddhd1	0.524659	1	0.844873	Nubpl	1.37724	1	0.696075	Iqce	0.587501	1	1.61557
Phxr4	0.73074	1	0.286273	Yrdc	0.523614	1	0.494529	Emc10	1.37266	1	0.190913	Suco	0.586559	1	0.949804
Il6ra	0.730649	1	0.481959	Stam	0.523522	1	0.268307	Cd151	1.36983	1	0.279024	Hilpda	0.586183	1	0.487989
Tcf7l1	0.730619	1	1.47909	Prss36	0.523153	1	0.736824	Clic4	1.36819	1	0.418526	Pitpnm1	0.585994	1	1.58322
Cryz	0.730345	1	0.441261	Cdkal1	0.523061	1	0.17018	Coa6	1.36776	1	0.250603	Akip1	0.585806	1	0.948093
2810405F17Rik	0.730345	1	1.128	Tgfbr1	0.522661	1	0.39357	Pcyox1l	1.36648	1	0.60451	Gnb2l1	0.585806	1	0.130518
Far1	0.729708	1	0.161148	Cep78	0.522261	1	0.348146	Myo1c	1.36296	1	0.732857	Flad1	0.584676	1	0.859099
Knop1	0.729495	1	0.0947339	Pttg1	0.522261	1	0.107215	Ost4	1.36132	1	0.166623	Rab9	0.5843	1	0.530056
Plec	0.728827	1	0.104074	Ago3	0.522016	1	0.240901	Dck	1.36122	1	0.99382	Rps24	0.583546	1	0.0432937
Ascc1	0.72828	1	0.185195	Bnip2	0.521739	1	0.0463403	Gipc1	1.36103	1	0.273983	Mpo	0.583358	1	1.41642
Rpl31	0.727309	1	0.00377492	Ttc28	0.52137	1	0.11128	Mcph1	1.36002	1	0.555817	Prr13	0.582605	1	0.11457
Atpaf1	0.727309	1	0.263967	Apaf1	0.521186	1	0.722901	Ift57	1.35983	1	0.324616	Pim2	0.582605	1	1.73409
Zfp142	0.726914	1	0.600995	Ankrd13a	0.521032	1	0.0423726	Orai2	1.359	1	0.65687	Dhx57	0.581475	1	1.98327
Nim1k	0.726792	1	0.458215	Galnt6	0.520878	1	0.119222	Tmem40	1.35642	1	0.225541	Ripk3	0.58091	1	0.494155
Znrd1	0.726549	1	0.0370949	Exoc8	0.52054	1	0.467607	Ddx55	1.35609	1	0.293938	Arhgef1	0.580722	1	0.405603
Nedd8	0.726367	1	-0.0217259	Ddb1	0.520233	1	0.0940706	Atg4b	1.35606	1	0.356271	Hn1	0.580157	1	0.377628
Akr1a1	0.72576	1	0.0141027	Acsf3	0.519956	1	0.387976	Topbp1	1.35602	1	0.882204	Katnal1	0.579969	1	1.51697
Dnm2	0.725608	1	0.173077	Cdc42	0.519587	1	0.0137655	Nelfa	1.35547	1	0.307725	Rmdn3	0.57978	1	0.818936
Txndc16	0.72491	1	0.731013	Amacr	0.519464	1	0.325815	Ptp4a3	1.35497	1	0.22421	Zcchc8	0.579592	1	0.849387
Zfp617	0.723664	1	0.517189	Zfp799	0.519249	1	0.77142	Tfpi	1.35442	1	0.323254	Aste1	0.579215	1	1.55675
Frrs1	0.723604	1	0.103529	Arid4a	0.519003	1	0.0419785	Sigmar1	1.35424	1	0.295016	Arid4b	0.578651	1	0.324202
Grb10	0.723209	1	0.103821	Mfn1	0.518358	1	0.227858	Coro1c	1.35413	1	0.453883	Snap23	0.578462	1	0.38506
Wwp2	0.722025	1	0.280771	Calml4	0.518081	1	0.36734	Apc	1.35348	1	0.411518	Vars	0.578086	1	0.348674
Thap2	0.720931	1	0.152445	Ppm1b	0.517497	1	0.270419	Rpia	1.35148	1	0.261867	Bivm	0.577709	1	1.55626
Rab6b	0.720871	1	0.442391	Eps8	0.517467	1	0.253738	Mrpl44	1.35079	1	0.245148	Tpm4	0.577144	1	1.82967
Arhgap21	0.72078	1	0.530598	Nudt1	0.517252	1	0.189139	Poldip3	1.35006	1	0.266021	C1ra	0.576956	1	1.53785
Aktip	0.720567	1	0.291975	Trim41	0.517252	1	0.172473	Ccdc61	1.34944	1	0.510911	Zmym5	0.575826	1	0.484297
Dnajc30	0.720324	1	0.174798	Nol12	0.516698	1	0.074327	Bin2	1.34926	1	0.196532	Ssna1	0.575638	1	0.311563
Prkcq	0.71999	1	0.174535	Zfp868	0.516545	1	0.205456	Rrp36	1.3489	1	0.320673	Itgb7	0.575638	1	1.51689
Ddx31	0.718472	1	0.696725	Fbxw5	0.516176	1	0.208713	Pafah2	1.34832	1	0.294211	Rnf5	0.574696	1	0.612996
Rassf2	0.718229	1	0.189581	Tmem229b	0.515315	1	0.26158	Cstf3	1.34799	1	0.329407	Dgkd	0.574131	1	1.44745
Ppil4	0.717743	1	0.0588025	Rab14	0.515285	1	0.0273191	Ywhab	1.34733	1	0.194143	Rab3il1	0.57319	1	1.49176
Ccpg1os	0.717196	1	0.379278	Epb41l2	0.515069	1	0.306123	Vcpip1	1.34563	1	0.363106	Otulin	0.57319	1	1.49336
Lrrc49	0.716467	1	0.435759	Pcca	0.514793	1	0.139762	Cd72	1.33981	1	0.541712	Scarb1	0.573002	1	0.824012
Nsmce2	0.716194	1	0.137814	Unkl	0.514362	1	0.349665	Thumpd1	1.33941	1	0.21744	Dnajb9	0.572248	1	0.560847
Phkb	0.715739	1	0.192704	D6Wsu163e	0.514239	1	0.314302	Rbbp4	1.33734	1	0.21816	Rbm14	0.572248	1	0.82294
Pnck	0.715617	1	0.373207	Ubqln2	0.513656	1	0.174377	Gpbp1	1.33672	1	0.20358	Slc39a9	0.57206	1	1.56308
S100a4	0.715131	1	0.302581	Alg14	0.513225	1	0.266384	Bfar	1.33607	1	0.230997	St6galnac6	0.571495	1	0.833414
Tnfsf14	0.714584	1	0.448639	Ubac2	0.513194	1	0.0667058	Ppp1r7	1.33596	1	0.270803	Sipa1	0.571495	1	0.632936
Glipr1	0.714524	1	0.0693866	Ogfod3	0.512979	1	0.194496	Ube2s	1.33534	1	0.237229	AW209491	0.571119	1	0.792301
Sertad1	0.713947	1	0.140529	Map3k2	0.512979	1	0.181343	Nupr1	1.3352	1	0.337035	Anapc11	0.571119	1	0.421018
Med20	0.713916	1	0.159627	Serpini1	0.512918	1	0.344089	Osbpl1a	1.33516	1	0.192243	Zbtb22	0.57093	1	1.48693
Atxn7	0.713339	1	0.181783	Hoxa9	0.512672	1	0.0534489	Utp23	1.33494	1	0.348237	Crtc2	0.57093	1	1.50125
Ergic3	0.71258	1	0.0499209	Tmem101	0.51261	1	0.122063	Pprc1	1.33349	1	0.826205	Klc1	0.570554	1	0.792259
Depdc5	0.712368	1	0.865921	Fyttd1	0.512426	1	0.0806343	Chd1	1.33345	1	0.25458	Acad12	0.570554	1	1.75211
Baz2a	0.712155	1	0.140594	Ing3	0.512272	1	0.110198	Pex2	1.33095	1	0.32482	Dgat1	0.569612	1	1.44738
Emc9	0.711335	1	0.436885	Fnbp1l	0.511965	1	0.0901464	Fdps	1.33062	1	0.294138	Vapb	0.569612	1	0.935643
Zfp383	0.710485	1	0.85057	Otos	0.511443	1	0.212529	Mpp6	1.32993	1	0.2728	Ccdc90b	0.569424	1	0.664937
Ibtk	0.710211	1	0.284158	Man2b2	0.510582	1	0.530702	Lair1	1.32971	1	0.59449	Ryk	0.569236	1	0.82448
Gm8730	0.709665	1	0.00341137	Wdr53	0.510213	1	0.205671	Bet1	1.32789	1	0.227811	Rbl1	0.568859	1	1.69869
Gm10138	0.709209	1	0.43175	Tmem245	0.510152	1	0.11819	Slfn9	1.32789	1	1.18318	Setd5	0.568859	1	0.586582
Mettl3	0.708147	1	0.190284	Zdhhc1	0.509906	1	0.331129	Ndc80	1.3272	1	1.72211	Mettl5	0.568482	1	0.436548
Sptbn1	0.706962	1	0.0465887	Sod1	0.509752	1	0.0436413	Plekhf2	1.32622	1	0.511651	Coq4	0.568482	1	0.976086
Plxnc1	0.70675	1	0.10648	Pde4a	0.509322	1	0.329592	Ccar1	1.32615	1	0.210845	Ttyh3	0.568482	1	0.829698
Atg4c	0.706689	1	0.434007	Tbc1d32	0.50926	1	0.737788	Gnpnat1	1.32608	1	0.313751	Rabl6	0.568482	1	0.582163
Rdh10	0.706598	1	0.520553	Slc25a15	0.509168	1	0.482568	Pld6	1.32546	1	1.6563	Stxbp4	0.568482	1	0.514242
Pisd	0.706385	1	0.142529	Mdn1	0.509137	1	0.168582	Ak6	1.32466	1	0.364973	Gtf2f1	0.568106	1	0.577236
Copz2	0.706324	1	0.293785	Synj1	0.509014	1	0.239472	Rps20	1.32426	1	0.0242719	Trmt2a	0.567917	1	0.543602
Scamp2	0.706264	1	0.130125	Myo18a	0.509014	1	0.173153	Tcp11l1	1.3235	1	0.712631	Abcb1b	0.567729	1	1.53262
Tmem37	0.70596	1	0.25963	Uaca	0.5084	1	0.300293	Pdzd8	1.32335	1	0.506774	Arl6	0.567353	1	0.84533
Stau1	0.70514	1	0.229329	Grk5	0.508246	1	1.08551	Sf1	1.32128	1	0.240686	Rab11fip5	0.567164	1	1.37238
2410022M11Rik	0.704958	1	0.471677	Rnpep	0.507754	1	0.101804	Tamm41	1.32121	1	0.708979	Yme1l1	0.566599	1	0.545975
Rpl7a	0.704381	1	0.00673418	Mcts1	0.507723	1	0.0478029	Cse1l	1.31994	1	0.507223	Fam120b	0.566599	1	1.38149
Tmem198b	0.703774	1	0.707499	Nup155	0.507416	1	0.302542	Cdc25a	1.31932	1	0.611718	Tcaf1	0.566411	1	1.42793
Mrpl30	0.703227	1	0.0209441	Prex1	0.507262	1	0.2234	Actr1b	1.31852	1	0.379363	Osbpl9	0.566223	1	0.413852
Taf1a	0.702741	1	0.81385	Gatc	0.507201	1	0.231111	Slc7a1	1.31779	1	0.520456	Xpa	0.566223	1	1.39923
Nupr1	0.702468	1	0.300725	Mvk	0.506586	1	0.249764	Taf15	1.31717	1	0.207086	Samd4b	0.564716	1	1.00932
Nfix	0.702377	1	0.0977558	Atp10a	0.506586	1	0.424585	9430016H08Rik	1.31677	1	0.343525	Ndufa2	0.564716	1	0.230832
Amz2	0.702286	1	0.14074	Tbc1d10a	0.506433	1	0.271504	Pbk	1.31666	1	3.65169	Ube2cbp	0.564716	1	1.55646
Ube2e1	0.702134	1	0.012523	Ntan1	0.506371	1	0.0356556	Dido1	1.31648	1	0.229982	Wipi2	0.56434	1	0.549338
Rasip1	0.702073	1	1.06079	Hddc3	0.506217	1	0.212666	Dnajc8	1.31637	1	0.173808	Rdh10	0.564151	1	1.47164
Atp6v1f	0.701496	1	0.00182434	Lpp	0.506187	1	0.174125	Lsm12	1.31492	1	0.260014	Tapbp	0.564151	1	0.512962
Rab10	0.70019	1	0.0528877	Stk3	0.505941	1	0.236501	Ddb1	1.31485	1	0.264095	Polr3k	0.563022	1	0.45295
Zfp637	0.700099	1	0.113466	Pcmtd2	0.505664	1	0.140821	Dcun1d5	1.31448	1	0.327292	Pigm	0.562645	1	1.28664
Adam17	0.700069	1	0.412046	Gm20696	0.504865	1	0.347388	Ppox	1.31434	1	0.750228	Map2k2	0.562645	1	0.428008
Ccdc122	0.699309	1	0.22123	Tbcd	0.503851	1	0.319651	Gnpat	1.31398	1	0.410575	Ankrd11	0.562457	1	0.321977
Plekhb2	0.699249	1	0.316526	Slc25a12	0.502836	1	0.265489	Rpa1	1.31354	1	0.366579	Hsd17b7	0.562268	1	1.4508
Slc12a9	0.698611	1	0.403382	Clock	0.502714	1	0.179424	Gtf2e1	1.31103	1	0.779754	Psmd14	0.561892	1	0.46539
Gdi1	0.698611	1	0.160086	Arhgef18	0.502529	1	0.22278	Cdc23	1.31103	1	0.312101	Taf11	0.561703	1	0.548118
Pfkm	0.698611	1	0.393462	Rnf13	0.502468	1	0.130666	Akr1c13	1.31081	1	0.247807	Csrp1	0.561139	1	0.479593
Emd	0.698186	1	0.0556462	Znrd1as	0.50216	1	0.167496	Nap1l4	1.3094	1	0.212234	Mrpl55	0.560762	1	0.452844
H2-Q4	0.698034	1	0.0878157	Letm2	0.502037	1	0.279591	Cep83	1.309	1	0.276386	Sec31a	0.560197	1	0.65445
Gm9493	0.697427	1	0.0113141	Eapp	0.502037	1	0.0547583	Asxl2	1.30849	1	0.27303	Pbx3	0.560009	1	1.43662
Mrpl40	0.697366	1	0.104476	Gm10260	0.501484	1	0.153405	Uso1	1.30714	1	0.419014	Ccdc88b	0.559632	1	1.41827
C330007P06Rik	0.69609	1	0.235038	Polr3b	0.501238	1	0.269657	Klhl9	1.30424	1	0.329323	Ppp1r10	0.559444	1	0.49284
Them4	0.695999	1	0.472981	Phtf2	0.501238	1	0.180211	Snrnp25	1.30311	1	0.269254	Lrwd1	0.559256	1	0.56104
Wdr20	0.695453	1	0.39691	Klhl20	0.501023	1	0.226957	Dnajc5	1.30271	1	0.243876	Pccb	0.559067	1	1.48946
Pbrm1	0.695392	1	0.0730081	Smarcc2	0.501023	1	0.107967	Xpot	1.30235	1	0.423134	Dpf2	0.559067	1	0.520081
4931406C07Rik	0.694967	1	0.176215	Cnot7	0.500531	1	0.100553	Usp40	1.30191	1	0.401863	Ankrd40	0.559067	1	1.38042
Parl	0.694481	1	0.0883549	Gm10767	0.500009	1	2.15266	Fes	1.30191	1	0.391711	Zfp184	0.559067	1	1.49678
Commd7	0.692932	1	0.0530351	Mpnd	0.499271	1	0.204055	Polr2j	1.30057	1	0.211188	Zc3h13	0.558879	1	0.324541
Sox5	0.691991	1	0.942841	Adamts6	0.498779	1	1.15546	Ech1	1.30053	1	0.207622	Rangap1	0.558502	1	0.530102
Cbx1	0.6919	1	0.0203035	Cnot11	0.498656	1	0.280786	Morc3	1.30006	1	0.216556	Gm19590	0.558314	1	0.217806
Uri1	0.690715	1	0.160666	Snhg12	0.498318	1	0.0722025	Spns3	1.30002	1	1.7775	H2-Eb1	0.557561	1	1.15095
Ppib	0.690624	1	0.0273149	Ptov1	0.497949	1	0.100026	Slk	1.29973	1	0.30945	Deaf1	0.557373	1	1.4735
Gm14302	0.690442	1	0.3558	Gapvd1	0.497888	1	0.0720555	Itgb1	1.29966	1	0.219936	Vma21	0.557184	1	0.453083
Lgals8	0.690412	1	0.1747	Bckdha	0.497642	1	0.0805757	Letm1	1.29929	1	0.409016	Dand5	0.556431	1	1.4209
Gm10244	0.690138	1	2.01085	Rmdn2	0.497427	1	0.66239	Brwd1	1.29919	1	0.397109	Txndc5	0.556431	1	0.564215
Htatip2	0.690108	1	0.232154	Btg3	0.496874	1	0.934154	Hnrnpul2	1.29915	1	0.297779	Snx1	0.556243	1	0.458052
4933434E20Rik	0.689561	1	0.125142	Mtmr1	0.496628	1	0.505801	2310061I04Rik	1.29897	1	0.46402	Arid3a	0.555678	1	0.785691
Pin4	0.689531	1	0.0786993	Foxj3	0.496597	1	0.270772	Eci1	1.2974	1	0.231834	Wdr91	0.555301	1	1.36631
Acot8	0.687557	1	0.247348	Lair1	0.496597	1	0.255711	Vasp	1.29617	1	0.196309	Ndufb10	0.554925	1	0.139872
Yeats2	0.686191	1	0.481739	Naa30	0.496228	1	0.707313	Ywhag	1.29591	1	0.28814	4833403J16Rik	0.55436	1	0.795643
E130102H24Rik	0.68531	1	0.493011	Fbxl14	0.496136	1	0.211041	Hddc2	1.29515	1	0.255229	Hnrnpa0	0.553042	1	0.785285
Spats2l	0.684551	1	1.18701	Creb1	0.496105	1	0.124464	Amd1	1.29493	1	0.38411	Nap1l1	0.552477	1	0.244823
Tspan9	0.68446	1	1.02002	Pgrmc1	0.496044	1	0.0519697	Tbc1d1	1.29344	1	0.798066	Itm2a	0.5521	1	0.545049
Toporsos	0.684217	1	0.179028	Cbr4	0.495952	1	0.213081	Ankrd54	1.29264	1	0.382021	Rab28	0.551912	1	0.563623
2210016F16Rik	0.683852	1	0.197676	Mrpl32	0.495675	1	0.0408846	Plscr3	1.29199	1	0.240893	Med4	0.551535	1	0.528683
Rsrc2	0.68364	1	0.0158717	6720427I07Rik	0.495583	1	0.792514	Cirh1a	1.29155	1	0.330951	Wdtc1	0.551159	1	1.41906
Nbr1	0.683002	1	0.259387	Fam132a	0.494845	1	0.0630707	Ubqln4	1.29112	1	0.515211	Cnot6	0.550782	1	0.785029
Taok1	0.682152	1	0.175464	Rps26	0.494507	1	0.0260862	Cnn2	1.28948	1	0.212607	Rnf11	0.550217	1	1.40355
Mlkl	0.681058	1	0.428827	Pole	0.494476	1	0.23011	Wdr4	1.28927	1	0.472759	Vps72	0.550217	1	0.345662
Nmi	0.68033	1	0.0996661	Serpinf1	0.494353	1	0.0478081	Gmfb	1.28901	1	0.38788	Ddx11	0.550029	1	1.30961
Zeb2	0.680056	1	0.0603936	Pam	0.4942	1	0.157805	Pigyl	1.28868	1	0.249058	Impa1	0.54984	1	0.428872
Kmt2c	0.680026	1	0.10615	Srfbp1	0.494046	1	0.229002	Blvra	1.28698	1	0.258812	Ermard	0.549652	1	0.745241
1700096K18Rik	0.679753	1	0.290778	Pdcd6ip	0.493677	1	0.0505809	Rbm26	1.28632	1	0.332275	Gemin8	0.549464	1	1.44992
Actr3	0.67954	1	0.0224699	Pphln1	0.493462	1	0.18879	Wrnip1	1.28621	1	0.5616	Gm4707	0.549087	1	1.48095
Arih1	0.678811	1	0.19465	Tmem120a	0.492817	1	0.32871	Thoc5	1.2861	1	0.51037	Lzic	0.548522	1	0.778826
Fut8	0.678477	1	0.0778375	Apeh	0.492571	1	0.186331	Pgm2	1.28585	1	0.328465	4930486L24Rik	0.548146	1	1.42528
Ttc38	0.678416	1	0.466502	Gm20604	0.49211	1	0.313092	Smo	1.28581	1	0.506298	Kpna1	0.547957	1	0.757783
Gadd45a	0.678204	1	0.26145	Pygb	0.492017	1	0.33292	Nelfcd	1.28552	1	0.38136	4930447C04Rik	0.547581	1	1.37575
Cdk17	0.677839	1	0.193356	Lysmd2	0.490573	1	0.148518	Mrps15	1.28549	1	0.238888	Exoc6	0.547393	1	0.769857
Zfp532	0.677809	1	0.828524	Rin2	0.490173	1	0.625865	Pip4k2b	1.2853	1	0.781219	Atg4d	0.547204	1	1.43291
Ifi44	0.677627	1	0.145042	Zmpste24	0.489835	1	0.106641	Cd34	1.28381	1	0.287506	Akirin1	0.547204	1	0.788827
Sh2d3c	0.676655	1	0.337335	Rmnd5a	0.489805	1	0.21448	Smc5	1.2832	1	0.226152	Fcgrt	0.546263	1	0.439758
Lrrc57	0.676351	1	0.383912	Bloc1s6	0.489436	1	0.131577	Harbi1	1.28127	1	0.501921	Zscan12	0.546074	1	1.43167
Fyco1	0.67623	1	0.366073	Fbxl3	0.489036	1	0.289641	Vapa	1.2804	1	0.253773	Gfer	0.545886	1	0.545207
AI987944	0.6762	1	0.272092	Scyl1	0.488944	1	0.208195	Nabp2	1.28036	1	0.247452	Tmco3	0.545509	1	1.40273
Ugp2	0.676169	1	0.155648	Gbe1	0.488852	1	0.126096	Arih2	1.27851	1	0.555162	Mavs	0.545321	1	1.36502
Pabpc1	0.675835	1	0.0186858	Gm17056	0.48876	1	1.22302	Ctu2	1.27804	1	0.37585	Tbc1d1	0.544945	1	1.38876
Dhrs1	0.675046	1	0.174047	Inppl1	0.488729	1	0.740023	Tmem107	1.27785	1	0.949452	Mapre1	0.544568	1	0.261509
Irf6	0.673618	1	0.383014	Slc7a8	0.488544	1	0.494507	Zmym1	1.27771	1	0.591087	Hmgn3	0.544568	1	0.210736
Hus1	0.673527	1	0.435485	Fahd2a	0.48836	1	0.110417	Riok1	1.27684	1	0.279105	Gmpr2	0.544568	1	0.548946
Mta1	0.67292	1	0.181403	Csnk1g2	0.488206	1	0.131035	Fam98a	1.27684	1	0.513197	Nln	0.54438	1	1.32582
Rabl2	0.67292	1	0.335606	Rsad1	0.487991	1	0.219485	B4galt7	1.27655	1	0.914149	Tchp	0.544191	1	1.35586
Pdgfd	0.672434	1	0.808047	Polr1e	0.487561	1	0.228103	Il17ra	1.27647	1	0.398229	Lrrcc1	0.542685	1	0.397924
Ift46	0.671553	1	0.372735	Mblac2	0.487438	1	0.223502	Zfp451	1.27564	1	0.325265	Epb41l4b	0.54212	1	0.763933
Rps19bp1	0.670247	1	0.118175	Tmem263	0.487407	1	0.32988	Sephs1	1.27535	1	0.735695	Ppp2r3c	0.54212	1	0.798078
Meis3	0.670096	1	1.10617	Snx33	0.486885	1	0.725452	L3mbtl2	1.27484	1	0.596127	2900076A07Rik	0.541932	1	1.37109
Ctso	0.669124	1	0.0877005	Arvcf	0.486854	1	1.09703	Jarid2	1.2748	1	0.290938	Gsdmd	0.541555	1	0.729091
Phpt1	0.669063	1	0.0814898	Fstl1	0.486424	1	0.109607	Kansl1	1.274	1	0.334957	Nqo2	0.541367	1	1.38625
Tor4a	0.668729	1	0.346585	Tor1aip1	0.485901	1	0.0695465	Trub2	1.27262	1	0.483893	Mmaa	0.541367	1	1.32855
Chd9	0.668638	1	0.0589911	Ogg1	0.48587	1	0.295168	Cit	1.27131	1	1.95789	Trmt44	0.541179	1	1.28763
Lmbr1l	0.668608	1	0.467025	Slu7	0.485625	1	0.0592737	Nubp2	1.27001	1	0.288135	Ccdc8	0.53986	1	0.764067
Tnfrsf13c	0.668274	1	0.522131	Otud1	0.485317	1	0.809805	Cetn2	1.2671	1	0.23746	Thnsl1	0.539484	1	1.41175
Zfos1	0.668091	1	0.00762383	Lat	0.485256	1	0.0657848	Hnrnpl	1.26517	1	0.23427	Fbxo4	0.539107	1	1.36371
Scmh1	0.666846	1	0.184931	Pcbd1	0.484457	1	0.0793965	Lin9	1.2651	1	0.61465	Rad9b	0.539107	1	1.53717
D2hgdh	0.666482	1	0.396913	Cdk5rap1	0.484272	1	0.255304	Add3	1.26317	1	0.398438	Irf8	0.538919	1	1.33601
Prdm11	0.666026	1	0.424159	Zfp184	0.482766	1	0.287698	Pitpnc1	1.26317	1	0.240251	Ssfa2	0.538354	1	1.28622
Arhgdib	0.665055	1	0.00361323	Dnajc4	0.482705	1	0.201735	Tacc3	1.26187	1	1.1582	Naa10	0.537977	1	0.404354
Sat1	0.664933	1	0.0365117	Bambi	0.482705	1	0.432096	Heatr1	1.26078	1	0.896013	Nsmaf	0.537977	1	0.779675
BC029722	0.664842	1	0.181682	Ppp6r1	0.482213	1	0.288281	Ralgapb	1.25987	1	0.901698	Smim11	0.537601	1	0.318117
Rps3	0.663992	1	0.00841138	Bsdc1	0.481936	1	0.106575	Bcl7a	1.25827	1	0.365666	Cyp26b1	0.537413	1	1.26587
Sirt3	0.662838	1	0.0451571	Tsc1	0.481936	1	0.131736	Rmi2	1.25754	1	2.08909	Dock2	0.537224	1	0.302
Vnn1	0.662564	1	1.04971	Col4a2	0.481905	1	0.158555	Rpp21	1.25289	1	0.207173	Zfp943	0.537224	1	1.34122
Ctnna1	0.661441	1	0.155655	Soga1	0.481905	1	0.23087	Rad51	1.25234	1	1.94156	App	0.536659	1	0.789302
Ube2g1	0.661259	1	0.0840508	Cast	0.481783	1	0.133773	AI314180	1.25071	1	0.253873	Def6	0.535153	1	0.351161
Cic	0.660439	1	0.148076	Limd1	0.481414	1	0.133157	Cab39	1.25042	1	0.331105	Spred1	0.534965	1	0.770179
Dcaf12	0.660348	1	0.26756	Hic2	0.481199	1	0.611466	Pdcd11	1.24762	1	0.290976	Mapk3	0.534776	1	0.521242
Mageh1	0.659983	1	0.172133	R3hdm2	0.481199	1	0.219197	Ppp1cc	1.247	1	0.313131	Ccdc34	0.534776	1	0.480865
Ctdsp1	0.659497	1	0.177837	Tyw1	0.480276	1	0.109806	Copz2	1.24668	1	0.480568	Dnaaf2	0.534211	1	0.755577
Cd68	0.659194	1	0.902311	Rpl27a	0.479508	1	0.00196587	Lman2	1.24602	1	0.205526	Myo9a	0.534023	1	1.3199
Cdc42bpa	0.659103	1	0.236208	Lrrc42	0.479447	1	0.191488	Zdhhc21	1.24584	1	0.593678	Srp19	0.534023	1	0.319651
Zfp65	0.65892	1	0.446348	Stard9	0.479354	1	1.1407	Ccdc88a	1.24555	1	0.220918	Cdk13	0.533458	1	0.722215
Tpt1	0.657554	1	0.00749466	Fhdc1	0.479108	1	0.769077	Ankrd26	1.24515	1	0.332974	Leng1	0.533458	1	0.776601
Pdzd11	0.657068	1	0.131158	Rbm4b	0.479047	1	0.0494124	Cyb561d2	1.24493	1	0.342999	Smpd1	0.533458	1	0.766984
Mterf2	0.656248	1	0.449428	Acp1	0.478924	1	0.0388788	1600002K03Rik	1.24471	1	0.580248	Got2	0.53327	1	0.509444
Isca2	0.655823	1	0.144893	Saal1	0.478893	1	0.149528	Fam3c	1.24453	1	0.350393	Rps27rt	0.532705	1	0.252842
Reps1	0.655246	1	0.326193	Fem1b	0.478555	1	0.292671	Trub1	1.24431	1	0.31584	Opa3	0.532517	1	0.741097
Basp1	0.655215	1	0.309279	Rfx5	0.478494	1	0.238981	Cd69	1.2442	1	1.54541	B3gnt5	0.53214	1	1.36244
Zfp646	0.654699	1	0.181555	Gpr137b-ps	0.478463	1	0.411997	Slc20a1	1.24395	1	1.04424	Slc30a6	0.531575	1	1.28185
Chd3	0.653819	1	0.312144	Brf1	0.478094	1	0.273553	Scaf11	1.2437	1	0.191941	Sergef	0.530634	1	1.29709
Cacul1	0.653211	1	0.44843	Hpgd	0.478063	1	1.1024	Pikfyve	1.24348	1	0.870998	Dusp11	0.530634	1	0.322669
Pyroxd1	0.652482	1	0.282572	Pcna	0.477357	1	0.0995561	Hdgfrp3	1.24221	1	0.327584	Ssrp1	0.530634	1	0.187081
Prmt6	0.651996	1	0.281702	Rnf130	0.477326	1	0.108609	2610318N02Rik	1.24119	1	1.68623	Gypc	0.530445	1	0.409509
Ehbp1l1	0.651753	1	0.175191	Tbc1d19	0.476496	1	0.332461	Heatr3	1.23912	1	0.395336	Fkbp3	0.529692	1	0.30105
Dock1	0.651662	1	0.298103	Ccdc90b	0.476465	1	0.0959876	Zbtb1	1.23828	1	0.317213	Itfg2	0.529504	1	0.545189
Dnajb11	0.651207	1	0.0756689	Gne	0.476281	1	0.1752	Ehmt2	1.23795	1	0.309083	Otud7b	0.529316	1	0.766304
Rpl10	0.650478	1	0.0699476	Ddhd2	0.476004	1	0.0810309	Larp1b	1.23632	1	0.664436	Ikbkap	0.528939	1	0.72856
Copz1	0.650417	1	0.0819233	Crb3	0.475973	1	0.602905	Pdcd2l	1.2333	1	0.412287	Mettl1	0.528939	1	0.402372
Anapc4	0.649992	1	0.165065	Idnk	0.47582	1	0.0546942	Sil1	1.23239	1	0.481373	Mms22l	0.528939	1	1.36466
Eid1	0.649658	1	0.115153	Glmp	0.475574	1	0.0432281	Ufm1	1.23163	1	0.255971	Sde2	0.527621	1	0.316705
Hspa13	0.649081	1	0.371625	Oxld1	0.475328	1	0.130996	Fam192a	1.23134	1	0.223302	Pign	0.527056	1	0.753417
Batf	0.64899	1	0.121241	Comt	0.47499	1	0.0352669	Rpe	1.22971	1	0.434568	Lyrm4	0.526679	1	1.30753
Matr3	0.648838	1	0.0232823	Snx4	0.474898	1	0.0779161	Zfp213	1.22887	1	0.522986	Nans	0.526303	1	0.519992
Nsun6	0.648717	1	0.265133	Ldlrap1	0.474621	1	0.101995	Fancl	1.22858	1	0.488989	D15Ertd621e	0.526303	1	1.19719
Nfyb	0.648504	1	0.166681	Tpp2	0.474498	1	0.110581	Mrps23	1.22785	1	0.225612	Fam204a	0.526114	1	0.634622
Map3k3	0.64814	1	0.522415	Dhx32	0.474437	1	0.193416	Fasn	1.22742	1	0.622109	Tnfrsf13c	0.525926	1	1.27376
Fam171b	0.646561	1	0.693125	Arid3a	0.474314	1	0.180516	Suz12	1.22731	1	0.434968	Ifi27	0.525926	1	0.382265
Mterf3	0.645285	1	0.239203	Clk3	0.473054	1	0.104758	Arl5a	1.22713	1	0.819612	Fcf1	0.525738	1	0.473434
Ttc33	0.64483	1	0.149073	Actn4	0.472039	1	0.0769601	Mrpl46	1.22636	1	0.242618	Tcerg1	0.525738	1	0.401512
Ppp2r3c	0.644799	1	0.241592	Aven	0.471548	1	0.564011	3830406C13Rik	1.22622	1	0.252854	Fam96b	0.525173	1	0.349853
Fads1	0.643706	1	0.208453	Snx21	0.471425	1	0.191184	Iqgap2	1.22455	1	0.190448	Gm8186	0.525173	1	0.512664
Batf2	0.643554	1	0.59921	Nle1	0.470964	1	0.209057	Rad54l	1.22436	1	1.26964	Ctnna1	0.524796	1	0.502969
Tceal5	0.642856	1	0.503789	Ptpn14	0.470902	1	0.181393	BC003331	1.224	1	0.271518	Psmd6	0.524796	1	0.370802
Crispld1	0.642856	1	0.245523	Kctd18	0.470871	1	0.23353	Snapc5	1.22258	1	0.217669	Rad52	0.524608	1	1.36349
Cacfd1	0.642552	1	0.36272	Athl1	0.470318	1	0.187605	Zkscan8	1.22229	1	0.85381	Ptpn7	0.524608	1	0.378739
Rsf1	0.642431	1	0.0934126	4833418N02Rik	0.470226	1	0.229719	Acat1	1.22142	1	0.193269	Pycr2	0.52442	1	0.364088
Ermard	0.642188	1	0.236962	Slfn5	0.470041	1	0.156709	Cul5	1.21975	1	0.215643	Ube4a	0.52442	1	0.735773
Pias4	0.642005	1	0.190206	Traf1	0.469181	1	0.158027	Cndp2	1.21851	1	0.523361	Slc39a7	0.524043	1	0.517151
Pbx2	0.641003	1	0.318638	Peli2	0.468658	1	0.584564	Nipsnap3b	1.21811	1	0.232552	Arhgap21	0.524043	1	1.26769
Eif3f	0.64073	1	-0.0099306	Ccnh	0.468597	1	0.0319338	Lrpprc	1.21775	1	0.942736	Zfp516	0.524043	1	1.59372
Fam69a	0.640214	1	0.204137	Bmp1	0.468535	1	0.720232	Osbpl2	1.21713	1	0.37495	Tpst1	0.523478	1	1.34403
Cldn34c1	0.639667	1	0.749632	Apex2	0.468351	1	0.394344	Gm10269	1.21659	1	0.250588	Rbpms2	0.523478	1	1.32216
Snx3	0.639394	1	-0.0169103	Hipk3	0.468351	1	0.382334	Alkbh2	1.21648	1	0.729667	BC051226	0.52329	1	1.25438
Csf1	0.63912	1	0.918187	Hebp1	0.46832	1	0.136032	Rap2b	1.21622	1	0.309478	Sesn1	0.522913	1	0.405728
4930550C14Rik	0.638908	1	1.0025	Bag1	0.467798	1	0.214205	Prim2	1.21579	1	1.16976	Ubfd1	0.522725	1	0.503923
Rhobtb2	0.638452	1	0.789532	0610030E20Rik	0.467275	1	0.0689313	Ap5m1	1.21572	1	0.828544	Rbm48	0.522537	1	0.733839
Ankrd33b	0.638331	1	0.228676	Capn5	0.466814	1	0.343182	Thoc1	1.21528	1	0.301401	Mgat1	0.522348	1	0.494265
Kif13a	0.638058	1	0.542081	Hars	0.466784	1	0.145335	Ppil3	1.21463	1	0.240529	Fadd	0.522348	1	1.35223
Mapk3	0.637025	1	0.161682	Tada3	0.466661	1	0.0650334	Cyp20a1	1.21426	1	0.322099	Rrs1	0.521972	1	1.64641
Smg8	0.63663	1	0.72816	Dpagt1	0.466384	1	0.193357	Dapp1	1.21386	1	0.140478	Usp32	0.521972	1	1.31627
Rps6ka5	0.63578	1	0.450432	Pitpnm1	0.4662	1	0.376749	Rrp7a	1.21368	1	0.235112	Mpdz	0.521784	1	1.33907
Iars2	0.634899	1	0.304451	Ube4a	0.465616	1	0.157519	Ndufs4	1.21328	1	0.174811	Hspa4l	0.521407	1	0.529958
Mob4	0.634596	1	0.0786068	Lactb	0.465523	1	0.394669	Zfp91	1.21288	1	0.24038	mt-Nd2	0.521407	1	0.107851
Naip5	0.634535	1	0.468743	Parvb	0.464724	1	1.74615	Tmem126a	1.21281	1	0.270778	Clpb	0.52103	1	0.749557
Mettl22	0.633897	1	0.372601	Kctd14	0.464632	1	0.217675	Sh2d5	1.21135	1	1.21042	Rps14	0.520089	1	0.0629032
1110046J04Rik	0.633411	1	1.19114	Dnajc18	0.46454	1	0.306263	Cdc37l1	1.2111	1	0.27159	Atf3	0.5199	1	1.14081
Rnf7	0.633229	1	-0.00275116	Cyr61	0.464171	1	2.56923	Sox12	1.20997	1	0.755845	Tfpt	0.5199	1	0.743213
Mob3b	0.632683	1	0.772949	Ubl3	0.463833	1	0.111111	Zkscan6	1.20957	1	0.489289	Aqp1	0.519712	1	1.13829
Hist1h2ac	0.631954	1	0.859531	Sdc4	0.463495	1	0.182033	Pecr	1.20946	1	0.376743	Zfp74	0.519524	1	1.29587
C030037D09Rik	0.631893	1	0.309715	Mllt6	0.463003	1	0.473018	Fam120a	1.20888	1	0.254825	Dach1	0.519147	1	0.747398
Ap4b1	0.631802	1	0.595202	Mettl10	0.462911	1	0.0822527	Mdc1	1.20885	1	0.500171	Hps5	0.518771	1	1.18622
9930021J03Rik	0.631377	1	0.371386	Klhdc9	0.46288	1	0.994832	Bin1	1.20852	1	1.17596	Dag1	0.518771	1	0.728346
Sox18	0.631316	1	1.10748	Herpud1	0.462481	1	0.0608668	Cstf1	1.20808	1	0.459053	Rpl41	0.518582	1	0.0748286
Vars	0.630587	1	0.0838856	Bbs7	0.46245	1	1.1929	Dnaaf2	1.20805	1	0.378461	Plpp7	0.518394	1	1.25911
Ndufaf3	0.630435	1	0.135457	Drosha	0.461866	1	0.271855	Atl3	1.2079	1	0.640559	RP23-218K15.3	0.518206	1	1.15406
Armc7	0.630435	1	0.699061	Cdc42ep4	0.461681	1	0.43827	Marf1	1.20623	1	0.908956	Dpcd	0.517829	1	0.514552
Fam104a	0.630132	1	0.0259762	Gm42670	0.461466	1	0.69136	Tmem199	1.20612	1	0.407792	Jagn1	0.516699	1	0.337445
Kdsr	0.629919	1	0.222876	Ube4b	0.461343	1	0.165172	Lrrfip2	1.20605	1	0.303998	Zfp143	0.516323	1	1.21882
Phf3	0.629889	1	0.0760223	Rpf1	0.46122	1	0.103231	Cdca4	1.20434	1	0.492071	Slc2a1	0.516135	1	0.676084
3830406C13Rik	0.629767	1	0.147673	Ric3	0.460974	1	0.608714	Tor1b	1.20372	1	0.320709	Stag2	0.516135	1	0.388504
Pi4ka	0.629464	1	0.461259	Cep135	0.460606	1	0.328073	Cars	1.20369	1	0.532183	Plbd2	0.515946	1	0.721797
Pde9a	0.628795	1	1.26071	Atg3	0.460329	1	0.0848881	Aqr	1.20158	1	0.259648	Itgb1	0.515758	1	0.353567
Fam173b	0.628674	1	0.311078	Mink1	0.460267	1	0.139098	Dhodh	1.20129	1	0.36067	Adpgk	0.51557	1	1.23125
Nek9	0.628097	1	0.281011	Zfp239	0.460145	1	0.273177	Tpx2	1.20045	1	2.45288	Ndufaf7	0.514816	1	0.735292
Clic1	0.62755	1	0.00593474	Jsrp1	0.459776	1	0.599871	Fam69b	1.19944	1	0.473431	Zfp809	0.514251	1	1.3169
Chil1	0.627277	1	0.977916	Hoxb3os	0.459745	1	0.202556	Zkscan1	1.19769	1	0.24104	Jak2	0.514063	1	1.29833
Ints3	0.626943	1	0.360776	Grasp	0.459745	1	0.352289	Sppl2a	1.19646	1	0.240317	Acadm	0.513687	1	0.277777
Atp6ap1	0.626852	1	0.139372	Cyth2	0.459684	1	0.112632	Gm21092	1.19522	1	0.212267	Pef1	0.513687	1	0.592316
Herc6	0.62673	1	0.156134	Trip6	0.459622	1	0.0808863	Rbfa	1.19438	1	0.234449	Srprb	0.513498	1	0.836962
Cyb5a	0.626366	1	0.0111911	Maff	0.459192	1	0.764146	Nup160	1.19358	1	0.855933	Slx4ip	0.51331	1	1.27551
Smim7	0.625334	1	0.0723839	Cyyr1	0.459069	1	0.60242	Toe1	1.19355	1	0.336977	Usp11	0.513122	1	1.28338
Rock1	0.625273	1	0.0510528	Las1l	0.459069	1	0.0596151	Mycbp	1.19344	1	0.428457	Cyba	0.512557	1	0.220404
Mthfs	0.624058	1	0.287149	Btrc	0.458669	1	0.172603	Prkg1	1.19322	1	0.469948	Rhno1	0.512368	1	0.732236
F11r	0.623754	1	0.266024	Rufy1	0.458516	1	0.342511	Atp6ap1	1.19184	1	0.234612	Tek	0.51218	1	1.2701
Terf1	0.622631	1	0.151687	Pak1ip1	0.457317	1	0.0647619	Trip12	1.19151	1	0.302684	Mterf4	0.511992	1	0.707173
Ndufv3	0.621993	1	0.00766356	Il21r	0.457194	1	0.0545052	Babam1	1.19115	1	0.27533	Pom121	0.511615	1	0.704975
Cpd	0.62175	1	0.593365	Clec14a	0.456733	1	0.355069	Tmem39b	1.19079	1	0.385016	Nabp1	0.511239	1	0.698427
Dgka	0.621629	1	0.576077	Casp1	0.45661	1	0.100887	Smg5	1.19064	1	0.597667	Commd5	0.511239	1	0.724786
Haus8	0.620991	1	0.412432	Nadk	0.456241	1	0.0745681	Gpank1	1.1905	1	0.410809	Fam98b	0.510862	1	0.383642
Gm13212	0.6209	1	0.370885	Nin	0.456241	1	0.28195	Prkag1	1.18981	1	0.250134	Tmem168	0.510862	1	0.714233
Eif4ebp1	0.620748	1	0.0286099	Nsf	0.45618	1	0.101631	Fip1l1	1.18941	1	0.195587	Lrch1	0.510674	1	1.21
Tbpl1	0.62005	1	0.189472	Gpcpd1	0.455842	1	0.103072	Ptpn11	1.18912	1	0.248227	Afp	0.510297	1	1.26009
Ahnak	0.619898	1	0.419403	Rwdd4a	0.455565	1	0.0805066	Cyb5b	1.18875	1	0.274274	Leng8	0.510109	1	0.641855
Itpk1	0.619473	1	0.267449	Trit1	0.45535	1	0.251366	Fam175a	1.18813	1	0.493485	Rnf144a	0.509167	1	1.22443
Triqk	0.618683	1	0.241906	Tank	0.455012	1	0.201037	Zfp62	1.18661	1	0.446034	0610011F06Rik	0.508979	1	0.395477
Dkkl1	0.618622	1	0.107711	Txnrd2	0.453997	1	0.0934315	Ddx41	1.18628	1	0.259637	Zc3h12a	0.508791	1	1.17041
Gpr171	0.618045	1	0.106183	Cspp1	0.453967	1	0.1072	Ctr9	1.18581	1	0.24912	Tmem159	0.507661	1	0.520136
Bbc3	0.617954	1	0.836356	Bdh2	0.453905	1	0.115176	Qrsl1	1.18574	1	0.780763	Eci1	0.507661	1	0.279365
Atp6v1h	0.617347	1	0.129479	Pten	0.453598	1	0.119597	Vprbp	1.18177	1	0.310104	Ptgs1	0.507473	1	0.338303
Adi1	0.617104	1	0.212644	Gfi1	0.45326	1	1.09804	Mthfd2	1.18156	1	1.42317	Vps39	0.507473	1	1.26665
Igtp	0.616891	1	0.120037	Gm5611	0.453229	1	0.116163	Cdc20	1.18108	1	0.922827	Kif21a	0.507473	1	1.22979
Lipa	0.616861	1	0.330176	Slc46a2	0.45286	1	1.34628	Zfp397	1.17894	1	0.292058	Agpat3	0.507284	1	1.29764
Traf7	0.616739	1	0.207336	Mob1a	0.452676	1	0.0833461	Ubfd1	1.17698	1	0.256185	Cox7b	0.506719	1	0.0622309
Maf1	0.616375	1	0.0647855	Zfp664	0.452676	1	0.0819422	Anapc16	1.17694	1	0.19546	Fam117b	0.506531	1	1.14066
Ptov1	0.616162	1	0.0924854	Ndufs2	0.452522	1	0.033089	Bid	1.17665	1	0.386118	Rps21	0.506155	1	0.0507974
Fxyd1	0.616041	1	0.603856	Ralb	0.452338	1	0.152838	Cdv3	1.17661	1	0.412254	Tcf7l2	0.505778	1	0.709379
Emg1	0.615798	1	0.0197854	Grcc10	0.452215	1	0.07753	Cdk13	1.17647	1	0.343265	Stx7	0.505778	1	0.499681
Cpne8	0.615464	1	0.177516	Rictor	0.452123	1	0.221154	Wdyhv1	1.17636	1	0.302012	Slc39a3	0.505778	1	1.18453
Cbx8	0.61431	1	0.433657	Gm26767	0.452092	1	1.05003	Ctsg	1.17516	1	1.60997	Phip	0.505213	1	0.247393
Pik3c2a	0.613915	1	0.493205	Gm17430	0.45203	1	0.222696	Elac2	1.17458	1	0.617879	Mrpl10	0.50446	1	0.676593
Gnptg	0.613824	1	0.234843	Tnfaip3	0.452	1	0.91398	Rai1	1.17422	1	0.379494	Zfp36l1	0.50446	1	0.855158
Gipc1	0.61349	1	0.112075	Cldnd1	0.451846	1	0.0263383	Fdx1l	1.17411	1	0.220789	Mrps15	0.504083	1	0.307729
Casc3	0.61349	1	0.315854	Eif3k	0.451784	1	0.00472699	Tmod1	1.17349	1	1.93671	Sertad1	0.50333	1	0.509698
P2ry14	0.613338	1	0.154491	Usp11	0.451569	1	0.306614	Marc2	1.17164	1	0.18805	Pla2g15	0.50333	1	1.25607
Pcnt	0.613126	1	0.166856	P4htm	0.451569	1	0.539165	Dach1	1.17135	1	0.325252	Pdlim5	0.502765	1	1.17658
Stx5a	0.612761	1	0.0733024	Vps33a	0.451416	1	0.365438	Cnot4	1.17047	1	0.220829	Socs7	0.502577	1	1.20906
Cbl	0.612549	1	0.157257	Hivep3	0.451354	1	0.106039	Cdk5rap2	1.16964	1	0.557558	Akt3	0.5022	1	1.16254
Erbb2ip	0.612336	1	0.177433	Dnajc14	0.451262	1	0.130743	Arpc5l	1.16949	1	0.212187	9530068E07Rik	0.502012	1	0.543558
Magee1	0.612032	1	0.618584	C2cd3	0.450616	1	0.219742	Lrrc8c	1.16935	1	0.750399	Zeb2	0.50107	1	0.467677
Aldoa	0.61185	1	0.0119937	Cyp26b1	0.450309	1	0.256402	Man2b1	1.16913	1	0.348487	Chchd5	0.50107	1	0.481148
Ciao1	0.611789	1	0.155979	Nbea	0.449264	1	0.177726	Meaf6	1.1676	1	0.241525	Prkcd	0.50107	1	0.510786
Dync1i2	0.609846	1	0.0742665	Ap1s2	0.448158	1	0.536852	Naa40	1.16709	1	0.454105	Trip11	0.500882	1	0.490763
Strip1	0.608115	1	0.293473	BC029722	0.44659	1	0.0858365	Gsn	1.16506	1	0.679366	Slc16a2	0.500694	1	1.20699
B230219D22Rik	0.607902	1	0.0768073	Clstn3	0.446529	1	0.209175	Sec11a	1.1648	1	0.203226	Tra2b	0.499376	1	0.158325
Ppp2r1b	0.607751	1	0.35771	Hnrnph2	0.446252	1	0.0480032	Tst	1.16473	1	0.422825	Vprbp	0.499187	1	0.669801
Zbtb8os	0.607659	1	0.132637	Plppr3	0.445975	1	0.242534	Palb2	1.16426	1	0.968277	Nol10	0.499187	1	1.4259
Gjb3	0.607629	1	0.406513	Lrrc45	0.445945	1	0.1768	Cnp	1.16375	1	0.289372	Gm4890	0.499187	1	1.22316
Gm26510	0.607356	1	0.361776	Swt1	0.445945	1	0.062299	Sacs	1.16371	1	0.823294	Noc3l	0.498058	1	0.661685
Tiprl	0.607174	1	0.0756706	Gm20661	0.445914	1	1.32645	Dhx9	1.16175	1	0.234117	Mapk12	0.498058	1	1.5279
Emsy	0.606931	1	0.19107	Rftn1	0.445484	1	0.0622602	Ep300	1.16172	1	0.328865	Usp47	0.498058	1	0.710331
Slco3a1	0.606931	1	0.333436	Slc31a2	0.445391	1	0.405561	Myg1	1.16139	1	0.233001	N4bp1	0.497304	1	0.703161
AW146154	0.60684	1	0.389649	Hk2	0.445176	1	0.284203	Eml4	1.16128	1	0.386286	Aars	0.495798	1	1.25099
Ankrd12	0.606779	1	0.0457264	Gfpt1	0.445176	1	0.095827	Tuba8	1.16106	1	3.10449	Spint2	0.49561	1	0.349649
Ap1m1	0.604957	1	0.120353	Prkx	0.4445	1	0.283196	Fahd1	1.15979	1	0.386381	Socs5	0.495233	1	1.19015
Tmem194	0.604714	1	0.341693	Pgm2l1	0.444408	1	0.20456	Usp5	1.15895	1	0.291153	Tfip11	0.495045	1	1.22257
Dmd	0.604683	1	0.975755	Rcor3	0.443732	1	0.145503	Rc3h2	1.15739	1	0.368184	2510046G10Rik	0.494856	1	0.817845
Ppp1r13b	0.604441	1	0.234092	Chid1	0.443547	1	0.226352	Nob1	1.15688	1	0.214153	Haus7	0.494103	1	0.65422
9330160F10Rik	0.603651	1	1.15976	Khdrbs1	0.443086	1	0.0440822	Coa7	1.15681	1	0.361485	Mtch2	0.493538	1	0.325613
Tmem161b	0.603529	1	1.03485	Arhgap12	0.443025	1	0.190582	Nudt6	1.15648	1	0.358779	Rbx1	0.493538	1	0.0135601
Sh3bp1	0.603074	1	0.166962	Zfyve16	0.442533	1	0.213098	Ipo13	1.15612	1	0.880908	Zfp385a	0.49335	1	1.16476
Slc25a20	0.602861	1	0.199347	Zfp385a	0.442287	1	0.288391	D1Ertd622e	1.15605	1	0.607518	Slc35b4	0.492785	1	1.20416
Scp2	0.602618	1	-0.0193319	Gba2	0.442041	1	0.299663	Racgap1	1.15554	1	0.811877	Dph6	0.492785	1	0.763053
Pot1a	0.602345	1	0.263156	Naif1	0.441918	1	0.786468	Nup210	1.15485	1	0.472528	Csnk2a1	0.492785	1	0.35539
Zbtb4	0.602284	1	0.332544	Trim68	0.441611	1	0.281175	Psmb1	1.15463	1	0.0826375	Deptor	0.492409	1	0.672117
Mpi	0.602193	1	0.8417	Ercc6	0.441488	1	0.407415	Gna13	1.15456	1	0.26873	Dnajc14	0.492409	1	0.694205
Mpp7	0.601464	1	0.310011	Sqle	0.441457	1	0.0757657	Naa35	1.1543	1	0.204175	Ugdh	0.492409	1	0.652548
Eno1	0.601373	1	0.0613015	Kif3c	0.441181	1	0.773588	Ckap5	1.15427	1	0.346394	Daxx	0.492032	1	0.701758
Fbxo32	0.601161	1	0.347266	Fbxw8	0.440812	1	0.457469	Ethe1	1.15314	1	0.265673	Gosr1	0.491655	1	1.1616
Csf3r	0.6011	1	0.40236	Ocel1	0.440597	1	0.162255	Tars2	1.15227	1	0.370552	Med28	0.491655	1	0.11398
Rbm12b2	0.601039	1	0.847917	Ppm1h	0.440197	1	0.235109	Parvg	1.15223	1	0.307957	Psme2	0.491279	1	0.304373
Odf2l	0.600888	1	0.454398	Mthfr	0.440197	1	0.655368	Mxi1	1.15132	1	0.863384	Chtf8	0.49109	1	0.67854
Sphk2	0.600857	1	0.344214	Taf4a	0.439336	1	0.608035	Cux1	1.15052	1	0.183442	Sh2b1	0.490525	1	0.667906
Mrpl48	0.600766	1	0.0899279	Eif3j2	0.439091	1	0.582695	Gpd1l	1.15023	1	0.904793	Mtx1	0.490337	1	0.540898
Comt	0.600402	1	0.0268786	Gm5577	0.43906	1	0.563568	Tada2a	1.15023	1	0.577299	Alg2	0.489772	1	0.626471
Fam219a	0.600219	1	0.774342	Fam109a	0.438937	1	0.566759	Daxx	1.14802	1	0.354709	Dnajc3	0.489396	1	0.315389
Pigt	0.599946	1	0.289718	Sbno2	0.438599	1	0.428058	Gsk3b	1.14791	1	0.19903	Pcyt2	0.489019	1	0.368382
Slamf8	0.599885	1	1.06679	Tnfrsf13b	0.438537	1	0.0575228	Commd6	1.14791	1	0.221657	RP23-60P18.10	0.488642	1	0.664414
Idh3g	0.599612	1	0.0182882	Mum1l1	0.437861	1	0.595161	Gba	1.14758	1	1.10898	Sec16a	0.488078	1	1.15347
Parp3	0.599551	1	0.341589	Rb1	0.437523	1	0.505728	Scaf8	1.14733	1	0.490914	Pglyrp1	0.488078	1	1.1293
Tom1	0.599187	1	0.537882	Zbtb24	0.437492	1	0.199577	Ndufv2	1.14725	1	0.176831	Nufip1	0.487889	1	0.470186
Arhgap39	0.599096	1	0.57086	Stt3a	0.437369	1	0.0839821	Dnajc17	1.14656	1	0.627783	Clec2d	0.487889	1	0.300285
Cyp4v3	0.598245	1	0.300669	Bin2	0.43697	1	0.0307943	Klc1	1.14558	1	0.405832	Upf3a	0.487701	1	0.457294
Phf11b	0.598094	1	0.359126	Rpl27	0.436908	1	0.141353	Smyd5	1.14551	1	0.393189	Ccnd3	0.487701	1	0.290676
Sc5d	0.597699	1	0.183387	Mkks	0.436908	1	0.0918603	Dph3	1.14547	1	0.193832	Ptbp1	0.487701	1	0.344844
Capg	0.597547	1	0.00923318	Rasd1	0.436878	1	0.844106	Sik2	1.14515	1	0.42426	Miip	0.487324	1	1.13604
Ing1	0.597365	1	0.0913927	Hist1h2al	0.436785	1	1.1894	Ndufb2	1.14431	1	0.217648	Nim1k	0.487136	1	1.15893
Tmem170b	0.59694	1	0.736135	Zzz3	0.436724	1	0.0998359	Tsnax	1.14413	1	0.215836	Ezr	0.486383	1	0.4858
Iqcb1	0.596606	1	0.133302	Zfp944	0.43657	1	0.34562	Colgalt1	1.14336	1	0.281341	Ebp	0.486006	1	0.5733
Faf2	0.596363	1	0.0751175	Mical3	0.43614	1	0.288205	Polr2k	1.14326	1	0.199147	Zcchc11	0.485253	1	0.335071
Slc48a1	0.59615	1	0.0128899	St6galnac2	0.435925	1	0.957139	Smyd2	1.1418	1	0.23686	Man2b1	0.484876	1	0.66449
Mettl20	0.595938	1	0.325544	Dap3	0.435617	1	0.032693	Nudcd1	1.14155	1	0.581924	Pigh	0.4845	1	0.657133
Cat	0.595634	1	0.101494	Gm20707	0.435617	1	0.961391	Zfp422	1.14093	1	0.221121	Pofut2	0.484123	1	0.749608
Rorc	0.59533	1	0.498455	Pabpc4l	0.435249	1	0.292885	Hnrnph2	1.13999	1	0.213715	Zbtb17	0.484123	1	1.09671
Fam122b	0.594784	1	0.727894	Fbxo4	0.435095	1	0.282302	Cntrl	1.13995	1	0.239242	Atp6v1h	0.483747	1	0.459877
Svip	0.59451	1	0.300575	Fam129a	0.434788	1	0.156525	Opa3	1.13813	1	0.354582	Ogg1	0.48337	1	1.16361
Ctsc	0.594298	1	0.0955315	Snrpn	0.434726	1	0.533472	Htt	1.1378	1	0.48742	Zscan21	0.482805	1	1.17448
Fnip1	0.593964	1	0.253568	Rragb	0.434572	1	0.374462	Ctdspl2	1.13777	1	0.239283	Znfx1	0.482617	1	1.10277
Nsun7	0.593113	1	0.51676	Impact	0.434204	1	0.141934	Fam58b	1.13762	1	0.22172	Med24	0.482429	1	1.12075
Mterf4	0.59205	1	0.209126	Rab3a	0.434173	1	0.288864	Ube2f	1.1374	1	0.24622	Nek6	0.482429	1	1.09927
Trip4	0.591899	1	0.287861	Pvrl4	0.43362	1	0.295642	Bag4	1.13624	1	0.383419	Btbd10	0.481675	1	1.18904
Abca3	0.591808	1	0.358737	Sfxn3	0.43322	1	0.146023	Gm10146	1.13595	1	0.59683	Lmo2	0.481675	1	0.196845
Ap4s1	0.591504	1	0.0796017	Zfp87	0.433128	1	0.254284	Ndufa11	1.1357	1	0.1861	Btk	0.48111	1	0.609584
Tmem40	0.591322	1	0.0362425	Abca3	0.432237	1	0.228081	Mpo	1.13552	1	1.27585	Cyb5d2	0.480922	1	1.08369
Rpusd4	0.590957	1	0.175639	Plcl1	0.432021	1	0.308636	Dimt1	1.13544	1	0.296594	Adam17	0.480922	1	1.16124
Pglyrp1	0.590897	1	0.323965	Trim30b	0.43196	1	0.205781	Uqcrfs1	1.13446	1	0.164337	Prpf19	0.480734	1	0.306089
Cdh11	0.590228	1	3.88361	Brwd3	0.431837	1	0.29336	Mbd2	1.13424	1	0.697903	Adam10	0.480734	1	0.533707
Ip6k2	0.589834	1	0.19406	Sos1	0.431653	1	0.260803	Ppie	1.1337	1	0.179055	Col4a2	0.480734	1	0.607575
1110002L01Rik	0.58956	1	0.536492	Zgpat	0.431622	1	0.145409	Slc25a28	1.13297	1	0.57751	Fam3c	0.480357	1	0.72451
Sertad3	0.58953	1	0.210221	Pea15a	0.431222	1	0.289158	Hibch	1.13275	1	0.268717	Ptpre	0.480169	1	0.212675
Alas1	0.589439	1	0.229913	Plxna4os1	0.431038	1	0.033892	Brms1l	1.13239	1	0.698974	Pcdh7	0.479981	1	1.03504
B9d1	0.589317	1	0.464828	Trip10	0.430915	1	0.29607	Gtf3c6	1.13224	1	0.246916	Frmd4b	0.479792	1	1.12305
Pramef8	0.589317	1	0.567597	Katnb1	0.430116	1	0.328051	Pomt1	1.13068	1	0.728456	Cirbp	0.479792	1	0.124363
Runx1t1	0.588862	1	0.348314	Sdhaf1	0.429962	1	0.0818028	Rrp8	1.13057	1	0.272514	St7l	0.479604	1	0.65681
Dhdds	0.588801	1	0.272776	Klhl26	0.429255	1	0.293596	Bag1	1.12901	1	0.413766	Cast	0.479604	1	0.670794
Cuedc1	0.58868	1	0.142754	Klhl12	0.428671	1	0.217366	Pnpo	1.12836	1	0.327435	Lpcat3	0.479604	1	0.471455
Coro7	0.588649	1	0.107301	Dcun1d5	0.428548	1	0.101541	Rrm2	1.12825	1	2.30328	Tfg	0.479039	1	0.403642
Gbp5	0.588376	1	0.307733	Smim6	0.428487	1	0.109651	Pnkp	1.12781	1	0.38463	Pigv	0.479039	1	1.09584
Slc28a2	0.587192	1	0.792961	Tmod3	0.428395	1	0.0452086	3110009E18Rik	1.12727	1	0.628208	Btc	0.478474	1	1.37354
Tmem222	0.586189	1	0.0915211	Mrps6	0.428149	1	0.102257	Map2k2	1.12669	1	0.212542	Ppp1r21	0.478286	1	1.08326
Rubcn	0.586068	1	0.552525	Ccdc43	0.42778	1	0.0949741	Tomm7	1.12658	1	0.148823	Camta1	0.478098	1	0.457719
Tfcp2	0.585461	1	0.449088	Srsf6	0.427565	1	0.0344087	A630001G21Rik	1.12625	1	0.455353	Mlx	0.478098	1	0.659434
Elovl5	0.584307	1	0.346539	Tbc1d25	0.427411	1	0.458328	Faf1	1.12458	1	1.01986	Rmi1	0.478098	1	1.13692
Gpr108	0.584124	1	0.144999	Polm	0.427165	1	1.83626	Pak1	1.124	1	0.213566	Alas1	0.478098	1	0.672739
Camk2g	0.583942	1	0.139961	Rbl2	0.426858	1	0.137426	Nek7	1.12396	1	0.28963	Abhd11	0.477909	1	0.487643
Tap1	0.583912	1	0.0934954	Hnrnpll	0.426274	1	0.123429	Ccdc66	1.1232	1	0.334819	Il3ra	0.477533	1	1.0788
Btbd6	0.583396	1	0.530504	Aldh4a1	0.426212	1	0.525036	Tm2d3	1.1232	1	0.212003	Tcta	0.476403	1	1.0689
Galm	0.583365	1	0.436071	Atp11b	0.425966	1	0.0670454	Asrgl1	1.12312	1	0.260473	2700062C07Rik	0.475461	1	0.647801
Zc3h7a	0.583213	1	0.141256	Hspa4	0.425843	1	0.0561266	Brcc3	1.12298	1	0.261698	Rasgrp2	0.475273	1	0.310582
Tmem261	0.583213	1	0.0291014	Stxbp6	0.425628	1	0.621951	Pdxk	1.12163	1	0.539491	Adora2a	0.474708	1	1.11022
Tfpt	0.583092	1	0.203977	Phldb2	0.425229	1	0.45673	Cnppd1	1.12149	1	0.280379	Acsl1	0.474708	1	1.10432
Zfp688	0.583062	1	0.26322	Cops7a	0.425167	1	0.038854	Mrpl27	1.12142	1	0.198121	Zfp592	0.474708	1	1.1679
Ampd2	0.582879	1	0.108063	Copa	0.425137	1	0.0680563	Slc39a11	1.12113	1	0.283488	Tollip	0.474708	1	1.06019
Ap3s2	0.582758	1	0.171887	Trappc8	0.424952	1	0.408994	Htatsf1	1.12	1	0.252636	Stxbp2	0.47452	1	0.318883
Ccdc18	0.582636	1	0.433178	Grwd1	0.424799	1	0.121112	Wwp1	1.11956	1	0.486985	Ccdc124	0.473955	1	0.736988
Eps15	0.582302	1	0.204014	Smagp	0.424799	1	0.166326	Slc4a2	1.11876	1	0.703168	Plgrkt	0.473955	1	0.229486
Foxa3	0.581968	1	0.262184	Nhsl2	0.424737	1	0.448096	Rfwd3	1.11669	1	0.738846	Lpp	0.473578	1	0.64462
Eif4ebp2	0.581391	1	0.325296	Gmeb1	0.42443	1	0.190615	Rasal3	1.11666	1	0.359607	Slc25a39	0.473578	1	0.637464
Ica1l	0.581361	1	0.7303	Id3	0.424399	1	0.954055	Rnf157	1.1164	1	0.983611	Dbnl	0.47339	1	0.26355
Hmga1	0.580116	1	0.408454	Smc6	0.424368	1	0.0448255	Samm50	1.11633	1	0.195872	Arhgap18	0.472825	1	0.635202
Vamp4	0.579843	1	0.168327	Zfp46	0.423969	1	0.60276	Cenpc1	1.1156	1	0.284068	Gstt3	0.472637	1	1.09418
Rundc1	0.579509	1	0.425336	Gpr89	0.423938	1	0.142245	Rab6a	1.11513	1	0.218456	Hmox2	0.472637	1	0.274092
Timm10b	0.579326	1	0.0553066	Dcaf6	0.423569	1	0.273775	Rpl15	1.11455	1	0.110028	Ddx28	0.472449	1	1.11921
Pygl	0.579326	1	0.145237	Aco1	0.423415	1	0.304711	Nlgn2	1.11371	1	0.633138	Zfp26	0.472449	1	1.13852
Stx6	0.577717	1	0.107053	N4bp2	0.423385	1	0.0885362	Fgfr1op2	1.11335	1	0.202702	Max	0.471695	1	0.386227
Gulp1	0.577413	1	0.316641	Tmem259	0.422831	1	0.212224	Wdr82	1.11215	1	0.379295	Swt1	0.471695	1	0.274711
Ccnl2	0.577261	1	0.0206981	Susd6	0.42154	1	0.26363	Rfc3	1.11197	1	0.248906	Mrps17	0.471695	1	0.311323
Ube2z	0.577231	1	0.359456	Thg1l	0.421172	1	0.316329	Mrpl16	1.1119	1	0.23539	Fkbp5	0.471695	1	1.37349
Ormdl2	0.577049	1	0.0695846	Rfx1	0.420618	1	0.876702	Brd7	1.11124	1	0.246788	Ripk1	0.471507	1	0.452767
Trim30d	0.576836	1	0.173346	Clip2	0.420219	1	0.451303	Rmnd1	1.11117	1	0.314588	Phka2	0.471507	1	1.08918
Nicn1	0.576715	1	0.306333	Parp6	0.419881	1	0.396139	Tut1	1.10997	1	0.63665	Srrt	0.471319	1	0.309606
Vma21	0.576381	1	0.0964795	Tcea1	0.419635	1	0.0396731	Tsen54	1.10899	1	0.513994	Foxj3	0.470754	1	1.16189
Gabbr1	0.576381	1	0.206606	Gbp5	0.418959	1	0.190069	Mto1	1.10895	1	0.332921	Snx10	0.470754	1	0.226733
Prcp	0.57635	1	0.0546627	Gas2l3	0.418866	1	0.171003	Alg3	1.10848	1	0.552065	Tnfaip8	0.470566	1	0.228173
Srp14	0.57632	1	0.00387729	Setd5	0.418713	1	0.0671607	Fam210a	1.10775	1	0.498411	Ndufa1	0.470189	1	0.261549
Jade1	0.576138	1	0.108683	Fam210a	0.418682	1	0.205962	Glrx2	1.10713	1	0.199573	Ik	0.469436	1	0.323969
Rps27a	0.576107	1	0.0120157	Bmpr2	0.418467	1	0.132578	Arhgef7	1.10706	1	0.528472	Tmem135	0.469436	1	1.09234
Bmpr2	0.575348	1	0.289128	Lhpp	0.418098	1	0.828821	A230050P20Rik	1.10699	1	0.368301	Phf20l1	0.469436	1	0.630106
Sqstm1	0.575348	1	0.0840445	Ptger4	0.417791	1	0.13525	Kank3	1.10663	1	0.563216	Cnot7	0.469059	1	0.543753
Mtfr1	0.575075	1	0.253295	Plag1	0.41776	1	0.198401	Cactin	1.10608	1	0.261162	Nup153	0.469059	1	1.06967
March2	0.574589	1	0.126817	Gm5616	0.417637	1	0.928992	1110008P14Rik	1.10597	1	0.900498	Yeats4	0.468683	1	0.349589
Acadl	0.574376	1	0.0780458	Vangl1	0.417453	1	0.664139	Hnrnpll	1.10328	1	0.27443	Zbtb45	0.468494	1	1.05611
Psmf1	0.574164	1	0.212004	Ets1	0.417391	1	0.244109	Chd3os	1.10296	1	0.739958	Zfpl1	0.468118	1	0.42732
2510002D24Rik	0.573921	1	0.0528261	Hps5	0.417176	1	0.265065	Eif2b5	1.10234	1	0.386551	Triobp	0.467929	1	0.396347
Dhps	0.573314	1	0.287128	Cdkn2aip	0.416715	1	0.150717	Pmvk	1.1023	1	0.252673	Ruvbl1	0.467741	1	0.201315
Zfp235	0.573222	1	0.54686	Wrap53	0.416684	1	0.334895	Rad51ap1	1.10168	1	1.87054	Nudt5	0.467364	1	0.539281
Epb41l3	0.572919	1	1.2913	Arhgap25	0.416623	1	0.10622	Knop1	1.10114	1	0.223661	Atl3	0.466988	1	1.04738
Mr1	0.572494	1	0.503746	Rsl1d1	0.4165	1	0.0220018	Nr2c2ap	1.10088	1	0.246724	Sf1	0.466799	1	0.366745
Tubb2a	0.572099	1	0.549187	Rreb1	0.416408	1	0.203104	Ift27	1.10078	1	0.327451	Ino80d	0.466799	1	0.447674
Evi5l	0.572099	1	0.734745	Tnpo2	0.416192	1	0.302968	Zdhhc18	1.10078	1	0.450387	Arid5a	0.466799	1	1.07934
Hk3	0.571856	1	0.774267	Cd93	0.415701	1	0.0583819	Mtfr2	1.10074	1	0.946744	Sclt1	0.466235	1	1.11361
Abcb8	0.571552	1	0.234569	Cdk14	0.415547	1	0.287549	Rtn3	1.10041	1	0.211412	Foxn3	0.46567	1	0.268705
Zbtb8b	0.571522	1	1.55301	Agpat3	0.415055	1	0.201138	Trmt13	1.1003	1	0.278352	Naa35	0.463787	1	0.309567
Zfp827	0.570732	1	0.816648	Daglb	0.414502	1	0.156877	Slc43a1	1.09892	1	0.535081	Hmox1	0.463033	1	0.928184
Pbx3	0.569761	1	0.480947	Taok3	0.414502	1	0.0452171	2610507B11Rik	1.09823	1	0.298602	Fbl	0.462092	1	0.177138
Ints1	0.56973	1	0.502138	Lactb2	0.414379	1	0.243036	Irf3	1.09747	1	0.218881	Timp3	0.461339	1	1.36246
Stard3	0.569275	1	0.25229	Atg10	0.414041	1	0.150073	Imp3	1.09692	1	0.140939	Gstt2	0.461339	1	0.619096
Itsn2	0.569032	1	0.182264	Laptm4b	0.41401	1	0.140632	Kmt2d	1.09645	1	0.623716	Armc5	0.460209	1	1.00009
Zfp831	0.568971	1	0.658729	Apool	0.413795	1	0.111792	Tanc2	1.09467	1	0.864034	Nudt21	0.460021	1	0.257156
Cdadc1	0.568546	1	0.319579	Xylt1	0.413641	1	0.616626	P2rx1	1.09463	1	0.362637	Pla2g16	0.459644	1	0.335927
Kctd20	0.568394	1	0.196601	Hif3a	0.413641	1	0.491269	Akr7a5	1.09394	1	0.213158	Brk1	0.459644	1	0.294984
Mrps24	0.56721	1	-0.00472344	Ilk	0.413396	1	0.0545979	Zfp433	1.09365	1	0.464035	Prkd3	0.459267	1	0.598567
Selm	0.567027	1	0.0975024	Man2c1	0.412996	1	0.218567	Capn15	1.09336	1	0.302979	Chst15	0.459267	1	1.31932
Mfsd8	0.566967	1	0.553233	Khnyn	0.412904	1	0.272334	Snx27	1.09333	1	0.28775	Smap2	0.458891	1	0.55951
Zfyve21	0.566693	1	0.144484	Hmbox1	0.412873	1	0.15386	BC004004	1.09082	1	0.209678	Flcn	0.458514	1	0.610224
Chd7	0.565995	1	0.396292	Elac1	0.412719	1	0.337749	Senp6	1.08991	1	0.180135	Adat2	0.458514	1	0.968626
Mrpl9	0.565813	1	0.0700834	Cyp4f13	0.412719	1	0.121606	Ctdspl	1.08788	1	0.484777	Pdha1	0.457573	1	0.31718
Slc22a15	0.565722	1	0.360864	Mcm3ap	0.412658	1	0.185305	C330006A16Rik	1.08704	1	0.523341	Osgepl1	0.457384	1	1.00442
Rarg	0.565388	1	0.355656	Slc22a18	0.412166	1	0.31597	Snrpa	1.08675	1	0.187571	Emc9	0.457384	1	1.08056
Pick1	0.565205	1	0.140081	Tgds	0.411889	1	0.167212	Leo1	1.08617	1	0.248015	Efcab14	0.457384	1	0.331974
Strada	0.564659	1	0.59286	B4galt3	0.411859	1	0.271669	Pak2	1.08551	1	0.179654	Ythdf3	0.456819	1	1.06449
Rfc1	0.564355	1	0.0365683	Itfg2	0.411582	1	0.100118	Cdkn2aipnl	1.08548	1	0.279478	Emc2	0.456631	1	0.331694
Rell2	0.563353	1	0.480758	2700097O09Rik	0.411551	1	0.17292	Pom121	1.08428	1	0.362264	Rsbn1	0.456255	1	0.278402
Ski	0.563262	1	0.192884	Acy1	0.411398	1	0.254525	Zdhhc3	1.08337	1	0.313094	Atxn7	0.456066	1	0.433593
Alg5	0.563019	1	0.100929	Leng1	0.411336	1	0.129762	Zfp787	1.08239	1	0.232969	Necap1	0.45569	1	0.9644
Gm5914	0.562533	1	0.310986	Papd5	0.411336	1	0.465238	Trap1	1.08064	1	0.219023	Ndufaf5	0.455501	1	1.06635
Abhd4	0.56232	1	0.176861	Fhit	0.411305	1	0.790906	Slc10a7	1.07941	1	0.756208	Rnase6	0.455501	1	0.588912
Yme1l1	0.561895	1	0.082595	Sirt1	0.411152	1	0.404547	Whsc1	1.07941	1	0.273337	Mbd3	0.455125	1	0.34001
Fam129b	0.561257	1	0.447972	Snapc1	0.410906	1	0.138683	Creb1	1.07697	1	0.246235	Clcf1	0.454748	1	1.04592
Pnp2	0.560741	1	1.18694	Abcg1	0.410537	1	0.0711479	Cdca3	1.07661	1	2.9156	Dnajc17	0.454372	1	0.980709
Asah2	0.56065	1	0.499381	Nsun7	0.410476	1	0.321432	Ergic1	1.0765	1	0.352973	Dgcr2	0.454372	1	0.602989
Sgpl1	0.56065	1	0.631893	Lyrm4	0.410445	1	0.255573	Mrpl50	1.07646	1	0.222962	Bet1l	0.454372	1	0.391584
Eya2	0.560559	1	0.239998	6330416G13Rik	0.409769	1	1.37234	Urod	1.07639	1	0.20854	Siah1b	0.453618	1	1.08034
Acad12	0.560529	1	0.456786	Hnmt	0.409584	1	0.155465	Thop1	1.07494	1	0.398899	Gbp3	0.453618	1	1.02957
[truncated: 12,398 more rows]

## Sheet: HSC_replicate2
Quiescent_n	Quiescent_s	Quiescent_p	Quiescent_l	Activated_n	Activated_s	Activated_p	Activated_l	Metabolism_n	Metabolism_s	Metabolism_p	Metabolism_l	Interferon_n	Interferon_s	Interferon_p	Interferon_l
Txnip	22.3262	1.70618e-107	0.651763	Nr4a1	41.5145	0	2.66871	Ptma	29.1618	9.33215e-183	0.782061	Oasl2	9.08229	1.04113e-15	3.70272
Clec2d	21.1812	1.06909e-96	1.04905	Junb	37.5821	3.3238e-305	1.97941	Mcm3	28.8904	1.24287e-179	2.79006	Iigp1	9.05866	1.04113e-15	4.20992
Rsrp1	16.6481	1.26216e-59	0.524613	Hes1	36.4031	1.99975e-286	3.07332	Mcm6	28.7437	5.71296e-178	2.67859	Gm4951	8.49842	8.93037e-14	4.00486
Fam212a	9.87968	8.73965e-21	0.568181	H3f3b	35.334	6.9669e-270	0.805818	Dut	27.659	8.57765e-165	2.32065	Xaf1	8.4793	8.93037e-14	3.48575
Mycn	9.80573	1.8034e-20	0.650309	Ier2	34.6808	4.83809e-260	1.41515	Ran	26.6863	2.13807e-153	1.38844	Ifit1	8.41169	1.27446e-13	5.67572
Rpl17	9.7908	2.0684e-20	0.0757288	Klf2	33.2011	2.73181e-238	2.39729	Mcm7	26.5935	2.12213e-152	2.97666	Isg15	8.3794	1.39792e-13	5.23615
Ogt	9.762	2.72016e-20	0.317606	Fos	33.1249	2.93184e-237	1.7091	Tuba1b	25.2342	3.80565e-137	1.74794	Gbp7	8.28261	2.71431e-13	3.09518
Rbm5	9.56768	1.7253e-19	0.477035	Smad7	32.6831	5.34238e-231	1.81233	Mcm2	25.1454	3.12896e-136	3.37311	Ifitm3	8.24576	3.23441e-13	1.35367
Pik3ip1	9.56759	1.7253e-19	0.432455	Rgs2	32.1132	5.057e-223	2.20406	Mcm5	25.1086	7.01543e-136	3.59781	Ifi203	8.18266	4.61561e-13	2.31392
Cited2	9.0927	1.42363e-17	0.405545	Nr4a2	30.9371	5.9695e-207	2.31137	Tipin	24.1595	9.34606e-126	2.72482	Parp14	8.17628	4.61561e-13	3.56368
Ppp1r10	8.0435	9.90353e-14	0.628405	Zfp36	28.7602	9.66873e-179	1.3917	Ppia	24.1446	1.21854e-125	0.569784	Stat1	8.02024	1.51275e-12	3.32476
Rps24	7.95387	1.97942e-13	0.0524759	Cebpb	26.8235	2.25868e-155	1.49366	H2afz	23.7903	5.5357e-122	1.19362	Ifi47	7.98842	1.79579e-12	2.76947
Meis1	7.86724	3.86247e-13	0.224595	Klf9	26.6603	1.64809e-153	1.54389	Stmn1	23.5605	1.18973e-119	1.44851	Igtp	7.97766	1.80872e-12	3.64123
AI467606	7.84815	4.4086e-13	0.758881	Mcl1	26.3709	3.33104e-150	1.06698	Lig1	23.0253	2.92655e-114	3.47491	Ly6e	7.96708	1.82978e-12	1.74467
Rpl9	7.77668	7.62279e-13	0.0516209	Ier3	26.0694	8.52778e-147	1.77971	Ranbp1	22.7543	1.36715e-111	1.42739	Irf7	7.81057	5.98417e-12	4.46074
Rpl37a	7.55825	4.05128e-12	0.0542192	Ccnt1	25.9832	7.56366e-146	1.61911	Nasp	22.4955	4.53158e-109	2.91958	Rtp4	7.72541	1.09868e-11	3.47029
Dapp1	7.55824	4.05128e-12	0.279459	Ubc	25.9781	8.12209e-146	0.739495	Tubb5	21.9822	3.95352e-104	1.15787	Zbp1	7.58715	3.03295e-11	4.57845
Crlf3	7.54747	4.34629e-12	0.301458	Pnrc1	25.7011	9.95353e-143	0.795485	Anp32b	21.7601	4.85117e-102	0.953764	Ifi44	7.5489	3.84489e-11	3.67661
Rps27	7.47702	7.26476e-12	0.0705897	Skil	25.2686	5.87662e-138	2.16809	Ung	21.6131	1.12349e-100	4.72468	Rsad2	7.44796	7.86673e-11	4.73375
Rpl13	7.35697	1.77627e-11	0.0537466	Dusp1	24.5539	3.09693e-130	1.21945	Cdca7	21.3785	1.66901e-98	2.21578	Ly6a	7.39415	1.12196e-10	2.14083
Rps3a1	7.18364	6.2589e-11	0.0531843	Isca1	24.0274	1.081e-124	1.66287	Dctpp1	21.1188	4.01129e-96	1.86456	Irgm1	7.30443	2.09058e-10	3.16958
Rpl23	7.17261	6.7371e-11	0.0428261	Eif1	23.7817	3.70288e-122	0.355856	Dtymk	20.7337	1.23424e-92	1.83326	Serpina3g	7.11476	8.03452e-10	2.32303
Rpl10	7.1279	9.18167e-11	0.0826498	Fam110a	22.4792	4.54998e-109	1.63919	Nap1l1	20.1953	7.38749e-88	1.43633	Ifit3	7.0523	1.20643e-09	7.08267
Rpl5	7.10837	1.05195e-10	0.0645117	Ppp1r15a	22.0186	1.25504e-104	1.06629	Hint1	20.0677	9.29208e-87	0.873971	Parp9	6.99358	1.76041e-09	3.0699
Rpl7	7.097	1.1357e-10	0.0579198	Ccnl1	21.2792	1.11485e-97	0.9108	Hsp90aa1	19.9066	2.24887e-85	0.854637	Mndal	6.95925	2.15754e-09	2.23613
Gm16141	7.00856	2.10916e-10	1.01284	Klf4	21.2582	1.67729e-97	2.18589	Snrpd1	19.8968	2.63301e-85	1.17505	Herc6	6.90409	3.06394e-09	3.82785
Rpl30	6.98233	2.51509e-10	0.0560357	Egr1	20.7057	1.733e-92	1.06056	Mcm4	19.6686	2.34104e-83	2.72567	Shisa5	6.86491	3.88533e-09	1.53926
Rps9	6.93899	3.3477e-10	0.0465743	Btg2	20.5957	1.62925e-91	1.43202	Slc25a5	19.58	1.28946e-82	1.13228	Apobec3	6.8528	4.07787e-09	1.64931
Gimap1	6.91162	4.01841e-10	0.223252	Cdk11b	20.2331	2.62852e-88	1.1246	Mif	19.5284	3.42318e-82	1.11334	Tap1	6.76817	7.09074e-09	2.02539
Rps5	6.76311	1.0865e-09	0.0503468	Tsc22d2	19.9459	8.27084e-86	1.29931	Ybx1	19.4944	6.43328e-82	0.793378	Trim12a	6.66167	1.42289e-08	2.33453
Rpl27a	6.64868	2.30835e-09	0.0436439	Klf6	19.9402	8.99252e-86	1.09472	Dek	19.4131	3.0432e-81	1.30122	Eif2ak2	6.60441	2.02986e-08	2.57038
Rpl24	6.63739	2.46768e-09	0.0633792	Rlim	19.7546	3.49856e-84	1.14406	Hspa8	19.4107	3.08875e-81	0.588741	Isg20	6.59669	2.07155e-08	3.14247
Ccnd2	6.62979	2.58553e-09	0.202671	D8Ertd738e	19.5785	1.09358e-82	0.748549	Cdk4	19.2748	4.1771e-80	1.16264	Slfn5	6.45866	4.99015e-08	3.88018
Pdzk1ip1	6.62348	2.68521e-09	0.228866	Dnajb1	19.3629	7.15141e-81	1.26044	Gmnn	19.1616	3.59066e-79	3.06025	Cxcl10	6.45586	4.99015e-08	8.34079
Zfp950	6.60954	2.92233e-09	0.399445	Ddx5	19.208	1.38839e-79	0.377161	Hnrnpf	19.1503	4.3321e-79	0.804145	AW112010	6.44276	5.28522e-08	1.7332
Tnip3	6.60488	3.00131e-09	0.467143	Gm26532	19.1677	2.93821e-79	1.90647	Dnmt1	19.1268	6.61384e-79	2.07729	Mx1	6.42615	5.73214e-08	6.90499
Rpl35a	6.57688	3.59008e-09	0.0571787	Dusp2	18.7689	5.62799e-76	1.07422	Prim1	19.0139	5.57702e-78	3.00579	Sp100	6.36058	8.56481e-08	2.33357
Rpl11	6.52586	4.93526e-09	0.0466725	Sik1	18.2002	2.07832e-71	1.21572	Hells	18.9536	1.71015e-77	3.98149	Oasl1	6.31608	1.11318e-07	5.50402
Rps4x	6.47621	6.77178e-09	0.0450632	Srsf5	17.9817	1.06747e-69	0.443496	Nme1	18.7712	5.25579e-76	1.32439	Ube2l6	6.30771	1.14488e-07	2.19253
A630072M18Rik	6.43572	8.80709e-09	0.595853	Coq10b	17.6539	3.65315e-67	0.934275	Set	18.692	2.26883e-75	1.00025	Gbp3	6.30297	1.15093e-07	3.16337
Rplp1	6.3951	1.1344e-08	0.0517461	Cdkn1a	17.5962	9.88645e-67	2.85045	Rpa2	18.4478	2.03748e-73	2.11206	Rnf213	6.27964	1.30504e-07	2.8684
Luc7l3	6.34108	1.57779e-08	0.349414	Rgs1	17.3661	5.4635e-65	1.4008	Rfc2	18.313	2.38903e-72	1.58736	Ms4a6b	6.26303	1.41741e-07	2.78671
Rps14	6.25418	2.69262e-08	0.0423361	Tsc22d1	17.3243	1.10453e-64	0.709774	Cox5a	18.1147	8.54432e-71	1.08975	Dhx58	6.20788	1.96923e-07	3.40082
Rpl19	6.24906	2.77058e-08	0.0495817	Dnajb9	17.2288	5.66113e-64	1.10252	Siva1	18.0777	1.63631e-70	1.36959	Usp18	6.17431	2.38134e-07	4.69723
Rpl37	6.23416	3.03455e-08	0.0548	Jun	17.1267	3.2184e-63	0.749061	Slbp	17.7188	1.00644e-67	1.80695	Trim30a	6.11301	3.42556e-07	2.57571
Pnisr	6.23259	3.0521e-08	0.192103	Id1	17.0747	7.68371e-63	2.43364	Eif5a	17.6385	4.09342e-67	0.674529	Ifit2	6.04973	4.97304e-07	4.35108
Lyl1	6.13778	5.47495e-08	0.260073	Wwc2	16.9401	7.48527e-62	1.09135	Pfn1	17.5725	1.28791e-66	0.618463	Samhd1	5.94522	9.26199e-07	1.99763
Kcnq1ot1	6.10634	6.48119e-08	0.212957	Jund	16.7094	3.60324e-60	0.54396	Dnajc9	17.392	2.99379e-65	1.70715	Bst2	5.89697	1.21618e-06	1.80823
Adgrg1	5.98199	1.37368e-07	0.124472	Snrpc	16.477	1.69276e-58	0.73759	Nop56	17.1179	3.37328e-63	1.38638	Psme1	5.82058	1.88056e-06	1.04161
Arhgap45	5.96297	1.53151e-07	0.366077	Socs3	16.2075	1.37952e-56	2.24407	Uhrf1	17.0919	5.1748e-63	4.62418	Psmb10	5.81778	1.88056e-06	1.51115
Rps13	5.94682	1.68386e-07	0.0461245	Clk1	16.0004	3.84714e-55	0.626719	Sumo2	17.0637	8.21832e-63	0.64127	Cmpk2	5.76648	2.5024e-06	4.47863
Xbp1	5.92414	1.91109e-07	0.416843	Maff	15.7746	1.38407e-53	1.73829	Snrpb	16.9659	4.20769e-62	0.882434	Ifih1	5.71999	3.23018e-06	2.41737
Mtdh	5.90313	2.16293e-07	0.170772	Dennd4a	15.6145	1.69236e-52	1.06171	Tpi1	16.9304	7.56268e-62	0.990581	Gbp4	5.62202	5.61466e-06	4.07052
Rps11	5.89309	2.28105e-07	0.0436789	Stk17b	15.2466	4.97034e-50	1.3149	Cdt1	16.8791	1.77246e-61	3.66977	Gbp5	5.6112	5.86663e-06	3.60284
Hacd4	5.85318	2.86943e-07	0.245054	Tiparp	15.1759	1.43842e-49	1.89446	Lmnb1	16.851	2.80284e-61	2.34748	Treml2	5.55283	8.05764e-06	1.63623
Rps21	5.83437	3.18854e-07	0.0440328	Dusp5	14.8129	3.34455e-47	2.24516	Gapdh	16.6904	4.11101e-60	0.591159	H2-T23	5.51646	9.73906e-06	1.21173
Gm19590	5.82238	3.40049e-07	0.309893	Avl9	14.8052	3.6861e-47	0.807934	Hmgb2	16.5494	4.24895e-59	1.16662	Trim12c	5.48926	1.11647e-05	2.07366
Rpl34	5.765	4.71609e-07	0.0445154	Yrdc	14.8034	3.7193e-47	1.06342	Rbm3	16.4062	4.46619e-58	0.726207	Samd9l	5.43095	1.52383e-05	2.3113
Nrip1	5.74863	5.17723e-07	0.268932	Btg1	14.4181	1.04581e-44	0.783844	Syce2	16.2799	3.48756e-57	1.8786	Ddx58	5.35468	2.29039e-05	2.59705
Apoe	5.72503	5.92942e-07	0.170021	Per1	13.9732	5.86915e-42	1.41211	Rfc5	16.2511	5.48815e-57	1.97306	F830016B08Rik	5.31339	2.82762e-05	3.48968
Ifitm1	5.71867	6.13329e-07	0.157084	Sfr1	13.7007	2.55676e-40	0.487521	Gins2	16.2013	1.21718e-56	3.29121	Dtx3l	5.30322	2.94094e-05	2.47759
Rpl18a	5.63652	9.70172e-07	0.0398553	Snu13	13.4671	6.11526e-39	0.451198	Rrm1	16.0614	1.15378e-55	2.30988	Psmb8	5.27555	3.36592e-05	1.07201
Madd	5.61815	1.06781e-06	0.655061	Cenpa	13.0759	1.11418e-36	1.54226	Pa2g4	16.0345	1.75245e-55	1.12497	Stat2	5.24257	3.96324e-05	3.03804
Rpl26	5.6166	1.07365e-06	0.0446161	Nkx2-3	12.9563	5.2487e-36	0.686137	Hat1	15.852	3.20602e-54	1.71052	Slfn8	5.19952	4.92234e-05	2.79813
Cbx6	5.52679	1.73728e-06	0.330749	Tra2b	12.7549	6.99333e-35	0.506258	Ybx3	15.8485	3.33733e-54	1.07199	Oas3	5.14536	6.47672e-05	3.50408
Rps27a	5.48904	2.13108e-06	0.0348101	Zcchc6	12.7361	8.77086e-35	0.588048	Txn1	15.8177	5.36572e-54	0.726266	Slfn2	5.04576	0.000107119	2.17685
Rps8	5.41474	3.19381e-06	0.038499	Rhob	12.595	5.21468e-34	0.654923	Hspd1	15.763	1.25871e-53	0.991292	Ms4a6c	5.0443	0.000107119	2.5824
Rps28	5.40444	3.36083e-06	0.0601586	Ctla2a	12.5468	9.4632e-34	0.582742	Alyref	15.6368	9.07959e-53	1.22881	Lgals3bp	4.99921	0.000133479	1.71231
Snhg20	5.38086	3.80722e-06	0.387349	Elf1	12.5367	1.05948e-33	0.542421	Tyms	15.6305	9.88076e-53	2.63836	Gbp2	4.98388	0.000142408	2.89268
Rps3	5.32862	5.01708e-06	0.0406725	Hspa5	12.4905	1.8678e-33	0.507627	Nudc	15.6165	1.21329e-52	0.928659	Zufsp	4.96604	0.000153914	2.20164
2610037D02Rik	5.32405	5.12839e-06	0.781513	Ranbp2	12.4122	4.91607e-33	0.761597	Usp1	15.5914	1.77474e-52	1.91768	Gm4841	4.90241	0.000210228	4.32632
Rps23	5.27398	6.59815e-06	0.0402323	Csrnp1	12.0966	2.37843e-31	1.57287	Atp5g1	15.5834	1.98313e-52	0.890464	Serpina3f	4.89446	0.000215871	3.70847
Rpl3	5.23677	7.9524e-06	0.0438829	Ier5	11.9062	2.31084e-30	0.942004	Dhfr	15.5475	3.43003e-52	3.38313	Tor3a	4.81685	0.000310748	2.88559
Rps10	5.23408	8.04406e-06	0.0399387	Fosl2	11.8945	2.62246e-30	1.34369	Hnrnpd	15.3907	3.86982e-51	1.01309	Epsti1	4.81685	0.000310748	1.59917
AC149090.1	5.22948	8.22139e-06	0.22291	Prdx6	11.829	5.66195e-30	0.306779	Hsp90ab1	15.2726	2.32459e-50	0.350579	Ppa1	4.80176	0.000330643	1.41522
Rpl10a	5.14755	1.24584e-05	0.0367273	Neurl3	11.7589	1.28544e-29	0.631242	Atad2	15.2145	5.58139e-50	2.20528	B2m	4.74368	0.000435397	0.417783
Itm2b	5.09113	1.65547e-05	0.0739809	Ftl1	11.7139	2.15955e-29	0.185129	Tmpo	15.213	5.64065e-50	1.38467	9930111J21Rik2	4.73421	0.00045031	3.08374
Rpl6	5.08167	1.72991e-05	0.0362166	2810403A07Rik	11.7096	2.24256e-29	0.72865	Nop58	15.1447	1.57953e-49	1.06295	Capza2	4.63899	0.000707725	1.05565
Tmem59	5.06808	1.85262e-05	0.148555	Rbm39	11.6823	3.05729e-29	0.277302	Cks1b	14.8717	9.23109e-48	1.78921	Etnk1	4.59097	0.000880523	1.49798
Itga4	5.05014	2.0235e-05	0.377445	Ddx50	11.5399	1.59612e-28	0.465508	Prdx1	14.8641	1.02144e-47	0.719159	Trafd1	4.52576	0.00118604	2.15153
Rpl12	5.03333	2.19655e-05	0.0389176	Rnf4	11.498	2.56554e-28	0.70386	Rnaseh2b	14.7783	3.58624e-47	2.02903	Ehd4	4.49085	0.0013809	1.70146
Gng11	5.02854	2.24567e-05	0.157116	Slc38a1	11.4557	4.13091e-28	0.614681	Ncl	14.7782	3.58624e-47	0.656539	Gbp9	4.46488	0.00154044	3.08603
Tsc22d4	5.02239	2.30557e-05	0.220627	Vamp3	11.0641	3.39382e-26	0.793412	Hnrnpa3	14.7305	7.18914e-47	0.809762	Irgm2	4.38382	0.00221532	2.83681
Uqcc3	4.99934	2.57684e-05	0.259217	Arpc3	10.8061	5.77042e-25	0.301241	Hirip3	14.6403	2.69132e-46	1.93088	H2-T22	4.36884	0.00234451	1.13725
Naca	4.98956	2.68778e-05	0.0655496	Tra2a	10.7531	1.01502e-24	0.377389	Rpsa	14.5978	4.96964e-46	0.223333	Batf2	4.32077	0.00288419	3.25253
Rps7	4.97177	2.90575e-05	0.0266139	Pde10a	10.6919	1.94542e-24	2.78791	Pcna	14.5705	7.33491e-46	1.79992	Ifit3b	4.29901	0.00314536	7.34601
AI480526	4.95945	3.07906e-05	0.895857	Klf13	10.6285	3.80673e-24	0.81081	Ssrp1	14.5236	1.43979e-45	1.00482	Gbp6	4.28357	0.00329525	4.03827
Ltb	4.95195	3.14794e-05	0.201298	Zc3h12a	10.5156	1.2544e-23	1.52161	E2f1	14.5226	1.44618e-45	3.70436	Ncoa7	4.26971	0.00346745	1.68307
Rpl38	4.94428	3.24256e-05	0.0471626	Fth1	10.421	3.37158e-23	0.127656	Fen1	14.5031	1.90246e-45	2.29356	Psmb9	4.17128	0.00530639	0.984485
Hist1h2ac	4.92891	3.48601e-05	0.834176	Selenok	10.4106	3.72231e-23	0.310841	Tkt	14.4112	7.07477e-45	0.781312	Phf11b	4.1611	0.00548754	3.05742
Lst1	4.89167	4.19277e-05	0.202984	Pim3	10.194	3.49967e-22	1.07383	Mrpl18	14.4005	8.18724e-45	1.24353	Sp110	4.14864	0.00573182	1.36158
Tmem176b	4.88637	4.29576e-05	0.105822	Sertad1	10.0735	1.17586e-21	0.931478	U2af1	14.3349	2.08792e-44	0.901651	Ifi35	4.14174	0.00584356	2.04082
Tspan32	4.87018	4.63844e-05	0.182842	Ptp4a1	10.0714	1.18981e-21	0.747112	Nrm	14.2677	5.43001e-44	2.42913	Mitd1	4.13051	0.00607119	2.26771
Tbxas1	4.81286	6.04604e-05	0.188045	Ing2	9.98801	2.73926e-21	0.961785	Nop10	14.2604	5.96779e-44	0.773104	Lgals9	4.03781	0.00895428	1.53164
Rps20	4.77474	7.18261e-05	0.0355913	Etv3	9.80434	1.70038e-20	0.858798	Fam111a	14.2468	7.18713e-44	2.16685	Gm12185	4.03249	0.00905371	3.28116
Rpl32	4.7362	8.62661e-05	0.0345772	Sub1	9.77585	2.23173e-20	0.246646	Pold1	14.217	1.08901e-43	2.62641	Ankrd17	4.03033	0.00905371	1.16326
Hlf	4.6953	0.000103382	0.152064	Klhl24	9.71204	4.14139e-20	0.446513	Srsf2	14.2015	1.34679e-43	0.82243	Irf9	4.00342	0.0100446	1.80788
Rgs18	4.69176	0.000104934	0.172121	Hist1h1c	9.56093	1.76927e-19	0.748448	Dtl	14.1921	1.52441e-43	1.8968	Ifit1bl1	3.97067	0.0114144	6.72085
H2-K1	4.6821	0.000109464	0.0623458	Hist1h2bc	9.55592	1.83938e-19	1.12141	Hmgn1	14.0508	1.11251e-42	0.853912	Tapbp	3.94564	0.0125485	1.28769
Fau	4.64275	0.000131255	0.0314895	Neat1	9.53643	2.1989e-19	0.409636	Srsf3	14.0169	1.77828e-42	0.649784	Gbp8	3.94225	0.0126014	2.61514
Rpl22	4.55147	0.000198572	0.0412595	Ncf2	9.37884	9.57189e-19	0.596746	Npm1	14.0001	2.23258e-42	0.371836	Irf1	3.91996	0.0136898	1.99121
Rab38	4.53639	0.000211798	0.164624	Ndel1	9.37872	9.57189e-19	0.816689	Ppa1	13.9989	2.24714e-42	1.04877	Ogfr	3.83972	0.0188552	1.50359
Sirt3	4.51743	0.000229516	0.185648	Purb	9.19177	5.43989e-18	0.396267	Banf1	13.9516	4.3302e-42	1.12156	Cd274	3.81545	0.0206085	2.38096
mt-Co1	4.50909	0.000237262	0.047768	Plk2	9.18839	5.56425e-18	1.27129	Pmf1	13.8955	9.41094e-42	2.10571	Tor1aip1	3.79317	0.0223348	1.6154
H2-D1	4.47537	0.000275218	0.0550657	Spry1	9.1853	5.67609e-18	1.15409	Hnrnpab	13.8777	1.1968e-41	0.948692	Casp4	3.78229	0.023114	1.75219
Tia1	4.45654	0.000298472	0.269158	Vegfa	9.18036	5.89053e-18	2.06507	Rfc4	13.8261	2.43118e-41	2.06804	Tmem140	3.73936	0.0271855	2.0639
mt-Atp6	4.41344	0.000358862	0.0376797	Myct1	9.17592	6.08576e-18	0.35161	C1qbp	13.8228	2.52387e-41	0.870038	Chmp4b	3.73702	0.0271855	1.15002
Myb	4.39697	0.000384894	0.210039	Frat2	9.16078	6.9434e-18	0.664706	Raly	13.8054	3.18714e-41	0.94053	Cd47	3.66976	0.0351181	0.674877
Ptpn18	4.39329	0.000390317	0.0907628	Atf3	9.04917	1.92487e-17	3.14379	Srsf7	13.7953	3.63619e-41	1.01836	Znfx1	3.6383	0.0393384	3.00508
Cst3	4.35579	0.000459452	0.107635	Tssc4	8.95299	4.54577e-17	0.706293	Topbp1	13.7842	4.20077e-41	1.795	Selenow	3.63502	0.0393794	0.583854
Tspan4	4.3331	0.000507241	0.185529	Puf60	8.74597	2.83419e-16	0.417237	Eef1g	13.7484	6.84503e-41	0.492936	Psme2	3.63338	0.0393794	1.08382
Zfp397	4.31667	0.000542937	0.40888	Tgoln1	8.70912	3.89402e-16	0.635595	Tuba4a	13.656	2.40324e-40	1.05717	Mov10	3.61765	0.0414811	2.51599
mt-Cytb	4.31213	0.000551799	0.0393617	Lysmd3	8.68171	4.88313e-16	1.30291	Paics	13.5896	5.87196e-40	1.06655	Trim34a	3.59402	0.0446429	2.22439
Cox7a2l	4.3072	0.000563033	0.0711498	Atf4	8.67379	5.18913e-16	0.425536	Atp5b	13.5589	8.85063e-40	0.593122	Tnfsf10	3.56823	0.0488507	2.24095
Tmem50a	4.29577	0.00059156	0.147343	Icam1	8.67175	5.24176e-16	0.930802	Eif4a1	13.5433	1.07363e-39	0.609237	Ccdc50	3.5501	0.0518945	1.42216
Rpl18	4.26085	0.00068465	0.0308406	Ubb	8.66812	5.36968e-16	0.125603	Prmt1	13.543	1.07363e-39	0.893988	Psma3	3.54314	0.052832	0.741013
Mllt3	4.24683	0.000726723	0.155443	Saraf	8.65212	6.08441e-16	0.306752	G3bp1	13.5165	1.51674e-39	0.834507	Nmi	3.49606	0.0625627	1.50187
Rpl8	4.22761	0.000787094	0.0331927	Chka	8.58729	1.06357e-15	0.708057	Serbp1	13.51	1.64329e-39	0.544744	Psma5	3.45231	0.0721122	0.840966
Vmp1	4.21028	0.000844839	0.230331	Ube2s	8.44351	3.65069e-15	0.333323	Rpl41	13.4466	3.84968e-39	0.271319	Socs1	3.45126	0.0721122	2.37384
Cers4	4.15514	0.00105465	0.190848	Ypel3	8.43975	3.74186e-15	0.339765	Hmgn2	13.436	4.40872e-39	0.951109	G3bp2	3.39751	0.0871702	0.911109
Nsd1	4.14445	0.00109605	0.240843	Map1lc3a	8.43679	3.80947e-15	0.594527	Ptges3	13.4098	6.23094e-39	0.921614	Wnk1	3.38178	0.0915742	1.07431
5031425E22Rik	4.12178	0.00119996	0.333346	S1pr1	8.41405	4.55844e-15	1.4739	Rbmxl1	13.2578	4.75151e-38	1.21293	Tspo	3.33411	0.107938	0.741975
Sema4b	4.10121	0.00130646	0.768036	Tacc1	8.32634	9.45811e-15	0.457834	Snrpd2	13.2393	5.98936e-38	0.714615	Parp11	3.30709	0.117037	2.1292
Letm2	4.09864	0.00131844	0.353008	Siah2	8.30318	1.14158e-14	1.3256	Hnrnpu	13.2384	6.01439e-38	0.730769	Clec2d	3.30305	0.117807	0.959676
Tmem80	4.06825	0.00148479	0.538449	Spty2d1	8.28632	1.29696e-14	0.689077	Impdh2	13.2206	7.57033e-38	0.722686	Zc3hav1	3.29563	0.120028	1.87053
Gimap6	4.06624	0.00149172	0.14072	Csde1	8.16029	3.63437e-14	0.355479	Rps17	13.1709	1.44245e-37	0.350217	Gm4070	3.26562	0.132471	2.69991
Lpar6	4.06177	0.00151454	0.432874	Jmjd1c	8.0466	9.06871e-14	0.452086	Ezh2	13.136	2.27375e-37	1.83083	Fnbp4	3.25802	0.135034	1.42029
Mecom	4.01324	0.00184071	0.154329	Fosb	8.0356	9.78852e-14	0.455496	Rbbp7	13.0245	9.79335e-37	0.888892	Oas1a	3.22954	0.148103	2.66202
Pim1	3.99116	0.0020169	0.198683	Arf6	7.96443	1.73315e-13	0.658777	Dnph1	12.9835	1.661e-36	1.76246	Aip	3.22047	0.150586	1.06685
Dcun1d1	3.98223	0.00209015	0.202612	Tmed5	7.9507	1.91118e-13	0.421621	Fkbp4	12.9702	1.96248e-36	0.875985	Ddx60	3.21152	0.153196	2.31913
Rpl21	3.98108	0.00209627	0.0342376	Aff4	7.8215	5.30976e-13	0.63334	Srm	12.9307	3.26099e-36	1.251	AW011738	3.21129	0.153196	3.0624
Gm42418	3.94438	0.00241656	0.0855504	Pofut2	7.76583	8.09403e-13	0.833987	Cfl1	12.8617	7.87362e-36	0.455721	Lcp1	3.18772	0.165035	0.754893
Psap	3.93125	0.00253791	0.14874	Dyrk3	7.73089	1.05902e-12	1.12948	Cisd1	12.8443	9.79284e-36	1.27155	Tgtp1	3.18415	0.165872	4.34522
Rps15a	3.91769	0.00267988	0.0284262	Luc7l2	7.62162	2.42311e-12	0.23383	Nhp2	12.7593	2.90662e-35	1.02953	Usp25	3.17737	0.16858	1.45104
Ppp1r11	3.91184	0.00274035	0.211522	Mapk6	7.61977	2.44313e-12	1.17509	Tubb4b	12.7362	3.88766e-35	0.837631	Tgtp2	3.14883	0.184006	2.5791
Rack1	3.90584	0.00280397	0.0333383	Srgn	7.59728	2.88349e-12	0.137987	Chaf1a	12.6741	8.53445e-35	3.41676	Frmd4a	3.14772	0.184006	1.74791
Art4	3.89886	0.00287515	0.333033	Cirbp	7.59678	2.88349e-12	0.295493	Fbl	12.5728	3.06907e-34	0.818442	Gdap10	3.12748	0.195769	2.53481
Pfdn5	3.89061	0.00295798	0.0656566	Rgcc	7.49	6.42565e-12	0.955184	Orc6	12.5168	6.18254e-34	1.6979	Tmbim6	3.12239	0.197792	0.721515
Abcg3	3.88636	0.0029992	0.408073	Serinc1	7.45424	8.38339e-12	0.436326	Chaf1b	12.439	1.62201e-33	1.32351	H2-M3	3.1049	0.206973	1.24823
Lrpap1	3.88044	0.00306712	0.225035	Sertad2	7.44736	8.7802e-12	0.66641	Tfdp1	12.4299	1.79539e-33	1.52739	Pnp	3.09555	0.212154	0.78534
Laptm4a	3.87043	0.003184	0.113219	Gem	7.42811	1.00981e-11	1.00268	Ppil1	12.3597	4.25741e-33	1.47356	Helz2	3.08391	0.219131	2.77696
Mast4	3.86599	0.00323046	0.348676	Nfkbid	7.38824	1.34823e-11	1.5525	Ndufa4	12.3478	4.90262e-33	0.558843	Trim30d	3.02963	0.26085	2.15487
Sash3	3.85068	0.00342031	0.295307	Ube2d3	7.29991	2.55072e-11	0.234545	Cbx5	12.2869	1.03676e-32	1.23455	H2-Q4	3.02729	0.261113	0.917248
Tmem176a	3.84525	0.00349044	0.109711	Tsc22d3	7.2694	3.16283e-11	0.306648	Gtf3a	12.2414	1.80685e-32	1.07081	Skap2	2.97875	0.304227	0.812309
Fut8	3.84461	0.00349315	0.169504	Tmsb4x	7.24921	3.65188e-11	0.11984	Hspe1	12.2258	2.17647e-32	0.662141	Tmsb10	2.96822	0.312759	0.640842
Atraid	3.84168	0.00352871	0.213076	Pcgf5	7.22552	4.30093e-11	0.382697	Cycs	12.2193	2.34186e-32	1.27658	Gm12216	2.96056	0.318535	1.2697
Mettl7a1	3.83334	0.00364379	0.178271	Adipor1	7.22024	4.44712e-11	0.466321	Cenpx	12.1893	3.3661e-32	0.928809	Il2rg	2.9529	0.324414	1.34583
Abcg2	3.82091	0.00380467	0.198265	Ttc19	7.17682	6.016e-11	0.513002	Ppp1r14b	12.1545	5.09831e-32	0.89686	Parp10	2.94553	0.330086	2.14489
Slfn2	3.81084	0.00392752	0.39327	Ubl3	7.1627	6.59898e-11	0.535713	Phgdh	12.1331	6.58099e-32	0.844081	Pla2g16	2.93722	0.336869	0.850032
Smpdl3a	3.80697	0.00397514	0.135321	Cdkn2d	7.14566	7.43218e-11	0.490528	Ldha	12.0695	1.41892e-31	0.638127	Snw1	2.92453	0.346446	0.730992
Lmo2	3.79909	0.00409631	0.0618884	Ccl4	7.0741	1.23524e-10	0.666452	Atpif1	11.9913	3.61977e-31	0.602809	Hspa8	2.90488	0.364319	0.325099
Malat1	3.79162	0.004214	0.0615832	Mafk	7.03909	1.57265e-10	1.14632	Fkbp2	11.941	6.51835e-31	1.2618	Sap30	2.88599	0.381948	1.59251
Ap2b1	3.78411	0.00433547	0.383871	Mapk1ip1l	7.02295	1.75651e-10	0.542095	Snrpf	11.9046	1.00291e-30	0.677202	N4bp1	2.82762	0.44542	1.44801
2310001H17Rik	3.76381	0.00466172	0.30496	Tmem131l	6.94019	3.14994e-10	0.633061	Cct3	11.7904	3.87621e-30	0.727721	Ifitm1	2.81803	0.456198	0.418882
Parp14	3.75185	0.00485559	0.41651	Nktr	6.76708	1.05169e-09	0.32992	Sdf2l1	11.7407	6.9437e-30	2.1634	Il18	2.81236	0.461559	1.59083
Esam	3.74056	0.00505208	0.215748	Srsf11	6.74233	1.22875e-09	0.256116	Fignl1	11.739	7.04181e-30	4.08118	Nras	2.79621	0.476745	1.10204
Shisa5	3.74013	0.00505208	0.132724	Rhoh	6.64689	2.25823e-09	0.40497	Smc2	11.6834	1.34996e-29	1.58088	Slfn9	2.76773	0.514459	2.80051
Rpl36	3.69455	0.00587669	0.0303042	Bhlhe40	6.63474	2.42919e-09	1.8556	Mrpl12	11.6813	1.37543e-29	0.995678	Ccdc12	2.76001	0.523748	0.693832
Cyb5a	3.67194	0.00636803	0.120789	Pde4b	6.63399	2.43005e-09	0.583436	Umps	11.6482	2.01802e-29	1.51167	Laptm4a	2.75212	0.533479	0.510295
Zeb2	3.6622	0.006593	0.228998	Kpna1	6.60596	2.92346e-09	1.00539	Rpa1	11.5198	8.93143e-29	1.68553	Rsbn1l	2.73521	0.555317	0.789939
mt-Co3	3.58891	0.00853334	0.0326406	Dazap2	6.59292	3.16262e-09	0.304632	Rif1	11.4821	1.36831e-28	1.19261	Mlkl	2.72814	0.564185	2.11603
Cd47	3.58872	0.00853334	0.083714	Uqcrfs1	6.56892	3.68249e-09	0.291951	Rpl22l1	11.3986	3.54276e-28	0.402784	Fam174a	2.7196	0.575727	0.878181
Fnta	3.58769	0.00855323	0.221491	Trib1	6.55931	3.9098e-09	1.06342	Rmi2	11.3907	3.8596e-28	3.38782	Srsf3	2.71527	0.577473	0.467824
Rpl39	3.57578	0.00890874	0.0273964	Slc3a2	6.50466	5.50584e-09	0.289623	Tmem14c	11.3618	5.34846e-28	1.0316	Trim30c	2.70673	0.585441	3.21991
Ifitm3	3.55193	0.00967832	0.0695063	Map1lc3b	6.44794	7.94502e-09	0.173509	Sumo3	11.3263	7.85972e-28	0.865384	Fndc3a	2.68392	0.620148	1.32413
Cd27	3.54612	0.00987828	0.213579	Brd1	6.42789	8.98703e-09	0.383633	Hdgf	11.3009	1.04446e-27	0.752638	Naa20	2.67924	0.6255	0.956384
Rps15	3.53803	0.0101373	0.0312906	Arhgap31	6.35163	1.44788e-08	0.526418	Psma7	11.2598	1.65814e-27	0.581614	Fam208b	2.67591	0.62569	1.30163
Rps18	3.51587	0.0109351	0.0297701	Zbtb20	6.32644	1.669e-08	0.251788	Snrpd3	11.1477	5.82351e-27	0.804171	Mycbp2	2.67556	0.62569	0.698214
Arhgef2	3.51514	0.0109479	0.210339	Dnajb6	6.31982	1.73479e-08	0.30164	H3f3a	11.1145	8.40401e-27	0.27108	Smchd1	2.67199	0.628456	0.831828
Guf1	3.51444	0.0109596	0.37428	Vgll4	6.28552	2.14662e-08	0.343384	Sae1	11.082	1.20281e-26	1.03779	Ythdc1	2.66784	0.630194	0.785673
Rps12	3.50245	0.0114108	0.0278481	Nfat5	6.26842	2.38613e-08	0.326466	Nolc1	11.0476	1.7578e-26	1.16709	Oas2	2.65521	0.650883	4.58843
Hnrnpr	3.48959	0.0118952	0.153268	Clk4	6.26715	2.39578e-08	0.501676	Ipo5	11.0433	1.83394e-26	1.33421	Phc2	2.64836	0.657361	1.18
Gimap8	3.47756	0.0123502	0.431117	Zfp36l1	6.25855	2.52125e-08	0.728942	Nxt1	10.9923	3.21806e-26	1.28949	Taf7	2.60596	0.737886	0.747657
Arl6ip1	3.47031	0.0126492	0.0925454	Kdm6b	6.16374	4.48065e-08	0.654994	Pold2	10.9543	4.86892e-26	1.34955	Nsmce2	2.59432	0.754729	1.09531
Rpl28	3.46158	0.0130062	0.0290515	Nop53	6.1631	4.48092e-08	0.207865	Naa50	10.9539	4.86892e-26	1.12403	Arl4a	2.58122	0.780045	1.14428
Slc48a1	3.45847	0.0131372	0.146315	Ddit3	6.1054	6.39063e-08	0.618231	Lsm2	10.9479	5.18086e-26	0.930784	Parp12	2.57484	0.790597	2.04799
Tspan14	3.44515	0.0137599	0.215821	Dhrs11	6.08582	7.19416e-08	0.924821	Mlec	10.9472	5.19541e-26	1.06993	Dcp2	2.55256	0.830555	1.66251
Vps28	3.43049	0.0144368	0.148361	Nfkbiz	6.08304	7.29146e-08	0.57011	Snrpa1	10.9117	7.64884e-26	1.09166	Mepce	2.54361	0.847958	1.1953
Gimap9	3.42691	0.0145656	0.355557	Utp14b	6.04396	9.18981e-08	0.948209	Dpy30	10.8771	1.11265e-25	0.997287	Tmem14c	2.5318	0.871303	0.85334
Krit1	3.40942	0.0154821	0.159673	Gadd45b	6.03711	9.55119e-08	1.07912	Nt5dc2	10.8552	1.40181e-25	2.20389	Zcchc6	2.53034	0.871303	0.751686
Por	3.4005	0.0159716	0.162475	Atp13a3	6.02524	1.02397e-07	0.700266	Psip1	10.8527	1.43252e-25	0.890829	Il18bp	2.52899	0.871303	2.32398
Ptprc	3.39424	0.0162975	0.15461	Tpm3	6.02029	1.05174e-07	0.193455	Smc6	10.8117	2.21213e-25	1.08754	Marc2	2.51425	0.904212	0.650037
Atp6v0b	3.38663	0.0166262	0.110085	Hectd1	5.99836	1.19493e-07	0.290146	Uqcr10	10.8037	2.40126e-25	0.778791	Pml	2.5025	0.916032	1.128
Taz	3.38378	0.0167501	0.241289	Rnf138	5.97052	1.41245e-07	0.47341	Hmgb3	10.7972	2.56669e-25	0.915978	Ctss	2.50127	0.916032	2.09139
Tmem140	3.37337	0.0173445	0.558466	Nap1l3	5.93311	1.7619e-07	0.60837	Ak2	10.7281	5.38194e-25	0.86116	Ufm1	2.4984	0.919157	1.13549
Mrps16	3.357	0.0183235	0.12901	Malat1	5.89767	2.16902e-07	0.121816	Pgls	10.7184	5.92343e-25	0.775872	Clptm1l	2.48378	0.946859	1.04025
Gtf2i	3.34557	0.0190114	0.180207	Jmjd6	5.87801	2.42479e-07	0.511864	Pkm	10.7136	6.20192e-25	0.487698	Adar	2.48127	0.946859	1.59192
Fam32a	3.31177	0.0211538	0.132623	Cd24a	5.76818	4.56114e-07	0.254387	Rad50	10.7104	6.37517e-25	1.03946	Rida	2.47548	0.954385	0.987091
Adcy7	3.30846	0.0213128	0.319059	Nceh1	5.67879	7.53116e-07	0.289285	Exosc8	10.6903	7.8826e-25	1.13214	Klf6	2.47519	0.954385	0.771344
Hbp1	3.298	0.0219707	0.295042	Ddx3x	5.65937	8.40499e-07	0.336321	Rfc1	10.6877	8.04703e-25	1.04648	Ifi204	2.46437	0.971249	7.70928
Samhd1	3.2856	0.0228569	0.174898	Rrad	5.62226	1.02122e-06	1.08717	Apex1	10.6781	8.87559e-25	0.972195	BC147527	2.46407	0.971249	3.22232
5033406O09Rik	3.2841	0.0229458	0.263845	Arl4c	5.57634	1.32181e-06	1.4118	Cenps	10.6487	1.2119e-24	3.51744	Dnajc7	2.45255	0.989604	0.730061
Pnp	3.28199	0.0230538	0.110266	Ifrd1	5.53192	1.68718e-06	0.388416	Dkc1	10.6425	1.28995e-24	0.922944	Vapa	2.43594	0.999953	0.653192
Treml2	3.28124	0.0230815	0.180112	Mtf1	5.52857	1.71394e-06	0.856539	Pgk1	10.64	1.31914e-24	0.742814	Fgfr1op2	2.42541	0.999953	0.754374
Ptprcap	3.27283	0.0237452	0.0406488	Adgre5	5.51784	1.81582e-06	0.640669	Mdh2	10.6361	1.36937e-24	0.708445	Idnk	2.4229	0.999953	0.993827
Pdrg1	3.27048	0.0239102	0.133585	Arid5a	5.50404	1.9574e-06	1.12772	Bex3	10.6357	1.36959e-24	0.657853	H2-D1	2.41962	0.999953	0.285184
Fis1	3.26378	0.0243792	0.105139	Ccrl2	5.47129	2.33254e-06	0.869788	Fabp5	10.6312	1.43163e-24	1.07681	Smc4	2.41231	0.999953	0.910975
Eng	3.26176	0.0244846	0.139716	Cdkn2aip	5.46576	2.39848e-06	0.630842	Atp5e	10.6251	1.52206e-24	0.491097	Trim56	2.40641	0.999953	1.44687
Eef2	3.22566	0.0274849	0.0396855	Fbxo33	5.39844	3.44116e-06	1.03269	Srpk1	10.6049	1.881e-24	0.947414	Ogfrl1	2.40506	0.999953	0.722284
Eef1g	3.22515	0.0274955	0.0605151	Rcc2	5.39713	3.45532e-06	0.271863	Top2a	10.5323	4.04434e-24	2.27649	F11r	2.39921	0.999953	0.97547
Kdm5b	3.21411	0.0283291	0.222501	Wsb1	5.35716	4.27222e-06	0.435234	Ywhaq	10.5168	4.73077e-24	0.681239	Acadl	2.39178	0.999953	0.836672
Tmem126b	3.20637	0.0289541	0.558878	Ddit4	5.32892	4.92951e-06	0.884919	Hprt	10.4965	5.84281e-24	0.802719	9530082P21Rik	2.39085	0.999953	2.26477
Rpl36a	3.20522	0.0290301	0.0275236	Jag2	5.30185	5.61319e-06	1.37103	Cbx3	10.4403	1.04827e-23	0.821986	Nr2c2	2.38155	0.999953	1.07111
Kcnn4	3.19496	0.0300005	0.19238	Ccpg1	5.29756	5.72887e-06	0.764925	Atp1b3	10.4275	1.195e-23	1.25819	Ppie	2.36552	0.999953	0.723349
Pcmtd2	3.18698	0.0307567	0.334777	Srrm2	5.22649	8.25441e-06	0.134886	Galk1	10.4202	1.28063e-23	1.13267	Selplg	2.36412	0.999953	0.895505
Sesn1	3.17602	0.0317982	0.291487	Calm2	5.17734	1.0593e-05	0.124083	H2afy	10.4015	1.55152e-23	0.511499	Dnajc1	2.34464	0.999953	0.872206
Angel2	3.17577	0.0317982	0.258825	Slc38a2	5.175	1.06947e-05	0.25275	Erh	10.3943	1.66626e-23	1.01825	Csf1	2.33412	0.999953	2.84106
Selenom	3.17229	0.0320948	0.193323	Zfp593	5.1458	1.24263e-05	0.433388	Pola1	10.3692	2.14121e-23	2.13445	Plxna4os1	2.32996	0.999953	1.28442
Camk2d	3.15753	0.0335833	0.189732	Fbxo30	5.14368	1.25306e-05	1.08947	Higd1a	10.3608	2.3289e-23	1.09913	Myd88	2.32628	0.999953	1.40694
Tprgl	3.14898	0.0344284	0.125325	Taf7	5.12578	1.35811e-05	0.266584	Cox5b	10.3534	2.50664e-23	0.573807	Usp47	2.32031	0.999953	1.17459
Slc25a11	3.14872	0.0344284	0.1233	Sqstm1	5.11322	1.43912e-05	0.406131	Hpf1	10.3249	3.36058e-23	1.07698	Hspa5	2.32002	0.999953	0.531671
Itsn1	3.14331	0.0350252	0.193085	Adrb2	5.10084	1.52768e-05	0.930338	Slfn9	10.3105	3.89014e-23	2.85893	Dhx9	2.31675	0.999953	0.921416
Rps16	3.12426	0.0370784	0.0256092	mt-Nd2	5.0922	1.58984e-05	0.0886224	Cenpm	10.2692	5.95174e-23	3.30967	Chmp5	2.31657	0.999953	0.904541
Nudt16	3.10528	0.0392832	0.319663	Zfyve27	5.07874	1.69702e-05	0.583718	Eif3a	10.2602	6.51084e-23	0.668249	Ddost	2.31651	0.999953	0.711015
Selenop	3.10077	0.039782	0.117368	Cdip1	5.07185	1.72239e-05	0.489189	Phb2	10.2317	8.70511e-23	0.706318	Nlrc5	2.31271	0.999953	1.80626
Phip	3.09277	0.0406581	0.157419	Paf1	5.0718	1.72239e-05	0.539186	Prdx4	10.2312	8.71297e-23	0.91892	Tsc22d1	2.30376	0.999953	0.539391
Tcf4	3.08385	0.0415714	0.156891	Fam103a1	5.02813	2.1395e-05	0.333489	Abracl	10.2256	9.15991e-23	0.748787	Kcnk5	2.29166	0.999953	1.15951
Rcsd1	3.0811	0.0419042	0.23929	Dctn4	5.01293	2.30941e-05	0.376465	Timeless	10.1899	1.31912e-22	3.94368	H2-Q6	2.28973	0.999953	0.610592
mt-Co2	3.07985	0.0419716	0.0207577	Arhgap17	4.91944	3.61069e-05	0.31348	Psmc3ip	10.1857	1.37177e-22	2.39998	Sh3glb1	2.2875	0.999953	0.633157
Tpm1	3.07721	0.042291	0.262735	Tob1	4.89781	3.98419e-05	0.680608	Casp8ap2	10.1769	1.49612e-22	1.35407	Rnase6	2.28113	0.999953	1.46826
Chd4	3.05552	0.0451257	0.121494	Nup98	4.87711	4.3746e-05	0.493406	Pold3	10.1688	1.62012e-22	1.5291	Plekha2	2.27481	0.999953	1.38698
Hp1bp3	3.04936	0.0458284	0.137982	Eprs	4.84805	5.05361e-05	0.203019	Actb	10.156	1.84e-22	0.304148	Utp3	2.27265	0.999953	0.903363
Stk38	3.0368	0.0474803	0.364972	Chd2	4.82048	5.76034e-05	0.27216	Ywhah	10.1438	2.07544e-22	0.747641	Atp8a1	2.26604	0.999953	1.24193
Ccm2	3.01676	0.050608	0.247333	Zrsr2	4.81973	5.76732e-05	0.353702	Rps2	10.1435	2.07544e-22	0.201816	Ankfy1	2.2568	0.999953	1.47926
Gcnt2	3.01514	0.050815	0.117969	Foxn3	4.8119	5.93761e-05	0.214726	Nudt5	10.1039	3.10042e-22	1.29852	Tpd52	2.24452	0.999953	0.842988
Ly6a	3.00846	0.0517506	0.110128	Tmed2	4.80691	6.05707e-05	0.169945	Samd1	10.0956	3.35983e-22	1.56665	Sh3bgrl3	2.23276	0.999953	0.439859
Sult1a1	2.98249	0.055792	0.194854	Ube2b	4.80473	6.0928e-05	0.201042	Krtcap2	10.0876	3.63394e-22	0.578723	Cyba	2.21188	0.999953	0.548433
Gm12216	2.98085	0.0560233	0.262739	Gls	4.79226	6.45211e-05	0.308482	Cks2	10.0863	3.66963e-22	1.35572	Fyb	2.21135	0.999953	1.25416
Selenow	2.97123	0.0576648	0.0607513	Nr1h2	4.76529	7.25621e-05	0.32023	Ndufab1	10.0729	4.17391e-22	0.727232	Cd74	2.19931	0.999953	1.11689
Plcb2	2.96275	0.0591323	0.208435	Ptbp3	4.76335	7.30435e-05	0.243891	Crip1	10.0476	5.3781e-22	0.925247	Csde1	2.19375	0.999953	0.602737
Nfe2	2.95734	0.0599581	0.135019	Morf4l1	4.7041	9.54955e-05	0.116746	Lsm3	9.98581	1.00105e-21	0.680315	Asb13	2.19001	0.999953	1.44076
Msn	2.94857	0.0614236	0.120673	Tnfaip2	4.70301	9.57809e-05	0.800986	Anapc5	9.93736	1.61801e-21	0.788665	Ifitm2	2.18621	0.999953	0.249581
Was	2.94838	0.0614236	0.219611	Zfp644	4.66569	0.000113309	0.207924	Cct8	9.93644	1.6272e-21	0.609986	Daxx	2.17217	0.999953	1.63657
Mmrn1	2.93423	0.0635966	0.14367	Mef2c	4.65937	0.000116302	0.167856	Exosc5	9.92867	1.75279e-21	0.877331	Obscn	2.17153	0.999953	0.956234
Rb1cc1	2.93271	0.0637551	0.149881	Abt1	4.65504	0.000118496	0.500977	Rps27l	9.92599	1.79426e-21	0.588181	Zkscan3	2.16544	0.999953	0.888828
Amn1	2.93148	0.0639306	0.369952	1700017B05Rik	4.59173	0.000157883	0.640144	Jpt2	9.91451	2.00589e-21	1.61648	Enpp4	2.1562	0.999953	1.46574
Apobec3	2.91399	0.0671389	0.0987953	Dpy19l3	4.59052	0.000158441	0.552615	Cacybp	9.90675	2.16009e-21	0.811285	Pim1	2.15	0.999953	0.842114
Dguok	2.90264	0.0692911	0.110655	Gm26699	4.58307	0.000163446	0.416797	Cox7c	9.79089	6.79205e-21	0.481102	Trim25	2.14287	0.999953	1.47488
Eif3f	2.89637	0.0703765	0.0381513	Sat1	4.54611	0.000193188	0.27609	Atp5h	9.78673	7.05261e-21	0.449281	Ifi213	2.14006	0.999953	6.22874
Arl10	2.88949	0.0717458	0.70486	mt-Co1	4.53722	0.000201059	0.0504407	Timm50	9.78202	7.36324e-21	1.12414	Plscr2	2.13287	0.999953	3.21248
Il16	2.88019	0.0736347	0.226955	Eif4a2	4.53107	0.000206082	0.12149	Ddx39	9.77501	7.86429e-21	1.24939	Lrrc45	2.13117	0.999953	1.82546
Dnajc1	2.87659	0.0741319	0.184114	Gstm1	4.52259	0.000214042	0.164755	Hmgb1	9.77319	7.9786e-21	0.387299	1600014C10Rik	2.12924	0.999953	1.82064
Thap2	2.87143	0.0749144	0.339096	Srpr	4.50845	0.000227653	0.295271	Nsmce4a	9.77183	8.05915e-21	0.749168	Unc50	2.1286	0.999953	0.74732
Zfp760	2.87033	0.0749697	0.870045	Pag1	4.50811	0.000227653	0.513979	Lsm6	9.75019	9.94241e-21	0.904087	Arfgef1	2.12637	0.999953	0.819677
Ttc5	2.8701	0.0749697	0.236678	Tmem41b	4.50484	0.00023017	0.508687	Tagln2	9.74693	1.02312e-20	0.422329	Nasp	2.12088	0.999953	1.24115
Ormdl3	2.85612	0.0779004	0.159058	Procr	4.50437	0.000230174	0.21476	Pdia3	9.74481	1.04113e-20	0.690889	Gm5431	2.11877	0.999953	5.35648
Tmem208	2.84806	0.0795537	0.19089	Irf2bpl	4.4869	0.000247699	0.995445	Nup62	9.73508	1.14188e-20	1.25539	Leo1	2.11608	0.999953	1.14473
Gstm1	2.84104	0.081214	0.105412	Bclaf1	4.45492	0.000282146	0.172111	Psmd7	9.71846	1.33999e-20	0.68084	Svbp	2.11333	0.999953	0.914277
Dcaf8	2.83389	0.0825806	0.124273	Nrarp	4.44702	0.000288408	1.37241	Slc29a1	9.67939	1.95183e-20	1.44056	Usf1	2.11117	0.999953	1.13196
Hsd17b11	2.83228	0.0828849	0.363515	Vamp2	4.44371	0.000292277	0.396488	Bzw2	9.65824	2.39187e-20	0.890567	Copz1	2.10509	0.999953	0.739189
Crot	2.83157	0.0828968	0.32648	P2rx4	4.43514	0.000300985	0.371511	Calr	9.6371	2.92941e-20	0.524177	Zfp945	2.10351	0.999953	1.10212
Trmt13	2.82199	0.0850298	0.590043	Actg1	4.40169	0.000345851	0.0879486	Cops3	9.59185	4.53194e-20	0.930013	Apbb1ip	2.09877	0.999953	0.678683
4931406C07Rik	2.82156	0.0850469	0.314793	Arl5b	4.4002	0.000346588	1.28939	Atp5j2	9.58611	4.77535e-20	0.562926	Tnrc18	2.09824	0.999953	1.25666
Gabarap	2.81469	0.086497	0.0732582	Herpud1	4.38933	0.000362159	0.312296	Mms22l	9.56663	5.74708e-20	2.0084	Il27	2.09427	0.999953	3.04281
Dalrd3	2.80579	0.0887212	0.277922	Glul	4.38284	0.000370882	0.200251	Hnrnpa2b1	9.5596	6.13093e-20	0.44359	Atp6v1d	2.09011	0.999953	0.725968
Imp3	2.80076	0.0899326	0.0900814	Id3	4.37901	0.000376704	2.82445	Stub1	9.55489	6.39543e-20	0.788701	Grn	2.08777	0.999953	0.910013
Tmem40	2.79925	0.0902364	0.153714	Plaur	4.37148	0.000388369	1.34063	Ssr4	9.54874	6.74278e-20	0.543985	Dbnl	2.08543	0.999953	0.903144
Slamf1	2.78641	0.0935769	0.420676	Tmem30a	4.35539	0.00041471	0.305428	Minos1	9.51619	9.13663e-20	0.739655	Aida	2.07479	0.999953	1.46596
Trim47	2.78423	0.0938968	0.127369	Tecpr1	4.3146	0.000492386	0.48936	Chek1	9.50253	1.03853e-19	3.78305	Lst1	2.06596	0.999953	0.542765
Lyz2	2.78322	0.0940812	0.0746426	Senp2	4.29277	0.000540243	0.334015	Haus4	9.50005	1.06022e-19	1.16345	Upf2	2.06292	0.999953	1.13846
H2-T23	2.78231	0.0942401	0.0641351	Runx1	4.26753	0.000599303	0.232539	Supt16	9.49954	1.06198e-19	0.855054	Nt5c3	2.05748	0.999953	0.518441
Pbx1	2.78174	0.0943036	0.0971869	Fau	4.26386	0.000608061	0.0421371	Rexo2	9.49645	1.09043e-19	0.862269	Psmg1	2.05356	0.999953	0.918944
Eif3e	2.75784	0.100237	0.0626803	Tmem251	4.21564	0.000735414	0.479718	Timm13	9.49394	1.11003e-19	0.73044	Fam46a	2.05315	0.999953	4.74349
Ift20	2.74734	0.10278	0.102951	Rusc1	4.21343	0.000741272	0.642735	Park7	9.48281	1.23074e-19	0.44285	Ccdc86	2.05093	0.999953	0.99282
Bet1l	2.74585	0.103099	0.415073	Mkln1	4.19537	0.000798397	0.211946	Nucks1	9.48252	1.23074e-19	0.742755	Ociad1	2.03689	0.999953	0.611917
S1pr4	2.74282	0.103943	0.236222	Arrdc3	4.17053	0.000877571	0.702115	Parp1	9.474	1.33122e-19	0.982125	Jagn1	2.0366	0.999953	0.794094
Paqr7	2.73466	0.106097	0.276192	Tnrc6b	4.16824	0.00088402	0.239596	Ssb	9.4106	2.43058e-19	0.542249	Csnk1g2	2.02929	0.999953	0.625181
Bcl11a	2.73296	0.106531	0.0770924	Pfdn5	4.13652	0.00100534	0.0975368	Uqcrq	9.39458	2.80428e-19	0.792437	Ddx52	2.01858	0.999953	1.14461
Marf1	2.72624	0.108256	0.349071	Zbtb10	4.12281	0.00105946	1.0608	Psma4	9.39161	2.87539e-19	0.596109	Xiap	2.0173	0.999953	1.00245
Atxn7l1	2.72473	0.108521	0.286128	Odc1	4.1165	0.00108306	0.286754	Pdia6	9.38745	2.98202e-19	0.681524	Hdlbp	2.01513	0.999953	0.837115
G430095P16Rik	2.71446	0.111586	0.247939	Hbegf	4.1056	0.00112934	1.10599	Calm1	9.36351	3.70771e-19	0.52234	Rrbp1	2.01508	0.999953	0.674407
Mrps17	2.7064	0.114087	0.152281	Arf4	4.07877	0.00125019	0.14621	Cdk2ap1	9.34593	4.36501e-19	1.17415	Snx6	2.00092	0.999953	0.622083
Zfp106	2.70329	0.115039	0.195696	Cnot7	4.07756	0.00125452	0.307216	Phf5a	9.34048	4.5817e-19	0.8565	AC149090.1	2.00081	0.999953	0.49298
Iigp1	2.69248	0.118459	0.208192	Atp11b	4.05909	0.00134852	0.241846	Rfc3	9.29215	7.18087e-19	1.09738	Ube2d2a	1.98811	0.999953	0.523623
Synj2bp	2.69007	0.119189	0.231899	Rel	4.04421	0.00142963	0.791294	Atp5g3	9.28056	7.98252e-19	0.688955	Atp6v1g1	1.97367	0.999953	0.390239
Rplp0	2.6849	0.120413	0.0235315	Mllt3	4.04014	0.00144968	0.144939	Brca2	9.22229	1.36875e-18	2.30081	Pcgf5	1.9715	0.999953	0.612656
Lcp1	2.68429	0.120507	0.0868588	Fam43a	4.03779	0.00146176	0.43702	mt-Nd1	9.21234	1.49729e-18	0.271643	Asph	1.9684	0.999953	0.996766
Lamtor3	2.67898	0.121795	0.16859	Syf2	4.03027	0.00150418	0.162498	Timm8a1	9.18651	1.89854e-18	1.04709	Cpne3	1.96373	0.999953	0.888645
Mettl27	2.67296	0.123611	0.27498	Elk4	4.01089	0.00163035	0.338091	Mrpl42	9.16937	2.21956e-18	0.76468	Plgrkt	1.95747	0.999953	0.585688
Agtrap	2.6685	0.125005	0.243925	Ywhaz	4.0037	0.00167216	0.143755	Pole3	9.12441	3.33515e-18	1.13099	Borcs8	1.95554	0.999953	1.16048
Rps19	2.66487	0.1261	0.0122078	Aplp2	3.98149	0.00183331	0.201963	Pebp1	9.12276	3.3762e-18	0.364187	Rpp25l	1.94758	0.999953	0.847408
Trmt1l	2.66249	0.126864	0.320958	Topors	3.98066	0.00183455	0.344064	Cox6c	9.10853	3.83844e-18	0.495095	Hmox2	1.93331	0.999953	0.659596
Ankrd49	2.6597	0.127656	0.377386	BC005624	3.97789	0.00185181	0.227757	Nsd2	9.09788	4.22184e-18	1.06195	Nr3c1	1.93127	0.999953	0.777018
Rpl7l1	2.6582	0.128091	0.115716	Ldlr	3.97425	0.00187403	0.589085	Manf	9.09131	4.47195e-18	0.780157	Dnaja1	1.93103	0.999953	0.391261
Ash1l	2.65012	0.130926	0.141356	Tax1bp1	3.94644	0.00208441	0.155575	Cenpk	9.0835	4.79115e-18	3.10836	Cd86	1.92916	0.999953	2.26646
Gm3448	2.64757	0.131779	0.736497	Marcksl1	3.94469	0.00209621	0.349322	Lsm7	9.07351	5.23663e-18	0.706164	Trim21	1.92881	0.999953	2.27826
Procr	2.64114	0.133892	0.115141	Alkbh5	3.92929	0.00221302	0.343067	Shmt1	9.04325	6.89033e-18	1.90145	Eya1	1.92629	0.999953	0.973817
Ap5m1	2.63877	0.134557	0.52441	Prkx	3.90018	0.00248048	0.853491	Fkbp11	9.02568	8.06824e-18	1.39006	Ift27	1.92425	0.999953	0.924733
Coq8a	2.63684	0.135186	0.186167	Rbbp6	3.89608	0.00250989	0.169568	Pgp	9.01796	8.63279e-18	1.16351	Sfrp1	1.9239	0.999953	1.78229
Cdc42ep3	2.63594	0.135406	0.199428	Bptf	3.87073	0.00275507	0.180551	Ssbp4	9.01522	8.8103e-18	0.887674	Irf2	1.92314	0.999953	0.435252
Usp40	2.63393	0.135793	0.487164	Sun2	3.85555	0.00292232	0.395918	Msh6	9.0151	8.8103e-18	1.50063	2610002M06Rik	1.9198	0.999953	1.0225
Add1	2.63148	0.136499	0.207343	Srp9	3.84697	0.00300144	0.125747	Pabpc4	9.01264	8.98439e-18	1.12154	Rras	1.91857	0.999953	0.808621
Map3k14	2.62824	0.137461	0.677931	Dnttip2	3.84485	0.00301407	0.218175	Psmd13	8.98939	1.10417e-17	0.938881	Pnpt1	1.91758	0.999953	1.54934
Ikzf2	2.62805	0.137461	0.187605	Hey1	3.8438	0.00302229	3.18564	Psmb5	8.98681	1.1272e-17	0.663716	Prkcq	1.91501	0.999953	1.04097
Ing4	2.62651	0.137808	0.177231	Dhx9	3.81311	0.00339667	0.249742	Eif2s1	8.98171	1.17736e-17	0.807027	Cnp	1.91039	0.999953	0.950931
Plpbp	2.62227	0.139249	0.17976	Plgrkt	3.81168	0.00340565	0.138161	Snrpe	8.97977	1.19173e-17	0.479516	Map2k1	1.90898	0.999953	1.00156
E230032D23Rik	2.62147	0.139295	0.565592	Slc7a1	3.80718	0.0034521	0.649699	Pola2	8.97657	1.2234e-17	1.97794	Ttc1	1.90775	0.999953	0.825343
Ndufa13	2.61995	0.139636	0.0769296	Bri3	3.79738	0.00358586	0.128244	Uqcc2	8.94805	1.58024e-17	0.799253	Nsmce4a	1.90313	0.999953	0.587261
Ninj1	2.61013	0.142988	0.0947356	Pik3r1	3.75954	0.00409503	0.154801	Cdk1	8.9419	1.66619e-17	2.12011	Tm9sf1	1.89962	0.999953	2.2709
Vwf	2.60496	0.144731	0.344887	Arcn1	3.75932	0.00409503	0.30812	Oxct1	8.91309	2.14985e-17	0.966333	Gm13822	1.89945	0.999953	3.16723
Hist1h1d	2.60354	0.145184	1.16395	Rnf125	3.75617	0.00414062	0.396101	Ubtf	8.90828	2.23891e-17	0.78047	Nampt	1.89559	0.999953	1.21822
1700020I14Rik	2.60032	0.146262	0.202342	Meg3	3.74798	0.00425862	0.356879	Aes	8.89771	2.45609e-17	0.392343	Naxe	1.89448	0.999953	0.599273
Rabgap1	2.59991	0.146294	0.243835	Tpt1	3.74007	0.00437507	0.0250512	Mrpl14	8.88291	2.79832e-17	0.761864	Arhgap8	1.89231	0.999953	3.0999
3830406C13Rik	2.59743	0.147063	0.248057	Zbtb11	3.7376	0.00440696	0.528299	Nmral1	8.87198	3.07875e-17	1.66696	Gm9493	1.89138	0.999953	0.740378
Cyth4	2.59203	0.1488	0.188583	Zyx	3.73666	0.00440908	0.195681	Csrp1	8.86872	3.16146e-17	0.873452	Ndufs4	1.88775	0.999953	0.503077
Asah1	2.59002	0.149484	0.208624	Rsrc2	3.73209	0.00446881	0.14698	Polr2f	8.85408	3.59557e-17	0.662301	Cct3	1.88699	0.999953	0.431946
Fam213a	2.58977	0.149484	0.176155	S100a10	3.73135	0.00447529	0.145702	Ddx39b	8.8507	3.69607e-17	0.636221	Sept11	1.88693	0.999953	1.0953
Ankrd12	2.58287	0.151758	0.160967	Prtn3	3.72876	0.00450581	0.126756	Atp5o-1	8.82584	4.58019e-17	0.625272	Malat1	1.8843	0.999953	0.222816
Cd300a	2.57463	0.154886	0.361496	St8sia4	3.71869	0.00467766	0.342485	Stip1	8.82536	4.58744e-17	0.903861	Map3k8	1.88418	0.999953	1.70489
6030458C11Rik	2.57331	0.15495	0.561361	Trmt10c	3.69153	0.00514582	0.318884	Ppm1g	8.82091	4.76085e-17	0.81397	Ppm1a	1.87828	0.999953	0.722367
4930481A15Rik	2.57156	0.155338	0.409388	Ythdc1	3.69089	0.00515127	0.203694	H1fx	8.80599	5.42447e-17	0.907202	Tmem60	1.86436	0.999953	0.702051
4833403J16Rik	2.56883	0.1559	0.511483	Mapre1	3.68954	0.00517104	0.183904	Atp5g2	8.80303	5.55491e-17	0.32622	Epn1	1.85336	0.999953	1.01047
Trim12a	2.5684	0.155945	0.177004	Mkrn1	3.68079	0.00532474	0.20906	Cdca7l	8.72276	1.12353e-16	0.90463	Fam241a	1.85266	0.999953	1.46307
Cln3	2.56084	0.158735	0.351484	Hnrnpa0	3.67885	0.00534613	0.112438	Dctd	8.71091	1.24417e-16	0.98673	Hsbp1	1.8488	0.999953	0.43717
Itga6	2.56032	0.158735	0.186578	Sde2	3.67557	0.00539945	0.290214	Atad5	8.71013	1.24953e-16	2.3551	A230050P20Rik	1.84839	0.999953	1.04823
Pts	2.54513	0.164394	0.0835854	Wbp2	3.6684	0.0055134	0.194896	Uchl5	8.69851	1.38071e-16	0.942827	Ctnna1	1.84681	0.999953	1.08036
Ly6e	2.54503	0.164394	0.0625187	Zfp64	3.65954	0.00569109	0.625172	Baz1b	8.69435	1.42852e-16	0.845872	Hibadh	1.83938	0.999953	0.612479
Stat5a	2.536	0.167892	0.19061	Wdr45b	3.63979	0.00607659	0.320474	Rad51	8.69354	1.43507e-16	3.91772	Ppp1r2	1.82804	0.999953	0.735357
Bnip3l	2.53515	0.168142	0.0874	Hoxa5	3.62526	0.00641047	0.484223	Uba2	8.65837	1.94468e-16	0.852947	Nmd3	1.82652	0.999953	0.876292
Sesn3	2.5302	0.170046	0.305333	Fbxw2	3.6196	0.00653402	0.235393	Ppat	8.63481	2.38431e-16	1.1064	Atxn10	1.82546	0.999953	0.546592
Xiap	2.52954	0.170204	0.286918	Zfp622	3.60785	0.00677979	0.307929	Cct7	8.63053	2.46265e-16	0.55974	Vdac3	1.82318	0.999953	0.452489
Trmt1	2.52206	0.173379	0.205494	Krt18	3.59635	0.00704855	0.156035	Hnrnpa1	8.62299	2.62361e-16	0.381118	Ap1s3	1.82219	0.999953	2.01583
Rrnad1	2.51631	0.17557	0.443868	Ltb	3.59571	0.00704855	0.158684	P4hb	8.61757	2.74375e-16	0.899532	Tor1a	1.81511	0.999953	0.842052
Chd6	2.51439	0.176363	0.195522	Zfp868	3.59295	0.0071007	0.76533	Eif3b	8.6105	2.91113e-16	0.789322	Marf1	1.81231	0.999953	0.973319
Ric8a	2.5127	0.177044	0.172249	Bambi	3.57372	0.0075294	0.969424	Wdr76	8.59705	3.26486e-16	2.33523	Ppfia1	1.81143	0.999953	1.43172
Spn	2.50016	0.182071	0.151851	Lin7c	3.57085	0.00757112	0.345086	Mbd3	8.5929	3.3763e-16	0.758241	Actr1a	1.81026	0.999953	1.14988
Fgfr1op2	2.49579	0.183305	0.12886	Eif5	3.56229	0.00780145	0.114029	Mrpl33	8.59122	3.41767e-16	0.654242	Casp8	1.79909	0.999953	0.770099
Ubr2	2.4925	0.184841	0.249862	Top1	3.55804	0.00791795	0.138718	Selenoh	8.57883	3.79693e-16	0.739085	Mef2c	1.79751	0.999953	0.439418
Pdcd7	2.49188	0.184994	0.237176	Cggbp1	3.55077	0.00810727	0.218128	Sec61b	8.54127	5.23297e-16	0.509533	Rab21	1.79628	0.999953	0.670779
Nck1	2.48012	0.189463	0.303332	Snhg6	3.5493	0.00814185	0.272741	Gart	8.53094	5.70786e-16	0.98868	Nelfe	1.79049	0.999953	0.861977
Slc50a1	2.47235	0.192624	0.0637744	Ssh2	3.53083	0.00863978	0.469674	Marcksl1	8.50965	6.84272e-16	0.890951	Gnai3	1.78926	0.999953	0.693877
Atp13a2	2.47149	0.192861	0.212831	Sbno2	3.52167	0.00888781	0.300013	Nup85	8.50279	7.24166e-16	1.51848	D030056L22Rik	1.78879	0.999953	0.885189
Mfng	2.46437	0.195796	0.102262	Pcf11	3.52159	0.00888781	0.252124	Nt5c3b	8.50196	7.27552e-16	0.976049	Pafah1b2	1.77698	0.999953	0.647926
Ppt1	2.45899	0.197912	0.223102	Emb	3.51395	0.00908746	0.260035	Hspa14	8.4946	7.73201e-16	0.95471	Fbxw17	1.77528	0.999953	1.9568
Rpp25l	2.45305	0.200213	0.231562	Akap8l	3.48581	0.00999478	0.254124	Gar1	8.46771	9.67127e-16	0.724455	Zfp292	1.77335	0.999953	0.612911
4833420G17Rik	2.4524	0.200306	0.168128	Il15	3.48029	0.0101825	0.426118	Sfxn1	8.46635	9.7614e-16	0.813239	Ifi27	1.76838	0.999953	0.803131
Bcdin3d	2.45059	0.200803	0.496485	Hoxa10	3.46446	0.010726	0.325397	Cuta	8.45522	1.06867e-15	0.794342	Aldh1l1	1.76832	0.999953	1.51882
Erg28	2.45023	0.200803	0.15909	Sgk1	3.46257	0.0107591	1.9332	Gatm	8.45436	1.07395e-15	1.63422	Sumo1	1.7668	0.999953	0.384691
Supt4a	2.44871	0.201289	0.0921579	Gm26518	3.45205	0.011132	1.11964	Lyar	8.44679	1.1431e-15	0.859388	Clic1	1.76376	0.999953	0.327659
Chd9	2.44714	0.201761	0.158871	6720427I07Rik	3.44345	0.0114447	1.25767	Tmem238	8.43012	1.31511e-15	0.984651	Ywhah	1.75967	0.999953	0.462023
Hist2h4	2.44503	0.202399	2.36821	Smim7	3.43723	0.0116546	0.203543	Cenpv	8.42559	1.36369e-15	1.10531	Ldhb	1.75633	0.999953	0.47833
Esd	2.44481	0.202399	0.0589787	Rps27	3.43048	0.0118758	0.0389611	Smc3	8.41124	1.53398e-15	0.700351	Cyp51	1.75464	0.999953	0.992631
Clec1a	2.43432	0.207257	0.215591	Rab5a	3.43046	0.0118758	0.422594	Atp5f1	8.3966	1.73365e-15	0.454395	Stk26	1.75095	0.999953	0.60913
Nisch	2.432	0.208229	0.0942045	Pcsk7	3.42823	0.0119436	0.468288	Mrpl13	8.38943	1.83391e-15	0.777517	Lrrfip1	1.75095	0.999953	0.610077
Telo2	2.42889	0.209467	0.286961	Fus	3.41795	0.0123428	0.0995866	Idh2	8.38576	1.88753e-15	0.69716	Scaf11	1.75095	0.999953	0.551063
Med28	2.41889	0.214004	0.12705	mt-Nd3	3.41441	0.0124884	0.105631	Cdc45	8.38072	1.96539e-15	3.40489	Zc3h7a	1.75095	0.999953	0.743212
Mpl	2.41769	0.214337	0.0718851	Hlf	3.40824	0.0127427	0.108468	Pcbp1	8.35623	2.40807e-15	0.509209	Clec1a	1.74885	0.999953	0.710498
Creg1	2.39946	0.224144	0.0616855	Cmas	3.40789	0.0127434	0.138011	Rbbp4	8.34634	2.61215e-15	0.675357	Mrpl38	1.74826	0.999953	0.858062
Exosc4	2.39619	0.225954	0.224533	H13	3.39697	0.0131655	0.145809	Msh2	8.34273	2.68679e-15	0.869066	Rnasel	1.74019	0.999953	0.801167
Plxdc2	2.38781	0.229977	0.188705	Zfp608	3.36166	0.0146822	0.189304	Actl6a	8.3239	3.13557e-15	0.812929	Nktr	1.7385	0.999953	0.489844
Cox4i1	2.38515	0.231411	0.02976	Midn	3.34932	0.015224	0.442071	Vdac3	8.31292	3.43171e-15	0.606604	Setx	1.73709	0.999953	1.05093
Trappc5	2.38189	0.232582	0.137327	Jak1	3.34507	0.0154405	0.126609	Ctps	8.31005	3.50757e-15	1.8259	Vps54	1.73475	0.999953	1.49764
Rps29	2.38178	0.232582	0.0120764	Nfkbia	3.3307	0.016164	0.208118	Txnl1	8.30973	3.50895e-15	0.528237	Exosc8	1.73078	0.999953	0.662104
Rabac1	2.37846	0.234084	0.0617812	Usp19	3.32522	0.0164658	0.286484	Hspa9	8.30577	3.61124e-15	0.628113	Lacc1	1.72984	0.999953	2.58956
Oxr1	2.37721	0.234675	0.213068	Ctsh	3.31815	0.0168085	0.333451	Ubap2	8.28855	4.16477e-15	1.16864	Etv6	1.72773	0.999953	0.53431
Cbfa2t3	2.37545	0.235597	0.0765246	Crlf2	3.3116	0.0170863	0.144801	Smarcc1	8.27005	4.84223e-15	0.786079	H2-K1	1.72633	0.999953	0.232302
Retreg1	2.36689	0.239893	0.108055	Otud1	3.30663	0.0173522	0.598999	Rpa3	8.26909	4.87049e-15	1.11333	Aldoa	1.72551	0.999953	0.306393
Gnpat	2.35262	0.246992	0.402415	Zbtb21	3.29429	0.0180901	0.885431	Odc1	8.26302	5.11277e-15	0.785943	Ssr3	1.72545	0.999953	0.65375
Yae1d1	2.35175	0.247339	0.266096	Tcp11l2	3.29374	0.0181046	0.241812	Mrto4	8.25091	5.64566e-15	0.8907	Nectin4	1.72516	0.999953	2.35069
Trim12c	2.35015	0.247954	0.201356	Smpdl3a	3.29178	0.018189	0.115086	Rnf168	8.23056	6.6775e-15	1.40786	Zeb1	1.72423	0.999953	0.724406
Cwf19l2	2.34969	0.247954	0.206331	Lncpint	3.28756	0.0183998	0.398535	Ppp1ca	8.21843	7.35497e-15	0.50559	Stat3	1.72066	0.999953	0.69437
Gm4951	2.34826	0.248446	0.208074	Lsp1	3.27226	0.0193052	0.161205	Impa2	8.20942	7.8927e-15	0.916585	Fundc1	1.71972	0.999953	0.978484
Cdc40	2.33824	0.25351	0.15725	Ascc3	3.26394	0.0197533	0.330621	Mat2a	8.20142	8.41702e-15	0.540369	Wdr77	1.7189	0.999953	0.775251
Eif4b	2.3323	0.256929	0.0597939	Zmynd8	3.25722	0.0201123	0.213864	Fam162a	8.20112	8.41963e-15	0.770871	Osbpl9	1.71358	0.999953	0.656315
Uqcrh	2.33181	0.257052	0.0320705	Csnk1e	3.24835	0.0205867	0.201788	Usp37	8.16547	1.12935e-14	1.31477	Bms1	1.70925	0.999953	1.09326
Tnfaip8	2.32983	0.258202	0.0883672	Rsbn1	3.24552	0.0207462	0.339302	Rnaseh2a	8.15593	1.21953e-14	1.04127	Rc3h2	1.70025	0.999953	0.992732
Map4k2	2.3225	0.262211	0.296367	Txndc11	3.23239	0.0216503	0.664547	Rpl14	8.15479	1.2283e-14	0.127973	Hk1	1.69644	0.999953	0.655315
Tcp11l2	2.31869	0.263912	0.187727	Setd7	3.2279	0.0219684	0.371472	Atp5k	8.14946	1.28077e-14	0.687059	Calcrl	1.69334	0.999953	0.948996
Zfp263	2.31266	0.2674	0.288627	Rabac1	3.19503	0.0241721	0.0857559	Haus1	8.1388	1.39571e-14	1.38443	Derl1	1.69001	0.999953	0.702913
2210016L21Rik	2.30207	0.273435	0.183134	Arih2	3.19346	0.0242774	0.607149	Gars	8.13468	1.44073e-14	0.948509	Cyc1	1.68065	0.999953	0.536645
Tmcc1	2.29854	0.275623	0.270939	Ptgs2	3.1849	0.0248976	2.19223	Spc24	8.12644	1.53871e-14	3.90458	Isca2	1.67861	0.999953	0.743364
Gaa	2.29507	0.276965	0.178338	Mark3	3.16979	0.0259746	0.31072	Fkbp3	8.12532	1.54957e-14	0.521392	Tap2	1.6782	0.999953	0.595503
Slc18a2	2.29214	0.277985	0.199694	Senp6	3.15816	0.0268591	0.128302	Slf1	8.124	1.56308e-14	1.25137	Pxk	1.67796	0.999953	1.23124
Mak16	2.29084	0.278363	0.232706	Hjurp	3.1528	0.0272992	0.228801	Tcp1	8.11912	1.62368e-14	0.552547	Cope	1.67785	0.999953	0.553517
F11r	2.29075	0.278363	0.17717	H1f0	3.14553	0.0278084	0.244472	Ndufs6	8.11804	1.63453e-14	0.760425	Dcaf8	1.67516	0.999953	0.494237
Eef1a1	2.28391	0.282255	0.0172936	Hscb	3.12991	0.0290827	0.162245	Prim2	8.10229	1.85666e-14	2.33582	Hexb	1.67375	0.999953	0.773512
Msmo1	2.27856	0.285356	0.278557	Pdcd6	3.11744	0.0300559	0.131364	Cnbp	8.09493	1.96827e-14	0.322925	Pin4	1.66849	0.999953	0.774666
Arl6ip5	2.26591	0.293298	0.112268	Ncoa2	3.10645	0.0310341	0.279327	Wdhd1	8.08919	2.0588e-14	2.47553	Chordc1	1.66732	0.999953	0.844397
Ddx42	2.26346	0.294708	0.169183	Cltc	3.09562	0.032057	0.266657	Hmgn5	8.08586	2.11127e-14	0.963007	Fam76b	1.66691	0.999953	1.07564
Snw1	2.25909	0.297147	0.0614467	Tob2	3.09441	0.0321402	0.361349	Vdac1	8.08492	2.12295e-14	0.59849	Tfam	1.66153	0.999953	0.706006
Brf2	2.25716	0.298409	0.574091	H2-Q4	3.05803	0.0359762	0.155092	Taf10	8.08308	2.15062e-14	0.638501	Fam26f	1.66024	0.999953	1.08501
Ube3a	2.25561	0.299377	0.114631	Cwc25	3.04286	0.0375147	0.516721	Psmb3	8.077	2.25566e-14	0.597716	1110059E24Rik	1.6579	0.999953	0.899088
Tspo	2.25423	0.300215	0.0495158	Tpp2	3.04281	0.0375147	0.289863	Agpat5	8.06719	2.43914e-14	0.966378	Washc1	1.65393	0.999953	0.769325
Mrpl23	2.24792	0.304214	0.0729479	Pabpc1	3.02745	0.0391078	0.0605675	Cad	8.06188	2.54204e-14	1.65349	Tmem219	1.65182	0.999953	0.895675
Eef1d	2.2469	0.304783	0.0401366	Mgst1	3.02633	0.0391867	0.350689	Ptpn7	8.03425	3.17207e-14	0.845231	Gem	1.65176	0.999953	1.27716
Nsmaf	2.24551	0.305649	0.283684	Kansl1	3.02556	0.0392469	0.279444	Rnaseh2c	8.02994	3.2786e-14	0.70078	Seh1l	1.64983	0.999953	1.05473
Tomm5	2.24157	0.307579	0.0887811	Igbp1	3.01969	0.0397764	0.146073	Gmps	8.02571	3.37893e-14	0.844499	Tank	1.64971	0.999953	1.1865
Numa1	2.24112	0.307602	0.098328	Chmp1b	3.01017	0.0409224	0.397469	Nans	8.01997	3.53315e-14	1.17232	Mtch2	1.64837	0.999953	0.585976
Gm20342	2.24093	0.307602	0.442745	Ahnak	3.00761	0.0411675	0.545113	Noc2l	8.00562	3.96226e-14	0.836149	Herc4	1.64644	0.999953	1.10129
Arl1	2.23676	0.310213	0.0895314	Fam133b	3.00579	0.0413522	0.214182	Rangap1	8.00323	4.03158e-14	1.20491	Gzf1	1.64293	0.999953	1.33511
Ifi47	2.23146	0.313146	0.129763	Zfp36l2	3.0009	0.0418559	0.0766973	Ddost	8.00157	4.07764e-14	0.622974	F2rl3	1.64293	0.999953	1.20299
Khk	2.23129	0.313146	0.113483	Cript	2.99178	0.0429578	0.170485	Pgam1	7.99494	4.29417e-14	0.617199	Zfp652	1.63743	0.999953	1.06429
H2-Q6	2.2312	0.313146	0.0788669	Mob4	2.98051	0.0443954	0.197568	Aprt	7.99345	4.33726e-14	0.510518	Ggh	1.63691	0.999953	0.711133
Zfp637	2.22583	0.316281	0.228529	Clk3	2.97069	0.0454837	0.322165	Nedd8	7.96416	5.48705e-14	0.511024	Ddx46	1.63585	0.999953	0.608455
Swt1	2.22458	0.316446	0.156681	Sf1	2.9691	0.0456753	0.184799	Pfdn6	7.96381	5.49125e-14	0.752248	Dld	1.63521	0.999953	0.67807
Hook3	2.21972	0.319915	0.241945	Ring1	2.95828	0.0471728	0.363562	Eif1ax	7.95919	5.68834e-14	0.665775	Setdb1	1.63445	0.999953	1.39847
Psenen	2.21457	0.323172	0.068976	Rab14	2.95042	0.0481568	0.111823	Ddx1	7.95747	5.75592e-14	0.858353	Serpinb9	1.63427	0.999953	1.0078
Nsa2	2.21097	0.32566	0.0559073	Sdcbp	2.94594	0.048766	0.0784777	Arpp19	7.95643	5.79262e-14	0.671342	Zfp90	1.63322	0.999953	1.73584
Tmem60	2.20587	0.328698	0.173314	Shisa5	2.93955	0.0496884	0.0966354	Cox7a2	7.95282	5.95151e-14	0.503451	Mpv17	1.63076	0.999953	0.786937
Tmem115	2.20089	0.331393	0.325546	Srebf2	2.93349	0.0504273	0.170086	Hnrnpk	7.94175	6.49403e-14	0.343363	Rpn2	1.62807	0.999953	0.401339
Spi1	2.19201	0.337358	0.137455	Pfdn2	2.9086	0.0535478	0.120699	Mthfd1	7.94083	6.52895e-14	1.29854	Cops7a	1.62673	0.999953	0.605632
Ndfip1	2.18911	0.338914	0.504056	Ctsl	2.88468	0.0572543	0.148323	Elof1	7.93877	6.62446e-14	0.807787	Acat1	1.62351	0.999953	0.467682
Zbtb12	2.18649	0.340668	0.249464	Prkd2	2.88412	0.0573031	0.301287	Psmc4	7.93234	6.96249e-14	0.773345	Atrx	1.62351	0.999953	0.412358
Kcnk5	2.18284	0.342806	0.273527	Hivep2	2.87419	0.0588091	0.704663	Nefh	7.93205	6.96457e-14	1.16095	Jkamp	1.6224	0.999953	0.921511
Pstk	2.17868	0.345407	0.253137	Ccng2	2.8605	0.0609052	0.548185	Ccnd1	7.92672	7.25488e-14	0.961338	Mmadhc	1.62228	0.999953	0.928334
Micu2	2.17454	0.348009	0.237038	Ctla2b	2.85552	0.0616429	0.656309	Cenph	7.91777	7.78052e-14	3.55627	Papola	1.61971	0.999953	0.51327
Rhof	2.17016	0.351355	0.139359	Slc25a36	2.85384	0.0618594	0.209952	Sf3a3	7.90695	8.46117e-14	0.7768	Med12l	1.61837	0.999953	1.18017
Uba7	2.16903	0.352096	0.0785798	Crebrf	2.85377	0.0618594	0.21937	Tmem107	7.90683	8.46117e-14	2.30633	Pttg1	1.61807	0.999953	0.769262
Arpc5	2.16315	0.35604	0.0630588	Bcl10	2.84931	0.0624041	0.217015	Hsp90b1	7.90652	8.46485e-14	0.59108	Commd1	1.61807	0.999953	0.546205
Ech1	2.1562	0.36065	0.0569513	Gimap6	2.84486	0.0631123	0.108783	Mars	7.89044	9.61123e-14	1.45539	Armcx2	1.6179	0.999953	1.16947
Sbno1	2.156	0.36065	0.125035	Ddx3y	2.83366	0.0650158	0.549033	Tsen15	7.87655	1.07202e-13	0.862805	Apip	1.61673	0.999953	0.920548
Sdf4	2.15598	0.36065	0.0801025	Dusp6	2.83318	0.065055	0.505035	Prps1	7.87593	1.07513e-13	0.989811	Hnrnpdl	1.61503	0.999953	0.543792
Arhgef1	2.15475	0.361232	0.179565	Fam214a	2.82969	0.0656933	0.531325	Etfb	7.86244	1.19514e-13	0.612159	Fgd4	1.61287	0.999953	1.12145
AC160336.1	2.14436	0.368504	0.230459	Mir142hg	2.82789	0.0659026	0.688032	Rps8	7.85165	1.30001e-13	0.115097	Ago1	1.61065	0.999953	0.818915
Thap3	2.1413	0.370349	0.163072	Dph5	2.8154	0.0676903	0.178473	Mcmbp	7.84798	1.33592e-13	1.12539	Il21r	1.60918	0.999953	0.592761
2310011J03Rik	2.13977	0.37041	0.133977	Bex3	2.81533	0.0676903	0.100593	Bzw1	7.84256	1.39207e-13	0.610275	Tle4	1.60755	0.999953	1.11592
Rpl23a	2.13749	0.372039	0.0166281	Pink1	2.81012	0.0686754	0.192926	Psmc5	7.82072	1.65296e-13	0.75228	Itm2c	1.60737	0.999953	0.662811
Sdf2	2.12969	0.377376	0.105215	Epc2	2.80973	0.0686979	0.332655	Psme1	7.79616	2.0045e-13	0.397624	Plekhj1	1.60649	0.999953	0.505344
Keap1	2.1247	0.381262	0.146185	Gabarapl1	2.80907	0.0687783	0.104367	Mybbp1a	7.79373	2.03931e-13	0.741804	Faim	1.60562	0.999953	0.876296
Tie1	2.12323	0.38183	0.171196	Hoxb4	2.80785	0.0689788	0.302173	Rpn1	7.77998	2.26921e-13	0.876223	Snap23	1.60252	0.999953	0.59518
Rpgrip1	2.1113	0.390763	0.208607	Ilf2	2.80125	0.0699137	0.143649	Maz	7.77722	2.31471e-13	0.653904	Psmb4	1.60216	0.999953	0.26868
Tardbp	2.10076	0.398217	0.149306	Ndufa6	2.78195	0.0734435	0.0886809	Dscc1	7.77696	2.31491e-13	3.95491	Atp1b3	1.60199	0.999953	0.908188
Sugp2	2.10016	0.398308	0.15713	Spag6l	2.78107	0.0735152	1.4717	Igfbp4	7.77206	2.40145e-13	0.729609	Stx7	1.60135	0.999953	0.783589
Clpp	2.09974	0.398375	0.135684	Chic2	2.77815	0.074117	0.158124	Zmynd19	7.74908	2.87284e-13	1.49466	Pla2g4a	1.59953	0.999953	0.673258
Ubxn6	2.09929	0.39853	0.122403	Ndufb11	2.7763	0.0744125	0.0819807	Nsun2	7.74761	2.90066e-13	0.715338	Cers6	1.59643	0.999953	1.94226
Pygm	2.09401	0.402603	0.309014	Picalm	2.77436	0.0747279	0.401156	Psat1	7.7386	3.10766e-13	1.29269	Kcnab1	1.59608	0.999953	2.88968
Eef1b2	2.08491	0.408889	0.022321	Rbm7	2.76045	0.0775554	0.165315	Exo1	7.71359	3.76701e-13	3.27981	Akr1b3	1.59579	0.999953	0.387464
BC017643	2.084	0.409154	0.297808	Gabarapl2	2.75859	0.0778975	0.121996	Cdc37	7.71265	3.78736e-13	0.490254	Stx16	1.59497	0.999953	0.69465
Cpne3	2.07894	0.413616	0.176935	Nfe2l2	2.75559	0.0784151	0.176545	Rsl1d1	7.69838	4.2271e-13	0.570844	Socs2	1.59392	0.999953	0.664476
Dync1h1	2.07849	0.413616	0.201144	Leng8	2.75438	0.078639	0.227473	2010107E04Rik	7.69625	4.2899e-13	0.55605	Ugp2	1.5914	0.999953	0.872061
Eid1	2.07709	0.414101	0.0829468	Gm4707	2.74626	0.0801367	1.30422	Ydjc	7.69347	4.37564e-13	1.08438	Cyb5b	1.59088	0.999953	0.990321
Mgat1	2.07334	0.416454	0.224907	Twistnb	2.73184	0.0831681	0.130471	Rpl28	7.6909	4.45558e-13	0.125069	Nol11	1.58895	0.999953	0.685304
Rbm38	2.07281	0.416708	0.085248	Bloc1s4	2.72879	0.083592	0.325113	Bola1	7.68985	4.48395e-13	0.862086	Rabepk	1.58807	0.999953	0.898684
Mtf2	2.07184	0.417404	0.187699	Ppp2r3d	2.72289	0.0848975	0.397383	Nrgn	7.65449	5.89588e-13	0.503137	Acap2	1.58637	0.999953	1.19424
Def8	2.06953	0.418515	0.135146	Tmem203	2.72268	0.0848975	0.458875	Gspt1	7.62679	7.29752e-13	0.683403	Slamf8	1.57947	0.999953	2.88445
Mien1	2.06933	0.418515	0.102317	Tspyl1	2.72257	0.0848975	0.217619	Ruvbl2	7.62452	7.41293e-13	0.809248	Phf11d	1.57819	0.999953	3.4193
Gpbp1l1	2.06676	0.420851	0.236355	Ankrd9	2.72001	0.085488	1.21477	Rad18	7.59494	9.30135e-13	2.24972	Zfp212	1.57643	0.999953	1.01362
Gm9856	2.065	0.422075	0.561795	Mdm2	2.70628	0.0885166	0.261195	Ift27	7.58478	1.00026e-12	1.02648	Papss1	1.57468	0.999953	0.844207
2900097C17Rik	2.05814	0.427171	0.136152	Lmbrd1	2.70456	0.0887978	0.333852	Uchl3	7.58433	1.0018e-12	0.860165	Gadd45g	1.57403	0.999953	1.56224
Irf9	2.05799	0.427171	0.189099	Tes	2.70388	0.0887978	0.316155	Idh3a	7.57497	1.07472e-12	0.860268	Spi1	1.56883	0.999953	0.576407
Mbnl2	2.05513	0.428476	0.129276	Cox7a2l	2.69164	0.0912906	0.0660202	Ddx27	7.57386	1.08186e-12	0.788587	Mat2b	1.56327	0.999953	0.48895
Rcn3	2.0465	0.435727	0.182053	Hist3h2a	2.68759	0.0922566	0.331609	1810037I17Rik	7.55302	1.26519e-12	0.605865	Cpq	1.56263	0.999953	0.541926
Trib3	2.04431	0.437153	0.377398	Rasd1	2.68239	0.0932467	1.40314	Rps6	7.52939	1.50514e-12	0.128675	Psmd2	1.56245	0.999953	0.589045
Zfp512	2.04391	0.437279	0.192772	Dusp4	2.66658	0.0969663	0.833468	Rpn2	7.52339	1.57296e-12	0.612843	Otud4	1.56175	0.999953	0.940273
Yme1l1	2.04164	0.438728	0.163337	Plekho2	2.65849	0.098769	0.319983	2610524H06Rik	7.49711	1.91906e-12	0.916031	Afdn	1.55836	0.999953	1.08103
Uba52	2.04137	0.438728	0.0662443	Ddx24	2.65389	0.0997012	0.111348	Rbl1	7.48009	2.18071e-12	1.82513	Tpm3	1.55614	0.999953	0.249707
Rplp2	2.03805	0.441405	0.0139689	Rlf	2.65006	0.100307	0.260485	Romo1	7.46669	2.40563e-12	0.630036	Mcur1	1.55549	0.999953	0.924708
Batf	2.02909	0.449354	0.226546	Furin	2.64643	0.10115	0.317322	Psmb2	7.46331	2.46355e-12	0.484729	Tgm2	1.55193	0.999953	0.519494
9130008F23Rik	2.02689	0.450354	0.533293	Txlng	2.64087	0.102503	0.262499	Serf2	7.46233	2.47741e-12	0.306328	Cct7	1.55105	0.999953	0.307434
Slc35c2	2.02332	0.453621	0.193481	B2m	2.63975	0.102762	0.0386254	Pdap1	7.4553	2.60834e-12	0.718619	Inf2	1.55064	0.999953	0.902618
Mpv17	2.02192	0.454531	0.210038	Krr1	2.62838	0.105513	0.251845	Ebna1bp2	7.45489	2.61173e-12	0.66674	Rpl27	1.54953	0.999953	0.27223
D430042O09Rik	2.01968	0.456061	0.36079	Usp16	2.62481	0.106297	0.322524	Mogs	7.44919	2.72196e-12	0.93921	Atp11b	1.54883	0.999953	0.628424
Paip2	2.01628	0.45886	0.0217781	Serpinb6a	2.61974	0.107471	0.182791	Actg1	7.44396	2.82687e-12	0.317595	Uso1	1.54859	0.999953	1.18096
Hoxb5	2.01494	0.459612	0.404243	Wdr26	2.61434	0.10885	0.2061	Ucp2	7.43961	2.91605e-12	0.579556	Armc8	1.54619	0.999953	1.25313
Cdkn1c	2.01476	0.459612	0.126091	Mettl7a1	2.60945	0.109654	0.127554	Smc1a	7.43513	3.01114e-12	0.529631	Fam84b	1.54222	0.999953	2.20249
Casp12	2.01433	0.459693	0.270786	Map4k4	2.60821	0.109967	0.21741	Prelid3b	7.4188	3.40048e-12	1.12614	Tgfbi	1.54198	0.999953	1.92798
Ahcyl1	2.01159	0.461574	0.171899	Crtc3	2.6039	0.110515	0.240529	Nono	7.41843	3.40373e-12	0.491991	Ptbp3	1.54046	0.999953	0.478514
Tmem234	2.01113	0.461768	0.0388769	Lmo2	2.60303	0.110708	0.0509546	Dnaja1	7.41803	3.4078e-12	0.49354	Tmem243	1.5373	0.999953	1.00601
Ifnar1	2.01004	0.462057	0.321841	Ulk1	2.60191	0.110945	0.373383	Prdx2	7.38942	4.21993e-12	0.366133	Ythdc2	1.53631	0.999953	1.24028
Ecscr	2.00929	0.462584	0.217683	Spag9	2.59822	0.111847	0.245952	Cuedc2	7.3861	4.31861e-12	0.561148	Fnip1	1.53403	0.999953	0.919725
Ap3b1	2.00853	0.463112	0.138839	Irs2	2.58615	0.114825	0.94506	Got2	7.3795	4.52998e-12	0.761326	Utrn	1.53403	0.999953	0.640134
Itch	2.00444	0.466719	0.198036	Atg2a	2.58475	0.115006	0.399908	H2afv	7.37516	4.6633e-12	0.51852	Prrg2	1.53034	0.999953	1.24101
Gpr108	2.00005	0.469019	0.254708	Afg3l1	2.57543	0.11745	0.316183	Psmd1	7.37401	4.69531e-12	0.754521	Tecpr1	1.52912	0.999953	0.888867
Sgms1	1.99982	0.469019	0.0954614	Rnf10	2.57476	0.117561	0.195496	Srsf10	7.34579	5.7899e-12	0.689428	Dusp28	1.52882	0.999953	1.63977
Hist1h3d	1.99756	0.470784	1.23798	Rchy1	2.57246	0.117827	0.157315	Psme2	7.3391	6.07597e-12	0.61148	Ski	1.52479	0.999953	0.775369
Serpina3g	1.99638	0.471483	0.0832604	Capg	2.57227	0.117827	0.10487	Ivns1abp	7.3191	7.03664e-12	0.747363	H2-Aa	1.5245	0.999953	0.744863
Ifitm2	1.9962	0.471483	0.0362297	Phlda1	2.57054	0.11824	1.32977	Psmg2	7.31895	7.03664e-12	0.886011	Sri	1.5221	0.999953	0.455263
Ifit1	1.99241	0.473998	0.223413	Ahr	2.56883	0.118652	0.531705	Magoh	7.31264	7.36201e-12	0.61551	Dnajc2	1.52116	0.999953	0.465959
Nomo1	1.98994	0.47615	0.239984	Hmgb2	2.56802	0.11884	0.0946775	Dhrs4	7.30741	7.64083e-12	0.930492	Eefsec	1.51642	0.999953	1.10522
Rnasel	1.98703	0.477656	0.185137	Fam107b	2.56224	0.120482	0.114272	Ptbp1	7.30427	7.80699e-12	0.61669	Cops3	1.51601	0.999953	0.542525
Rnf130	1.98696	0.477656	0.0694224	Gramd1a	2.5567	0.122058	0.241101	Tcerg1	7.30188	7.93314e-12	0.837632	Tax1bp1	1.51368	0.999953	0.263854
Hsd17b12	1.98641	0.47797	0.125819	Eef2	2.55004	0.123782	0.0318811	Gm10076	7.30093	7.97532e-12	0.355229	Gbp10	1.51134	0.999953	5.43056
Anxa7	1.98446	0.479245	0.106669	Sirt1	2.54924	0.123974	0.497883	Ciapin1	7.29272	8.46206e-12	1.14899	AI314180	1.50824	0.999953	0.586969
Hadh	1.98309	0.480187	0.0997458	Nrbp1	2.5459	0.124986	0.229535	Myg1	7.28017	9.27077e-12	0.936202	Chmp1a	1.508	0.999953	0.711676
Unc13d	1.9825	0.480345	0.134644	Mnt	2.54437	0.125218	0.320549	Exosc2	7.27987	9.27554e-12	1.08532	Ece1	1.50514	0.999953	1.20228
Cdc42se2	1.97775	0.484703	0.16626	Cep350	2.53919	0.126398	0.29544	Gclm	7.2778	9.40254e-12	0.688899	Tia1	1.50461	0.999953	0.524848
Heg1	1.9742	0.487868	0.291693	Smu1	2.53887	0.126421	0.149026	Dna2	7.27568	9.53452e-12	2.42031	Whamm	1.50327	0.999953	0.9651
Tnfrsf1b	1.97359	0.488218	0.474213	Ptger4	2.53169	0.128484	0.392219	Gins1	7.25723	1.08893e-11	3.1551	Eif2a	1.49905	0.999953	0.407949
Arf1	1.97123	0.490301	0.0611893	Magoh	2.52863	0.129425	0.115738	Fubp1	7.25701	1.08893e-11	0.526837	Ap1g1	1.49543	0.999953	1.18065
Gas2l3	1.96929	0.491909	0.373028	Pnpla8	2.51735	0.13269	0.190158	Psmd14	7.24894	1.15383e-11	0.738592	Morc3	1.49414	0.999953	0.602024
Mrpl52	1.96843	0.492534	0.048387	Smarca5	2.5162	0.132867	0.125384	Eif6	7.24525	1.18357e-11	0.620965	Papd7	1.49356	0.999953	1.80257
Fcho2	1.96726	0.49332	0.121491	Klf10	2.51602	0.132867	0.239488	Hdac2	7.24194	1.21077e-11	0.724398	Mif	1.49233	0.999953	0.313074
Khnyn	1.96131	0.496876	0.367401	Map3k8	2.51536	0.132971	0.739298	Shmt2	7.24128	1.21456e-11	1.08063	Uba7	1.49128	0.999953	0.469749
Mttp	1.96121	0.496876	0.640132	Klhl12	2.48678	0.141697	0.456608	Rpl31	7.23629	1.25788e-11	0.254236	Swi5	1.49098	0.999953	0.297502
Gpn1	1.96064	0.49691	0.261678	Csnk1a1	2.48662	0.141697	0.0741654	Wdr12	7.23426	1.2746e-11	0.697214	Med13	1.48666	0.999953	0.897984
Lcp2	1.95964	0.497127	0.155734	March5	2.48017	0.143785	0.152016	Exosc7	7.21551	1.46072e-11	0.669965	Itm2b	1.48584	0.999953	0.171556
Trip4	1.95875	0.497858	0.415137	Chd1	2.4764	0.144881	0.216017	Smarcb1	7.19868	1.64989e-11	0.692843	Parp8	1.4856	0.999953	1.16069
Ubr3	1.95615	0.500257	0.372602	Eva1b	2.47149	0.146107	0.163957	Psma2	7.18808	1.78017e-11	0.483019	Mob4	1.48484	0.999953	0.580217
Rps27rt	1.95374	0.501815	0.0838445	Nfix	2.46182	0.148453	0.0977235	Ndufa5	7.17939	1.89377e-11	0.651766	Kctd2	1.47882	0.999953	0.798743
Tm9sf4	1.95036	0.504833	0.251878	Man2a2	2.44699	0.153674	0.282711	Thop1	7.17078	2.01335e-11	1.2319	Ccnt2	1.47788	0.999953	0.879077
P2ry14	1.94622	0.50876	0.327041	Impact	2.44435	0.154388	0.238789	Clspn	7.16789	2.05273e-11	2.76612	Cox18	1.47238	0.999953	1.17272
Zfp874a	1.94565	0.509019	0.585079	Dpm1	2.44219	0.15521	0.172639	Vamp5	7.16473	2.09708e-11	0.444494	Plcl2	1.47221	0.999953	1.34189
Zfp638	1.94163	0.511985	0.13153	Chkb	2.44111	0.155463	0.545161	Tomm40	7.15709	2.20981e-11	0.739168	Atr	1.47081	0.999953	1.02988
Ssu72	1.93932	0.514089	0.0889119	Ggnbp2	2.43121	0.158285	0.14503	Kpnb1	7.14772	2.36184e-11	0.825979	Usp7	1.46531	0.999953	0.570736
Nudcd3	1.93851	0.51471	0.177174	Zbtb24	2.42913	0.159089	0.405649	Atic	7.12818	2.71791e-11	0.662722	Clca3a1	1.46268	0.999953	1.80865
Cdc42bpa	1.93794	0.51471	0.262324	Ctcf	2.42849	0.159264	0.114019	Cdc7	7.11796	2.9223e-11	2.49743	Tmx3	1.46162	0.999953	0.846558
2610035D17Rik	1.93084	0.521576	0.208398	Rps14	2.42031	0.162139	0.0187151	Bag1	7.11489	2.98304e-11	0.561687	Bloc1s2	1.46145	0.999953	0.76125
Cbx7	1.9281	0.52354	0.343436	Slc30a5	2.41022	0.165814	0.269787	Dhx9	7.11338	3.01066e-11	0.725107	Ccrl2	1.46092	0.999953	1.09855
Yipf4	1.92805	0.52354	0.127089	Cenpt	2.40805	0.166303	0.180949	Trim28	7.11167	3.04328e-11	0.642524	Ccdc174	1.46034	0.999953	0.668335
Rspry1	1.92771	0.52354	0.240134	Gsk3b	2.39364	0.1718	0.156187	Spcs3	7.11038	3.06669e-11	0.988844	Rps12-ps3	1.46022	0.999953	0.655561
Foxp1	1.92638	0.524821	0.0548398	Ppp1r12a	2.38295	0.175349	0.1377	Ndufb7	7.10881	3.09647e-11	0.547452	Trim30b	1.45858	0.999953	1.23062
Prr13	1.92054	0.530958	0.0608111	Taf13	2.38087	0.175921	0.422413	Mettl9	7.09931	3.31141e-11	0.716165	Rad54l2	1.45817	0.999953	1.46334
Smim26	1.91908	0.532417	0.307756	Klf11	2.36963	0.18066	0.718648	Fam69b	7.09693	3.36326e-11	0.732842	C1qtnf12	1.45542	0.999953	0.728909
Pak2	1.91827	0.532755	0.0986812	Itm2b	2.36429	0.182346	0.0371242	Mrpl17	7.0918	3.47864e-11	0.630951	Smtnl1	1.45507	0.999953	1.07287
Nedd4	1.91723	0.533377	0.0468323	Bckdha	2.36072	0.183879	0.187501	Smyd2	7.08562	3.63158e-11	0.718791	Actg1	1.4546	0.999953	0.18137
Zer1	1.91685	0.53352	0.255828	Wapl	2.35316	0.18694	0.121818	Smco4	7.06497	4.20061e-11	0.817711	Tmem106a	1.45443	0.999953	2.52942
Golga4	1.90776	0.541783	0.155628	Fam110c	2.34418	0.191015	0.318191	Rad51ap1	7.06408	4.22062e-11	4.13721	Tceal8	1.45086	0.999953	0.499107
Slc44a2	1.90677	0.542679	0.193441	Ctsf	2.34179	0.191879	0.20288	Pycard	7.05871	4.37978e-11	0.672635	Itgb7	1.44852	0.999953	1.74132
Tmem106b	1.9021	0.546525	0.348791	F2r	2.33858	0.193166	0.397631	Tgfb1	7.05659	4.4397e-11	0.645439	Rbm6	1.44765	0.999953	0.583618
Brd8	1.9015	0.546938	0.141754	Flot1	2.33798	0.193235	0.134351	Nubp1	7.05608	4.44856e-11	1.20689	Tor1aip2	1.44694	0.999953	1.11306
Ubxn4	1.9005	0.547853	0.0764711	Ebi3	2.32771	0.197735	0.160037	Ndufv2	7.05496	4.47718e-11	0.557277	Agfg1	1.44583	0.999953	0.865116
Tnfsf12	1.89859	0.549253	0.281393	Gpbp1	2.32137	0.200342	0.130322	Eif4a3	7.04069	4.94447e-11	0.664511	Clasrp	1.44507	0.999953	1.18329
B2m	1.89044	0.558549	0.018728	Slc30a9	2.31853	0.201485	0.300237	Ezr	7.03591	5.1084e-11	0.894381	Wdr89	1.44455	0.999953	0.507205
Stx16	1.8889	0.559934	0.154842	Kif23	2.3172	0.20207	0.349002	Ftsj3	7.02835	5.38438e-11	0.901155	Ube2d3	1.44326	0.999953	0.282257
Gm17473	1.88718	0.561345	0.80251	Card19	2.31203	0.204472	0.101575	Cox7b	7.02093	5.6595e-11	0.503484	Itgav	1.44039	0.999953	1.29293
Tigd2	1.88044	0.564634	0.166471	Eid3	2.31004	0.205139	1.2514	Hmbs	7.01831	5.75745e-11	1.11261	Gnb4	1.4377	0.999953	1.12174
Psmd9	1.87912	0.565915	0.194821	Etv6	2.30742	0.206222	0.114878	Psph	7.01009	6.09579e-11	0.975452	Ccdc191	1.43753	0.999953	1.23279
Plxna4os1	1.87186	0.573931	0.210406	Npc1	2.3066	0.206538	0.502783	Ncaph2	7.00862	6.15034e-11	0.875252	Dhx15	1.43671	0.999953	0.609217
Def6	1.87054	0.575298	0.103178	Haus2	2.30417	0.207612	0.449143	Ppif	7.00707	6.2042e-11	0.72414	Nek7	1.43659	0.999953	0.769869
Ngrn	1.86626	0.578485	0.18063	Hist3h2ba	2.30294	0.208035	0.54328	Dynll1	7.00695	6.2042e-11	0.615567	Dda1	1.43495	0.999953	0.65552
Hoxb3	1.86464	0.579571	0.502712	Gabarap	2.30054	0.208708	0.0565632	Psma1	6.99841	6.58339e-11	0.519345	Setdb2	1.43472	0.999953	2.21838
Mettl23	1.85314	0.590222	0.0920755	Prrc2c	2.29639	0.21062	0.0728784	Uqcrb	6.98724	7.11794e-11	0.413868	Trap1	1.43443	0.999953	0.611118
Rpp38	1.84934	0.594224	0.393141	Med16	2.28226	0.21713	0.309171	Rer1	6.98297	7.31406e-11	0.588514	Gadd45b	1.43408	0.999953	1.24667
Psmb5	1.84851	0.594282	0.0526042	Spry2	2.27885	0.218431	0.822872	Ppih	6.97361	7.80548e-11	0.94246	Adamts6	1.43273	0.999953	2.25586
Gypc	1.84608	0.595446	0.180031	Zfp787	2.27881	0.218431	0.262038	Nudt1	6.96925	8.0383e-11	1.04702	Ywhag	1.43256	0.999953	0.626889
Emc3	1.84572	0.595521	0.126025	Fbrsl1	2.2779	0.218687	0.48115	Chchd1	6.96649	8.18459e-11	0.620318	Ankib1	1.4315	0.999953	1.14119
Rpl29	1.84545	0.595521	0.0119454	1200007C13Rik	2.27711	0.218871	2.1587	Ndufb8	6.94457	9.53211e-11	0.547838	Ostc	1.43127	0.999953	0.423493
Snx10	1.84494	0.595578	0.0667001	Med13l	2.26182	0.225432	0.202741	Cpsf2	6.94455	9.53211e-11	0.82111	Unc93b1	1.42981	0.999953	0.729364
Fam174a	1.84319	0.596708	0.085257	Zfp212	2.24754	0.232864	0.36216	Ssr2	6.93327	1.03081e-10	0.587755	Dync1h1	1.42951	0.999953	0.683421
Rprd2	1.84305	0.596708	0.252105	Cebpz	2.23846	0.236512	0.113313	Metrn	6.93138	1.043e-10	1.77574	Ndufs7	1.42712	0.999953	0.292473
Insig2	1.84079	0.59871	0.295833	Sptan1	2.22877	0.241382	0.227534	Snrnp40	6.92467	1.0919e-10	0.663868	Lysmd2	1.42589	0.999953	0.743664
Il21r	1.83735	0.602953	0.102944	Kmt2a	2.22796	0.241382	0.105089	Cetn3	6.90925	1.21554e-10	0.540988	Osbpl8	1.42554	0.999953	0.672634
Car2	1.83708	0.602975	0.0352745	Atp2b4	2.2268	0.241914	0.128291	Trp53	6.88898	1.39524e-10	0.512532	Hdhd2	1.42402	0.999953	0.890092
Rsl24d1	1.83364	0.605518	0.0998868	Gtf2b	2.22162	0.24358	0.153454	Npm3	6.87611	1.5225e-10	0.582153	Plcl1	1.4225	0.999953	1.22823
Smim14	1.83129	0.60834	0.0589072	Mafg	2.22043	0.244035	0.147395	Gpaa1	6.8502	1.82256e-10	1.13633	Birc6	1.42027	0.999953	0.589689
Chordc1	1.8288	0.611366	0.187949	Pigp	2.21286	0.247661	0.0873968	Gps1	6.8414	1.93503e-10	0.760489	Mrpl54	1.4201	0.999953	0.46714
Rpl15	1.82805	0.61181	0.00760495	Yes1	2.21129	0.247872	0.428123	Nsg1	6.84013	1.94927e-10	2.1354	Cdc25a	1.4201	0.999953	1.27953
Gm20045	1.82537	0.614096	1.85081	Fam8a1	2.21117	0.247872	0.419016	Cyc1	6.83383	2.0336e-10	0.618037	Aifm1	1.4177	0.999953	0.845419
Ms4a6b	1.82177	0.616901	0.225213	Cish	2.21068	0.248038	0.212453	Vegfb	6.82636	2.13571e-10	0.871843	Olfr56	1.41542	0.999953	3.57955
Frmd8	1.82058	0.617291	0.198881	Runx2	2.20913	0.248587	0.219131	Hspa4	6.82234	2.19297e-10	0.629625	AI837181	1.41478	0.999953	0.746237
Nfkb1	1.81997	0.617778	0.110465	Pdhb	2.20714	0.249195	0.119169	Eif3i	6.81905	2.24022e-10	0.375397	2610008E11Rik	1.41361	0.999953	1.35257
Ascc1	1.81948	0.618096	0.176919	Gpr146	2.20371	0.250423	0.405437	Ndufa12	6.8125	2.33748e-10	0.51216	Idh3a	1.41267	0.999953	0.621668
Mtfr1l	1.81755	0.619575	0.106284	Fcer1g	2.20354	0.250423	0.167176	Anapc15	6.80967	2.38016e-10	1.57441	Ltb	1.40998	0.999953	0.373163
AI987944	1.81349	0.623138	0.337714	Ly6a	2.19679	0.253609	0.105493	Mfsd10	6.79653	2.59953e-10	0.672858	Nupr1	1.40758	0.999953	1.0653
Braf	1.81231	0.624061	0.312284	Upp1	2.19499	0.254627	0.192572	Cox6b1	6.79555	2.61328e-10	0.397252	Nup153	1.40723	0.999953	1.07237
Izumo4	1.8118	0.624406	0.265419	Zfp612	2.19426	0.25495	0.288444	Ube2l3	6.79517	2.61623e-10	0.551627	Sppl2b	1.40559	0.999953	1.59519
Mysm1	1.81134	0.624691	0.164404	Csnk1d	2.18904	0.257327	0.183342	Atp5a1	6.79072	2.69411e-10	0.31231	Nudt9	1.40466	0.999953	0.714055
Mesd	1.80906	0.625775	0.113643	Ilvbl	2.18469	0.259448	0.221622	Tk1	6.78524	2.7941e-10	5.87853	Ssbp3	1.40173	0.999953	0.45574
Acadm	1.80902	0.625775	0.100077	Tnfaip3	2.17643	0.263583	0.923176	Gpx4	6.77263	3.033e-10	0.307173	Tcea1	1.40168	0.999953	0.489037
2610044O15Rik8	1.80826	0.626479	0.454727	Bsdc1	2.17274	0.265571	0.36286	Anp32a	6.77237	3.033e-10	0.464776	Ubn2	1.40132	0.999953	0.535275
Anapc16	1.80671	0.627587	0.123123	Gmfg	2.17257	0.265571	0.112259	U2af2	6.77228	3.033e-10	0.677297	Slco3a1	1.40039	0.999953	0.920511
Ankrd16	1.80663	0.627587	0.389266	Tcf7l2	2.16696	0.2686	0.266571	Eftud2	6.77158	3.04322e-10	0.796169	Cand1	1.39787	0.999953	0.785518
Tmem128	1.80424	0.62816	0.126444	Tcf25	2.16286	0.270622	0.0895084	Cdc25a	6.7621	3.24409e-10	1.52952	Nsmce1	1.39559	0.999953	0.559358
5730409E04Rik	1.8036	0.628681	0.556205	Hif1a	2.16226	0.270778	0.267782	Itpa	6.76058	3.27335e-10	0.94468	Rbm43	1.39027	0.999953	0.656824
Tapbp	1.80317	0.628933	0.0765372	Fgfr1	2.16186	0.270778	0.565125	Pds5a	6.75937	3.29588e-10	0.713864	Larp1	1.38694	0.999953	0.575497
S100a13	1.80201	0.630182	0.054285	Mindy1	2.15887	0.272436	0.224812	Rpl4	6.75847	3.31155e-10	0.16111	Cript	1.3829	0.999953	0.520328
Slc38a9	1.80103	0.631199	0.220211	Fcgrt	2.15811	0.272804	0.172239	Srsf6	6.75414	3.4068e-10	0.554923	Yme1l1	1.37904	0.999953	0.6
Polr2h	1.7979	0.634126	0.108703	Arl4a	2.15778	0.27288	0.177501	Rnps1	6.72427	4.17799e-10	0.650492	Ngly1	1.37658	0.999953	0.695123
Gm26724	1.79566	0.636897	0.227786	Thbd	2.1566	0.273401	1.62378	Pole2	6.72144	4.25341e-10	2.51571	Hnrnpd	1.37442	0.999953	0.379456
Mamdc2	1.78959	0.644353	0.296897	Brd2	2.15591	0.273401	0.136966	Ube2t	6.71876	4.32606e-10	1.23011	H2-Ab1	1.37389	0.999953	0.817622
Kit	1.78727	0.647273	0.0638517	Arid4b	2.15337	0.274843	0.122501	Eny2	6.694	5.11029e-10	0.552655	Trip11	1.3736	0.999953	0.655286
Gdpgp1	1.78423	0.649783	0.840276	Slc20a1	2.14998	0.276449	0.541228	Atp5j	6.68832	5.30464e-10	0.316588	Ubl7	1.37325	0.999953	0.354447
Ssbp2	1.78311	0.650654	0.0516957	Cebpd	2.14367	0.280045	0.951207	Nelfe	6.67783	5.68973e-10	0.854721	Oas1g	1.37237	0.999953	3.18761
Yipf2	1.78211	0.651551	0.301475	Zfand6	2.14233	0.280517	0.0935333	Meaf6	6.67337	5.85699e-10	0.842932	Zmynd11	1.37091	0.999953	0.486442
Eea1	1.78197	0.651551	0.214234	Zfhx3	2.1368	0.283476	0.269894	Dnajc19	6.6681	6.06194e-10	0.680459	Ascc3	1.37009	0.999953	0.72816
B3galt4	1.78116	0.651981	0.698774	Rnf113a2	2.13489	0.284519	0.208337	Hras	6.66519	6.17439e-10	0.845471	Tbrg1	1.37009	0.999953	0.462811
Mcfd2	1.77821	0.653659	0.146298	Med20	2.13128	0.286273	0.243776	Pomp	6.66182	6.30797e-10	0.417964	Ice2	1.36676	0.999953	1.20814
Cpne2	1.77369	0.658312	0.0958603	Inf2	2.12215	0.290861	0.249308	Ywhae	6.65878	6.43026e-10	0.375559	Kdelr2	1.36395	0.999953	0.694077
Scp2	1.77343	0.65832	0.051125	Son	2.12207	0.290861	0.0651796	9130401M01Rik	6.64753	6.9311e-10	0.929804	A530040E14Rik	1.36383	0.999953	3.2029
Rps26	1.77053	0.661678	0.0216529	Trp53bp1	2.12052	0.291501	0.269976	Chchd6	6.64684	6.95344e-10	0.825452	Atp10a	1.36366	0.999953	1.50036
Sh3bgrl	1.76988	0.661678	0.0972925	Selenop	2.11994	0.291752	0.107242	Anp32e	6.64129	7.21012e-10	0.654044	Zfp524	1.36348	0.999953	1.20636
Tomm34	1.76983	0.661678	0.124156	Phf21a	2.11973	0.291752	0.185823	Gnl3	6.64089	7.21905e-10	0.563724	Rtraf	1.36261	0.999953	0.338934
Basp1	1.76927	0.662121	0.101925	Gm2a	2.11599	0.293511	0.167428	Gins4	6.62535	8.0029e-10	0.882412	Sppl2a	1.36068	0.999953	0.686832
Ywhab	1.76667	0.664044	0.0589585	Cd86	2.1124	0.295586	0.907422	Eloc	6.62015	8.26811e-10	0.605886	Gpcpd1	1.3605	0.999953	1.00132
Gm26782	1.76642	0.664044	0.295117	Eif4g2	2.11227	0.295586	0.0772665	Prmt3	6.62	8.26811e-10	0.696762	Tmem209	1.3605	0.999953	1.39996
Ccdc28b	1.76372	0.667033	0.229255	S100a11	2.10212	0.300427	0.0802914	Oser1	6.61789	8.37433e-10	0.806912	Kansl1l	1.3588	0.999953	0.760328
Matr3	1.76234	0.66776	0.0505644	Kdm7a	2.10208	0.300427	0.30786	Mrpl28	6.61686	8.4205e-10	0.67611	Atg4b	1.3574	0.999953	0.900122
Hgf	1.7607	0.669401	0.464729	Fbxl3	2.10016	0.301289	0.228767	Tex30	6.61608	8.45288e-10	1.16094	Cited2	1.35723	0.999953	0.484634
Ripor2	1.75777	0.672891	0.12692	Zfand1	2.09782	0.30255	0.228203	Ifrd2	6.60497	9.09869e-10	0.936243	Edf1	1.3553	0.999953	0.372272
Gabarapl1	1.74791	0.682956	0.0609891	Ctdsp2	2.09493	0.304052	0.170673	Ccdc34	6.60219	9.25747e-10	0.977512	Spata13	1.35494	0.999953	1.23045
Mfap1b	1.74469	0.685855	0.206152	Celf2	2.08305	0.311056	0.060684	Adk	6.59995	9.38489e-10	0.823575	Lamtor5	1.35489	0.999953	0.343248
Plekhj1	1.74398	0.686523	0.0687808	Il2rg	2.08157	0.311979	0.188931	Alad	6.59023	1.00056e-09	0.952116	Max	1.35477	0.999953	0.572479
Cep57l1	1.74286	0.687821	0.194057	Arhgdib	2.0774	0.313883	0.066663	Fam92a	6.58555	1.03112e-09	0.675267	Syngr2	1.35465	0.999953	0.415063
Fam207a	1.7399	0.690725	0.32117	Cytip	2.07235	0.316938	0.216375	Pole4	6.58228	1.05254e-09	0.681398	Riok2	1.35465	0.999953	0.714891
Yipf3	1.7382	0.692135	0.131757	Ppme1	2.07068	0.318064	0.243975	Qdpr	6.57677	1.0907e-09	0.63883	Nadk	1.35366	0.999953	0.8674
Sh3bp5	1.73311	0.697479	0.220089	Nsmce3	2.06671	0.32014	0.139657	Slc16a1	6.57098	1.13232e-09	1.45898	Irf5	1.34851	0.999953	1.44457
Stard4	1.73146	0.698822	0.216938	Fzd4	2.05306	0.328619	0.921015	Sf3b2	6.56552	1.17295e-09	0.413691	Rab29	1.34699	0.999953	1.43662
Gm36839	1.73133	0.698822	0.952634	Lgals1	2.05303	0.328619	0.228786	Sf3b5	6.56162	1.2006e-09	0.493184	AU020206	1.34424	0.999953	0.810831
Cnrip1	1.72478	0.706977	0.207595	Msi2	2.047	0.332253	0.0845663	Tufm	6.55542	1.24978e-09	0.837216	Zkscan1	1.34143	0.999953	0.7043
Timm10b	1.72261	0.708418	0.152135	Cfl2	2.04688	0.332253	0.141043	Suz12	6.5524	1.27354e-09	0.790872	Dcun1d5	1.34044	0.999953	0.465106
Adgrl4	1.72242	0.708418	0.0837512	Rnf11	2.04526	0.332691	0.172535	Rrs1	6.5284	1.49302e-09	0.80536	Gm17259	1.33986	0.999953	1.92823
Smim12	1.72209	0.708418	0.170094	Mef2d	2.03989	0.336393	0.227568	Smarca5	6.52355	1.53994e-09	0.517481	Jpt1	1.33909	0.999953	0.426581
Cpox	1.71444	0.717798	0.287101	Frat1	2.03748	0.3377	0.649647	Tmem256	6.51553	1.6223e-09	0.571141	Sf1	1.33635	0.999953	0.538061
Rtcb	1.71441	0.717798	0.0493628	Trp53inp2	2.02945	0.342405	2.28699	Atp5l	6.51086	1.66877e-09	0.361606	Khdrbs1	1.335	0.999953	0.431822
Mga	1.70991	0.722778	0.128645	Mgst2	2.02209	0.3469	0.372156	Hspbp1	6.50661	1.71424e-09	0.709732	Dido1	1.33442	0.999953	0.57933
Dpp8	1.70909	0.723666	0.233212	Prr13	2.02143	0.347094	0.0772235	Pbdc1	6.49377	1.86425e-09	0.710188	Khnyn	1.3329	0.999953	1.08844
Rpl7a	1.70671	0.726169	0.0202935	Ccdc86	2.01383	0.351304	0.186633	Txnl4a	6.49284	1.87323e-09	0.700999	Arid5a	1.3326	0.999953	1.28918
Prpsap2	1.70638	0.726294	0.373991	Slc35d1	2.01222	0.352119	0.639536	Chchd10	6.48684	1.94661e-09	0.737188	Ppt2	1.33249	0.999953	0.589451
Clta	1.70419	0.728913	0.0396786	Cdk9	2.00509	0.356891	0.105014	Mettl1	6.48545	1.96177e-09	0.663758	Sfi1	1.33243	0.999953	0.963786
Pmvk	1.70364	0.729287	0.270008	Zfp830	1.99852	0.361046	0.188901	Uqcr11	6.48282	1.99362e-09	0.475958	Cox6b2	1.33178	0.999953	0.804048
Chmp2a	1.70345	0.729287	0.0553884	Serp1	1.99558	0.36284	0.129139	Ide	6.4797	2.03237e-09	0.874239	Zfr	1.33032	0.999953	0.438182
Zscan2	1.70104	0.732244	0.288751	Chd7	1.99108	0.364906	0.463719	Ncapd3	6.45044	2.45931e-09	1.13306	Fbxl14	1.33015	0.999953	0.641102
Pafah2	1.70076	0.732288	0.246318	Kif18a	1.98915	0.366205	0.883117	Tubgcp2	6.44367	2.56801e-09	1.15034	Plcg1	1.32851	0.999953	1.23963
Rnf6	1.69774	0.734805	0.165934	Rab11b	1.98389	0.369501	0.0786492	Sms	6.4325	2.74498e-09	0.663865	Il15	1.32822	0.999953	0.846253
Aco2	1.69728	0.734805	0.104233	Cox8a	1.98102	0.371084	0.0418006	Tmem160	6.40746	3.23118e-09	0.63251	Dstyk	1.32687	0.999953	0.922805
Arap1	1.69304	0.740051	0.244522	Dbf4	1.97805	0.372648	0.422058	Amd1	6.40662	3.24462e-09	0.964414	Prkg1	1.3257	0.999953	1.08178
R3hdm4	1.68867	0.745729	0.0632089	Dst	1.9651	0.38202	0.174417	Gm47283	6.40476	3.27982e-09	0.539182	Pnpla2	1.32547	0.999953	0.483445
Pik3cg	1.68671	0.748024	0.217944	Wac	1.95851	0.386623	0.145884	Cntln	6.39947	3.39093e-09	0.896062	Dhx38	1.32471	0.999953	1.13923
Cxxc5	1.68475	0.74995	0.0649309	Zfand3	1.95383	0.389727	0.289578	Akip1	6.39047	3.59158e-09	1.12819	Rbm15	1.3236	0.999953	1.15119
Alcam	1.68358	0.750877	0.227042	Gpr171	1.95168	0.390675	0.160382	Rtn3	6.37466	3.97687e-09	0.645615	Tpst2	1.3236	0.999953	0.403736
Washc3	1.68317	0.750877	0.105744	Prkar1a	1.9516	0.390675	0.0819547	Mb21d1	6.36255	4.29765e-09	1.76302	Manf	1.31886	0.999953	0.420153
Osbpl8	1.682	0.752338	0.166918	Fam114a2	1.94181	0.397425	0.137398	Chchd2	6.3579	4.4237e-09	0.26367	Ptprc	1.31874	0.999953	0.306113
Trappc3	1.68119	0.752638	0.12167	Btg3	1.94167	0.397425	0.494296	Psme3	6.35415	4.52661e-09	0.902615	Iqgap1	1.31816	0.999953	0.414647
Pik3r1	1.68023	0.752646	0.0693699	Sp100	1.93917	0.399354	0.110753	Cavin3	6.35383	4.52991e-09	0.638695	Trim14	1.31804	0.999953	0.982929
Il15ra	1.68008	0.752646	0.247381	Arid4a	1.93825	0.399822	0.133867	Ndufaf2	6.34253	4.8617e-09	0.789413	Tcp11l1	1.31763	0.999953	1.4087
Rab32	1.67988	0.752646	0.320449	AW011738	1.93085	0.404778	0.972491	Bola2	6.34091	4.90663e-09	0.545333	Mapkapk2	1.3157	0.999953	0.672684
Jtb	1.67984	0.752646	0.0902339	Fggy	1.92707	0.407942	0.330066	Mtch1	6.33647	5.04307e-09	0.540702	Dusp11	1.31512	0.999953	0.497195
Hist4h4	1.67864	0.754152	1.20943	Prpf38b	1.92642	0.408351	0.10222	Ptrh2	6.33374	5.12626e-09	0.910176	Mpp1	1.315	0.999953	0.835973
Ttc14	1.67423	0.758835	0.0533171	Ccdc174	1.92352	0.410903	0.164166	Rcl1	6.32715	5.34252e-09	0.745499	Zfp639	1.31447	0.999953	1.08115
Thap7	1.67398	0.758835	0.234853	Gm45902	1.91109	0.419207	0.727384	Ahsa1	6.32551	5.39235e-09	0.562351	Ppp1cb	1.31436	0.999953	0.544484
Crebzf	1.6722	0.760851	0.107661	Hsf1	1.90981	0.420234	0.226438	Mtx2	6.32358	5.45292e-09	0.700792	Tsen34	1.3136	0.999953	0.576537
Ostc	1.66734	0.76654	0.0538045	Iqgap2	1.90436	0.42455	0.0900726	Gusb	6.31734	5.66595e-09	0.685513	Zfp800	1.3136	0.999953	0.73152
Irf6	1.66651	0.766647	0.466999	Epc1	1.90421	0.42455	0.211101	Snu13	6.31724	5.66595e-09	0.396535	Eif4g1	1.31213	0.999953	0.478993
Smim13	1.66433	0.768567	0.544507	Tmod3	1.9039	0.42455	0.0953558	Cyb5r1	6.31672	5.67745e-09	1.16681	Fam49b	1.31155	0.999953	0.551734
Zfp780b	1.66431	0.768567	0.461956	Triobp	1.90231	0.425502	0.111545	1190007I07Rik	6.31366	5.78291e-09	0.71607	Slirp	1.31108	0.999953	0.650948
Ipo11	1.66356	0.768777	0.0721612	Tnfrsf13c	1.9013	0.426277	0.442678	Gcsh	6.30924	5.94252e-09	0.7146	Znrf1	1.31061	0.999953	0.435893
Mtif3	1.66159	0.771147	0.376776	Trim27	1.89596	0.430693	0.124121	Mtap	6.30654	6.03901e-09	0.734662	Trappc6b	1.30979	0.999953	0.539796
Gimap5	1.65971	0.772636	0.0699373	Gnai2	1.88427	0.437042	0.0412279	Npepl1	6.29806	6.36325e-09	0.655509	Relt	1.30792	0.999953	1.08947
Rpl14	1.65813	0.773961	0.0186467	Sap30l	1.88377	0.437042	0.160393	Rrp1b	6.29237	6.59043e-09	0.889817	Pcna	1.3064	0.999953	0.78433
Exoc6b	1.65399	0.778266	0.237882	Pold4	1.88252	0.437879	0.0964889	Abcf2	6.28875	6.73704e-09	0.931389	Dnajc14	1.30465	0.999953	1.09767
Ss18	1.65313	0.778784	0.154307	Camk2n1	1.8808	0.438781	0.860776	Hnrnpm	6.28433	6.9223e-09	0.508146	Mrpl24	1.30418	0.999953	0.455066
Ercc1	1.64435	0.789448	0.357198	Zcrb1	1.87794	0.4403	0.12274	Hnrnpdl	6.27453	7.36251e-09	0.540382	Uqcr11	1.30137	0.999953	0.327234
Tug1	1.64368	0.789473	0.217482	Cyth2	1.87636	0.440964	0.225269	Hdlbp	6.2743	7.3636e-09	0.634653	Cct8	1.30067	0.999953	0.307739
Ifitm7	1.64331	0.789687	0.259855	Pkn1	1.87485	0.441861	0.123692	Prpf19	6.27215	7.45607e-09	0.69337	Nbea	1.30008	0.999953	0.953752
Rufy2	1.64281	0.790103	0.322509	B3gnt5	1.87294	0.443575	0.575989	Mrps26	6.26763	7.6659e-09	0.643919	Cfap97	1.29979	0.999953	0.774458
Pold4	1.63907	0.794618	0.0930514	Sh2b1	1.86917	0.446338	0.219466	Smarca4	6.26486	7.79273e-09	0.657111	Gm20300	1.29956	0.999953	1.68466
Rpl36a-ps1	1.63864	0.79467	0.151919	Cd74	1.86597	0.448334	0.177638	Sept11	6.25641	8.2162e-09	0.931514	Spen	1.29932	0.999953	0.574267
Acaa2	1.63736	0.795724	0.147413	Flywch1	1.86392	0.449793	0.139273	Pla2g12a	6.24896	8.6061e-09	0.856997	Acd	1.29757	0.999953	0.807884
Chchd4	1.63641	0.796595	0.174229	Slc25a25	1.86016	0.452579	0.869642	Utp18	6.24191	8.97921e-09	0.848468	Tuba1b	1.29622	0.999953	0.270174
Efna1	1.63264	0.801197	0.527258	Zfp771	1.85448	0.457143	0.16067	Arl6ip6	6.23762	9.21719e-09	1.08797	Eif3c	1.29459	0.999953	0.315223
Plec	1.62959	0.805703	0.109616	Mycbp2	1.85414	0.457288	0.0873993	Tubg1	6.22509	9.97143e-09	1.58452	Mecom	1.29301	0.999953	0.315224
Tab2	1.62918	0.805703	0.157525	Myof	1.85323	0.458016	0.210885	Mrps18b	6.22319	1.008e-08	0.767882	Cyfip2	1.29196	0.999953	0.516649
Pmm2	1.6275	0.807683	0.206887	Rras	1.85242	0.458366	0.101573	Ube2m	6.22211	1.0136e-08	0.550654	Fbxw7	1.28932	0.999953	1.09801
Snhg12	1.62661	0.807957	0.0722289	Ktn1	1.84303	0.465421	0.107162	Cdv3	6.22159	1.01461e-08	0.618215	Yeats4	1.28663	0.999953	0.376868
Ccnt2	1.62619	0.808249	0.223909	Swap70	1.8425	0.465756	0.176177	Mrpl21	6.22155	1.01461e-08	0.654027	Kars	1.28166	0.999953	0.684027
Pten	1.62343	0.811234	0.0829883	H2-T23	1.84025	0.467478	0.0589515	Pus1	6.21318	1.06736e-08	0.748069	Tdrd7	1.27944	0.999953	1.79013
Dok1	1.62222	0.81185	0.168462	Tor1aip1	1.83839	0.468991	0.155723	Ddx21	6.19071	1.22803e-08	0.658745	Rab2a	1.27909	0.999953	0.325227
Marveld1	1.62157	0.812321	0.182438	March7	1.83523	0.470972	0.128363	Aimp2	6.18974	1.23399e-08	0.816249	Rab11a	1.27862	0.999953	0.334559
Alkbh4	1.61547	0.819557	0.592626	Irf2	1.83352	0.471339	0.0658049	Nup43	6.18477	1.27187e-08	1.32873	Psmd9	1.27289	0.999953	0.71423
Fahd1	1.6153	0.819557	0.275902	0610037L13Rik	1.83293	0.471339	0.20899	Gtf2a2	6.17086	1.38715e-08	0.604374	Mcrip1	1.27236	0.999953	0.397334
Bloc1s5	1.61477	0.819647	0.343953	Cast	1.83176	0.472197	0.156231	Mrps25	6.17061	1.38751e-08	0.716737	Ipo7	1.27137	0.999953	0.694154
Mterf4	1.61414	0.819944	0.270392	Phf1	1.83129	0.472307	0.278955	Zfp367	6.16601	1.42666e-08	2.03297	Cd34	1.27125	0.999953	0.607137
Arfrp1	1.61411	0.819944	0.141044	H3f3a	1.8312	0.472307	0.0319242	Ppan	6.16429	1.43853e-08	0.617912	Lag3	1.26821	0.999953	1.63808
Smo	1.61313	0.820777	0.173402	Orai1	1.83065	0.472341	0.0728439	Dtnbp1	6.15924	1.48324e-08	0.571695	Top2b	1.26716	0.999953	0.470017
Ostf1	1.61039	0.824157	0.0722762	Limd2	1.83055	0.472341	0.0654281	Pno1	6.15608	1.51014e-08	1.16539	Rab1b	1.2661	0.999953	0.770277
Efcc1	1.6048	0.830411	0.324338	Tm9sf1	1.8304	0.472341	0.794816	Ube2n	6.15488	1.51876e-08	0.548212	Tomm22	1.26581	0.999953	0.418387
Tgtp2	1.6043	0.830411	0.463181	Aaed1	1.82726	0.474484	0.149739	Eif4g1	6.15244	1.54035e-08	0.608483	Usp1	1.26482	0.999953	0.697341
Tor4a	1.60369	0.830411	0.478878	9330020H09Rik	1.82617	0.475072	0.402615	Cops5	6.15126	1.54989e-08	0.595437	Fam184a	1.2647	0.999953	1.71281
Gtpbp2	1.60321	0.830411	0.104322	Anxa5	1.82573	0.475328	0.0668273	Vcp	6.15032	1.55707e-08	0.393368	Gm28187	1.26453	0.999953	1.37618
Ezh1	1.60319	0.830411	0.195304	Zbtb1	1.82138	0.478232	0.247166	Erp29	6.14575	1.60058e-08	0.533892	Mpc1	1.26295	0.999953	0.495966
Chmp1a	1.60148	0.831522	0.124261	Suco	1.81987	0.478783	0.231428	Nudt19	6.14395	1.61673e-08	0.829719	Isg20l2	1.26143	0.999953	0.723639
Ube2w	1.59732	0.835308	0.22196	Pdcl3	1.81887	0.479259	0.109884	Mgme1	6.14229	1.63162e-08	0.936639	Haghl	1.26143	0.999953	0.548587
Cyb5d2	1.59212	0.840972	0.586935	Cdk17	1.81876	0.479259	0.132343	1500009L16Rik	6.13382	1.7188e-08	1.06768	Hist3h2a	1.26131	0.999953	0.707835
Tmem164	1.58828	0.845399	0.287222	Ccdc59	1.81834	0.479259	0.132067	Cltb	6.12493	1.8131e-08	0.622349	Sirt1	1.26131	0.999953	1.10005
Trmt10a	1.58825	0.845399	0.378428	Atxn7l3b	1.81702	0.480323	0.063332	Tomm7	6.12492	1.8131e-08	0.420516	Gm46430	1.25991	0.999953	1.35391
Armc10	1.58824	0.845399	0.228101	Gatd1	1.81652	0.480448	0.130037	Cbfb	6.11638	1.91045e-08	0.743592	Stambpl1	1.25979	0.999953	1.83665
Phactr2	1.58777	0.845465	0.144145	Cryzl2	1.81644	0.480448	0.135689	Swi5	6.10487	2.05077e-08	0.375974	Rbm3	1.25821	0.999953	0.195135
Timm17b	1.58462	0.848004	0.12712	Rest	1.81563	0.480957	0.122067	Kmt5a	6.09867	2.12922e-08	0.746735	Mlx	1.25681	0.999953	0.982873
Spaca6	1.58162	0.851507	0.280557	Stxbp5	1.8152	0.480995	0.190488	Mthfd1l	6.09793	2.13636e-08	1.55201	Acsl3	1.25488	0.999953	0.701964
Fem1a	1.57878	0.855166	0.397545	Opa3	1.81437	0.481457	0.388208	Rwdd1	6.09732	2.14188e-08	0.595636	Polk	1.25458	0.999953	1.31607
Traf3ip3	1.57599	0.85873	0.0748882	Trim8	1.81399	0.481649	0.142798	Chchd3	6.09689	2.14494e-08	0.674334	Actr2	1.25394	0.999953	0.423898
Agpat4	1.57525	0.859072	0.245737	Malt1	1.81098	0.483799	0.359825	Med9	6.09357	2.18711e-08	0.749691	Eps15l1	1.2516	0.999953	0.932536
AW112010	1.57509	0.859072	0.0516618	Herpud2	1.81004	0.484379	0.197247	Fmc1	6.08535	2.29667e-08	0.596871	A630001G21Rik	1.25154	0.999953	0.917408
5930430L01Rik	1.5738	0.860479	0.733161	Sppl3	1.80851	0.485444	0.135692	Dbi	6.08455	2.30525e-08	0.428291	Cdkn2d	1.25142	0.999953	0.491453
Arfgap2	1.56842	0.867721	0.116381	Ccdc71l	1.80788	0.485659	0.300663	Eef1b2	6.06676	2.56592e-08	0.13254	2310009B15Rik	1.25055	0.999953	0.929927
Fermt3	1.56807	0.867928	0.0617276	Cul1	1.80765	0.485659	0.0992646	Ola1	6.06496	2.59153e-08	0.573543	Tubgcp5	1.25043	0.999953	1.17092
Mynn	1.56754	0.868174	0.231972	Slc7a6os	1.80568	0.486788	0.37893	Rpl35	6.06218	2.63015e-08	0.15814	Cpped1	1.2492	0.999953	0.9003
Trp53rka	1.56524	0.870789	0.266105	Ifngr1	1.80259	0.488806	0.107518	Mrps24	6.05363	2.77025e-08	0.485889	Pfdn1	1.24885	0.999953	0.440073
Psen2	1.5647	0.870875	0.220771	Birc2	1.80043	0.489816	0.140344	Eif1ad	6.04697	2.88364e-08	0.856618	Msn	1.24318	0.999953	0.374581
Slx1b	1.56343	0.872305	0.384103	Eif4e2	1.79811	0.491257	0.107991	Senp1	6.04504	2.91483e-08	0.979884	Lman2l	1.24201	0.999953	0.729806
Sppl2a	1.56219	0.874046	0.19594	Vim	1.79269	0.495411	0.0746471	Slc25a39	6.03896	3.02303e-08	0.696127	Ccni	1.23587	0.999953	0.521328
Scaper	1.56114	0.875463	0.23551	Nfil3	1.78795	0.498078	1.27937	Rpl15	6.03819	3.03369e-08	0.10509	Ythdf3	1.2337	0.999953	0.877442
Pear1	1.56071	0.875813	0.125449	Smim3	1.78789	0.498078	0.28596	Psmd11	6.03786	3.03629e-08	0.58219	Cep83	1.23236	0.999953	0.821834
Tle6	1.56024	0.875923	0.271973	Pdcl	1.78611	0.499378	0.222121	Cnih1	6.03085	3.15852e-08	0.67538	Mob1b	1.2309	0.999953	1.0135
Thoc2	1.56017	0.875923	0.118037	Gng5	1.78415	0.500878	0.0232223	Adsl	6.03069	3.15852e-08	0.728784	Mindy3	1.23066	0.999953	1.20453
Sptssa	1.55797	0.878689	0.0410011	Gimap5	1.78256	0.501762	0.104859	Ctbp1	6.03021	3.16395e-08	0.556946	Gm17473	1.23037	0.999953	1.62152
Tpt1	1.55783	0.878689	0.0106615	Smg1	1.77423	0.509213	0.186	Lrrc59	6.02895	3.1821e-08	0.729746	Fam168b	1.23014	0.999953	0.71293
Mthfsd	1.55674	0.879338	0.311376	Proser1	1.77227	0.51052	0.252922	H2afj	6.02889	3.1821e-08	0.493581	Spcs2	1.22902	0.999953	0.271186
Ctsb	1.55597	0.879869	0.0710019	Eif2s2	1.77085	0.511012	0.0714318	Nup93	6.0249	3.25764e-08	1.54012	Mrpl15	1.22885	0.999953	0.392836
Snrnp27	1.55534	0.879869	0.126133	Sys1	1.76319	0.5176	0.0836401	Wdr46	6.01747	3.40651e-08	0.905948	Mageh1	1.2275	0.999953	0.838762
Kdm2a	1.55392	0.881101	0.124073	Traf1	1.76197	0.518313	0.246885	Sfpq	6.01664	3.41982e-08	0.416235	Ubl5	1.2261	0.999953	0.319853
C530008M17Rik	1.55057	0.885272	0.209268	Plscr1	1.7615	0.518475	0.167508	Glrx3	6.01623	3.42441e-08	0.466076	Cib1	1.22557	0.999953	0.736039
Mr1	1.55042	0.885272	0.438082	Lst1	1.76121	0.51851	0.0629286	Jpt1	6.01528	3.44041e-08	0.602692	Stt3b	1.2247	0.999953	0.768702
Irgm2	1.54934	0.885434	0.46828	Btbd7	1.75742	0.521242	0.166603	Mrpl20	6.01254	3.49467e-08	0.560467	Icam1	1.2223	0.999953	0.727805
Tmem87a	1.54562	0.887843	0.3305	Egln3	1.75208	0.524865	0.734726	Snrpa	6.00935	3.55987e-08	0.57524	Cox4i1	1.22166	0.999953	0.195956
Gm46430	1.54334	0.889626	0.461826	Armcx5	1.74857	0.528412	0.320201	Pdxp	5.9952	3.87479e-08	1.4428	Timp3	1.22125	0.999953	1.30239
Papolg	1.54322	0.889626	0.421299	Sumo1	1.74129	0.534729	0.0439917	Creld2	5.98574	4.1018e-08	0.98598	Htr2a	1.21961	0.999953	1.70095
Atp6v0e	1.54234	0.890459	0.0428194	Tln1	1.74061	0.535072	0.060536	Pbrm1	5.98037	4.23429e-08	0.56732	Mpeg1	1.21914	0.999953	6.22452
Serinc3	1.54193	0.890459	0.0243174	Sf3b1	1.73815	0.537007	0.0621672	Pkig	5.97847	4.27576e-08	0.65406	Crtc1	1.21797	0.999953	1.01761
Tmem173	1.54167	0.890459	0.27893	Tceal9	1.7369	0.538221	0.0818483	Nbn	5.97839	4.27576e-08	1.20222	Nfkbiz	1.21663	0.999953	0.571716
Tmem35b	1.54159	0.890459	0.270592	mt-Co3	1.73206	0.542255	0.0124522	Dnajc2	5.96728	4.5663e-08	0.566055	Cox7b	1.21522	0.999953	0.373306
Arrb1	1.54086	0.891318	0.270911	Ptk2b	1.73109	0.542715	0.135885	Tomm5	5.94605	5.18694e-08	0.485885	2610001J05Rik	1.21522	0.999953	0.445981
Mtpap	1.53992	0.891751	0.207732	N4bp2l1	1.72709	0.545912	0.256365	Psma6	5.94511	5.21044e-08	0.444538	Azin1	1.21516	0.999953	0.939468
Mxd4	1.53947	0.891889	0.136994	Rela	1.72593	0.546919	0.151953	Nme4	5.94149	5.31421e-08	0.626885	Brd1	1.21475	0.999953	0.415014
Zufsp	1.53879	0.892514	0.129176	Ablim1	1.72277	0.549714	0.256789	Fdps	5.9344	5.54244e-08	0.812959	Nup98	1.2147	0.999953	0.609497
Med12	1.53586	0.895705	0.285667	Eif3h	1.71999	0.551836	0.0315459	Ltv1	5.93361	5.56232e-08	0.799996	Pdik1l	1.21329	0.999953	1.24591
Lars2	1.53546	0.895705	0.316658	Zfp516	1.71455	0.555326	0.409466	Tecr	5.93292	5.57914e-08	0.433069	Fgfr1	1.21037	0.999953	1.29272
9530068E07Rik	1.53536	0.895705	0.113435	Rfxap	1.71418	0.555515	0.185226	Arpc1b	5.93177	5.61173e-08	0.277479	Meg3	1.20861	0.999953	0.735217
Limd2	1.53339	0.897133	0.0366122	N4bp2l2	1.7083	0.560874	0.0975709	Hnrnpr	5.92767	5.74673e-08	0.490459	Uvrag	1.20838	0.999953	0.768625
Shprh	1.53073	0.900214	0.251353	Cyhr1	1.70692	0.562061	0.129497	Mrps28	5.92407	5.86039e-08	0.682307	Acp2	1.20814	0.999953	1.20883
Ing1	1.52882	0.902248	0.12518	Pias1	1.70619	0.562116	0.182542	Me2	5.92285	5.89681e-08	1.5412	Rufy2	1.20803	0.999953	0.883601
Irak4	1.52872	0.902248	0.423071	Relb	1.70611	0.562116	0.384002	Nudt21	5.91286	6.25867e-08	0.580866	Ptrh2	1.20692	0.999953	0.721997
Abhd18	1.52708	0.904629	0.387076	Man1a	1.70213	0.564744	0.150887	Thoc7	5.90448	6.57751e-08	0.514964	Pde7a	1.20674	0.999953	1.20353
Rpp14	1.5252	0.906748	0.166595	Zscan18	1.69983	0.566462	0.657451	Strap	5.89842	6.81342e-08	0.564799	Bag6	1.20633	0.999953	0.564042
Susd1	1.52395	0.908142	0.348626	Jmy	1.69977	0.566462	0.217184	Mrpl36	5.89828	6.81342e-08	0.629023	Cxxc1	1.20499	0.999953	0.82793
Pibf1	1.52369	0.908191	0.25903	Med29	1.69746	0.568568	0.186944	Osgep	5.8807	7.56012e-08	0.616204	Man1a2	1.2044	0.999953	0.606112
Ttf1	1.52262	0.908583	0.284088	Sh3gl1	1.69662	0.569256	0.159845	Fkbp5	5.87987	7.58917e-08	1.06454	Phip	1.20417	0.999953	0.541233
Ms4a6c	1.52242	0.908583	0.254392	Znrf1	1.69428	0.570313	0.0954063	Polr3k	5.87938	7.60281e-08	0.70901	Fam35a	1.20347	0.999953	1.26056
Ccdc47	1.52009	0.910128	0.10823	Cd44	1.69138	0.572208	0.151172	Fh1	5.87366	7.86103e-08	0.645261	Rnf122	1.203	0.999953	1.20479
Phc2	1.52007	0.910128	0.15786	Pafah1b1	1.69036	0.573208	0.0660361	Emc8	5.87278	7.89342e-08	0.712916	Psmd6	1.20294	0.999953	0.4416
Emg1	1.5175	0.912795	0.0326121	Rab10os	1.68439	0.577428	0.197441	Sf3b4	5.8724	7.90249e-08	0.677494	Scyl2	1.20276	0.999953	1.15902
Leng9	1.51642	0.91337	0.355934	Foxp1	1.68213	0.578689	0.0746618	Baz1a	5.86783	8.10464e-08	1.05754	Nfkbie	1.20195	0.999953	1.313
1110012L19Rik	1.51423	0.915639	0.186319	Arid5b	1.67888	0.580733	0.286594	Naa10	5.86726	8.12299e-08	0.554871	Zfp687	1.20142	0.999953	1.01933
Hemk1	1.514	0.915642	0.713175	Sbds	1.67596	0.58377	0.0916525	Arpc5l	5.86663	8.1444e-08	0.577333	Trmt1l	1.20142	0.999953	0.656311
Timm22	1.51193	0.918119	0.150537	Gsta4	1.67489	0.584379	0.243134	Pradc1	5.86356	8.28686e-08	1.18746	Vta1	1.20089	0.999953	0.587999
Slc2a3	1.51193	0.918119	0.151922	Top2b	1.67404	0.584615	0.0837744	Fxn	5.86037	8.43799e-08	0.926739	Ms4a4b	1.20083	0.999953	5.03031
Trip12	1.50723	0.924553	0.184893	Mpnd	1.67394	0.584615	0.187662	Tmem109	5.85154	8.888e-08	0.863268	Sptbn1	1.20013	0.999953	0.345506
Eps8	1.50499	0.927699	0.328761	Cd34	1.66832	0.590343	0.164788	Elob	5.84712	9.11681e-08	0.33556	Tmem50a	1.19996	0.999953	0.237165
Mbtd1	1.5041	0.92889	0.152253	Ppp1r18	1.66408	0.594181	0.13159	Tsfm	5.84555	9.19236e-08	0.763679	Xrn1	1.19972	0.999953	0.62117
Pbxip1	1.50315	0.929245	0.230704	Samsn1	1.66268	0.59498	0.0818677	Dnajb11	5.84003	9.48062e-08	0.682255	2510009E07Rik	1.19481	0.999953	2.16014
Gnl3l	1.50133	0.931423	0.243405	Pcmtd1	1.65556	0.600541	0.112571	Gsr	5.83826	9.57057e-08	0.713908	Ppp4r3a	1.19417	0.999953	0.529808
Snrnp48	1.50058	0.93236	0.0885825	Cd28	1.65441	0.601736	2.00788	Erg28	5.82454	1.03672e-07	0.586062	Sdcbp	1.19399	0.999953	0.257232
Dock1	1.50029	0.932461	0.333907	Commd7	1.65366	0.602202	0.0676867	Acp1	5.81654	1.08629e-07	0.553274	Alkbh6	1.193	0.999953	0.7442
Vps9d1	1.4968	0.937137	0.371186	Hnrnph2	1.65263	0.602784	0.119601	Stoml2	5.80741	1.1459e-07	0.608917	Rwdd3	1.19288	0.999953	1.21865
Fam208a	1.49493	0.940114	0.148651	Mapk1ip1	1.64876	0.605985	0.311369	Eri1	5.80627	1.15238e-07	0.739784	H2-DMb1	1.19241	0.999953	0.590134
Entpd6	1.49409	0.940405	0.394583	Smagp	1.63204	0.620828	0.224203	Immt	5.80569	1.15429e-07	0.557403	Abhd6	1.19159	0.999953	1.6498
Epb41l4aos	1.48858	0.948104	0.0778458	Atg16l1	1.63101	0.621315	0.289622	Mrps17	5.80009	1.19162e-07	0.55823	Clic4	1.19153	0.999953	1.01601
Got2	1.48804	0.948104	0.115315	Fam96b	1.62901	0.623147	0.120084	Galnt1	5.77642	1.36461e-07	0.663022	Pigv	1.19107	0.999953	1.19861
Rps6	1.48738	0.948252	0.00844261	Sfswap	1.62656	0.624606	0.141298	Pmm1	5.76928	1.42155e-07	0.984507	Tmem229b	1.19037	0.999953	1.39744
Tbce	1.48655	0.948492	0.215757	Bcl2l11	1.62604	0.624815	0.707559	Rcc2	5.76268	1.47495e-07	0.465505	Smpdl3a	1.1875	0.999953	0.322171
Elovl1	1.48608	0.948492	0.155149	Spata6	1.62533	0.625224	0.358947	Sgf29	5.76156	1.48311e-07	0.608367	Nbn	1.18721	0.999953	0.972483
mt-Nd5	1.48591	0.948492	0.00986049	Lmna	1.62455	0.625719	0.70263	Alkbh1	5.75847	1.50377e-07	0.589558	Ranbp2	1.18709	0.999953	0.448191
Ccdc71	1.48205	0.953244	0.317447	Cyr61	1.62378	0.625719	2.8971	Nup210	5.75827	1.50377e-07	0.962147	Ppp1r10	1.18557	0.999953	0.51672
Use1	1.48128	0.95423	0.0376816	Gnaq	1.62219	0.626155	0.18455	Pycrl	5.7463	1.61235e-07	0.719428	Arl6ip1	1.18452	0.999953	0.29582
Txndc9	1.48002	0.955296	0.0699802	Retreg1	1.62166	0.626362	0.0868449	Ctdspl	5.74182	1.65377e-07	0.807503	Anxa7	1.1837	0.999953	0.400366
Sap30bp	1.47949	0.955296	0.248018	Bbc3	1.61891	0.627743	0.322177	Eefsec	5.74159	1.65412e-07	0.969974	Agk	1.18282	0.999953	0.542085
Arpc1a	1.47911	0.955296	0.0625784	Mapkapk3	1.61549	0.630712	0.170256	Slc43a3	5.7414	1.65412e-07	1.34119	Taok1	1.18264	0.999953	0.57704
Emcn	1.47626	0.959292	0.122583	Supt20	1.61337	0.63248	0.115616	Shisa8	5.73313	1.73496e-07	0.660161	Selenot	1.18188	0.999953	0.584706
Med19	1.47358	0.960567	0.174334	Gla	1.60922	0.636412	0.838272	Mrpl51	5.72314	1.83815e-07	0.578928	Ddx39	1.18124	0.999953	0.66962
Tmem101	1.4722	0.96199	0.246854	Stat4	1.60195	0.641299	0.152868	Polr2e	5.71531	1.92267e-07	0.450067	Sik3	1.18107	0.999953	0.730161
Tlk1	1.47052	0.962523	0.174995	Id2	1.601	0.642054	0.446619	Slc35b2	5.71265	1.95075e-07	0.810195	Bcl10	1.17849	0.999953	0.55055
Cyp2j9	1.46892	0.964478	0.295897	Sar1a	1.59926	0.643354	0.098672	Txn2	5.71146	1.96234e-07	0.492658	Sfpq	1.1782	0.999953	0.376957
Nfkbie	1.46839	0.96451	0.41319	Anks1	1.59385	0.648182	0.194036	Yif1b	5.7111	1.96424e-07	0.562767	Ndufa3	1.17779	0.999953	0.34166
Slc6a6	1.46639	0.967476	0.127937	Tmem167b	1.59369	0.648182	0.338729	Hnrnpl	5.71026	1.97182e-07	0.536023	Kctd20	1.17744	0.999953	0.857295
Prkag2	1.46515	0.968528	0.192185	Ube2j1	1.59195	0.649315	0.318495	Rdx	5.69881	2.10659e-07	0.502073	Ptdss2	1.17621	0.999953	0.916971
Fryl	1.4649	0.968572	0.238501	Rab8b	1.58802	0.652379	0.207089	Khdrbs1	5.69298	2.17745e-07	0.518558	Snx27	1.17609	0.999953	0.853684
Chst12	1.46459	0.968731	0.164182	Parp8	1.58669	0.653792	0.288614	Akt1	5.69006	2.21252e-07	0.495709	Ppp1r12a	1.17604	0.999953	0.444408
Lbp	1.46351	0.96879	0.118845	Rala	1.57627	0.663901	0.218854	Timm9	5.68914	2.21933e-07	0.580403	Arhgap6	1.17592	0.999953	0.71987
Ebpl	1.46349	0.96879	0.0939454	Pcp4l1	1.57485	0.664547	0.172441	Psma5	5.68897	2.21933e-07	0.416483	Neurl3	1.17586	0.999953	0.307077
Sigmar1	1.463	0.968913	0.20944	Gm973	1.57456	0.664547	0.345144	Trim27	5.68602	2.25547e-07	0.578376	Lsm4	1.17422	0.999953	0.299907
2900076A07Rik	1.45823	0.975098	0.655839	Selenot	1.57399	0.664819	0.121206	Ogfod3	5.68581	2.25582e-07	1.26799	Zfp672	1.17387	0.999953	0.968798
D630039A03Rik	1.4579	0.975292	0.347548	Sod1	1.5733	0.66549	0.111946	Bsg	5.68499	2.2641e-07	0.357524	Stk38	1.1734	0.999953	0.689549
Ncoa7	1.45674	0.975789	0.126719	Aldoc	1.57076	0.667902	0.211539	Canx	5.67919	2.33968e-07	0.464544	Gsdme	1.17311	0.999953	0.744338
Tns2	1.45587	0.976559	0.275996	Nsrp1	1.56184	0.675227	0.132053	Eif3g	5.66284	2.57115e-07	0.492246	Dera	1.17182	0.999953	0.64563
Eif3k	1.45539	0.977035	0.0274713	Plekhb2	1.5614	0.675566	0.245349	Usp39	5.66152	2.58818e-07	0.902021	Fas	1.17048	0.999953	2.20082
Zfp467	1.45479	0.977742	0.102044	Zmiz1	1.56053	0.6765	0.117321	Prpf4	5.65904	2.62308e-07	0.844814	March2	1.16919	0.999953	0.624561
Cwc27	1.45383	0.978695	0.216354	Cd1d1	1.55794	0.678499	0.206839	Lsm8	5.65583	2.66964e-07	0.569442	mt-Nd3	1.1689	0.999953	0.133704
Uso1	1.45288	0.980048	0.277475	Cdk7	1.55759	0.678499	0.165993	Xrn2	5.65414	2.69307e-07	0.532797	H2-Eb1	1.16878	0.999953	0.817018
Atp6v1b2	1.45167	0.980981	0.149199	Kif5b	1.55611	0.679764	0.0853645	Tcf3	5.64558	2.82218e-07	0.601277	Sfxn2	1.16726	0.999953	1.21844
Zfp84	1.45025	0.982851	0.397378	Rab33b	1.55211	0.682517	0.497844	Asns	5.64553	2.82218e-07	1.14025	Rbbp4	1.16709	0.999953	0.344006
Plxnc1	1.44943	0.983543	0.0847021	Micall1	1.55208	0.682517	0.44794	Ap2s1	5.6412	2.88779e-07	0.507426	Phpt1	1.16633	0.999953	0.800391
Pi4k2a	1.4478	0.985959	0.268272	Lin37	1.54964	0.684462	0.179972	Caprin1	5.6404	2.89807e-07	0.503767	Nudt4	1.16568	0.999953	1.02437
Hoxa9	1.44747	0.985959	0.0916191	Atxn2l	1.54557	0.688659	0.151917	Macrod1	5.63531	2.98186e-07	0.848007	Ccl27a	1.16522	0.999953	0.705698
Tmem260	1.44489	0.989826	0.266748	Araf	1.5439	0.690371	0.125606	Pih1d1	5.61303	3.38879e-07	0.650026	Tm9sf4	1.16393	0.999953	0.70881
Plcg2	1.44312	0.992007	0.119383	Trim39	1.54325	0.690371	0.4816	Blvra	5.60837	3.47016e-07	0.828025	A730011C13Rik	1.16177	0.999953	4.20607
Atp6v1f	1.44179	0.993672	0.0235193	Stxbp2	1.54305	0.690371	0.101455	Ripk3	5.60536	3.52526e-07	0.671103	Dpm2	1.15796	0.999953	0.453145
Ramp2	1.43918	0.99689	0.421636	Pcif1	1.54201	0.691542	0.171261	Clns1a	5.60479	3.53116e-07	0.561894	Hoxb5	1.15674	0.999953	1.08986
Rab35	1.43695	0.998992	0.144366	Stk24	1.54107	0.692124	0.0725402	Bri3bp	5.60416	3.54022e-07	0.670507	Psmf1	1.15638	0.999953	0.927586
Trip11	1.43665	0.999142	0.164509	Rasl11b	1.54086	0.692124	1.52932	Pcmt1	5.5915	3.79619e-07	0.559225	Lamp2	1.15562	0.999953	0.363529
Tnrc6a	1.43592	0.99929	0.138441	Xrcc4	1.53889	0.693583	0.202517	Mtch2	5.59033	3.81363e-07	0.569136	Cep70	1.15445	0.999953	0.861485
Tmem205	1.43542	0.99944	0.0928257	Zbtb7a	1.53449	0.697799	0.0937982	Hmces	5.58788	3.86382e-07	1.13139	E130102H24Rik	1.15299	0.999953	1.13789
Trmt12	1.43489	0.999506	0.571565	Gm20467	1.53285	0.698404	0.177159	Psmc3	5.5859	3.90395e-07	0.535758	H2-Q10	1.15095	0.999953	1.08683
Rps25	1.43437	0.999506	0.014046	1110038F14Rik	1.5295	0.701541	0.102785	Grk6	5.579	4.05749e-07	0.783078	Herpud2	1.14942	0.999953	0.707533
Trim5	1.43432	0.999506	0.381851	Fbxo9	1.52909	0.701853	0.0650048	Commd3	5.57802	4.07613e-07	0.545119	Tsn	1.14855	0.999953	0.297327
Mrpl34	1.43423	0.999506	0.0603316	Zc3h13	1.52634	0.704912	0.125175	Spout1	5.57667	4.10353e-07	0.927351	Rit1	1.14831	0.999953	0.720764
Rabep2	1.434	0.999523	0.258477	Plk3	1.523	0.708783	0.901966	Plp2	5.56117	4.47583e-07	0.690726	Pdia3	1.14744	0.999953	0.375993
Ext2	1.43374	0.99959	0.119321	Dcxr	1.51801	0.714235	0.252827	Isyna1	5.54632	4.86755e-07	0.790128	Vcpip1	1.14726	0.999953	0.730884
Gnai3	1.43301	0.999927	0.0814409	Arhgap15	1.51486	0.717563	0.131417	Ap1s1	5.54152	4.99246e-07	0.61467	Erp27	1.14574	0.999953	1.30565
Jpx	1.43194	0.999927	0.356033	Med6	1.51068	0.721705	0.24189	Ndufc1	5.54064	5.01218e-07	0.505468	Pnrc1	1.14539	0.999953	0.201371
Rpl35	1.43151	0.999927	0.0118096	Gm16124	1.50896	0.723399	0.210935	Ywhab	5.53949	5.03992e-07	0.434654	Rtf1	1.14533	0.999953	0.350958
Kdm1a	1.42878	0.999927	0.116015	Hnrnpdl	1.50847	0.723833	0.0734055	Nudcd2	5.53475	5.17277e-07	0.714515	Pip5k1b	1.14287	0.999953	1.35137
Inpp5k	1.42789	0.999927	0.129221	Ogdh	1.50672	0.724703	0.1358	Arl6ip4	5.53226	5.24115e-07	0.582067	Pole3	1.14159	0.999953	0.578908
Gm26510	1.42479	0.999927	0.391451	A430046D13Rik	1.50631	0.724703	0.277052	Rnf219	5.52861	5.34583e-07	0.869926	Emc9	1.14077	0.999953	1.4639
Timm10	1.42348	0.999927	0.136838	Tgif1	1.50624	0.724703	0.220407	Ubr7	5.5281	5.35566e-07	1.01446	Gpr157	1.13866	0.999953	1.90736
Rbpms	1.42118	0.999927	0.0643474	Il18bp	1.50332	0.727303	0.345843	Mrpl15	5.52582	5.42022e-07	0.549874	Prps1	1.13855	0.999953	0.727127
Med21	1.42069	0.999927	0.130148	Snapin	1.503	0.727497	0.162652	Rps19	5.5245	5.45541e-07	0.0846177	Il27ra	1.13784	0.999953	0.63931
Pet100	1.42062	0.999927	0.119721	Gbp2	1.50242	0.727821	0.151315	Bckdk	5.52006	5.58909e-07	0.609872	2210016F16Rik	1.13732	0.999953	0.615942
Fnbp1l	1.42011	0.999927	0.160586	Msl2	1.50188	0.728321	0.183509	Arhgdia	5.51811	5.64552e-07	0.440593	Chpf2	1.13656	0.999953	0.795782
Chil5	1.41896	0.999927	0.368706	Fgd5	1.49947	0.72971	0.21564	Bola3	5.51745	5.66085e-07	0.566841	Arl10	1.13469	0.999953	1.19556
Retreg3	1.41817	0.999927	0.416635	Tmem53	1.49821	0.730742	0.438839	Ccdc124	5.51105	5.86452e-07	0.795153	Nudt18	1.13463	0.999953	0.80496
Gorab	1.41719	0.999927	0.427899	Dph3	1.49743	0.731036	0.106771	Wee1	5.50167	6.17239e-07	0.786096	Immp2l	1.13363	0.999953	0.689917
2810004N23Rik	1.41699	0.999927	0.103871	Atp6v1h	1.4935	0.734634	0.179375	Pfas	5.49195	6.51509e-07	1.33974	Atp5j	1.13358	0.999953	0.258976
Sord	1.41642	0.999927	0.0541305	Slfn5	1.49299	0.7351	0.230154	Thyn1	5.48592	6.73441e-07	0.626652	Rgs7bp	1.13194	0.999953	1.52831
Tmed4	1.415	0.999927	0.11189	Tacstd2	1.49195	0.73576	0.425301	Mrpl40	5.48489	6.76668e-07	0.626998	Phactr1	1.13071	0.999953	1.22555
Terf2ip	1.41435	0.999927	0.200424	Dock2	1.49173	0.73576	0.0694063	Bop1	5.48032	6.93679e-07	0.986533	Mier1	1.13018	0.999953	0.405526
Fam3a	1.41366	0.999927	0.302755	Osgin1	1.48777	0.738479	0.387242	Hdgfl2	5.47481	7.14874e-07	0.771785	Rffl	1.13012	0.999953	1.11438
Ep400	1.41226	0.999927	0.112483	Fzd9	1.48759	0.738484	0.931596	Ints7	5.45948	7.77836e-07	0.916554	Nsd3	1.12936	0.999953	0.552193
Gfi1b	1.40941	0.999927	0.18684	Usp38	1.48226	0.742798	0.399683	Acat1	5.45915	7.78445e-07	0.494109	Tfec	1.12931	0.999953	0.788519
Pwwp2a	1.40919	0.999927	0.218916	Fem1c	1.47931	0.744407	0.245831	Cct2	5.44956	8.19931e-07	0.378084	Gsap	1.12825	0.999953	1.14575
Ppic	1.40891	0.999927	0.103781	Zscan26	1.47803	0.745205	0.232363	Psmd2	5.44904	8.21494e-07	0.532874	4932438A13Rik	1.12545	0.999953	0.596656
Fam120b	1.40884	0.999927	0.262432	Git2	1.47681	0.746556	0.0607415	Trmt6	5.44764	8.27119e-07	0.767774	Armc5	1.12539	0.999953	1.42506
Sirt4	1.40872	0.999927	0.581714	Zcchc11	1.47517	0.747382	0.0688484	E2f4	5.44273	8.49389e-07	0.641392	Ttll4	1.12463	0.999953	1.95199
Gria3	1.40451	0.999927	0.339852	Scand1	1.47489	0.74753	0.0713519	Slc1a5	5.43375	8.90542e-07	0.722584	St13	1.12363	0.999953	0.369967
Idnk	1.40234	0.999927	0.0930583	Susd6	1.47253	0.749648	0.257746	Vamp8	5.43329	8.91931e-07	0.292798	Atg4d	1.12205	0.999953	1.25627
Npc2	1.40122	0.999927	0.034115	Gabbr1	1.46974	0.750994	0.14471	Ndufb9	5.43297	8.92632e-07	0.344861	Zfp111	1.11966	0.999953	1.39687
Srek1	1.39997	0.999927	0.0991771	Oser1	1.46931	0.751247	0.151948	Wdr18	5.4326	8.93565e-07	0.640509	Txndc12	1.11808	0.999953	0.79162
2510002D24Rik	1.39994	0.999927	0.105856	Wipi2	1.46886	0.751644	0.178034	Kdelr2	5.42753	9.18354e-07	0.584961	D630036H23Rik	1.11498	0.999953	3.43949
2410080I02Rik	1.39912	0.999927	0.870248	Zfp579	1.4681	0.752229	0.233908	Taf1d	5.40879	1.01879e-06	0.478888	Sf3a2	1.11416	0.999953	0.606476
Lrrcc1	1.39551	0.999927	0.126201	Zfp281	1.46614	0.75339	0.289133	Cox4i2	5.4056	1.03492e-06	1.25147	Irf8	1.11164	0.999953	2.05088
Ppcs	1.39103	0.999927	0.313809	Tceal1	1.46609	0.75339	0.253833	Etfa	5.40543	1.03492e-06	0.582519	Erap1	1.11123	0.999953	0.590888
Foxred2	1.39066	0.999927	0.300858	Nr3c1	1.46563	0.75339	0.129993	Mrpl58	5.39926	1.07006e-06	0.69163	Zfp174	1.10977	0.999953	3.25708
Lap3	1.38964	0.999927	0.0961305	5033430I15Rik	1.46562	0.75339	1.02345	Zfp422	5.38529	1.15542e-06	0.547591	Glipr1	1.10895	0.999953	0.401608
Rpap1	1.38909	0.999927	0.316927	Trafd1	1.46409	0.753853	0.14075	Uck2	5.37252	1.23784e-06	0.798772	Mphosph8	1.10837	0.999953	0.49196
Aftph	1.38771	0.999927	0.131465	Nsmf	1.4638	0.753853	0.323108	Eno1	5.37081	1.24833e-06	0.523903	Acbd3	1.10819	0.999953	0.571422
Wls	1.3868	0.999927	0.076427	Ngdn	1.46363	0.753853	0.105674	Psmb4	5.36834	1.26428e-06	0.366717	Lyrm2	1.10708	0.999953	0.794011
Cpsf6	1.38484	0.999927	0.0966141	Gosr2	1.46346	0.753853	0.231548	Mre11a	5.36312	1.30006e-06	0.982981	Kalrn	1.10685	0.999953	1.78882
Zfp607a	1.38467	0.999927	0.629867	Sec61a1	1.46222	0.755144	0.161773	Skp2	5.35609	1.35028e-06	1.51587	Polr3b	1.10544	0.999953	1.58285
Timm21	1.38363	0.999927	0.17396	Zc3h10	1.4609	0.756036	0.320004	Cnot9	5.35155	1.38324e-06	1.28905	Smurf2	1.10509	0.999953	1.2159
Men1	1.38295	0.999927	0.201961	Sertad3	1.46012	0.756648	0.322415	Tacc3	5.3513	1.38373e-06	2.12791	Gdap2	1.10492	0.999953	1.87721
Sfxn1	1.38202	0.999927	0.0841876	S100a6	1.45867	0.757742	0.0734816	Coro1a	5.34185	1.45644e-06	0.309941	Gata3	1.10381	0.999953	0.594106
Fibp	1.38135	0.999927	0.145046	Kmt2e	1.45427	0.761831	0.0638691	Dhrs13	5.33615	1.49989e-06	1.58004	Fam98b	1.10293	0.999953	0.708361
Rpl10-ps3	1.37967	0.999927	0.084347	B9d2	1.45366	0.762404	0.128482	Phf10	5.33407	1.5127e-06	0.760371	Nus1	1.10182	0.999953	0.79206
Trove2	1.37852	0.999927	0.216667	Hk2	1.45157	0.764482	0.301352	Oaz1	5.33327	1.51785e-06	0.179428	Mb21d1	1.10018	0.999953	1.4611
Smim24	1.37711	0.999927	0.12521	Tmem87b	1.45026	0.765847	0.385184	Tmem147	5.32605	1.57779e-06	0.52956	Srsf6	1.09948	0.999953	0.322558
Pyurf	1.3766	0.999927	0.116718	Ppm1a	1.44952	0.765928	0.102104	Esyt1	5.31801	1.64749e-06	0.801612	Pogz	1.09843	0.999953	0.859402
Pgpep1	1.37658	0.999927	0.191845	Paqr3	1.44889	0.766593	1.40643	Gfer	5.30717	1.74326e-06	0.744995	Ndufaf7	1.09766	0.999953	0.965565
B3galnt2	1.37044	0.999927	0.278608	Epb41l4aos	1.44704	0.76858	0.0650461	Bax	5.30664	1.74667e-06	0.524073	Elf1	1.09726	0.999953	0.308379
Sirt5	1.37013	0.999927	0.222455	Zswim8	1.44588	0.769273	0.330704	Gemin6	5.29294	1.87896e-06	1.0779	Ick	1.09702	0.999953	0.809764
Ubl7	1.3701	0.999927	0.0544301	Gm20604	1.44475	0.769602	0.382904	Tmem97	5.28811	1.92739e-06	1.06872	Clock	1.09702	0.999953	0.973799
Mterf1a	1.37008	0.999927	0.620919	Usp36	1.44474	0.769602	0.236621	Cisd2	5.28771	1.92969e-06	0.483843	Keap1	1.09445	0.999953	0.484662
Igf1r	1.36924	0.999927	0.0574503	Hist1h2ap	1.4442	0.769733	0.42648	Polr2m	5.28602	1.94566e-06	0.420342	Mapk14	1.09421	0.999953	0.406528
Tefm	1.36811	0.999927	0.346967	Laptm4b	1.44417	0.769733	0.230034	Inip	5.28223	1.98245e-06	0.934036	Sp140	1.09398	0.999953	0.563432
Rac1	1.36724	0.999927	0.0409315	Erc1	1.44249	0.770856	0.345633	Pak1ip1	5.28036	2.00085e-06	0.528841	Exosc9	1.09334	0.999953	0.811715
Dstyk	1.36692	0.999927	0.264926	Cd82	1.44191	0.771417	0.135643	Atp2a2	5.27715	2.03218e-06	0.67932	Gyg	1.09304	0.999953	0.496095
Cldn5	1.36691	0.999927	1.0067	Nrk	1.44102	0.771883	0.349495	Lair1	5.27476	2.05688e-06	1.02687	Phf5a	1.09182	0.999953	0.449461
Tgm2	1.36604	0.999927	0.0832824	Rbm18	1.44092	0.771883	0.15813	Cmtm7	5.27363	2.06745e-06	0.346223	Arhgap25	1.0903	0.999953	0.70188
Rnf181	1.36551	0.999927	0.180806	4732440D04Rik	1.43513	0.778068	0.360858	Cct5	5.26878	2.12075e-06	0.316816	Etfb	1.08866	0.999953	0.366515
Faap24	1.36398	0.999927	0.43028	Prpf8	1.43326	0.779594	0.0962064	Vdac2	5.2659	2.14856e-06	0.37537	Glipr2	1.08667	0.999953	0.683253
Ate1	1.36326	0.999927	0.197361	Ube2e3	1.43322	0.779594	0.0628769	Srsf4	5.26585	2.14856e-06	0.591481	Sgk3	1.08661	0.999953	0.682708
S100a1	1.36309	0.999927	0.0760416	Tnfrsf12a	1.43277	0.779749	0.898902	Atad3a	5.25841	2.23519e-06	0.638021	Camk2g	1.08655	0.999953	0.600192
Snx20	1.36201	0.999927	0.192581	Hdac5	1.4318	0.780165	0.246585	Nme6	5.2568	2.25266e-06	0.933539	Ttc9c	1.08538	0.999953	0.727908
Snx2	1.36163	0.999927	0.0949752	Atl2	1.43179	0.780165	0.385358	Lage3	5.2533	2.29144e-06	0.498895	Emc7	1.08521	0.999953	0.402076
Rint1	1.3614	0.999927	0.166232	Rsbn1l	1.4281	0.783688	0.0742483	Tomm70a	5.25271	2.29648e-06	0.602656	Zer1	1.0838	0.999953	0.704073
Zfp329	1.36058	0.999927	0.232838	Tnrc6c	1.42782	0.783688	0.0923899	Msantd3	5.24723	2.36352e-06	1.04303	Chchd7	1.0838	0.999953	0.340744
Capza1	1.35913	0.999927	0.147664	Ifi203	1.42663	0.783939	0.047786	Cfap20	5.23833	2.4756e-06	0.563918	Tbrg4	1.08369	0.999953	1.5104
Gusb	1.35805	0.999927	0.140215	Cep57	1.41719	0.794578	0.133542	Pin1	5.23724	2.48785e-06	0.588689	Rangap1	1.08328	0.999953	0.677135
Arid3a	1.35663	0.999927	0.356557	Zrsr1	1.40743	0.803198	0.237819	Usp14	5.2369	2.48999e-06	0.568128	Mre11a	1.08263	0.999953	0.873312
Timm29	1.35556	0.999927	0.324579	Zfp330	1.40728	0.803198	0.0952714	Dynll2	5.23637	2.49483e-06	0.54055	Lsg1	1.08111	0.999953	0.558623
Snrnp70	1.35507	0.999927	0.0247486	Rnf103	1.40562	0.804844	0.300838	Xpo1	5.23541	2.5053e-06	0.845705	Pdha1	1.07989	0.999953	0.408816
Pqlc3	1.35498	0.999927	0.241643	Gm42372	1.40558	0.804844	0.491028	Kras	5.23125	2.55988e-06	0.738673	Rgp1	1.07948	0.999953	1.15738
Ptger3	1.35367	0.999927	0.272136	H2-D1	1.40084	0.809229	0.0288204	Nop16	5.23021	2.57189e-06	0.589334	Mgea5	1.07912	0.999953	0.569515
Baz2b	1.35351	0.999927	0.0869618	Mknk1	1.40007	0.810138	0.276476	Polr2h	5.22717	2.612e-06	0.510067	Chst15	1.07854	0.999953	1.14404
Mndal	1.35259	0.999927	0.0453895	mt-Nd1	1.39917	0.810708	0.0314032	Ctdspl2	5.22295	2.6697e-06	0.670865	Map3k14	1.07819	0.999953	1.01389
Akirin2	1.3509	0.999927	0.0766165	Tpcn1	1.39811	0.812053	0.431663	Pop7	5.2222	2.678e-06	0.630655	Zfp280d	1.07743	0.999953	0.571732
Tspan13	1.35047	0.999927	0.0481039	Ddah2	1.39736	0.812855	0.126173	Sdhb	5.21712	2.7472e-06	0.492698	Ptp4a1	1.07649	0.999953	0.402331
Mrps14	1.34867	0.999927	0.0356732	Ldhb	1.39528	0.815006	0.0382296	Mphosph10	5.21595	2.7619e-06	0.576234	Mtif3	1.07486	0.999953	1.18867
Ccdc134	1.34867	0.999927	0.671714	Tifa	1.39512	0.815006	0.146582	Dnajc8	5.21503	2.773e-06	0.460541	Nfix	1.07468	0.999953	0.282648
Tmed3	1.34762	0.999927	0.0468791	Gata2	1.39135	0.819142	0.0637515	Carnmt1	5.21036	2.84094e-06	0.627505	Fbxo21	1.07386	0.999953	0.776555
Ankrd54	1.3465	0.999927	0.188462	Nr4a3	1.39034	0.819895	2.146	Lars	5.1996	3.00181e-06	0.628703	Irf2bp1	1.07345	0.999953	0.566434
Dmtf1	1.34587	0.999927	0.261472	Dhx40	1.38937	0.82058	0.685275	Bcap29	5.19782	3.02781e-06	0.524076	Sart3	1.07298	0.999953	0.871677
Ythdf2	1.34565	0.999927	0.0876357	Ccndbp1	1.38865	0.820979	0.112993	mt-Nd3	5.19646	3.04724e-06	0.253877	Tomm34	1.06965	0.999953	0.42372
Zfp260	1.3453	0.999927	0.22994	Gng2	1.38592	0.822494	0.140492	Pus7	5.1946	3.07489e-06	0.828883	Mccc1	1.06953	0.999953	1.12564
Zbtb4	1.34484	0.999927	0.254343	H2-M3	1.38302	0.825024	0.099201	Syncrip	5.19085	3.13442e-06	0.52179	Gmds	1.06649	0.999953	0.512523
Irf3	1.3444	0.999927	0.148606	Ogfr	1.38023	0.827192	0.0966013	Lmnb2	5.18659	3.20402e-06	1.33128	Uri1	1.06637	0.999953	0.392933
Usp8	1.34345	0.999927	0.152934	Casp6	1.3756	0.832433	0.173226	Acap1	5.18597	3.21155e-06	0.562487	Tln1	1.06626	0.999953	0.276412
Mrps18a	1.3424	0.999927	0.0973954	Mapk8	1.37476	0.833181	0.251772	Taldo1	5.18235	3.27147e-06	0.4609	Washc3	1.06573	0.999953	0.485027
Pde4d	1.34156	0.999927	0.248462	Bloc1s2	1.37429	0.833353	0.135302	Cdc34	5.17905	3.32672e-06	0.915693	Psen2	1.06421	0.999953	0.598123
Crebbp	1.33863	0.999927	0.100225	Gga1	1.37414	0.833353	0.147439	Flna	5.1777	3.34772e-06	0.703154	Lipt1	1.06357	0.999953	1.67667
Ttc33	1.33756	0.999927	0.174732	Tinagl1	1.37321	0.833598	0.105428	Abce1	5.17666	3.36263e-06	0.580179	Lancl2	1.06333	0.999953	0.934925
Rrp15	1.33603	0.999927	0.0950596	Zc3hav1	1.37065	0.835769	0.140939	Sssca1	5.17533	3.3808e-06	0.562372	Stub1	1.06304	0.999953	0.37144
Wdr43	1.33126	0.999927	0.0883764	Gdap10	1.36666	0.840253	0.353982	Ncln	5.16064	3.65029e-06	0.921197	Mapre2	1.06275	0.999953	0.517411
Eif3m	1.33058	0.999927	0.0196025	Ralgapa1	1.36488	0.841542	0.209385	Kars	5.15837	3.69138e-06	0.643202	Il1rap	1.06263	0.999953	1.66317
Rassf5	1.32988	0.999927	0.108884	Rock1	1.3645	0.841796	0.0669923	Sf3a2	5.15584	3.73461e-06	0.635174	Tsen15	1.0617	0.999953	0.430818
Acot8	1.32831	0.999927	0.260692	Scyl2	1.36424	0.841796	0.359404	Atp23	5.14508	3.94631e-06	0.724961	Rab38	1.05977	0.999953	0.254373
Ndufb5	1.3265	0.999927	0.0441795	Ocel1	1.3637	0.841796	0.241155	Pcgf6	5.14345	3.97095e-06	1.15374	2810474O19Rik	1.05965	0.999953	0.478817
1110032A03Rik	1.32461	0.999927	0.129294	Zmat5	1.36318	0.841806	0.13628	Tcof1	5.14258	3.98577e-06	0.572053	Chac2	1.05947	0.999953	1.67374
Pura	1.32402	0.999927	0.0263129	Esco1	1.36129	0.84336	0.154185	2410015M20Rik	5.14144	4.00621e-06	0.388703	Hnrnpa3	1.05854	0.999953	0.333638
Ppp5c	1.32303	0.999927	0.089033	Mprip	1.36082	0.84336	0.0918938	Ubxn1	5.13282	4.18653e-06	0.375939	Eif1ax	1.05836	0.999953	0.366187
Gm44777	1.31988	0.999927	1.18938	Maf1	1.35658	0.846235	0.0802625	Ndufb6	5.1322	4.19631e-06	0.552563	Ncoa1	1.05544	0.999953	0.7214
4632415L05Rik	1.31984	0.999927	0.378411	Zfp467	1.35403	0.849117	0.0929176	Etaa1	5.13165	4.20474e-06	1.00195	Ncoa6	1.05491	0.999953	0.982616
Fbxl15	1.31947	0.999927	0.280278	Sgms1	1.35234	0.850421	0.0666447	Brix1	5.12901	4.26018e-06	0.572317	Isy1	1.05357	0.999953	0.575957
Net1	1.31693	0.999927	0.177721	Crbn	1.35157	0.85136	0.196691	Gpx1	5.12218	4.41338e-06	0.279647	Ywhae	1.0531	0.999953	0.255181
P2rx1	1.3147	0.999927	0.270027	Ptpn6	1.35056	0.852401	0.0521606	Ccdc167	5.11702	4.53154e-06	1.0937	Gm16740	1.05304	0.999953	1.60151
Retreg2	1.31263	0.999927	0.101915	Ptpn4	1.34612	0.858225	0.351427	Fam120a	5.10996	4.69552e-06	0.579722	Trappc6a	1.05269	0.999953	0.353619
Rhog	1.31083	0.999927	0.160399	Dnttip1	1.34467	0.859772	0.0983767	Phb	5.10958	4.70072e-06	0.568323	Shmt2	1.05181	0.999953	0.734022
Efcab14	1.31079	0.999927	0.0739	Brap	1.34332	0.861266	0.254788	Prpf31	5.10879	4.71588e-06	0.548156	Pde4b	1.05158	0.999953	0.621573
Socs2	1.31027	0.999927	0.116536	H2-K1	1.34235	0.862432	0.0205903	Tmsb10	5.1076	4.74148e-06	0.3728	Taf1	1.05117	0.999953	0.535759
Sec62	1.30928	0.999927	0.0361977	Smim24	1.34206	0.862432	0.145539	Atp5d	5.1074	4.74211e-06	0.287299	Tmem176a	1.05088	0.999953	0.181376
Klhl7	1.30922	0.999927	0.230436	Ick	1.34125	0.863173	0.220787	Mad2l1	5.10087	4.90402e-06	1.57427	Tcf4	1.05053	0.999953	0.384196
Tmem165	1.30837	0.999927	0.124829	Anxa1	1.33757	0.866865	0.0867213	Larp7	5.09676	5.00714e-06	0.549132	Acot9	1.04936	0.999953	0.63595
Ctnnal1	1.30793	0.999927	0.219753	Supt7l	1.33709	0.866865	0.293448	Hsph1	5.09519	5.04406e-06	0.970759	Abt1	1.04819	0.999953	0.510693
Zfr	1.30771	0.999927	0.0848148	Fam131a	1.337	0.866865	0.472724	Khsrp	5.08885	5.21083e-06	0.706215	Gna13	1.04807	0.999953	0.742125
Mrpl41	1.30474	0.999927	0.140945	Sclt1	1.33686	0.866865	0.204141	Smc4	5.08859	5.21322e-06	0.565352	Zmiz2	1.04731	0.999953	0.712007
Dnajb14	1.30323	0.999927	0.198571	Smarca2	1.33519	0.868424	0.0623948	Snx3	5.08747	5.2393e-06	0.361894	Nin	1.04719	0.999953	1.0094
Gfi1	1.30316	0.999927	0.396502	Ppp3ca	1.32912	0.87477	0.061214	Dis3	5.08617	5.27063e-06	1.06956	Triobp	1.0469	0.999953	0.536915
Fbxo46	1.30306	0.999927	0.445609	Exoc7	1.32686	0.876446	0.162309	Dnajc15	5.08434	5.31674e-06	0.590558	Psmd4	1.04649	0.999953	0.333546
Pcyt2	1.3028	0.999927	0.167337	Gdf15	1.32577	0.877131	1.45892	Coq2	5.08271	5.35271e-06	0.567499	Rpl9-ps6	1.04637	0.999953	0.541679
Pias4	1.30195	0.999927	0.269801	Ctss	1.32415	0.878353	0.341916	Mgat2	5.08212	5.36472e-06	0.551402	Fam69a	1.04216	0.999953	0.714912
Dnm2	1.30057	0.999927	0.154118	Efnb2	1.32175	0.880901	0.983401	Ddb1	5.08067	5.40071e-06	0.541185	Smu1	1.04146	0.999953	0.477071
Armt1	1.30025	0.999927	0.281188	Tuba1a	1.32039	0.882423	0.311125	Cenpw	5.07952	5.42859e-06	1.14736	Gng12	1.04123	0.999953	0.677412
Rab37	1.29942	0.999927	0.077305	Exd2	1.31942	0.883168	0.422505	Sdhd	5.07886	5.44066e-06	0.502451	Lrrc8d	1.03865	0.999953	0.692908
Mrps33	1.29844	0.999927	0.0433475	Mphosph6	1.31738	0.88461	0.173831	Tbcb	5.07875	5.44066e-06	0.536649	Papd4	1.03778	0.999953	0.761181
Zfp719	1.29805	0.999927	0.584937	Ppp1r12c	1.31643	0.885537	0.123255	Ankrd10	5.07723	5.47937e-06	0.50865	Mbp	1.03754	0.999953	0.48181
Cavin2	1.29696	0.999927	0.221272	Hhex	1.31526	0.886427	0.0536945	Rbm10	5.07631	5.50099e-06	0.662411	Frs2	1.03754	0.999953	1.09414
D130040H23Rik	1.29326	0.999927	0.53954	Hnrnpl	1.31517	0.886427	0.0751469	Adrm1	5.07366	5.5733e-06	0.564588	Suco	1.03737	0.999953	0.652969
Ppil4	1.29312	0.999927	0.111328	Rnf7	1.31481	0.886427	0.0518147	Cdc123	5.07198	5.61745e-06	0.578691	Arf3	1.03707	0.999953	0.42352
Dbnl	1.29305	0.999927	0.0519211	Mink1	1.31204	0.88957	0.202534	Cep192	5.05975	5.98468e-06	0.661677	Jpx	1.03684	0.999953	1.02734
Arrdc2	1.29259	0.999927	0.612808	Rora	1.31176	0.88957	0.17048	Stag1	5.05077	6.26734e-06	0.566237	Spata1	1.03596	0.999953	1.60555
Fez2	1.29253	0.999927	0.225465	Rab21	1.31168	0.88957	0.0908552	Ndufa11	5.04652	6.39105e-06	0.47822	Nol8	1.03567	0.999953	0.468255
Ldlrad3	1.29244	0.999927	0.385875	Ier5l	1.31013	0.890707	1.55529	Naa40	5.04489	6.43987e-06	1.0197	Psmd13	1.03427	0.999953	0.4067
Tfdp2	1.29028	0.999927	0.100736	Mfge8	1.30967	0.890908	0.12047	Tmed2	5.04156	6.54711e-06	0.332593	Nrip1	1.03333	0.999953	0.332651
Ergic3	1.2855	0.999927	0.0507979	Phkg2	1.30859	0.892326	0.167862	Haus5	5.03841	6.64967e-06	1.55687	Morn2	1.0331	0.999953	0.750748
Cdkn1b	1.28549	0.999927	0.14934	Cmip	1.30771	0.892957	0.197395	Mrps18c	5.03803	6.65703e-06	0.557602	Prpf8	1.03292	0.999953	0.437618
Nfic	1.28443	0.999927	0.0498458	Rnf19b	1.30566	0.894888	0.326597	Hmga1	5.03467	6.76884e-06	0.727919	Ube2k	1.03275	0.999953	0.41284
Ubac2	1.28367	0.999927	0.103918	Zfp68	1.30215	0.898714	0.12313	Gdf3	5.02983	6.93556e-06	0.948533	Txndc9	1.03146	0.999953	0.443786
Nsun6	1.2834	0.999927	0.421392	Rassf1	1.30209	0.898714	0.140511	Mycbp	5.02824	6.98727e-06	1.01711	Snx19	1.02853	0.999953	1.60402
Senp7	1.28321	0.999927	0.156569	Cd84	1.30205	0.898714	0.0863454	St13	5.02412	7.13231e-06	0.426287	Fbxl3	1.02795	0.999953	0.638548
Prcp	1.2831	0.999927	0.0942078	Pqlc3	1.3008	0.899932	0.142945	Rcc1	5.02214	7.19982e-06	1.31391	Parp3	1.02748	0.999953	0.922334
Etfrf1	1.28304	0.999927	0.21396	Birc3	1.30065	0.899932	0.320857	Trnau1ap	5.01978	7.27356e-06	0.511423	Me1	1.02614	0.999953	2.49927
Rab5b	1.28023	0.999927	0.181538	Acad9	1.29664	0.903408	0.285532	Tmco1	5.01967	7.27356e-06	0.446096	Rab1a	1.02333	0.999953	0.42337
Tmem158	1.2767	0.999927	0.187614	Ikzf5	1.29438	0.904904	0.317625	Fancl	5.01537	7.43144e-06	0.997587	Pum3	1.02222	0.999953	0.471021
Trpc4ap	1.2756	0.999927	0.0915815	Prkch	1.2929	0.905664	0.120571	Cox6b2	5.01439	7.46286e-06	0.737652	Slc31a2	1.02198	0.999953	1.181
Zfand5	1.27527	0.999927	0.0469373	Ccl27a	1.2923	0.905835	0.207872	Gemin2	5.01146	7.57075e-06	0.895532	Actr10	1.02193	0.999953	0.447217
B230354K17Rik	1.27502	0.999927	0.360879	Kxd1	1.29134	0.90657	0.068283	Ndufc2	5.00982	7.62886e-06	0.359004	Dock2	1.02035	0.999953	0.288435
Brat1	1.27465	0.999927	0.595626	Pafah1b3	1.28998	0.90716	0.0811276	Hsd17b12	5.00821	7.67937e-06	0.478579	Rft1	1.01924	0.999953	0.90875
Capzb	1.27215	0.999927	0.0282466	Zfp445	1.28888	0.908257	0.139996	Map4k1	5.00659	7.73706e-06	0.811886	CAAA01118383.1	1.01795	0.999953	0.723592
Hmg20a	1.27208	0.999927	0.142751	Pura	1.28668	0.91058	0.054088	Drg1	5.00532	7.78152e-06	0.531085	Fbxo11	1.01789	0.999953	0.642521
Idh3b	1.27084	0.999927	0.0461536	Bag6	1.27974	0.915937	0.129475	Bcl7c	4.99901	8.03334e-06	0.383303	Csrp1	1.01596	0.999953	0.370359
AL590144.2	1.2703	0.999927	0.248959	Gm26853	1.27949	0.915937	0.422787	Rpl36al	4.99739	8.09424e-06	0.420595	Ggnbp2	1.01596	0.999953	0.356716
Nadk2	1.2669	0.999927	0.113434	Cpeb2	1.27812	0.916364	0.784247	Actn4	4.99473	8.19917e-06	0.58492	Atg13	1.01578	0.999953	1.15858
Gm47283	1.2668	0.999927	0.0637264	4833418N02Rik	1.27663	0.918037	0.365198	Tpm3	4.99267	8.27969e-06	0.293453	1110038F14Rik	1.0135	0.999953	0.44117
Atf7ip	1.26661	0.999927	0.0942193	Snhg9	1.27658	0.918037	0.265067	Irak1	4.98946	8.41096e-06	0.503595	Rbm41	1.01304	0.999953	1.47095
Ndrg3	1.26591	0.999927	0.125583	Ptpre	1.27565	0.918789	0.0579656	Msh3	4.98584	8.56257e-06	0.875838	Mtcp1	1.0128	0.999953	1.47602
Smtnl1	1.26466	0.999927	0.245865	Alox5ap	1.27549	0.918789	0.0469838	Bcl7a	4.98352	8.6582e-06	0.822735	Hoxb2	1.01081	0.999953	0.694321
Ago1	1.26359	0.999927	0.175161	Fkbp1a	1.26777	0.924007	0.0509239	Xrcc6	4.98254	8.69464e-06	0.669816	Ap1g2	1.00958	0.999953	1.12264
Eif4e	1.26268	0.999927	0.0679418	Fnbp4	1.26718	0.924174	0.134917	Polr3h	4.98095	8.75899e-06	0.621026	Gimap8	1.00935	0.999953	0.521797
Marc2	1.26238	0.999927	0.0318923	Pex7	1.25804	0.932706	0.0924401	Pycr2	4.97603	8.96833e-06	0.547482	Cyb5r4	1.00912	0.999953	0.533329
Glul	1.26232	0.999927	0.0352252	Leprotl1	1.25635	0.934796	0.0850198	Nomo1	4.97296	9.1036e-06	0.67421	Ndufb8	1.00894	0.999953	0.174866
Farsa	1.26053	0.999927	0.0921949	Phf3	1.25415	0.937295	0.0648998	Vars	4.97238	9.12305e-06	0.482631	Crim1	1.00847	0.999953	0.953062
Eef2kmt	1.25966	0.999927	0.110034	Smad2	1.25149	0.940031	0.182346	Rgcc	4.96027	9.68523e-06	0.609955	Rpl22l1	1.00684	0.999953	0.165235
Gulp1	1.258	0.999927	0.429775	Dlk1	1.24875	0.942357	0.490838	Tusc3	4.9564	9.87135e-06	0.746709	Rad23b	1.00678	0.999953	0.350959
Ears2	1.25735	0.999927	0.444085	Trpc1	1.24685	0.943881	0.400719	Snrpg	4.95477	9.92834e-06	0.406877	Mgat2	1.00672	0.999953	0.409665
Map2k1	1.25731	0.999927	0.148382	Pex16	1.24654	0.944026	0.150315	Usmg5	4.95095	1.01166e-05	0.478684	Xlr4a	1.00643	0.999953	2.74276
Hps3	1.25643	0.999927	0.44926	Actr10	1.24642	0.944026	0.0757934	Spata24	4.94122	1.06257e-05	0.853644	Clasp1	1.00584	0.999953	0.818194
Hspb11	1.25537	0.999927	0.114938	Yy1	1.24527	0.94492	0.0710865	E2f3	4.93973	1.06978e-05	1.02956	Thoc2	1.0052	0.999953	0.362221
Mplkip	1.25507	0.999927	0.0789458	Maml3	1.24505	0.94492	0.296168	Adh5	4.93789	1.079e-05	0.432764	Ltbr	1.00514	0.999953	0.863464
Mvp	1.25431	0.999927	0.113974	Tmem5	1.24418	0.945817	0.0885885	Tpst1	4.93499	1.09421e-05	1.28635	Ndufa11	1.00496	0.999953	0.313015
Sltm	1.25257	0.999927	0.0548895	Sult1a1	1.24357	0.946272	0.102102	Cbx1	4.93453	1.09585e-05	0.450047	Phf20l1	1.0028	0.999953	0.405694
Rnf41	1.25206	0.999927	0.23067	Anxa6	1.2423	0.946932	0.126183	Pank2	4.9294	1.12403e-05	0.676798	Smco4	1.00175	0.999953	0.502196
Thumpd2	1.25069	0.999927	0.335878	Rtraf	1.24066	0.948685	0.0266321	Timm10	4.91823	1.18909e-05	0.551568	Gpatch11	1.00163	0.999953	0.776247
Pigh	1.2487	0.999927	0.293528	Dlst	1.24063	0.948685	0.121013	Mad2l2	4.90762	1.25413e-05	0.8983	Itm2a	1.00128	0.999953	0.80559
Wdr83	1.24846	0.999927	0.199284	Mbd1	1.24035	0.948729	0.197024	A630089N07Rik	4.90644	1.26062e-05	1.07209	Ap2m1	1.00105	0.999953	0.324512
Stoml1	1.24768	0.999927	0.306891	D5Ertd579e	1.23729	0.95134	0.218117	Exosc10	4.90607	1.2619e-05	0.623541	Arl8a	0.999818	0.999953	0.519558
Isoc1	1.24738	0.999927	0.108796	Diablo	1.23537	0.952493	0.0896458	Cdk6	4.90153	1.28922e-05	0.632385	Map2k5	0.999759	0.999953	0.578149
2010111I01Rik	1.24729	0.999927	0.29791	Mlf2	1.2331	0.954344	0.08223	Fasn	4.90102	1.29144e-05	0.845523	Sept2	0.999291	0.999953	1.54504
Kmt2e	1.24711	0.999927	0.0475777	C920006O11Rik	1.23235	0.95504	0.534022	Mrps21	4.89998	1.29721e-05	0.514006	Homer1	0.998765	0.999953	1.60067
Tnfrsf1a	1.24696	0.999927	0.0716029	Fbxl14	1.22983	0.956247	0.134051	Sf3b3	4.89928	1.30046e-05	0.46103	Csnk2a1	0.997654	0.999953	0.509178
Coa4	1.24672	0.999927	0.286118	Lpp	1.22891	0.956929	0.127333	Ctnnbip1	4.89915	1.30046e-05	1.0476	Fggy	0.997303	0.999953	0.742696
2010315B03Rik	1.24536	0.999927	0.347586	Ciart	1.22598	0.95868	1.12178	Cinp	4.89878	1.30179e-05	0.918232	Ogg1	0.996367	0.999953	1.15981
Csad	1.24403	0.999927	0.0676133	Pias2	1.22505	0.959042	0.337277	Cndp2	4.89778	1.30729e-05	0.976941	Cul5	0.994262	0.999953	0.439762
Snx3	1.24391	0.999927	0.0323815	Herc1	1.22284	0.960554	0.11809	Ddx46	4.89505	1.32445e-05	0.520398	Gm45351	0.993911	0.999953	2.31465
Zfp207	1.24345	0.999927	0.0679634	Plekhf2	1.22172	0.961745	0.186063	Cyb5b	4.89164	1.34644e-05	0.795185	BC051226	0.99356	0.999953	1.29286
Atp9b	1.24258	0.999927	0.315037	Fbxo21	1.22006	0.962179	0.219187	Psmb8	4.88842	1.36751e-05	0.267619	Dennd1a	0.990986	0.999953	0.574589
Prorsd1	1.24093	0.999927	0.105135	Zfp655	1.21963	0.962179	0.200387	Gm16286	4.88812	1.36837e-05	0.40375	Impa1	0.990986	0.999953	0.473088
Padi4	1.24092	0.999927	0.188578	Kdm5b	1.21942	0.962179	0.0904173	Dnajc3	4.88733	1.37275e-05	0.517164	Ears2	0.990694	0.999953	1.13177
Ehd3	1.24065	0.999927	0.2897	Ggps1	1.2193	0.962179	0.161318	Plekhj1	4.88327	1.40009e-05	0.432326	Brms1	0.989524	0.999953	0.637634
Rorc	1.23854	0.999927	0.533901	Ankrd11	1.21927	0.962179	0.0483791	Elovl1	4.87996	1.42262e-05	0.578805	Zfp958	0.989056	0.999953	1.2
Atg7	1.23795	0.999927	0.211722	Kiz	1.21849	0.963029	0.175053	Zc3h18	4.87979	1.42263e-05	0.585141	Nsf	0.988588	0.999953	0.643629
Cog4	1.2376	0.999927	0.271529	Fbxw4	1.21768	0.963995	0.366896	Parp2	4.87677	1.4426e-05	0.611357	Rhobtb1	0.988355	0.999953	1.27538
Adipor2	1.23649	0.999927	0.0692192	Yif1a	1.21751	0.964012	0.117367	Taf6	4.8767	1.4426e-05	0.996548	Hikeshi	0.988004	0.999953	0.455068
Plekha5	1.23634	0.999927	0.151672	Mxd1	1.21059	0.969431	0.263693	Pds5b	4.8684	1.50328e-05	0.622535	Zswim9	0.986483	0.999953	1.4116
Vezf1	1.23308	0.999927	0.0774127	Gngt2	1.20802	0.970648	0.17462	Bccip	4.86699	1.51277e-05	0.522822	Mvb12a	0.986308	0.999953	0.521772
Bcl9l	1.23306	0.999927	0.160062	Zfp503	1.20775	0.97083	1.33988	Tdp2	4.85746	1.58608e-05	0.572747	Grina	0.986191	0.999953	0.521315
Snapc3	1.23228	0.999927	0.219262	Chd3	1.20623	0.972274	0.14078	Elavl1	4.85333	1.61811e-05	0.455591	Gnptab	0.986015	0.999953	0.991837
Ocrl	1.23158	0.999927	0.110655	Wasf2	1.20382	0.974626	0.0624493	Nsmce1	4.84416	1.69032e-05	0.511343	2310035C23Rik	0.985957	0.999953	0.801129
Cct4	1.23092	0.999927	0.0268315	Lrrc58	1.20368	0.974626	0.114051	Arl2bp	4.84283	1.69743e-05	0.522118	Cadps2	0.984787	0.999953	0.976489
Safb	1.22936	0.999927	0.10593	Prkacb	1.20313	0.975007	0.0718512	Eif4ebp1	4.84283	1.69743e-05	0.457965	Edc4	0.984728	0.999953	0.844822
Acbd5	1.22931	0.999927	0.208793	Hist1h4i	1.19773	0.980335	0.331829	Golt1b	4.84231	1.6993e-05	1.1474	Btc	0.984553	0.999953	1.42382
Arfgap3	1.22893	0.999927	0.421772	Ppp2r5e	1.19668	0.981435	0.1564	Aaas	4.84227	1.6993e-05	1.40214	Rnf38	0.984378	0.999953	0.942532
Cnot6l	1.22844	0.999927	0.0608557	Cd164	1.19609	0.981878	0.122528	Aen	4.84189	1.70116e-05	0.698778	Fam120b	0.982857	0.999953	0.749256
Syt11	1.22835	0.999927	0.321646	Tet3	1.1941	0.983363	0.153714	Nelfcd	4.84137	1.7042e-05	0.771586	Epm2aip1	0.982681	0.999953	0.740896
Plpp2	1.22708	0.999927	0.168689	Lat	1.19302	0.984321	0.135489	Lsm12	4.83888	1.72421e-05	0.539419	Plaa	0.982272	0.999953	0.718753
Dlgap4	1.2269	0.999927	0.122696	Stard10	1.19155	0.985361	0.0591698	Mrpl49	4.83742	1.73545e-05	0.641875	Peli1	0.982155	0.999953	0.538768
C1d	1.22231	0.999927	0.043746	Pou2f2	1.19154	0.985361	0.0978313	Cox6a1	4.83431	1.76138e-05	0.460789	Entpd1	0.982038	0.999953	1.43309
Pomgnt2	1.2201	0.999927	0.311845	Itpkb	1.18619	0.989307	0.254091	Prkar2a	4.8276	1.82022e-05	1.34037	Fam122a	0.98157	0.999953	0.659385
Fam193b	1.21766	0.999927	0.291617	Sqor	1.18351	0.990473	0.164269	Poldip2	4.82415	1.8505e-05	0.560578	Lamtor1	0.981336	0.999953	0.346242
Zfp688	1.21757	0.999927	0.311129	Max	1.18299	0.990473	0.0827859	Sarnp	4.82085	1.87824e-05	0.495353	Rab28	0.979757	0.999953	0.588181
Sox18	1.21745	0.999927	0.491407	Tmem11	1.18044	0.992536	0.095232	Akr1b3	4.81529	1.92967e-05	0.399728	Atg16l1	0.977944	0.999953	0.758227
Apc	1.21595	0.999927	0.156377	Synj1	1.17927	0.994208	0.22926	Ppib	4.80815	1.99818e-05	0.269299	Aimp1	0.975254	0.999953	0.270674
Ntmt1	1.21568	0.999927	0.133613	Vbp1	1.17612	0.996853	0.0602092	Imp4	4.80768	2.00127e-05	0.51007	AI597479	0.97502	0.999953	1.39721
Tspan31	1.21524	0.999927	0.0967957	Stxbp4	1.17585	0.996853	0.14847	Xndc1	4.80643	2.01208e-05	1.34537	Fam168a	0.974844	0.999953	0.727828
Trim30a	1.21469	0.999927	0.0821444	Hif1an	1.17415	0.998249	0.209137	Ncbp2	4.80283	2.04698e-05	0.542429	Vps26a	0.972973	0.999953	0.599606
Suclg1	1.21424	0.999927	0.0406288	Sap18	1.17255	0.999858	0.082419	Rnf126	4.80258	2.0478e-05	0.608607	Ddx11	0.971745	0.999953	1.39799
Mrpl11	1.21075	0.999927	0.07759	Stk4	1.17085	1	0.06765	Eed	4.80152	2.05695e-05	0.600912	Dus1l	0.971394	0.999953	0.642145
Zbtb44	1.20922	0.999927	0.231639	4933434E20Rik	1.1684	1	0.0898658	Mrps12	4.79457	2.12784e-05	0.511392	Ripply3	0.970458	0.999953	1.40768
Slc35c1	1.20849	0.999927	0.255502	Hpcal1	1.16601	1	0.104261	Tap1	4.79322	2.13868e-05	0.460486	Rfx7	0.96999	0.999953	0.581995
Rock2	1.20821	0.999927	0.0370445	Lcor	1.16545	1	0.280135	Coro2a	4.79196	2.14859e-05	0.507595	Slc35a3	0.969873	0.999953	1.39064
A930024E05Rik	1.20809	0.999927	0.86375	Lats1	1.16381	1	0.280697	1700025G04Rik	4.79121	2.15489e-05	0.89714	Akap9	0.969522	0.999953	0.284785
Armcx1	1.20712	0.999927	0.183881	Tet2	1.16281	1	0.251774	Cd3eap	4.78566	2.21338e-05	0.636059	Zc3hc1	0.969405	0.999953	0.645941
Rpl13a	1.20709	0.999927	0.00956219	Egr3	1.16253	1	1.2937	Abhd17a	4.78508	2.21799e-05	0.476474	Mtdh	0.969347	0.999953	0.146756
Mrpl45	1.20652	0.999927	0.129813	Coro1b	1.16103	1	0.0683618	Hars	4.78456	2.22193e-05	0.58892	Cacnb2	0.967943	0.999953	0.744514
Pmpcb	1.20602	0.999927	0.0944423	Xdh	1.16009	1	0.520277	Ndufv1	4.78141	2.25515e-05	0.496928	Gm32856	0.967768	0.999953	1.38837
Arl8a	1.20596	0.999927	0.135139	Smchd1	1.15801	1	0.0839146	Bag2	4.77971	2.27248e-05	0.689275	Txndc17	0.967592	0.999953	0.302729
AC061963.1	1.20566	0.999927	0.698864	Amz2	1.1577	1	0.106883	Atp1a1	4.77639	2.30835e-05	0.471735	Eif3j1	0.967534	0.999953	0.51585
Gm26802	1.20479	0.999927	0.644497	Flrt3	1.15581	1	1.14492	1110004E09Rik	4.77509	2.32027e-05	0.669217	Fbxl8	0.965369	0.999953	1.07249
Zdhhc21	1.20475	0.999927	0.249845	Vti1b	1.15518	1	0.0783579	Cep83	4.77503	2.32027e-05	0.656811	Stx3	0.964141	0.999953	1.68138
Prmt7	1.20377	0.999927	0.140083	Gm26632	1.15497	1	0.286128	Commd1	4.77409	2.32919e-05	0.501299	Bax	0.964141	0.999953	0.380278
Rab40c	1.20369	0.999927	0.324907	Spg21	1.15438	1	0.0668124	Gnl1	4.76787	2.40024e-05	0.686724	Cep78	0.962387	0.999953	1.40838
Smap2	1.20334	0.999927	0.0866745	Ivns1abp	1.15135	1	0.075416	Ctc1	4.76037	2.48922e-05	0.959482	Arhgap1	0.96227	0.999953	0.613663
Vps13a	1.20292	0.999927	0.130281	Crkl	1.15131	1	0.26149	Slc35a4	4.75828	2.51305e-05	0.577194	Ap1b1	0.962211	0.999953	0.72371
Fxyd5	1.20268	0.999927	0.0261175	Ssh1	1.1507	1	0.353161	Blm	4.75497	2.55256e-05	1.57029	Tmem110	0.960515	0.999953	1.06929
Zfp36l2	1.20041	0.999927	0.0136407	Mthfsl	1.14912	1	0.201895	Magohb	4.75385	2.56466e-05	0.666875	Hsh2d	0.960457	0.999953	1.1934
Rpain	1.20027	0.999927	0.199998	Cisd2	1.1435	1	0.0602129	Psmc2	4.75108	2.59711e-05	0.475629	Eif2s1	0.959462	0.999953	0.246665
Nucb1	1.19944	0.999927	0.0330048	Ramp1	1.14307	1	0.0624589	Rack1	4.75097	2.59711e-05	0.0828273	Rara	0.959462	0.999953	1.57561
Kctd10	1.19931	0.999927	0.186918	Smndc1	1.14212	1	0.118238	Ncbp1	4.74528	2.66909e-05	0.915615	Slc37a1	0.958761	0.999953	0.964053
Skap2	1.19912	0.999927	0.055174	Mzt1	1.14146	1	0.0512738	Serf1	4.73696	2.77197e-05	0.608504	Rnf123	0.957942	0.999953	1.50797
Selenos	1.19868	0.999927	0.0792297	Utrn	1.14137	1	0.0938419	Cmc2	4.73469	2.80093e-05	0.823078	Dbi	0.955778	0.999953	0.260727
Slc25a40	1.19595	0.999927	0.508238	Atp6ap1	1.14133	1	0.0905653	Sox12	4.72517	2.93298e-05	1.20806	B230118H07Rik	0.955719	0.999953	0.538529
Dnajc5	1.19564	0.999927	0.132279	Slc22a18	1.14013	1	0.309049	Nup107	4.72433	2.94281e-05	1.24866	Tpst1	0.955251	0.999953	1.12235
D3Ertd254e	1.19437	0.999927	0.410819	Lmbr1l	1.13779	1	0.472697	Rad54l	4.71691	3.0496e-05	2.52829	Pank3	0.953672	0.999953	1.06005
Spsb2	1.19097	0.999927	0.229266	Klhdc1	1.13653	1	0.262363	Hemgn	4.71386	3.0932e-05	1.20681	Acox3	0.953204	0.999953	0.962763
Aldoa	1.18938	0.999927	0.0403629	Polr3gl	1.13597	1	0.132163	Ndufa2	4.70988	3.1516e-05	0.376373	Prkca	0.953029	0.999953	0.814117
Rps2	1.18926	0.999927	0.00733845	Col4a1	1.13272	1	0.168317	Fundc2	4.70941	3.15642e-05	0.427563	Snx3	0.952561	0.999953	0.311801
Ubald2	1.18593	0.999927	0.0373648	Gm17056	1.13062	1	1.44218	Hacd1	4.70654	3.1986e-05	0.73612	H2-T24	0.951684	0.999953	2.08342
Ugcg	1.18537	0.999927	0.18819	Mvp	1.13009	1	0.106616	Ndufb2	4.70121	3.28055e-05	0.49765	Ghitm	0.951567	0.999953	0.354709
Mettl18	1.18532	0.999927	0.370525	Yipf6	1.12902	1	0.196677	Orc2	4.69966	3.30024e-05	0.97705	Pgm1	0.951157	0.999953	0.65824
Gm13830	1.18521	0.999927	1.2381	Hivep1	1.1282	1	0.236003	Cdkn2aipnl	4.69948	3.30056e-05	0.642218	Prkrip1	0.95104	0.999953	0.802965
Tbc1d10c	1.18439	0.999927	0.0748874	Hnrnph1	1.12574	1	0.0389141	Srrt	4.6965	3.34634e-05	0.498733	Laptm4b	0.950807	0.999953	0.83956
Cd82	1.18386	0.999927	0.158312	Afap1l1	1.12512	1	0.0740641	Rabl6	4.69492	3.36962e-05	0.539906	Rasa1	0.950222	0.999953	0.614634
Gtf3c5	1.18324	0.999927	0.573539	Kazald1	1.12272	1	0.149	Get4	4.69346	3.39103e-05	0.896388	Alcam	0.950163	0.999953	0.54778
Pomgnt1	1.18324	0.999927	0.256365	Rnf13	1.12254	1	0.123751	Hspa5	4.69304	3.39519e-05	0.37798	Gstcd	0.949812	0.999953	1.60063
Aamdc	1.18214	0.999927	0.121331	Atp6v1a	1.11819	1	0.118784	Exosc1	4.69159	3.41675e-05	0.572362	Elac1	0.94952	0.999953	1.17718
Coq3	1.1818	0.999927	0.48717	Usf2	1.11596	1	0.0792568	Prps2	4.68976	3.44464e-05	0.8696	Mrm2	0.948994	0.999953	1.05185
Ddx47	1.18156	0.999927	0.135047	Acyp1	1.11586	1	0.0478996	Csk	4.68753	3.47952e-05	0.450474	Arf4	0.948935	0.999953	0.183715
Tprkb	1.18109	0.999927	0.171189	Myo1f	1.11531	1	0.251145	Psmg1	4.68609	3.49854e-05	0.535447	Hps3	0.948643	0.999953	1.00479
Rbm4b	1.18085	0.999927	0.0835833	Mon2	1.11506	1	0.210993	Cfdp1	4.68357	3.53899e-05	0.46496	Arhgef12	0.948526	0.999953	0.470168
Ift52	1.18051	0.999927	0.140653	Taf1d	1.10649	1	0.0401508	Ccnh	4.67972	3.60041e-05	0.479616	Gpatch2	0.947999	0.999953	0.675077
Plin3	1.18039	0.999927	0.096116	Ep300	1.10638	1	0.118156	Apip	4.6767	3.65099e-05	0.649879	Itgb3bp	0.945075	0.999953	0.799981
Pnkd	1.17988	0.999927	0.0880144	Taok3	1.10635	1	0.0599829	Sec23b	4.67547	3.66708e-05	0.787764	Lrrk2	0.944666	0.999953	1.99475
Emc1	1.17984	0.999927	0.286029	Btf3	1.10471	1	0.00041375	Pum3	4.66701	3.8152e-05	0.575653	Abcg3	0.944139	0.999953	0.618875
Borcs6	1.17964	0.999927	0.178421	Ints12	1.10356	1	0.322339	Grpel1	4.6604	3.93368e-05	0.50411	Ldlrap1	0.943671	0.999953	0.721129
Kmt2a	1.17927	0.999927	0.0408574	Gucy1a1	1.10247	1	0.108912	Ssr1	4.65809	3.97164e-05	0.474534	Txnl4a	0.943671	0.999953	0.43711
Gpr107	1.17886	0.999927	0.284732	Tprgl	1.10227	1	0.0272927	Etf1	4.6545	4.03513e-05	0.564712	Cs	0.943379	0.999953	0.489498
4632404H12Rik	1.17857	0.999927	0.590741	Nub1	1.10193	1	0.0900009	Guk1	4.65327	4.05605e-05	0.490188	Bloc1s6	0.943145	0.999953	0.630713
Ndufc2	1.17821	0.999927	0.00920195	Naip5	1.10176	1	0.278198	Gmds	4.65246	4.06889e-05	0.606444	Paxbp1	0.942268	0.999953	0.636526
Mtfmt	1.17661	0.999927	0.473941	Fmr1	1.10074	1	0.129815	Dck	4.64747	4.16523e-05	1.55671	Dck	0.942151	0.999953	1.58149
Foxa3	1.1763	0.999927	0.312504	Tvp23b	1.10018	1	0.0943598	Cdc6	4.64633	4.18493e-05	2.06117	Mill2	0.941507	0.999953	1.0452
Usp15	1.17573	0.999927	0.0664055	Igf1	1.09927	1	0.36626	Aldh18a1	4.64617	4.18507e-05	0.925805	Ggps1	0.941332	0.999953	0.537181
Mdp1	1.17505	0.999927	0.137159	Thra	1.09884	1	0.0774958	Bcl2l12	4.64089	4.29009e-05	0.574025	Fam109b	0.941156	0.999953	1.16946
Glud1	1.17447	0.999927	0.0604644	Dand5	1.09729	1	0.344989	D030056L22Rik	4.63941	4.31741e-05	0.577387	Flywch2	0.940162	0.999953	0.47338
Pttg1	1.17287	0.999927	0.105078	Gsdmd	1.09634	1	0.12635	Psmd6	4.63768	4.35038e-05	0.471168	Raf1	0.938524	0.999953	0.463166
Atr	1.17215	0.999927	0.256685	Plpp5	1.0949	1	0.147676	Mrpl50	4.63631	4.37431e-05	0.538767	Fam3c	0.935249	0.999953	0.610086
Acer3	1.17089	0.999927	0.230071	Plekho1	1.09322	1	0.0831966	Rbm14	4.63622	4.37431e-05	0.902137	Nrf1	0.935249	0.999953	0.70295
Stim1	1.17009	0.999927	0.106965	Abhd10	1.09175	1	0.227784	Ndufa8	4.63382	4.42179e-05	0.386132	Uqcrh	0.934664	0.999953	0.17417
N4bp2	1.16965	0.999927	0.0806981	Maip1	1.09084	1	0.122834	Ssna1	4.62896	4.52342e-05	0.462017	Hps4	0.934664	0.999953	1.24147
Plscr4	1.16889	0.999927	0.203862	Polb	1.09057	1	0.176479	Ostc	4.62354	4.63964e-05	0.440698	Zdhhc5	0.934664	0.999953	1.10697
Isca2	1.16799	0.999927	0.101218	Atf1	1.08969	1	0.0934475	Kat2a	4.62291	4.65012e-05	0.698746	Ttc14	0.934431	0.999953	0.209416
Iqcc	1.16646	0.999927	0.299997	Ccdc12	1.08968	1	0.0306493	0610010K14Rik	4.61384	4.85409e-05	0.640631	AI987944	0.933612	0.999953	0.68728
Zfp292	1.16542	0.999927	0.0569819	Higd2a	1.08871	1	0.0468838	Eif5b	4.61233	4.88556e-05	0.428028	Ftl1-ps1	0.931155	0.999953	0.805968
Apbb1ip	1.16483	0.999927	0.0335016	Ppox	1.08781	1	0.243766	Mydgf	4.61108	4.91142e-05	0.497171	Zfp87	0.930746	0.999953	1.03156
Akr1b10	1.1646	0.999927	0.155585	Laptm5	1.08055	1	0.0321278	Noc4l	4.61051	4.92103e-05	0.716722	Mdc1	0.930687	0.999953	0.694655
Fbxo22	1.16441	0.999927	0.131722	Kmt2c	1.07844	1	0.104803	Cars2	4.60999	4.92957e-05	0.587342	Foxred1	0.929693	0.999953	1.20914
Mctp1	1.16363	0.999927	0.0943938	Dync1i2	1.07808	1	0.0653377	Ipo7	4.6046	5.055e-05	0.670844	Bop1	0.929401	0.999953	0.70635
Arl16	1.16328	0.999927	0.359405	Dctn2	1.07456	1	0.0427327	Mrpl34	4.60402	5.06525e-05	0.43486	Exosc4	0.928816	0.999953	0.441091
Mkl2	1.16115	0.999927	0.246226	Sars	1.07323	1	0.0635653	Slc19a1	4.59758	5.21602e-05	0.720792	Mcl1	0.928582	0.999953	0.241146
Mrgbp	1.15963	0.999927	0.208267	Mir17hg	1.07265	1	0.43193	Aifm1	4.58618	5.50055e-05	0.67415	Ndufs1	0.927178	0.999953	0.4563
Snapc1	1.15954	0.999927	0.260859	Sh3bp1	1.07047	1	0.109736	Asf1b	4.58374	5.5572e-05	2.73872	Mcts1	0.927003	0.999953	0.352094
Nipsnap2	1.1591	0.999927	0.129339	Ssbp2	1.07031	1	0.0447069	Tsg101	4.58369	5.5572e-05	0.504288	Frmd8	0.92595	0.999953	0.450262
1810010H24Rik	1.15766	0.999927	0.449138	Fli1	1.06986	1	0.0546479	Psma3	4.58355	5.5572e-05	0.321092	Plec	0.925307	0.999953	0.384088
Rnf169	1.15677	0.999927	0.295988	Cep85l	1.06908	1	0.255434	Exosc3	4.57992	5.64604e-05	0.51534	Arhgap29	0.923669	0.999953	1.11573
Pex12	1.15537	0.999927	0.351844	Dctn6	1.06792	1	0.102316	Sac3d1	4.57683	5.7211e-05	0.803125	Zfp513	0.923669	0.999953	1.28178
Sdhaf2	1.15509	0.999927	0.146572	Taf1b	1.06542	1	0.162898	Morf4l2	4.57491	5.76535e-05	0.435085	Asna1	0.923318	0.999953	0.741687
Dido1	1.15276	0.999927	0.116614	Eif2a	1.06244	1	0.0434291	Dazap1	4.5749	5.76535e-05	0.468139	Eef2k	0.922675	0.999953	0.379492
Rhno1	1.15133	0.999927	0.19758	Pogz	1.06111	1	0.173744	Mri1	4.57313	5.8097e-05	0.502103	Ctf1	0.922324	0.999953	0.82212
Paxx	1.15117	0.999927	0.0998709	Xpr1	1.05868	1	0.13345	Cdc5l	4.57281	5.81418e-05	0.483532	Relb	0.92133	0.999953	1.30429
Tle2	1.15002	0.999927	0.2172	Csnk1g1	1.05733	1	0.144356	Scaf11	4.56544	6.01562e-05	0.429921	Xrcc5	0.920628	0.999953	0.602677
Nwd1	1.14934	0.999927	0.160867	Bmpr2	1.05681	1	0.165731	Ndufaf4	4.56535	6.01562e-05	0.610831	Ap3b1	0.918873	0.999953	0.430745
Ndrg2	1.14917	0.999927	0.190581	Mff	1.05525	1	0.0491479	Eif3j1	4.56084	6.14168e-05	0.483833	Crybg1	0.918873	0.999953	1.87717
Rpl4	1.14664	0.999927	0.0144754	Socs5	1.05382	1	0.236406	Rap1a	4.55748	6.236e-05	0.445375	Cep57l1	0.918522	0.999953	0.417345
Iqsec1	1.14197	0.999927	0.278488	Spata2	1.05348	1	0.500303	Sem1	4.55614	6.27097e-05	0.259184	Zfp65	0.918171	0.999953	1.04004
Tk2	1.14087	0.999927	0.227706	Klf16	1.05285	1	0.318268	Pinx1	4.55417	6.32185e-05	1.00223	Ppp1r13b	0.917937	0.999953	0.50393
Pex6	1.13911	0.999927	0.198136	Tiprl	1.04888	1	0.0634454	Smdt1	4.55398	6.32185e-05	0.403986	Zc3h13	0.917353	0.999953	0.402822
Cir1	1.13832	0.999927	0.0669793	Klhl4	1.0487	1	0.240464	Trip13	4.55396	6.32185e-05	1.9282	Psmb7	0.915656	0.999953	0.268849
Golim4	1.13824	0.999927	0.138059	Washc4	1.04818	1	0.145753	Ptp4a3	4.54974	6.44509e-05	0.398775	Pithd1	0.915481	0.999953	0.606199
Zfp764	1.13438	0.999927	0.614061	Uvrag	1.04742	1	0.141633	Larp1	4.54615	6.54604e-05	0.50626	Ifi206	0.914896	0.999953	6.31157
Actr3	1.13406	0.999927	0.0363181	Tmem192	1.04705	1	0.181873	2610507B11Rik	4.54087	6.70707e-05	0.588509	Tmem9b	0.914604	0.999953	0.866799
Txndc17	1.13253	0.999927	0.0372332	Sec23ip	1.04547	1	0.282311	Glod4	4.54019	6.72349e-05	0.455894	Txndc16	0.914428	0.999953	1.35487
Usp21	1.13184	0.999927	0.331082	Ttc32	1.04397	1	0.144209	Psmb9	4.53863	6.76846e-05	0.3711	Rad23a	0.914428	0.999953	0.526814
Mrps10	1.13146	0.999927	0.124059	Xab2	1.04273	1	0.11616	Lin9	4.53381	6.9196e-05	1.29015	Nfatc1	0.914019	0.999953	0.883738
Ankhd1	1.13141	0.999927	0.137858	Alg13	1.04047	1	0.460283	Eif4h	4.51961	7.39467e-05	0.345053	Dennd6b	0.91127	0.999953	1.87212
Ncam2	1.13139	0.999927	0.580344	Map4k5	1.03631	1	0.246631	Lrrc42	4.51916	7.40463e-05	0.721254	Nr1h2	0.91127	0.999953	0.369426
Tbc1d17	1.1306	0.999927	0.0937714	Arpc2	1.03596	1	0.0345042	Blmh	4.51308	7.61438e-05	0.499453	2310011J03Rik	0.911153	0.999953	0.349108
Atxn7l3b	1.12997	0.999927	0.00632876	Nfatc2	1.03592	1	0.275158	Thap12	4.51118	7.67723e-05	0.656426	Pigx	0.910568	0.999953	0.314216
Mfap3	1.12952	0.999927	0.259288	Gabre	1.03329	1	0.730098	Dgcr8	4.5108	7.68533e-05	0.992594	Zfp777	0.910334	0.999953	0.950591
Gm10419	1.12941	0.999927	0.279556	Tlnrd1	1.03241	1	0.319753	Prep	4.50779	7.78921e-05	0.877985	Atpaf2	0.910159	0.999953	0.928418
Zfp40	1.12937	0.999927	0.441099	Sfpq	1.03015	1	0.0270661	Nars	4.49582	8.23448e-05	0.487119	Pmepa1	0.909457	0.999953	0.956471
Acrbp	1.12926	0.999927	0.633934	Eid2	1.02963	1	0.0905976	Ccdc115	4.49365	8.31239e-05	0.480514	Tax1bp3	0.909398	0.999953	0.892387
Cbx1	1.12923	0.999927	0.0389429	Prr12	1.02855	1	0.177752	Chchd4	4.49047	8.43102e-05	0.522466	Narf	0.908931	0.999953	1.03249
Zfp60	1.12882	0.999927	0.445099	Kdm5c	1.0248	1	0.183882	Sh3glb2	4.48915	8.47705e-05	0.650288	Tmem42	0.908112	0.999953	0.571542
Armc8	1.12764	0.999927	0.262433	Shb	1.02477	1	0.313989	Pkmyt1	4.48763	8.53131e-05	2.60043	Impad1	0.907995	0.999953	0.576255
Kmt5b	1.12715	0.999927	0.144683	Cry2	1.02423	1	0.252999	Snrnp25	4.48687	8.55566e-05	0.597124	Nup35	0.907761	0.999953	0.93388
Abcd1	1.12568	0.999927	0.269371	Creb5	1.02257	1	0.449548	Srsf9	4.47891	8.86727e-05	0.424963	5430427O19Rik	0.907702	0.999953	2.02705
Mpg	1.12363	0.999927	0.146365	Zfp410	1.02233	1	0.158378	1110008F13Rik	4.47654	8.9532e-05	0.353625	Tomm6	0.906708	0.999953	1.00509
Atg12	1.12354	0.999927	0.174563	Uba1	1.02134	1	0.0519523	Hypk	4.47586	8.97483e-05	0.541372	Dclre1c	0.906591	0.999953	1.32207
Pex11b	1.12309	0.999927	0.208396	Thap1	1.02076	1	0.321717	Muc13	4.46863	9.2766e-05	0.450372	Pikfyve	0.906065	0.999953	0.962877
Akirin1	1.12224	0.999927	0.192434	Gde1	1.02062	1	0.0924002	Wdr4	4.46594	9.37975e-05	0.922629	Slc25a22	0.905304	0.999953	1.29868
Ctnnd1	1.12201	0.999927	0.234242	H2-Eb1	1.02055	1	0.165896	Psmd3	4.46538	9.39766e-05	0.476031	Zbtb21	0.902731	0.999953	0.94214
N6amt1	1.12197	0.999927	0.125471	Nrros	1.02043	1	0.0630743	Litaf	4.46446	9.43114e-05	0.919129	Toe1	0.902614	0.999953	0.580113
Sp140	1.12077	0.999927	0.0953699	Cfap20	1.01944	1	0.0954952	Trap1	4.46263	9.50484e-05	0.495356	Atxn7	0.901561	0.999953	0.42978
Padi1	1.11997	0.999927	0.652972	Ccdc186	1.01817	1	0.191874	Mrpl54	4.46243	9.50662e-05	0.457012	Cd84	0.901444	0.999953	0.472542
Znrd1	1.11927	0.999927	0.0457186	Cand2	1.01739	1	0.190634	Gtf2f1	4.45805	9.68106e-05	0.598516	Zcchc11	0.90121	0.999953	0.38222
Polr1c	1.11912	0.999927	0.138518	Ptpra	1.01564	1	0.0473103	Naa38	4.45549	9.7902e-05	0.476486	Gvin1	0.900918	0.999953	1.94839
Lsm10	1.11906	0.999927	0.133792	Rnf111	1.01221	1	0.124794	Gpatch4	4.44653	0.000101849	0.518875	Mapk9	0.900567	0.999953	0.766188
4930532G15Rik	1.11521	0.999927	0.816581	Bend5	1.01192	1	0.246655	Gnpnat1	4.44495	0.000102327	0.576749	Snapc1	0.900392	0.999953	0.853823
Clstn3	1.11463	0.999927	0.282642	Nufip1	1.01044	1	0.13265	Abcf1	4.44488	0.000102327	0.445346	Eps15	0.900333	0.999953	0.617914
Rrm2b	1.11415	0.999927	0.24936	Rfx7	1.00993	1	0.0715092	Matk	4.43626	0.000106434	0.46265	Trim26	0.899748	0.999953	0.640988
Ift122	1.11406	0.999927	0.712422	Prmt2	1.00696	1	0.195914	Mrps14	4.42935	0.00010982	0.379543	Zfp281	0.899631	0.999953	0.933057
Mrpl49	1.11402	0.999927	0.167092	Mid1	1.00695	1	0.429847	Fam173a	4.42487	0.000112042	0.476542	Wfdc17	0.899222	0.999953	1.95877
Tmbim4	1.11401	0.999927	0.0327622	Hagh	1.00617	1	0.160118	Setd6	4.42235	0.000113273	1.13015	Sik1	0.89852	0.999953	0.327548
Mindy2	1.1137	0.999927	0.146803	Ftl1-ps1	1.00488	1	0.159137	Ankrd26	4.42102	0.000113891	0.934828	Cgrrf1	0.897818	0.999953	0.770129
Pgrmc1	1.11335	0.999927	0.0391969	Tnfrsf10b	1.00309	1	1.0272	Tars	4.41897	0.000114888	0.649915	Ets2	0.897526	0.999953	1.03554
Lysmd1	1.11232	0.999927	0.294181	Appl1	1.00146	1	0.134034	Paxip1	4.41828	0.000115171	1.09854	Cox7c	0.897526	0.999953	0.117458
Ebi3	1.11171	0.999927	0.0727008	Fxr1	1.00055	1	0.0594881	Ipo9	4.41633	0.000116129	0.990876	Alg9	0.897058	0.999953	1.21663
Ldah	1.11039	0.999927	0.131925	Med10	1.00048	1	0.0907162	Nifk	4.40237	0.000123774	0.441682	Rbmx	0.896941	0.999953	0.422189
Zfp740	1.11028	0.999927	0.184488	Tomm6	1.00036	1	0.273359	Gsto1	4.40098	0.000124474	0.430498	Atp5j2	0.896181	0.999953	0.23503
Qars	1.11009	0.999927	0.100981	Plpp3	0.999481	1	0.297698	Memo1	4.40045	0.000124691	0.774804	Tmem214	0.896122	0.999953	0.680245
Tmem201	1.11005	0.999927	0.19806	Tle1	0.999472	1	0.280724	Rad23b	4.39842	0.000125769	0.454525	Ireb2	0.895947	0.999953	0.676274
Dync1li2	1.10996	0.999927	0.178468	Gm5148	0.999147	1	0.244216	Tial1	4.39538	0.000127448	0.49711	Psd4	0.89583	0.999953	0.849862
Lamtor4	1.10964	0.999927	0.043306	Gm5914	0.997837	1	0.189316	Brd3	4.39464	0.000127788	0.485573	Sdad1	0.895011	0.999953	0.44767
Taf1a	1.10886	0.999927	0.521977	Psmc6	0.997033	1	0.0457054	Ints11	4.39012	0.000130288	0.722141	Sacs	0.894543	0.999953	1.46791
Icam2	1.10868	0.999927	0.126339	Snip1	0.995714	1	0.163192	Ints10	4.38358	0.000134067	0.631224	Mtmr3	0.894368	0.999953	0.619618
Ppp3ca	1.10863	0.999927	0.0543459	Ppp1r15b	0.995398	1	0.23216	Snx5	4.38295	0.000134357	0.448953	Suds3	0.893081	0.999953	0.467566
Aamp	1.10846	0.999927	0.0459956	Ubald2	0.995218	1	0.0512989	Eprs	4.36849	0.000143357	0.379505	Ubtd1	0.893022	0.999953	1.25974
Zfp35	1.10781	0.999927	0.476497	Nfyb	0.995001	1	0.15977	Mrpl19	4.36741	0.00014396	0.505241	Plin2	0.892788	0.999953	0.450965
Ctsd	1.10747	0.999927	0.026992	Kbtbd2	0.994847	1	0.22938	Sap18	4.36436	0.00014588	0.489007	Camk2d	0.892321	0.999953	0.395497
Rtp4	1.10739	0.999927	0.100986	Lrrfip2	0.994098	1	0.116212	Calm3	4.36367	0.000146235	0.395983	Ccl5	0.891619	0.999953	4.79247
Trub1	1.10684	0.999927	0.157932	Stx5a	0.991975	1	0.0823862	Naa15	4.36313	0.000146489	0.460811	Zfp324	0.891443	0.999953	1.76938
Jam3	1.10646	0.999927	0.136964	Pcyt1a	0.990547	1	0.126321	Snd1	4.35751	0.000150081	0.466046	Tmem242	0.890449	0.999953	0.673536
Eif2a	1.10641	0.999927	0.0485943	Nfe2l1	0.99006	1	0.130081	Gtpbp4	4.35477	0.000151866	0.413041	Eif3d	0.89039	0.999953	0.263117
Rsad1	1.10593	0.999927	0.282615	Smg6	0.989635	1	0.0709232	Emp3	4.352	0.000153514	0.254899	Gan	0.889455	0.999953	0.92449
Pnpla2	1.10321	0.999927	0.0899442	Rasgef1b	0.987747	1	0.472353	Nipsnap3b	4.35199	0.000153514	0.519935	Cd200r4	0.888343	0.999953	4.48704
Gimap3	1.10094	0.999927	0.414505	Gm29994	0.987494	1	1.2088	Ppp2r1a	4.35193	0.000153514	0.460974	Pfkfb3	0.887291	0.999953	1.34539
Ankra2	1.10051	0.999927	0.216723	Kansl1l	0.986771	1	0.134234	Polr2d	4.35087	0.000154078	0.528436	Pds5a	0.887232	0.999953	0.383792
Ube2e1	1.10008	0.999927	0.0333056	Crat	0.986175	1	0.407164	Ppid	4.35007	0.000154375	0.436581	1700029J07Rik	0.886238	0.999953	1.25333
Ddx55	1.09779	0.999927	0.181808	Fcho2	0.984576	1	0.0655141	Sf3a1	4.34904	0.000154921	0.525334	Ubl3	0.885946	0.999953	0.47933
Hoxa7	1.09734	0.999927	0.0906109	Inafm1	0.980719	1	0.0964364	Acly	4.34898	0.000154921	0.52372	Nynrin	0.884308	0.999953	0.747492
Nek4	1.09729	0.999927	0.405963	Ccni	0.980349	1	0.0658392	Naf1	4.34801	0.000155494	0.659421	Dvl2	0.884016	0.999953	0.72087
Mbnl1	1.09653	0.999927	0.0355712	Sin3b	0.979653	1	0.0348754	Aven	4.34729	0.000155894	0.52673	Sel1l	0.883489	0.999953	0.566984
Rictor	1.0963	0.999927	0.0949872	Zxdc	0.977612	1	0.193359	Atp5c1	4.33595	0.000164038	0.276077	Hcfc1	0.882904	0.999953	0.497506
Tmem186	1.0953	0.999927	0.31336	Lag3	0.977341	1	0.417864	Tmem167	4.33438	0.000165091	0.45767	St3gal3	0.879805	0.999953	1.86844
Tmem70	1.09366	0.999927	0.0932582	Vapa	0.976654	1	0.0261141	Utp14a	4.33048	0.000167921	0.510831	Nit2	0.879571	0.999953	0.410225
Mus81	1.09349	0.999927	0.417509	Tfrc	0.975218	1	0.473705	Letm1	4.33024	0.000167988	0.738353	Lpgat1	0.878869	0.999953	0.823079
Tbkbp1	1.0922	0.999927	0.16016	Rbm27	0.975073	1	0.148223	Prkcsh	4.31969	0.000175968	0.469739	Taf5l	0.877231	0.999953	0.577983
Phax	1.09184	0.999927	0.0597902	Cuedc1	0.971749	1	0.0727305	Prpf3	4.31473	0.000179835	0.87739	Dync1li1	0.877173	0.999953	0.719505
Bbs4	1.09183	0.999927	0.358449	Helz	0.970466	1	0.100105	1810022K09Rik	4.31331	0.000180872	0.426858	Mrpl23	0.876763	0.999953	0.20886
Gm28557	1.09105	0.999927	0.804802	Uba3	0.970186	1	0.208909	Tardbp	4.3089	0.000184249	0.439434	Wasf2	0.876237	0.999953	0.381329
Rbmx	1.09046	0.999927	0.110513	1810011H11Rik	0.969229	1	0.338236	H2afx	4.30528	0.000187157	0.487962	Rfx5	0.876061	0.999953	0.741992
Rex1bd	1.08823	0.999927	0.0607242	Tmem243	0.969183	1	0.191841	Ubap2l	4.30288	0.000189058	0.383617	Dusp10	0.876003	0.999953	1.6979
Rap2b	1.08808	0.999927	0.243453	Nemp1	0.968271	1	0.239705	Srrm1	4.3015	0.000190105	0.360538	Lpin2	0.873547	0.999953	0.403456
Erlec1	1.08713	0.999927	0.11955	Gprc5b	0.967187	1	0.224989	Coq7	4.29756	0.000193244	0.7423	Tmem104	0.872845	0.999953	1.65481
Sri	1.08669	0.999927	0.0203528	Grhpr	0.965678	1	0.151299	Pcbd2	4.29564	0.000194785	0.485908	Eml2	0.872494	0.999953	0.74656
Ccdc14	1.08654	0.999927	0.605448	Zfp146	0.965651	1	0.218104	Farsb	4.29394	0.000196148	0.541059	Brcc3	0.872435	0.999953	0.649295
Gstt1	1.08647	0.999927	0.227214	Palld	0.965209	1	0.187065	Cnih4	4.29011	0.000199413	0.444932	Ccdc122	0.871266	0.999953	0.84304
Prkrip1	1.08634	0.999927	0.301735	Med26	0.964884	1	0.26484	Upf1	4.28941	0.000199906	0.560846	Hoxb4	0.871032	0.999953	0.407541
Rab18	1.0861	0.999927	0.0594542	Dhx36	0.962399	1	0.065122	2310033P09Rik	4.2887	0.000200401	0.461679	Ibtk	0.870447	0.999953	0.553748
Obscn	1.08585	0.999927	0.118216	Mccc1	0.960403	1	0.218218	Fdx1	4.28502	0.000203463	0.451138	Fam76a	0.869862	0.999953	0.476212
Kdsr	1.08542	0.999927	0.131566	Ubn1	0.959211	1	0.0674409	Cdk2	4.28319	0.000204996	0.684998	Cbx6	0.868868	0.999953	0.329204
Msantd2	1.08385	0.999927	0.427427	Ercc6	0.956916	1	0.322487	Cope	4.28107	0.000206812	0.395058	Naa35	0.868751	0.999953	0.356091
Tmem147	1.08232	0.999927	0.0679393	Pdgfc	0.954531	1	0.357281	Surf4	4.27664	0.000210826	0.525826	Psme2b	0.868341	0.999953	1.88505
Dctn5	1.0819	0.999927	0.194792	Nf1	0.952887	1	0.227507	Bud23	4.27469	0.000212529	0.543924	Chfr	0.86764	0.999953	0.860507
Ggnbp1	1.08166	0.999927	0.397455	Zfp945	0.950006	1	0.0755809	Lbr	4.27406	0.00021298	0.481684	Hook1	0.86647	0.999953	0.907237
Lcmt2	1.0816	0.999927	0.339804	Ddx54	0.949933	1	0.069878	Vrk1	4.27051	0.000216243	0.543655	Chmp3	0.866353	0.999953	0.543375
Zbtb38	1.08133	0.999927	0.0697202	Rere	0.949211	1	0.154582	Mrps34	4.26872	0.000217838	0.473166	Fut10	0.864189	0.999953	1.18944
Alg2	1.08117	0.999927	0.169172	Epb41l4b	0.947711	1	0.0755471	Ndufb3	4.26431	0.000222024	0.393951	Cysltr2	0.863662	0.999953	1.17289
Sept4	1.08117	0.999927	0.522915	Cd200	0.946464	1	0.329713	Kansl3	4.25677	0.000229317	0.573207	Dnajc30	0.862025	0.999953	0.591903
Socs4	1.08027	0.999927	0.271914	Vps13b	0.945868	1	0.163933	Rad23a	4.25602	0.000229928	0.468124	Bphl	0.859042	0.999953	0.516339
Gm37469	1.07977	0.999927	0.810359	Scnm1	0.945019	1	0.0948209	Tmem39b	4.25484	0.000230984	0.722666	Anapc4	0.858984	0.999953	0.515151
Gigyf2	1.07848	0.999927	0.122052	Uri1	0.943212	1	0.0587035	Nup153	4.24658	0.000239325	0.749101	Trim24	0.85875	0.999953	0.745065
Chtf8	1.07827	0.999927	0.0999053	Mrpl24	0.941586	1	0.0396477	Cmpk1	4.24629	0.000239469	0.417766	Rasa4	0.858633	0.999953	1.40545
Rpp21	1.07821	0.999927	0.104791	Sytl1	0.941532	1	0.174365	Aldh9a1	4.24532	0.000240336	0.481478	Cebpzos	0.858048	0.999953	0.448725
Atg4b	1.07563	0.999927	0.219259	Lrrc8d	0.940909	1	0.203916	Gnas	4.23716	0.000248895	0.189024	Dpm1	0.857755	0.999953	0.323923
Vps4b	1.07314	0.999927	0.0967229	Cbfa2t3	0.940105	1	0.0310384	Cenpb	4.23244	0.000253993	0.407916	Fads1	0.857404	0.999953	0.477646
Jmjd8	1.07284	0.999927	0.222013	Mbip	0.939446	1	0.14479	Fam50a	4.22744	0.000259344	0.556395	Mpv17l2	0.856761	0.999953	0.638439
Ttl	1.07258	0.999927	0.49382	Poldip3	0.936817	1	0.142575	Eef1e1	4.21975	0.000268164	0.475001	Zcchc17	0.856352	0.999953	0.349286
Abcg1	1.07185	0.999927	0.179107	Znrf3	0.932517	1	0.479363	Saal1	4.21052	0.000278965	0.798581	Gid8	0.856001	0.999953	0.640969
Fcer1g	1.0713	0.999927	0.0957455	Eif3e	0.931875	1	0.00543947	Lsm11	4.20934	0.000280234	1.01025	Syf2	0.855123	0.999953	0.202972
Cd3eap	1.07001	0.999927	0.163852	Mapre3	0.931397	1	0.322442	Clpp	4.20489	0.000285609	0.443914	Cd46	0.854714	0.999953	1.67567
Pabpc4l	1.06973	0.999927	0.344915	Srsf6	0.930927	1	0.0414901	Nubp2	4.2023	0.000288502	0.556152	Abraxas1	0.853603	0.999953	0.649743
Gsap	1.06895	0.999927	0.265021	Rock2	0.925272	1	0.0358045	Nip7	4.20173	0.000289027	0.472044	Fkbp8	0.853486	0.999953	0.241014
1700029J07Rik	1.06844	0.999927	0.44378	Ociad1	0.923438	1	0.034703	Tst	4.19906	0.000292254	0.799876	4930503L19Rik	0.853427	0.999953	0.834669
Zfp120	1.06812	0.999927	0.252642	Cdk13	0.923023	1	0.0871087	Pusl1	4.19501	0.000297323	0.880313	Apol9b	0.853135	0.999953	3.42363
Sema7a	1.06786	0.999927	0.530705	Wdsub1	0.922923	1	0.28054	Cs	4.19407	0.000298348	0.488574	Cisd2	0.852959	0.999953	0.335864
Ints6	1.06762	0.999927	0.166153	Tle4	0.922698	1	0.134805	Cyb5r3	4.18283	0.000313271	0.462613	Dpm3	0.851673	0.999953	0.279199
Lrrc49	1.0669	0.999927	0.263257	Decr2	0.919301	1	0.35052	Mdfi	4.18084	0.000315381	0.541028	Ptpn4	0.851556	0.999953	0.911732
P3h3	1.06622	0.999927	0.139368	Map3k3	0.919075	1	0.259531	Slc20a2	4.18038	0.000315803	1.19978	Nmnat3	0.851322	0.999953	0.634703
Mtg2	1.06583	0.999927	0.189774	Man1c1	0.918714	1	0.322937	Ndufs3	4.18018	0.000315862	0.40944	Gm46224	0.851205	0.999953	3.58725
Dhx30	1.06561	0.999927	0.11294	Med4	0.916401	1	0.0680902	Dus1l	4.18001	0.00031588	0.640727	Zbtb10	0.851088	0.999953	0.969321
Zfp286	1.06534	0.999927	0.41205	Rnf146	0.915489	1	0.0891655	Zzz3	4.17921	0.000316773	0.472358	Zmym3	0.849567	0.999953	0.848893
Cln8	1.06496	0.999927	0.349579	Glyr1	0.913935	1	0.0704769	Ctsd	4.1758	0.000321332	0.361478	Csrnp1	0.848807	0.999953	0.592865
Ercc5	1.06264	0.999927	0.279032	Gemin7	0.9138	1	0.0452975	Chd3os	4.17233	0.000326041	1.58778	Bicral	0.847754	0.999953	0.90711
Dnajc4	1.06084	0.999927	0.194829	Snhg12	0.913465	1	0.0302359	Drap1	4.17187	0.000326477	0.349958	Anp32a	0.847579	0.999953	0.127623
Gpatch4	1.06003	0.999927	0.113089	Gad2	0.91342	1	3.97055	Lsm14a	4.16891	0.000330523	0.446014	Bag4	0.847052	0.999953	0.588544
Zfp62	1.05938	0.999927	0.136217	Nbeal1	0.913303	1	0.178626	Ncbp3	4.16538	0.00033545	0.639276	Ddx5	0.846818	0.999953	0.0826345
Nudt7	1.0577	0.999927	0.273408	Il4	0.913294	1	0.153407	Mif4gd	4.16342	0.000338119	0.653128	Selenoi	0.846117	0.999953	0.935372
Zmym5	1.05733	0.999927	0.10356	Cyfip1	0.912707	1	0.065648	Pgd	4.1583	0.000345301	0.506793	Rngtt	0.845883	0.999953	0.689419
Tinagl1	1.05481	0.999927	0.10458	4930453N24Rik	0.910584	1	0.128226	Rbm8a	4.15533	0.00034959	0.374347	Ctsc	0.845707	0.999953	0.446948
Gm17690	1.05388	0.999927	0.996928	Stk40	0.910385	1	0.265212	Cox8a	4.15381	0.000351681	0.178956	Baz2a	0.845649	0.999953	0.539398
Utp11	1.0524	0.999927	0.0450516	Nit1	0.909491	1	0.158913	Gadd45gip1	4.15295	0.000352765	0.430836	Nolc1	0.844596	0.999953	0.362377
Nol11	1.05098	0.999927	0.101972	Pfn2	0.907856	1	1.09879	Dcps	4.1521	0.000353828	0.451627	Zc2hc1a	0.843894	0.999953	0.82576
Snx6	1.05002	0.999927	0.0547789	4931406P16Rik	0.907467	1	0.139356	Rrp15	4.15141	0.000354656	0.469066	Aim2	0.843543	0.999953	0.752551
Setd1b	1.04959	0.999927	0.143798	Tubb2a	0.906925	1	0.372119	Trnt1	4.15005	0.000356294	0.537897	Rpl7a-ps5	0.843309	0.999953	1.6884
Golph3l	1.04915	0.999927	0.166218	Clip3	0.906447	1	0.211072	Haus8	4.1471	0.000360665	1.18706	Rnps1	0.843192	0.999953	0.318935
Hsbp1	1.04865	0.999927	0.0214393	0610030E20Rik	0.905914	1	0.0936194	Dbr1	4.14174	0.000368944	0.861808	Dyrk1b	0.842607	0.999953	1.68529
Dzip3	1.0484	0.999927	0.246386	Coro7	0.905426	1	0.0660226	1110065P20Rik	4.14093	0.000370004	0.648741	Pola2	0.842374	0.999953	0.989933
Ube4a	1.04827	0.999927	0.209783	Zc3h18	0.905263	1	0.104306	Yeats4	4.13936	0.000372286	0.409173	Ehbp1	0.840444	0.999953	1.54156
Gata2	1.04795	0.999927	0.0352362	Aig1	0.90436	1	0.0513068	Eif4e	4.1379	0.000374327	0.422693	Cds1	0.840385	0.999953	3.30102
Hmgn3	1.04772	0.999927	0.0394821	Ttll3	0.903746	1	0.697952	Ttc7	4.1378	0.000374327	0.744181	Met	0.840268	0.999953	3.72549
Nbr1	1.04632	0.999927	0.182266	Irak2	0.903185	1	0.41182	Tsr1	4.13499	0.000378167	0.705312	Bcas2	0.839215	0.999953	0.224156
Gm46218	1.04482	0.999927	0.805542	Rasa4	0.902643	1	0.291273	Ifit2	4.13451	0.000378695	0.942111	Atrip	0.838396	0.999953	0.718529
Scd2	1.04459	0.999927	0.106887	Pdlim7	0.901261	1	0.129529	Lap3	4.1335	0.000380113	0.461803	Zfp189	0.835589	0.999953	1.63098
Jagn1	1.04375	0.999927	0.0939808	Tgfb1	0.901234	1	0.0597722	Ilkap	4.13281	0.000381	0.433029	Tbc1d8	0.834653	0.999953	1.25289
Ctbs	1.04351	0.999927	0.372174	Cdv3	0.900819	1	0.060788	Ormdl2	4.13186	0.000382324	0.474121	Slc7a6os	0.834186	0.999953	0.751042
Slc35a1	1.04335	0.999927	0.183228	Manbal	0.898262	1	0.100219	Igsf8	4.12817	0.000388238	0.895367	Slc25a26	0.833659	0.999953	1.15008
Ubqln2	1.04322	0.999927	0.111653	Vps37b	0.898118	1	0.109921	Nap1l4	4.12355	0.000395845	0.396238	Mrpl14	0.833016	0.999953	0.30798
Agpat1	1.04271	0.999927	0.26685	Fyn	0.897278	1	0.167436	Pitrm1	4.11925	0.00040303	0.584063	B3gntl1	0.832957	0.999953	1.86564
Rprd1a	1.04153	0.999927	0.379834	Bod1	0.897232	1	0.0713883	Stk16	4.11631	0.000407941	0.441759	Snhg18	0.832899	0.999953	1.59386
Trabd	1.04088	0.999927	0.0961825	Pi4k2b	0.896898	1	0.245334	Mrpl46	4.1111	0.000416966	0.574481	Atp5d	0.832197	0.999953	0.21607
3010003L21Rik	1.03991	0.999927	0.2331	Dusp18	0.896817	1	0.716321	Stard7	4.10961	0.0004191	0.540816	Vrk1	0.831671	0.999953	0.429064
Zfp949	1.03975	0.999927	0.285839	Dmwd	0.895615	1	0.157034	Prodh	4.10814	0.000421217	0.6828	Fkbp2	0.830442	0.999953	0.432343
Mat2a	1.03887	0.999927	0.0235724	Bclaf3	0.894396	1	0.182603	Bcap31	4.10573	0.000425064	0.309271	Rnpep	0.830384	0.999953	0.472326
Szrd1	1.03881	0.999927	0.181686	Rprml	0.89426	1	2.16687	AU020206	4.10472	0.000426646	0.508285	Optn	0.830267	0.999953	2.05843
Styx	1.03854	0.999927	0.340723	Dctn3	0.892074	1	0.0386055	Ndufs5	4.09999	0.000435165	0.378277	Snx4	0.830267	0.999953	0.421206
Ikbip	1.03772	0.999927	0.149896	Zfp800	0.891803	1	0.0811827	Pgs1	4.09795	0.000438727	0.71521	Fem1b	0.829507	0.999953	0.720754
Zfp747	1.03766	0.999927	0.896635	Akt2	0.890259	1	0.103792	Abhd11	4.09112	0.00045125	0.50424	Il3ra	0.828278	0.999953	0.801298
Armc7	1.03708	0.999927	0.657515	Tek	0.890105	1	0.208241	Mns1	4.08929	0.000454515	1.61553	Tapbpl	0.828044	0.999953	0.666655
Gabpb2	1.03626	0.999927	0.147824	Srp54a	0.890006	1	0.241349	Bub3	4.08859	0.000455597	0.405304	Washc4	0.827811	0.999953	0.463947
Hibadh	1.03615	0.999927	0.0490993	Ints6l	0.887549	1	0.150032	Ckap2	4.08743	0.000457559	2.36285	Dnajc11	0.82705	0.999953	0.557058
Scap	1.03418	0.999927	0.263737	Ip6k1	0.887314	1	0.0667426	Utp20	4.08636	0.000459376	1.00402	Nek4	0.82705	0.999953	1.05534
Hibch	1.03395	0.999927	0.169667	Renbp	0.88651	1	0.219872	Itgb3bp	4.08154	0.000468386	0.705681	March5	0.826348	0.999953	0.325693
3110040N11Rik	1.03366	0.999927	0.22559	Plbd2	0.885796	1	0.105336	Uqcrc1	4.08074	0.000469686	0.388375	Zfp57	0.826348	0.999953	1.57114
Drg2	1.03275	0.999927	0.185658	Ypel2	0.88539	1	0.409813	Mrps11	4.07898	0.000472952	0.567079	Gm26797	0.82588	0.999953	3.28797
Gm13111	1.03225	0.999927	0.506598	Clasp2	0.88352	1	0.141842	Mtf2	4.07726	0.000476146	0.426125	Pabpc4	0.825763	0.999953	0.434973
Csnk2a1	1.03185	0.999927	0.0950626	Kdm6bos	0.883384	1	2.04095	Ppie	4.07084	0.000489129	0.403923	Casp1	0.825296	0.999953	0.576908
Eya2	1.03154	0.999927	0.129841	Tmem168	0.879102	1	0.122648	Rps20	4.06915	0.000492361	0.0691633	Gadd45a	0.825179	0.999953	0.90525
Mob3c	1.03126	0.999927	0.173646	Cd200r1	0.875588	1	0.147467	Eif3d	4.06679	0.000497051	0.299849	Ebp	0.82512	0.999953	0.392478
Gm16070	1.03126	0.999927	0.479517	Chmp2b	0.875471	1	0.0475881	Ddx18	4.06535	0.000499806	0.435103	Tuba1a	0.825003	0.999953	1.19573
Thra	1.03025	0.999927	0.0736177	Qpctl	0.874794	1	0.365678	Itga2b	4.06205	0.000506257	1.19744	Zfp598	0.824067	0.999953	0.717643
Ctsc	1.02989	0.999927	0.0862429	Sipa1l3	0.873511	1	0.164449	Anapc13	4.06143	0.000507256	0.412334	Blm	0.824009	0.999953	1.02739
Mfsd8	1.02976	0.999927	0.461142	Zfp746	0.873321	1	0.110383	Wdr83os	4.06017	0.000509662	0.327753	Polr2l	0.82319	0.999953	0.697449
Dhdh	1.0297	0.999927	0.267166	Shisa9	0.872047	1	0.298137	Rfwd3	4.05591	0.000518716	0.983567	Med9	0.822137	0.999953	0.431046
Pkn2	1.0292	0.999927	0.0821551	Cldnd1	0.871822	1	0.0499955	Rheb	4.05489	0.000520626	0.393183	Arhgef10	0.822137	0.999953	1.73339
Neil1	1.0278	0.999927	0.599305	Zfp414	0.870575	1	0.147543	Lsm5	4.05066	0.000529795	0.403711	Zfp964	0.82202	0.999953	2.96602
Ctsl	1.0278	0.999927	0.0332356	Fxyd1	0.86829	1	0.448966	Dhx15	4.05033	0.000530176	0.431389	Hoxa3	0.82167	0.999953	0.636264
Tpd52	1.02714	0.999927	0.0639489	Cstf2t	0.867748	1	0.288584	Idi1	4.05	0.000530593	0.391177	Kbtbd2	0.82167	0.999953	0.729186
Ctu1	1.02665	0.999927	0.448888	Stat3	0.867332	1	0.0562193	Eif2s2	4.04978	0.000530732	0.331325	Slc16a6	0.821202	0.999953	1.02267
3110062M04Rik	1.02655	0.999927	0.177797	BC029722	0.867332	1	0.120533	Fam69a	4.03762	0.000558625	0.645658	Nars	0.821026	0.999953	0.292362
Rnf13	1.0264	0.999927	0.103793	Htatsf1	0.865263	1	0.0630849	Pdcd5	4.03672	0.000560417	0.376265	Rbm4b	0.820734	0.999953	0.388472
Xist	1.02599	0.999927	0.0783614	Fam98b	0.862969	1	0.117863	Slc25a1	4.03531	0.000563429	0.490562	Tlr3	0.8205	0.999953	3.1647
Nagpa	1.02514	0.999927	0.291109	Sash1	0.86249	1	0.130844	Nudt2	4.03369	0.000566938	0.483826	Eif1ad	0.8205	0.999953	0.469135
Letmd1	1.02511	0.999927	0.181926	Golga3	0.861442	1	0.297659	Wdr5	4.03288	0.000568533	0.544811	Fer	0.819623	0.999953	1.79924
Tead2	1.02388	0.999927	0.307284	Bnip3l	0.861397	1	0.0165861	Tpr	4.03066	0.000573568	0.28387	Stip1	0.81933	0.999953	0.377177
Rrbp1	1.02369	0.999927	0.0446452	Osbpl9	0.861045	1	0.0603843	Prmt7	4.02986	0.000575143	0.482604	Prkaca	0.818921	0.999953	0.693673
Hdac11	1.02199	0.999927	0.164049	Clcn5	0.860394	1	0.332985	Haus7	4.02892	0.000577061	0.877358	Srsf4	0.81857	0.999953	0.464628
Erbin	1.02155	0.999927	0.0972336	Atf7	0.858542	1	0.11553	Cnpy3	4.02765	0.000579818	0.445989	Traf3	0.81816	0.999953	1.15255
Map2k5	1.02071	0.999927	0.120704	1810044D09Rik	0.858308	1	0.220749	Dpy19l1	4.02468	0.000586782	1.01331	Zfp287	0.817575	0.999953	1.48786
Bmt2	1.02023	0.999927	0.227957	Hspa13	0.858172	1	0.168409	Gm8186	4.02401	0.000588085	0.610881	Fbrs	0.8174	0.999953	0.829606
Eif4a2	1.01944	0.999927	0.018964	Fam102a	0.857612	1	0.355629	Trim37	4.01899	0.000599776	0.771748	Ube2e3	0.817283	0.999953	0.236059
Slc17a5	1.01721	0.999927	0.328915	Hnmt	0.856799	1	0.130676	Comtd1	4.01853	0.000600362	0.62398	Ublcp1	0.817166	0.999953	1.63906
Epm2aip1	1.01614	0.999927	0.192604	Kif1bp	0.855742	1	0.170561	2810004N23Rik	4.01689	0.000604168	0.445212	Ccdc117	0.816874	0.999953	0.802222
Paqr8	1.016	0.999927	0.615986	Fgd4	0.855643	1	0.1382	Psmb6	4.01254	0.000614599	0.34351	Zgrf1	0.816347	0.999953	1.54179
Uggt1	1.01592	0.999927	0.224473	Ifnar2	0.855489	1	0.0833853	Rbbp8	4.01233	0.00061476	1.28697	Homer3	0.815938	0.999953	0.622016
Ganc	1.01555	0.999927	0.162854	Trio	0.855417	1	0.233418	Aatf	4.01058	0.000618933	0.467449	Meis3	0.815645	0.999953	1.48722
Nudt13	1.01389	0.999927	0.189018	Polg	0.854324	1	0.180435	Fam136a	4.00976	0.000620667	0.494787	Top1	0.815178	0.999953	0.162032
A430078G23Rik	1.01194	0.999927	0.346066	Jade1	0.853845	1	0.0979752	Gtf2f2	4.00562	0.000630834	0.696185	Tbc1d9	0.814593	0.999953	1.43077
Dstn	1.01132	0.999927	0.0643866	Stap1	0.852915	1	0.0409247	Map2k2	4.00428	0.000633998	0.397492	Sesn2	0.814066	0.999953	1.4876
Ift80	1.00972	0.999927	0.255391	Zdbf2	0.851126	1	1.25288	Ahsa2	4.00126	0.000641742	0.528309	Ino80c	0.812604	0.999953	0.766789
Homez	1.00968	0.999927	0.288567	Kif3a	0.850855	1	0.0992183	Gcat	3.99976	0.000645417	0.718953	Taf8	0.812136	0.999953	0.872102
Pglyrp2	1.00929	0.999927	0.0590143	Tmem71	0.850042	1	0.126725	Cops4	3.99934	0.000646131	0.40122	Srgn	0.811902	0.999953	0.106256
Nop14	1.00913	0.999927	0.0984157	Fchsd2	0.850006	1	0.044409	Nop2	3.99876	0.000647308	0.661176	Sec13	0.811727	0.999953	0.412569
Sdhaf4	1.00716	0.999927	0.0667762	Mxi1	0.849897	1	0.103777	Arl2	3.99791	0.000649202	0.503529	Ccdc137	0.811025	0.999953	1.17606
Tmem222	1.0069	0.999927	0.0659733	Tmem68	0.849211	1	0.25669	Sqle	3.9946	0.000657506	0.530752	Junb	0.810967	0.999953	0.359797
Fam45a	1.00648	0.999927	0.266115	Rasal3	0.84866	1	0.128044	Pfkl	3.99334	0.000660583	0.396981	Ndufb5	0.809914	0.999953	0.1888
Jrk	1.00503	0.999927	0.547083	Rara	0.848127	1	0.345662	Metap2	3.99194	0.00066406	0.366257	Ssh2	0.809855	0.999953	0.549112
Twnk	1.00411	0.999927	0.221712	Cdk5rap1	0.847133	1	0.31961	Pcyt2	3.98758	0.000675942	0.472751	Anapc13	0.809855	0.999953	0.330833
Orai1	1.00393	0.999927	0.0406989	2810001G20Rik	0.846176	1	0.166719	Ada	3.9868	0.00067774	0.997156	Ube2v2	0.809446	0.999953	0.321391
Hist1h1e	1.00368	0.999927	0.182386	Kdelr1	0.845968	1	0.0105951	Knop1	3.98629	0.000678449	0.501385	Vnn1	0.809329	0.999953	1.42764
Oard1	1.00322	0.999927	0.0724442	Mex3c	0.84576	1	0.18778	Cox18	3.98625	0.000678449	0.792645	Isoc2b	0.808686	0.999953	0.670203
Fam185a	1.00316	0.999927	0.453018	AU019823	0.845516	1	0.119346	Tfap4	3.98507	0.000681398	0.474527	Cyld	0.808452	0.999953	0.5199
Dap	1.00242	0.999927	0.0605976	Faap20	0.845408	1	0.0501075	Sephs2	3.98359	0.0006852	0.479121	Iws1	0.807808	0.999953	0.441191
Ppp4r3b	1.00137	0.999927	0.0902491	Dhrs7	0.844938	1	0.114215	Pop5	3.97076	0.000722254	0.428476	Hnrnpul1	0.807457	0.999953	0.352142
Diaph1	1.00107	0.999927	0.0331091	Baz2b	0.844712	1	0.054427	Selenof	3.96649	0.000734832	0.253821	Ube3b	0.807457	0.999953	0.592816
Osbpl1a	1.00104	0.999927	0.0613257	Dok3	0.844577	1	0.323724	mt-Nd2	3.96232	0.000746851	0.119859	Rnf14	0.807106	0.999953	0.52735
Gm20300	1.00101	0.999927	0.516974	Slc39a7	0.842779	1	0.0929499	Spidr	3.96088	0.0007509	1.18431	Tbx1	0.807048	0.999953	2.84225
Spns1	0.998907	0.999927	0.239421	Stau2	0.842436	1	0.0936723	Bag5	3.96068	0.000751049	0.477812	Mum1	0.806229	0.999953	0.372682
Myl12b	0.998738	0.999927	0.0051095	Mfn2	0.84231	1	0.203944	Acd	3.9596	0.000753475	0.56705	Fes	0.806054	0.999953	0.581955
Rbm28	0.997857	0.999927	0.14648	Tspan13	0.842029	1	0.0249784	Brip1os	3.9584	0.00075678	0.765444	Ints3	0.805176	0.999953	0.858705
Tatdn1	0.996834	0.999927	0.186611	Nsa2	0.841632	1	0.00233688	Nop14	3.95602	0.000763381	0.428524	Sap130	0.805118	0.999953	1.65355
AI314180	0.996363	0.999927	0.0894337	Hacl1	0.841379	1	0.230066	Tfam	3.95582	0.000763533	0.427626	Banf1	0.80506	0.999953	0.31292
Leprot	0.99591	0.999927	0.08871	Dusp11	0.840629	1	0.0485366	Alkbh2	3.95427	0.000768013	1.32214	Setd7	0.804358	0.999953	0.466826
Wdr82	0.995803	0.999927	0.167408	Idh3g	0.840214	1	0.0311144	Eif4e2	3.95325	0.000770834	0.418006	E430018J23Rik	0.804299	0.999953	1.5043
[truncated: 14,457 more rows]

## Sheet: HSC
Metabolism_n	Metabolism_s	Metabolism_p	Metabolism_l	Quiescent_n	Quiescent_s	Quiescent_p	Quiescent_l	Activated_n	Activated_s	Activated_p	Activated_l	Interferon_n	Interferon_s	Interferon_p	Interferon_l	Acute-Activation_n	Acute-Activation_s	Acute-Activation_p	Acute-Activation_l	Cell-cycle_n	Cell-cycle_s	Cell-cycle_p	Cell-cycle_l
[truncated: 14,408 more rows]

[truncated: 1 more sheets: LSK]
