# Supplementary material for: External signals regulate continuous transcriptional states in hematopoietic stem cells
Source: eLife. 2021 Dec 23;10:e66512. doi: 10.7554/eLife.66512 (PMC8700284; doi:10.7554/eLife.66512)
Supplement: Supplementary file 5. — Gene lists curated from literature search and MsigDB. [file elife-66512-supp5.xlsx]

## Sheet: curated_pathways_treatments
GSE17721_CTRL_VS_POLYIC_8H_BMDC_DN	GSE21033_CTRL_VS_POLYIC_STIM_DC_12H_DN	GSE21033_CTRL_VS_POLYIC_STIM_DC_1H_DN	GSE39556_CD8A_DC_VS_NK_CELL_MOUSE_3H_POST_POLYIC_INJ_DN	CHEMNITZ_RESPONSE_TO_PROSTAGLANDIN_E2_DN	CHEMNITZ_RESPONSE_TO_PROSTAGLANDIN_E2_UP	GOBP_CELLULAR_RESPONSE_TO_PROSTAGLANDIN_E_STIMULUS	GOBP_CELLULAR_RESPONSE_TO_PROSTAGLANDIN_STIMULUS	GOBP_NEGATIVE_REGULATION_OF_PROSTAGLANDIN_BIOSYNTHETIC_PROCESS	GOBP_POSITIVE_REGULATION_OF_PROSTAGLANDIN_BIOSYNTHETIC_PROCESS	GOBP_RESPONSE_TO_PROSTAGLANDIN	GOBP_RESPONSE_TO_PROSTAGLANDIN_E	GSE17721_CTRL_VS_POLYIC_0.5H_BMDC_UP	GSE17721_CTRL_VS_POLYIC_12H_BMDC_DN	GSE17721_CTRL_VS_POLYIC_1H_BMDC_DN	GSE17721_CTRL_VS_POLYIC_1H_BMDC_UP	GSE17721_CTRL_VS_POLYIC_24H_BMDC_DN	GSE17721_CTRL_VS_POLYIC_24H_BMDC_UP	GSE17721_CTRL_VS_POLYIC_2H_BMDC_DN	GSE17721_CTRL_VS_POLYIC_2H_BMDC_UP	GSE17721_CTRL_VS_POLYIC_4H_BMDC_DN	GSE17721_CTRL_VS_POLYIC_6H_BMDC_DN	GSE17721_CTRL_VS_POLYIC_8H_BMDC_UP	GSE21033_CTRL_VS_POLYIC_STIM_DC_1H_DN	GSE21033_CTRL_VS_POLYIC_STIM_DC_1H_UP	GSE21033_CTRL_VS_POLYIC_STIM_DC_24H_DN	GSE21033_CTRL_VS_POLYIC_STIM_DC_24H_UP	GSE21033_CTRL_VS_POLYIC_STIM_DC_3H_DN	GSE21033_CTRL_VS_POLYIC_STIM_DC_3H_UP	GSE21033_CTRL_VS_POLYIC_STIM_DC_6H_DN	GSE21033_CTRL_VS_POLYIC_STIM_DC_6H_UP	GSE21927_SPLEEN_MONOCYTE_VS_GMCSF_GCSF_BONE_MARROW_DN	GSE21927_SPLEEN_MONOCYTE_VS_GMCSF_GCSF_BONE_MARROW_UP	GSE21927_UNTREATED_VS_GMCSF_GCSF_TREATED_BONE_MARROW_DN	GSE21927_UNTREATED_VS_GMCSF_GCSF_TREATED_BONE_MARROW_UP	GSE39556_UNTREATED_VS_3H_POLYIC_INJ_MOUSE_CD8A_DC_DN	GSE39556_UNTREATED_VS_3H_POLYIC_INJ_MOUSE_CD8A_DC_UP	GSE39556_UNTREATED_VS_3H_POLYIC_INJ_MOUSE_NK_CELL_DN	GSE39556_UNTREATED_VS_3H_POLYIC_INJ_MOUSE_NK_CELL_UP	PMID21474107_dmPGE2_VS_CTRL_1H_HUMAN_HSPCS_ALL_doses_UP	PMID21474107_dmPGE2_VS_CTRL_1H_HUMAN_HSPCS_UP	PMID24518205_GCSF_VS_CTRL_36H_KSL-SLAM_UP	PMID27481851_GCSF_VS_CTRL_5D_HUMAN_PMN_BMandPB_UP	PMID29915358_up_GCSF_VS_CTRL_48h_MOUSE_HSCs	PMID30249060_GCSF_VS_CTRL_BRAIN_UP	PMID32735825_dmPGE2_VS_CTRL_1H_SLAM-LKS_UP	PMID34129840_PGE2_VS_CTRL_MOUSE_MACROPHAGE_UP	REACTOME_SYNTHESIS_OF_PROSTAGLANDINS_PG_AND_THROMBOXANES_TX	WP_PROSTAGLANDIN_SYNTHESIS_AND_REGULATION
Acss1	Abi2	Acsl5	Abcb4	Abhd11	Adam19	Acaca	Acaca	Mir132	Anxa1	Aanat	Aanat	Abhd10	Abhd2	Abcd2	Aagab	Abr	Aaas	Aacs	Gzf1	Abcc8	Acvr1	Acadvl	Acsl5	Ace	Abca5	Abhd11	Aatf	Acad8	Aanat	Acsl5	Acat1	Abcb1	Aak1	Ac007773.1	Ablim1	Abcb4	Ablim1	Abhd3	Aanat	Acpp	Gzf1	Hspa6	Car1	Acot6	Crem	Ackr3	Akr1c3	Abcc4
Actn1	Abl1	Acvr1b	Abcg1	Ac002310.1	Afap1l1	Adcy6	Adcy6	Mir204	Avp	Acaca	Acaca	Acad10	Abi1	Acer1	Abca2	Actn1	Abcg2	Abcc1	Clec4e	Abr	Agtrap	Acat1	Acvr1b	Adam18	Adamtsl1	Abhd14a	Acad8	Adam10	Adamtsl2	Adamts7	Acp5	Abcb4	Abcg2	Acsl3	Acsl1	Abr	Acsl1	Acaa2	Abca1	Adcy3	Clec4e	Thra	Mt2	Flnb	Sgk1	Nrg1	Cbr1	Akr1b1
Adcy2	Acvr1	Aen	Ablim1	Ac005083.1	Afap1l2	Akap8	Akap8	Mir766	Avpr1a	Adcy6	Adcy6	Acsl6	Ackr3	Actg1	Acd	Adgrg1	Abi1	Abcf2	Abca4	Adap2	Alpk2	Ackr1	Aen	Adra1a	Adipor1	Acadsb	Actr5	Akap1	Aff1	Adnp2	Adamts6	Acad10	Adarb1	Ada2	Actn1	Acy1	Actn1	Adam19	Acsl4	Ahr	Abca4	Ccl5	Mt1	Vglu1	Gfpt2	Ramp3	Cyp8b1	Akr1c1
Adh7	Adcy8	Afdn-dt	Acsm3	Ac005162.2	Akap17a	Akt1	Akr1c2	Pibf1	Cd74	Akap8	Akap8	Acvr1	Actn1	Actn1	Actl6a	Agfg1	Acly	Adamts8	Igsf10	Adgrg1	Ap1ar	Acrbp	Afdn-dt	Alox12p2	Aifm1	Adamts10	Actr8	Anapc5	Aftph	Afdn-dt	Adck2	Acsm3	Add1	Adal	Ada	Adam19	Acvr1	Adam23	Acss1	Aim1	Igsf10	Gimap1	Pccb	Tagl	Pde4b	Fosb	Hpgd	Akr1c2
Adora1	Adora2b	Agfg1	Adh1a	Ac019171.1	Anapc1	Gnb1	Akr1c3	Sirt1	Il1b	Akr1c2	Akt1	Afm	Actn3	Alpl	Acvr2b	Agr3	Acot13	Adh7	Csf2rb	Adhfe1	Apod	Actr1b	Agfg1	Alpk3	Aip	Adcy7	Adcy3	Ankrd27	Amhr2	Aff4	Afdn	Adam30	Adgrl1	Adcy3	Adh1a	Adam28	Ada	Adarb1	Acvr1	Akap12	Csf2rb	Slamf6	Ctla2a	Ehd2	Fosl2	Nr4a2	Hpgds	Akr1c3
Arpc5	Akap10	Akt3	Akap11	Ac093627.4	Ank2	Gng2	Akt1		Pla2g3	Akr1c3	Ccl19	Agr3	Adra1a	Ampd2	Adnp	Aig1	Adcy2	Adrb3	Sell	Agtrap	Appbp2	Actr6	Akt3	Anxa1	Aldh2	Afdn	Adcy7	Anxa11	Amigo3	Agfg1	Agk	Adarb1	Aknad1	Agpat1	Aff1	Adam8	Aff1	Agl	Ada	Ang	Sell	Nlrc4	Rpl9	Myh11	Egln3	Thbs1	Prxl2b	Anxa1
Asb6	Akip1	Ammecr1	Alg13	Acaa2	Ap2s1	P2ry4	Apob		Ptgs2	Akt1	Ccl21	Agrp	Aldob	Angptl1	Akap8	Alpk2	Adcy8	Adrm1	Cdca3	Arl14ep	Arf6	Adam15	Ammecr1	Anxa2	Amph	Agfg1	Add1	Ap2s1	Angpt2	Akt3	Al606760.1	Agbl3	Alg2	Aimp2	Ahcyl2	Adarb1	Aif1	Anp32e	Adam19	Aplnr	Cdca3	Hsh2d	Rpl13	Flna	Plaur	Dmkn	Ptgds	Anxa2
Atf7	Akr7a2	Ank1	Ankrd17	Acss2	Arap3	Pparg	Gnb1			Apob	Ccr7	Akap1	Angpt1	Anxa8	Akr7a2	Anxa5	Adk	Akna	Gm11428	Asb3	Arhgap6	Adrb2	Ank1	Anxa2p2	Aoc1	Akt3	Agpat2	Ap5m1	Angptl1	Ammecr1	Ank3	Aida	Amn1	Ak3	Aif1	Aebp1	Ak1	Anxa2p1	Adam8	Asb6	Gm11428	Sh2d3c	Stmn1	Srbs2	Nr4a2	Sdcbp2	Ptges	Anxa3
Atp8b3	Amfr	Apobr	Arap2	Adam10	Asf1b	Prkaa1	Gng2			Ccl19	Gnb1	Aldh1b1	Appbp2	Arglu1	Alg5	Ap1g2	Ahctf1	Ankrd2	Serpinb1a	Atf3	Arhgef3	Akap8	Apobr	Arc	Apc2	Arhgap25	Ahsa1	Armc6	Ap3m2	Ank1	Ankrd13a	Akap12	Ankrd10	Akr7a2	Ak1	Agl	Akap12	Aox1	Aldh1a1	Bhlhb2	Serpinb1a	Dip2a	Rpl19	Hap1	Nr4a1	Gprc5a	Ptges2	Anxa4
Axin2	Ang	Aqp9	Arel1	Adamts9-as1	Asmtl	Prkaa2	P2ry4			Ccl21	Gng2	Als2	Arf4	Ash1l	Anapc7	Apobec2	Aifm1	Ankrd33	Socs3	Atp10a	Arid5b	Ankrd54	Aqp9	Arhgap33	App	Atp8b4	Aldh5a1	Arntl	Aplnr	Anxa5	Antxr2	Alg13	Apcdd1	Al606760.1	Akap12	Ahcy	Akt3	Ap3b1	Aldh1a2	C17orf91	Socs3	Helb	Prtn3	K1c42	Cebpb	Vdr	Ptges3	Anxa5
Bcdin3d	Antkmt	Arhgef10	Arhgap32	Adcy9	Aspm	Prkce	Pparg			Ccr7	Gnrh1	Ankrd46	Arglu1	Asprv1	Ankmy2	Arf4	Akr1b1	Apoa2	2810417h13rik	Best2	Armcx1	Anln	Arhgef10	Arhgef28	Atp5if1	Baiap3	Anapc13	Ash2l	Arfgef2	Apobr	Apbb1ip	Ankrd23	Arhgap17	Aldh18a1	Alox5ap	Ahnak	Ankrd17	Apbb2	Alox5ap	Cdkn1a	2810417h13rik	Klf14	Slc18a2	Anxa2	Hk2	Cish	Ptgis	Anxa6
Bcl2l1	Asf1a	Arih1	Arl6ip5	Adgra3	Atad2	Ptger2	Prkaa1			Edn1	Oxt	Anln	Arid3b	Atf7ip2	Anxa6	Arfrp1	Aldoa	Areg	Lpcat2	Bhlha15	Asb6	Apip	Arih1	Arhgef40	Atp5mc1	Bckdhb	Arhgef2	Atp5pd	Arid2	Apom	Atad2	Ankrd44	Arhgef9	Amn1	Ampd2	Alcam	Ap3s1	Apobec3b	Angel1	Creb5	Lpcat2	Oxer1	Dlk1	Sygp1	Fos	Fam20a	Ptgr2	Cbr1
Bfar	Asns	Ascc1	Asah1	Ago3	Atp6v1c1	Ptger4	Prkaa2			Gnb1	P2ry4	Antxr2	Arnt2	Atp10a	Aprt	Atad2b	Anln	Arid5b	Cdkn1a	Bloc1s6	Asgr2	Arhgdib	Ascc1	Arl4c	Atp5mc2	Bnip3	Arhgef3	Aven	Asxl2	Aqp8	Atp2b1	Apbb2	Atp13a3	Amotl2	Ankrd17	Aox1	Arhgef17	Apobec3g	Ank1	Crem	Cdkn1a	Lsm14b	Tspan31	Vime	Klf4	Ctla2a	Ptgs1	Cyp11a1
Bloc1s4	Atf7ip	Ash1l	Atad2b	Ahr	Aurka	Sfrp1	Prkce			Gng2	Pparg	Ap3b1	Atp13a1	Atp1b2	Asgr2	Basp1	Anxa6	Asb12	Dlk1	C11orf68	Asns	Arpc1a	Ash1l	Auts2	Atp6v1c2	Bola2	Ash2l	B3gat3	Atp2c1	Arhgap5	Atp6v0e1	Apobec3c	Bad	Anapc4	Anxa7	Apbb2	Asb9	Arhgap11a	Ano6	Csf1	Dlk1	Linc00889		Sphk2	Klf2	Ptgs2	Ptgs2	Edn1
Bloc1s6	Atp6v1c1	Aspa	Atg14	Aif1l	Bard1	Tnfsf4	Ptger2			Gnrh1	Ppp1r9b	Appl2	Atp6v1e1	Atxn1	Atad1	Bcl2l14	Apbb1ip	Atf6	Csf3r	C19orf12	Atad1	Asf1b	Aspa	B4galt3	Bex3	Bri3bp	Atp5pd	Bag2	Atxn7l1	Arhgef10	Bace2	Arhgap32	Bex3	Ankmy2	Ap3s1	Apobec3b	Atp2b4	Arhgap19	Ap3m2	Cul9	Csf3r	C6orf195		Cpsf6	Rgs2	Tgfb3	Tbxas1	Ednra
Bnip2	Atrn	Azi2	Baz2a	Akap12	Birc5		Ptger4			Oxt	Prkaa1	Aqp9	Bcdin3d	B2m	Atg3	Bfar	Arhgap17	Atg9b	Bcl10	Capza2	B3gat1	Asgr2	Azi2	Bglap	Blmh	Bzw2	Bag2	Bbs4	Axin1	Art3	Basp1	Arl4c	Btbd3	Anln	App	Aqp7	Baz2b	Arhgef9	Appl1	Cxcl1	Bcl10	Pnpla1		Arly	Nfkbiz	Slc4a11		Ednrb
Bst2	Babam2	B3gat1	Baz2b	Akap5	Bola3		Ptgfr			P2ry4	Prkaa2	Arf4	Bckdhb	B4galt3	Atp5pf	Bhlhe41	Arhgap6	Batf3	Ifitm1	Carhsp1	Bckdhb	Atp2a1	B3gat1	Bicdl1	Blvra	Card6	Banp	Bcor	Azi2	Ash1l	Bex2	Arsb	C1qa	Anxa4	Arap2	Arl4a	Bcl11a	Asl	Arfgap3	Cxcl10	Ifitm1	Parp15		Ncald	Cish	Cytip		Hpgd
C11orf68	Brix1	Baz1a	Blcap	Al021328.1	Bpnt2		Sfrp1			Pparg	Prkce	Arhgap12	Bfar	Bcl7c	Atp6v0d1	Bloc1s4	Arhgdib	Bcam	Tgfbi	Casp4	Bfsp1	Atp5f1a	Baz1a	Btn1a1	Bpnt1	Card9	Bex4	Bex4	B3galt2	Atf7	Bmpr1a	Atrnl1	Cap2	Arid3b	Arel1	Asmt	Bmi1	Asxl1	Arhgap15	Cxcl3	Tgfbi	Mfsd2a		Mlec	Pim3	Rab44		Hpgds
Ca1	C1rl	Bcar3	Btbd3	Al845331.2	Brip1		Tnc			Ppp1r9b	Ptger2	Arhgap18	Bloc1s4	Bmp2k	Bcl2l1	Bloc1s6	Arid4b	Bclaf1	S100a4	Cav1	Brinp1	Atp5if1	Bcar3	C22orf24	C2orf49	Ccr7	Bicdl1	Brd7	Bdp1	Atxn3	Bnipl	Avil	Ccdc113	Arl6ip1	Arhgap25	Asns	Brd1	Atp2a3	Arrdc2	Dock9	S100a4	Znf548		Rgrf2	Vegfa	Gng4		Hsd11b1
Cacna1d	Caap1	Btg3	C6orf62	Aldh3a2	Bub1		Tnfsf4			Prkaa1	Ptger4	Asah2	Bloc1s6	Bpgm	Blcap	Bst2	Arpc1a	Bloc1s4	Vrk3	Cbln1	C18orf21	Atp5mc3	Btg3	C22orf31	Casp3	Cd226	Blcap	Cblb	Bpifc	Azi2	Bola3	B9d2	Ccdc127	Asf1a	Arhgef17	Atp2b1	Brwd1	Bard1	Asph	Ebi2	Vrk3	C11orf45		Esyt1	Dusp5	Hilpda		Hsd11b2
Capn5	Camsap2	Bzw1	Cand2	Anxa11	Bub1b					Prkaa2	Sfrp1	Asz1	Bmp5	C1orf174	Brd3	C1orf52	Ascc1	Bmp15	Gadd45g	Cbs	C3orf52	Batf	Bzw1	C6orf47	Ccdc124	Cdon	Bmpr1a	Cd164	Braf	B3gat1	Btnl9	Bbs12	Cd24	Asxl1	Arl6ip5	Azgp1	Cacnb3	Bbs4	Atxn2l	Edg1	Gadd45g	Fbxl13		Ptrf	Dusp2	Dusp14		Mitf
Cav1	Ccdc198	Ca7	Cd19	Aox1	C19orf48					Prkce	Tgfbr3	Atl2	C19orf25	C1qbp	Bsg	Camk2d	Asgr2	Brd2	Prtn3	Ccdc71l	Cab39l	Bcam	Ca7	Cabyr	Ccdc9	Cep295nl	Brcc3	Cd244	Btbd7	Bach1	C19orf53	Bbs4	Cd86	Atf1	Armcx2	Bcl7a	Calcoco2	Bcl7a	Azin1	Efs	Prtn3	Mgc2848		Ppr21	Dusp1	Mir132		Pla2g4a
Ccdc6	Ccdc51	Calcoco1	Cd55	Ap000866.2	Ccnb1					Ptger2	Tnfsf4	Atn1	Cacng3	Ca11	C14orf119	Cav1	Atp5me	C12orf66	Igsf10	Ccl2	Cacna1h	Bcap29	Calcoco1	Cacna1i	Ceacam20	Chd2	Brd7	Cdc7	C1orf50	Bcl2l11	C21orf62	Bcl7a	Cdca7	Atp13a3	Asb9	Bdh1	Ccn2	Blm	Bbc3	Elk3	Igsf10	Bricd5		Sycc	Ier2	Crem		Pparg
Ccdc9	Ccdc68	Ccdc177	Cd69	Ap1s3	Ccnb2					Ptger4		Atp6v1e1	Cacybp	Calb1	C5ar1	Cbwd2	Atraid	C5ar1	Apoo-ps	Ccnl1	Calcr	Bcap31	Ccdc177	Cacnb1	Celsr1	Clip1	C11orf95	Cenpu	C2cd3	Btbd7	C4orf48	Brd7	Cfd	Atp6v1fnb	Atp2b4	Birc3	Ccnd2	Brca1	Blnk	Epas1	Apoo-ps	Ndst1		Vamp1	Gpr84	Tlr5		Ppargc1a
Ccl13	Cep135	Cd247	Cdk12	Ap5m1	Cdc45					Ptgfr		Banf1	Calcr	Calcoco2	C5orf47	Ccdc71l	Bach2	Ccdc71l	Cd53	Cd27	Calcrl	Bhlhe22	Cd247	Cacnb3	Ces4a	Cpm	C17orf75	Cep192	C3orf22	Btg3	Ca4	Btbd9	Chchd1	Axin2	Atp6v0e2	Cbx1	Cd27	Btk	Brd4	Evi5	Cd53	C9orf43		Ehbp1	Mat2a	Ptprn		Ppargc1b
Ccne1	Cep164	Cd5	Cebpd	Ar	Cdc6					Sfrp1		Bcap31	Capza2	Catsperg	C9orf16	Ccl1	Bcap29	Ccnb2	Cenph	Cd38	Cav1	C1qbp	Cd5	Camk2a	Cfhr1	Cpq	C2cd2l	Cep68	Cav3	C6orf15	Cars1	C15orf40	Chp1	B4galt5	Auh	Ccdc69	Cd34	Bub1	Bre	F2r	Cenph	Rps6ka5		Srs10	Bcl2l11	Dusp5		Prl
Ccnj	Cep70	Cd59	Clcn4	Arhgef16	Cdkn3					Tgfbr3		Bex1	Cbln1	Ccdc198	Cacna1b	Ccl5	Bcl2l11	Ccrl2	Tmem173	Cd82	Ccdc6	C1qc	Cd59	Camta1	Cldn11	Ctsc	Cad	Cep72	Ccl3	Cabp1	Ccne1	C21orf62	Chrac1	Bbox1	Baz2b	Ccne1	Cd9	Bub1b	Brwd1	Fam86a	Tmem173	Clec7a		Hnrpm	Rnd3	Nfil3		Ptgdr
Ccnl1	Chaf1b	Cdkl2	Clcn6	Arl6ip6	Cenpe					Tnc		Birc5	Ccl13	Ccnl1	Camk1	Ccnt1	Bex3	Cct6a	C330027c09rik	Cdh3	Ccnl1	Ccdc167	Cdkl2	Capn5	Clec10a	Cyld	Cbr4	Chst10	Ccn6	Cd226	Cd1d	Carf	Ciao2b	Bend3	Bcl11a	Ccr6	Cd99	C14orf132	C12orf47	Fbln5	C330027c09rik	Best1		Prp8	Pdcd1	Rnf125		Ptgds
Cd70	Chd1	Cdkn2b	Crim1	Asrgl1	Cenpf					Tnfsf4		Bloc1s6	Ccl5	Cd3e	Carhsp1	Cct7	C12orf4	Cd14	Fam108b	Cdkn1a	Cd300lf	Ccna2	Cdkn2b	Cavin1	Clic6	Cyth3	Cbx3	Clcn5	Cd164	Cd79a	Cd58	Cav2	Cks2	Best2	Bex4	Cd180	Cds2	C1orf216	C12orf69	Fgfr1	Fam108b	Oscar		Cspg5	Il4ra	Ccno		Ptger1
Cd79a	Chrm5	Cdv3	Csk	Astn2	Cenpu					Yy1		Bnip1	Ccnl1	Cdcp1	Ccnb2	Cd209	C19orf48	Cdkn1a	Selp	Cebpd	Cd47	Ccr2	Cdv3	Ccdc7	Cnbp	Cyth4	Cbx5	Cln5	Cd2ap	Cdh17	Cd80	Cbx3p2	Cmtm7	Btbd3	Bmi1	Cd19	Cep68	Camk4	C17orf48	Fntb	Selp	Srgn		Limc1	Clec4e	Ddit4		Ptger2
Cdh6	Chst15	Cebpb	Csnk1d	Atxn1l	Chaf1a							Bnip2	Cd47	Cdh3	Cd300c	Cd47	Ca12	Cenpf	Eno1	Chd1	Cep350	Cct8	Cebpb	Ccr8	Col8a2	Dlx4	Cbx7	Cnot9	Cdc37l1	Cdv3	Cd82	Ccdc189	Colgalt1	C17orf80	Cacnb3	Cd1c	Chd1	Camsap1	C18orf32	Galnt1	Eno1	Atp8b3		Ans1b	Sparc	Arg1		Ptger3
Cga	Cited2	Cenpt	Cxcl2	Axin2	Chd1l							Brms1	Cd83	Cdh9	Cebpg	Cd82	Casp6	Ces1	Vldlr	Chst15	Chic2	Cd81	Cenpt	Cd47	Commd3	Dse	Ccdc92	Coa3	Cdk13	Cep135	Cd99	Ccdc30	Coro2b	C1d	Calcoco2	Cd1d	Chst15	Ccdc69	C1orf201	Gata3	Vldlr	Cass4		Brsk1		Gpr171		Ptger4
Chd1	Cldn14	Chmp1b	Cxcl3	Bbs12	Chmp7							C21orf91	Cdkn1a	Cdkal1	Cep104	Cd83	Ccdc58	Cflar	2810417h13rik	Clcn1	Chtop	Cdk5	Chmp1b	Cd82	Cops9	Dtx1	Ccna2	Coasy	Ces2	Cep170	Cisd1	Ccdc82	Cox5a	C2orf42	Cd96	Cd48	Ckmt2	Ccna1	C1orf71	Gna15	2810417h13rik	S100z		Pgbm		Il1r2		Ptges
Clk3	Clstn1	Chpf2	Cyld	Bbs2	Cks2							C2orf76	Cenpm	Cdrt4	Chchd1	Cdh1	Ccna2	Chadl	Csf2rb2	Cldnd1	Clasp2	Cdkal1	Chpf2	Cdk5rap3	Coq7	Dyrk2	Ccnd3	Colgalt1	Chst5	Cfap70	Ckap4	Ccnt1	Crebrf	C4orf46	Cd99	Cd52	Cobl	Ccne1	C5orf13	Gpd2	Csf2rb2	Scarf1		Eif3h		Nt5e		Ptgfr
Cnmd	Creld2	Chrm4	Cyth1	Bbs4	Ddias							C5orf15	Ces4a	Cebpz	Churc1	Cep350	Ccnb2	Chka	Pla2g7	Clec5a	Clcf1	Cenpb	Chrm4	Cdkl2	Cox20	Eipr1	Cd244	Coq8a	Clec9a	Chmp1b	Cops9	Cd40	Creg1	Capza2	Cds2	Cd72	Crim1	Ccne2	Ca1	Grb2	Pla2g7	Mocs1		Lamc1		Fbxo31		Ptgfrn
Col9a1	Crtam	Chrna3	Dapk1	Bcar1	Dgat1							C9orf64	Chga	Cflar	Cideb	Chd1	Cd177	Chmp3	Ms4a6c	Cmtm6	Clcnka	Cers2	Chrna3	Cers4	Cpxm2	Elovl6	Cdc23	Crat	Cog1	Chmp2a	Coq3	Cd8b	Crym	Carnmt1	Cers6	Cd83	Csnk1a1	Ccnf	Cacna2d2	Gzma	Ms4a6c	Znf277		Khdr3		Trem1		Ptgir
Crbn	Csf2	Clk1	Dhrs7	Bcl11a	Dipk1a							Camk2g	Ciita	Chrna4	Clcf1	Cldn14	Cd300c	Chrna2	Lbp	Cnmd	Clip1	Cers5	Clk1	Cfap298	Ctnnal1	Elovl7	Cep350	Creg1	Crebbp	Cmc2	Crip1	Cenpbd1	Cshl1	Cbx6	Chst15	Cdc25b	Csnk1e	Cd180	Calcrl	Gzmb	Lbp	Kcnh7		Amrp		Rtn4r		Ptgis
Crk	Ctsc	Cmc2	Dnajc16	Bcl7b	Dlgap5							Casc3	Clcn2	Ciz1	Cngb3	Cmtr1	Cd81	Clcf1	Expi	Col4a2	Clk3	Cetn2	Cmc2	Chrm4	Dgki	Entpd6	Cep68	Cse1l	Ddx46	Cmklr1	Csnk1g1	Cenpw	Cul4b	Cct4	Ckmt2	Cemip	Ctbs	Cd19	Caprin1	Gzmk	Expi	Scml4		Dlgp3		B3gnt5		Ptgs1
Crym	Cyp11b2	Coq2	Dock4	Bend7	Dnajc18							Cckbr	Clec5a	Col5a1	Cpt1a	Col4a3	Ceacam21	Clint1	Tspo	Crlf3	Cox17	Clec6a	Coq2	Cited1	Dhrs1	Evl	Cep72	Ctnnbip1	Dennd1a	Cops2	Csrp1	Clgn	Cxcl2	Cdh15	Comt	Cma1	Dennd5a	Cd38	Cars	Hm74	Tspo	Sepw1		Plpl6		Btg2		Ptgs2
Csn2	Ddit3	Coq7	Dock9	Bicc1	Dysf							Ccr1	Clk3	Coro2b	Crebzf	Cops5	Cenpq	Clybl	Plscr1	Csf3r	Cpsf2	Clic1	Coq7	Cngb3	Dip2c	Eya2	Chst10	Dcun1d2	Dennd1b	Cpa4	Cxcr2	Cmtm3	Dazl	Cldn1	Creg1	Coch	Depp1	Cd72	Casp1	Hsp90b2p	Plscr1	Spin3		F120a		Isy1		S100a10
Cxcl9	Dlg4	Cplane2	Efcab14	Bphl	Eif4ebp1							Cd248	Cnn3	Cpa3	Crmp1	Cspg4	Churc1	Copg1	Rab27a	Cwc15	Cpsf4l	Clns1a	Cplane2	Copa	Dnaja2	Fbll1	Cit	Ddx24	Dicer1	Ctrc	Cyria	Cnksr2	Defb114	Clybl	Depp1	Cr2	Dmxl2	Cdc25b	Casp5	Ighg1	Rab27a	Hint1		Mic25		Rgcc		S100a6
Cyth1	Dnajb12	Crk	Esyt1	C11orf52	Ercc1							Cd84	Col4a4	Cpd	Crtap	Cst3	Ciita	Cpd	Il10ra	Cxcl9	Crabp2	Coa6	Crk	Cplane2	Dscam	Fbxl20	Colgalt1	Ddx46	Dnajc6	Cyp11b2	Ddx18	Coa5	Dgki	Cnih1	Dexi	Crip1	Dpyd	Cdc25c	Ccin	Il18r1	Il10ra	B3gnt7		Ubxn4		Cnnm2		Scgb1a1
Dab2	Dnajc3	Csf2	Evi5	C12orf75	Fam171b							Cdk16	Cops5	Crabp2	Cstb	Cuedc1	Cisd1	Cpsf4	Dhrs4	Dab2	Crbn	Crot	Csf2	Crim1	Edc4	Fgd3	Crebzf	Dlgap5	Dock2	Dcp1a	Ddx28	Cyp26a1	Dok7	Cnp	Dmxl2	Crym	Edem1	Cdc45	Ccl4	Il1r1	Dhrs4	Cacna1d		Calb2		Il1b		Sox9
Ddhd1	Dock10	Ctdp1	F13a1	C1orf210	Fancl							Celf2	Cpa1	Cst3	Cul4b	Cwh43	Clec4f	Crbn	Pim1	Dennd2d	Crisp2	Ctsa	Ctdp1	Crtc1	Egflam	Foxo1	Csf2rb	Dync1h1	Dusp7	Dctn5	Dennd1b	Cyp2c19	Duoxa2	Cops2	Dyrk3	Cspg5	Eif1	Cdc7	Ccne2	Il23a	Pim1	Slc8a1		Rbm14		Zcchc14		Tbxa2r
Ddit3	Efr3a	Ctrb2	Fam8a1	C6	Fbxo17							Cenpb	Cplx4	Cxcl10	Cyp1b1	Cx3cl1	Clns1a	Crlf3	Bex6	Dgat2	Crym	Cuedc2	Ctrb2	Csf1	Eif3m	Fxyd5	Ctbp1	Ebag9	Eid3	Ddit3	Dpagt1	Cyp2r1	E2f4	Cotl1	Edem1	Csrp1	Eng	Cdk2	Cd59	Jam1	Bex6	C15orf37		Ahi1		Gpr35		Tbxas1
Ddx4	Eri3	Ctrc	Fbxl5	C6orf132	Fez1							Cep85	Crk	Cxcl2	Cyp4f3	Dcakd	Cox16	Crtc2	Ier3	Dhx58	Ctrl	Cuta	Ctrc	Cyth1	Eloc	Gata1	Dalrd3	Efna3	F13a1	Ddx21	Dvl1	Dapp1	Elob	Creg1	Efcab14	Cstf2	Erg	Cdkn2c	Cdc6	Kcnmb4	Ier3	Gusbp1		Apex1		Nr4a1
Dhx58	Espl1	Dcp1a	Fcgrt	Cacnb2	Flt1							Chrnb2	Csf2	Dctn4	Dcps	Dctn4	Cpe	Csf1	Arid5a	Dop1b	Dbr1	Cxcr4	Dcp1a	Dapk2	Elof1	Ggt1	Diaph1	Ei24	Fam168b	Derl1	Ears2	Dnaja3	Elovl7	Crispld1	Erg	Cxcl1	Fam214b	Cdkn2d	Cdkn1c	Kiaa1267	Arid5a	Prmt5-as1		Iqec2		Runx3
Dusp16	F9	Ddr2	Fcmr	Camta1	Gemin5							Cilk1	Ctsk	Ddx5	Dhx8	Dda1	Cpped1	Cst7	Pnp2	Dtx2	Ddhd1	Cyp4f3	Ddr2	Dapk3	Elovl1	Gimap3p	Ei24	Elavl1	Fam24a	Dhcr7	Eefsec	Dnajc7	Elp6	Csgalnact2	Ets2	Cxcl11	Fam30a	Cemip	Cdx1	Kif1c	Pnp2	C19orf82		Ccar2		Ahr
Dyrk1a	Faf2	Desi1	Fez2	Capn1	Gjc1							Cited2	Cttn	Dele1	Dio1	Ddit3	Creb3l3	Cxcl11	Alox5ap	Dusp2	Ddx4	Ddx41	Desi1	Dapp1	Ermp1	Gimap7	Elavl1	Elmo1	Fam53b	Dhx15	Elk3	Dock8-as1	Enox1	Ctps2	F13a1	Daam1	Fbln5	Chek2	Cetn3	Klrk1	Alox5ap	Slc25a43		Fus		Scin
E2f8	Fam13b	Dgcr5	Folr2	Carf	Gmps							Clptm1l	Cxcr5	Dennd2b	Dnm2	Ddx4	Crot	Cxcl13	Psmb7	Ebna1bp2	Dmtf1	Dhx15	Dgcr5	Dennd5b	Esd	Glrb	Entpd3	Eloa-as1	Fbxl17	Dlg4	Elmod1	Dzip3	Eps15	Cyb561d1	Fan1	Dazl	Fhit	Coch	Cfb	Lamp1	Psmb7	Kiaa1107		Grin1		Kazald1
Ebi3	Fgf21	Dhcr7	Gabbr1	Casp9	Gramd1a							Cntn2	Cyfip2	Dpep3	Dppa2	Dlgap4	Cryz	Dapk1	Bcl6	Ehd1	Dscam	Dhx16	Dhcr7	Dok2	Etv4	Gm2a	Ermap	Entpd5	Fcho2	Dlgap2	Fam200a	Ebln3p	Ets2	Dhrs7b	Fbln5	Dhcr24	Foxj3	Cpm	Chd6	Lilrb1	Bcl6	Loc286467		Kad4		Fosl2
Ednra	Flad1	Dock6	Gadd45g	Castor3	Grina							Cntn6	Cys1	Dtx2	Dusp2	Dnajb1	Ctsa	Dlx2	Plscr1	Ell2	Dusp2	Dido1	Dock6	Dpp6	Fat1	Gpr18	Ess2	Exoc1	Flvcr2	Dnajb5	Fas	Epb41l3	Exosc5	Dnaja3	Fcmr	Dph2	Foxo3	Crip1	Chmp1b	Loc100190986	Plscr1	2002-09-01		Arvc		Mxi1
Eif2s2	Frat1	Dock9	Galc	Ccdc148	Gtse1							Corin	Dda1	Edn2	E2f8	Dpcd	Cul4b	Dvl3	Entpd1	Emid1	Ece2	Dmac1	Dock9	Dsg1	Fbxo16	Gpr65	Exoc1	F2rl3	Fmnl2	Dnttip2	Fastk	Ercc5	Ext1	Dnajb4	Fhit	Dtx4	Fpr1	Cstf2	Chn2	Lpxn	Entpd1	Tcp11l2		Camkv		Pde4b
Endod1	G3bp1	Dop1a	Gas7	Ccdc198	Hjurp							Cpeb2	Ddr2	Eef1b2	Eif3b	Efna4	Dag1	Dyrk1b	Il4ra	Endod1	Ehd1	Dnajc9	Dop1a	Dusp1	Fbxo17	Gprc5b	Fam117a	Fam168a	Fnbp4	Drd2	Fau	Ext1	F12	Dock7	Foxo3	Eif4a3	Gab2	Ctsa	Chst12	Lsp1	Il4ra	Nfe4		Ragp1		Clcf1
Epsti1	Galc	Dot1l	Gca	Ccdc30	Hspa9							Cpq	Ddx4	Eif2s1	Enc1	Elapor1	Dld	Egr3	Pim2	Epsti1	Eif2s1	Eif3f	Dot1l	Egr4	Fign	H19	Fam193b	Fam193b	Frmd7	Dyrk2	Fgd6	Fads1	Fam118a	Dyrk2	Fut4	Emp3	Gabpb1	Ctso	Commd3	Malt1	Pim2	Tmlhe-as1		Flot1		Pxdc1
Etv3	Gclm	Dusp10	Gh1	Ccdc57	Iqgap3							Crot	Dipk1b	Eloc	Entpd1	Elof1	Dnm3	Elf2	Atp8b4	Etnk1	Elf3	Fam162a	Dusp10	Emp1	Fis1	Hexb	Fam86b1	Fastk	Fut8	Dyrk3	Fkbp11	Fam111b	Fam241a	Eed	Fyn	Endod1	Gadd45a	Ctsw	Cox6b1	Matn3	Atp8b4	Znf660		2009-09-01		Klf4
F7	Gid8	Dyrk2	Gls	Ccl28	Kif20a							Csf2rb	Dnajb1	Elovl3	Epc1	Emc7	Ebp	Ell2	Atp6ap1	Ets2	Elmo1	Fau	Dyrk2	Epb41l4a	Fosl2	Hint3	Fam89b	Fbxo46	Gas2l1	Ecd	Fkbp14	Fam126a	Fbxo15	Egr3	Gab2	Entpd1	Gls	Daam1	Cox7b	Mccc2	Atp6ap1	Erv3-1		Cp46a		Lpar1
Fbxw11	Gmds	Dyrk3	Gorasp1	Ccnd2	Kif3c							Ctla4	Dnajb11	Enam	Evi5	Ergic2	Edem3	Endod1	Ifitm2	Exoc6	Epha1	Ftsj1	Dyrk3	Esr1	Gar1	Ier5l	Fdxr	Fn3krp	Ggcx	Eif4a1	Fmo9p	Fam229b	Fcrla	Elp6	Gadd45a	Epha4	Gnaq	Ddb2	Cox7c	Mfi2	Ifitm2	Prmt5		Prp19		Cd14
Fgf18	Gmps	Ecd	Grsf1	Ccr9	Knl1							Cxorf38	Dnajc1	Enpp1	Exoc7	Esd	Eef1akmt1	Enkd1	Hist1h4f	Eya1	Epsti1	Fuom	Ecd	Fdft1	Gclm	Ifnb1	Fis1	Fnbp1	Ggn	Enosf1	Fmr1nb	Fbxw12	Filip1l	Epb41	Gbp1	Exoc3	Gng11	Dlg3	Crip2	Mical2	Hist1h4f	Mgst1		Tr112		Zfp667
Fhl5	Gnat3	Eif2b2	H2ac6	Cd200	Kptn							Cyp1a1	Dspp	Epx	Fam98a	Fabp7	Efl1	Ereg	Bcl3	Fabp3	Ets2	Gadd45gip1	Eif2b2	Fdps	Gjb5	Igfn1	Fn3krp	Fto	Gpr150	Eps8l1	Fn3krp	Fcar	Fkbpl	Epb41l5	Gja5	Fam153b	Gns	Dlgap5	Crsp2	Mn1	Bcl3	Magix		Matr3		Wwc1
Flnc	Gng10	Eif4a1	H2bc12	Cdc42bpg	Ksr1							Dapp1	Dtx2	Fabp2	Fcgr1a	Fbxw11	Elovl5	Fabp6	Ceacam10	Fbln5	Fabp3	Gas2	Eif4a1	Fgf2	Gnl3l	Ikbke	Fnbp1	Fut8	Gps2	Ercc1	G3bp2	Fitm1	Foxd2	Fam135b	Gls	Fbxw4p1	Gucy1a1	Dna2	Csnk2b	Mpzl2	Ceacam10	Fcgr2a		Nos1		Cass4
Foxd1	Gpd1l	Fam66d	H2bc21	Cdk6	Larp1							Dennd4c	Dusp11	Fcgr2b	Fkbp7	Fer	Elovl6	Fam98c	Scarb2	Fbxw11	Faslg	Gclm	Fam66d	Fgf4	Gpatch4	Il12rb2	Fto	Fxr1	Gtf3c2	Etnk1	Gapdh	Flacc1	Fuca1	Fam167a	Gnaq	Fchsd2	H1-2	Dpy19l1	Csrnp1	Mycbp2	Scarb2	Fcgr2a /// fcgr2c		Atg7		Il1r1
G3bp2	Gspt2	Fcgr2c	H2bc5	Cdkn1a	Linc00839							Dip2b	Dusp16	Foxi1	Fmc1	Fgf7	Emc2	Fdft1	2610528e23rik	Fgf4	Fbrs	Gde1	Fcgr2c	Fgf6	Grk3	Il18rap	Fzd1	Fzd3	H6pd	Fam3c	Gdap1	Fmn1	Fyttd1	Fam98b	Gng11	Fer	H2ac6	Dpy19l2p2	Ctsw	Myl12a	2610528e23rik	Ncoa7		Pcbp3		Dnah2
Galr3	Gstm3	Fggy	H3c4	Cds1	Lmnb1							Dis3	Dusp26	Foxp1	Frmd8	Fgl2	Enpp1	Fign	Slc30a4	Flg	Fbxw7	Glmp	Fggy	Flnb	Gss	Ipcef1	Gde1	Gdi2	Hipk4	Fam83e	Glb1	Fzr1	Gcnt1	Flt1	Gns	Fst	H2bc21	Dtx4	Cxcl6	Myo10	Slc30a4	Vmp1		La		Cd207
Gatad2a	H1-2	Fsd1	Habp4	Cfap69	Lrrc8c							Dmxl1	Dyrk1a	Fscn1	Fuom	Frrs1	Ermp1	Foxb1	1110012l19rik	Flnb	Fkbp1a	Gnpnat1	Fsd1	Fmo6p	Gstk1	Isca2	Gga1	Glce	Hivep2	Faslg	Gs1-24f4.2	Gcom1	Glrx5	Gclc	Gpr171	Gale	H2bc5	Dzip3	Cxcr4	Nid1	1110012l19rik	Znf677		Mecp2		Sik1
Gatad2b	H2bc21	Gas1	Hbp1	Chdh	Map3k20							Dpp3	Ece2	Gabrb2	Gabrd	G3bp2	Faf1	Gabrd	Cd244	Fmod	Frmd6	Gtf3c2	Gas1	Fosb	Gxylt2	Itm2b	Ggct	Gnb5	Hspb3	Fbrs	Gusbp1	Gk3p	Gnb4	Gfm1	Grb14	Garre1	H3c10	Eif4a3	Cyp1a1	Nup98	Cd244	Wdr1		Myh9		Stat4
Gca	H2bc9	Gata2	Hck	Chl1	Mcm4							Dyrk3	Egfr	Gars1	Glb1l	Gch1	Fam111a	Gch1	Selplg	Fnbp4	Fryl	Haus4	Gata2	Foxp3	Hdac4	Ivd	Ggnbp2	Grk5	Igfn1	Fbxo28	Gusbp5	Gna11	Gng3	Gk5	Gsn	Gcnt1	Hcp5	Emp3	Cyp1b1	Oas2	Selplg	Loc100996253 /// ncl		Ethe1		Pde3b
Gcc1	Hbd	Gcm1	Hcp5	Chl1-as2	Micall1							Efemp2	Eif2s1	Gcnt3	Gpr34	Gclc	Fancg	Gdpd1	Gm885	Fundc2	Fst	Hla-dma	Gcm1	Fscn1	Higd2a	Jak1	Glce	Gstk1	Ikzf3	Fcgr2c	Haus8	Gnb4	Gng5	Gmnc	Gucy1a1	Gga2	Herc4	Ephx2	Ddr1	Oas3	Gm885	Ndrg1		Ptbp2		Pde4d
Gfpt1	Hdac2	Gdap2	Hdac9	Ckmt1b	Mki67							Efhd2	Eif2s2	Gdf9	Grp	Gde1	Fkbp9	Ghrl	Ano10	G3bp2	G3bp2	Hnrnpl	Gdap2	Gadd45a	Hsd17b7	Kcna2	Gorasp1	Helz	Il1a	Fgf4	Id3	Gpx5	Gprc5a	Gspt2	Gypc	Gldc	Hif1a	Eri2	Dlg3	Osbpl10	Ano10	Ldha		Glpk		Trf
Gk	Heatr1	Gimap4	Hexim1	Clcf1	Mllt11							Eif2s2	Emp1	Ggact	Hdac6	Gdf15	Flna	Ginm1	Napsa	Gbp2	Gbp2	Hoxa1	Gimap4	Garem1	Ift122	Kcnmb1	Gphn	Hint1	Il2ra	Fgl1	Idnk	Gs1-600g8.3	Gtpbp4	Gxylt1	H2ac6	Gls2	Hlx	Espl1	Dnmbp	P2rx5	Napsa	Dnajb1		Pitm1		Osm
Gpn2	Hexim1	Gjb5	Hhex	Cldn12	Mta3							Elavl1	Enkd1	Gli3	Heatr5b	Gk2	Fuca2	Gjd2	Snx24	Gch1	Gbp4	Ice2	Gjb5	Gas1	Ift22	Klhl3	Gria2	Hmgn3	Insyn2b	Flt1	Ifi30	Gulp1	Gucy1a1	Gys1	H2bc12	Gm2a	Hmces	Fam153b	Dtx3	Padi2	Snx24	Sparc		Dx39b		Flrt3
Gtpbp2	Hic1	Gls	Hla-dmb	Cldn4	Mthfd2							Elovl2	Epsti1	Gnas	Hells	Gng11	Gcg	Glyctk	Bhlhe40	Glcci1	Gca	Ifi30	Gls	Gas8	Il17a	Ldlrap1	Grk5	Hnrnpul1	Ip6k2	Frmd4b	Il12rb1	Gvqw3	Gxylt1	H3-3b	H2bc21	Gnaz	Hoxa10	Fanca	Dusp1	Pcsk7	Bhlhe40	Ctsd		Tpr		Tgm2
Hat1	Ifrd1	Gpm6a	Hla-e	Cldn7	Mzt2a							Erc1	Fscn1	Gnmt	Hes5	Grb2	Gsr	Gna13	Hist1h2ab	Gnat2	Gfra4	Il6r	Gpm6a	Gjb5	Irf4	Lgmn	Hps4	Htra2	Itgal	Gabpa	Il6	H2ac8	H2ac6	H4c4	H2bc5	Gpm6a	Hoxa9	Fanci	Dusp6	Pde4b	Hist1h2ab	Dhcr24		Acs2l		Arhgap28
Hdac1	Il1rap	Gramd2b	Hlx	Clic4	Mzt2b							Eya2	Fzd5	Gnpat	Heyl	Gsdme	Gsto1	Gpank1	1810046j19rik	Gsap	Gk	Ipo4	Gramd2b	Gpm6a	Kcnab2	Lmbr1l	Htra2	Impact	Itpr1	Gata6	Ildr1	H2bc8	H2bc4	Hdhd2	H3c10	Gpr18	Iqgap2	Fchsd2	Ecd	Perp	1810046j19rik	Epas1		Tba8		Dgat1
Hinfp	Ing3	Grm6	Hmhb1	Clic6	Ncapg							F13b	Gap43	Gtf2e2	Hip1r	Gtf2ird2	Gtf2b	Gpr84	Ube2g2	Gtpbp2	Gna13	Kcnk13	Grm6	Gpr4	Kcnn2	Lrrtm4	Kdelr3	Jarid2	Kat6b	Gml	Inpp5a	Hemgn	H2bc6	Hhip-as1	Hcp5	Gpr65	Itga5	Foxm1	Ecel1	Pom121l8p	Ube2g2	Fkbp4		Shan1		Gm16062
Hk2	Ints9	Gsta3	Idh1	Clstn1	Ncaph							F5	Gbp2	Gzmm	Hmgn5	Gtpbp1	Hadh	Gramd1a	Tor1a	H2aw	Gng11	Ldlr	Gsta3	Gpsm3	Krt7	Ly9	Kiaa0100	Jup	Kdm3b	Gnl1	Inpp5f	Hnrnpa2b1	Hhip-as1	Hmgn3	Hhex	Gpt	Itpr1	Fst	Egr1	Ppp1r16b	Tor1a	Dek		Efhd2		Chd7
Hmga1	Irx4	H1-4	Ifngr1	Cnksr3	Necab3							Fam102a	Gbp4	Hcfc1r1	Hnrnpdl	Hk2	Has3	Gria2	Eif1b	Hcar2	Grhl2	Leprot	H1-4	Grpr	Lancl2	Mafg	Kif1c	Kazn	Kdm5a	Golt1b	Ints7	Ikzf2	Hip1	Hmmr	Hlx	Hck	Kcns3	Garre1	Ehd3	Ppp2r5c	Eif1b	Ccnd2		Nop56		Abcb1a
Homer1	Keap1	H3-3b	Ifrd1	Cntn4	Nes							Fam120b	Gca	Hesx1	Hoxb3	Hnrnpd	Haus4	Gsr	Lrrc8b	Hcn2	Gtpbp1	Limk1	H3-3b	Gstcd	Lrrc75a	Magea9	Kifap3	Kdelr2	Kdm5b	Gpr107	Itpripl2	Irf4	Hnrnpa2b1	Ift20	Hmhb1	Hdac9	Khnyn	Gas7	Eif2b2	Prg2	Lrrc8b	Rpl31		Api5		Adora2b
Hspa2	Kif25-as1	Heca	Ift20	Cobl	Nop16							Fam20b	Gcg	Hivep1	Hs6st1	Hps4	Hdac6	Gstz1	Surf4	Helz2	Hace1	Lsm3	Heca	Gstm5	Lyar	Map3k3	Kmt2d	Kif11	Klf3	Gucy2f	Jade3	Itgb3bp	Id2	Il2	Hoxa10	Hexa	Kif3c	Gchfr	Eif5a	Prkar1a	Surf4	Tspan3		Moes		Mmp19
Hspb3	Kit	Hpse	Il16	Cracdl	Npm1							Fam222b	Gde1	Hlx	Hspbp1	Hsd17b13	Heatr5b	Gtf2e2	5730471h19rik	Hnrnpul1	Helz2	Lsm4	Hpse	H4c6	Mavs	Mfng	Kpna6	Lpcat1	Klhl7	Hgc6.3	Jam3	Jun	Iglj3	Il21r	Hoxa9	Hla-dob	Klf10	Gla	Elf4	Prss23	5730471h19rik	Trim28		Raly		N4bp2l1
Ido2	Klhl21	Hspa13	Il4r	Cryz	Nsmaf							Fastkd5	Gfpt2	Hspa5	Igf2bp3	Htr2b	Herc4	Hace1	Ccdc56	Hook2	Homer1	Ltbp3	Hspa13	Haus5	Med30	Mir142	Kri1	Lpcat4	Klhl8	Hmg20b	Jmy	Kiaa1586	Igsf21	Ing5	Ifi44	Hoxb7	Klf7	Gnaz	Ep400nl	Pscdbp	Ccdc56	Cd9		Hp1b3		Slc16a3
Ier3	Kpna1	Idi2-as1	Impa1	Ctage9	Nup210							Fbxl20	Gfra4	Hyou1	Il7	Ift57	Hgsnat	Hba2	Nfam1	Htr5a	Hoxb9	Map4k4	Idi2-as1	Hbe1	Mfsd5	Mob3c	Limd1	Lrrc47	Klk10	Hspa9	Jun	Kif27	Itgam	Inka2	Ifna2	Icam3	Krt12	Gpm6a	Epb41l4b	Psd4	Nfam1	Cd99		Vglu2		Gpc1
Igsf8	Laptm4a	Il18	Itpr1	Ctsc	Nusap1							Fcgr1a	Gosr1	Il13	Ints11	Il6st	Hprt1	Hcar2	Mgst1	Htra2	Icoslg	Mbp	Il18	Hbq1	Mir188	Msl1	Lrch4	Lst1	Kmo	Hspb7	Kbtbd8	Klhdc8b	Itprip	Irs2	Igfbp7	Ifi30	Lcp2	Gpr18	Epdr1	Ptger2	Mgst1	Stom		Nolc1		Ifitm5
Il10rb	Ldha	Il1r2	Jade2	Cux1	Olfml2a							Fez2	Gpr137b	Inhbb	Ireb2	Inhba	Hscb	Hes2	Cyba	Ifnar1	Ids	Mdh1	Il1r2	Herc1	Mir302b	Myo1f	Lrrc1	Map3k3	Kmt2d	Icam5	Kif13a	Kmo	Jkamp	Iws1	Il2rg	Ifngr2	Lig4	Grk4	Ereg	Ptprc	Cyba	Rps29		Rl13		Sipa1l1
Il1rn	Linc01278	Ing3	Jrkl	Cxadr	Paics							Flot2	Gpr50	Jmjd6	Itgb1bp2	Jag2	Htr1d	Icam1	Prkcz	Ikbip	Ift172	Med22	Ing3	Hla-k	Mir592	Myo1g	Lrrc37a2	Mdc1	Kremen1	Idi2-as1	Klf10	Krt18	Kank2	Jag2	Impdh1	Ighd	Lilra2	Grk6	Etv4	Pts	Prkcz	Idh1		Zn512		Rrp1b
Inhbb	Lrig1	Itch	Kdm6b	Cyb561d2	Pcbd1							Flt3	Gspt1	Kcnd1	Krt34	Jak2	Ift80	Id2	Ifngr2	Il18bp	Igsf9	Mettl18	Itch	Hmgcs2	Mrpl27	Nav2	Lsm1	Mdfic	Lcp2	Il1r2	Krtap4-9	Krt222	Kcng3	Jazf1	Iqgap2	Il27ra	Lilrb2	Grn	Evl	Pura	Ifngr2	Rps16		Snta1		Timp1
Irgm	Lrrc42	Itih1	Klf7	Cyb5b	Pcgf1							Fuca2	Gucd1	Kcnmb1	Large1	Kcna6	Ippk	Ier2	Upp1	Il18rap	Il10ra	Mgat2	Itih1	Hnrnpm	Mrpl36	Ncoa2	Lsm14a	Med16	Leap2	Il6	Linc02867	Lbx1	Kiaa1958	Jchain	Itga5	Il4r	Lmo2	Gsdme	Fads3	Rab6a	Upp1	Dab2		Lmnb1		Hdac5
Itga4	Maf	Junb	Klhl18	Cyb5d2	Pclaf							Gabpa	Hcn2	Kdm5c	Lgals1	Kcnh7	Kbtbd2	Ier5	Surf1	Il1rn	Irf8	Mknk2	Junb	Hopx	Mrps11	Npc2	Maml1	Megf9	Lrig1	Il7r	Lmo4	Lhfpl1	Kif2a	Kdm1b	Itpr1	Il7r	Lrig1	Gucy1b1	Fam109a	Rgs1	Surf1	Anxa4		Lasp1		Pim1
Itpr1	Map11	Katnbl1	Kmo	Cyp4v2	Pea15							Gabra6	Hdac1	Krt35	Lgals8	Keap1	Kcnk13	Ifit1b	1810037i17rik	Irf8	Irgm	Mmp12	Katnbl1	Hr	Mrps14	Nrp1	Map3k4	Mief1	Ltb4r2	Kcnn3	Ltb	Linc00240	Kir2dl4	Kif27	Jade2	Inpp4a	Lst1	Hck	Fam49a	Rp6-213h19.1	1810037i17rik	Anp32b		Dlg3		Sdc1
Jak2	Map2k1	Kcnmb1	Kpna6	Dazap2	Pimreg							Galnt6	Hid1	Krt8	Lgals9b	Kin	Khk	Ik	Lsm10	Irgm	Isoc1	Mphosph9	Kcnmb1	Hspa12a	Mrps18b	Nxph1	Mdc1	Mis18a	Lyst	Kdm6b	Ly86	Linc00339	Klf8	Klhl14	Kcns3	Insl4	Man1a1	Hdac9	Fhl2	Rreb1	Lsm10	Nrep		Rhg35		Nnat
Keap1	Mctp1	Kcnn3	Krt35	Dbt	Pip4p2							Ggps1	Hinfp	Krtcap2	Lmbrd1	Klhl22	Kiaa1143	Ilk	Zdhhc3	Kcmf1	Itgb3	Mras	Kcnn3	Il6r	Mvb12a	Ociad2	Mea1	Mkks	Mbnl2	Khdc1l	Ly96	Linc00475	Klhl14	Larp1b	Kdsr	Irag2	Mapk8ip3	Hmgb3	Flj40330	Runx3	Zdhhc3	Sh3bgrl		Psd12		Ttc39b
Kitlg	Me1	Kdm6b	Lama5	Degs2	Polr3d							Gimap6	Hmga1	L3hypdh	Luc7l3	Klrk1	Kif13a	Inhba	Oat	Kcnd2	Jam3	Mrpl3	Kdm6b	Ints11	Mvd	Ostf1	Mga	Mllt3	Megf8	Kif25	Lypd5	Linc00518	Klhl2	Lgalsl	Klf10	Irf4	Mau2	Iapp	Gab2	S1pr1	Oat	Smarcc2		Eea1		Dgat2
Klf5	Med24	Khdc1l	Ldoc1	Diras3	Praf2							Glul	Htra2	Lama3	Magea11	Krt18	Klhl9	Jarid2	Igsf10	Kdr	Kat2b	Mrps2	Khdc1l	Irf7	Myo5b	Pacs1	Mief1	Mpi	Micu3	Lamc1	Maml2	Linc00909	Lhfpl2	Linc00476	Klf7	Irf5	Mdk	Irag2	Gabarapl2	Sec22c	Igsf10	Slc9a3r1		Wbp11		Gpr56
Klrk1	Mfap3l	Lhx5	Linc01138	Dlg1	Prc1							Gml	Igf1r	Lima1	Mapk6	Krtcap2	Krt10	Jmjd6	Clca1	Klrk1	Kcna6	Mttp	Lhx5	Itgav	Nfe2l2	Pcca	Mkrn2	Mrfap1l1	Miga1	Leprot	Map3k20	Linc00926	Lilra2	Linc00487	Klhl9	Irs1	Med13l	Irf4	Gabpb1	Sgsh	Clca1	Oaz2		Caps2		Apbb3
Krtdap	Mkln1	Lmna	Lrp10	Dmtf1	Prr11							Gnaq	Il10rb	Luzp1	Mdh2	Ktn1	Limd2	Junb	A530023o14rik	Kptn	Kctd4	Myl6	Lmna	Izumo4	Nfu1	Pde4b	Mphosph10	Mrpl17	Mir449c	Lrif1	Mcm2	Linc01242	Linc02603	Linc00665	Laptm4a	Itgb2	Mef2c	Irs1	Gbp2	Sh2b3	A530023o14rik	Igf2r		Hpln4		Rab11fip1
Lap3	Mlh1	Lrif1	Ly75	Dnai4	Ptp4a3							Golga5	Iqgap1	Ly75	Meis3	Kyat3	Ltbr	Kcnh2	Meg3	Lcn8	Keap1	Nabp2	Lrif1	Jam3	Nicn1	Pgap1	Mpi	Msrb2	Mir455	Mad1l1	Mcoln2	Linc02145	Lrrc58	Linc00917	Lcp2	Izumo4	Mlxip	Itgb3bp	Gem	Siglec7	Meg3	Wdr77		Copg1		Gas2
Lgals8	Mocs3	Lrrc3	Lyst	Dnaja4	Pttg1							Golga7	Irs1	Lyst	Mepce	Lap3	Ltc4s	Kif1a	Eno1	Lrrc41	Krt1	Ncaph	Lrrc3	Kansl1l	Nol12	Pigv	Mpig6b	Mterf3	Mylip	Magea1	Mdfic	Mamdc2	Luzp1	Linc01541	Lgals3bp	Jag1	Mme	Jag1	Gimap2	Slc26a4	Eno1	Gsto1		Tif1b		Avpi1
Lmbr1l	Mrpl11	Ltbp2	Lyz	Dnajc1	Pvt1							Gpatch2	Kif9	Malat1	Mettl6	Larp4b	Lztr1	Klf1	Fgr	Map3k12	Ktn1	Ncbp1	Ltbp2	Kcnj12	Npr3	Pitpnc1	Mrpl35	Mtmr3	Mylk3	Magoh2p	Mef2c	Mansc1	Lyrm4	Lipa	Lilra2	Kif21b	Mmrn1	Kif14	Gimap4	Slc2a1	Fgr	Ctsc		Atad3		Cebpb
Lmo4	Mrps10	Magea1	Magi2	Dnajc16	Pwwp2a							Gpr50	Klrk1	Map2k1	Mfsd1	Lct	Map3k12	Klhl25	Rnf160	Mapkapk2	Lcat	Ncor2	Magea1	Kcnj5	Nup37	Pitpnm1	Mrps11	Mtmr4	Nkpd1	Matk	Mif4gd	Mettl18	Maged1	Lipj	Lilrb2	Klf9	Mpp1	Kif20b	Gng4	Slc2a3	Rnf160	Tomm70a		Tim22		Agpat9
Lnx1	Msc	Map4k5	Map3k8	Dpp4	Rab15							Grik5	Laptm4b	Map2k6	Mrpl11	Lhx2	Matr3	Klk4	Nucb2	Mep1b	Lpp	Ndufa11	Map4k5	Kcnj9	Osgep	Polr1b	Mrtfb	Myh1	Npas2	Mefv	Mnda	Mmut	Mageh1	Lrpprc	Lipa	Kmo	Mpped2	Kmo	Gng7	Tcf4	Nucb2	Id2		Lmna		Itprip
Lrrc23	Msra	Mapkapk2	Mettl7a	Dsg2	Rapgef4							Grk6	Mapk11	Mau2	Mrpl48	Lipf	Mcee	Krtap13-2	Foxm1	Mid1	Lta	Ndufa13	Mapkapk2	Kcnmb1	Ovol3	Prkaa1	Msh6	Myo1d	Nr1h5p	Mex3c	Mroh2b	Mogat1	Mapk8	Ly86	Lipt1	Lama5	Mrc2	Kpna6	Hbb	Tfpi	Foxm1	Anxa2		Set		Thap6
Lrrn1	Mt1x	Marchf5	Mgll	Dync2li1	Rbis							Grwd1	Mcmbp	Mbl2	Msh3	Lmo4	Mcub	Ldhc	Bloc1s2	Mitd1	Lztfl1	Ndufab1	Marchf5	Kcnn1	Pabpc1	Prkch	Nat10	Nap1l4	Nrip2	Moap1	Mrps21	Mpc1	Mbnl2	Mageh1	Lmo2	Lck	Mrps14	Lama5	Hdac5	Tiaf1	Bloc1s2	Ier3		Evl		Bc030867
Lztfl1	Mtpap	Marchf7	Mia3	Dynlt1	Rftn1							Gsc	Meltf	Med11	Msl1	M1ap	Mef2a	Luc7l3	1110002n22rik	Mitf	Lzts2	Nedd8	Marchf7	Kcnq3	Paqr7	Ptpn22	Nckipsd	Nars1	Ogt	Mxd1	Msmo1	Mras	Melk	Map6	Lrig1	Lig1	Mtmr3	Lyn	Hdac7	Tnfrsf25	1110002n22rik	Itga6		At2b4		Pdpn
M1ap	Mtrr	Meis3p1	Mios	Edar	Riox2							H1-8	Mitd1	Mitf	Mt3	Magi2	Mepce	Marcksl1	Gm3258	Mob1b	Mal	Nfil3	Meis3p1	Kiaa1614	Parp16	Pvt1	Ncoa6	Nat10	Orm1	Myog	Msto1	Mrpl51	Mgat4a	Mrpl19	Lrrc15	Ly86	Mxi1	Mapk1	Hemgn	Tra2b	Gm3258	Timp1		Fbll1		Cd83
Macroh2a1	Mxi1	Mex3c	Mknk1	Edil3	Rnaseh2a							Hdac2	Mpzl2	Mmp23b	Naa40	Mbd6	Mindy1	Mark3	Tmem176a	Mrpl21	Mapk6	Nhp2	Mex3c	Klf2	Pbld	Pyhin1	Nde1	Ndufc2	Osbp	Nabp1	Mtr	Mtss1	Mia2	Mtap	Lrrc41	Lyn	Myb	Marcks	Hgsnat	Trh	Tmem176a	Gys1		Drg2		Smox
Maged2	Myh1	Mkrn7p	Mob4	Ednrb	Rpia							Hectd1	Mrpl14	Mobp	Nampt	Mc1r	Mrpl48	Mark4	Slc36a1	Ms4a6a	Mapkap1	Nlk	Mkrn7p	Krt75	Pde12	Rapgef4	Ndst1	Nipal3	Otud3	Napg	Myh8	Mxi1	Mphosph9	N4bp2	Lst1	Mast3	Mylk	Mast3	Hhex	Tspyl4	Slc36a1	Dlg5		G3bp2		Procr
Map3k5	Ncapg2	Morf4l2	Morc3	Efcab6	Rpl8							Hexa	Mrpl22	Mos	Ncln	Mdfic	Mrpl51	Mc1r	Aa467197	Msl2	Mapkapk2	Nme3	Morf4l2	Krt85	Phgdh	Rasa3	Neil3	Nlrx1	Parp8	Ncs1	Naa50	Mylip	Mrnip	Nap1l3	Ltb	Mettl7a	Myrf	Mc5r	Hlf	Ufd1l	Aa467197	Pnp		Kcc2d		Plekhg2
Mapk10	Nkapd1	Ncln	Mpped2	Elf3	Rps9							Hnrnpk	Mrpl39	Mrps15	Ncoa2	Mecp2	Muc1	Med25	Plac8	Mtmr14	Mark4	Nolc1	Ncln	Krtap5-8	Pigq	Ripor2	Nme6	Npipa1	Parvb	Nfe2l2	Nbpf10	Nde1	Ms4a1	Nbr1	Lyz	Mical3	N4bp2l2	Mcl1	Hnrnpa3	Usp12	Plac8	Ccnd3		Dgkq		Cmip
Mcmbp	Nrg1	Ncs1	Mtmr3	Epha1	Rrm2							Hspb3	Ms4a6a	N4bp1	Ndufs2	Miox	Myl12b	Meis3	Lipg	Myh1	Mbd2	Nsmf	Ncs1	Large1	Pilra	Rnf13	Nqo2	Orc1	Pdpk1	Ninj1	Ndfip1	Ndufv3	Mt1f	Ndfip1	Map4k4	Mmp17	Ndrg1	Melk	Hnrpdl	Ywhaz	Lipg	Nipsnap1		Gstt3		Cgnl1
Mdfic	Nup54	Neu3	Mtss1	Epn2	Sae1							Htr2b	Mtf1	Naa38	Nelfa	Mmp17	Myo5a	Midn	Pcp4l1	Myo1d	Mcmbp	Nucb1	Neu3	Limch1	Plk2	Rnf149	Nsfl1c	Orc6	Pgbd1	Npc1	Nfs1	Nexn-as1	Mthfd2l	Ndufb5	Mapk8ip3	Mpp6	Nedd4	Mfge8	Hoxa9	Zbtb6	Pcp4l1	Mybl2		Rab9a		Rnf183
Meltf	Opn3	Neurod1	Mx2	Eps8l1	Scnm1							Htr5a	Nae1	Ncaph2	Net1	Msln	Myoz1	Mis12	Mrps18c	N4bp1	Mmp14	Nufip1	Neurod1	Lman1l	Pomp	Rpl13a	Nup107	Pacsin2	Pi4k2a	Nr3c1	Niban1	Niban3	Myb	Nifk	Mef2c	Ms4a1	Nfya	Mgll	Htra3		Mrps18c	Tubg1		Syfa		Pitpnc1
Mep1b	Oxld1	Nfkb1	Mxi1	Evc	Sgo2							Ice2	Ndrg2	Ndp	Neu2	Mtmr14	Ndufb2	Mrpl4	Rbm47	Nampt	Mrps28	Oaz2	Nfkb1	Lypla2	Ppp4c	Rprd2	Nup50	Pcmtd2	Pias2	Nsmf	Nipa1	Nphp3	Mzf1-as1	Npeppsp1	Mlxip	Mthfd1	Npas3	Mmd	Icsbp1		Rbm47	Epb41l2		Roa3		Hsd11b1
Mmp2	Oxsm	Nfkb2	Myo1c	Exo5	Sh3kbp1							Idh1	Nectin2	Nfil3	Nfe2l2	Mtmr7	Ndufv2	Mtmr7	Muc1	Neu3	Mt2a	Odc1	Nfkb2	Magi1	Prdx4	Rundc3b	Orc5	Pcyox1l	Ppfibp2	Nt5e	Nlrc3	Nudt12	N4bp2	Nrep	Mmrn1	Mtmr1	Nr3c1	Mrtfa	Ier2		Muc1	Cd14		Neua		Gatsl3
Mob4	Pabpc4	Nfkbib	N4bp2l2	Exoc4	Shmt2							Ido2	Nemf	Nme2	Nkain1	Mx2	Nedd8	Myh7	G6pdx	Neurl1	Mtdh	Opn3	Nfkbib	Mmp11	Prpf31	S100a10	Pacsin2	Pdcl	Prkdc	Numb	Nme3	Nup210l	Nfyb	Ola1	Mpped2	Mtss1	Nrip1	Msh3	Ier3		G6pdx	Azin1		Tmeda		Antxr2
Ms4a6a	Paip1	Nrg1	Nfkbie	Ezr	Ska3							Ifitm2	Niban1	Npas1	Nog	Myog	Nefh	Myo5a	Pgd	Nif3l1	Mtfr2	Ormdl2	Nrg1	Mpped2	Psma5	S1pr4	Pagr1	Pfas	Prrc2c	Nup58	Nqo2	Oard1	Nlrp3	Or7e87p	Mxi1	Mtx2	Oas2	Mtcl1	Ifit2		Pgd	Rnf13		Bt3l4		Tnfsf14
Msln	Pdpr	Ntrk1	Nts	Faah	Slc16a1							Ifngr1	Ninj1	Oga	Nop10	Myorg	Nek7	Nck1	Anxa1	Npr1	Mtmr7	Osbpl2	Ntrk1	Mrpl28	Psma7	Scaper	Paqr4	Phkb	R3hdm1	Odr4	Nt5dc1	Or10a4	Nptx1	Papss1	Mylk	Nadk	Or7a5	Mtmr1	Ifitm1		Anxa1	Sh3bp5		Clus		Nod2
Mtfr2	Peli2	Nup58	Oas1	Faim	Slc16a1-as1							Ift88	Nrg4	Ophn1	Nop9	N4bp1	Nhlh1	Nedd1	Clec5a	Npy1r	Mtpn	Pag1	Nup58	Ms4a6a	Psmb3	Scml4	Parp2	Pigh	R3hdm2	Or2b6	Nudcd3	Pdcd4-as1	Npy	Park7	Ndrg1	Ndufs5	P2ry14	Nadk	Ifitm2		Clec5a	Tbl1x		Zfr		Mpp7
Ndp	Pgk1	Or1f2p	Oas2	Fam110b	Slc35g2							Il12rb2	Nsun4	Otc	Npdc1	Ncor1	Nsmf	Ninj1	Nfil3	Nr2f1	Mutyh	Pcnx3	Or1f2p	Mvk	Psmb6	Sec24c	Pcyox1l	Pik3r3	Rab5a	Osr2	Osbp2	Plxna1	Odf2	Parp16	Nfya	Ndufs7	Pde4b	Ncapd3	Ifitm3		Nfil3	Mpzl1		Plcx3		Acsbg1
Nos2	Phf3	Or7a5	Optn	Fam81b	Slc39a14							Ilrun	Nudt9	P2ry14	Nploc4	Neu3	Nthl1	Nmt1	Ppil5	Nr3c1	Mzf1	Pde1c	Or7a5	Mybpc3	Psmb8	Selenop	Pcyt2	Pim2	Rprd2	P2rx2	Osbpl3	Prdm7	Ogfrl1	Paxbp1	Nr3c1	Nfil3	Pdlim7	Nek2	Ifna5		Ppil5	Il13ra1		Pkha6		Gpr132
Notch1	Pld1	Pdlim1	Patz1	Fat1	Slc7a1							Ipp	Ociad1	Pard6a	Ocel1	Nfkbia	Nucb1	Nop58	Gm9958	Nub1	Nae1	Pdxk	Pdlim1	Myh10	Pth2	Sell	Pds5b	Pip4k2b	Rreb1	Pam	Pag1	Prkaa2	Parp1	Paxip1	Nrip1	Nrgn	Pecam1	Nkx2-8	Ift88		Gm9958	Ctdspl		Snx16		Odc1
Ociad1	Pnrc2	Pfkfb3	Pbxip1	Fbxl16	Smc4							Itgb3bp	Pacc1	Paxbp1	Pex19	Nr5a2	Nucb2	Npr2	Tpx2	Nudt9	Nampt	Pepd	Pfkfb3	Myl4	Rab33a	Sfxn2	Pik3c2b	Pkd1p1	S100a14	Per1	Pcyox1	Prkce	Pax8-as1	Pca3	Or7a5	Nt5e	Pfn2	Nrgn	Il10ra		Tpx2	Sec63		Ap1b1		Ccr7
Otc	Ppih	Phf10	Pcmtd2	Fgf14-as2	Snrpa							Jak1	Pacrg	Pcbd1	Pgpep1	Nub1	Ogg1	Nsdhl	Rab2b	Nupr1	Nanog	Pgd	Phf10	Nefh	Rfc2	Shisa5	Pik3r3	Pkd1p6	Sema7a	Pfkfb3	Pdlim1	Proser3	Paxbp1	Pi15	Os9	Nup160	Pglyrp1	Nt5e	Il2ra		Rab2b	Cd55		H2ay		Cystm1
Padi3	Ppp3r1	Phlpp2	Pdia5	Fhdc1	Spag5							Kcnab2	Palld	Pcsk4	Pip5k1c	Nudt3	Omd	Nup58	Socs3	Ostf1	Necab3	Pip4k2a	Phlpp2	Neu3	Rhoa	Slc16a6	Plau	Pkp4	Sh3kbp1	Phf10	Pik3ap1	Prr11	Paxip1-dt	Piwil4	P2ry14	Nup210	Plscr1	Nup160	Il4r		Socs3	Cpd		Kap3		Plekhg3
Palld	Prcc	Pi3	Phf21a	Fhl1	Spdl1							Kdelr1	Pc	Pde4b	Pla2g15	Nup88	Pald1	Nupr1	Hpse	Pag1	Nkg7	Pno1	Pi3	Neurod1	Rnaseh2a	Slc20a1	Plin3	Plcb1	Skil	Phf2	Pik3r2	Rab30	Pclaf	Plcxd1	Pbxip1	Pcdh9	Plxnb2	Nup210	Il8		Hpse	Alcam		K1468		Bend4
Pard3b	Prmt5	Piga	Plec	Flj37453	St3gal5							Kiaa0513	Pcnx1	Penk	Pnpla8	Nupr1	Park7	Otor	Hp	Palld	Nos2	Pofut2	Piga	Neurod6	Rnasek	Slc27a6	Pms2p5	Pms2p2	Slc6a11	Picalm	Pkhd1l1	Rapgef4-as1	Pik3cd	Polr2h	Pcmtd2	Pdgfra	Ppp3cc	Oip5	Impa2		Hp	Ppp1r12b		Syym		Bzrap1
Parg	Prorp	Pitpna	Pnisr	Fmo5	Stambpl1							Kif13a	Pde6d	Pip5k1b	Ppif	Pawr	Pdcl	P2ry2	C3	Parp12	Nrg3	Polr1e	Pitpna	Nkx3-1	Rnf187	Slc29a2	Polr2b	Polr2b	Sltm	Pik3c3	Pkig	Rasa1	Pip5k1b	Ppat	Pde4b	Pdlim1	Prmt2	Pdia5	Impdh1		C3	Nasp		Ilf3		Fos
Pc	Psmb5	Pknox2	Pou4f1	Fndc3a	Tfap2a-as1							Kif21a	Pfdn2	Plekha1	Prdm5	Pdk3	Pdk4	Pacrg	Slfn2	Parp3	Ntsr2	Prkag1	Pknox2	Nkx3-2	Rpl13	Slc50a1	Pop4	Polr3b	Smarca4	Pla2g4c	Plaat4	Rasa3	Pltp	Prmt9	Pde9a	Peg10	Psd3	Pdlim1	Ip6k2		Slfn2	Aldoc		If2a		Ier3
Pcdh8	Ptgs2	Plekhm1	Ppp1r16b	Foxc1	Tgfb1i1							Krt13	Pgf	Pop4	Prkag1	Pdlim4	Pdyn	Pcdhac1	1500003o03rik	Parp4	Nub1	Prps2	Plekhm1	Nle1	Rps27l	Slfn5	Ppat	Pop4	Snx19	Plagl1	Plag1	Rbm5	Pnisr	Proser2	Pecam1	Pip5k1b	Ptpn12	Pex2	Itga5		1500003o03rik	Aldh3a2		Tln1		Gpr97
Pcdhb10	Pttg3p	Pmfbp1	Ppp1r2	Foxp2	Tgs1							L2hgdh	Phldb1	Pop7	Prxl2a	Pip5kl1	Pes1	Pcnx1	Cc2d2b	Pcnx1	Oaf	Ptdss2	Pmfbp1	Nppc	Scn3b	Smap2	Ppfia3	Pou2f1	Spg11	Pmch	Plcg2	Rbms1	Pold1	Prrc1	Pfn2	Pkia	Ptpre	Phex	Itgal		Cc2d2b	Pltp		Cox1		Ankrd33b
Pdzk1	Qrich1	Pomp	Prkcb	Foxp4	Tk1							Lair1	Pi4k2a	Ppdpf	Psmb2	Plekhg2	Pfn1	Peli1	2310014h01rik	Pde4b	Oas2	Pth1r	Pomp	Nudcd3	Sdr16c6p	Spg11	Ppp1cc	Ppm1h	Ssx9p	Pnrc1	Plekhb1	Rftn1	Ppp1cc	Psmg3	Phf21a	Plch2	Pxdn	Phtf2	Itgam		2310014h01rik	Slc39a6		Rla1		Nid2
Phc2	Rab4a	Porcn	Psd4	Frem2	Tnfrsf9							Lap3	Pik3ap1	Ppp1r2p1	Psme3ip1	Plin3	Phpt1	Penk	Bc055004	Pdk3	Olr1	Pum3	Porcn	Or1f2p	Serinc3	Ssh2	Ppp5c	Prdx3	Stim2	Porcn	Plekho2	Rnaseh1	Pten	Ptbp2	Pip4k2b	Ppp1r16b	Rab11fip5	Pip5k1b	Junb		Bc055004	Plin3		Rs4x		Prune
Phox2a	Rala	Pou4f3	Psen1	Fut3	Top2a							Lbr	Pim1	Prelid1	Ptges	Pml	Pik3c2a	Pibf1	Ccnb2	Pdzd3	P2ry14	Pwp2	Pou4f3	Or2b2	Sinhcaf	Stard5	Prim1	Prim1	Strip1	Pou6f2	Plxnc1	Rp9p	Pth2	Pym1	Plscr1	Prkcd	Rabac1	Pkia	Kcne3		Ccnb2	Blmh		Sng1		Tubb4a
Pkdcc	Rbpj	Ppard	Psen2	Fut6	Tpd52							Letmd1	Pip5kl1	Prkd1	Ptprj	Polb	Pimreg	Pink1	Ngp	Pex13	Pafah1b2	Qrsl1	Ppard	Pard6b	Sipa1l1	Tagln2	Prmt2	Prkaca	Supt7l	Ppard	Pnpla3	Rps20	Ptpre	R3hdm1	Plxnb2	Ptpn18	Rag1	Plagl1	Kcnh2		Ngp	Mvp		Ddi2		Havcr2
Plac8	Rcbtb2	Ppp1r11	Ptpn2	Fzd1	Tpx2							Limk2	Pitpnb	Prom1	Qrsl1	Pou3f3	Pip4k2a	Plaa	Mxd1	Pex26	Palld	Rad17	Ppp1r11	Pax1	Slc19a1	Tanc1	Prr13	Psma4	Syn3	Ppfibp1	Pou6f1	Satb1	Rap1gap2	Rac2	Pnisr	Ptpn21	Ranbp6	Plcl2	Kif15		Mxd1	Ppp2r5a		Kif3a		Slc25a33
Plagl2	Rcn1	Ppp6c	Rabgap1	Galnt11	Trim28							Lrp1b	Pkp4	Psca	Rab5b	Ppdpf	Pno1	Plk4	Bloc1s2	Pik3ap1	Parp4	Ramp1	Ppp6c	Pcdhb8	Slc25a5	Tbx6	Psmg2	Psmf1	Syne1	Ppme1	Ppp1r13b	Scn3a	Rcbtb1	Rad23b	Ppm1f	Ptpn22	Rapgef2	Plg	Klf11		Bloc1s2	Nup93		Ghc1		Gan
Plcg1	Rhoq	Pprc1	Rag1	Galnt3	Ttk							Lrp4	Pla2g2f	Ptprn2	Rabggta	Ppp1r15a	Poglut2	Ppbp	Anxa2	Plekhn1	Pdss1	Rars2	Pprc1	Pick1	Smim11a	Tecr	Ptpa	Psmg2	Synj1	Prdm1	Ppp1r36	Serpina1	Rell1	Ralgapa1	Ppp3cc	Ptpn6	Rdh11	Plk4	Lair1		Anxa2	Limk2		Flot2		Thbd
Pml	Rnd3	Pspn	Rassf8	Gatad1	Ttll6							Lrrc42	Plaat1	Rab40b	Rap1a	Prdx1	Pou6f1	Ppp1r15a	Ccnb1	Plpp1	Pdzk1ip1	Rassf2	Pspn	Pla2g6	Snrnp25	Telo2	Pudp	Ptpn18	Tapbpl	Prdm2	Prkcz	Setdb2	Rgs22	Rfc3	Prkci	Ptprk	Reck	Pmm1	Lck		Ccnb1	Lss		Itsn1		Phlda1
Polr3f	Rnf113a	R3hdm4	Rbm19	Gatm	Uap1							Lrrc59	Plagl2	Rad51b	Rbp3	Psma4	Ppp1cc	Prdm1	Ly6c1	Ppp1r15a	Pex13	Rere	R3hdm4	Pnliprp1	Snx16	Tent5c	Rab5if	Ptpra	Tbc1d10c	Prkcz-as1	Prorp	Shoc1	Rnft2	Rfpl3s	Prmt1	Ptprm	Retreg1	Pola1	Lcp2		Ly6c1	Tk1		Hacd3		Stk40
Ppp1r15b	Rraga	Rab3gap1	Relb	Gba3	Ube2c							Luc7l3	Plekhf2	Rb1cc1	Rbx1	Psmc2	Ppp1r18	Prom2	Wdr53	Ppp2r5a	Pglyrp1	Retreg2	Rab3gap1	Pnp	Sp8	Them5	Rabepk	Pttg3p	Tbc1d2b	Prlh	Psip1	Slc19a2	Rngtt	Rhobtb1	Prmt2	Pwp2	Rfx5	Pold1	Lgals9		Wdr53	Loc100506558 /// matn2		Kcc1a
Prkd1	Rtp4	Rbms1	Rfx5	Gipc2	Ube2s							Lyrm2	Pml	Rbbp7	Rnf2	Psme3	Prkag1	Prrx2	Nuf2	Procr	Phc2	Rexo2	Rbms1	Pou4f3	Spcs1	Tmem108	Rad17	Pudp	Tgm5	Prrc2c	Ptcd1	Slc1a4	Robo1	Rnaseh2c	Psd3	Rab29	Rgl1	Pom121l9p	Lilra2		Nuf2	Tceal4		Csn7a
Procr	Rundc3b	Reg1a	Rgl2	Gk5	Uhrf1							Magohb	Pou3f4	Rbm10	Rnf34	Psme3ip1	Prkch	Ptx3	S100a6	Psma4	Pigf	Rgl2	Reg1a	Ppfibp2	Srpk1	Tmem154	Repin1	Pwp1	Tmem131	Rabgef1	Pus1	Slc25a14	Rps6ka4	Rnf112	Ptger2	Rasgrp1	Rims3	Pou1f1	Lmo2		S100a6	Acsl4		Srsf7
Psmb8	Ruvbl1	Rel	Rgs16	Glb1l	Urb1							Mal	Ppp2r2d	Rdh14	Rplp1	Ptges	Prkra	Pxmp2	Ccdc12	Psmb9	Plagl2	Rgs19	Rel	Ppp1r2c	Stard3nl	Tmem185a	Reps1	Rab4a	Tnip1	Rapgef6	Rnf133	Slc25a45	Sec22a	Rpf2	Ptpre	Rfc5	Rnase2	Prim1	Loc283070		Ccdc12	Rxra		Sf3b1
Ptpn6	Sage1	Rgs17	Rgs6	Glod4	Wdfy2							Mcm3	Prickle1	Recql5	Sash3	Ptpn6	Qrsl1	Pygm	Hist1h2ak	Ptgs2	Plekhf2	Rnase4	Rgs17	Ppp2r5d	Thap11	Tnfaip8l2	Rin3	Rab5if	Tnrc6a	Rheb	Rnf168	Slc35e1	Senp5	Rsl24d1	Pxdn	Rgs10	Rnf103	Prim2	Ltbp1		Hist1h2ak	Cyp1b1		An32a
Ptpre	Sel1l	Rgs20	Rhobtb1	Glud1	Wdr76							Mcm5	Psma4	Rem2	Sdhc	Ptx3	Rab7a	Rab30	Ffar2	Rab8b	Plg	Rnf5	Rgs20	Prkag2	Thsd7a	Tnfrsf14	Riox1	Rabepk	Trappc9	Rnf10	Rnf8	Slc39a10	Sh2d3c	Runx1	Rab13	Rgs4	Rock1	Ptpn18	Ly6e		Ffar2	Atg9a		Pairb
Ranbp1	Sema4d	Ripply3	Rhoh	Gmds	Xpot							Metrnl	Ptpro	Rln1	Sel1l	Rabl6	Rarg	Rai14	Pomp	Rbm43	Pomc	Rnf7	Ripply3	Prodh2	Tifa	Tnfrsf1a	Rmi1	Rabif	Trpv6	Rnf19b	Rplp2	Slc40a1	Sh3pxd2a	Rxylt1	Rag1	Rhobtb1	Rybp	Ptpn21	Maff		Pomp	Mlxip		Rl6
Rbm43	Sergef	Rnd2	Ripor2	Gorasp1	Zgrf1							Mfn2	Rab32	Rnd3	Septin7	Rad23a	Rars2	Ranbp10	Ccnb1	Ror2	Ppig	Rpl12	Rnd2	Prr36	Tipin	Trap1	Rnf146	Rad17	Ttpal	Rpl23ap53	S100a10	Slc6a16	Skp2	Sacs	Ralgapa1	Rhoh	S1pr4	Ptpn6	Map2k1		Ccnb1	Svil		Pa1b3
Rbm8a	Serpind1	Rnf10	Rnase2	Gpbp1l1	Znf37bp							Mfsd5	Rab38	Rsph3	Sertad1	Rad51b	Rcsd1	Ranbp3	Rnf160	Rsad2	Ppp2r5a	Rpl30	Rnf10	Prr5	Tonsl	Trib2	Rnf31	Rad9a	Urb2	Rsrc1	Samsn1	Smim10	Slc16a14	Sh3yl1	Reck	Ripor2	Satb1	Rad51ap1	Map2k3		Rnf160	Gusb		Actn4
Rgl1	Sft2d2	Rtf2	Rnase6	Gpc6								Mgll	Ranbp17	Scin	Sertad3	Ranbp1	Rfc1	Rasa2	Itgam	Samd10	Prkcd	Rplp1	Rtf2	Psd4	Tpsb2	Tspy26p	Rnf4	Rangrf	Usp25	Rtf2	Sdhaf1	Smu1	Slc38a9	Skap2	Reep5	Rnase6	Scarf1	Raly	Matn2		Itgam	Slc30a9		Hnrpl
Rhog	Sftpa2	Rusc2	Rnf11	Gprc5c								Midn	Rbms1	Sema3f	Sh3bgr	Rbm42	Rgs10	Rasal2	Lrg1	Schip1	Prpf38b	Rps15a	Rusc2	Psmc3ip	Traip	Ttyh2	Rprd2	Rbm25	Vamp1	Rxra	Sdr9c7	Spon2	Slc43a1	Slc15a4	Retreg1	Rngtt	Schip1	Rapgef5	Mecp2		Lrg1	Rnf103		Cor1a
Rnd3	Sgca	Sacs	Rnf13	Grhl1								Miga2	Rce1	Serinc4	Sigmar1	Rbm47	Rhbdd3	Rem1	Pecam1	Serpinb2	Psapl1	Rtcb	Sacs	Ptcd1	Twf2	Ubash3a	Rps6kb1	Rbpj	Vav2	Sacs	Sec24b-as1	Sptssb	Smad5	Slc25a17	Rgl1	Ror1	Sec63	Rarres2	Mef2a		Pecam1	Arl3		Fxr1
Rnf17	Slc25a11	Scarf1	Rnf14	Gtf2i								Mlxip	Rhpn2	Serpinb2	Slamf8	Rbp7	Rnase4	Ripk1	Ab124611	Sertad1	Ptges	Rxrb	Scarf1	Ptgis	Uqcc3	Ube2e2	Rrp1b	Reps1	Wdfy2	Sf1	Slc25a26	Syngr1	Smim7	Slc35f2	Rsad2	Rrn3p1	Secisbp2l	Rasgrp1	Meg3		Ab124611	Lpgat1		Sf3b3
Rpap1	Slc35b1	Sdf4	Rnf41	Hcg11								Mob4	Ripk2	Shox2	Slc37a2	Rgl1	Rnf187	Rnf111	Ssh2	Sftpa1	Ptpn23	S100a1	Sdf4	Ptma	Uqcr11	Unkl	Sec24c	Rhog	Wdr27	Sfpq	Slc9a1	Tapbpl	Spring1	Slc38a10	Satb1	Rs1	Senp6	Rdh16	Mobkl2b		Ssh2	Map2k1		Gors2
Ryr2	Socs5	Serpina2	Rps6ka1	Hoxa10-as								Mogs	Rnf114	Siglec7	Slc39a11	Ripk2	Rpl13	Rnf208	Actn1	Sfxn4	Rad23a	Sae1	Serpina2	Ptpn3	Vwa5b2	Usp24	Senp3	Rnf13	Wnt5b	Sirpa	Smarca2	Tcl1a	Spry2	Slc7a7	Scarf1	S1pr1	Serpinb6	Rexo5	Mpdz		Actn1	Tmem63a		Exoc1
Sap30	Sos1	Serpind1	Rps6ka2	Hrh1								Mpp1	Rptn	Slc16a6	Slc40a1	Rln1	Rpl28	Rngtt	Gm1943	Shmt1	Ralgds	Sash3	Serpind1	Rab11fip1	Wdr4	Utrn	Setd2	Rprd2	Ypel5	Slc25a15	Sms	Tent5a	Ssbp2	Sox4	Sec63	Samhd1	Serping1	Rfc3	Mpl		Gm1943	Trim26		Albu
Selenow	Sos2	Sfpq	Ryk	Hydin								Mrpl37	Rrp36	Slc25a20	Slc7a1	Rnf149	Rpl31	Rrh	Il1r1	Shroom1	Rap2a	Scd	Sfpq	Ralb	Wnt10b	Xpot	Skiv2l	Rps24	Zc2hc1a	Slc27a2	Snap25	Tipin	Ssbp3	Sox7	Senp6	Selenow	Serpini1	Rgs2	Mreg		Il1r1	Ebp		Nucl
Serpinb9	Sp3	Sfswap	Satb1	Icmt								Mtf2	Sap30l	Slc2a1	Slf2	Rnf208	Rpl41	Rtn1	Slc41a1	Sik1	Rilpl1	Scel	Sfswap	Rfx2	Wrnip1	Zfp36l1	Slc12a7	Rsad1	Zfyve26	Slc30a6	Snhg12	Tjap1	Stk26	Sp3	Serinc5	Setbp1	Siah2	Rgs4	Msl3l2		Slc41a1	Prkacb		Coq6
Sertad1	Spp1	Sirt6	Sbspon	Id4								Mthfs	Sec13	Slc9a3r1	Smpdl3a	Rnf214	Rpl6	Rufy3	Prr11	Slamf8	Rnf114	Sdhaf2	Sirt6	Rnase6	Xaf1		Slc38a10	Rusf1	Znrf1	Slc3a2	Snx6	Tmem123	Stk39	Sqor	Serpinb6	Sh3bp5	Slc2a5	Rhobtb1	Mt2a		Prr11	Gbp2		Lamb2
Sgca	Srprb	Slc15a1	Senp6	Ift140								Nab1	Selenow	Slfn13	Snx15	Rnh1	Rplp1	Sccpdh	Lcn2	Slc17a1	Robo1	Sec16a	Slc15a1	Rrp12	Yrdc		Slc39a14	Scyl3		Smndc1	Sod1	Tmem19	Stt3b	Srrm2-as1	Serping1	Siglec6	Smad1	Rhoh	Napa		Lcn2	Ube2s		Sugp2
Sh3bp1	Ss18l2	Slc25a15	Serinc1	Ift74								Nat1	Sft2d2	Socs2	Socs1	Sap30	Rps15a	Shroom3	Bub1	Slc26a1	Rps6ka4	Selenon	Slc25a15	S1pr5	Zfpm2		Smg8	Sh2d3a		Snip1	Spag7	Tmem192	Susd1	Stk38l	Serpini1	Sik1	Snph	Ror1	Ndufb1		Bub1	Inpp1		Pgam5
Sh3tc1	Stbd1	Slc27a2	Serpinf1	Il12rb2								Ndst1	Slc28a2	Sp4	Socs6	Sdhaf1	S100a1	Slc22a8	Ltf	Slc30a3	Scamp1	Selenop	Slc27a2	Sac3d1			Smim8	Slc16a10		Spata2	Sptlc2	Tmem263	Syncrip	Stradb	Siah2	Sipa1l1	Socs2	Rpl39l	Nebl		Ltf	Slc1a3		Pgcb
Slamf9	Strap	Slc38a2	Setbp1	Il17rb								Ndufs6	Slc29a3	Spp1	Spc25	Secisbp2	Scamp1	Sntb1	1810033b17rik	Slc38a5	Selenov	Sesn1	Slc38a2	Sardh			Snapc1	Slc1a4		Spata6l	Src	Tmlhe	Szrd1	Stx10	Slc2a5	Sit1	Sorl1	Rrm1	Nedd4l		1810033b17rik	Dbn1		Ptpra
Slc12a9	Stx5	Slc3a2	Setx	Il20ra								Nek2	Slc2a5	Spry4	Spcs1	Sft2d2	Scn2a	Socs2	Aoah	Slc39a1	Sema3c	Sfxn3	Slc3a2	Sec14l1			Snapc4	Slc30a4		Spock3	Ssb	Tnfrsf10c	Taf5	Stx2	Slc31a1	Sla	Spin2a	Rrm2	Nf1		Aoah	Ss18		Srcn1
Slc26a2	Sumo4	Snip1	Sin3b	Ildr1								Nek6	Slc6a4	Srek1	Spen	Slamf8	Setdb1	Socs4	Vopp1	Smc5	Serpina3	Slf2	Snip1	Serpina2			Snx17	Slc35f6		Sqstm1	Taf9b	Trabd2a	Tas2r19	Supv3l1	Smad1	Slc17a4	Spink1	Serpinb8	Nov		Vopp1	Spint1		Pur4
Slc28a2	Supv3l1	Socs1	Slc7a6	Insyn1								Neurog2	Smad9	Sstr1	Sqor	Slc28a2	Skp1	Sorcs1	Arpc3	Sos1	Serpinb11	Smim14	Socs1	Serpinc1			Spout1	Smim8		St3gal5	Tc2n	Trak2	Tfpt	Tas2r19	Smarcd2	Slc27a2	Srsf5	Shmt1	Npr3		Arpc3	Serpina1		Hnrpk
Slc31a1	Synj2	Sorbs3	Smad7	Ip6k2								Neurog3	Spa17	Stab2	Srfbp1	Slc29a3	Slc35a5	Spata13	1100001g20rik	Spryd7	Sfmbt2	Snx15	Sorbs3	Sertad2			Ss18l1	Snupn		Supt6h	Tceal4	Trim38	Tigar	Tas2r7	Snx17	Slc7a7	St3gal6	Sit1	Nptx1		1100001g20rik	Grk6		Sae1
Slc47a1	Tapbpl	Spdef	Spint2	Iqca1								Nkain1	Spon1	Stau2	Srr	Slc39a1	Slc39a4	St6galnac4	Hist2h3b	Sstr1	Sh3tc1	Sptlc1	Spdef	Smr3b			Ssr1	Stag3		Synj1	Timm10	Trim54	Tmem170b	Tgfb3	Socs2	Snapc2	Stam	Slc15a2	Nr4a2		Hist2h3b	Hprt1		Mk10
Slc6a4	Tbc1d8	Sptb	Spta1	Iqch								Nrip1	Sptlc2	Supv3l1	St6galnac6	Slfn12l	Slc47a1	Suco	Clnk	Stab2	Slc13a1	Ssr4	Sptb	Smyd3			Stam	Stx10		Tbr1	Tlr10	Trpc1	Tmem178a	Tifa	Sorl1	Snx29p2	Stard3	Slc17a4	Nrip1		Clnk	Anpep		Sprl1
Slc6a8	Terf1	Sptbn4	Srsf8	Irx3								Nrm	Sptssb	Taar1	Stat2	Smoc1	Slf1	Syf2	Dcp1a	Stard3	Slc8a1	Stk16	Sptbn4	Snd1-it1			Syne1	Supt7l		Tent4a	Tlr4	Tspan13	Tmem256	Tmem14c	Spink2	Sord	Stat5a	Slc25a4	Nrp2		Dcp1a	Adm		Wdr13
Sltm	Tgif1	Sqstm1	St6gal1	Itfg1								Nsg1	Srsf7	Taf11	Stip1	Spag7	Smc3	Tab2	Hist1h3f	Stard5	Snx2	Stmp1	Sqstm1	Sorbs3			Tal1	Taf11		Tex14	Tmem101	Tspan15	Tmem263	Tmem200b	Spta1	Sp140	Stk38	Slc27a2	Pf4		Hist1h3f	Arhgef11		Rs26
Snx16	Tjap1	Srsf3	Stat6	Itgb8								Nsmf	Sstr1	Taf1c	Stx19	Spen	Smpdl3a	Taf7	Lgals3	Stau1	Sod2	Sypl1	Srsf3	Sox13			Tars2	Taf5		Tm4sf1	Tmem132b	Tspan31	Tmsb15b-as1	Tmem201	Srsf8	Spag1	Stx4	Slc30a3	Pgap1		Lgals3	Yes1		2006-09-01
Spryd7	Tm2d3	Svep1	Stx12	Itm2b								Nsun2	Stard3	Tax1bp3	Swsap1	Sprr2f	Sox4	Tamalin	Ifi30	Stx1a	Stard5	Tardbp	Svep1	Spout1			Thap11	Tbc1d13		Tmem39a	Tmem14b	Umps	Tnfrsf21	Tmem218	St3gal6	Spib	Sun2	Spa17	Pgds		Ifi30	Dyrk2		Hs105
Srpk3	Tmcc1	Synj1	Stx7	Jhy								Nub1	Stxbp1	Tbc1d14	Taf13	Sprtn	Spsb2	Tbx4	Birc5	Suz12	Steap1	Tax1bp3	Synj1	Spry4			Thumpd1	Tdp2		Tmem41b	Tmem198b	Usp7	Tns3	Tmem68	Stam	Spp1	Sv2a	Spag5	Phf14		Birc5	Hltf		Acot2
Stard3	Tmed3	Taf4	Terf2ip	Kazn								Nucb2	Syf2	Tbc1d8	Tfpi	Sptlc2	Sqle	Tex43	Ggt1	Tab2	Stxbp1	Tcn2	Taf4	Sptbn4			Tjp2	Tdrd3		Tnfrsf1b	Tmem8b	Vipas39	Top1	Tmsb15b-as1	Stard3	St6gal1	Syngr1	Spib	Phtf1		Ggt1	Pygl		Ddx17
Stat5a	Tmem209	Tcf7	Tfe3	Kcnj15								Nucks1	Syne2	Thrap3	Tg	Stard3	Srf	Tgfb2	Cd300ld	Tap1	Stxbp3	Tecr	Tcf7	Ssr2			Tmem177	Thumpd1		Tnfsf14	Tmigd2	Wdr19	Tor1aip1	Tnfrsf21	Stx3	St8sia1	Themis2	Spp1	Pigo		Cd300ld	Stat5a		Snp47
Stk31	Tmem248	Tex13a	Tle1	Kcnk5								Nudt7	Tab2	Tjap1	Tle5	Stxbp1	Ssr4	Thnsl2	Igsf6	Tbk1	Syf2	Tesk2	Tex13a	Stub1			Tmem184b	Tmem177		Topors	Tnk1	Wdr74	Trim25	Tns3	Sv2a	Stk17b	Tia1	Spred2	Pip4k2a		Igsf6	Slpi		Rl31
Stxbp3	Tmem39a	Tff1	Tlr2	Kcnt2								Nup58	Taf7	Tmem119	Tmem192	Tab2	Stim1	Tlnrd1	Gm9904	Tdrd7	Tafa5	Tf	Tff1	Stx2			Tmem187	Tnfsf10		Tpm4	Tor3a	Zbed5	Tspoap1	Tomm70	Syngr1	Sts	Tkt	Stil	Pip5k1a		Gm9904	Loc101060431 /// pias3		Rp3a
Tacr2	Tmx4	Thbs2	Tmsb4y	Kctd16								Orc3	Tbk1	Tmem123	Tmem38b	Tek	Supt4h1	Tm6sf2	Gm5150	Tmem106a	Tal1	Tia1	Thbs2	Susd4			Tmem223	Tp53		Tspan1	Tprg1l	Zc3h12b	Txndc15	Tsen15	Syt11	Susd6	Tle1	Sts	Pla2r1		Gm5150	Zbed1		Vinc
Tbc1d13	Tp53	Thbs4	Tnfaip3	Kdf1								Pacrgl	Tek	Tnf	Tnfrsf1a	Tent2	Taldo1	Tnfaip6	Ccnb1	Tmem266	Tas1r1	Timm8a	Thbs4	Syngr3			Tnrc6b	Trappc2		Tubb3	Trerf1	Zc4h2	Tyms	Ttc13	Tbxa2r	Swap70	Tmcc1	Syne1	Plac8		Ccnb1	Ninj1		Copb
Tbl1x	Trim16	Tmem39a	Togaram1	Kiaa2013								Pank3	Timp1	Tnp1	Trim32	Tgfa	Tceal9	Tpbg	Rnf160	Tnfsf9	Tbx18	Tmem101	Tmem39a	Syt12			Tob1	Trim58		Uba6	Trim47	Zeb1	Ube2g1	Ttl	Themis2	Syne1	Tmem87a	Syne2	Plat		Rnf160	Papss2		Sos1
Timp1	Tsg101	Tmub2	Tor1aip1	Kif1b								Papss1	Tmem192	Trat1	Tsnax	Tgm2	Tesk2	Tpr	Pygl	Trim34	Timeless	Tmem208	Tmub2	Tcf12			Toe1	Tsc22d4		Ubap1	Trpc5os	Znf134	Ube2h	Tubal3	Tkt	Synj2	Tnfaip1	Tacc1	Plaur		Pygl	Chst15		Lmnb2
Tmem106a	Tspan3	Tpgs2	Traf6	Kif1c								Parg	Tmem243	Trib2	Txndc5	Timm50	Tmem147	Trpm5	Ssr2	Tsc22d1	Tkfc	Tmem216	Tpgs2	Tcf7			Trim26	Tspan14		Ube2b	Txn	Znf252p	Ubxn2b	Ube2g1	Tle1	Tacc1	Tnfaip3	Tada3	Plek		Ssr2	Fbln5		H4
Tmem39a	Ttc33	Tpm3	Trib2	Kif9								Pax8	Tnfsf9	Trim26	Uba1	Timp1	Tmem242	Tsc1	Dstn	Ttc39c	Tmem106a	Tmub2	Tpm3	Thbd			Troap	Tst		Ube2d3	Umps	Znf561	Ugt2a3	Vav3	Tmcc1	Tbc1d9	Tnfsf4	Taf5	Plrg1		Dstn	Gatm		Hnrpu
Trib2	Tubgcp3	Trdmt1	Trim13	Kitlg								Pex12	Tor1a	Trim33	Ube2e3	Tm2d3	Tmem38b	Tsga13	Sirpb1	Txnip	Tmem243	Tnrc6b	Trdmt1	Timm8a			Tsc1	Ttc33		Ube2w	Urgcp	Znf611	Uhrf1bp1	Wbp1l	Tmem87a	Tcl1a	Togaram1	Tbc1d1	Pmp22		Sirpb1	B3gnt1		Mcu
Trim25	Twnk	Trip11	Trim22	Klf3-as1								Pex19	Tph1	Trps1	Ubn1	Tm4sf4	Tmem50b	Ttbk2	Bub1b	Unk	Tmem47	Trim39	Trip11	Tmem43			Tuba4a	Ttk		Ube3a	Vamp1	Znf646	Vapa	Wdr12	Tnfaip3	Tead4	Trank1	Tes	Pms1		Bub1b	Mtrr		Ctro
Trim34	Ube2w	Tubb3	Ubl3	Klf4								Pgf	Trip12	Ublcp1	Ubxn8	Tmem131	Tnfaip8	Tut1	Ly6c2	Upp1	Tpr	Trim59	Tubb3	Tmem74b			Tubg1	Tuba3d		Ulbp2	Wapl	Znf674	Wasf1	Wdr83os	Tnfsf4	Tes	Tspan7	Tjp1	Pnma1		Ly6c2	C11orf49		Sfpq
Tspan10	Ubl4a	Ulbp2	Vamp3	Klrk1-as1								Phf2	Ttr	Ubox5	Umod	Tnf	Tomm20	Ube3a	Il1b	Usp25	Tra2b	Trmt1	Ulbp2	Tp53bp2			Txndc15	Tut4		Use1	Xpo1	Znf709	Wdr33	Wfdc21p	Traf3ip2	Tfdp2	Tspan9	Tmpo	Pold2		Il1b	Nsmaf		Cor1c
Tssk2	Usp10	Usp32	Vamp4	Krt7								Phlda1	Ttyh1	Uty	Unc119	Tpbg	Tp53inp2	Ubxn2a	Saa3	Vcan	Trmt10a	Tti1	Usp32	Tpst2			Uba3	Txndc15		Usp16	Zbtb20	Znf780b	Zbtb10	Yy1	Trank1	Tgfbr2	Ttbk2	Tmsb15a	Pparg		Saa3	Tgif1		Rs23
Ttyh2	Utp11	Usp7	Vdr	Lcn2								Phtf1	Tuba8	Wasf1	Vrk2	Trim41	Tpk1	Ugt8	Ncf4	Vcl	Tspan33	Tubb2b	Usp7	Ttc23			Ubb	Uba7		Usp32	Zbtb4	Znf791	Zmiz1	Zbtb10	Trappc6a	Tjp1	Ubl3	Tnfrsf17	Ppif		Ncf4	Itgb1bp1		Al4a1
Tubg2	Vamp2	Vps54	Vnn2	Lime1								Pla2g6	Tyk2	Wnt10b	Wasf3	Tspan13	Tshz1	Vcp	Camp	Vstm2b	Tstd1	Ubxn1	Vps54	Tuba1a			Ube2l3	Ubr7		Usp7	Zc2hc1a	Znf829	Znf385c	Zbtb34	Tsc22d4	Tnfaip8	Vgll4	Trat1	Ppm1b		Camp	Slc25a12		Dclk1
Tyk2	Vps16	Vsx1	Yipf1	Linc00271								Plaat1	Tyw5	Xrn2	Wdr20	Tspan33	Ubxn8	Vti1a	Hdc	Washc4	Tyk2	Ufsp2	Vsx1	Ubap2l			Vdac3	Vipas39		Wdr37	Zdhhc14		Znf608	Zfp1	Tspan7	Tnfrsf17	Washc4	Trib2	Prkab2		Hdc	Pdlim7		Larp1
Usp15	Wdr25	Ybx3	Ythdf3	Linc00476								Retreg2	Ubac2	Yipf7	Wdr81	Ttc39c	Ucp2	Wnt7b	Cd52	Wdr86	U2surp	Vcp	Ybx3	Ucp1			Yy1ap1	Vps16		Wdr4	Zdhhc6		Znf75d	Zmiz1	Tuba4a	Trat1	Wdfy3	Trim26	Prkar2b		Cd52	Tp53i11		Fa49a
Vamp8	Wdr43	Ypel5	Zdhhc17	Linc00899								Retreg3	Ube2r2	Ypel1	Wee1	Ugp2	Unc5c	Yrdc	Itgb2	Xrn1	Uggt2	Vdac1	Ypel5	Vim			Zbtb18	Wdr25		Ypel5	Znf35		Znf880	Znf385c	Uba7	Trib2	Wfs1	Trim9	Prtfdc1		Itgb2	Suco		Lanc2
Vcl	Wscd1	Zc3h15	Zeb2	Linc00963								Rmc1	Ubl4b	Zbtb2	Wnt2b	Usp25	Wbp11	Zbtb7a	Ctsg	Ythdc1	Usp25	Wdr45	Zc3h15	Ybx3			Znf175	Zdhhc7		Zbtb43	Znf41			Znf529	Ubl3	Tsr1	Wsb1	Ttk	Pscd4		Ctsg	Cyp19a1		Gna13
Vps72	Ythdc1	Zfr2	Zfp36	Linc02888								Slc25a51	Ubl7	Zbtb20	Ywhah	Vamp8	Xbp1	Zc3h7a	Cd33	Zc3h12c	Vdr	Xbp1	Zfr2	Znf142			Znf177	Zkscan4		Zc2hc1c	Znf589			Znf570	Usp15	Ttf2	Wwp1	Ttn	Ptafr		Cd33	Cpq		Tim29
Vrk2	Zfp69b	Znf587	Zfyve16	Lmf1								Smim11a	Vcan	Zc3h12c	Zdhhc20	Vtn	Xpc	Zfp57	Cxcl2	Zim3	Vrk2	Xpot	Znf587	Znf721			Znf184	Znf135		Zfyve16	Znf770			Znf608	Vav1	Ttn	Ybx3	Tubb4a	Ptp4a3		Cxcl2	Abca1		Pckgm
Wdr54	Zfyve16	Znf674	Zkscan4	Lmo7								Smim3	Washc4	Zfp62	Znf235	Washc4	Yae1	Zmym5	Abca13	Znf296	Wbp4	Ywhah	Znf674	Znf771			Znf22	Znf177		Znf143	Znf844			Zswim7	Washc4	Ugt2b15	Zfyve16	Uvrag	Ptprd		Abca13	Sema4d		Uggg1
Wnk4	Znf302	Zpr1	Znf195	Lmtk2								Spidr	Wfs1	Zmym4	Znf436	Zc3h18	Zc3h14	Znf146	Bc100530	Znf354c	Wdr43	Zfand1	Zpr1				Znf440	Znf184		Znf654					Wwp1	Ugt8	Zmiz1	Vnn2	Ptpre		Bc100530	S100a9		Amph
Zbtb7a	Znf518a	Zyx	Znf202	Lmtk3								Tmem242	Yrdc	Znf124	Znf574	Zeb1	Zdhhc6	Znf280d	Mospd1	Znf689	Xcr1	Zfand2a	Zyx				Znf443	Znf391		Znf674					Zfyve16	Uvrag	Zmym2	Wasf1	Ptprm		Mospd1	Camlg		Eaa2
Znf318	Znf646		Znf32	Lnp1								Tpgs1	Zbp1	Znf212	Zwilch	Znhit2	Zic4	Znf436	Gm9733	Znfx1	Yars1	Znf287					Znf573	Znf768		Zpr1					Zmiz1	Vnn2	Znf135	Zcchc24	Ptx3		Gm9733	Lpl		Grp78
	Zscan31			Lrpap1								Vps50	Znfx1		Zyg11b	Zscan22		Znf771	Ceacam1	Znrf1								Zzz3		Zyx					Zzz3	Wapl	Znf32	Zfp36	Rad1		Ceacam1	Ptpn18		Rl7a
				Lrrc19															Txndc12																				Rad23b		Txndc12	Znf185		Roa2
				Lrrc57															Chi3l3																				Rapgef2		Chi3l3	Fstl3		Hnrpq
				Lrrfip2															Pglyrp1																				Rarres1		Pglyrp1	Sult1a1		Mic19
				Lrrk2															Cpne8																				Rasd1		Cpne8	Skp2		Idhp
				Lrrk2-dt															Pira3																				Rassf8		Pira3	Dgat1		Dreb
				Lsm8															C5ar1																				Rdh11		C5ar1	Itpr1		Pak1
				Lyg1															Ifitm6																				Reln		Ifitm6	Tcf4		Hnrpc
				Lyplal1															Loc625360																				Ren		Loc625360	Arhgef17		H2ax
				Macc1															Cd177																				Rgs2		Cd177	Ctso		Tdrkh
				Map7															4932438a13rik																				Rpl23		4932438a13rik	Dync2li1		Psd3
				Marveld3															Xdh																				Rps13		Xdh	Sts		Hemh
				Mcfd2															Myo9a																				Runx1		Myo9a	Blvra		6pgd
				Med11															Mmp8																				Rxra		Mmp8	Rgs3		Vp33b
				Met															Rab1b																				Saa4		Rab1b	Map3k5		Eif3a
				Mia2															Stfa2l1																				Scamp2		Stfa2l1	Thbd		Glsk
				Mid1ip1															Cd300lf																				Sdc2		Cd300lf	Gclm		Pspc1
				Mindy2															Asprv1																				Sdc4		Asprv1	Cdc6		Sfxn1
				Mir17hg															Olfm4																				Sla		Olfm4	Slc31a1		Rl10a
				Mir31hg															Il10rb																				Slc11a2		Il10rb	Nupl2		Rl28
				Mitf															2810416g20rik																				Slc25a14		2810416g20rik	Fcgr3a /// fcgr3b		Nfs1
				Mmp15															Il8rb																				Slc25a6		Il8rb	Fcgr3b		Ttyh1
				Mon1b															Slfn1																				Slc27a2		Slfn1	Cebpa		Pura
				Mri1															Slpi																				Slc39a6		Slpi	Rnf144a		Mic26
				Msi2															Siglece																				Slc39a8		Siglece	Pten		Actn1
				Msln															Gp49a																				Slc43a3		Gp49a	Stk3		Gak
				Muc12-as1															Bc031361																				Slc44a1		Bc031361	Fry		Hint2
				Muc3a															Fcgr3																				Slco4a1		Fcgr3	Cd48		Chm4b
				Myh8															Cmah																				Smox		Cmah	Adk		Thil
				Myl3																																			Snrnp200			Gadd45g		Rs19
				Naaladl2																																			Snx4			Gpr137b		Odp2
				Napepld																																			Sox13			Enpp4		Asns
				Nbl1																																			Spc18			Sipa1		Psip1
				Ncbp3																																			Spp1			Wasf1		Stx1a
				Ndfip2																																			Spp2			Sbno2		Nacam
				Nek4																																			Ssbp2			Fcer1g		Neb2
				Nfat5																																			Steap2			Vdr		Npm
				Nfatc2ip																																			Syt1			Pkmyt1		Synrg
				Nfia																																			Tada3l			Rgs19		Ppcel
				Nfib																																			Tbc1d12			Vprbp		Nac2
				Nkain3																																			Tf			Mrp63		Ddx1
				Nlrx1																																			Tgfbr2			Grk5		Lpprc
				Nrxn3																																			Timp1			Slc12a2		Grb2
				Nsun5																																			Tp53i11			Kif21b		Aldh2
				Nsun7																																			Trim58			Slc2a5		Cend
				Nus1																																			Trip10			Cxcl1		Nduv2
				Nus1p3																																			Trip6			Nov		Rs3a
				Ocln																																			Tspyl2			Samhd1		Vatf
				Oclnp1																																			Ttc39a			St6galnac2		Hdgr3
				Odc1																																			Tuba1b			Sell		Mppa
				Opn3																																			Twf1			Acot13		Kcc2g
				Or7e14p																																			Ube2l6			Atg14		Ndua9
				Osbpl10																																			Uhrf1bp1l			Cdk14		Adt1
				Oscp1																																			Usp6			Acd		Phb
				P4htm																																			Wdr44			S1pr1		Hyou1
				Pappa																																			Wfs1			Apbb3		Fubp2
				Parp4																																			Whsc1			Wif1		Qcr1
				Pax2																																			Wisp2			Ifit3		Cdc37
				Pax8																																			Wsb1			Parp2		Ubp14
				Pclo																																			Yes1			C2cd2l		Syj2b
				Pdcd6ip																																			Ywhag			Rcbtb2		Rbgp1
				Pdf																																			Zap70			Arhgef5 /// loc101060316		Atp5i
				Pdss2																																						Fen1		Ctnb1
				Pgghg																																						Fas		Prptz
				Phactr2																																						Smad7		Oxr1
				Phyhd1																																						Dhrs12		Decr
				Pigv																																						H1fx		Rl3
				Pik3c3																																						Tmem5		Guaa
				Pitpna																																						Btn3a3		Zo1
				Pkhd1																																						Fgl2		Rl7
				Plaat3																																						Phf16		Auhm
				Plekha7																																						Pex1		Rs2
				Pls1																																						Bcl3		Rl34
				Pom121																																						Tlr2		Mtap2
				Ppfibp1																																						Ncf1 /// ncf1b /// ncf1c		Ap180
				Ppia																																						Mafg		Rla2
				Ppl																																						Dock4		S6a11
				Ppm1a																																						Vwa5a		4f2
				Ppt2																																						Kit		Pdc6i
				Prickle1																																						Itgae		Gsta4
				Prkaa2																																						Aox1		Macf1
				Prom1																																						Ccr1		Ampd2
				Prpsap2																																						Qpct		Rtcb
				Prr15l																																						Pls1		Sptb1
				Prss8																																						Acap1		Mpp6
				Psma5																																						Coch		Mfr1l
				Ptchd4																																						Fcn1		Sgta
				Ptprd																																						Bmp2		S12a5
				Ptprk																																						Ogg1		Wdr1
				Rab3ip																																						Slc15a2		Visl1
				Rbl2																																						Gna15		Src8
				Rbm47																																						Sh2b2		Armc6
				Rbms2																																						Spa17		Sodm
				Rbp4																																						Hip1		Cdk5
				Rbpms-as1																																						Plau		Pdia6
				Reln																																						Isg15		Erp29
				Retreg1																																						Gcnt1		Sac1
				Rev3l																																						Tcn1		Mic60
				Rgp1																																						Fxn		Cski1
				Rgs12																																						Aqp9		F213a
				Rhex																																						Ggt5		Nfasc
				Rnd2																																						Fgfr1op		Auxi
				Rps6ka2																																						Cda		Hmgb1
				Rsph3																																						Kiaa0586		Plxa4
				Rundc3b																																						Aoah		Pcca
				Rwdd1																																						C4bpa		Psmd5
				Samd13																																						Hdac9		Cox41
				Satb2																																						Ap3b2		Rs16
				Satb2-as1																																						Il17ra		Atpd
				Schip1																																						Slc27a2		Lnebl
				Scmh1																																						Gsr		Clip2
				Scnn1a																																						F12		Hxk1
				Sdhaf3																																						Bik		Atpa
				Sdr42e1																																						Bzrap1		Clh1
				Sel1l3																																						Cx3cr1		Ch10
				Sema5a																																						Vnn2		Etfb
				Senp3																																						Setbp1		Ca2d1
				Serinc2																																						Cd84		Echm
				Sertad4-as1																																						Il15		Cn166
				Sestd1																																						Tgm3		Atp5h
				Sgcb																																						Itga9		Mmsa
				Sh3d19																																						Tnfaip6		Sytc
				Shh																																						Znf135		Qcr2
				Shmt1																																						Ptx3		Ivd
				Sik2																																						Tppp		1433f
				Sinhcaf																																						Ca4		Dmxl2
				Sipa1l1																																						Lmtk2		Gnaz
				Sirt5																																						Zkscan7		Pical
				Slc12a6																																						Socs3		Letm1
				Slc22a2																																						Dgkg		Otub1
				Slc24a1																																						Aim2		Pabp1
				Slc2a13																																						Cyp4f2 /// cyp4f3		Ap3b2
				Slc2a9																																						Cyp4f3		Ap2b1
				Slc35e2b																																						Mgam		Dyn1
				Slc39a8																																						Sma4		Echa
				Slc44a4																																						Ly96		Pfkal
				Slc6a20																																						Rpgrip1		Phb2
				Slpi																																						Ptger2		Vatb2
				Smagp																																						Flt3		Ndua6
				Snora74a																																						Fam65b		Rl23a
				Sntb2																																						Trim25		Snx6
				Sostdc1																																						St8sia4		Al1l1
				Spag6																																						Hist1h4a /// hist1h4b /// hist1h4c /// hist1h4d /// hist1h4e /// hist1h4f /// hist1h4h /// hist1h4i /// hist1h4j /// hist1h4k /// hist1h4l /// hist2h4a /// hist2h4b /// hist4h4		Sdha
				Spats2l																																						Il18rap		Pdia3
				Spryd3																																						Nlrp3		Qcr7
				Spsb3																																						Znf117		Idhc
				Sptlc2																																						Mapk6		Cand1
				Sptlc3																																						Cd101		Odo1
				Srgap3																																						Nr1i2		Ak1a1
				St14																																						Tnfsf8		Thio
				Stag3l3																																						Hist1h2bn		Fumh
				Stxbp6																																						Acsl1		Eftu
				Sumf2																																						Pglyrp1		Synj1
				Sun1																																						Btn3a1		Uba1
				Syne4																																						Atp5g3		Map6
				Sytl2																																						Slco4c1
				Tax1bp3																																						Fcar
				Tbc1d5																																						Ncf4
				Tcaim																																						Tnfsf14
				Tgfbr3																																						Acot7
				Tinagl1																																						Cdc14b
				Tjp2																																						Lair1
				Tjp3																																						Zbp1
				Tm7sf3																																						Traf3
				Tmc4																																						Brca2
				Tmem125																																						Lrp8
				Tmem139																																						Fgr
				Tmem161b-as1																																						Cr1
				Tmem245																																						Hist1h3a /// hist1h3b /// hist1h3c /// hist1h3d /// hist1h3e /// hist1h3f /// hist1h3g /// hist1h3h /// hist1h3i /// hist1h3j
				Tmem252																																						Flnb
				Tmem43																																						Macf1
				Tnfaip1																																						Prkdc
				Tnfrsf10c																																						Eif5
				Tnfsf10																																						Lta4h
				Tnfsf13																																						Smarca4
				Tpk1																																						Golga8a
				Tpmt																																						Atp1b3
				Trhde-as1																																						Canx
				Tril																																						Rps28
				Trim38																																						Nadk
				Triobp																																						Cyfip1
				Tspan1																																						Lgals3
				Tvp23b																																						Tcf12
				Txnip																																						Anapc13
				Ubb																																						Esd
				Ubxn10																																						Trio
				Upk1b																																						Ehd1
				Vapa																																						Papss1
				Vapb																																						Numb
				Vps37d																																						Coro1a
				Vti1b																																						Sh3glb1
				Vwa5a																																						Hbp1
				Vwa7																																						Wbp2
				Wdfy3																																						Trip6
				Wdr48																																						Asph
				Wfdc2																																						Mboat7
				Wfdc5																																						Pim1
				Wnt5a																																						Klf5
				Wscd1																																						Mfsd10
				Xpc																																						Sqle
				Zbed5-as1																																						Stx3
				Zbtb18																																						Degs1
				Zbtb20																																						Tspan4
				Zfp3																																						Slc39a8
				Zmynd12																																						Ulk1
				Znf599																																						Ppap2b
				Znf655																																						Grb10
				Zscan31																																						Syne1
																																										Stra13
																																										Ceacam1
																																										Ndn
																																										Nxt2
																																										Fam49a
																																										Erap1
																																										Clec2b
																																										Dbp
																																										Prkaa1
																																										Znf330
																																										Ppp3cb
																																										Cdc42ep2
																																										Colgalt2
																																										Aif1
																																										Rad51d
																																										Mapk13
																																										Spag1
																																										Kcnj15
																																										Cst7
																																										Itgax
																																										Il1rap
																																										Bcl11a
																																										Mtx1
																																										Ncald
																																										Cyp4f2
																																										Vegfa
																																										Birc3
																																										Loc101060460 /// polr3c
																																										Tp53i3
																																										Tfpi
																																										Fpr2
																																										Phlpp1
																																										Ibtk
																																										Lilra2
																																										Il1r2
																																										Fcgr2c
																																										Aplp2
																																										Padi4
																																										Serpinb6
																																										Ptprn2
																																										Erg
																																										Eid1
																																										Spin2a /// spin2b
																																										Anxa9
																																										Bdh1
																																										Scp2
																																										Myof
																																										Pard6b
																																										Cxcr4
																																										Myh9
																																										Ubr4
																																										Zfp36l1
																																										Xpo6
																																										Atp9a
																																										Atp2b4
																																										Larp1
																																										Fkbp9
																																										Il6st
																																										Mprip
																																										Mtdh
																																										Atp13a3
																																										Tfdp1
																																										Zswim8
																																										Myo1b
																																										Notch2
																																										Ywhaq
																																										Sptssa
																																										Cd59
																																										Avl9
																																										Tpm4
																																										Spry1
																																										Map4
																																										Smchd1
																																										Akt3
																																										Arid5b
																																										Znf609
																																										Rhobtb1
																																										Ddhd2
																																										Tln2
																																										Loc101060478 /// rnf115
																																										Obsl1
																																										Clec16a
																																										Daam2
																																										Ankmy2
																																										Plekhg3
																																										Megf9
																																										Pold3
																																										Dnmbp
																																										Paqr4
																																										Zdhhc18
																																										Sec24a
																																										Smc5
																																										Loc101060545 /// rpia
																																										Ankrd28
																																										Slc36a1
																																										Ptpn2
																																										Kdm6b
																																										Hoxa10
																																										Mina
																																										Gosr2
																																										Trank1
																																										Trim22
																																										Eif2ak2
																																										Tmcc1
																																										Hnrnpd
																																										N4bp2l1
																																										Kazn
																																										Abtb2
																																										F2rl1
																																										Glce
																																										Znf467
																																										B3gntl1
																																										Casp4
																																										Arap2
																																										Col9a2
																																										Zmym6 /// zmym6nb
																																										Sectm1
																																										Hipk2
																																										Insr
																																										Arhgap33
																																										Aprt
																																										Id2 /// id2b
																																										Alox5
																																										Pds5a
																																										Nenf
																																										Ncf1c
																																										Alms1
																																										Map4k1
																																										Alox12p2
																																										Plgla /// plglb1 /// plglb2
																																										Ets1
																																										Ctsw
																																										Bcat1
																																										Fcgr1b
																																										Hist1h1b
																																										Hist1h2bo
																																										Insl3
																																										Snapc5
																																										Tspan2
																																										Gk
																																										Pki55
																																										Ipcef1
																																										Plch1
																																										Flna
																																										Atp2c2
																																										Bicd1
																																										Plaur
																																										Syt2
																																										Ddah2
																																										App
																																										Gusbp3 /// gusbp9 /// sma4 /// sma5
																																										Hist1h2ac
																																										Kiaa1024
																																										Dpy19l1p1
																																										Tsc22d1
																																										Rabgap1l
																																										Ccdc88c
																																										Znf391
																																										Mcm3ap
																																										Sdhd
																																										Pld1
																																										Alpl
																																										Gk3p
																																										Neu3
																																										Map3k4
																																										Taf4b
																																										Mcm5
																																										Lpxn
																																										Tgif2
																																										Tcf7l2
																																										Ceacam21
																																										Loc93432
																																										Rrn3p1
																																										Fcgr1a
																																										Mt1f
																																										Ceacam3
																																										Diaph2
																																										Tacc1
																																										Hla-dma
																																										Pten /// ptenp1
																																										Ptenp1
																																										Itm2b
																																										Nampt
																																										Hn1
																																										C14orf166
																																										Ptplad1
																																										Ufc1
																																										Ube2j1
																																										Qars
																																										Hsd17b12
																																										Bace1
																																										Ngfrap1
																																										Fam129a
																																										Wbp5
																																										Msrb1
																																										Rnaset2
																																										Sqrdl
																																										Pdxk
																																										Eci2
																																										Snn
																																										Ankrd10
																																										Tmem165
																																										Tex2
																																										Dera
																																										Tex10
																																										Trib3
																																										Appl1
																																										Adck3
																																										Nans
																																										Pogk
																																										Tbc1d15
																																										Dhx40
																																										Uba5
																																										Golph3l
																																										Sfxn1
																																										Fancl
																																										Pgp
																																										Bbs1
																																										Tmem14a
																																										Slc2a4rg
																																										Paxbp1
																																										Fbxo34
																																										Parp12
																																										Ormdl2
																																										Mafb
																																										Lyrm4
																																										Mageh1
																																										Dusp12
																																										Rec8
																																										Atp13a2
																																										Nrn1
																																										Impact
																																										Armcx1
																																										Ift52
																																										Pdgfc
																																										Abhd5
																																										Nol9
																																										Fcgrt
																																										Pcyox1l
																																										Eftud1
																																										Tmem140
																																										Plac8
																																										Ap1ar
																																										Cep70
																																										Pdcl3 /// pdcl3p4
																																										Rhof
																																										Ppcdc
																																										Spag16
																																										Thg1l
																																										Znf232
																																										Ift74
																																										Dact1
																																										Cyth4
																																										Fastkd3
																																										Rab8b
																																										Bahcc1
																																										Ccnjl
																																										Il17rb
																																										Tipin
																																										Galnt14
																																										Flvcr2
																																										Athl1
																																										Fkbp14
																																										Pgs1
																																										Ctc1
																																										Tmem70
																																										Polr3b
																																										Dclre1b
																																										C1orf54
																																										Slc47a1
																																										Bora
																																										Eaf2
																																										Nme7
																																										2001-03-01
																																										Ogfrl1
																																										Rab20
																																										Ttpal
																																										Chst11
																																										Ercc6l
																																										Klf3
																																										Ms4a6a
																																										Bend5
																																										Tmem180
																																										Gimap6
																																										Pilra
																																										Dhrs9
																																										Linc00339
																																										Cep97
																																										Dzank1
																																										Dusp13
																																										Il21r
																																										Siglec5
																																										P2ry13
																																										Aunip
																																										Ankrd55
																																										Fam60a
																																										Tmem156
																																										Nudt6
																																										Steap4
																																										Aim1l
																																										Mak
																																										Abcg5
																																										Ccdc81
																																										Gpr97
																																										Vnn3
																																										Efhc2
																																										Ccrn4l
																																										Csnk1g3
																																										Slc38a4
																																										Cdk5rap2
																																										Fam162a
																																										Atp1a1
																																										Trim8
																																										Npl
																																										Ripk4
																																										Hyi
																																										Slc26a6
																																										Kcnma1
																																										Aamdc
																																										Rph3al
																																										Apol2
																																										Donson
																																										Vps37b
																																										Tns1
																																										Man1a1
																																										Ugcg
																																										Loc729020 /// rpe
																																										C12orf52
																																										Dnajc10
																																										Kat8
																																										Hdgfrp3
																																										Emilin2
																																										Hk2
																																										Tubbp5
																																										Ssr3
																																										Lima1
																																										Slc25a37
																																										Cdc42se1
																																										Lztfl1
																																										Ppp1r3b
																																										Acer3
																																										Fndc3b
																																										Atl2
																																										Wars2
																																										Rabl5
																																										Katnbl1
																																										Manea
																																										Hpse
																																										Tmem38a
																																										Fam45a /// fam45b
																																										Xrn2
																																										Cd99l2
																																										Hdhd2
																																										Kiaa1147
																																										Cox16
																																										Sesn2
																																										Fam198b
																																										Ldoc1l
																																										Polk
																																										Elp5
																																										Pradc1
																																										Rassf5
																																										Armc10
																																										Abracl
																																										Tshz3
																																										C9orf89
																																										Mif4gd
																																										Kbtbd7
																																										Arhgap24
																																										Dtnbp1
																																										Crispld1
																																										Tnfsf13b
																																										Lrrc8c
																																										Lrrc4
																																										Rnf135
																																										Efcab2
																																										Ropn1l
																																										Hscb
																																										Adora3
																																										Tpk1
																																										Dnajc12
																																										Loc100133130
																																										Rgs18
																																										Lgals12
																																										Cd274
																																										Hormad1
																																										Aktip
																																										C21orf62
																																										Med23
																																										Dph5
																																										Faf1
																																										Dgat2
																																										Cnfn
																																										Dusp16
																																										Tlr4
																																										Cecr6
																																										Foxd2-as1
																																										Kremen1
																																										Tbc1d14
																																										Ccny
																																										Mllt4
																																										Cystm1
																																										Atpaf1
																																										Cmtm3
																																										Ccar1
																																										Pim3
																																										Smim15
																																										Sort1
																																										Tceal8
																																										Tp53inp2
																																										Krtcap2
																																										Tmem173
																																										Ppp1r18
																																										Setd7
																																										Ccdc104
																																										Mllt1
																																										Apcdd1
																																										Slc15a4
																																										Cpsf3
																																										Gtf3c6
																																										Tmem181
																																										Cpne2
																																										Jhdm1d
																																										Mrps26
																																										Pvrl1
																																										Brpf3
																																										Pcyox1
																																										Arrdc4
																																										Acbd6
																																										Neurl1b
																																										Zdhhc20
																																										Sec22c
																																										Frmd6
																																										Tmem18
																																										Mob3a
																																										Rasa3
																																										Itprip
																																										Glipr2
																																										Mast4
																																										Pag1
																																										Samd1
																																										Zak
																																										Ifnar1
																																										Bcap29
																																										Camta1
																																										Glcci1
																																										Ankrd50
																																										B3galt6
																																										Rab11fip4
																																										Ero1l
																																										Rbm17
																																										Etv6
																																										Lix1l /// loc101060547
																																										Tmem125
																																										Pole4
																																										Znf746
																																										Irf2bp2
																																										Pigu
																																										C9orf72
																																										Midn
																																										Klhl42
																																										Rimklb
																																										Klhl5
																																										Cables2
																																										Rdh10
																																										Usp31
																																										Lonrf1
																																										Mrvi1
																																										Ahctf1
																																										Tifa
																																										Plekhg1
																																										Alkbh3
																																										Ttc7b
																																										Jdp2
																																										Paqr8
																																										Rassf4
																																										Nlrc5
																																										Kbtbd6
																																										Ckap4
																																										Fam102b
																																										Slc26a11
																																										Mbtd1
																																										Fam20a
																																										Dsc2
																																										Zfas1
																																										Sumf1
																																										Fam101b
																																										Grpel2
																																										Lrrn1
																																										Rnf217
																																										Nhlrc3
																																										Zadh2
																																										Mob3c
																																										Ncaph2
																																										Trim35
																																										Tacstd2
																																										Qsox2
																																										Kiaa1551
																																										Immp2l
																																										Nom1
																																										Miat
																																										Susd3
																																										Cpne5
																																										Pdik1l
																																										C15orf52
																																										Plxdc2
																																										Adss
																																										Sntb2
																																										Mboat1
																																										Cmbl
																																										Prlr
																																										Oxnad1
																																										Ppm1a
																																										Atxn7l1
																																										Mpzl3
																																										Sdccag8
																																										Fgd3
																																										Idnk
																																										Exosc3
																																										St3gal4-as1
																																										Pcgf5
																																										Phactr3
																																										Stk33
																																										Ccdc126
																																										Kiaa1211l
																																										Rab37
																																										Zscan30
																																										Ddx60l
																																										Klhl6
																																										Tkt
																																										Pif1
																																										Clhc1
																																										Kiaa0146
																																										C11orf31
																																										Zeb2
																																										Ecscr
																																										Nudt16
																																										Chic1
																																										Lcor
																																										Sh3rf3
																																										Ptcd3
																																										C1orf162
																																										Znf662
																																										Pet117
																																										Btbd11
																																										Odf2l
																																										Htra3
																																										Cited4
																																										Agpat4
																																										Znf44
																																										Helq
																																										Efcab4b
																																										Adrbk2
																																										Rgl3
																																										Cd82
																																										Lacc1
																																										Prdm1
																																										Znf711
																																										Loc101060409 /// nudt17
																																										Prkag2-as1
																																										Slc51a
																																										Tpcn2
																																										Fam212b
																																										Rbm47
																																										Tmem88
																																										Capn13
																																										Acot4
																																										Wdfy4
																																										Ints10
																																										Tagap
																																										Veph1
																																										Mir503hg
																																										Tigd3
																																										Kdsr
																																										Phka1
																																										Mrpl2
																																										Fam211a
																																										Chdh
																																										Mei1
																																										Aars2
																																										Nfkbid
																																										Trim9
																																										Rrn3 /// rrn3p1 /// rrn3p2
																																										Fam228b
																																										Piwil4
																																										Rsph9
																																										Bend4
																																										Ankrd9
																																										Clcn4
																																										Gpr155
																																										Ccdc62
																																										Arg1
																																										Zc3h12c
																																										Dcaf17
																																										Trim14
																																										Lin52
																																										C19orf77
																																										Emr2
																																										Gimap2
																																										Pvrl2
																																										Hecw2
																																										Akap13
																																										Rbm11
																																										Creb5
																																										Xylt1
																																										Cldn18
																																										Slc22a31
																																										Ltbr
																																										Znf197
																																										Necab1
																																										Tcp11l1
																																										Sh3rf3-as1
																																										Mcm8
																																										Rexo2
																																										Sbf2
																																										Map1lc3b2
																																										Sema4b
																																										Dis3l
																																										Cdkn2aipnl
																																										Mettl21a
																																										Atad2
																																										Gcsam
																																										Aqpep
																																										Maml2
																																										Havcr2
																																										Dclre1c
																																										Loc100506538 /// ndufaf6
																																										Linc00883
																																										Ttc22
																																										Plb1
																																										Tmem170b
																																										Grip1
																																										Ikbip
																																										Znf285
																																										Rnf175
																																										Znf439
																																										Linc00662
																																										Bcl2l15
																																										Slc11a2
																																										Prorsd1p
																																										Asb14
																																										Spata12
																																										Dhrsx
																																										Tmem154
																																										Rbp7
																																										Man2c1
																																										Sytl3
																																										Dlgap1-as1
																																										Ankrd22
																																										Loc101060527 /// naip
																																										Fcrlb
																																										Chkb-as1
																																										Stk16
																																										Slc25a51
																																										Tmem107
																																										Opa3
																																										Znf770
																																										Tpm1
																																										Pias2
																																										Dpy19l2
																																										Kiaa0754
																																										Tlr6
																																										Panx2
																																										Dgkz
																																										Cd109
																																										Dzip1l
																																										Serp2
																																										Ccdc153
																																										Trpm6
																																										Rasgrp4
																																										Tnfrsf10a
																																										Atp11a
																																										Calm1 /// calm2 /// calm3
																																										Abca5
																																										E2f7
																																										Scai
																																										Cpm
																																										Spata6
																																										Pon2
																																										Maml3
																																										Nxpe3
																																										Rrn3p2
																																										Tex9
																																										Cacnb4
																																										Hivep2
																																										Ddhd1
																																										Cpne8
																																										Linc00968
																																										Linc00665
																																										Soat1
																																										Tp53inp1
																																										Lmf2
																																										Isg20
																																										Sgsh
																																										Gm2a
																																										Znf337
																																										Rgs14
																																										Plxnd1
																																										Phf1
																																										C9orf16
																																										Pi3
																																										Hcfc1r1
																																										Ldlrap1

## Sheet: curated_pathways_HSC_function
Low-output_Rodriguez_et_al	High-output_Rodriguez_et_al	Multilineage_Rodriguez_et_al	Mk-bias_Rodriguez_et_al	Serial-engraftment_Rodriguez_et_al	HSC_vs_MPP4_Cabezas-Wallscheid_et_al	dHSC_vs_aHSC_Cabezas-Wallscheid_et_al	dHSC_aHSC_single-cell_Cabezas-Wallscheid_et_al
Mpl	Plac8	Plac8	Ifitm3	Ifitm1	Prss41	Bst1	ENSMUSG00000064339
Ifitm3	H2afy	H2afy	Rbms3	Tsc22d1	Sh3gl3	ENSMUSG00000080851	ENSMUSG00000098178
Ifitm1	Cdk6	Mpo	Ifitm1	Mycn	Ncam2	Ace	CYTB
Tgm2	Cd34	Elane	Adgrg1	Vwf	Sh3rf3	Blk	Serpinb1a
H2-K1	Nkg7	Ybx1	Tsc22d1	Glul	Ak7	Gpr35	Actb
Socs2	Ptma	Car1	Tgm2	Procr	Fam83h	Sh2d2a	COX2
Mycn	Mpo	Hba-a1	Nupr1	Nupr1	Dusp26	Il13ra1	ENSMUSG000001020
Nupr1	Cd48	Stmn1	S100a6	Pik3r1	Pla2g7	Cebpe	ENSMUSG00000101111
Hacd4	Stmn1	Cdk6	Mpl	Pim1	Tgfa	Lcn2	ATP6
Mllt3	Fam117a	Ctsg	Mllt3	Hlf	Bmper	Col8a2	B2m
Gda	Slc22a3	Ppia	Sult1a1	Mt1	I830012O16Rik	Tnfrsf19	ENSMUSG00000100862
B2m	Adgrg3	H2afz	Socs2	Matn4	Pon1	Gp49a	COX3
Procr	Ppia	Cd34	Glul	Mllt3	Csdc2	Rnf39	ENSMUSG00000083863
Txnip	Car1	Hnrnpa2b1	Procr	Art4	Gm14252	LOC101055671	Malat1
Clu	Ctsg	Dut	Trim47	St3gal1	Gprc5c	Mcemp1	Mrpl50
Sult1a1	Flt3	Hbb-bs	Lmo2	Mt2	Cldn4	Pid1	COX1
S100a6	Lgals1	Tuba1b	Mycn	Selp	Gm14207	Wfdc21	Gm11974
Rpl36a	Muc4	Nkg7	Hacd4	Prtn3	Gbp10	Clmp	Farsa
Tsc22d1	Gpx1	Mcm7	H2-K1	Fut8	Ccr5	Ccr2	ENSMUSG00000064337
Gng11	Hmgb2	2810417H13Rik	Selp	Adgrg1	Slc19a3	Mmp9	ND4
Ccnd2	Ndufa4	Cks1b	S100a9	Hoxb8	2010015L04Rik	Cd2	Rps21
mt-Co3	Serpinb1a	Ap3s1	Rps14	Ifitm3	Chst7	Ms4a4b	Cs
Tmem176b	Ccl9	Hnrnph1	Rpl13	Ptk2b	Panx2	Ifitm6	ND1
Lmo2	Oaz1	Hmgb2	Ly6a	Lmo2	Ccdc152	ENSMUSG00000096982	Entpd7
Ly6a	H2afz	Snrpf	Lrrc56	Gclm	4933406I18Rik	Gpr141	Rps28
Mmrn1	Crip1	Sell	Vwf	Sbspon	Actn3	Upb1	Rps19
Trim47	Mcm7	Tmem14c	Gda	Bex4	Stx1a	ENSMUSG00000081953	Rpl23
St3gal1	Cpa3	Ptma	Rps13	Ccnd1	Sntg2	Nova1	Rpl37
Mecom	Vim	Mcm4	mt-Co3	Pgr	Glis1	Gm14085	Lsm2
Pik3r1	Ybx1	Pdss1	Rpl30	Gstm2	Gfi1	Col1a1	Rps3a1
Adgrg1	Sell	Npm1	Hlf	Oxr1	Gm15034	Atp8b4	Ubap2
Esam	Sh3bgrl3	Myb	Pik3r1	Socs2	Sema6d	Hsd11b1	Eef1a1
Ryk	H3f3a	Rps24	Rpl5	Gapdh	Inhba	ENSMUSG00000097383	ENSMUSG00000083563
Rps21	Dut	Igkc	Txnip	Cdkn1c	Shd	Lilrb4	Rpl37a
Hoxb8	Atpif1	Ndufa4	Rps21	Mpl	Neo1	Pik3r6	Eed
Ccnd1	Ran	Pabpc1	Mecom	Clec1a	Gm9378	Ebf1	Rps18
Uba7	Hnrnpa2b1	Cd48	Hoxb8	Adgrl4	Cyp26b1	Gypa	ND2
Rps28	Hdgf	Ms4a3	Rps4x	F11r	A3galt2	Wasf1	Ddt
Serpina3g	Mcm4	Top2a	Pdzk1ip1	S100a6	Gimap3	ENSMUSG00000085872	Rps14
Rpl37a	Elane	Tk1	Gm17541	Gstm1	Klrb1c	Ccr1	Rheb
Fkbp1a	Rabgap1l	Ran	St3gal1	Slamf1	Fut4	Klra13-ps	Rpl13
Pdzk1ip1	Cmtm7	Chchd2	Def8	Serinc3	Efna1	Yap1	1110038F14Rik
Selp	Rpsa	Gapdh	Rps11	Cd63	D230022J07Rik	Siglech	Rps20
Eif4a2	Mcm6	Smc2	Ccnd2	Pdlim7	Meg3	Tifab	Isoc1
Tmem176a	Plek	Lgals1	Prss34	Ccnd2	Exph5	Cd79a	Dnajc10
Bex4	Set	Snrpd1	Fhl1	Sult1a1	Tenc1	Sparc	Snx27
Grb10	Atp5g3	Cited4	Rps16	Tgoln1	Igf2	Tyrobp	ENSMUSG00000101249
H2-D1	Myc	BC035044	Enpp5	Ptger4	Zfp37	Lonrf2	Nop14
Cd74	Fam65a	Atp1b2	Rpl36a	Tspan14	Sox9	Hba-a2	Psat1
Iigp1	Ap3s1	Rrm2	Art4	Marveld1	Setbp1	Mpo	Rps23
Aldh1a1	Klf1	AI506816	Gng11	Ehd3	Gbp9	Irf8	Timm10
Rpl37	Taldo1	Prss57	Rps20	Setd7	Slc17a8	Fabp4	Rpl18a
Myl10	Cks2	Fam117a	Jund	Gda	Gm23706	Zfp82	Ddx26b
Gstm1	Slc25a5	Cst7	Rpl37	Fnbp4	Igf1	Klrd1	Rps7
Vwf	Hn1	Mcm3	Bex4	Aldh1a1	Nova1	Cybb	Gas5
Rps3a1	Bex6	Calr	Cdkn1c	Ltb	Npas2	Hp	Senp1
Cish	Snrpf	Ighm	Lyz2	Hoxb4	Zfr2	Gzma	Rpl36
Art4	Tmsb10	Cks2	Cd63	Tgm2	Ccdc136	Hbb-bs	Rpsa
Glul	Golm1	Mcm6	Ryk	Neurl1a	Ocln	Spon1	Icam2
Cbx6	Tuba1b	Alyref	Rps18	Samsn1	Ptges	Clec12a	Rplp1
Gstm2	Anp32b	Hdgf	Rps15	Mecom	Gm13111	Lpxn	ENSMUSG00000100131
H2-Eb1	Cebpa	mt-Nd1	Gm10369	Gng11	Wnk4	Add2	Rnf144a
Scarf1	Fam46a	Atp5g3	Matn4	Amotl2	Gm6939	Ctss	Snrnp48
Rps4x	Hnrnpab	Tfrc	Gstm2	Kit	Disc1	Elane	H3f3b
mt-Nd5	Aqp1	Bub1b	Uba7	Pnpla1	Plekhg1	Ccl5	Ap2b1
Tspan14	BC035044	Fignl1	Aldh1a1	Nkain3	Sdc4	Igf1	Sptan1
Fam63a	Sh2d5	Ctse	2410131K14Rik	Itga6	Pbld1	Ctsg	Rps9
Aplp2	Bin1	Btf3	Col16a1	Sat1	Unc45b	Glcci1	Arhgap17
Tbxas1	Ffar2	Cdca8	Rpl31	Fam107b	Gbp6	Ptpru	Trappc1
Laptm4a	Dtymk	Rpsa	Msi2	Trim47	Maf	Ms4a3	Syce2
Cdkn1c	Itga2b	Uhrf1	Rpl39	Jam3	Sfrp1	Meg3	Rpl32
H2-Q4	Rfc2	Slc29a1	Cd74	Camk2n1	Spin4	F13a1	Rpl9
Rpl5	Cst7	Rps27l	Tspan14	Podxl	Chi3l7	Plac8	Rpl5
Ppic	Itgal	Slc22a3	Cbx6	Gnat2	Amigo2	Ly6d	Ifitm1
Fstl1	Anxa2	Fen1	Ptk2b	Eif4a2	Cd74	Cd52	Ptrh2
Fgd5	Tyrobp	Vim	Clu	Efna1	Ifitm7	Vpreb3	Rps5
Col16a1	Fgf18	Fcgr3	Rpl37a	Cldn12	1810062G17Rik	Ahnak	Nbr1
D630039A03Rik	Irf2bp2	Birc5	Tmem176b	Enpp5	F830016B08Rik	Camk2n1	Cwf19l2
Ptk2b	Emilin2	Flt3	Esam	Mcfd2	Atp9a	A330023F24Rik	Rps6
Myof	Lgals9	Rabgap1l	Clec1a	Gimap4	Procr	ENSMUSG00000097138	Prpf31
Mylk	Calr	Nop56	Iigp1	Nicn1	Runx1t1	Abcg4	Rps27
Ctsl	Ramp1	Hnrnpf	Serpina3g	Bhlhe41	Plekhg6	Cd53	Opa1
Nedd4	Cd52	Psma1	Slamf1	Vmp1	Trib2	Pld4	Mpp7
Tcf15	Hmgn5	Cdk4	Exosc4	Calm1	Gm11100	Nrp1	Rps4x
Abcg3	Parvg	Ermap	B2m	Fam63a	Chst2	Cd209a	Myh9
F11r	Banf1	Atpif1	Clec4g	Slc24a5	Cpne8	Hdc	Hsp90ab1
Ltb	Gata1	Cdk1	Apoe	Cdc42	Pde1b	Amica1	Rpl41
Mir9-3hg	Myb	Rpl4	Unc45b	Ly6e	Sult1a1	Gfi1	AI987944
Rpl30	Mcm2	Gm10053	Rplp2	Rpl12	Tead3	Atp1b1	Zfp318
Hlf	Hnrnpf	Oaz1	Rpl32	Traip	Cd28	Dse	Rpl14
Gabarapl1	Cox5a	Rhd	Wdpcp	Nxpe5	Gkn3	Tcf7	Cd37
Bex1	Lmnb1	Rcc1	Rps6	Col4a2	Neil2	ENSMUSG00000097579	Yif1b
Clec1a	Cd37	Actr3	Sec14l1	Cbfa2t3	Gm10499	Gprc5c	Rps15
H2-Q7	Chchd2	Clec12a	Myct1	Plod2	Kazn	Klf2	Rpl21
H2-Aa	Asrgl1	Ddx39	Rps9	Lpar6	Gm4951	Evi2a	Rps8
Rps20	Palm	Chdh	Rpl11	Bmp4	Clip3	AI607873	Rps3
Jam3	Mfsd2b	Nolc1	Fam210b	Serpinb10	Glipr1l1	Kcnd3	Rpl13a
Ndn	Syce2	Set	Rpl26	Hgs	Neb	Sorl1	Ptp4a3
Gimap8	Lig1	Dtl	Tmem176a	mt-Nd5	Sox5	Hbb-bt	Rpl8
Casp12	Nrm	Nme1	Zfand5	Rhoq	Rhbdf1	ENSMUSG00000097035	Rpl38
Cd63	2810417H13Rik	Itgal	Mylk	Ptprn	Pde6h	ENSMUSG00000097451	Tmem30a
Vmp1	Ccl3	Aqp1	H2-Aa	Pum1	Efcab4a	Usp27x	Tlcd1
Csgalnact1	Satb1	Asf1b	Cyp26b1	Sec14l1	Mmp28	Ccl6	Rps25
Rhof	Ptbp3	Atp1b3	Fgd5	Psme3	Mapre3	Sema4a	Ddx18
Rpl21	Paics	Fgf18	Cbfa2t3	Myof	Zfp612	Mpeg1	Skp1a
Gbp8	Rrm1	Satb1	F11r	Junb	Dnajb5	Fcrla	Rplp2
Gbp7	Cdt1	Rrm1	Rps28	Rnf187	Pygm	ENSMUSG00000093760	ENSMUSG00000060143
Gimap6	Pdss1	Adgrg3	H2-Q4	Tm4sf1	Myof	Lgals3	Rpl4
Klf9	Ndrg1	Lsm6	Angpt1	Tmem176b	Mgst2	ENSMUSG00000079357	Ptges3
Matn4	Snrpd1	Sdhd	Mmrn1	Rpl5	Ryr3	Trpm5	Tmsb4x
Hsd17b10	Stx3	Sdf2l1	Gabarapl1	Peg12	Traf1	1700022I11Rik	Rpl6
Enpp5	Hp1bp3	Csgalnact2	Vmp1	Oasl2	3222401L13Rik	Rab44	Rps11
Gm29123	Nucks1	Topbp1	Npr1	Tnfsf10	Sgsm1	ENSMUSG00000099757	Serinc3
Clca3a1	Snrpd3	Swi5	Scarf1	Zfp36l2	Clec1a	Ap1s2	Rpl23a
Sdpr	E2f8	Dtymk	Rpl3	Sema7a	Mks1	Pirb	Rps27a
Sox18	Nme1	Gata1	Rplp1	Gpr4	Osgin1	Mb21d2	Rpl19
Supt6	Ucp2	Cdt1	App	Zfp958	Magi2	Ms4a6c	Rpl30
Selm	Pgam1	Tcp1	Myof	Rftn1	Aim1	ENSMUSG00000097274	Lmo2
App	Pitpnc1	Srgn	Klf9	Chst2	Card10	Ncf1	ENSMUSG00000086583
Rps14	Hdac7	Gpx1	Tbxas1	Ubxn6	Wfdc2	Csf1r	Ubb
Hid1	Hmgb3	Tex30	H2afx	Ampd3	Gas6	Arhgef26	Rpl35
Oxr1	Clec4d	Klf1	Plxnc1	Cebpd	Mboat2	Sfrp2	Ppia
Rpl17	Igfbp4	Cpa3	Pbx1	D630039A03Rik	Upp1	Milr1	Smarcc1
Tspan4	Cdk4	2010107E04Rik	Asb13	Glud1	Cystm1	Itga9	Madd
Neo1	Gmfg	Muc4	Bex1	Csgalnact1	Gbp8	Csf2rb2	ENSMUSG00000085334
Nisch	Cks1b	Rnaseh2b	Nr1d2	Mgam	Ikzf4	ENSMUSG00000076609	Cab39
Rpl13	Lat2	Fam49b	Ccnd1	Tmem263	Hoxb5	BC035044	Ptma
Gm9493	Xylt1	Eif5a	Smagp	Clu	Prex2	Sell	Rpl17
Limd2	Mcm5	Rasa4	Lhx3	Tox	Gm13822	Bmp8a	Uba52
Rps9	Prss57	Eef1b2	Rpl22l1	Srgn	Csf2rb2	Cldn5	Pan3
Gimap1	Tkt	F630028O10Rik	Rpl17	Msl1	Gm16565	Tulp1	Rpl24
Itga6	Hnf4a	Slpi	Cd38	Smim8	H2-Eb1	Ppargc1a	ND5
Angpt1	H2afj	Hint1	Col4a2	Gdf3	Jhdm1d	Mzb1	Fau
Jam2	Syk	Mad2l1	H2-Eb1	Lpl	Gm10651	Atp1a3	Ddx5
Obsl1	Mgat5	Tipin	2700081O15Rik	Pfdn2	Vsig2	Anxa2	Eml4
Hes1	Gm10053	H3f3a	Fam63a	Tgfbr1	Gm5148	Xdh	Rpl3
Basp1	Etfb	Mars2	Chst2	N4bp2l2	Pou2f2	Slpi	Adgrg1
Tspan3	Samd14	Sh2d5	Itm2b	Trappc4	Lurap1	Ablim1	ENSMUSG00000082536
Rgs18	Siglecf	Pabpc4	Ly6e	Smarca2	Hivep3	Jag1	Son
Fhl1	Txn1	Mrpl18	Hoxb6	Dusp2	Gm12258	Cd7	Pim1
Cyp26b1	Kmt5a	E2f8	Samt3	Klf9	Abcg3	Trps1	Rps17
Itgb3	Btf3	Kmt5a	Defb40	Dlc1	Mllt3	Gimap3	Rpl7
Clec2d	Il17ra	Snrpd3	Praf2	Ddx3y	Irf6	Slc31a2	Tubb5
Col4a2	Ewsr1	Sh3bgrl3	Fkbp1a	Mtus2	Xkr6	Satb1	Hnrnpa2b1
Npdc1	Calm3	Eif1ad	S100a8	Erg	Rab20	Cpm	Spag9
Gimap4	Tmem14c	Rpn1	Itga6	Esam	Spo11	Eno2	ND6
Rplp1	Dntt	Myc	Ltb	Ar	Fam131a	Sfmbt2	Car2
Zfp467	Hint1	Ybx3	Pofut1	Rpl36a	Egln3	Dusp5	Ftl1
Podxl	4932411E22Rik	Dnmt1	Igtp	Hoxa5	Art4	Ly86	Rpl10a
Rab11a	Rps27l	Erdr1	Jam3	Ube2h	Mgst1	Bach2	Rpl26
Gm4951	Ighm	Ccnb2	Meis1	Cnpy3	Btc	Exph5	Rpl35a
Mettl7a1	Swi5	Serbp1	Rpl34	Sec31a	Hid1	Igsf6	Serf2
Rgs1	Eif5a	Stx3	Amigo3	4930555A03Rik	Tnip3	Gpx3	Rps12
Tns2	Birc5	Ccdc125	H1f0	Eaf1	Rusc2	Pou2f1	Rpl11
Rbp1	Nap1l1	Npm3	Oxr1	Gfi1	Airn	Boc	Cul3
Pnmal1	Nek10	Ncaph	Grb10	Zfp143	Coro2b	Ctsh	Rplp0
Praf2	Pf4	Tra2b	Itgb3	Irak2	Insrr	Hk3	Dnajc19
Ampd2	Slc16a11	Cox5a	Sox18	Angpt1	Ppp1r16b	Zc3h12d	Rps24
Itsn1	Ifngr1	Pcbp2	Fut8	Lrrc57	Chst15	Cd68	Stt3b
Arf3	Top2a	Atp6ap2	Asap3	Mat2b	Hdac11	Gria3	Wdr76
Marveld1	Dnmt1	Mfsd2b	Cpne8	Obsl1	Agpat4	ENSMUSG00000070271	Arglu1
Smarca2	Brd2	Slc38a5	Gimap5	Ackr1	Neu1	Dnhd1	Rps13
Chst2	Dock8	Snrnp70	Tns2	Lin54	Elmo3	Relb	Rab32
Epb41l4b	Pilra	Syncrip	Evc2	Zg16	Pvrl4	Ctse	Smim20
Unc45b	Srsf2	Acss1	Fstl1	Zfp324	Erp27	Blnk	Rps26
Zfand5	Nhp2	Tubb5	H2-D1	Mboat2	Wdr78	Pglyrp1	Sod1
Rpl3	Cenpn	Rfc2	Krtap4-9	Pnp	Ctsf	Cyp26b1	Hnrnpl
Itm2b	Rasa4	Pcna	Slc24a5	Gimap1	Gm7676	Pou6f1	Ifitm3
Msi2	Ung	Parvg	Mettl7a1	Ptprm	Ccdc60	2010002M12Rik	Rpl18
Syde1	Dctpp1	Srsf1	Npdc1	Drg2	Satb1	Plk2	Rap2b
Mfng	Ube2s	Serpinb1a	Sh3bp5	Rdh10	H2-K2	Ror2	Pet100
Rab11fip3	Gadd45a	Rad54l	Samsn1	Tmem158	5830444B04Rik	Rfx3	Emb
Ldhb	Cenpa	Hba-a2	Nsa2	Mtfr1l	Igf2bp2	9930111J21Rik2	Bloc1s6
Gbp2	Actb	Emb	Tcf15	Eif4g2	Ifitm1	Smtnl1	Cox14
Jak1	Cox6b2	Banf1	Soga1	Map2k1	Gm11696	Gbp9	Zfp706
Hoxb3	Ddx39	Ung	Jam2	Polr3b	Igf2r	ENSMUSG00000081974	Rpl34
Pde3b	Ptbp1	Dmkn	Gimap6	Fam217b	Sqrdl	Ms4a6b	Prrc2c
Foxk1	Add3	Cox6c	Plxdc2	Rraga	Gm19967	4632428N05Rik	Fth1
Soga1	Hnrnpm	C330027C09Rik	Gm12289	Tfpi	Tox	Maf	H2-K1
Tinagl1	Gp6	Ncapd2	Mmd2	Grb10	Gimap5	Lipo1	Rpl27
mt-Nd3	Rbl1	Pgd	C2cd4c	Palld	Arl10	M1ap	Hspa8
Rpl38	Cpsf2	Naa50	Hid1	Ptprk	Zbtb4	Fgfr3	Set
Tmem246	Uhrf1	Tpx2	Csgalnact1	Smc5	Ghr	Npr2	Arid1b
Meis1	Tmem180	Fam132a	Ehd3	Mtmr4	Rhbdf2	St8sia4	Eef2
Gm4076	Selplg	Hells	Gimap4	Eif2s2	Snn	Acbd4	Rps29
Shisa5	Icam4	Dtx4	Marveld1	Gabarapl1	Mageh1	Fcer1g	Lrrc58
Slamf1	Mcm3	Ptbp3	Clca3a1	Git1	Dnhd1	Cnbd2	Sec24c
Gm43536	Ezh2	Suv39h1	Gm15469	Rorc	Gm20467	ENSMUSG00000089706	Nfia
Rftn1	Hist1h2ap	Bex6	Ppic	Sqrdl	Mecom	ENSMUSG00000084760	Msi2
Gas2l3	Sla	Psmd14	Gimap1	Mpp5	Lhcgr	Fam102a	Rpl7a
Plscr4	Csrp3	Ifngr1	Sord	Hoxb9	Rarb	Trib1	Rps16
Csf1	Cdk1	Nup107	Neo1	Dr1	Gimap8	ENSMUSG00000097250	Rbm39
A830029E22Rik	Atp5c1	Spcs2	Hmgn3	Tnip2	Dock6	ENSMUSG00000067017	Rpl27a
Plxnc1	Btg2	Slc11a2	Npr2	Oxsr1	Nav2	Trp53inp1	H2-Q8
Abcg2	Gm31406	Dctpp1	Dusp1	Epb41l4b	Gm15651	Slc4a3	Rpl29
Fam3c	Cenpm	Blvrb	Efna1	Klrb1c	Fam84b	Gpr183	Prps1
Spata13	Actr3	Tmpo	Jazf1	Fscn1	Slc39a13	Nrk	Rpl28
Tgfbr3	Il12a	Msrb1	Cish	Nbea	Gstm1	ENSMUSG00000097507	Rpl31
P2rx1	Mlec	E2f1	Prkcdbp	4632427E13Rik	Inadl	Medag	Ppp2r2a
Gbp3	Asf1b	Sla	Rpl21	Ctsc	Tnks1bp1	Net1	Ywhaz
Tnip3	Ccnb2	Lgals9	Gas2l3	Ints10	Zfp831	Tnfaip1	Fli1
Rbms3	Gins2	Pin1	Fam213a	Enpp4	Adarb1	Cd247	H2-D1
Eng	Snhg4	Bard1	Eif4a2	Ryk	Trim14	5031434O11Rik	Angpt1
Rpl22l1	Pin4	Rab7b	Gns	Hoxb6	Vdr	Syn3	Rpl36a
Serpina3f	H2-Ob	Hspe1	Zfp36l2	Zrsr1	Gda	Psap	Rps15a
3632454L22Rik	Psma1	Snhg5	D630039A03Rik	Fbxl12	Tmcc1	Naip5	Rpl12
Smagp	Hmgb1	Dhx9	Polb	Cftr	Rgl1	ENSMUSG00000084756	Rps2
Evc2	Cotl1	Pabpn1	Adgrl4	Gas5	Nabp1	ENSMUSG00000097838	Txnip
Hoxb6	Hist1h2ae	Knstrn	Casp12	Ints8	Crebl2	Ticam2	ENSMUSG00000044285
Ptrf	Srsf7	Rad51	Abcg3	Srgap3	Fcgrt	Nhsl2	Rpl39
Krt18	Alg3	Cenpa	Fos	Bex1	Mfap2	Camk2b	Cd47
Nfix	Kif22	Prss50	Map1lc3b	Vdr	Ccdc157	Lck	Pabpc1
Cd81	Nup210	Rpa2	Sbspon	Samhd1	Nrk	Clcn5	Gpx1
Pde1b	Cox6a1	Anxa2	Smarca2	Efhd2	Ecscr	Ehd2	Gigyf2
Ehd3	Dynll1	Ddx39b	Rpl28	Marveld2	D630039A03Rik	Klrc2	Cdkn1b
Cited2	Cd53	Plek	Adgra3	Vps54	Csad	Zcchc18	Pi4ka
Nckap1	Dnajc6	Nasp	Slc6a15	Gimap3	Atp10d	4930486L24Rik	Rps10
Lgals3bp	Cyc1	Srsf7	Ptger4	Foxp2	Obscn	Mapk12	Hnrnpa1
Sptbn1	Srgn	Psmd3	Rps15a	Mfhas1	Fam213a	Prkcb	Actr2
Efna1	Mfap4	Palm	Gcnt2	Sdc4	Ndn	Btbd3	Camk2d
mt-Nd2	AI506816	Foxk2	8030423F21Rik	Gprasp1	Fam222b	Clec7a	Tpt1
Prkcdbp	Ddx39b	Ciapin1	Podxl	Gm17322	Arhgap31	Arhgap26	Gnb2l1
Lpar6	Atp1b3	Sf3b4	Hoxb3	Neat1	Znfx1	B4galt6	Rpl22
Ptprcap	Atp5b	Mcm2	Nt5c3	Cpxm1	Kcnip3	Ccpg1	Pdzk1ip1
Phactr2	Runx3	Hspd1	Mef2c	Nudt11	Rhoj	B130006D01Rik	Zfp207
Slc6a15	Tmem147	Gnptab	Srebf2	Thnsl1	Pqlc3	Ncf2	Gm2a
Fos	Hnrnph1	Mlec	Rasgef1b	Haghl	4930481A15Rik	Pkib	Rpl15
Gm13889	Dtl	Tespa1	Obsl1	Slc2a3	Sorbs2	Ets1	Cbx3
Rnd3	Man2b1	Ipo5	Shisa5	Coro2a	Sema4b	Fgd4	Rpl10
Ipo11	Mad2l1	Top2b	Rps12-ps3	Slc25a17	Pdzk1ip1	Zfp354c	37500
Igtp	Tm6sf1	Gart	Rgs1	Exoc3l	Pnck	Mn1	Pdcd4
Dio1	Cdca5	Il10rb	Bhlhe40	Tmtc2	Tbc1d8	2810055G20Rik	Rbm25
Ctla2b	Tcp1	Cdc45	Laptm4a	Golga2	A230050P20Rik	Shroom1	Tsc22d3
Chchd7	Ndufa1	Nucks1	Ost4	Klhdc2	Dsel	Fscn1	Ly6e
Etv4	Exosc8	Hsph1	Tspan3	Mylk	Hilpda	Tulp4	Hnrnph1
Tm2d2	Kcnab2	Hpn	Phyhipl	Clpb	Adrb2	Gm12185	H2afy
Slc50a1	Anp32e	8-Sep	Eid1	Guca1a	Stxbp4	Rpgrip1	Scmh1
Gimap5	S100a10	Kif15	C1rl	Gm7609	Sat1	Gbp4	Cbx1
Lhcgr	Exosc5	Ect2	Tjp1	Thsd1	Hs1bp3	ENSMUSG00000092274	Srgn
Nt5c3	Zfp422	Ewsr1	Hmga2	Spin1	Ypel2	Sh3bp5	Gmps
Map4k2	F13b	Trip13	Wdr77	Mat2a	Birc3	ENSMUSG00000097045	Oaz1
Ramp2	Cd47	Rpf2	Fmnl2	Spats2	Zfp184	Peli2	Uba7
Wfdc2	Rpl4	F13a1	Treml2	Arhgef6	1700094D03Rik	Nacc2	Celf2
Gbp6	Tpbpa	Taf2	Mast4	Kdr	Mylk	Zfp287	Ywhab
Sh3bp5	Tipin	Dnajc6	Gimap8	Cacna2d1	Grina	Nbea	Uqcrh
Fads1	Minos1	Crip1	Rps7	Pkm	Nbeal2	Cdc42se2	Eif1
Myl6	Spcs3	Hmgn5	Gabarap	Slc9a1	Hlf	Ddhd1	Zbtb20
Sec14l1	Cenpw	Smc3	Gm4707	Cbl	Selm	Pik3r1	Nt5dc1
Vdr	Rec114	Vdac2	Ensa	Phf21a	C1rl	Il4	Clk1
Prcp	Fen1	Actl6a	Aplp2	Gm1673	Samhd1	Zhx2	Abcc5
Aldh6a1	Tspo2	Cenpw	Spata13	Hacd4	6720401G13Rik	Exoc6b	Tnfaip8
Cracr2b	Slc45a3	Clec4e	Hoxb9	Gigyf2	1110008F13Rik	Sdc4	Iqgap1
2410006H16Rik	Rasl2-9	Mcm5	Mpdz	Trim6	Snord14a	Pqlc3	Ndufa3
Ncoa7	Mdh2	Cacybp	Lgals3bp	Grn	Wbscr27	Tmc4	Ddx17
Sft2d2	Pabpc1	Odc1	Rpl35a	Zdhhc9	Gata3	Sqrdl	Mbip
Klf2	Gapdh	Haao	Magee1	Fam46c	Tcf7l2	D17H6S53E	Ssr3
Hmga2	Pdcd4	Dntt	Pim1	Uba7	Lima1	Gm973	Rgs18
Grasp	Rps19	Slc25a5	H2-Q7	Brdt	Cry2	Lyz2	Rbm15
Rpl36	Abracl	Cbx3	Rab38	Nedd4	Rufy2	Tifa	Ankle2
Mt1	Actg1	Mgat5	Itsn1	Mbd5	Pkn1	Tgfbr1	Calm2
Fam219a	Mdga1	Slc16a1	Sdc2	Pnrc1	Crebrf	Catsperg1	Pcbp1
Igf2r	Tespa1	Evl	Oasl2	Smtnl2	Naip5	Slc44a1	Ptp4a2
Rps7	Hnrnpd	Rpa1	Selm	Tspan13	St7	Socs2	Ly6a
Grina	Bcor	Syce2	Sdpr	Def8	Cd151	ENSMUSG00000089829	Insig1
Hoxb9	Rtn3	Slx4ip	Pgr	Cd302	Dhx57	Alas1	Fubp1
Psap	Hnrnpdl	Mms22l	Tmem246	Fn1	Zfp945	ENSMUSG00000100691	Arpc2
Gns	G6pc3	Ffar2	Nfkbia	5031434O11Rik	Sgms1	Dock10	Gnb1
Clstn1	Atp5g1	Armc1	Pcdhb18	Tfec	Nlrc5	Zfp612	Fcho2
Eid1	Cd244	Snx14	Katnal2	Mterf4	Eng	S100a6	Notch2
Sike1	Gtpbp1	Hbb-bt	Mtmr14	BC064078	Adcy7	Aff1	Wtap
Rdh10	Tap2	Smarca5	Mfng	Sf3b6	St3gal6	Osbpl5	Cox6a1
Bmp1	Fmo4	Golm1	Tinagl1	Trim46	Dennd4a	B4galnt4	Arl6ip1
Smpdl3a	Haao	Mthfd1l	Fads1	Casp12	Adipor1	Kazald1	Vmp1
Gm20125	Mns1	Plk4	Serpinb6a	Kcnab1		Trim5	H2afz
Maged1	Rnaseh2b	Psmc6	Rack1	Nt5c3		Prnp	Ube2b
Gm19461	Snrpb	Fgfr1op	Gbp7	Wdr41		Plag1	Pabpc4l
Ly6e	Macrod1	Spdl1	Ttc39b	Dennd2a		Idh1	Hlf
Myct1	Cox6c	Cebpa	Tpst2	Dync2h1		Igf2r	Rpgrip1
Ski	Atp5k	Evi2b	Pex11a	Wbscr27		Phkb	Cnot8
Rhoj	Igfals	Tspo2	Vdr	Igfbp4		Ikzf2	Wwp2
Prkd2	Atp1b2	Pgam1	Tpd52	Fnbp1		Tpm4	Tma7
Irgm2	Rpa2	Rnaseh2a	Rybp	Caml		Sirpa	Clasp2
Zdhhc9	Sh3kbp1	Gins4	Dnajb4	Snx7		Mmp16	Ptprc
Slc48a1	Npc2	Srsf10	Junb	2210408F21Rik		Tulp3	Kmt2c
Ormdl3	Cox7c	Rbbp4	Qsox1	Cep131		Efnb2	Rsrp1
Slfn2	Ermap	Hnrnpm	Ssbp3	Foxd2		Brwd1	Jak1
Cltb	Frat2	Cd37	Sepw1	Prr5l		Chst2	Lyz2
2610035D17Rik	Irf8	Gatm	Plscr4	Rnmtl1		Luc7l2	Gstm1
Pnp	Rgs2	Frat2	Bmp4	C2cd2l		Scpep1	Ogt
Camkk1	Rnaseh2a	Espl1	Ppp1r15a	Amacr		Lzts1	Eid1
Stat1	Psmd13	Sphk1	Nckap1	Cdkn1b		Hivep3	Srsf3
Sepp1	Snrpd2	Rbm3	Ptrf	Ldhd		Zfp318	Khsrp
Ecscr	H2afv	Hspa8	Ptpn18	Fzd8		Lyst	Slc35a1
AW112010	Gnptab	Umps	Sptbn1	Ccdc86		Oraov1	Alox5ap
Lst1	Twf2	Hnf4a	Rnd2	Plscr4		Iigp1	Selk
Gm19590	Fam173a	Pcbp1	Rgp1	Gfpt1		Smurf2	Cln6
Ak1	Alyref	Cdc123	Itgb1	Mylpf		Notch1	ENSMUSG00000084349
Tmem37	Alkbh1	Gm5616	Pdlim7	1110059E24Rik		Dpp4	Map1lc3b
Gprasp1	Gm128	Uqcr11	Jun	Fkbp1a		Cd82	Dtx3l
Exoc6b	2010107E04Rik	Cirh1a	Cyp4v3	Gpr137b-ps		Camk2d	Tagln2
Col4a1	Siglecg	Ivns1abp	Abcg2	Rasal2		Ptpn14	Tmem176b
Fads3	Gng12	Ndc1	Tgfbi	Fbxo21		Fcho2	Gimap5
Dnajb4	Fabp5	Cry1	Klhdc10	Treml2		Clcf1	Itm2b
Lcp2	Pa2g4	Nutf2-ps1	Ctsb	Invs		Elac1	Ptpn18
Mtss1l	Hnrnpl	Fam105a	Ddx58	Gimap5		Rit1	Ccnd2
Adgra3	Smc2	Dbf4	Gucy1a3	Cdkn1a		Qprt	Tra2b
Hcfc1r1	E130309D02Rik	Ccz1	Palld	Gm28557		Ifitm7	Bcl11a
Gem	Psmb3	Snhg4	Nedd4	Cdcp1		Nipa1	Sepw1
Palld	Knstrn	Srm	Irgm2	C1rl		Hdac10
Rras	Cd69	Gins2	Tln1	Tspyl1		Lsp1
Lurap1	Acap2	Il6ra	Rps29	Pou2f2		Blzf1
Plxdc2	AB041806	Nrm	Epb41l4b	Pdpr		Sat1
Slc24a5	Top2b	Tacc3	Hsd17b10	Dnaja2		Rrm2b
Ankrd33b	Cep112os1	Tmem258	Phactr1	Senp2		Zscan26
Anxa5	Syncrip	Tm6sf1	Cpne3	Eif4b		Znfx1
Gaa	Atad5	Cycs	Spint2	Sepw1		Agpat4
Ost4	Nop56	Tmem97	4930458D05Rik	Dock2		Pfkfb2
Mboat2	Rad18	Hmgb3	Ctsl	Itgb3		Zfp937
Pqlc3	Bub1b	Dynll1	Aldh2	Lyplal1		Ugcg
Myo3b	Snx14	Ube2i	Mink1	L3mbtl3		Tecpr1
Pkm	Npm1	Snrnp40	P3h3	Numb		Alcam
Ptger4	Eif4a1	Bcor	Pde1b	Suv420h2		Parp14
Cenpt	Rrm2	Emilin2	Por	Il4ra		Tns1
Pnrc2	Ube2i	Vrk2	Marcks	Mpdz		Zfp329
Dcaf12l1	Ybx3	Gmnn	S100a4	Rtp4		Pam
Pgr	Mrpl34	Rgcc	Myl10	Rhoj		Zfp831
Pcolce2	Tubb5	Cd69	Gm10419	Plcg2		Apbb1
Serpinf1	Eif1ad	Myo15b	Tspan4	Cd38		Cyb561a3
Tmem158	Taok3	Nup43	Lhcgr	Insr		ENSMUSG00000087390
Prr13	B9d2	Hars	Hk2	2310015A10Rik		Rhbdf1
Nsa2	Fbxo5	Paics	Ptgs1	Dctn1		Tenc1
mt-Nd4l	Steap3	Nrp1	Rpl13a	Cdc23		Fam208a
Ppp1r15a	Nudt21	Clec4d	Ncor2	Acin1		Anxa6
Cxxc5	Pold1	Zfp422	Nub1	Mir22hg		Hspa2
Gabarap	Fam49b	Gm13075	Cdc42bpb	Adgrd1		Galm
A830019P07Rik	Itpa	Snrpb2	Capns1	Hook3		Notch3
Neurl3	Rtn4ip1	Plk1	Socs5	Nfic		Dok1
Diaph1	Fignl1	Smc4	Ccdc181	4930556M19Rik		Rin2
Pou2f2	Dmkn	Tamm41	Nisch	Phyhd1		Mturn
Nkx2-3	Ckap2l	Anxa3	Crebrf	Gng10		Tmem161b
Mbd6	Capza1	Tfap2b	Kirrel3os	Snapc3		Rab11fip3
Cc2d2a	Cenph	Nudcd2	Smo	Dusp4		Galnt7
Gm12185	Rpl41	Mapk10	Bbx	Nceh1		Slfn2
Flywch2	Ncl	Nkrf	Ormdl3	Add1		Ccl4
Ctnnal1	Armc1	Rhag	Slfn2	Lrch3		Glipr2
Poglut1	Siva1	Dcun1d5	Camk2d	Rbks		Zcchc7
Rpl7	Sec11c	Kcnab2	Efcab14	Ppfia4		Pde8b
Smg7	Bri3bp	Spire1	Mt1	Fam184a		Nav2
Csad	E2f1	Nek2	Rbp1	Slpi		Uspl1
Por	Gm4473	Sf3b6	Pqlc3	2510009E07Rik		Fn3k
Gm4707	Elf1	Frem1	Aldh3a2	Unc5a		Rgl1
Trib3	Csgalnact2	Nap1l1	Fam43a	Ift43		Ltb
Dst	Sdhd	Pdhx	Zfp467	Id2		Zfp560
Hoxa5	Tacc3	Rbl1	Rhof	Sft2d2		Gsta4
Gimap1os	Caprin1	Elovl5	Klf2	Rnf128		Fam118b
Lgals8	Arrb2	Xndc1	Nceh1	Rad9a		Arid5b
Rhob	Prdx2	Ckap2l	Cldn12	Utp6		Emb
Pcbd1	Cdca8	G3bp1	Stat3	Ctbs		Zmat1
Trappc8	Chchd1	Kif22	Gata2	Nfia		Mfhas1
Fam213a	Ppp1ca	Tbc1d31	Il2rg	Rgs14		F830016B08Rik
Rab2a	Rbbp4	Dnm1	Nfe2	Hspa5		Elmod3
Camk2d	Ndufb6	Tbrg4	Zfp36	Ankrd39		Cish
H2-T22	Slco3a1	Epha4	Lpin2	Ctnnal1		Ebi3
Tnfrsf1a	Psmc4	Atp5c1	Slc2a3	Orc4		Cd2ap
Irf9	Sipa1l1	Cmtm7	Clec2d	Plppr3		Neil1
Tnfsf12	Sfxn1	Hnrnpab	Adck3	Nsun2		Apobec1
Tapbp	Cyp2a5	Rcc2	Anxa5	Chrnb1		Gchfr
Tnfsf10	St8sia6	Dnajc8	Bdh2	Foxd2os		Slc31a1
Hmgn3	Med21	Rec114	Ascl4	Sh3bgrl2		Arid5a
Lyz2	Evl	Bri3bp	Tgfbr3	Cic		1810013L24Rik
Gm36888	Fgf3	Ssb	Rftn1	Pyurf		5930430L01Rik
Ywhab	Raly	Wee1	Tfpi	U2af2		Pde7a
Hk2	Ppp1cc	Gm11267	Ldhb	Ccdc92		Marf1
Kiz	Gm17590	Ephx2	Amotl2	Nr4a2		Stat2
Fmnl2	Tex30	Pin4	Erg	Phactr2		Gm2a
Snhg20	Ube2a	Ppp2ca	Pomgnt2	Alg10b		Ccdc171
Rell2	Pfn1	Cyc1	Coro2a	Cables2		Cd83
B4galt6	Hk3	Ppil3	0610009E02Rik	App		Cd84
Eepd1	2700094K13Rik	Bora	Stat1	Clca3a1		Arl6ip5
C1rl	Usp1	Fam65a	Prr13	Sh3gl3		Sgms1
Cpne8	Nasp	4930469G21Rik	Rhoj	Aldh6a1		Mgst1
Psme1	Ube2c	Platr17	Slc15a2	Pygm		ENSMUSG00000097777
Prnp	Orc1	Gna11	Saraf	Llgl2		Ikbke
Tm4sf1	1810065E05Rik	Sigmar1	Gm13546	Ncam2		Zc2hc1a
Ntrk3	Srm	Tyms	Aldh7a1	Pcsk4		Traf1
Map2k1	Npm3	Naa15	Slc25a4	Pcyt1a		Plxdc2
Net1	Erdr1	Gapt	Fam187b	Mbnl2		Dmtf1
Cyp4v3	Fer1l4	Ostc	Tnfsf10	Fez1		Cyba
Ubqln2	Chdh	Nebl	Raver2	Cnn3		Mroh1
Ctsc	Rab37	Idh3a	Mllt6	Ankrd13a		Spata13
Pura	Endod1	Aldh1a7	Fhdc1	Yipf2		Btd
Mef2c	Spns3	Ddx28	Zbtb25	Prkcdbp		Sgsm1
Gm17541	Mms22l	Rab44	Ago3	Tiam1		Usb1
2410131K14Rik	Car11	Ccne1	Atp13a4	Acadsb		Ivd
Mfn2	Snrpb2	Fasn	mt-Nd5	Gpr45		Tinagl1
Tgoln1	Hnrnpll	Pmf1	Thra	Bsg		Tbce
Pbx1	Bola1	Hdac2	Ppp1r18	Zfp706		Ptafr
Mansc1	Sdf2l1	Anp32e	Sgms1	Cmss1		Taf8
Rpl26	Tbc1d2b	Irf8	Hnrnph3	Phf21b		Atg10
Cox7a2l	Erp29	Stx2	A830019P07Rik	Sesn2		Lgr4
Bmp4	Rin3	Siva1	Maged1	Jak1		Myadm
Wls	Nfya	Ankrd44	Hoxb7	AU040320		ENSMUSG00000101609
Rgs3	Cox6b1	Incenp	Pdlim1	Apba3		Islr
Abca3	Tdrd3	Hnrnpdl	Mill2	Oxsm		Rbl2
Cd38	Serbp1	Hspa14	Gm11724	Apbb2		Xrn1
Insig1	Mrps18c	Eef1e1	Zbtb4	Cebpb		Map3k1
Epb41	Spi1	Ppm1g	Ywhab	Gm10125		Akap7
Gbp4	Fcho1	Uqcrc1	Grina	Tacstd2		Map4k2
Acox1	Il10rb	Dnah8	C1ra	1110034G24Rik		2310035C23Rik
Cept1	Mrpl18	Olfr796	Gm9899	Srd5a1		Mpzl1
Sdc2	Tra2b	Rgs10	Krt18	Zfp287		Cirbp
Cdk17	Mrps26	Atp7b	Fam171b	Dhx34		Vps45
6330562C20Rik	Dek	Ppid	Rps8	Rbm27		Tmem154
St7	Egln3	Cd244	Cltb	Stxbp6		ENSMUSG00000085334
Dennd1c	Psme3	Mutyh	Glrx	Lrrc49		Pde2a
Raver2	Atxn7l3	Zeb2	Nkx2-9	Akt1s1		Erlec1
Plpp3	Hmha1	Srsf2	Pde9a	Galnt12		Med11
Emcn	Aff3	Rb1	Lima1	Nat8l		Zfp36
Tbl1x	Cdc42se1	Cenpq	Evc	Rgmb		Tax1bp3
Trip6	Clec4e	Sumo2	Nkain3	Bre		Gbp8
Hs2st1	Luc7l3	Skp2	Smtnl1	Zfp7		5830428H23Rik
Psma8	Pgls	Sfpq	Camkk1	Tmlhe		Kif1b
Triobp	Ddx28	Fbl	Dhrs11	Rp2		Kat6b
Evx2	Clic1	Metap2	Arhgap28	Card10		Cd1d1
Il27ra	Ccdc125	Tifab	Ube2e2	Tmem2		Ly6a
Mink1	Grb2	Eif4enif1	Gbp8	Slc12a9		Hid1
Gata2	Sf3b6	Farsa	Ebi3	Zfyve16		Cd200r1
Fcho2	Mrvi1	Ggta1	Cnn2	Tsnax		Slc25a44
Usp46	Ccr2	Ppp1cc	Pcsk4	Stard7		D930015E06Rik
Tceal8	Lrrc59	Suz12	Slc48a1	Dlg2		Gimap8
Efcab14	Hras	Ptcd3	Mamdc2	C1ra		Ctsl
Fam110c	A230087F16Rik	Dctn6	Agpat3	Ssbp2		Rnf167
Amotl2	Mrpl19	AB041806	Pdxk	Kcnd3		ENSMUSG00000097258
B3gat2	Casp6	Hn1	Cldn10	Col4a1		Phf8
Gimap3	Tspo	Hsp90aa1	Cdcp1	Tns2		Slfn8
Card19	Emid1	Nxpe2	Glipr1l1	AI606181		Prpf39
Ehd4	Rusc1	Gtf3c6	Aig1	Adora2b		ENSMUSG00000073274
H1f0	Mrps35	Igfals	Pde6h	Tgif1		Smpdl3a
H2-T23	Ptrh2	Itga8	Lin54	Panx2		Sp100
Traip	Mrpl51	8030442B05Rik	Gas5	Pdlim1		Ankrd12
Irf2bpl	Msh6	Ssrp1	Rab7	Dio2		Syne1
Ptpn18	9330159M07Rik	Dazap1	Spr	Pde6h		Trim34a
Phactr1	Adgrl2	Hnrnpu	Pml	Zfp467		Arhgap17
Aldh3a2	Gm43549	Col5a1	Map2k1	Fnip1		Ell2
Smo	Ndufb7	Tmed2	Ccdc126	Fzd1		Itsn1
Bdh2	Bard1	Dram1	Itpkb	Ccl9		Arid4a
Jund	Hist1h4i	Upf3a	Ptprn	Stx2		Hoxb3
Nr1d2	Llph	Chtf18	Rab11a	Max		Creb3
Rps18	Ccnf	Prmt7	Card19	Cpa6		Kdm5b
Nceh1	Atp8b4	Tshr	Nicn1	Khsrp		Letm2
Arhgef6	Panx1	Siglecf	Dusp18	Brip1os		Gm12942
Tpd52	F830045P16Rik	Ndufs6	Wdr89	Gata3		Nr6a1
Aldh1l1	Stom	Gclm	Eya2	Col16a1		Id2
Gkap1	Hist1h4a	Adamts17	Kcnv2	Trmt2a		Chmp5
Plpp2	Mb21d1	Zbed4	Nos1ap	Unc45b		Isca1
Cers4	Kif11	Ezh2	Zdhhc9	Erlin2		Rbm47
Rnasel	Cenpo	Pola2	Gm12185	Arhgap23		Zfp60
Fchsd1	Gins1	Gsr	Mboat2	Jmjd8		Gimap6
Eid2	Wdr74	Eny2	Hdc	Zbtb3		Dpm2
Rfk	Hes6	Wdr12	Cebpb	Men1		Kdelc2
Slc18a2	Rasgrp2	Arhgap11a	Neat1	Ccdc51		Utrn
Gbas	Nat9	Pitpnc1	Lysmd2	Chchd10		Pnck
Gm4631	Efnb3	Arpc5l	Runx1t1	Atrn		Ptprc
Il2rg	D1Ertd622e	Wbp4	Tmem9	Naca		Zcchc10
Glipr1l1	Oip5	Lpcat2	Faap20	Lst1		R3hdm1
Zbp1	Tamm41	Tcf3	Sft2d2	Bend5		Acsl1
Fam43a	Letm1	Mb21d1	Fkrp	Ogt		Sult1a1
Aig1	Tk1	Prps1	Fzd8	Lins1		Rbm18
Mpdz	Eif4ebp2	Cdc5l	Pnpla8	Slfn8		Rnf216
Pbx3	Tgfb1	Aars	Prkca	Man2c1		Ccnt1
Fam171b	Gm6471	Snhg3	Gbas	Slc35f5		Bgn
Klf6	1110038B12Rik	Slc39a8	Tbl1x	Eid2		ENSMUSG00000079143
Mpzl1	Hypk	Panx1	Kifc3	Ift80		Ric1
Rgp1	Chek1	Arap2	Klra4	Hspa12b		Rora
Nbea	Lamtor2	Suds3	Pbx3	Itm2b		Trip4
Agpat3	Mis18a	Krtap13-1	Cyp2j6	Ncam1		Kdm6b
Ctsb	Topbp1	Tdg	Cadps2	Fam43a		Agtrap
Frmd6	Dnajc9	Rad54b	Kiz	Pepd		Tnip3
Ncoa1	Nup188	1700006J14Rik	Emc1	Acad8		Tbc1d8
Fut10	Crx	Ccdc124	Bbs10	Tcf15		Snx18
Ensa	Ccdc12	Uchl3	Prcp	Pdgfb		6330416G13Rik
Timp3	Tead4	Mbtd1	Sdcbp	Als2cl		Procr
H2-Q6	Aspm	2010300C02Rik	Zfp579	Sgms1		Lbp
Itgb1	Pcnx3	Nudt7	Atp2c1	Agpat4		Trim30a
Cbfa2t3	Ranbp1	Olr1	Gys1	Sdad1		2310001H17Rik
Crim1	Ltf	Gid8	Epsti1	Sesn1		Tgtp2
Prdx6	Nktr	Nrbf2	Nf2	Xk		Pygl
Ms4a13	Fbl	Nars	Slc25a22	Galnt11		Serpinb9
Dusp3	B4galnt1	Hnrnpd	Pcolce2	Ahctf1		Ndrg2
Pdxk	Rab44	Mrpl3	Lst1	Plekhm1		Irf9
Gm13177	Sox4	Lmnb1	Itm2a	Rexo2		Lurap1
Rps15	Ciapin1	Abat	Paqr7	Mdh1		Smap2
Ginm1	Cycs	Fam133b	Smim14	Sdhaf4		Ctns
Tpst2	Mthfd1l	Pdcd4	Fam219b	Sepsecs		ENSMUSG00000073867
Zbtb20	Arhgef39	Dhx15	Nat8f3	Rpap3		Rnf214
Rbm38	C1qbp	Cd47	Gbp2	C130026I21Rik		Ifngr1
Chst7	Aqp9	Inip	Fkbp7	Ddx58		Cers4
Sgms1	Gm2a	Uchl5	Timp2	Edar		Bin3
Tox	Cuta	4930558C23Rik	Padi4	Cyp20a1		Cox7a2l
Cyp2j9	Cypt15	Mthfd1	Wbscr27	Fgf12		Tubb6
Rchy1	Hba-a1	Papd4	Tes	Mfng		Xbp1
Ube2e2	Sh3bgrl	Mdh2	Rplp0	Zfp46		Eya2
Lrrc56	Scamp3	Hsd11b1	Gspt2	Gm9830		Trim65
Pex11a	Ndufb2	Rims4	Traip	Gpr35		Ccser2
Cldn12	Kcnn2	Klhl12	Dennd2d	Zfp689		Lima1
Tmem194	Eef1e1	Psme3	Acox1	Kcmf1		Ctsb
Gm11837	Arhgap33	Lig1	Mier1	Cytip		Cd24a
Ppa1	Fam78a	Trpm5	Capg	4930480K23Rik		Cyth4
Evc	Platr6	Pole2	Timp3	Spcs2		ENSMUSG00000044867
Lrrc16a	Cdkl3	Polr2d	Actn3	Stxbp4		Ube2f
Maff	Tuba4a	Znhit3	Adgrd1	Acbd5		Ezh1
Nos1ap	A230028O05Rik	Stil	Tas2r124	1700029J07Rik		Cdc26
Dbnl	Tada2b	Emc10	Trpc6	Sh3yl1		Hoxb5
Nrap	Fam111a	Gypa	Gm12942	Gcnt2		Cyp4f13
Chil6	Sssca1	Trmt6	Dio1	Pid1		Nsun4
Cetn4	Ccz1	Sgms2	Neurl3	Flcn		Gpn1
Plekho2	Snhg3	Rfx6	Gm6297	Hnrnpc		Mettl7a1
Irak3	1700006J14Rik	Casp6	Mctp1	Usp3		Slc25a36
Gm26870	Cmklr1	Ccnb1	Psap	Rasip1		Oasl2
Sord	Ctcflos	Nudt21	Csrp2	Tjp1		Slc22a18
1700021P04Rik	Srpk1	Bid	Cecr2	Fam45a		Lst1
Slc2a3	Ms4a3	Metrn	Utrn	Rab11fip2		Trib3
Capn5	Stil	Poc1a	Pcbd1	Atp1a1		Inpp4a
Tbkbp1	Mrps28	Ssr2	Orai1	Il6st		Il2rg
Pde9a	Smim5	Hnrnpc	Syt11	Hs3st1		Samhd1
Pcmtd1	Rbm3	Taok3	Tmbim4	Mecomos		Tsc22d1
Tpst1	Spc24	Dot1l	Zfp952	Rcan1		Epb4.1l4b
Prkd3	Ssrp1	Mrpl55	Tnfsf12	Hmgn3		Cytip
Srr	Cbx3	Itgbl1	Adad1	Thbd		Ecscr
Med31	Mylk3	2310005E17Rik	Prnp	4930415F15Rik		Araf
Tm9sf3	Cox7b	Zcwpw1	Trav21-dv12	Pogz		St7
Mamdc2	Arl11	Tmem147	Ncoa7	Ndel1		Traf3ip3
Pomgnt2	Slbp	Med21	Ipo11	Dbhos		Gstm1
Pld1	Ndufb8	Fis1	Pkp4	Fchsd1		Rock2
Nrarp	2810408I11Rik	Add2	Tm4sf1	Nrap		ENSMUSG00000041481
Gm16702	Gse1	Nup93	Mt2	Frmd6		Il16
Rmdn1	Tomm40	Ptpn11	Slc6a6	Nsf		Tspan14
Polb	Gm5616	Serf2	Nab1	Il1f9		Impact
Grid1	Spag5	Itpripl1	Luzp1	Rbm4b		Trim41
Tmem52	Gtf3c6	Mmp19	Armcx6	Rps6ka2		Arglu1
Fam210b	Zfp568	Gpr87	Tmem134	Cx3cr1		Fam107b
Gbp5	Zfp518b	Ppat	Slc35e4			Slfn5
Zfp395	Lsm4	Adam17	Cracr2b			Mcoln2
Mageh1	Gmnn	Gm15326	Igf1			Gm4951
C1ra	Tdg	Cenpm	Tox			Phyh
Tmem109	Tceb2	Bin1	Robo4			Sepp1
Cpt1a	Ptp4a3	Plaa	Sfrp1			Vamp4
Gm15688	Ccng2	Pyhin1	Uba52			Foxp1
Lysmd2	Acss1	Slf1	Hist3h2a			Dtx4
Cyb5a	Ncapd2	Tctn3	Trip6			Nipbl
Paqr7	Rpf2	Znrf2	Bmpr2			Il15
Pygm	Rpl27	Usp1	Camk2n1			Pgpep1
Fbxo11	E2f4	Mns1	Siae			Ip6k1
Glrx	Col15a1	Selplg	Dr1			ENSMUSG00000069540
Fam120aos	Usp11	9230105E05Rik	Clstn1			Vipas39
Ddx17	Rpn2	Fabp5	Atp6v1b2			Rab3il1
Dennd2d	Npepps	Lax1	Tnks1bp1			Abhd14b
mt-Atp8	Cdca7	Fcgr2b	Amacr			Klc4
Prdx4	Trim28	Eif3h	Lamp2			Igf1r
Smad5	Svbp	Gprin1	Grn			Pla2g15
Gm27002	Tshb	Bcas2	Olfr455			Marcks
Fcor	Bora	Spcs3	Rnf24			Prrg2
Zmynd11	Acads	Cd44	Fundc2			Ginm1
Neat1	Thop1	Zfp568	Gm13889			Ppox
Dlg2	Pdhx	Fam46a	Il18bp			Elk4
Tas1r3	Orc2	Hyou1	Plcg2			Copz1
Med28	Hyal3	Ndufs5	4931413I07Rik			Pan3
Npr1	Ube2m	Thoc6	4933407I08Rik			Ifitm1
Gata3	Wasf2	Ica1l	Pim2			ENSMUSG00000064339
Gm16140	Tpte	Sf3b1	Tshz1			Gatsl2
Rnf24	Umps	Mthfd2	Dcun1d1			Pdzk1ip1
Rom1	Cntrl	Phf10	1110002L01Rik			Ndn
Sec31a	Lrp1b	2810004N23Rik	Prss54			Irf7
Nfia	Pkmyt1	Kif11	Pddc1			Pik3cd
Gm20642	Arid1a	Ndufab1	Csnk1d			C530008M17Rik
Ebi3	Gm12916	Ccl9	Gm20319			Ccnl2
Vps41	Scrn3	Dek	Fscn1			Alkbh5
Marcks	Dctn6	Rcl1	Klf6			Plin3
Fnbp1	Kirrel2	Tpm4	Tcrg-C1			Ddx60
Wtip	Abcb10	Mapkap1	Nlgn2			Cyp2j9
Akap8	4930455G09Rik	Tubgcp4	Zfp2			Zbtb20
Sh3gl1	Usf2	Mapt	Aldh6a1			Anxa1
Faap20	Jph1	Pf4	Chchd7			Paqr7
Pitpnm1	Zbed4	Psmg3	Cytip			ENSMUSG00000097296
Anxa7	Ubn1	Lhx5	Ptk2			ENSMUSG00000092250
Hmgcl	Ltb4r1	Paox	Ak1			Fyco1
Scml4	Nfyb	Wdr83	Gnai2			Gfpt2
Tmem150a	Litaf	Ank1	Tpbpa			Sp140
Ncor2	Rbmxl1	Exosc5	Kcnk5			Notch2
St3gal6	Clec12a	Orc2	Rfxap			Gimap5
Xpo7	Zmym3	Fastkd3	Mkln1			Wtap
Fjx1	Gm10827	Depdc1b	Cxxc5			Insig1
Tmub2	Prg4	Ube2s	Rpl7			Tbc1d20
Kcnk5	Atp5e	Ctcflos	Ighv6-5			Nfia
Eef2kmt	Smc3	Cenpi	Ube2g1			Ctsf
Exosc4	Kdm4a	Wisp1	Irf2bpl			Hlf
Golga5	Psma6	Oip5	Cnot6l			Zeb1
Rpl24	Scin	Zfp277	Shroom4			Mllt3
Gm38404	Hnrnpul2	Cdc25a	Rpl24			Iqgap1
Txndc15	Nop9	Anln	Olfr894			C1rl
Cd82	Cenpq	Sync	Smpd5			Mecom
Plekhb2	Gnb2	Cox7c	Cyth4			Cbx6
Lmcd1	Inpp5b	Trp53	Slc9a8			Dennd1c
Adck3	Gtf2ird1	Piezo1	Ube2l6			Sesn1
Zbtb4	Dbt	Ice2	Pcgf2			Mxd1
Gspt2	Rnf144a	Asf1a	Gm12374			Clip3
Foxn3	Has2os	Slc25a21	Dnm3			Map3k5
Mapk12	Stk11	St3gal5	Plscr2			Birc6
Pitpna	Fcrl1	Magohb	Gkn3			Eci2
Akt1	Lsm6	Arhgap19	Cfl2			Crebrf
Csrp2	Eif4enif1	Ccne2	1500026H17Rik			Shisa5
Enpp4	Deb1	Cuta	Zmynd8			Tsc22d3
Capns1	Tceb1	Ighe	Mansc1			Atp6v1b2
4930407I10Rik	Ltc4s	Ammecr1	Fam212a			Cpq
Adgre5	Cks1brt	Ube2a	H2-T23			Kmt2d
Trmt2b	Mslnl	Bik	Stk24			Abhd2
Cyp2j6	4930516B21Rik	Dnajc9	Basp1			Fis1
Gstt1	Tmem123	Sltm	Tie1			Nceh1
Cmtm4	Dhx57	Abcb10	Hoxa3			Pygm
Actn3	Gpr65	Slbp	Rpl36			Tmem173
Clpb	Inpp5d	Gm4858	Tmem130			Tnip1
Wdr89	Rps2	Egln3	Sema7a			H2-T23
S100a4	Nolc1	Psmb6	Rell2			D630039A03Rik
Slc25a4	Rad51	Ranbp1	Pabpc4l			4632427E13Rik
Olfr1465	Xpc	Akap6	Scx			Srxn1
Tsc22d3	Cacng3	Ndufc2	1110008L16Rik			Tbxas1
Mrpl4	Ptpre	Paqr9	Twsg1			Slc39a1
Gm17677	Msrb1	Pate3	Mef2d			Npc2
Pde2a	Med8	Dazap2	Tmem64			Mtm1
Kazald1	Pif1	2010315B03Rik	Pigp			Zbtb4
Mrfap1	Gm32592	Cenpl	Cox7a2l			Baz2b
Cfl2	1110059G10Rik	Nhej1	Rdh10			Efna1
Ppt2	Bag1	Smn1	2010106C02Rik			Tmem50a
Rpl11	Lmo4	Gm16194	Col4a1			Tmem176a
Hspbp1	Csk	Nat2	Aprt			Gata3
Hbegf	Psmd8	Fer1l4	Clec14a			Btg1
Gab1	Gm13814	Hnrnpl	Aip			Hbp1
Rorc	Cnst	Rfc5	Snx17			Rac2
Sema7a	Asf1a	Sim1	Epb41l4aos			Jam2
Cx3cl1	Ypel1	Dcp2	Rhbdd2			Ago4
Bhlhe41	Trak1	Commd5	Cd9			Irf2
Olfr920	Psmd7	Syk	Dtx3l			Rabep2
Tecpr1	Csf2rb	Gm16208	Golga5			Lpp
Sdc4	Timm17b	Atp5k	Ndn			Eps8l2
Olfr1086	Wfdc17	Ccna2	Fam110c			Tgm2
Acot1	Cox10	Cfdp1	Gdf3			Kmt2a
Slc9a8	Aatk	Rangap1	Aldoc			Scaper
Plk2	Timm13	Pcdh11x	Ecscr			Ldhb
Pdlim1	Sms	Dhrs13	6330562C20Rik			Dcaf11
Ift43	Map3k6	Scin	9330175E14Rik			Irf1
A530010F05Rik	Cwc25	Ube2m	Rin2			Csad
Micall1	Ptpn23	Rasgef1a	5330439B14Rik			Ppp1r16b
Pik3cd	Tmem125	Wdr18	Igf1r			Dus2
Nr4a2	Mrpl13	Rnf5	Stx7			AW112010
Rbbp9	Cnot6	Irf2bp2	Pear1			Gba
Kmt2a	Msh3	Il17ra	Pxn			Prr13
Cdc23	Hjurp	Tmem92	Adam1b			Use1
Rarb	Serf2	Pcmt1	Ttc14			Taf7
Olfr510	Rnf182	Selo	Cd302			Ephx1
Agt	Atp13a1	Uhrf1bp1l	Fam45a			Ftl1
Tgfbi	Adm2	Lrrc16a	Ikzf4			9530082P21Rik
Pggt1b	Cep83	Wdr74	Zfand3			Acot2
Shank3	Psca	Polr2f	H3f3b			Porcn
1700061E17Rik	Fes	Nsmce4a	Gm3106			Erg
Arl3	Scrib	Uck2	Rmnd5b			Actb
Pigp	Polr1e	Dpysl4	Trappc9			E130102H24Rik
Kdr	Rmi2	Psmd13	2410006H16Rik			Lyrm5
Slc6a20a	Fcer1g	Ccnf	Ptprcap			Pard3b
Dirc2	Fus	Cotl1	Ier2			Otub1
Xk	Scap	Shc4	A530032D15Rik			Tcp11l2
Stat3	Gpbp1l1	Dbr1	Clstn3			Pnpla7
Gatsl2	Map1a	Cplx3	Psme1			Amz2
Ppp1r9a	Psma2	Olfr608	Elf4			Saraf
Adgrl4	Aldh9a1	Cpsf2	Gm9493			Arhgdib
BC089597	Cwc15	Ska1	Rnf185			Fbxo44
Eya2	Pola2	Cox5b	Insr			Pnp
Map1lc3b	Lyve1	Atp5g1	Clip3			Vdr
Cog6	Mfsd9	Spta1	Gm16618			Frmd4b
Dnajc3	Hdac2	Gemin6	Fpgt			Ppm1h
Plekhm1	Nmral1	Ndufb4	Rbpms2			Myof
Impact	Pcdhgb2	Zbtb45	Maff			Ccrl2
Zbtb14	Hspa1b	Cox4i1	Rgs18			Mfng
Aldoa	Baz1b	Polr3c	Vamp5			Dph5
Pafah1b1	Uqcrq	Dnajb6	Rpl8			Crebl2
Gucy1a3	Ass1	Pdf	Ifit1			Pak1
Gm26624	Ggt7	Tcof1	Klhdc1			Nudt12
Pim1	Tuba8	AI427809	Pdgfb			Tlr4
Gramd1c	Pirb	Gm128	Kcnb2			Nadk2
Jsrp1	Cgnl1	Trnp1	Nfix			Tnfaip8
Gm16014	Gapt	Sclt1	Znrd1as			Pecam1
Spry1	Il33	Ltv1	Clpb			Tox
Plin3	Slit3	Aspm	Smad4			Glul
Lcn5	Btnl9	Cenpn	Lcp1			Sash3
Cd164l2	1700052I22Rik	Ttc13	1700037C18Rik			Fam129a
Atp8a1	Hnrnpu	Fam111a	Fut10			Tmsb15l
Mthfsd	Fbll1	Rrs1	Ccndbp1			Dusp2
Malat1	Flot1	Ahsa2	Vasp			Enpp5
Prkce	Plppr3	Serp1	Itm2c			Gpr171
Exoc3	Gm13151	Steap3	Terf2			Slc50a1
Ddx20	Map4k1	Slc26a9	Adtrp			Foxo3
Rab7	Plcz1	Nek10	Pianp			Smim24
Gm43698	Fxn	Lyst	Lpar6			Cdkn1b
Rmnd5b	Plekhf1	Prom1	Pef1			Tmem176b
Dzip3	Mthfd1	Npc2	Armc12			Uba7
Itgae	Cox4i1	Mrps14	Nkx2-3			Obscn
Gm3411	9330151L19Rik	Tmsb10	Rps19			Ccndbp1
Rhoc	Cnp	Ccdc96	Eya1			Por
A930005H10Rik	Mif4gd	Sval1	Aph1b			Anxa5
Il21r	Sec61b	Atad5	Ctsf			Selenbp1
Zfp456	Cox5b	Wsb1	1110012L19Rik			Tnfrsf1a
Gm42709	Il1r1	Pop1	Crebl2			Fxyd5
Dhrs11	Jakmip1	Sf1	Pea15a			Ifi44
Sdhaf2	Farsa	Taldo1	Rgmb			Fcgrt
Rybp	Ncaph	Acsl5	Exd2			AA986860
Elmo1	Cox7a2	Gtpbp10	Gbp5			9130008F23Rik
Fkbp7	Bik	Pa2g4	Limd2			Mxra8
Numa1	Pgd	Sms	Cited2			Map1lc3b
Tomm34	Ndufs6	2310061I04Rik	Irf2			Txnip
Fcgrt	Sel1l2	Grm1	BC031181			Runx1t1
Dusp1	Pole2	Clec10a	Plxna1			Mdh1
Sgcg	Emb	Vrk1	Cx3cl1			Prkaa2
Wfdc1	Hcst	Cpox	Zbtb20			Renbp
Rps10	Ccdc62	Gm27153	Ctdsp2			Eef2
Pnpla8	Pspc1	Endod1	Hdac11			Dph7
Capg	Alpk3	Dock8	Reep3			Tspan31
Tapbpl	Cmip	Nobox	Smcr8			LOC171588
Pttg1ip	Lat	Gm16286	Fam84b			Aldoa
Lrrn4	F630028O10Rik	Mrps5	Hspa12b			Gpr56
Atp6v1d	Adam17	Xylt1	Rpl13-ps3			Mill2
Pdgfra	Slc38a5	Ube2c	Pld1			Sqstm1
Terf2ip	Nup107	H2-Ob	Rtp4			B2m
Apol9b	Gata5	Sod2	Cdkn1b			Tmem167b
Cpq	Gm5591	Bag1	Glis2			Prom2
Prr5l	Rad51c	Ctsa	B4galt4			Spry2
1700034G24Rik	Stmn4	Sox2ot	Prl2a1			Tctex1d2
Zfp36l2	Mcpt8	Hjurp	Map3k9			Tcn2
Nefh	Zfp523	Lrp8os3	Wbp2			Cyb5a
Gm28040	1700057H21Rik	Gm16272	Vpreb2			Ica1l
Atn1	Gm17705	Slc16a6	Ypel3			Eef1a1
Tcrg-C4	Gm1604a	Atxn7l1	Igf2r			Lpin1
Vegfc	Ppp2r4	Atp6v0c	Insig1			Nr1d1
Asap3	Ube2e3	Rbx1	Invs			Pla2g16
Frs3	Hspe1	Zfp605	Rorc			Hsd17b10
Cyth4	Gm17750	Srpk1	Atp11a			Hgfac
Padi4	4930453N24Rik	Armcx4	Cd2ap			Art4
Fam181b	Ikzf2	Utp14a	Dlg2			Rps3a1
Dtx3l	Wdr31	2700038G22Rik	Maged2			ENSMUSG00000089726
Morc3	Oog2	Rheb	Rbm18			Gatad1
Dlgap4	Mbd3	Cxcl1	Tmtc2			Txndc17
Zfp449	Nmnat2	Noa1	1500015O10Rik			Ubl7
Glis2	Aunip	Fbxo5	Calcrl			Rpl7
Rcn3	Xrcc1	Add3	Eva1b			Gstm5
Vmn1r31	Ercc6l	Sumo3	Fnbp1			Osgin1
B930041F14Rik	Psmb5	Lyar	Tmem37			Pcbd1
Nlgn2	Baz1a	Gm13814	Diaph1			Prune2
Vps37d	Lpcat2	Nubp1	Mtmr10			Npepps
Ifitm7	Cdca2	Plekhf1	Zfp111			Gprasp2
Sec14l2	Zranb3	Ttc17	Upp2			Rbbp9
Fastk	Pmaip1	Ccdc178	Jade3			Osbpl1a
Otub2	Actl6a	Ube2k	Mbd6			Icam1
Zfand6	Mical1	Sf3a3	Arhgef3			Tmem141
Trove2	Arhgef18	Mtus1	Gm13346			Cln3
Afap1l1	Mxd4	Psmd10	Nrxn1			Cyp2j6
Ttc14	Bmp10	Sec11c	Chil5			Maged1
Tmod3	Fhl5	Gm16170	Adgrg6			Phpt1
Rnf26	Ccdc68	Slc16a11	Ptprm			ENSMUSG00000086179
Nmt2	Ncapd3	Psma7	Nr4a2			Pglyrp2
Acp6	Wdr83	Ankrd10	9530082P21Rik			Acaa2
Trim34a	Hspa12a	Fcho1	Ehd4			Pml
Wfikkn2	Gm29507	Polr2j	Slc37a1			Abhd14a
Chpf2	Gssos1	Cox17	Akt1			Tceal1
Tmem120b	Rpl28	Klhl34	Bicd1			Tpp1
Tmem40	Med25	Arl11	Tmem38b			4930481A15Rik
Rtcb	D5Ertd605e	Pecr	R3hdm4			Meis3
Stard4	Ano5	Mpeg1	Habp4			Chil5
Arhgef12	Rpa1	Platr6	P2rx1			Stambp
Sla2	Ddx21	Galk1	Abcb1a			Gstt1
Coa7	Ppp6r3	B4galnt1	Srgap3			Matn4
Ccl27a	Myeov2	Zfp101	Pkia			Cpne8
Taf7	Vrk2	Brip1	Ifi44			Dkkl1
Gm20089	Ndufs5	Kel	Csad			Snrpn
Abcb9	Rad21l	St3gal3	Slc18a2			Ly9
Smcr8	Slc29a1	Med30	Foxk1			Cd302
Tspan9	Gm28548	Gm26523	Golgb1			Ssh3
D330041H03Rik	Ifnlr1	Lsm8	C2cd4b			3110043O21Rik
Xpnpep3	Gm44854	Dhrs13os	Gm11131			Hhat
2700081O15Rik	Seh1l	1700122D07Rik	Tmco4			Slc26a11
Snhg8	Il1rl1	Bzw1	Gm1123
Nab2	Tmem217	Gm13485	Tagln
Fancd2os	Mif	Pi4k2b	Wt1
Cyp2c44	Vrk1	Fech	Rbfox2
Pcdhb18	Arhgef1	Sdcbp2	Fchsd1
Mmp16	Dock11	Mrvi1	Eid2
Eif1	Alad	Mrgprd	Frmd4b
Mmd2	Lsm7	Tmem150cos	Gm11961
Prp2	Rpl8	Cenph	Prrc2b
4931422A03Rik	Paox	Efcc1	St7l
Trmt11	Uqcrc1	Foxe3	Ski
Cyp4f13	Mob3a	Map2k6	Sdc4
Olfr1532-ps1	Sdhb	Cstf2	Gata3
Gypc	1700003D09Rik	Gpn3	Msmo1
Klhdc10	Nek2	Slc26a1	Arf3
Sqrdl	Atxn7l1	Prim2	Nmur1
Eef2	Rassf1	Ago2	Il16
Eid2b	AI504432	Itpa	1810011H11Rik
Galnt12	1700030M09Rik	C1qbp	Spry1
Zfp407	Bsn	U2af1	Gm9958
Zdhhc17	Ppp1r14b	Abca9	Snap29
Alcam	Stk16	Aim1l	Panx2
Eif1b	Esco1	Hdhd2	Cfap36
Dennd2a	Zdhhc13	Agtr1a	9230114J08Rik
Lama3	3110001I22Rik	Phgdh	Prr5l
Galnt7	Hacd1	Hmha1	Ergic1
Uap1	Adamts13	Chd3os	Zbp1
Sis	Sumo2	Psenen	Gpx8
Osgin1	Selo	Cisd1	Skap2
Ppp1r18	Parvb	1700063A18Rik	Armc3
Lamp2	Tubd1	Glrx5	Tmem237
0610009E02Rik	Galnt1	Gm11772	Nefh
Serpinb6a	Ceacam18	Kremen1	Mroh7
Pfkp	Phgdh	A730020E08Rik	Crtc2
Ece1	Edil3	Gm37041	Slc39a6
Actr3b	Smap1	Gm26839	Cd177
Sema4b	Rcc2	Serpinb5	D330050G23Rik
Plxna1	Olfr1020	Hgh1	Nfic
Rasl11a	Slc12a9	Naip1	Id2
Pdgfd	Snrnp70	Gtse1	Gprasp2
Cxx1a	Pqbp1	Clp1	Gpr157
Ctsh	Gm16336	Jakmip1	Neurl1a
Cpd	Zyx	Ptbp1	Dnajc3
Trim12a	Gm37214	Mis18bp1	Sorbs2
Msantd1	Sox2ot	Zan	Terf2ip
Rps13	Ccdc163	Ubc	Rras
Pla2g4a	Cherp	Gm15581	Rab40c
Plch1	Carhsp1	Gdpd5	Aff1
Ap4b1	Gdpd5	Bzrap1	Krt32
Smtnl1	H2-M1	Gins1	Lbh
Fscn1	Acsbg2	Slirp	Pitpna
Skp1a	Pop1	Pcnx3	5330417H12Rik
Irf2	Exo1	Csf2rb	Zfp324
Calml4	Ndufv1	Muc6	Ltf
Rhbdd2	AK157302	Npepps	Etv6
Myadm	Six3	Dlat	Bak1
Rpl6	Jmjd4	Apool	Eml4
Vasp	Gxylt1	Alg5	Cdipt
Ebpl	Car6	Srsf6	Zmynd11
Tnks1bp1	Tomt	Arhgef39	Trip10
Dock9	Commd5	Gp6	Crim1
Ift57	Sod1	2610020H08Rik	Crtap
Gm13546	Lrrc8c	Bmx	Gm10735
Lpp	Tcf3	Bsn	6030498E09Rik
Evi5	Marcksl1	Chchd1	Akap10
B3gnt8	Lars2	Mis18a	Spink6
Phf1	Hadhb	Ccdc12	Ampd2
Csde1	Kdm2b	H2-Q6	Teddm1b
1600025M17Rik	Cyb561d1	Eif2s2	Atp6v1d
Gm10369	Dynlt1a	Gpr26	Msantd4
Gm15083	Sf3b4	Pptc7	Fzd1
Zcchc24	Chil4	Lrpprc	1110037F02Rik
Pcsk7	Pi4k2b	Rfc3	Arhgef26
Pcf11	Coa3	Phf5a	Ntrk2
1700048O20Rik	Ppp1cb	Zfp740	Cdc34b
Ifit3	Gm20546	Pcdhgb2	Eef2
Pkd1	Hsp90ab1	Shmt2	Klhl7
Rhoq	Ugdh	Sympk	Tcf25
Wars	Cep128	4930505N22Rik	Rit1
Dlx4	Hist1h2aa	Scn2b	Serinc3
Vipr2	Tnfaip1	Gtpbp1	Prdx6
Dag1	Rbfa	Alad	Rhbdf1
Rab20	Gad1os	Il1r1	Fermt1
Adprh	Wnt8b	Anapc5	Ticam1
Spo11	Ttc39d	Ly86	1700023C21Rik
Insr	4930579C12Rik	Hypk	Il22ra2
Gpr108	C630028M04Rik	Kif14	4922502D21Rik
Fam107a	Kcnj5	Parp1	Uchl1
Tceal5	Blm	Anp32b	Tmem140
Lamb2	Clec11a	Mical2	Bbs1
Unc5a	Metrn	Aunip	Dlg5
Rnf185	Sfpq	Fam64a	Rab11fip3
Prpsap2	Trem3	Rin3	Ppp1r11
Mtmr1	Atp6ap2	Mettl8	Tmem158
Itga2	Fitm1	P2ry10	Fcor
Rtp4	Hist1h2bc	Gm43920	Chpf2
Mctp1	Cd5l	1700009C05Rik	Pqlc2
Utrn	Abca7	Olfr283	Prkacb
Vamp4	Cox8a	Dock11	Ifi203
9430076C15Rik	1700027F09Rik	Wdr24	Rcn1
Gm12301	Snrnp25	Sh2d4b	Abi2
Gcnt2	Gm15672	Efcab11	Tmem94
Lypd5	Lyar	Gm10857	Tnfaip8
Gm17396	Mis18bp1	Eed	Ankrd13d
Isg20	Coro1a	Frg1	Pdlim5
Maged2	Ccdc124	Dsn1	Inppl1
Il4	Olfr1324	Cab39	Ddit4
Gpr180	A730098A19Rik	Gm17521	Gm16675
S100a11	Eno4	Prc1	Gm16519
Smim7	Cp	Trim65	Tlr8
Arid1b	Tbrg4	Avpr1a	Gm19301
1700007B14Rik	Mars2	Drg1	Wdr44
Oasl2	Rps19bp1	Krtap19-5	Syf2
Ift88	Olfr570	Sema5a	Srxn1
Bhlhe40	Polr2i	Ubn1
Ankrd55	Zfp119a	E2f4
Ankrd63	Galnt10	Ppp1r14b
Ptov1	C4a	Wbscr25
Foxred2	Pgm3	BC055324
Gm16262	Tmem205	Tekt4
Uqcrh	Mtpn	Psmb4
Arhgap28	Gm16091	Olfr389
4930413E15Rik	Fam189b	Gtf2e2
Lamp1	Sipa1l2	Cxcr4
6030442E23Rik	Wdr48	Fbxw4
4931406P16Rik	Dohh	Olfr1388
Adm	Cenpp	Fsbp
Akap10	Gm13872	Bclaf1
Ifit1	Dock10	Mrpl36
Gm44992	Zfp217	Ak6
Adgrg2	Csrp1	Aga
Gm12216	Abcb4	Med8
Igsf11	Sapcd1	Nt5c2
Hspa5	Hpgd	Klkb1
Neto2	Fam78b	Clnkos
Phf11d	Calca	Tmem119
Fbxo16	Olfr283	Cldn16
Gm26600	Cxcr4	Nr1i2
Cd302	Fam221a	Arl6ip6
Prrg2	Lamtor4	Eif3j1
Slc12a2	Fam105a	Tceb1
Def8	Mtif2	Agpat5
Tnpo2	Hnrnpc	Atp5a1
Eva1b	Fndc3b	Dmpk
Sacm1l	BC028528	Hk3
Trim5	Zmynd19	Ppp1r37
Abcb1a	Prps2	Cnn3
Cdc42bpb	Gpr3	Il12a
Fam107b	Tbx21	4930579D09Rik
Car2	Tnfaip8l2	Pamr1
Apoe	Shfm1	1700030A11Rik
Gm4841	B020004C17Rik	Spata2
Stau2	Srpk2	Acsm3
Scrn1	Olfr1508	S1pr3
Hmgb4	Itgav	Olfr121
Mill2	9530051G07Rik	Ska3
Gpt2	Med9	Efr3b
Selenbp1	Atp5h	Nt5dc2
4933406M09Rik	Taf1c	Tmbim6
Bcas1os2	Ticrr	Naa40
Nbeal2	Ikzf1	Dlx6
Nab1	Gm12462	Rgs9bp
Nfkbiz	Olfr297	1700039M15Rik
Ubb	Pcna	Ints7
Tpp1	Dph7	Gm21750
Klf4	Gm37459	Myocd
9130008F23Rik	Slc1a5	Farsb
Olfr493	Casp3	Pcx
Qrich2	Iqgap1	Cldn34b2
Vpreb2	Phip	Cd53
Abca5	Atxn2l	Mettl17
Chpf	Acvr1b	Nol6
Tnks2	Idh3g	Mphosph9
Abhd5	Gng10	Rrp1b
Dbndd2	Mettl6	Acot10
Agpat4	Tfap2b	Suclg1
Ppp1r11	Ubxn1	Psmb5
Ccdc74a	Tspan18	Wdr46
4930428O21Rik	Tyk2	Gm35507
Srpr	Dhrs9	Gm26773
Nsg1	Gm20757	Msantd2
Reep3	F8	Gars
Gm13112	Dbf4	Ncf1
Rin1	Cndp2	Alyref2
Insm1	Dtx4	Ccsap
Morf4l2	BC030867	Gadd45a
Rplp2	Psmb6	Ptges2
Gm10030	Gm15324	Zranb3
Gm26774	4930578C19Rik	Bdp1
Grik5	Isyna1	DHRSX
Sfxn5	Olfr744	Cfap20
Abca15	Rnps1	Unc5c
Xbp1	Atox1	Entpd6
Ifnab	Ltbp2	Slco3a1
Rps15a	Inip	Sars2
Olfr308	Gm21847	Olfr828
Tmem8	Csf3	Mrps35
Cdh1	Uck1	Cdca2
Crispld1	4932414J04Rik	Rad21
Zfp616	Ppm1g	Gas2l2
Rnd2	Serpinb1b	Gpc4
Tlcd2	Gm12295	Polr3k
Fam134b	Unc5c	Ccng2
Ctnnd1	Rbmx	Inhbb
Tmem55b	Foxk2	Papss2
Erg	Sae1	Bccip
Ifi44l	Gm7538	Gm45229
Stk3	Mal	Wdsub1
Rgmb	Mapre2	Arl6ip4
Timp2	Trim59	Arhgap44
Asb13	Olfr190	Olfr1085
Prrc2b	Sap30	Psmb2
Exoc3l	Spink11	Mettl18
4930505K14Rik	Galk1	2900005J15Rik
Snx6	Lsm8	Prmt3
Zfand3	Chrna6	Akirin2
Mast4	Napsa	Gm20753
Rps12-ps3	Dnah8	Lrp8
Dync1i2	Nudt7	Lrrc59
Tfec	Heatr6	U2af1l4
Olfr971	Eme1	Ptgr1
Anks6	Hist1h1b	Dennd5b
Olfr957	Fancd2	Yy2
Aldh4a1	Casp7	Luc7l3
Gm43146	Rangap1	Fscn3
Lpcat3	Clec4f	G0s2
Ikzf4	Eef1b2	Gm26521
Dnali1	Trim42	A530058N18Rik
Vps26a	Gar1	Scgb3a2
Ccl20	Tmem151b	Arl2bp
Tie1	Tmem256	9130401M01Rik
Olfr1055	Eif2s1	Wdr43
P3h4	Reep5	Gm16055
Lrpap1	Cds2	Recql4
Srebf2	Ank3	Cdkl5
Ripk1	Iglv3	G6pc2
Crtc1	Chtf18	Usp14
Ahr	Peg3	Abcb4
Fpgt	Inpp5f	Gtf2ird1
Trappc9	Ppp2r5b	Cnot6
Snx15	Sf3a3	2610028H24Rik
Olfr1495	Mgat3	Clec5a
Kif23	Cux1	Dhfr
Gm42372	Kif15	Ankrd34b
Sepn1	Sympk	Cks1brt
Gm26753	Pprc1	Wnt7b
Mib1	Dpp4	Dscc1
Tmem106b	Aurkb	Mybl2
Cdc42bpa	B4galt1	Gapdhs
Gm11749	Spata22	Mfsd6l
Smim14	Vars
Eif4b	Csrnp2
Slc19a1	Tbc1d22bos
Vmn1r236	Tmem129
1700012I11Rik	Lrrc8dos
Dmxl2	Dhfr
Mpp6	Bmp15
Gm43645	Gp5
Stx4a	Dhx9
Duxf3	Scnn1g
Trpc6	Mta3
Orai1	Ubl4a
Pi4ka	Olfr398
Gm17430	Ak6
Fam184a	Tprn
Idh3b	Cfap74
Kirrel3os	Gprc6a
Gp2	Gm11697
Gfi1	Tpx2
Epm2a	Vmn1r203
Cdk14	Gm43735
Ttc39b	Cyp2d26
Cd276	Cdk5rap2
Ctf1	Drg1
Atpaf1	Arhgap22
Hnrnph3	Prmt7
AI314180	Phf23
Tjp2	Tmed2
Hdac9	Spn
S1pr1	Arhgap30
Frmd4b	Duxbl3
1500009C09Rik	Cxcr2
Plekha5	Grm6
Gm4981	Ndufs8
Slc46a3	Hacd2
Ccdc126	Rcc1
Gm30459	Ttll3
Sash1	4731419I09Rik
Ar	B4galt7
Rbbp7	Gm14488
Dydc2	Zc2hc1c
Olfr1329	Zfp513
Atf2	Dmxl1
Mcfd2	Cd7
Gm15411	Mcpt2
2410018L13Rik	Necap2
Nfic	Olfr944
Cyct	Trappc12
Rab11b	Tmem208
Prkag2	Als2
Traf6	Hist1h2ao
Sycp1	Pdx1
Exd2	Rbm25
D930016D06Rik	Snapc4
1190005I06Rik	Cchcr1
Fuz	Alpi
Hpcal1	Fcgr3
Otud6b	Cfb
Triml1	Hyal2
Vmn2r1	Epha6
Pfdn5	Xlr3c
Gm20707	Oxgr1
Ifit1bl1	Vmn1r209
Lonp2	Trp53rka
Ugt2a3	Grhl1
Fut8	Tec
Prickle1	Slit2
Wipf2	Gm11267
Tcf4	Scarb1
Cadps2	Ncapg
Nts	Cacng5
Ylpm1	Hist1h1d
4922502D21Rik	Ephx2
Mtmr11	Gm20681
Peli2	Pitx2
Gm5089	Glrx5
Tmem9	Cyp2s1
Myh10	Blvrb
Plekhg6	Cep350
Stxbp4	Fanci
Batf2	Zfp277
Ctla2a	Dsn1
Fkbp10	Prkdc
Nol12	Pole
Olfr235	Ctla4
Adam1b	Gm37468
BC147527	Cdc5l
Tnfaip8	Hhex
1700040F17Rik	5830468F06Rik
Aco1	Rgs10
Rnf4	Elmod2
Wdr41	Twistnb
Ndnf	Cacna1g
Hebp1	Olfr547
Avpi1	Gpc6
Eif4e	Rell1
Eaf1	Sytl1
Arf4	Prim2
Rsad2	Senp8
Galc	1700001N15Rik
Parp14	Incenp
Gas6	Hdhd2
Clstn3	4930555O08Rik
Glra3	Ogn
Asphd2	Bmpr1b
Erp27	Olfr1353
Ccdc17	Klhl31
Gm10392	Kcnip1
Lpar4	Elovl5
Chil5	Lpar2
5430416O09Rik	Os9
Apoh	Hsd11b1
Olfr186	Pole4
Dkkl1	Atp5l
Mllt6	Gm44514
Rgs7bp	Hnrnpa1
Olfr1392	B3gnt5
Rhox13	Gm32950
4930521E06Rik	Suz12
Anxa6	Trp53inp2
Cacna1d	Nanos1
Camk2n1	Evi2b
Fkrp	Ndc1
Unc13d	Cmc2
1500026H17Rik	Platr26
Gm44597	Naa10
Cftr	Slc2a9
Pkd1l3	Cdc45
Jrk	Ugt2b37
Olfr31	Eif3j1
Gm7271	Ube2ql1
4732414G09Rik	Csnk2b
Fmo5	Gm17611
Arhgef5	Ccdc47
Ubox5	Gm13558
Wt1	Capzb
Msrb2	4930570N18Rik
Pcolce	Prrt2
E2f5	Alox5
Apba2	Glud1
BC107364	Ccp110
Olfr177	Apaf1
Morc2b	Me2
AC149090.1	Dazap1
Gnaz	Nubp2
Ndfip1	Cyp2c40
Pkdrej	Hnrnpa0
6030469F06Rik	Smpd4
Osbpl9	Gif
Zbtb3	Bclaf1
Tprg	Hscb
Ncdn	Poc1a
Uaca	Iqgap3
Gm20559	Tpcn1
Vwa5a	Rad51ap1
Pla2g16	Pdp2
Gm13012	Hira
Guk1	Pabpn1l
Fpr1	Got1
Vat1	Ascl5
Samsn1	Spag9
Ngfrap1	Uba2
6430550D23Rik	2310058D17Rik
Jag1	Snhg5
Etohd2	Olfr78
Rab38	Myl12b
Dimt1	Rxfp4
Pgrmc1	Srsf3
Cfap77	Lrrc10b
Vkorc1	Ccdc174
Abcc1	Snrnp48
Mtus1	Stpg3
Dstyk	4930535O05Rik
3100003L05Rik	Uchl5
Zbtb43	Shmt2
6030498E09Rik	Cox19
Sfxn3	Snx5
Hbb-bt	Clec5a
Acy3	4930595D18Rik
Calcrl	Bcl10
Ptpn21	Tst
Fli1	Gm45169
Vwde	Pdap1
Arpin	Rem1
2410012E07Rik	Mrpl1
Mcl1	Insm2
Mettl24	Rpn1
Pdzd2	Olfr1330
Skiv2l2	Kcnk12
Cyp8b1	B3gnt2
Gm11714	Atf6b
Znfx1	Cenpi
Fbxo10	Cxcr5
5730480H06Rik	Gm21865
Gpr132	Samd4
Nr4a1	Nadk
Tshz1	Ankrd44
Ext2	Lrwd1
Igkv10-96	Mcoln3
9330185C12Rik	Gm2042
Srsf5	Olfr1510
Pgap2	Trav9-4
Fam129b	Arl6ip1
Shroom4	Dhps
Tmem181a	Suds3
Slc16a2	Gm14228
Samt2	Psg29
Gdpd3	Agpat5
Cldn34b1	Dhrs4
Kmo	Fbxo25
Tcf25	Vamp8
Helq	AW011738
Fam234a	Gm8797
Nhlrc4	Mkrn2
Klrb1c	Prss50
Tmem134	Unk
Amigo3	Mfsd10
Cyp11a1	Abca8b
Serpinb8	Pkd1l2
Rhobtb3	Atp5f1
Kdelr1	Fbxl6
Pde4dip	Prps1
5330411O13Rik	Pfdn6
Gm12764	Spaca1
Fam178a	Rhcg
Cdc42se2	Rps2-ps6
Zfp28	Ddx49
Pax6	Vstm4
Mettl25	Serpinc1
Klhl21	Gak
Toe1	Slf1
Gm16104	A430093F15Rik
Pkd2	1700016G14Rik
Wbp2	Tsc22d4
Vcpkmt	Hey1
Olfr1472	Phf5a
Ndst1	Piga
Ifnb1	Rad54l
Hspa12b	Myo1b
Fam160b1	Cdca3
Lrrc55	Nexn
1810013L24Rik	4933404K08Rik
Vmn1r13	Tmprss3
Prdm16	Nrbf2
Faf1	Il31ra
Asb5	Ezr
Slc31a1	Nr2c2ap
Rps6	Card14
Ubr3	Sgtb
Sh3bgrl2	Olfr134
Luzp1	Clta
Ube2l6	Aimp2
Pik3ip1	Prr22
Trdc	Ipo5
Cebpb	Prph2
Wnt2b	Olfr689
Mobp	Gm19667
Fgd1	Gm26571
Bbx	Stard3
Pwp1	Tectb
Amacr	Polr1d
2610305D13Rik	Adam33
Lats2	Clec4a1
Olfr103	Slc12a6
1700060J05Rik	Tomm22
Il1rapl2	Lin9
Panx2	Dclre1b
Dcun1d1	Mapre1
Cbarp	Mrpl12
Cfap70	Hirip3
Olfr1056	Pin1
Lipn	Gm16576
Ccdc190	Gm4890
Plekho1	Rnase13
Upp1	Rrs1
Dync2li1	Lrch1
Ppdpf	Nono
Calcoco1	Haus3
Scfd1	Tfap2c
Nfat5	Rnf214
Arhgef25	6430628N08Rik
Robo4	Uqcr11
Tfpi	Ap1g2
Lrrc47	Syt6
Dnajb9	Olfr1262
Plscr2	Ogdh
5033403H07Rik	Cdc34
Slc25a36	Myl12a
Rbm3os	Cldn6
Ddit4	Znrf2
Dctd	Hnrnpa3
Ampd3	Arhgap27os1
Arxes1	Avpr1a
Ptprj	Cfp
P3h3	Mettl7a3
Ubxn6	Mtf2
Atf7ip	Agtr2
Tspan13	Wnt2
Ebag9	Mrps36
Hist1h3d	4930483K19Rik
Rab29	5430427O19Rik
Tcf20	Foxj1
Nfe2l1	Rpl18
Foxj2	Abcg5
B4galt4	Rufy4
Gm42875	Snrnp40
N4bp2	Cd180
Zfp148	Ttc7
Gm15356	Defb34
4930445B16Rik	2700060E02Rik
Ric8b	Tmed9
Sall2	Pip5k1a
Pex12	Gm14015
Gm16853	Dhx37
Tvp23bos	Ugcg
Hrk	Naa25
Plcg1	Cpb2
Tgtp1	Ube2l3
Olfr424	Gm21975
Cisd3	Ect2
Zfp653	Smc4
Tifa	Hist1h2ak
Xlr	Olfr1200
Mt2	Gm13199
G2e3	1700022E09Rik
Defb45	Caap1
Akr1c13	Gm15819
Tmem38b	Mark2
Enox2	Pmf1
Gm44174	1700123O12Rik
Olfr1053	Ambn
Gbp9	A730045E13Rik
1110018N20Rik	Nrp1
Hunk	1700020L24Rik
Prpf40b	AY512915
Klhl4	4930502E09Rik
Noc3l	Olfr723
Tubb4b	Fam227a
Zfp521	Gm12743
Pgm2	Mtf1
Crtap	Hdac4
Atxn7l3b	Pabpc4
Gm38112	Ly86
Lrfn5	Susd1
Aven	Mbtd1
Socs5	Vmn1r216
Gm15601	Ly6c2
Foxd2	Primpol
Sfrp1	Fbxw4
Slc6a6	Tomm20
Cdkal1	Olfr1226
Trim6	Nde1
A930038B10Rik	Trim16
Tmem9b	Pcid2
Chrm5	Fam151b
Vcpip1	Mmp24
Cep57	Pate3
Slc4a9	Ppp4c
Golga1	9330162B11Rik
Plod2	Ccdc178
Mug2	Ssb
Phyh	Pes1
Slc25a20	Slc35c2
Eci3	Epha4
Ip6k1	Arpc3
Trnp1	Pno1
Fam3b	Cct2
Gm26548	Atp8a2
Cdh4	Cfap126
4931406B18Rik	Psmg2
Igkv12-89	Pbk
Ank	Mdc1
Sbspon	Dbn1
Coro2b	Park7
Slc25a14	Gm9780
Aprt	Fut7
Lima1	Plcd1
Fkbp9	Smox
Tbc1d4	Atp4b
Ttll7	Hacd3
Fosb	Rasl10a
Apobr	Mrpl36
Arrdc4	Olfr1461
Gm15336	Gm15684
E330009J07Rik	D430042O09Rik
A330070K13Rik	Nox1
Tle2	Efr3b
Gm14393	Banp
Tnr	Apcdd1
8030423F21Rik	Ighv8-4
Fam174b	Xkr4
Insl6	Il13ra2
A530058N18Rik	Lrrn3
Jade2	Kndc1
Sap30bpos	Gpsm2
Ttc3	1700001J04Rik
Calml3	Adam8
Pom121l12	Gm16759
Tgtp2	Ccdc32
Sugp1	Gm816
Adrb2	Dpyd
Bbc3	Apoc1
Kcnmb4os2	Sf3b1
Il27	Csnk1g2
A730081D07Rik	Purb
Ang2	2310031A07Rik
Gm14420	Eif3h
Slc38a9	Rexo1
Tnp1	Hnrnpul1
Camk2a	5530400C23Rik
Tbx3os1	Zscan10
Parp16	4931403G20Rik
Gal3st3	Mast3
Cmas	Cdv3
Dexi	Cel
Fas	Mfsd11
Stk11ip	U2af1
Tmem237	Gm44796
4930445N08Rik
Trim44
Csrnp3
Lcp1
Zfp287
Apobec4
Mstn
Clec2e
Gorab
2610042L04Rik
Cops8
Foxl2
2010016I18Rik
6030443J06Rik
Krt87
Aqp5
Spink14
Ighv5-6
Akap2
Spint2
Lpgat1
Gpr34
Zmpste24
Upp2
Ftl1
Olfr622
Bmpr2
Zfp637
Olig3
Atrnl1
Naip2
Atp6v1a
Gm16070
Uba6
Ncam2
Flot2
Tmtc3
Rgl1
Hoxb7
Mag
Adgrd1
Krtap4-9
Cyp2c39
Elmod1
Ldlrad2
Gm1043
Lynx1
Pdlim7
Rltpr
Rras2
Gm26512
Esr1
Ifit2
Fasl
Nox4
Tcf7l1
Gys1
Kbtbd7
