# Supplementary material for: External signals regulate continuous transcriptional states in hematopoietic stem cells
Source: eLife. 2021 Dec 23;10:e66512. doi: 10.7554/eLife.66512 (PMC8700284; doi:10.7554/eLife.66512)
Supplement: Supplementary file 6. — Over-representation analysis for genes induced by external stimulants or enriched in single-cell RNA sequencing (scRNA-Seq) clusters (top 3–5 pathways shown for each database or curated pathway set with adjusted p-value < 0.05). Granulocyte colony-stimulating factor (G-CSF) has an additional tab listing all enrichments (including adjusted p-value > 0.05) of curated pathways. [file elife-66512-supp6.xlsx]

## Sheet: cluster_HSC
Cluster	Origin	Pathway	Gene Overlap	Adjusted P-value	Gene names
Metabolism	GO:0034641	cellular nitrogen compound metabolic process	71/6201	9.8e-15	['Ran', 'Eif5a', 'Mif', 'Ncl', 'Ppia', 'Nme1', 'Pfn1', 'Hsp90aa1', 'Eif4a1', 'Srm', 'Set', 'Atp5g1', 'Hspd1', 'Ybx3', 'Hsp90ab1', 'Hspa8', 'C1qbp', 'Pa2g4', 'Nop10', 'Npm1', 'Ybx1', 'Hnrnpf', 'Dctpp1', 'Cct3', 'Fbl', 'Srsf2', 'Snrpd1', 'Cdca7', 'Nhp2', 'G3bp1', 'Dkc1', 'Cdk4', 'Cct8', 'Banf1', 'Aprt', 'Apex1', 'Cnbp', 'Mcm6', 'Mrpl12', 'Atp5b', 'Mcm3', 'Snrpd3', 'Sumo2', 'Nolc1', 'Snrpb', 'Pebp1'…
Metabolism	GO:0044237	cellular metabolic process	88/10350	6e-14	['Ran', 'Eif5a', 'Mif', 'Ncl', 'Ppia', 'Nme1', 'Pfn1', 'Anp32b', 'Slc25a5', 'Hsp90aa1', 'Eif4a1', 'Srm', 'Set', 'Atp5g1', 'Hspd1', 'Ybx3', 'Hsp90ab1', 'Hspa8', 'C1qbp', 'Pa2g4', 'Nop10', 'Npm1', 'Ybx1', 'Hnrnpf', 'Phgdh', 'Dctpp1', 'Cct3', 'Ppp1r14b', 'Fbl', 'Cfl1', 'Srsf2', 'Snrpd1', 'Actb', 'Cdca7', 'Cox5a', 'Nhp2', 'G3bp1', 'Prdx1', 'Dkc1', 'Cdk4', 'Cct8', 'Banf1', 'Aprt', 'Ldha', 'Prmt1', 'Pp…
Metabolism	GO:0006139	nucleobase-containing compound metabolic process	64/5416	2.5e-13	['Ran', 'Mif', 'Ncl', 'Ppia', 'Nme1', 'Pfn1', 'Hsp90aa1', 'Set', 'Atp5g1', 'Hspd1', 'Ybx3', 'Hsp90ab1', 'Hspa8', 'C1qbp', 'Pa2g4', 'Nop10', 'Npm1', 'Ybx1', 'Hnrnpf', 'Dctpp1', 'Cct3', 'Fbl', 'Srsf2', 'Snrpd1', 'Cdca7', 'Nhp2', 'G3bp1', 'Dkc1', 'Cct8', 'Banf1', 'Aprt', 'Apex1', 'Cnbp', 'Mcm6', 'Mrpl12', 'Atp5b', 'Mcm3', 'Snrpd3', 'Sumo2', 'Nolc1', 'Snrpb', 'Dut', 'Rbm3', 'Hnrnpab', 'Pcbp1', 'Dnph1…
Metabolism	REAC:R-MMU-8953854	Metabolism of RNA	21/532	3e-07	['Ncl', 'Eif4a1', 'Set', 'Hspa8', 'Nop56', 'Ybx1', 'Hnrnpf', 'Fbl', 'Srsf2', 'Snrpd1', 'Nop58', 'Psma7', 'Snrpd3', 'Snrpb', 'Pcbp1', 'Psmb5', 'Hnrnpu', 'Snrpd2', 'Gnl3', 'U2af1', 'Srsf3']
Metabolism	REAC:R-MMU-72163	mRNA Splicing - Major Pathway	12/168	1.8e-06	['Hspa8', 'Ybx1', 'Hnrnpf', 'Srsf2', 'Snrpd1', 'Snrpd3', 'Snrpb', 'Pcbp1', 'Hnrnpu', 'Snrpd2', 'U2af1', 'Srsf3']
Metabolism	REAC:R-MMU-72172	mRNA Splicing	12/174	1.8e-06	['Hspa8', 'Ybx1', 'Hnrnpf', 'Srsf2', 'Snrpd1', 'Snrpd3', 'Snrpb', 'Pcbp1', 'Hnrnpu', 'Snrpd2', 'U2af1', 'Srsf3']
Metabolism	Rodriguez_et_al	High-output	67/1456	2.4e-41	Rbm3;Ranbp1;Snrpd2;Npm1;Hnrnpab;Anp32b;Hdgf;Nolc1;Eif5a;Slc25a5;Sec61b;Pa2g4;Dut;Mif;Cdca7;Hint1;Hnrnpf;Fbl;Gar1;Snrpd3;Srm;Nop56;Hsp90ab1;Mrpl12;Srsf3;Ppia;Sumo2;U2af1;Psmb5;Srsf2;H2afz;Park7;Eif4a1;Tuba1b;Calr;Hspe1;Hnrnpu;Serbp1;Nhp2;Snrpd1;Snrpb;Cdk4;Gapdh;Banf1;Ybx3;Atp5g1;Txn1;Ncl;Nme1;Mcm6;Pfn1;Ybx1;Ran;Ptma;Actb;Phgdh;Ppp1r14b;Nap1l1;Set;Dctpp1;Cox5a;C1qbp;Tuba4a;Tkt;Mcm3;Atp5e;Atp5b
Metabolism	Rodriguez_et_al	Multilineage	53/1038	3.7e-33	Rbm3;Ranbp1;Hspa8;Npm1;Hnrnpab;Anp32b;Hdgf;Nolc1;Eif5a;Slc25a5;Pa2g4;Dut;Hint1;Hnrnpf;Fbl;Nop56;Snrpd3;Srm;G3bp1;Ppia;Sumo2;U2af1;Psmb5;Srsf2;H2afz;Hsp90aa1;Tuba1b;Calr;Psma7;Hspe1;Hnrnpu;Serbp1;Snrpd1;Cdk4;Gapdh;Hspd1;Banf1;Ybx3;Atp5g1;Nme1;Mcm6;Ybx1;Ran;Ptma;Pcbp1;Phgdh;Ppp1r14b;Nap1l1;Set;Dctpp1;Cox5a;C1qbp;Mcm3
Metabolism	Cabezas-Wallscheid_et_al	dHSC_aHSC_single-cell	9/309	0.00085	Actb;Pcbp1;Set;Hsp90ab1;Hspa8;Srsf3;Ppia;H2afz;Ptma
Quiescent	GO:0019885	antigen processing and presentation of endogenous peptide antigen via MHC class I	3/10	0.0045	['H2-D1', 'B2m', 'H2-K1']
Quiescent	GO:0048534	hematopoietic or lymphoid organ development	16/953	0.0045	['Mllt3', 'Ltb', 'Clec2d', 'Lmo2', 'Pik3r1', 'B2m', 'Tmem176b', 'Cdkn1c', 'Psap', 'Zfp950', 'Cd81', 'Tmem176a', 'Rbp1', 'Mecom', 'Hhex', 'Lyl1']
Quiescent	GO:0030097	hemopoiesis	15/909	0.0045	['Mllt3', 'Clec2d', 'Lmo2', 'Pik3r1', 'B2m', 'Tmem176b', 'Cdkn1c', 'Psap', 'Zfp950', 'Cd81', 'Tmem176a', 'Rbp1', 'Mecom', 'Hhex', 'Lyl1']
Quiescent	REAC:R-MMU-163200	Respiratory electron transport, ATP synthesis by chemiosmotic coupling, and heat production by uncoupling proteins.	7/110	0.0015	['mt-Co1', 'Cox7a2l', 'mt-Atp6', 'mt-Co3', 'mt-Co2', 'Ndufa6', 'Uqcrh']
Quiescent	REAC:R-MMU-611105	Respiratory electron transport	6/86	0.0023	['mt-Co1', 'Cox7a2l', 'mt-Co3', 'mt-Co2', 'Ndufa6', 'Uqcrh']
Quiescent	REAC:R-MMU-1428517	The citric acid (TCA) cycle and respiratory electron transport	7/160	0.0059	['mt-Co1', 'Cox7a2l', 'mt-Atp6', 'mt-Co3', 'mt-Co2', 'Ndufa6', 'Uqcrh']
Quiescent	Rodriguez_et_al	Mk-bias	49/902	3.8e-31	Pik3r1;Gabarapl1;Laptm4a;B2m;Camk2d;Procr;Mettl7a1;H2-D1;Apoe;Hlf;Cox7a2l;Txnip;Gabarap;Psap;Ptpn18;Cdkn1c;Gcnt2;Prr13;Rbp1;Tmem176a;Hacd4;Ypel3;Mllt3;Ebi3;H2-K1;Rab38;Eif4a2;Gng11;Clec2d;Itm2b;Adgrg1;Trim47;Lst1;Gimap6;Lpar6;Gimap1;Glul;Cbx6;Mecom;Tbxas1;Lmo2;Pqlc3;mt-Co3;Krt18;Ltb;Tmem176b;Ifitm1;Pdzk1ip1;Limd2
Quiescent	Rodriguez_et_al	Low-output	58/1513	3.5e-30	Pik3r1;Gabarapl1;Laptm4a;B2m;Camk2d;Procr;Gstm1;Mettl7a1;H2-D1;Apoe;Hlf;Cox7a2l;Txnip;Gabarap;Psap;Ptpn18;Cdkn1c;Smpdl3a;Uqcrh;Gcnt2;Prr13;Rbp1;Tmem176a;Hacd4;Mllt3;Pik3ip1;Ebi3;H2-K1;Rab38;Eif4a2;Gng11;Cers4;Clec2d;Itm2b;Adgrg1;Cd81;Trim47;Lst1;Gimap6;AC149090.1;Lpar6;Gimap1;Glul;Cbx6;Mecom;Tbxas1;Lmo2;Pqlc3;mt-Co3;Rbm38;Krt18;Ltb;Tmem176b;Malat1;Ifitm1;Pfdn5;Pdzk1ip1;Limd2
Quiescent	Cabezas-Wallscheid_et_al	dHSC_vs_aHSC	33/788	5.7e-17	Pik3r1;B2m;Camk2d;Procr;Gstm1;Mettl7a1;Hlf;Cox7a2l;Txnip;Letm2;Psap;Smpdl3a;Prr13;Tmem176a;Mllt3;Ebi3;Cers4;Eef1a1;Lst1;Gimap6;Glul;Cbx6;Mecom;Tbxas1;Pqlc3;Ifitm1;Lsp1;Ltb;Tmem50a;Tmem176b;2310001H17Rik;Pdzk1ip1;Meg3
Quiescent	Cabezas-Wallscheid_et_al	dHSC_aHSC_single-cell	21/309	6.3e-15	B2m;Camk2d;Gstm1;H2-D1;Hlf;Txnip;Ptpn18;Uqcrh;Ogt;H2-K1;Itm2b;Adgrg1;Eef1a1;Rsrp1;Lmo2;Tpt1;Tmem176b;Fau;Ifitm1;Malat1;Pdzk1ip1
Quiescent	Rodriguez_et_al	Serial-engraftment	25/542	6.5e-14	Pik3r1;Gabarapl1;Procr;Gstm1;Ssbp2;Hlf;Cdkn1c;Gcnt2;Hacd4;Mllt3;Ogt;Eif4a2;Gng11;Itm2b;Adgrg1;Trim47;Lst1;Lpar6;Gimap1;Glul;Mecom;Lmo2;Ltb;Tmem176b;Ifitm1
Quiescent	Cabezas-Wallscheid_et_al	HSC_vs_MPP4	9/274	0.00017	Pqlc3;Procr;Gstm1;Mllt3;Hlf;Ifitm1;Mecom;Pdzk1ip1;Meg3
Activated	GO:0010467	gene expression	63/5933	2.8e-13	['Nr4a1', 'Hes1', 'H3f3b', 'Ier2', 'Junb', 'Klf2', 'Fos', 'Smad7', 'Nr4a2', 'Rgs2', 'Zfp36', 'Skil', 'Ppp1r15a', 'Ccnt1', 'Isca1', 'Btg2', 'Ddx5', 'Egr1', 'Ccnl1', 'Klf4', 'Cdk11b', 'Klf6', 'Srsf5', 'Tsc22d2', 'Cebpb', 'Rlim', 'Clk1', 'Tsc22d1', 'Jund', 'Eif1', 'Dnajb1', 'Sik1', 'Wwc2', 'Jun', 'Sfr1', 'Id1', 'Snrpc', 'Elf1', 'Dnajb9', 'Maff', 'Cdkn1a', 'Tiparp', 'Rbm39', 'Dusp5', 'Ctla2a', 'Klf13…
Activated	GO:0019219	regulation of nucleobase-containing compound metabolic process	52/3931	2.8e-13	['Nr4a1', 'Hes1', 'H3f3b', 'Ier2', 'Junb', 'Klf2', 'Fos', 'Smad7', 'Nr4a2', 'Zfp36', 'Skil', 'Ppp1r15a', 'Ccnt1', 'Dusp1', 'Btg2', 'Ddx5', 'Egr1', 'Ccnl1', 'Klf4', 'Cdk11b', 'Klf6', 'Srsf5', 'Tsc22d2', 'Cebpb', 'Rlim', 'Clk1', 'Tsc22d1', 'Jund', 'Dnajb1', 'Sik1', 'Wwc2', 'Jun', 'Sfr1', 'Id1', 'Elf1', 'Maff', 'Cdkn1a', 'Rbm39', 'Dusp5', 'Klf13', 'Ing2', 'Tra2b', 'Ier5', 'Nkx2-3', 'Per1', 'Fosb', '…
Activated	GO:0006366	transcription by RNA polymerase II	42/2492	2.8e-13	['Nr4a1', 'Hes1', 'Ier2', 'Junb', 'Klf2', 'Fos', 'Smad7', 'Nr4a2', 'Zfp36', 'Skil', 'Ppp1r15a', 'Ccnt1', 'Btg2', 'Ddx5', 'Egr1', 'Ccnl1', 'Klf4', 'Klf6', 'Tsc22d2', 'Cebpb', 'Rlim', 'Tsc22d1', 'Jund', 'Dnajb1', 'Sik1', 'Wwc2', 'Jun', 'Id1', 'Elf1', 'Maff', 'Rbm39', 'Klf13', 'Ier5', 'Nkx2-3', 'Per1', 'Fosb', 'Rnf4', 'Purb', 'Zc3h12a', 'Jmjd1c', 'Etv3', 'Pcgf5']
Activated	REAC:R-MMU-8953897	Cellular responses to external stimuli	10/414	0.007	['Fos', 'Ubc', 'Cebpb', 'Dnajb1', 'Jun', 'Id1', 'Cdkn1a', 'Ranbp2', 'Ncf2', 'Hspa5']
Activated	REAC:R-MMU-2262752	Cellular responses to stress	10/412	0.007	['Fos', 'Ubc', 'Cebpb', 'Dnajb1', 'Jun', 'Id1', 'Cdkn1a', 'Ranbp2', 'Ncf2', 'Hspa5']
Activated	REAC:R-MMU-2173793	Transcriptional activity of SMAD2/SMAD3:SMAD4 heterotrimer	4/33	0.007	['Smad7', 'Skil', 'Ubc', 'Ccnt1']
Activated	Rodriguez_et_al	Low-output	29/1513	3.5e-06	Ctla2a;Dnajb9;Klf2;Nr4a1;Fosb;Rgs1;Jund;Klf6;Tsc22d1;Tgoln1;Rhob;Hspa5;Cebpb;Nr4a2;Eif1;Hes1;Myct1;Neurl3;Maff;Mcl1;Srsf5;Fos;Dusp1;Klf4;Neat1;Klf9;Ppp1r15a;Nkx2-3;Rnf4
Activated	Rodriguez_et_al	Mk-bias	21/902	4.9e-06	Klf2;Rgs1;Jund;Junb;Klf6;Tsc22d1;Cebpb;Ier2;Jun;H3f3b;Nr4a2;Myct1;Neurl3;Maff;Fos;Zfp36;Dusp1;Neat1;Klf9;Ppp1r15a;Nkx2-3
Activated	Rodriguez_et_al	Serial-engraftment	11/542	0.0044	Hspa5;Cebpb;Cdkn1a;Neat1;Pnrc1;Klf9;Junb;Nr4a2;Tsc22d1;Tgoln1;Dusp2
Interferon	GO:0051707	response to other organism	62/1562	5.3e-45	['Iigp1', 'Isg15', 'Ifit1', 'Gbp7', 'Oasl2', 'Ifitm3', 'Rtp4', 'Ifi203', 'Rsad2', 'Irgm1', 'Irf7', 'Ifi44', 'Herc6', 'Ifit3', 'Parp14', 'Mndal', 'Gbp5', 'Ifit2', 'Usp18', 'Cmpk2', 'Isg20', 'Cxcl10', 'Serpina3f', 'Irf1', 'Gbp2', 'Trim30a', 'Slfn8', 'Eif2ak2', 'Gbp3', 'Stat1', 'Oasl1', 'Apobec3', 'Ddx58', 'Parp9', 'Casp4', 'Trim12a', 'Samhd1', 'Tap1', 'Slfn2', 'Cd274', 'Ifih1', 'Socs1', 'Bst2', 'Zb…
Interferon	GO:0043207	response to external biotic stimulus	62/1565	5.3e-45	['Iigp1', 'Isg15', 'Ifit1', 'Gbp7', 'Oasl2', 'Ifitm3', 'Rtp4', 'Ifi203', 'Rsad2', 'Irgm1', 'Irf7', 'Ifi44', 'Herc6', 'Ifit3', 'Parp14', 'Mndal', 'Gbp5', 'Ifit2', 'Usp18', 'Cmpk2', 'Isg20', 'Cxcl10', 'Serpina3f', 'Irf1', 'Gbp2', 'Trim30a', 'Slfn8', 'Eif2ak2', 'Gbp3', 'Stat1', 'Oasl1', 'Apobec3', 'Ddx58', 'Parp9', 'Casp4', 'Trim12a', 'Samhd1', 'Tap1', 'Slfn2', 'Cd274', 'Ifih1', 'Socs1', 'Bst2', 'Zb…
Interferon	GO:0009607	response to biotic stimulus	62/1601	1.1e-44	['Iigp1', 'Isg15', 'Ifit1', 'Gbp7', 'Oasl2', 'Ifitm3', 'Rtp4', 'Ifi203', 'Rsad2', 'Irgm1', 'Irf7', 'Ifi44', 'Herc6', 'Ifit3', 'Parp14', 'Mndal', 'Gbp5', 'Ifit2', 'Usp18', 'Cmpk2', 'Isg20', 'Cxcl10', 'Serpina3f', 'Irf1', 'Gbp2', 'Trim30a', 'Slfn8', 'Eif2ak2', 'Gbp3', 'Stat1', 'Oasl1', 'Apobec3', 'Ddx58', 'Parp9', 'Casp4', 'Trim12a', 'Samhd1', 'Tap1', 'Slfn2', 'Cd274', 'Ifih1', 'Socs1', 'Bst2', 'Zb…
Interferon	REAC:R-MMU-1169410	Antiviral mechanism by IFN-stimulated genes	6/28	1.5e-07	['Isg15', 'Usp18', 'Eif2ak2', 'Oasl1', 'Ddx58', 'Ube2l6']
Interferon	REAC:R-MMU-913531	Interferon Signaling	7/59	2e-07	['Isg15', 'Usp18', 'Eif2ak2', 'Oasl1', 'Ddx58', 'Socs1', 'Ube2l6']
Interferon	REAC:R-MMU-1169408	ISG15 antiviral mechanism	5/24	1.6e-06	['Isg15', 'Usp18', 'Eif2ak2', 'Ddx58', 'Ube2l6']
Interferon	Rodriguez_et_al	Low-output	43/1513	6.8e-16	Gbp3;Serpina3f;Cited2;Oasl2;Socs2;Pim1;Xbp1;Gbp2;Iigp1;Il2rg;Ly6e;Gbp7;Znfx1;Gm4951;Gbp5;Slfn2;Samsn1;Ehd4;Gbp4;Igtp;Cish;Rtp4;Ncoa7;Rsad2;Irgm2;Ifit3;Zbp1;Ube2l6;Ly6a;Shisa5;Trim12a;Ifit1;Ifitm3;Parp14;Isg20;Dtx3l;Serpina3g;Stat1;Il27;Ifit2;Tnfsf10;Tgtp2;Pnp
Interferon	Rodriguez_et_al	Mk-bias	34/902	6.8e-16	Cited2;Oasl2;Socs2;Ifi44;Ifi203;Pim1;Gbp2;Iigp1;Nfkbia;Il2rg;Ly6e;Gbp7;Gbp5;Slfn2;Samsn1;Ehd4;Igtp;Cish;Rtp4;Ncoa7;Irgm2;Pml;Zbp1;Ube2l6;Ly6a;Shisa5;Ddx58;Ifit1;Ifitm3;Treml2;Serpina3g;Dtx3l;Stat1;Tnfsf10
Interferon	Cabezas-Wallscheid_et_al	dHSC_vs_aHSC	28/788	1.8e-12	Sp100;Stat2;Irf1;Oasl2;Socs2;Ifi44;Samhd1;Xbp1;Iigp1;Arid5a;Il2rg;Znfx1;Gm4951;F830016B08Rik;Slfn2;9930111J21Rik2;Irf7;Gbp4;Cish;Pml;Tgtp2;Shisa5;Ly6a;Parp14;Trim30a;Slfn8;Slfn5;Pnp
Interferon	Rodriguez_et_al	Serial-engraftment	13/542	0.00025	Ddx58;Ifitm3;Ly6e;Treml2;Rtp4;Oasl2;Socs2;Tnfsf10;Samsn1;Pim1;Samhd1;Slfn8;Pnp
Acute-Activation	GO:0048519	negative regulation of biological process	47/5544	0.001	['Tsc22d3', 'Plaur', 'Ifngr1', 'Anks1', 'Pde10a', 'Rnf125', 'Cirbp', 'Mef2c', 'Lmcd1', 'Sla2', 'Ucp2', 'Ddit4', 'Myh9', 'Foxo1', 'Pde4d', 'Por', 'Fkbp1a', 'Cers2', 'Tmsb4x', 'Map2k3', 'Crem', 'Gpr132', 'Chd7', 'Pdcd6', 'P2rx4', 'Egfl7', 'Ago2', 'Tnfaip8', 'Pde3b', 'Acer2', 'Prkar1a', 'Ctla2b', 'Phc2', 'Il4ra', 'Rabgef1', 'Fgfr1', 'Gnai3', 'Rasa2', 'Cbarp', 'Tpst2', 'Klf10', 'Swap70', 'Lemd2', 'Mo…
Acute-Activation	GO:1902532	negative regulation of intracellular signal transduction	13/518	0.001	['Plaur', 'Pde10a', 'Rnf125', 'Sla2', 'Ddit4', 'Foxo1', 'Pde4d', 'Map2k3', 'Pdcd6', 'Rabgef1', 'Rasa2', 'Lemd2', 'Prnp']
Acute-Activation	GO:0048523	negative regulation of cellular process	44/5068	0.0011	['Tsc22d3', 'Plaur', 'Anks1', 'Pde10a', 'Rnf125', 'Cirbp', 'Mef2c', 'Lmcd1', 'Sla2', 'Ucp2', 'Ddit4', 'Myh9', 'Foxo1', 'Pde4d', 'Por', 'Fkbp1a', 'Cers2', 'Tmsb4x', 'Map2k3', 'Crem', 'Gpr132', 'Chd7', 'Pdcd6', 'Egfl7', 'Ago2', 'Tnfaip8', 'Pde3b', 'Acer2', 'Prkar1a', 'Ctla2b', 'Phc2', 'Il4ra', 'Rabgef1', 'Fgfr1', 'Gnai3', 'Rasa2', 'Cbarp', 'Klf10', 'Swap70', 'Lemd2', 'Morf4l1', 'Prnp', 'Prkch', 'Pp…
Acute-Activation	Rodriguez_et_al	Low-output	27/1513	3.9e-05	Lmcd1;Prnp;Tinagl1;Gpr132;mt-Nd3;Tsc22d3;Mef2c;mt-Nd2;Tnfaip8;Pde3b;Galc;Upp1;Ddit4;N4bp2;Sult1a1;Osbpl9;Cdk17;Eef2;Ctla2b;Fkbp1a;Ppp1r18;Sla2;Por;Tpst2;St7;Epb41;Cbarp
Acute-Activation	Cabezas-Wallscheid_et_al	dHSC_vs_aHSC	16/788	0.00055	Tpm4;Emb;Ablim1;Tnfaip8;Cirbp;Prnp;Tinagl1;Por;Tsc22d3;Sult1a1;Hivep3;Tns1;St7;Ifngr1;Cytip;Eef2
Cell-cycle	GO:0007049	cell cycle	61/1657	2.8e-42	['Stmn1', 'Hmgb1', 'Mki67', 'Spc24', 'Top2a', 'Cks2', 'Birc5', 'Lmnb1', 'Smc2', 'Cdca8', 'Smc4', 'Ube2s', 'Rrm1', 'Cdk1', 'Gmnn', 'Ezh2', 'Tpx2', 'Cenpk', 'Pclaf', 'Cdca3', 'Cenpf', 'Rad51', 'Ccnb2', 'Ccna2', 'Clspn', 'Cenph', 'Prc1', 'Nusap1', 'Uhrf1', 'Knstrn', 'Mad2l1', 'Aurkb', 'Cenpw', 'Rad51ap1', 'Cdc20', 'Ncapd2', 'Kif20b', 'Knl1', 'Racgap1', 'Mns1', 'Fignl1', 'Cenpe', 'Kif11', 'Nuf2', 'Ki…
Cell-cycle	GO:0022402	cell cycle process	52/1082	3.1e-40	['Stmn1', 'Mki67', 'Top2a', 'Cks2', 'Birc5', 'Lmnb1', 'Smc2', 'Cdca8', 'Smc4', 'Ube2s', 'Cdk1', 'Gmnn', 'Ezh2', 'Tpx2', 'Cenpk', 'Pclaf', 'Cenpf', 'Rad51', 'Ccnb2', 'Ccna2', 'Clspn', 'Cenph', 'Prc1', 'Nusap1', 'Knstrn', 'Mad2l1', 'Aurkb', 'Rad51ap1', 'Cdc20', 'Ncapd2', 'Kif20b', 'Knl1', 'Racgap1', 'Fignl1', 'Cenpe', 'Kif11', 'Nuf2', 'Kif22', 'Tacc3', 'Fen1', 'Incenp', 'Cit', 'Esco2', 'Bub1b', 'Ha…
Cell-cycle	GO:0000278	mitotic cell cycle	46/819	9.7e-38	['Stmn1', 'Hmgb1', 'Mki67', 'Cks2', 'Birc5', 'Lmnb1', 'Smc2', 'Cdca8', 'Smc4', 'Ube2s', 'Rrm1', 'Cdk1', 'Ezh2', 'Tpx2', 'Cenpk', 'Cenpf', 'Rad51', 'Ccnb2', 'Ccna2', 'Clspn', 'Cenph', 'Prc1', 'Nusap1', 'Knstrn', 'Mad2l1', 'Aurkb', 'Cenpw', 'Cdc20', 'Ncapd2', 'Kif20b', 'Racgap1', 'Cenpe', 'Kif11', 'Nuf2', 'Kif22', 'Tacc3', 'Incenp', 'Cit', 'Bub1b', 'Ncapg', 'Sgo1', 'Spc25', 'Fbxo5', 'Ckap2', 'Ndc80…
Cell-cycle	REAC:R-MMU-1640170	Cell Cycle	38/577	6.2e-28	['Spc24', 'Birc5', 'Lmnb1', 'Smc2', 'Cdca8', 'Smc4', 'Ube2s', 'Cdk1', 'Cenpm', 'Gmnn', 'Tpx2', 'Cenpk', 'Cenpf', 'Ccnb2', 'Ccna2', 'Clspn', 'Cenph', 'Mad2l1', 'Aurkb', 'Cenpw', 'Rfc4', 'Cdc20', 'Knl1', 'Nuf2', 'Incenp', 'Esco2', 'Bub1b', 'Pmf1', 'Haus4', 'Ncapg', 'Sgo1', 'Spc25', 'Fbxo5', 'Cenpp', 'Ndc80', 'Mis18bp1', 'Cdca5', 'Hmmr']
Cell-cycle	REAC:R-MMU-68877	Mitotic Prometaphase	26/179	1.3e-26	['Spc24', 'Birc5', 'Smc2', 'Cdca8', 'Smc4', 'Cdk1', 'Cenpm', 'Cenpk', 'Cenpf', 'Ccnb2', 'Cenph', 'Mad2l1', 'Aurkb', 'Cdc20', 'Knl1', 'Nuf2', 'Incenp', 'Bub1b', 'Pmf1', 'Haus4', 'Ncapg', 'Sgo1', 'Spc25', 'Cenpp', 'Ndc80', 'Cdca5']
Cell-cycle	REAC:R-MMU-69278	Cell Cycle, Mitotic	35/500	1.8e-26	['Spc24', 'Birc5', 'Lmnb1', 'Smc2', 'Cdca8', 'Smc4', 'Ube2s', 'Cdk1', 'Cenpm', 'Gmnn', 'Tpx2', 'Cenpk', 'Cenpf', 'Ccnb2', 'Ccna2', 'Cenph', 'Mad2l1', 'Aurkb', 'Rfc4', 'Cdc20', 'Knl1', 'Nuf2', 'Incenp', 'Esco2', 'Bub1b', 'Pmf1', 'Haus4', 'Ncapg', 'Sgo1', 'Spc25', 'Fbxo5', 'Cenpp', 'Ndc80', 'Cdca5', 'Hmmr']
Cell-cycle	Rodriguez_et_al	High-output	61/1456	1.8e-34	Bub1b;Oaz1;Kif22;Hmgb3;Knstrn;Rad51ap1;Ezh2;Rad51;Rrm1;Cks2;Stmn1;Cenpm;Top2a;Uhrf1;Gmnn;Dnajc9;Pbk;Hjurp;Ccnb2;Cdca8;Lmnb1;Fen1;Tpx2;Cenph;Nucks1;Cdca3;Nrm;Asf1b;Cenpp;Dek;H2afv;Kif15;Tk1;Tacc3;Hist1h1b;Smc2;Birc5;Mis18bp1;Incenp;Csrp1;Mns1;Ncapg;Slbp;Fbxo5;Ube2s;Cdk1;Rrm2;Smc4;Spc24;Cenpw;Hmgb1;Ckap2l;Cdca5;Anp32e;Mad2l1;Kif11;Hmgb2;Pmf1;Aurkb;Ncapd2;Fignl1
Cell-cycle	Rodriguez_et_al	Multilineage	54/1038	1.8e-34	Bub1b;Oaz1;Kif22;Hmgb3;Knstrn;Ezh2;Rad51;Prc1;Rrm1;Cks2;Nt5dc2;Stmn1;Cenpm;Top2a;Uhrf1;Gmnn;Dnajc9;Hjurp;Ccnb2;Cdca8;Lmnb1;Fen1;Tpx2;Cenph;Tyms;Nucks1;Nrm;Asf1b;Dek;Kif15;Tk1;Tacc3;Smc2;Birc5;Mis18bp1;Incenp;Mns1;Tmpo;Slbp;Fbxo5;Ube2s;Cdk1;Rrm2;Smc4;Cenpw;Ckap2l;Anp32e;Hmgb2;Mad2l1;Kif11;Pmf1;Ccna2;Ncapd2;Fignl1

## Sheet: cluster_LSK
Cluster	Origin	Pathway	Gene Overlap	Adjusted P-value	Gene names
Primed	GO:0045321	leukocyte activation	19/996	4e-05	['Sox4', 'Cd37', 'Il12a', 'Tespa1', 'Lyl1', 'Ptpre', 'Pou2f2', 'Cd27', 'Lat2', 'Satb1', 'Coro1a', 'Hhex', 'Tspan32', 'Laptm5', 'Myb', 'Spi1', 'Tnfaip8l2', 'Lax1', 'Rac2']
Primed	GO:0001775	cell activation	20/1115	4e-05	['Sox4', 'Cd37', 'Il12a', 'Tespa1', 'Lyl1', 'Ptpre', 'Pou2f2', 'Cd27', 'Hoxa9', 'Lat2', 'Satb1', 'Coro1a', 'Hhex', 'Tspan32', 'Laptm5', 'Myb', 'Spi1', 'Tnfaip8l2', 'Lax1', 'Rac2']
Primed	GO:0002376	immune system process	32/2807	4.6e-05	['Sox4', 'Cd37', 'Cd34', 'Wfdc17', 'Il12a', 'Serpinb1a', 'Plac8', 'Tespa1', 'Lyl1', 'Ptpre', 'Flt3', 'Myc', 'Pou2f2', 'Cd27', 'Hoxa9', 'Lat2', 'Satb1', 'Il16', 'Coro1a', 'Hhex', 'Tspan32', 'Laptm5', 'Myb', 'Spi1', '1810058I24Rik', 'Ncf1', 'Kcnn4', 'H2-DMa', 'Tnfaip8l2', 'Lax1', 'Rac2', 'Rnase6']
Primed	REAC:R-MMU-8866911	TFAP2 (AP-2) family regulates transcription of cell cycle factors	2/3	0.014	['Myc', 'Kdm5b']
Primed	Rodriguez_et_al	High-output	39/1456	3.7e-13	Btf3;Cd37;Coro1a;Sh3bgrl3;Satb1;Taldo1;Sec61b;Gm2a;Ptp4a3;Tnfaip8l2;Myb;Gmfg;Plac8;Hhex;Rbfa;Wfdc17;Serpinb1a;Ighm;Arhgap30;Spi1;Tespa1;Xpc;Il12a;Man2b1;Lat2;Ptpre;Cd52;Flt3;Eef1b2;Fam117a;Cd53;Sh2d5;Acads;Actb;Tsc22d4;Sox4;Myc;Cd34;Ramp1
Primed	Rodriguez_et_al	Multilineage	20/1038	0.0001	Btf3;Cd37;Sh3bgrl3;Satb1;Taldo1;Myb;Plac8;Serpinb1a;Ighm;Tespa1;Il12a;Eef1b2;Flt3;Sh2d5;Fam117a;Cd53;Lax1;Ncf1;Myc;Cd34
Primed	Cabezas-Wallscheid_et_al	dHSC_vs_aHSC	17/788	0.0001	Actb;Tcp11l2;Aldoa;Il16;Cyth4;Kdm5b;Fxyd5;Rac2;Lsp1;Plac8;Ncf1;Satb1;Mn1;Cd52;Gm2a;Arhgdib;Cd53
Primed	Cabezas-Wallscheid_et_al	dHSC_aHSC_single-cell	8/309	0.0033	Actb;Cd37;Ogt;Ptpn18;Serpinb1a;Gm2a;Rsrp1;Ptp4a3
Metabolism	GO:0006260	DNA replication	31/246	9.1e-33	['Lig1', 'Gmnn', 'Mcm6', 'Mcm7', 'Tipin', 'Mcm3', 'Mcm5', 'Rpa2', 'Nasp', 'Pclaf', 'Pcna', 'Fen1', 'Rrm2', 'Rrm1', 'Mcm2', 'Rfc4', 'Rad51', 'Prim1', 'Rfc2', 'Dtl', 'Gins2', 'Rfc5', 'Cdt1', 'Npm1', 'Orc6', 'Ssrp1', 'Mcm4', 'Rbbp7', 'Rpa1', 'Pola1', 'Pold2']
Metabolism	GO:0006259	DNA metabolic process	41/843	2.7e-28	['Lig1', 'Dctpp1', 'Uhrf1', 'Mcm6', 'Mcm7', 'Tipin', 'Hsp90aa1', 'Mcm3', 'Mcm5', 'Rpa2', 'Tk1', 'Pclaf', 'Pcna', 'Fen1', 'Dnmt1', 'Mcm2', 'Rfc4', 'Dek', 'Rad51', 'Prim1', 'Hspd1', 'Clspn', 'Rfc2', 'Nme1', 'Dtl', 'Tfdp1', 'Gins2', 'Hells', 'Rfc5', 'Cdt1', 'Hmgn1', 'Npm1', 'Ssrp1', 'Mcm4', 'Rad51ap1', 'Ung', 'Rpa1', 'Pola1', 'Ezh2', 'Pold2', 'Usp1']
Metabolism	GO:0046483	heterocycle metabolic process	76/5535	7.5e-23	['Dut', 'Lig1', 'Tyms', 'Ppia', 'Ran', 'Dctpp1', 'Ybx1', 'Gmnn', 'Uhrf1', 'Mcm6', 'Mcm7', 'Tipin', 'Hsp90aa1', 'Mcm3', 'Mcm5', 'Rpa2', 'Siva1', 'Dhfr', 'Tk1', 'Slbp', 'Pclaf', 'Pcna', 'Fen1', 'Rrm2', 'Tpi1', 'Rrm1', 'Gapdh', 'Mif', 'Atad2', 'Hint1', 'Alyref', 'Dnmt1', 'Mcm2', 'Rfc4', 'Dek', 'Rad51', 'Prim1', 'Hspd1', 'Clspn', 'Dtymk', 'Cdca7', 'Rfc2', 'Pa2g4', 'Nme1', 'Dtl', 'Set', 'Hat1', 'Tfdp1…
Metabolism	REAC:R-MMU-69306	DNA Replication	18/119	1.1e-15	['Gmnn', 'Mcm6', 'Mcm7', 'Mcm3', 'Mcm5', 'Pcna', 'Mcm2', 'Rfc4', 'Prim1', 'Rfc2', 'Gins2', 'Rfc5', 'Cdt1', 'E2f1', 'Mcm4', 'Rpa1', 'Pola1', 'Pold2']
Metabolism	REAC:R-MMU-1640170	Cell Cycle	30/577	1.3e-14	['Ran', 'Gmnn', 'Mcm6', 'Mcm7', 'Hsp90aa1', 'Mcm3', 'Mcm5', 'Tuba1b', 'Pcna', 'Mcm2', 'Rfc4', 'Prim1', 'Clspn', 'Nudc', 'Rfc2', 'Cenpm', 'Cdk4', 'Set', 'Tfdp1', 'Gins2', 'Rfc5', 'Cdt1', 'Npm1', 'E2f1', 'Tuba4a', 'Mcm4', 'Rbbp7', 'Rpa1', 'Pola1', 'Pold2']
Metabolism	REAC:R-MMU-68962	Activation of the pre-replicative complex	11/29	2.9e-14	['Gmnn', 'Mcm6', 'Mcm7', 'Mcm3', 'Mcm5', 'Mcm2', 'Prim1', 'Cdt1', 'Mcm4', 'Rpa1', 'Pola1']
Metabolism	Rodriguez_et_al	Multilineage	74/1038	1.1e-61	Ranbp1;Syce2;Dtl;Npm1;Mcm5;Ezh2;Hnrnpab;E2f1;Rad51;Ssrp1;Cycs;Anp32b;Dtymk;Paics;Rrm1;Nt5dc2;Stmn1;Cenpm;Pa2g4;Dut;Gmnn;Mcm4;Tipin;Dnajc9;Hnrnpf;Slc25a5;Dnmt1;Nasp;Hint1;Mrpl18;Fabp5;Ppia;Mcm7;Sumo2;Lig1;Hsp90aa1;Fen1;Tuba1b;Tyms;Ung;Snrpd1;Dek;Cdk4;Gapdh;Alyref;Hspd1;Rpa1;Tk1;Ybx3;Siva1;Nme1;Rpa2;Mcm6;Dhfr;Usp1;Ybx1;Ran;Ptma;Slbp;Nap1l1;Cdt1;Rrm2;Set;Pcna;Cox5a;Mcm2;Dctpp1;Sdf2l1;Mcm3;Uhrf1;Hell…
Metabolism	Rodriguez_et_al	High-output	73/1456	1e-49	Ranbp1;Syce2;Dtl;Npm1;Mcm5;Rad51ap1;Ezh2;Hnrnpab;E2f1;Rad51;Ssrp1;Cycs;Anp32b;Dtymk;Paics;Rrm1;Mcm4;Stmn1;Cenpm;Pa2g4;Dut;Mif;Gmnn;Tipin;Dnajc9;Hnrnpf;Slc25a5;Dnmt1;Nasp;Hint1;Mrpl18;Fabp5;Ppia;Mcm7;Sumo2;Lig1;Fen1;Tuba1b;Ung;Snrpd1;Dek;Cdk4;Gapdh;Alyref;Rpa1;Tk1;Ybx3;Ncl;Nme1;Siva1;Rpa2;Mcm6;Dhfr;Usp1;Ybx1;Ran;Ptma;Cdca7;Slbp;Nap1l1;Rrm2;Set;Cdt1;Cox5a;Mcm2;Tuba4a;Pcna;Dctpp1;Mcm3;Sdf2l1;Uhrf1;R…
Primitive	GO:0030097	hemopoiesis	24/909	1.1e-09	['Fos', 'Meis1', 'Mllt3', 'Mpl', 'Rbp1', 'Car2', 'Lmo2', 'Mecom', 'Angpt1', 'Cbfa2t3', 'Egr1', 'Zfp36', 'Tmem176b', 'Smad7', 'Pbx1', 'Nkx2-3', 'Klf2', 'B2m', 'Gata2', 'Zfp36l2', 'Ctsl', 'Dnajb9', 'Hes1', 'Zfpm1']
Primitive	GO:0048534	hematopoietic or lymphoid organ development	24/953	1.6e-09	['Fos', 'Meis1', 'Mllt3', 'Mpl', 'Rbp1', 'Car2', 'Lmo2', 'Mecom', 'Angpt1', 'Cbfa2t3', 'Egr1', 'Zfp36', 'Tmem176b', 'Smad7', 'Pbx1', 'Nkx2-3', 'Klf2', 'B2m', 'Gata2', 'Zfp36l2', 'Ctsl', 'Dnajb9', 'Hes1', 'Zfpm1']
Primitive	GO:0002520	immune system development	24/1015	4e-09	['Fos', 'Meis1', 'Mllt3', 'Mpl', 'Rbp1', 'Car2', 'Lmo2', 'Mecom', 'Angpt1', 'Cbfa2t3', 'Egr1', 'Zfp36', 'Tmem176b', 'Smad7', 'Pbx1', 'Nkx2-3', 'Klf2', 'B2m', 'Gata2', 'Zfp36l2', 'Ctsl', 'Dnajb9', 'Hes1', 'Zfpm1']
Primitive	Rodriguez_et_al	Low-output	71/1513	2.1e-45	Klf2;Dnajb9;Pura;Gabarapl1;Laptm4a;B2m;Nr4a1;Procr;Cd63;Gstm1;Capg;Apoe;H2-D1;Fosb;Hlf;Mpl;Jund;Cox7a2l;Aplp2;Smpdl3a;Rhob;Prr13;Rbp1;Pdzk1ip1;Hacd4;Car2;Mllt3;Ctsl;Cbfa2t3;Rab38;Map1lc3b;Gng11;Nr4a2;Eif4a2;Zbtb20;Itm2b;Nfat5;Adgrg1;Esam;Eif1;Angpt1;Ormdl3;Trim47;Lst1;Hes1;Gimap6;Gimap1;Ldhb;Glul;Tgm2;Pbx1;Mecom;Zfp36l2;Anxa5;Meis1;Myl6;Fos;Gm19590;Tbxas1;Lmo2;Dusp1;Neat1;Ftl1;Krt18;Tmem176b;Mala…
Primitive	Rodriguez_et_al	Mk-bias	59/902	5e-44	Klf2;Gabarapl1;Laptm4a;B2m;Cd63;Procr;Capg;Apoe;H2-D1;Hlf;Mpl;Jund;Cox7a2l;Aplp2;Prr13;Rbp1;Ier2;Pdzk1ip1;Hacd4;Mllt3;Ctsl;Cbfa2t3;Rab38;Map1lc3b;Gng11;Nr4a2;Eif4a2;Zbtb20;Itm2b;Adgrg1;Esam;Angpt1;Ormdl3;Trim47;Lst1;Gimap6;Gimap1;Ldhb;Glul;Tgm2;Pbx1;Mecom;Zfp36l2;Anxa5;Meis1;Vamp5;Fos;Tbxas1;Cd9;Zfp36;Lmo2;Dusp1;Neat1;Krt18;Tmem176b;Ifitm1;Ppp1r15a;Gata2;Nkx2-3
Primitive	Rodriguez_et_al	Serial-engraftment	28/542	1.3e-16	Gabarapl1;Cd63;Procr;Gstm1;Hlf;Mpl;Hacd4;Mllt3;Cbfa2t3;Eif4a2;Gng11;Nr4a2;Itm2b;Adgrg1;Esam;Angpt1;Trim47;Lst1;Pnrc1;Gimap1;Glul;Tgm2;Mecom;Zfp36l2;Lmo2;Neat1;Tmem176b;Ifitm1
Primitive	Cabezas-Wallscheid_et_al	dHSC_aHSC_single-cell	22/309	4.7e-16	B2m;Gstm1;H2-D1;Hlf;Car2;Map1lc3b;Zbtb20;Itm2b;Adgrg1;Eif1;Angpt1;Clk1;Rbm39;Lmo2;Ftl1;Tmem176b;Tpt1;Malat1;Ifitm1;Fau;Ddx5;Pdzk1ip1
Primitive	Cabezas-Wallscheid_et_al	dHSC_vs_aHSC	26/788	4e-11	Klf2;B2m;Procr;Gstm1;Hlf;Cox7a2l;Smpdl3a;Prr13;Isca1;Mllt3;Ctsl;Map1lc3b;Zbtb20;Lst1;Gimap6;Ldhb;Glul;Tgm2;Anxa5;Mecom;Tbxas1;Zfp36;Ftl1;Tmem176b;Ifitm1;Pdzk1ip1
Primitive	Cabezas-Wallscheid_et_al	HSC_vs_MPP4	7/274	0.004	Procr;Gstm1;Mllt3;Hlf;Ifitm1;Mecom;Pdzk1ip1
Cell-cycle	GO:0051301	cell division	59/578	1.3e-67	['Ube2c', 'Cdca8', 'Nusap1', 'Ccnb2', 'Cks2', 'Birc5', 'Top2a', 'Cdca3', 'Cenpa', 'Tpx2', 'Cdc20', 'Ccna2', 'Smc4', 'Ube2s', 'Prc1', 'Knl1', 'Kif11', 'Racgap1', 'Bub1b', 'Cks1b', 'Cdk1', 'Mis18bp1', 'Knstrn', 'Smc2', 'Incenp', 'Aurkb', 'Pimreg', 'Ccnb1', 'Kif20b', 'Kif23', 'Spc24', 'Bub3', 'Ncapd2', 'Aspm', 'Nuf2', 'Spc25', 'Plk1', 'Cit', 'Mad2l1', 'Aurka', 'Rad21', 'Ckap2', 'Kif20a', 'Kif4', 'Cd…
Cell-cycle	GO:0000278	mitotic cell cycle	63/819	8.7e-66	['Ube2c', 'Cdca8', 'Nusap1', 'Ccnb2', 'Cenpf', 'Cks2', 'Birc5', 'Mki67', 'Tubb4b', 'Cenpa', 'Tpx2', 'Cdc20', 'Ccna2', 'Smc4', 'Ube2s', 'Prc1', 'Kif11', 'Racgap1', 'Tubb5', 'Bub1b', 'Cks1b', 'Cdk1', 'Kif22', 'Knstrn', 'Smc2', 'Hmgb1', 'Cenpe', 'Incenp', 'Aurkb', 'Ccnb1', 'Kif20b', 'Kif23', 'Bub3', 'Ncapd2', 'Lmnb1', 'Tacc3', 'Nuf2', 'Spc25', 'Plk1', 'Tuba1c', 'Cit', 'Mad2l1', 'Aurka', 'Rad21', 'Ck…
Cell-cycle	GO:0007049	cell cycle	74/1657	1.9e-64	['Ube2c', 'Cdca8', 'Nusap1', 'Ccnb2', 'Cenpf', 'Cks2', 'Birc5', 'Mki67', 'Tubb4b', 'Top2a', 'Cdca3', 'Cenpa', 'Tpx2', 'Cdc20', 'Ccna2', 'Smc4', 'Ube2s', 'Prc1', 'Knl1', 'Kif11', 'Racgap1', 'Tubb5', 'Bub1b', 'Cks1b', 'Cdk1', 'Kif22', 'Mis18bp1', 'Knstrn', 'Smc2', 'Hmgb1', 'Cenpe', 'Incenp', 'Aurkb', 'Pimreg', 'Ccnb1', 'Kif20b', 'Kif23', 'Ckap5', 'Spc24', 'Bub3', 'Ncapd2', 'Lmnb1', 'Aspm', 'Tacc3',…
Cell-cycle	REAC:R-MMU-69278	Cell Cycle, Mitotic	45/500	3e-41	['Ube2c', 'Cdca8', 'Ccnb2', 'Cenpf', 'Birc5', 'Tubb4b', 'Cenpa', 'Tpx2', 'Cdc20', 'Ccna2', 'Smc4', 'Ube2s', 'Hmmr', 'Knl1', 'Tubb5', 'Bub1b', 'Cks1b', 'Cdk1', 'Smc2', 'Incenp', 'Aurkb', 'Ccnb1', 'Kif23', 'Spc24', 'Bub3', 'Lmnb1', 'Ubb', 'Nuf2', 'Spc25', 'Plk1', 'Tuba1c', 'Mad2l1', 'Aurka', 'Rad21', 'Kif20a', 'Dbf4', 'Nde1', 'Ndc80', 'Ncapg', 'Kif2c', 'Sgo2a', 'Rangap1', 'Cdc25b', 'Sgo1', 'Cdca5']
Cell-cycle	REAC:R-MMU-1640170	Cell Cycle	46/577	2.3e-40	['Ube2c', 'Cdca8', 'Ccnb2', 'Cenpf', 'Birc5', 'Tubb4b', 'Cenpa', 'Tpx2', 'Cdc20', 'Ccna2', 'Smc4', 'Ube2s', 'Hmmr', 'Knl1', 'Tubb5', 'Bub1b', 'Cks1b', 'Cdk1', 'Mis18bp1', 'Smc2', 'Incenp', 'Aurkb', 'Ccnb1', 'Kif23', 'Spc24', 'Bub3', 'Lmnb1', 'Ubb', 'Nuf2', 'Spc25', 'Plk1', 'Tuba1c', 'Mad2l1', 'Aurka', 'Rad21', 'Kif20a', 'Dbf4', 'Nde1', 'Ndc80', 'Ncapg', 'Kif2c', 'Sgo2a', 'Rangap1', 'Cdc25b', 'Sgo…
Cell-cycle	REAC:R-MMU-68877	Mitotic Prometaphase	32/179	6.6e-37	['Cdca8', 'Ccnb2', 'Cenpf', 'Birc5', 'Tubb4b', 'Cenpa', 'Cdc20', 'Smc4', 'Knl1', 'Tubb5', 'Bub1b', 'Cdk1', 'Smc2', 'Incenp', 'Aurkb', 'Ccnb1', 'Spc24', 'Bub3', 'Nuf2', 'Spc25', 'Plk1', 'Tuba1c', 'Mad2l1', 'Rad21', 'Nde1', 'Ndc80', 'Ncapg', 'Kif2c', 'Sgo2a', 'Rangap1', 'Sgo1', 'Cdca5']
Cell-cycle	Rodriguez_et_al	Multilineage	43/1038	3.5e-22	Cks1b;Bub1b;Kif22;Knstrn;Prc1;Rangap1;Cks2;Cenpa;Top2a;Tubb5;Ect2;Ccnb2;Hjurp;Cdca8;Arhgap11a;Cdca2;H2afz;Lmnb1;Dbf4;Tpx2;Aspm;Rad21;Nucks1;Kif15;Tacc3;Smc2;Birc5;Mis18bp1;Incenp;Tmpo;Plk1;Ube2s;Cdk1;Smc4;Ckap2l;Anp32e;Hmgb2;Ube2c;Mad2l1;Kif11;Ccna2;Ncapd2;Ccnb1
Cell-cycle	Rodriguez_et_al	High-output	49/1456	4e-22	Cks1b;Bub1b;Kif22;Knstrn;Rangap1;Cks2;Spag5;Cenpa;Top2a;Tubb5;Pbk;Ect2;Ccnb2;Hjurp;Cdca8;Cdca2;Nde1;H2afz;Lmnb1;Dbf4;Tpx2;Aspm;Nucks1;Cdca3;Arl6ip1;H2afv;Kif15;Tacc3;Hist1h1b;Smc2;Birc5;Mis18bp1;Incenp;Ncapg;Ube2s;Cdk1;Smc4;Spc24;Hmgb1;Hist1h2ap;Cdca5;Ckap2l;Ube2c;Mad2l1;Kif11;Anp32e;Aurkb;Ncapd2;Hmgb2
Acute-Activation	GO:0022904	respiratory electron transport chain	9/87	5e-07	['mt-Co1', 'mt-Co2', 'mt-Co3', 'mt-Nd3', 'mt-Nd2', 'mt-Nd1', 'mt-Nd4', 'mt-Cytb', 'mt-Nd5']
Acute-Activation	GO:0042773	ATP synthesis coupled electron transport	8/66	5.4e-07	['mt-Co1', 'mt-Co2', 'mt-Co3', 'mt-Nd3', 'mt-Nd2', 'mt-Nd1', 'mt-Nd4', 'mt-Nd5']
Acute-Activation	GO:0022900	electron transport chain	10/138	5.4e-07	['mt-Co1', 'mt-Co2', 'mt-Co3', 'mt-Nd3', 'mt-Nd2', 'mt-Nd1', 'mt-Nd4', 'mt-Cytb', 'mt-Nd5', 'Por']
Acute-Activation	REAC:R-MMU-163200	Respiratory electron transport, ATP synthesis by chemiosmotic coupling, and heat production by uncoupling proteins.	11/110	3.3e-08	['Ucp2', 'mt-Co1', 'mt-Co2', 'mt-Co3', 'mt-Nd3', 'mt-Nd2', 'mt-Nd1', 'mt-Atp6', 'mt-Nd4', 'mt-Cytb', 'mt-Nd5']
Acute-Activation	REAC:R-MMU-611105	Respiratory electron transport	9/86	6.3e-07	['mt-Co1', 'mt-Co2', 'mt-Co3', 'mt-Nd3', 'mt-Nd2', 'mt-Nd1', 'mt-Nd4', 'mt-Cytb', 'mt-Nd5']
Acute-Activation	REAC:R-MMU-1428517	The citric acid (TCA) cycle and respiratory electron transport	11/160	6.3e-07	['Ucp2', 'mt-Co1', 'mt-Co2', 'mt-Co3', 'mt-Nd3', 'mt-Nd2', 'mt-Nd1', 'mt-Atp6', 'mt-Nd4', 'mt-Cytb', 'mt-Nd5']
Acute-Activation	Rodriguez_et_al	Mk-bias	19/902	6.2e-05	Itm2c;Txnip;Tsc22d1;Mef2c;Cebpb;mt-Nd5;Cytip;H3f3b;Ddit4;Card19;Uba52;Myct1;Msi2;Neurl3;Eef2;Por;mt-Co3;Prdx6;Klf9
Acute-Activation	Cabezas-Wallscheid_et_al	dHSC_aHSC_single-cell	11/309	6.2e-05	Emb;Eef1a1;Uba52;Srgn;Tsc22d3;Pan3;Msi2;Fth1;Txnip;H3f3b;Eef2
Acute-Activation	Rodriguez_et_al	Low-output	25/1513	0.0001	Ctla2a;Gpr132;mt-Nd3;Tsc22d3;Txnip;Tsc22d1;Mef2c;Cebpb;mt-Nd2;Fam107b;mt-Nd5;Pik3ip1;Ddit4;Card19;Myct1;Msi2;Neurl3;Eef2;Srsf5;Ctla2b;Por;Sla2;mt-Co3;Prdx6;Klf9
Acute-Activation	Cabezas-Wallscheid_et_al	dHSC_vs_aHSC	13/788	0.0069	Emb;Cirbp;Eef1a1;Fam107b;Por;Tsc22d3;Pan3;Ifngr1;Txnip;Cytip;Tsc22d1;Dusp2;Eef2
Acute-Activation	Rodriguez_et_al	Serial-engraftment	10/542	0.0074	Cebpb;Irak2;Cdkn1a;Fam107b;mt-Nd5;Srgn;Klf9;Cytip;Tsc22d1;Dusp2
Interferon	GO:0044419	biological process involved in interspecies interaction between organisms	63/1688	3.1e-43	['Cxcl10', 'Rsad2', 'Iigp1', 'Serpina3f', 'Ifit1', 'Isg15', 'Gbp5', 'Ifi203', 'Irgm1', 'Usp18', 'Gbp7', 'Irf1', 'Parp14', 'Cmpk2', 'Mndal', 'Isg20', 'Rtp4', 'Ifit2', 'Ifit3', 'Oasl2', 'Oasl1', 'Ifitm3', 'Herc6', 'Irf7', 'Trim30a', 'Nfkbia', 'Batf', 'Eif2ak2', 'Socs1', 'Slfn8', 'Casp4', 'Gbp2', 'Ifi44', 'Ddx58', 'Ifi204', 'Stat1', 'Parp9', 'Slfn2', 'Trim12a', 'Gbp3', 'Icam1', 'Trafd1', 'Cd274', 'I…
Interferon	GO:0043207	response to external biotic stimulus	61/1565	6.2e-43	['Cxcl10', 'Rsad2', 'Iigp1', 'Serpina3f', 'Ifit1', 'Isg15', 'Gbp5', 'Ifi203', 'Irgm1', 'Usp18', 'Gbp7', 'Irf1', 'Parp14', 'Cmpk2', 'Mndal', 'Isg20', 'Rtp4', 'Ifit2', 'Ifit3', 'Oasl2', 'Oasl1', 'Ifitm3', 'Herc6', 'Irf7', 'Trim30a', 'Nfkbia', 'Batf', 'Eif2ak2', 'Socs1', 'Slfn8', 'Casp4', 'Gbp2', 'Ifi44', 'Ddx58', 'Ifi204', 'Stat1', 'Parp9', 'Slfn2', 'Trim12a', 'Gbp3', 'Trafd1', 'Cd274', 'Ifih1', 'Z…
Interferon	GO:0051707	response to other organism	61/1562	6.2e-43	['Cxcl10', 'Rsad2', 'Iigp1', 'Serpina3f', 'Ifit1', 'Isg15', 'Gbp5', 'Ifi203', 'Irgm1', 'Usp18', 'Gbp7', 'Irf1', 'Parp14', 'Cmpk2', 'Mndal', 'Isg20', 'Rtp4', 'Ifit2', 'Ifit3', 'Oasl2', 'Oasl1', 'Ifitm3', 'Herc6', 'Irf7', 'Trim30a', 'Nfkbia', 'Batf', 'Eif2ak2', 'Socs1', 'Slfn8', 'Casp4', 'Gbp2', 'Ifi44', 'Ddx58', 'Ifi204', 'Stat1', 'Parp9', 'Slfn2', 'Trim12a', 'Gbp3', 'Trafd1', 'Cd274', 'Ifih1', 'Z…
Interferon	REAC:R-MMU-913531	Interferon Signaling	8/59	2.9e-08	['Isg15', 'Usp18', 'Oasl1', 'Eif2ak2', 'Socs1', 'Ddx58', 'Ube2l6', 'Socs3']
Interferon	REAC:R-MMU-1169410	Antiviral mechanism by IFN-stimulated genes	6/28	1.8e-07	['Isg15', 'Usp18', 'Oasl1', 'Eif2ak2', 'Ddx58', 'Ube2l6']
Interferon	REAC:R-MMU-1169408	ISG15 antiviral mechanism	5/24	3.4e-06	['Isg15', 'Usp18', 'Eif2ak2', 'Ddx58', 'Ube2l6']
Interferon	Rodriguez_et_al	Mk-bias	33/902	1e-14	Cited2;Oasl2;Ifi44;Ifi203;Pim1;Junb;Iigp1;Gbp2;Nfkbia;Ly6e;Gbp7;Gbp5;Slfn2;Samsn1;Clec2d;Ehd4;Igtp;Cish;Rtp4;Ncoa7;Irgm2;Zbp1;Ube2l6;Ly6a;Shisa5;Ddx58;Ccnd2;Ifit1;Ifitm3;Serpina3g;Dtx3l;Stat1;Tnfsf10
Interferon	Rodriguez_et_al	Low-output	41/1513	2e-14	Gbp3;Serpina3f;Cited2;Oasl2;Pim1;Gbp2;Iigp1;Ly6e;Gbp7;Znfx1;Gm4951;Gbp5;Slfn2;Samsn1;Tnip3;Clec2d;Ehd4;Igtp;Cish;Rtp4;Ncoa7;Rsad2;Irgm2;Ifit3;Zbp1;Ube2l6;Ly6a;Shisa5;Trim12a;Ccnd2;Ppa1;Ifit1;Ifitm3;Parp14;Isg20;Dtx3l;Serpina3g;Stat1;Ifit2;Tnfsf10;Pnp
Interferon	Cabezas-Wallscheid_et_al	dHSC_vs_aHSC	26/788	7.5e-11	Sp100;Stat2;Irf1;Oasl2;Ifi44;Ccl4;Samhd1;Iigp1;Arid5a;Znfx1;Gm4951;Slfn2;Tnip3;9930111J21Rik2;Irf7;Cish;Icam1;Ccrl2;Relb;Shisa5;Ly6a;Parp14;Trim30a;Slfn8;Slfn5;Pnp
Interferon	Rodriguez_et_al	Serial-engraftment	13/542	0.00025	Ddx58;Ccnd2;Ifitm3;Ly6e;Rtp4;Oasl2;Tnfsf10;Samsn1;Pim1;Samhd1;Junb;Slfn8;Pnp
Interferon cell-cycle	GO:0043170	macromolecule metabolic process	63/9484	0.005	['Psmb9', 'Il18rap', 'Cd47', 'Apobec1', 'Rnf139', 'Vars', 'Pmaip1', 'Smg7', 'Zbtb5', 'Tnip1', 'Bdp1', 'Rnf31', 'Parp8', 'Tcirg1', 'Mgat4a', 'Hivep1', 'Pigv', 'Dot1l', 'Ppm1k', 'Arhgef2', 'Tfe3', 'Mier3', 'Tank', 'Il6st', 'Eif4g2', 'Nfya', 'Med11', 'Fas', 'Stk19', 'Lck', 'Kat6a', 'Rfx5', 'Elf2', 'Wbp4', 'Dyrk2', 'Phrf1', 'Rpp38', 'Cnot4', 'Zbtb18', 'Mob1b', 'Tiparp', 'Cmtr1', 'Aff1', 'Khnyn', 'Mtf…
Interferon cell-cycle	GO:0006807	nitrogen compound metabolic process	63/9669	0.0055	['Psmb9', 'Il18rap', 'Cd47', 'Apobec1', 'Rnf139', 'Vars', 'Pmaip1', 'Smg7', 'Zbtb5', 'Tnip1', 'Bdp1', 'Rnf31', 'Parp8', 'Tcirg1', 'Mgat4a', 'Hivep1', 'Pigv', 'Dot1l', 'Ppm1k', 'Arhgef2', 'Pcyt1a', 'Tfe3', 'Mier3', 'Tank', 'Il6st', 'Eif4g2', 'Nfya', 'Med11', 'Fas', 'Stk19', 'Lck', 'Kat6a', 'Rfx5', 'Elf2', 'Wbp4', 'Dyrk2', 'Phrf1', 'Rpp38', 'Cnot4', 'Zbtb18', 'Mob1b', 'Tiparp', 'Cmtr1', 'Khnyn', 'M…
Interferon cell-cycle	GO:0002376	immune system process	27/2807	0.0066	['Psmb9', 'Il18rap', 'Cd47', 'Apobec1', 'Pmaip1', 'Azi2', 'Rnf31', 'Milr1', 'Tcirg1', 'P2ry14', 'Arhgef2', 'Kif5b', 'Tfe3', 'Ifngr2', 'Il6st', 'Fas', 'Lck', 'Kat6a', 'Stxbp3', 'Cnot4', 'Pafah1b1', 'Tiparp', 'Rara', 'Ankhd1', 'Cyld', 'Tlr7', 'N4bp2l2']
Myeloid	GO:0002376	immune system process	38/2807	2.1e-08	['Tyrobp', 'Lgals1', 'Fcer1g', 'Ctsg', 'Cebpa', 'Cyba', 'Anxa1', 'Anxa2', 'Ppib', 'Lgals3', 'Il3ra', 'Itgb7', 'Ccl9', 'Slpi', 'Itgb2', 'Gpi1', 'Lmo4', 'Anxa3', 'Ms4a2', 'Itga2b', 'Alox5', 'Cnn2', 'Gsn', 'Selenos', 'Pglyrp1', 'Cd300a', 'Ccr2', 'Itgal', 'Rap1a', 'Elane', 'Ccr1', 'Fes', 'Padi2', 'H2-Oa', 'Alas1', 'Sema4a', 'Hp', 'H2-DMb1']
Myeloid	GO:0050900	leukocyte migration	15/361	4e-08	['Fcer1g', 'Anxa1', 'Ppib', 'Lgals3', 'Itgb7', 'Ccl9', 'Itgb2', 'Itga2b', 'Alox5', 'Cd300a', 'Ccr2', 'Itgal', 'Elane', 'Ccr1', 'Padi2']
Myeloid	GO:0006954	inflammatory response	19/732	1.2e-07	['Fcer1g', 'Cebpa', 'Alox5ap', 'Cyba', 'Anxa1', 'Ccl9', 'Itgb2', 'Ms4a2', 'Ltb4r1', 'Csrp3', 'Alox5', 'Selenos', 'Pglyrp1', 'Cd300a', 'Ccr2', 'Elane', 'Ccr1', 'Cd200r3', 'Hp']
Myeloid	REAC:R-MMU-6798695	Neutrophil degranulation	26/500	7.8e-14	['Tyrobp', 'Fcer1g', 'Ctsg', 'Rab44', 'Atp8b4', 'Cyba', 'Npc2', 'Anxa2', 'Ms4a3', 'Hvcn1', 'Ostf1', 'Slpi', 'Gpi1', 'Lamtor2', 'Alox5', 'Cnn2', 'Hk3', 'Dok3', 'Pglyrp1', 'Itgal', 'Rap1a', 'Elane', 'Arpc5', 'Padi2', 'Ggh', 'Hp']
Myeloid	REAC:R-MMU-168249	Innate Immune System	32/998	4.3e-12	['Tyrobp', 'Fcer1g', 'Ctsg', 'Rab44', 'Atp8b4', 'Cyba', 'Npc2', 'Anxa2', 'Ms4a3', 'Hvcn1', 'Ostf1', 'Slpi', 'Gpi1', 'Ms4a2', 'Atox1', 'Lamtor2', 'Atp6v0b', 'Mapkapk3', 'Atp6v0e', 'Alox5', 'Cnn2', 'Hk3', 'Dok3', 'Pglyrp1', 'Itgal', 'Rap1a', 'Elane', 'Arpc5', 'Ncf2', 'Padi2', 'Ggh', 'Hp']
Myeloid	REAC:R-MMU-168256	Immune System	35/1637	1.6e-08	['Tyrobp', 'Fcer1g', 'Ctsg', 'Rab44', 'Atp8b4', 'Cyba', 'Npc2', 'Anxa2', 'Ms4a3', 'Itgb7', 'Hvcn1', 'Ostf1', 'Slpi', 'Gpi1', 'Ms4a2', 'Atox1', 'Lamtor2', 'Atp6v0b', 'Mapkapk3', 'Atp6v0e', 'Alox5', 'Cnn2', 'Hk3', 'Stx3', 'Dok3', 'Pglyrp1', 'Itgal', 'Rap1a', 'Elane', 'Arpc5', 'Ncf2', 'Padi2', 'H2-Oa', 'Ggh', 'Hp']
Myeloid	Rodriguez_et_al	High-output	38/1456	1.8e-12	Rab44;Ltb4r1;Itgal;Stx3;Csgalnact2;Fcgr3;Hk3;Anxa2;Ctsg;Atp8b4;Os9;Cebpa;Lamtor2;Elane;Ccr2;Fam49b;Csrp3;Ccl9;Ap3s1;Tyrobp;Fcer1g;Ly6c2;Atox1;Emilin2;Mcpt8;Ms4a3;1700020L24Rik;Gng12;Myl12a;Itga2b;Fam105a;Cpa3;Lmo4;F630028O10Rik;Alox5;Npc2;Fes;Lgals1
Myeloid	Cabezas-Wallscheid_et_al	dHSC_vs_aHSC	25/788	6e-10	Rab44;Sema4a;Ankrd12;Cyba;Fam129a;Hk3;Anxa2;Ctsg;Atp8b4;Lgals3;Elane;Ccr2;Alas1;Tyrobp;Fcer1g;Pglyrp1;Hdc;Hp;Ccr1;Slpi;Ms4a3;Ncf2;Igsf6;Anxa1;Npc2
Myeloid	Rodriguez_et_al	Multilineage	25/1038	1.1e-07	Rab44;Itgal;Stx3;Csgalnact2;Fcgr2b;Fcgr3;Hk3;Anxa2;Ctsg;Cebpa;Elane;Fam49b;Ccl9;Ap3s1;Tmem258;Emilin2;Slpi;Ms4a3;Fam105a;Cpa3;F630028O10Rik;Npc2;Serp1;Anxa3;Lgals1

## Sheet: treatment_HSC
Treatment	Origin	Pathway	Gene Overlap	Adjusted P-value	Gene names
dmPGE2	GO:0048523	negative regulation of cellular process	83/5068	1.7e-09	['Cebpb', 'Klf2', 'Ctla2a', 'Tsc22d3', 'Plaur', 'Dusp2', 'Klf13', 'Anks1', 'Cdkn1a', 'Klf9', 'Per1', 'Rnf125', 'Pde10a', 'Cirbp', 'Mef2c', 'Pik3ip1', 'Dyrk3', 'Pde4b', 'Ddit4', 'Zbtb20', 'Egfl7', 'Pde4d', 'Ucp2', 'Tnfaip8', 'Cdkn2d', 'Sla2', 'Sik1', 'Irf2bp2', 'Ddx6', 'Hmgb2', 'Khdrbs1', 'Pdcd6', 'Pim3', 'Prkar1a', 'Myh9', 'Rabgef1', 'Gpr132', 'Por', 'Map2k3', 'Foxo3', 'Son', 'Wnk1', 'Abhd17b', '…
dmPGE2	GO:0048519	negative regulation of biological process	85/5544	1.5e-08	['Cebpb', 'Klf2', 'Ctla2a', 'Tsc22d3', 'Plaur', 'Ifngr1', 'Dusp2', 'Klf13', 'Anks1', 'Cdkn1a', 'Klf9', 'Per1', 'Rnf125', 'Pde10a', 'Cirbp', 'Mef2c', 'Pik3ip1', 'Dyrk3', 'Pde4b', 'Ddit4', 'Zbtb20', 'Egfl7', 'Pde4d', 'Ucp2', 'Tnfaip8', 'Cdkn2d', 'Sla2', 'Sik1', 'Irf2bp2', 'Ddx6', 'Hmgb2', 'Khdrbs1', 'P2rx4', 'Pdcd6', 'Pim3', 'Prkar1a', 'Myh9', 'Rabgef1', 'Gpr132', 'Por', 'Map2k3', 'Foxo3', 'Son', '…
dmPGE2	GO:0051172	negative regulation of nitrogen compound metabolic process	50/2542	5.5e-07	['Cebpb', 'Klf2', 'Ctla2a', 'Tsc22d3', 'Plaur', 'Dusp2', 'Anks1', 'Cdkn1a', 'Per1', 'Cirbp', 'Mef2c', 'Ddit4', 'Zbtb20', 'Pde4d', 'Tnfaip8', 'Cdkn2d', 'Sla2', 'Sik1', 'Irf2bp2', 'Ddx6', 'Hmgb2', 'Khdrbs1', 'Prkar1a', 'Rabgef1', 'Por', 'Foxo3', 'Wnk1', 'Txnip', 'Ago2', 'Foxo1', 'Ptbp2', 'Ctla2b', 'Crem', 'Tcf25', 'Fkbp1a', 'Klf10', 'H1f0', 'Ppp3ca', 'Wwc2', 'Larp7', 'Hnrnpd', 'Cltc', 'Swap70', 'Ag…
dmPGE2	GO:0031324	negative regulation of cellular metabolic process	52/2731	5.5e-07	['Cebpb', 'Klf2', 'Ctla2a', 'Tsc22d3', 'Plaur', 'Dusp2', 'Anks1', 'Cdkn1a', 'Per1', 'Cirbp', 'Mef2c', 'Pik3ip1', 'Ddit4', 'Zbtb20', 'Pde4d', 'Tnfaip8', 'Cdkn2d', 'Sla2', 'Sik1', 'Irf2bp2', 'Ddx6', 'Hmgb2', 'Khdrbs1', 'Prkar1a', 'Rabgef1', 'Por', 'Foxo3', 'Wnk1', 'Txnip', 'Ago2', 'Foxo1', 'Ptbp2', 'Ctla2b', 'Crem', 'Ankrd13a', 'Tcf25', 'Fkbp1a', 'Eif4g2', 'Klf10', 'H1f0', 'Ppp3ca', 'Wwc2', 'Larp7'…
dmPGE2	PMID32735825	dmPGE2_VS_CTRL_1H_SLAM-LKS_UP	11/31	2.4e-12	Crem;Plaur;Pim3;Cebpb;Dusp2;Il4ra;Sgk1;Klf2;Fosl2;Pde4b;Egln3
dmPGE2	PMID34129840	PGE2_VS_CTRL_MOUSE_MACROPHAGE_UP	16/138	3.4e-10	Ddit4;Gpr132;Crem;Chd7;Pde4d;Rnf125;Isy1;Sik1;B3gnt5;Cebpb;Cytip;Stat4;Fosl2;Ctla2a;Pde4b;Odc1
GCSF	GO:0022613	ribonucleoprotein complex biogenesis	13/413	6.9e-07	['Eif2s2', 'Ncl', 'Ddx21', 'Nop58', 'Nop56', 'Eif3a', 'Eif3b', 'Pa2g4', 'Ran', 'Nhp2', 'Wdr43', 'Rsl1d1', 'Hsp90aa1']
GCSF	GO:0006412	translation	15/657	1.1e-06	['Eif2s2', 'Eif4ebp1', 'Ncl', 'Nolc1', 'Eif4a1', 'Gspt1', 'Eif5b', 'Serp1', 'Eif3a', 'Pcbp1', 'Nars', 'Eif3b', 'Pa2g4', 'Eprs', 'Mrpl12']
GCSF	GO:0043043	peptide biosynthetic process	15/677	1.1e-06	['Eif2s2', 'Eif4ebp1', 'Ncl', 'Nolc1', 'Eif4a1', 'Gspt1', 'Eif5b', 'Serp1', 'Eif3a', 'Pcbp1', 'Nars', 'Eif3b', 'Pa2g4', 'Eprs', 'Mrpl12']
GCSF	GO:0006518	peptide metabolic process	16/835	1.7e-06	['Eif2s2', 'Eif4ebp1', 'Ncl', 'Nolc1', 'Eif4a1', 'Gspt1', 'Eif5b', 'Serp1', 'Eif3a', 'Pcbp1', 'Nars', 'Eif3b', 'Pa2g4', 'Spcs2', 'Eprs', 'Mrpl12']
GCSF	REAC:R-MMU-8953854	Metabolism of RNA	13/532	0.00017	['Ncl', 'Eif4a1', 'Set', 'Srsf2', 'Ddx21', 'Gspt1', 'Nop58', 'Nop56', 'Pcbp1', 'Wdr43', 'Gnl3', 'Hnrnpf', 'Hnrnpu']
GCSF	REAC:R-MMU-72662	Activation of the mRNA upon binding of the cap-binding complex and eIFs, and subsequent binding to 43S	5/57	0.00058	['Eif2s2', 'Eif4ebp1', 'Eif4a1', 'Eif3a', 'Eif3b']
GCSF	REAC:R-MMU-72766	Translation	8/217	0.00058	['Eif2s2', 'Eif4ebp1', 'Eif4a1', 'Gspt1', 'Eif5b', 'Eif3a', 'Eif3b', 'Mrpl12']
GCSF	REAC:R-MMU-72737	Cap-dependent Translation Initiation	6/116	0.00081	['Eif2s2', 'Eif4ebp1', 'Eif4a1', 'Eif5b', 'Eif3a', 'Eif3b']
pIC	GO:0009607	response to biotic stimulus	94/1601	1.7e-42	['Ifit1', 'Rsad2', 'Irf1', 'Xbp1', 'Iigp1', 'Isg15', 'Batf', 'Gbp5', 'Serpina3f', 'Nfkbia', 'Rtp4', 'Ifit2', 'Irgm1', 'Ifi203', 'Ifit3', 'Oasl2', 'Socs1', 'Plscr1', 'Parp14', 'Usp18', 'Gbp7', 'Tnip3', 'Sbno2', 'Ifi44', 'Cmpk2', 'Cd274', 'Arid5a', 'Slfn8', 'Herc6', 'Jun', 'Casp4', 'Samhd1', 'Zfp36', 'Slfn2', 'Irf7', 'Apobec3', 'Mndal', 'Trim30a', 'Ddx58', 'Trim12a', 'Peli1', 'Isg20', 'Gbp2', 'Eif2…
pIC	GO:0051707	response to other organism	93/1562	1.7e-42	['Ifit1', 'Rsad2', 'Irf1', 'Xbp1', 'Iigp1', 'Isg15', 'Batf', 'Gbp5', 'Serpina3f', 'Nfkbia', 'Rtp4', 'Ifit2', 'Irgm1', 'Ifi203', 'Ifit3', 'Oasl2', 'Socs1', 'Plscr1', 'Parp14', 'Usp18', 'Gbp7', 'Tnip3', 'Sbno2', 'Ifi44', 'Cmpk2', 'Cd274', 'Arid5a', 'Slfn8', 'Herc6', 'Jun', 'Casp4', 'Samhd1', 'Zfp36', 'Slfn2', 'Irf7', 'Apobec3', 'Mndal', 'Trim30a', 'Ddx58', 'Trim12a', 'Peli1', 'Isg20', 'Gbp2', 'Eif2…
pIC	GO:0043207	response to external biotic stimulus	93/1565	1.7e-42	['Ifit1', 'Rsad2', 'Irf1', 'Xbp1', 'Iigp1', 'Isg15', 'Batf', 'Gbp5', 'Serpina3f', 'Nfkbia', 'Rtp4', 'Ifit2', 'Irgm1', 'Ifi203', 'Ifit3', 'Oasl2', 'Socs1', 'Plscr1', 'Parp14', 'Usp18', 'Gbp7', 'Tnip3', 'Sbno2', 'Ifi44', 'Cmpk2', 'Cd274', 'Arid5a', 'Slfn8', 'Herc6', 'Jun', 'Casp4', 'Samhd1', 'Zfp36', 'Slfn2', 'Irf7', 'Apobec3', 'Mndal', 'Trim30a', 'Ddx58', 'Trim12a', 'Peli1', 'Isg20', 'Gbp2', 'Eif2…
pIC	GO:0044419	biological process involved in interspecies interaction between organisms	96/1688	1.7e-42	['Ifit1', 'Rsad2', 'Irf1', 'Xbp1', 'Iigp1', 'Isg15', 'Batf', 'Gbp5', 'Serpina3f', 'Nfkbia', 'Rtp4', 'Ifit2', 'Irgm1', 'Ifi203', 'Ifit3', 'Oasl2', 'Socs1', 'Plscr1', 'Parp14', 'Usp18', 'Gbp7', 'Tnip3', 'Sbno2', 'Ifi44', 'Cmpk2', 'Cd274', 'Arid5a', 'Slfn8', 'Herc6', 'Jun', 'Casp4', 'Samhd1', 'Zfp36', 'Slfn2', 'Irf7', 'Apobec3', 'Mndal', 'Trim30a', 'Ddx58', 'Trim12a', 'Peli1', 'Isg20', 'Gbp2', 'Eif2…
pIC	REAC:R-MMU-1280215	Cytokine Signaling in Immune system	22/363	2.6e-07	['Isg15', 'Nfkbia', 'Socs3', 'Socs2', 'Socs1', 'Usp18', 'Jun', 'Ddx58', 'Peli1', 'Eif2ak2', 'Oasl1', 'Il27', 'Rps6ka3', 'Fos', 'Map3k8', 'Irf9', 'Stat3', 'Ube2l6', 'Myd88', 'Relb', 'Mapkapk2', 'Trim25']
pIC	REAC:R-MMU-913531	Interferon Signaling	10/59	5e-07	['Isg15', 'Socs3', 'Socs1', 'Usp18', 'Ddx58', 'Eif2ak2', 'Oasl1', 'Irf9', 'Ube2l6', 'Trim25']
pIC	REAC:R-MMU-168256	Immune System	47/1637	8.4e-07	['Isg15', 'Nfkbia', 'Socs3', 'Socs2', 'Socs1', 'Usp18', 'Cd274', 'Herc6', 'Jun', 'Casp4', 'Irf7', 'Ddx58', 'Peli1', 'Eif2ak2', 'Oasl1', 'Il27', 'Rps6ka3', 'Icam1', 'Fos', 'Tifa', 'Map3k8', 'Ifitm3', 'H2-Q4', 'Treml2', 'Irf9', 'Stat3', 'Tap1', 'Dtx3l', 'Ube2l6', 'Lamp2', 'Hectd1', 'Bst2', 'Wsb1', 'Lcp2', 'Myd88', 'Tnfaip3', 'Rnf114', 'Enpp4', 'Relb', 'Rnf213', 'Tapbp', 'H2-Q6', 'Mapkapk2', 'Capza2…
pIC	REAC:R-MMU-1169410	Antiviral mechanism by IFN-stimulated genes	7/28	3.8e-06	['Isg15', 'Usp18', 'Ddx58', 'Eif2ak2', 'Oasl1', 'Ube2l6', 'Trim25']
pIC	GSE17721	CTRL_VS_POLYIC_4H_BMDC_DN	18/200	1.2e-06	Nr3c1;Capza2;Casp4;Znfx1;Mitd1;Dhx58;Helz2;Ccnl1;Mapkapk2;Usp25;Gbp2;Irf8;Etnk1;Tap1;Rsad2;Cebpd;Nampt;Atf3
pIC	GSE17721	CTRL_VS_POLYIC_6H_BMDC_DN	13/199	0.0016	Cox17;Snx2;Gbp4;Helz2;Gna13;Ccnl1;Mapkapk2;Usp25;Gbp2;Rnf114;Irf8;Nampt;Cd47
pIC	GSE17721	CTRL_VS_POLYIC_12H_BMDC_DN	12/200	0.0044	Pim1;Capza2;Pml;Gbp4;Mitd1;Ccnl1;Gbp2;Rnf114;Zbp1;Znfx1;Arf4;Cd47
indo	GO:0014072	response to isoquinoline alkaloid	1/39	0.047	['Fosb']
indo	GO:0032570	response to progesterone	1/38	0.047	['Fosb']
indo	GO:0043278	response to morphine	1/38	0.047	['Fosb']
indo	GO:0051385	response to mineralocorticoid	1/45	0.047	['Fosb']

## Sheet: treatment_LSK
Treatment	Origin	Pathway	Gene Overlap	Adjusted P-value	Gene names
dmPGE2	GO:1903706	regulation of hemopoiesis	16/380	2.2e-06	['Cebpb', 'Ctla2a', 'Fos', 'Klf13', 'Zfp36', 'Tgfb1', 'Runx3', 'Lgals9', 'Zfp36l2', 'Inpp5d', 'Hmgb2', 'Mef2c', 'Malt1', 'Nrarp', 'Tob2', 'Mpl']
dmPGE2	GO:0051384	response to glucocorticoid	12/176	2.2e-06	['Cdkn1a', 'mt-Nd3', 'Fos', 'Akap13', 'Dusp1', 'Zfp36', 'Tgfb1', 'Sult1a1', 'Klf9', 'Ddit4', 'Zfp36l2', 'Gstp1']
dmPGE2	GO:0031960	response to corticosteroid	12/194	2.2e-06	['Cdkn1a', 'mt-Nd3', 'Fos', 'Akap13', 'Dusp1', 'Zfp36', 'Tgfb1', 'Sult1a1', 'Klf9', 'Ddit4', 'Zfp36l2', 'Gstp1']
dmPGE2	GO:0048523	negative regulation of cellular process	61/5068	2.2e-06	['Cebpb', 'Tsc22d3', 'Pde4b', 'Plaur', 'Ctla2a', 'Cdkn1a', 'Rgs1', 'Cirbp', 'Per1', 'Rnf125', 'Pik3ip1', 'Anks1', 'Klf2', 'Pde10a', 'Abhd17b', 'Dusp1', 'Mcl1', 'Txnip', 'Klf13', 'Map2k3', 'Rasa2', 'Zfp36', 'Tgfb1', 'Runx3', 'H3f3b', 'Klf9', 'Lgals9', 'Ucp2', 'Runx2', 'Ddit4', 'Btg1', 'Zfp36l2', 'Pde4d', 'Gpr132', 'Sik1', 'Inpp5d', 'Myh9', 'Jdp2', 'Hmgb2', 'Mef2c', 'Sla2', 'Dusp5', 'Ier3', 'Dusp2'…
dmPGE2	PMID32735825	dmPGE2_VS_CTRL_1H_SLAM-LKS_UP	14/31	8.2e-19	Ier2;Crem;Pde4b;Dusp1;Bcl2l11;Pim3;Plaur;Cebpb;Dusp2;Klf2;Fosl2;Dusp5;Hk2;Fos
dmPGE2	PMID34129840	PGE2_VS_CTRL_MOUSE_MACROPHAGE_UP	20/138	2.6e-16	Crem;B3gnt5;Pde4b;Dusp5;Sipa1l1;Ddit4;Gpr132;Pde4d;Rnf125;Ier3;Sik1;Cebpb;Cytip;Fosl2;Ctla2a;Stat4;Runx3;Odc1;Fos;Bend4
dmPGE2	PMID21474107	dmPGE2_VS_CTRL_1H_HUMAN_HSPCS_UP	7/110	0.0018	Crem;Cdkn1a;Rgs1;Ywhaz;Pde4b;Runx3;Malt1
GCSF	GO:0022613	ribonucleoprotein complex biogenesis	57/413	1e-39	['Nop56', 'Ncl', 'Nop58', 'Eif2s2', 'Ppan', 'Wdr43', 'Rsl1d1', 'Nhp2', 'Mphosph10', 'Mrto4', 'C1qbp', 'Gtpbp4', 'Dkc1', 'Pa2g4', 'Lyar', 'Abce1', 'Eif3b', 'Mrpl20', 'Ddx21', 'Gar1', 'Strap', 'Hsp90aa1', 'Snu13', 'Eif3a', 'Mybbp1a', 'Rrp1b', 'Srpk1', 'Ran', 'Ptges3', 'Exosc1', 'Ftsj3', 'Rrs1', 'Nifk', 'Eif3g', 'Ltv1', 'Sdad1', 'Nip7', 'Wdr12', 'Nop16', 'Rcl1', 'Utp18', 'Srsf10', 'Rrp15', 'Fbl', 'W…
GCSF	GO:0042254	ribosome biogenesis	47/288	8.6e-36	['Nop56', 'Ncl', 'Nop58', 'Ppan', 'Wdr43', 'Rsl1d1', 'Nhp2', 'Mphosph10', 'Mrto4', 'C1qbp', 'Gtpbp4', 'Dkc1', 'Pa2g4', 'Lyar', 'Abce1', 'Mrpl20', 'Ddx21', 'Gar1', 'Snu13', 'Mybbp1a', 'Rrp1b', 'Ran', 'Exosc1', 'Ftsj3', 'Rrs1', 'Nifk', 'Ltv1', 'Sdad1', 'Nip7', 'Wdr12', 'Nop16', 'Rcl1', 'Utp18', 'Rrp15', 'Fbl', 'Wdr46', 'Rpl7l1', 'Rrp9', 'Nop14', 'Esf1', 'Ebna1bp2', 'Ddx27', 'Mak16', 'Rsl24d1', 'Utp…
GCSF	GO:0034660	ncRNA metabolic process	49/449	4.2e-29	['Ncl', 'Nolc1', 'Ppan', 'Wdr43', 'Rsl1d1', 'Nhp2', 'Mphosph10', 'Mrto4', 'Gtpbp4', 'Mettl1', 'Dkc1', 'Nars', 'Pa2g4', 'Lyar', 'Ddx21', 'Gar1', 'Tars', 'Snu13', 'Rrp1b', 'Exosc1', 'Ftsj3', 'Rrs1', 'Nsun2', 'Nifk', 'Iars', 'Wdr12', 'Eprs', 'Gars', 'Ssb', 'Pus1', 'Rcl1', 'Utp18', 'Rrp15', 'Yars', 'Fbl', 'Wdr46', 'Rpl7l1', 'Rrp9', 'Nop14', 'Esf1', 'Ebna1bp2', 'Ddx27', 'Mak16', 'Rars', 'Sars', 'Hras'…
GCSF	GO:0034641	cellular nitrogen compound metabolic process	166/6201	2.7e-28	['Srm', 'Gnl3', 'Ncl', 'Nolc1', 'Srsf7', 'Eif2s2', 'Hspd1', 'Gspt1', 'Ppan', 'Wdr43', 'Rsl1d1', 'Nhp2', 'Set', 'Eif4ebp1', 'Rps6ka3', 'Mrpl12', 'Eif4g2', 'Nme1', 'Mphosph10', 'Eif1a', 'Mrto4', 'C1qbp', 'Gtpbp4', 'Srsf2', 'Dnajc2', 'Nr2f6', 'Mettl1', 'Dkc1', 'Nars', 'Pa2g4', 'Lyar', 'Eif5b', 'Apex1', 'Abce1', 'Eif3b', 'Aen', 'Fut8', 'Mrpl20', 'Hnrnpd', 'Eif4a1', 'Ddx21', 'Gar1', 'Hnrnpab', 'Chchd4…
GCSF	REAC:R-MMU-8953854	Metabolism of RNA	49/532	1.7e-21	['Gnl3', 'Nop56', 'Ncl', 'Nop58', 'Gspt1', 'Wdr43', 'Set', 'Mphosph10', 'Srsf2', 'Hnrnpd', 'Eif4a1', 'Ddx21', 'Snu13', 'Srsf9', 'Pcbp1', 'Exosc1', 'Psmd12', 'Ftsj3', 'Hnrnpf', 'Etf1', 'Ltv1', 'Psmc5', 'Wdr77', 'Nip7', 'Wdr12', 'Hnrnpu', 'Eif4e', 'Sf3b3', 'U2af1', 'Ybx1', 'Phf5a', 'Psmb5', 'Psmd7', 'Psma3', 'Snrpa1', 'Pno1', 'Rcl1', 'Utp18', 'Fbl', 'Wdr46', 'Rrp9', 'Nop14', 'Hspa8', 'Tra2b', 'Ebna…
GCSF	REAC:R-MMU-8868773	rRNA processing in the nucleus and cytosol	22/167	4.9e-12	['Gnl3', 'Nop56', 'Ncl', 'Nop58', 'Wdr43', 'Mphosph10', 'Ddx21', 'Snu13', 'Exosc1', 'Ftsj3', 'Ltv1', 'Nip7', 'Wdr12', 'Pno1', 'Rcl1', 'Utp18', 'Fbl', 'Wdr46', 'Rrp9', 'Nop14', 'Ebna1bp2', 'Utp14a']
GCSF	REAC:R-MMU-72312	rRNA processing	22/167	4.9e-12	['Gnl3', 'Nop56', 'Ncl', 'Nop58', 'Wdr43', 'Mphosph10', 'Ddx21', 'Snu13', 'Exosc1', 'Ftsj3', 'Ltv1', 'Nip7', 'Wdr12', 'Pno1', 'Rcl1', 'Utp18', 'Fbl', 'Wdr46', 'Rrp9', 'Nop14', 'Ebna1bp2', 'Utp14a']
GCSF	REAC:R-MMU-6791226	Major pathway of rRNA processing in the nucleolus and cytosol	22/167	4.9e-12	['Gnl3', 'Nop56', 'Ncl', 'Nop58', 'Wdr43', 'Mphosph10', 'Ddx21', 'Snu13', 'Exosc1', 'Ftsj3', 'Ltv1', 'Nip7', 'Wdr12', 'Pno1', 'Rcl1', 'Utp18', 'Fbl', 'Wdr46', 'Rrp9', 'Nop14', 'Ebna1bp2', 'Utp14a']
pIC	GO:0044419	biological process involved in interspecies interaction between organisms	81/1688	4.7e-47	['Cxcl10', 'Rsad2', 'Ifit1', 'Iigp1', 'Isg15', 'Rtp4', 'Irgm1', 'Usp18', 'Irf1', 'Oasl2', 'Parp14', 'Ifi203', 'Ccl4', 'Ifit3', 'Gbp7', 'Cmpk2', 'Gbp5', 'Serpina3f', 'Socs1', 'Herc6', 'Ifi44', 'Ifit2', 'Slfn8', 'Irf7', 'Trim30a', 'Nfkbia', 'Ifitm3', 'Isg20', 'Oasl1', 'Eif2ak2', 'Mndal', 'Stat1', 'Trim12a', 'Ddx58', 'Batf', 'Casp4', 'Ly6a', 'Parp9', 'Arid5a', 'Ly6e', 'Trim12c', 'Jun', 'Cd274', 'Gbp…
pIC	GO:0051707	response to other organism	78/1562	1.7e-46	['Cxcl10', 'Rsad2', 'Ifit1', 'Iigp1', 'Isg15', 'Rtp4', 'Irgm1', 'Usp18', 'Irf1', 'Oasl2', 'Parp14', 'Ifi203', 'Ccl4', 'Ifit3', 'Gbp7', 'Cmpk2', 'Gbp5', 'Serpina3f', 'Socs1', 'Herc6', 'Ifi44', 'Ifit2', 'Slfn8', 'Irf7', 'Trim30a', 'Nfkbia', 'Ifitm3', 'Isg20', 'Oasl1', 'Eif2ak2', 'Mndal', 'Stat1', 'Trim12a', 'Ddx58', 'Batf', 'Casp4', 'Ly6a', 'Parp9', 'Arid5a', 'Trim12c', 'Jun', 'Cd274', 'Gbp2', 'Apo…
pIC	GO:0043207	response to external biotic stimulus	78/1565	1.7e-46	['Cxcl10', 'Rsad2', 'Ifit1', 'Iigp1', 'Isg15', 'Rtp4', 'Irgm1', 'Usp18', 'Irf1', 'Oasl2', 'Parp14', 'Ifi203', 'Ccl4', 'Ifit3', 'Gbp7', 'Cmpk2', 'Gbp5', 'Serpina3f', 'Socs1', 'Herc6', 'Ifi44', 'Ifit2', 'Slfn8', 'Irf7', 'Trim30a', 'Nfkbia', 'Ifitm3', 'Isg20', 'Oasl1', 'Eif2ak2', 'Mndal', 'Stat1', 'Trim12a', 'Ddx58', 'Batf', 'Casp4', 'Ly6a', 'Parp9', 'Arid5a', 'Trim12c', 'Jun', 'Cd274', 'Gbp2', 'Apo…
pIC	GO:0009607	response to biotic stimulus	78/1601	7.2e-46	['Cxcl10', 'Rsad2', 'Ifit1', 'Iigp1', 'Isg15', 'Rtp4', 'Irgm1', 'Usp18', 'Irf1', 'Oasl2', 'Parp14', 'Ifi203', 'Ccl4', 'Ifit3', 'Gbp7', 'Cmpk2', 'Gbp5', 'Serpina3f', 'Socs1', 'Herc6', 'Ifi44', 'Ifit2', 'Slfn8', 'Irf7', 'Trim30a', 'Nfkbia', 'Ifitm3', 'Isg20', 'Oasl1', 'Eif2ak2', 'Mndal', 'Stat1', 'Trim12a', 'Ddx58', 'Batf', 'Casp4', 'Ly6a', 'Parp9', 'Arid5a', 'Trim12c', 'Jun', 'Cd274', 'Gbp2', 'Apo…
pIC	REAC:R-MMU-913531	Interferon Signaling	9/59	3.1e-08	['Isg15', 'Usp18', 'Socs1', 'Socs3', 'Oasl1', 'Eif2ak2', 'Ddx58', 'Irf9', 'Ube2l6']
pIC	REAC:R-MMU-1280215	Cytokine Signaling in Immune system	17/363	3.1e-08	['Isg15', 'Usp18', 'Socs1', 'Nfkbia', 'Socs3', 'Oasl1', 'Eif2ak2', 'Ddx58', 'Jun', 'Irf9', 'Socs2', 'Peli1', 'Stat3', 'Ube2l6', 'Myd88', 'Nfkb1', 'Map3k8']
pIC	REAC:R-MMU-168256	Immune System	33/1637	6.2e-08	['Isg15', 'Usp18', 'Socs1', 'Herc6', 'Irf7', 'Nfkbia', 'Socs3', 'Ifitm3', 'Oasl1', 'Eif2ak2', 'Ddx58', 'Casp4', 'Jun', 'Cd274', 'Dtx3l', 'Treml2', 'Icam1', 'Ifi204', 'Bst2', 'Rnf213', 'Tap1', 'Irf9', 'Socs2', 'Peli1', 'Stat3', 'Ube2l6', 'Plac8', 'Rnf114', 'Myd88', 'Tapbp', 'Capza2', 'Nfkb1', 'Map3k8']
pIC	REAC:R-MMU-1169410	Antiviral mechanism by IFN-stimulated genes	6/28	1.8e-06	['Isg15', 'Usp18', 'Oasl1', 'Eif2ak2', 'Ddx58', 'Ube2l6']
pIC	GSE17721	CTRL_VS_POLYIC_4H_BMDC_DN	14/200	1.9e-06	Epsti1;Capza2;Casp4;Znfx1;Dhx58;Helz2;Ccnl1;Gbp2;Usp25;Etnk1;Tap1;Rsad2;Nampt;Atf3
pIC	GSE17721	CTRL_VS_POLYIC_12H_BMDC_DN	9/200	0.0073	Epsti1;Pim1;Capza2;Pml;Ccnl1;Gbp2;Rnf114;Znfx1;Zbp1

## Sheet: enrichment_G-CSF_all
G-CSF pathway enrichment is shown for all pathways (no p-value cutoff)
HSCs
Origin + Pathway	Gene Overlap	Adjusted P-value	Gene names
GSE17721_CTRL_VS_POLYIC_8H_BMDC_DN	1/199	0.661217	Eif2s2
GSE21033_CTRL_VS_POLYIC_STIM_DC_12H_DN	3/200	0.239182	Ldha;Wdr43;G3bp1
GSE21033_CTRL_VS_POLYIC_STIM_DC_1H_DN	3/198	0.239182	Ybx3;Cdv3;Eif4a1
CHEMNITZ_RESPONSE_TO_PROSTAGLANDIN_E2_UP	1/147	0.661217	Eif4ebp1
GSE17721_CTRL_VS_POLYIC_0.5H_BMDC_UP	2/200	0.567023	Lrrc59;Eif2s2
GSE17721_CTRL_VS_POLYIC_12H_BMDC_DN	3/200	0.239182	Cacybp;Gspt1;Eif2s2
GSE17721_CTRL_VS_POLYIC_1H_BMDC_DN	1/199	0.661217	Hspa5
GSE17721_CTRL_VS_POLYIC_1H_BMDC_UP	1/200	0.661217	Eif3b
GSE17721_CTRL_VS_POLYIC_24H_BMDC_DN	1/200	0.661217	Nupr1
GSE17721_CTRL_VS_POLYIC_2H_BMDC_DN	2/200	0.567023	Nop58;Nupr1
GSE17721_CTRL_VS_POLYIC_4H_BMDC_DN	1/200	0.661217	Nupr1
GSE17721_CTRL_VS_POLYIC_6H_BMDC_DN	1/199	0.661217	Wdr43
GSE17721_CTRL_VS_POLYIC_8H_BMDC_UP	3/199	0.239182	Nolc1;Mgat2;Nhp2
GSE21033_CTRL_VS_POLYIC_STIM_DC_1H_DN	3/198	0.239182	Ybx3;Cdv3;Eif4a1
GSE21033_CTRL_VS_POLYIC_STIM_DC_1H_UP	1/196	0.661217	Ybx3
GSE21033_CTRL_VS_POLYIC_STIM_DC_24H_DN	1/159	0.661217	Slc25a5
GSE21033_CTRL_VS_POLYIC_STIM_DC_24H_UP	1/156	0.661217	Tagln2
GSE21033_CTRL_VS_POLYIC_STIM_DC_3H_UP	1/200	0.661217	Fut8
GSE21033_CTRL_VS_POLYIC_STIM_DC_6H_DN	1/157	0.661217	Fut8
GSE21033_CTRL_VS_POLYIC_STIM_DC_6H_UP	3/200	0.239182	Ddx21;Cdv3;Eif4a1
GSE21927_SPLEEN_MONOCYTE_VS_GMCSF_GCSF_BONE_MARROW_DN	1/196	0.661217	Plcg2
GSE21927_UNTREATED_VS_GMCSF_GCSF_TREATED_BONE_MARROW_DN	1/192	0.661217	Myb
GSE39556_UNTREATED_VS_3H_POLYIC_INJ_MOUSE_NK_CELL_DN	2/200	0.567023	Ybx3;Myb
PMID21474107_dmPGE2_VS_CTRL_1H_HUMAN_HSPCS_ALL_doses_UP	1/261	0.73842	Ifitm1
PMID27481851_GCSF_VS_CTRL_5D_HUMAN_PMN_BMandPB_UP	1/1110	0.995769	Ldha
PMID29915358_up_GCSF_VS_CTRL_48h_MOUSE_HSCs	1/13	0.239182	Prtn3
PMID30249060_GCSF_VS_CTRL_BRAIN_UP	5/354	0.239182	Set;Eif3a;Ubxn4;Nolc1;Nop56
PMID32735825_dmPGE2_VS_CTRL_1H_SLAM-LKS_UP	1/13	0.424357	Mat2a
LSKs
Origin + Pathway	Gene Overlap	Adjusted P-value	Gene names
GSE17721_CTRL_VS_POLYIC_8H_BMDC_DN	4/199	0.999939	Lap3;Eif2s2;G3bp2;Ranbp1
GSE21033_CTRL_VS_POLYIC_STIM_DC_12H_DN	8/200	0.242086	Gmps;G3bp1;Psmb5;Mrps10;Usp10;Ldha;Wdr43;Strap
GSE21033_CTRL_VS_POLYIC_STIM_DC_1H_DN	7/198	0.298556	Bzw1;Usp7;Baz1a;Aen;Ybx3;Cdv3;Eif4a1
CHEMNITZ_RESPONSE_TO_PROSTAGLANDIN_E2_UP	7/147	0.242086	Gmps;Larp1;Nop16;Hspa9;Slc7a1;Eif4ebp1;Mthfd2
GSE17721_CTRL_VS_POLYIC_0.5H_BMDC_UP	7/200	0.298556	Grwd1;Ifitm2;Nsun2;Lrrc59;Lap3;Mogs;Eif2s2
GSE17721_CTRL_VS_POLYIC_12H_BMDC_DN	7/200	0.298556	Cacybp;Gspt1;Srsf7;Pfdn2;Eif2s1;Dnajb11;Eif2s2
GSE17721_CTRL_VS_POLYIC_1H_BMDC_DN	4/199	0.999939	Eif2s1;Cebpz;C1qbp;Hspa5
GSE17721_CTRL_VS_POLYIC_1H_BMDC_UP	3/200	0.999939	Slc7a1;Eif3b;Aprt
GSE17721_CTRL_VS_POLYIC_24H_BMDC_DN	6/200	0.565966	Hnrnpd;Tgm2;G3bp2;Basp1;Lap3;Ranbp1
GSE17721_CTRL_VS_POLYIC_24H_BMDC_UP	3/199	0.999939	Tomm20;Xbp1;Pno1
GSE17721_CTRL_VS_POLYIC_2H_BMDC_DN	2/200	0.999939	Nop58;St6galnac4
GSE17721_CTRL_VS_POLYIC_4H_BMDC_DN	2/200	0.999939	G3bp2;Ebna1bp2
GSE17721_CTRL_VS_POLYIC_6H_BMDC_DN	5/199	0.773033	G3bp2;Tra2b;Wdr43;Ppig;Eif2s1
GSE17721_CTRL_VS_POLYIC_8H_BMDC_UP	9/199	0.242086	Mgat2;Nhp2;Pum3;Xbp1;Gadd45gip1;Pno1;C1qbp;Nolc1;Cct8
GSE21033_CTRL_VS_POLYIC_STIM_DC_1H_DN	7/198	0.298556	Bzw1;Usp7;Baz1a;Aen;Ybx3;Cdv3;Eif4a1
GSE21033_CTRL_VS_POLYIC_STIM_DC_1H_UP	2/196	0.999939	Ubap2l;Ybx3
GSE21033_CTRL_VS_POLYIC_STIM_DC_24H_DN	8/159	0.242086	Mrps18b;Gar1;Slc25a5;Gpatch4;Dnaja2;Cnbp;Lyar;Srpk1
GSE21033_CTRL_VS_POLYIC_STIM_DC_24H_UP	1/156	0.999939	Bzw2
GSE21033_CTRL_VS_POLYIC_STIM_DC_3H_DN	2/199	0.999939	Mphosph10;Rrp1b
GSE21033_CTRL_VS_POLYIC_STIM_DC_3H_UP	3/200	0.999939	Ddx46;Mrpl17;Fut8
GSE21033_CTRL_VS_POLYIC_STIM_DC_6H_DN	2/157	0.999939	Ddx46;Fut8
GSE21033_CTRL_VS_POLYIC_STIM_DC_6H_UP	5/200	0.773033	Usp7;Hspa9;Ddx21;Cdv3;Eif4a1
GSE21927_SPLEEN_MONOCYTE_VS_GMCSF_GCSF_BONE_MARROW_DN	7/196	0.298556	Plcg2;Umps;G3bp2;Basp1;Ssb;Timm10;Pus1
GSE21927_SPLEEN_MONOCYTE_VS_GMCSF_GCSF_BONE_MARROW_UP	2/189	0.999939	Usp7;Umps
GSE21927_UNTREATED_VS_GMCSF_GCSF_TREATED_BONE_MARROW_DN	2/192	0.999939	Syncrip;Gtpbp4
GSE21927_UNTREATED_VS_GMCSF_GCSF_TREATED_BONE_MARROW_UP	8/196	0.242086	Skap2;Wdr12;Aimp2;Rsl24d1;Nifk;Mtap;Rad23b;Mrpl19
GSE39556_UNTREATED_VS_3H_POLYIC_INJ_MOUSE_CD8A_DC_DN	1/200	0.999939	Prmt1
GSE39556_UNTREATED_VS_3H_POLYIC_INJ_MOUSE_CD8A_DC_UP	1/200	0.999939	Mpp6
GSE39556_UNTREATED_VS_3H_POLYIC_INJ_MOUSE_NK_CELL_DN	2/200	0.999939	Eif1;Ybx3
PMID21474107_dmPGE2_VS_CTRL_1H_HUMAN_HSPCS_ALL_doses_UP	4/261	0.999939	Ifitm1;Eif5a;Rad23b;Ifitm2
PMID21474107_dmPGE2_VS_CTRL_1H_HUMAN_HSPCS_UP	1/110	0.999939	Tra2b
PMID27481851_GCSF_VS_CTRL_5D_HUMAN_PMN_BMandPB_UP	7/1110	0.999939	Hnrnpd;Pgp;Aprt;Larp1;Anp32b;Wdr77;Ldha
PMID29915358_up_GCSF_VS_CTRL_48h_MOUSE_HSCs	1/13	0.630524	Prtn3
PMID30249060_GCSF_VS_CTRL_BRAIN_UP	12/354	0.242086	Apex1;G3bp2;Set;Larp1;Mpp6;Srsf7;Eif3a;Ubxn4;Nolc1;Flot1;Nop56;Sf3b3
PMID32735825_dmPGE2_VS_CTRL_1H_SLAM-LKS_UP	1/31	0.979094	Mat2a
PMID34129840_PGE2_VS_CTRL_MOUSE_MACROPHAGE_UP	2/138	0.999939	Tgm2;Rrp1b
REACTOME_SYNTHESIS_OF_PROSTAGLANDINS_PG_AND_THROMBOXANES_TX	1/15	0.663286	Ptges3
