# Supplementary material for: External signals regulate continuous transcriptional states in hematopoietic stem cells
Source: eLife. 2021 Dec 23;10:e66512. doi: 10.7554/eLife.66512 (PMC8700284; doi:10.7554/eLife.66512)
Supplement: Supplementary file 7. — Each tab contains a treatment vs. control comparison (16,16-dimethyl prostaglandin E2 [dmPGE2], Indo, poly(I:C), granulocyte colony-stimulating factor [G-CSF]). Each cluster was compared to its respective control cluster. Log fold change and adjusted p-value from the Hurdle model are listed for genes with p-values < 0.01. [file elife-66512-supp7.xlsx]

## Sheet: dmPGE2
primerid	logFC_HSC_Metabolism	adj_p-value_HSC_Metabolism	logFC_HSC_Quiescent	adj_p-value_HSC_Quiescent	logFC_HSC_Activated	adj_p-value_HSC_Activated	logFC_HSC_Interferon	adj_p-value_HSC_Interferon	logFC_HSC_Acute-Activation	adj_p-value_HSC_Acute-Activation	logFC_HSC_Cell-cycle	adj_p-value_HSC_Cell-cycle	logFC_HSC_pooled	adj_p-value_HSC_pooled	logFC_MPP0_surface	adj_p-value_MPP0_surface	logFC_MPP1_surface	adj_p-value_MPP1_surface	logFC_MPP2_surface	adj_p-value_MPP2_surface	logFC_MPP3/4_surface	adj_p-value_MPP3/4_surface	logFC_LSK_Primed	adj_p-value_LSK_Primed	logFC_LSK_Metabolism	adj_p-value_LSK_Metabolism	logFC_LSK_Primitive	adj_p-value_LSK_Primitive	logFC_LSK_Cell-cycle	adj_p-value_LSK_Cell-cycle	logFC_LSK_Acute-Activation	adj_p-value_LSK_Acute-Activation	logFC_LSK_Interferon	adj_p-value_LSK_Interferon	logFC_LSK_Interferon cell-cycle	adj_p-value_LSK_Interferon cell-cycle	logFC_LSK_Myeloid	adj_p-value_LSK_Myeloid	logFC_LSK_pooled	adj_p-value_LSK_pooled
0610009B22Rik													-0.120123	5.78821e-11	-0.105191	5.86526e-11	-0.136013	2.72108e-10	-0.132363	4.68496e-25	-0.128853	1.14353e-13			-0.155819	1.36476e-06			-0.144857	0.000844525									-0.127169	3.23691e-14
0610010K14Rik													0.00624272	0.00198488	0.0497221	0.00887725	0.0810554	0.00462805
0610012G03Rik													-0.108959	0.000577439					-0.0705763	3.52241e-05	-0.0977054	1.36512e-05																	-0.0697571	0.00323872
0610030E20Rik																			-0.0464656	0.00299881	-0.0788184	3.05039e-05																	-0.0618865	0.0019776
1110002L01Rik													-0.0457288	1.51164e-05	-0.027761	0.000523849			-0.0254859	2.67498e-06	-0.0352304	3.81894e-05																	-0.0356557	3.92611e-06
1110004E09Rik													-0.0533526	0.00387087
1110004F10Rik													0.0941895	0.003337	0.0718577	0.00282056	0.105499	0.000132451			0.0896001	2.77491e-05																	0.0819274	0.000123325
1110008F13Rik													-0.2359	9.21719e-16	-0.110552	7.40716e-08	-0.106875	9.13553e-05	-0.0836623	2.82678e-07
1110008P14Rik																			-0.0235057	0.00349771
1110012L19Rik															-0.0487352	0.00345859
1110019D14Rik													-0.0348967	0.000250702	-0.0367079	7.10457e-06			-0.0320789	8.78351e-09	-0.0286911	0.000352085																	-0.0295918	0.000521089
1110032A03Rik																	-0.018371	0.00855133
1110034G24Rik															-0.0317951	0.000191297
1110038F14Rik													-0.0396997	0.00925065
1190005I06Rik													-0.0148819	0.0032969
1190007I07Rik													-0.12954	3.83113e-11	-0.107374	4.53179e-09	-0.0768584	0.00555345	-0.0899252	3.01733e-10	-0.0755809	3.52685e-06																	-0.0736171	0.000310291
1300002E11Rik															-0.0423114	8.12638e-05			-0.0474155	5.84112e-08
1500009L16Rik													-0.0960087	2.58426e-10			-0.088528	0.00612389			-0.0503265	0.00260208							-0.174765	0.000978525
1500011B03Rik																			0.0342574	0.00188382
1500011K16Rik													-0.0756995	0.00756808			-0.0760011	0.00725514	-0.0814796	3.0063e-09	-0.0877047	1.84845e-06																	-0.0825031	7.0099e-06
1600002K03Rik																					-0.0446158	7.75449e-05																	-0.0494038	7.35827e-06
1600014C10Rik															-0.0522616	1.625e-06
1700008J07Rik													-0.0282679	0.00703641
1700017B05Rik	0.279189	2.95656e-09			0.301689	3.29151e-08							0.303236	1.14873e-47	0.34302	1.95952e-70	0.224523	2.01668e-23	0.266836	5.51312e-73	0.384704	2.28784e-92	0.338531	0.000111675	0.242482	1.06761e-12	0.27944	5.40469e-05	0.463757	7.26231e-21			-0.394676	0.00307387					0.365269	1.46293e-78
1700020I14Rik																			-0.015808	0.00388055	-0.0988566	6.74789e-06																	-0.0521009	0.00762027
1700020L24Rik																			0.0250407	3.06045e-05
1700021F05Rik													-0.0453402	0.000451719			-0.0615898	0.00049849	-0.0364263	0.00230444	-0.0433158	0.00224465
1700029J07Rik															-0.0262904	0.00334915					-0.0218243	0.004275																	-0.0226211	0.00430098
1700030K09Rik															-0.0328369	0.00344843					-0.0293596	0.0026153																	-0.0277418	0.00549223
1700037C18Rik																																							-0.0263465	0.00625926
1700097N02Rik													-0.0225412	0.00780144					0.0226917	0.000852163
1700109H08Rik																			0.0222478	0.000281411
1700113A16Rik																					-0.0391941	0.000746569
1700123O20Rik													-0.0888048	0.000655554	-0.0604755	0.000428771	-0.126759	1.77768e-07
1810011H11Rik															-0.0462294	0.000375998	-0.050421	0.00286888																					-0.0365208	0.00786878
1810022K09Rik													-0.0355619	0.00166743
1810030O07Rik																					-0.077981	8.65307e-06																	-0.0546792	0.00409484
1810037I17Rik													-0.0372005	0.000320048					-0.103317	4.31865e-09	-0.0918733	3.26032e-05																	-0.0699434	0.00604602
1810055G02Rik																			0.0501221	1.02835e-21	0.0508831	1.92718e-10			0.0743035	0.000143209													0.0562427	5.69816e-13
1810058I24Rik															-0.0775804	0.000647076	-0.0982089	0.00159029	-0.0901643	1.54819e-07	-0.125035	6.58115e-09			-0.191275	0.000638913													-0.0974642	7.27177e-06
2010107E04Rik			0.413121	0.0098305									0.141501	8.52211e-05
2210016F16Rik													-0.0587909	0.00381629																									-0.0406767	0.00821437
2210016L21Rik													-0.111258	2.55274e-05					-0.0892173	3.28017e-09	-0.0685054	0.000517307																	-0.0729177	0.000312757
2310001H17Rik													-0.0800881	0.00377009	-0.0805979	5.69143e-07	-0.108743	8.12077e-07			-0.0543009	0.000435234																	-0.0692434	8.0007e-06
2310011J03Rik													-0.0636954	0.000882531	-0.102032	2.66285e-07	-0.119068	2.62331e-05	-0.0527261	2.66369e-05	-0.0722244	0.00108562																	-0.075839	0.000401626
2310033P09Rik													-0.0994299	4.54305e-05	-0.107199	6.2336e-09	-0.127463	4.78632e-07	-0.154641	1.07899e-26	-0.109829	3.35502e-08			-0.186109	1.68987e-05													-0.121791	1.95082e-10
2310035C23Rik													0.0660027	0.000879425					0.0470049	0.000196947	0.0423938	0.00106694
2310039H08Rik																			-0.0497164	0.00715934
2310040G24Rik																			-0.0181506	0.00319884																			-0.0214819	0.00465037
2310061I04Rik					-0.096336	0.00447021							-0.0670115	3.43928e-06	-0.0654983	2.14059e-07			-0.0744291	2.11739e-12	-0.0366604	0.00319556																	-0.0575092	5.70595e-05
2410002F23Rik													0.107322	0.000132262	0.158651	3.85068e-17	0.152603	1.37253e-08	0.129518	1.16206e-17	0.100103	6.6493e-06																	0.108791	5.01027e-07
2410004B18Rik															-0.0454904	0.0058541			-0.0711843	6.14563e-10
2410015M20Rik													-0.1227	5.29364e-07					-0.0911583	3.04427e-09	-0.0567129	0.0072172
2510002D24Rik													-0.0711034	0.00384893	-0.0739234	2.04254e-05	-0.0982519	0.000391939	-0.0960699	6.10414e-11	-0.0944108	4.02729e-06																	-0.0876347	1.61831e-05
2510017J16Rik															0.033852	5.82107e-06	0.0358067	0.00896213	0.0417879	6.14962e-10	0.0377924	4.16532e-07			0.0397083	0.00392948													0.0409353	6.6785e-08
2510039O18Rik													0.0599256	0.00120771	0.0396623	0.00127104	0.0738458	0.00080563	0.044923	0.000497327																			0.0508674	0.00901952
2610001J05Rik																																							-0.057148	0.00928854
2610044O15Rik8															-0.0523768	2.34716e-06					-0.0303337	0.00547885
2610507B11Rik													0.0666587	0.0046414
2610524H06Rik													-0.0940858	5.34872e-06					-0.0572681	0.00107581
2700038G22Rik																					-0.0516166	6.30196e-05
2700062C07Rik													0.000477615	0.00606714					-0.0265227	0.0046359
2810001G20Rik																			-0.0398869	1.08321e-05	-0.0396409	0.0025633																	-0.0389648	0.000793232
2810004N23Rik													-0.0790518	0.00188359					-0.0792479	1.90805e-06	-0.0765219	8.35965e-05																	-0.0860258	3.80222e-05
2810006K23Rik													-0.0836392	1.01034e-07	-0.0795112	9.29272e-08	-0.0668854	0.00367487	-0.0658366	6.31236e-08	-0.0375413	0.00854851																	-0.0429962	0.00465616
2810403A07Rik															-0.0332058	0.000120374					0.0744637	0.000165042
2810474O19Rik					0.0292626	0.00647826							-0.0277827	0.00585849	-0.0590306	0.00306973			-0.0568714	0.00376584	-0.0937063	0.000175819																	-0.0724924	0.0042073
2900026A02Rik					0.139656	0.00148217							0.0558234	0.00174016	0.0661684	7.21181e-06	0.0440361	0.00701678	0.0456683	5.41125e-05	0.110257	1.95395e-14			0.078331	0.00202288			0.105732	0.00281491									0.0995776	5.51001e-12
2900060B14Rik																					-0.017569	0.00503354
2900076A07Rik																			-0.0173323	3.63313e-05	-0.0199231	0.00897978																	-0.0183083	0.00857718
2900097C17Rik													0.115592	0.00019905	0.0624127	0.0011858			0.0593141	0.00106298	0.0816428	3.70535e-06																	0.0813934	0.000194092
3110002H16Rik																	-0.0545233	0.00296151
3110009E18Rik																					-0.043738	7.30933e-06																	-0.037219	6.88853e-05
3110062M04Rik													-0.0659981	0.00125066			-0.113237	7.7662e-08	-0.0870327	8.03092e-15	-0.0750517	2.14605e-09																	-0.0717478	3.54684e-08
3830406C13Rik																			-0.0775205	5.98914e-09	-0.083256	2.79566e-06																	-0.0703564	0.000113796
4632404H12Rik																					-0.0289706	0.000343189
4632415L05Rik																					-0.0574218	1.32201e-06																	-0.0523183	2.31534e-05
4833407H14Rik																			0.0225678	0.00142778
4833420G17Rik															-0.0781241	0.000114819
4833439L19Rik																			0.0440818	8.03465e-06																			0.0352378	0.00597822
4921524J17Rik																	-0.0867866	0.000243259
4930430F08Rik													-0.0399311	0.00381456					-0.0282958	0.000476647	-0.0292215	0.00879163																	-0.035764	0.00141023
4930453N24Rik																			-0.0477191	0.00263809	-0.0577125	0.0054577																	-0.0508832	0.00873827
4930481A15Rik													-0.0709144	8.39034e-06	-0.0672143	8.02582e-10	-0.0441448	0.00814927	-0.0332401	4.9964e-05	-0.0353654	0.00136841																	-0.0546229	2.52521e-07
4930503L19Rik													0.0402811	0.0048932					-0.0237246	0.00320371
4930515G01Rik																			0.022643	0.00864577
4930519L02Rik													-0.0401683	1.34791e-06					-0.141739	1.8542e-18
4930555A03Rik															-0.0549956	2.16988e-08	-0.0498483	0.000287938	-0.0305642	3.27979e-05	-0.0589662	2.95682e-09																	-0.0502527	2.75943e-07
4931406C07Rik															-0.0602271	0.00131328			-0.0250639	0.00196654	-0.0689279	0.000135044																	-0.0532888	0.0054875
4931406P16Rik													0.100933	3.11227e-07	0.0305283	0.000311705	0.0731354	0.000279768
4931428F04Rik													-0.0209458	0.00854586
4932438A13Rik													0.122332	8.54215e-07							0.057928	0.00261635
4933434E20Rik																	-0.102113	0.00033673	-0.053808	0.000288771	-0.0984796	9.576e-07																	-0.0809431	0.000117171
5031439G07Rik																			0.0464115	5.28428e-08
5033406O09Rik													-0.188768	3.77253e-14	-0.119733	1.93036e-11	-0.100923	0.000224069	-0.104881	1.44117e-14																			-0.0905245	4.92221e-07
5430403G16Rik																					-0.0384798	0.000291988
5430427O19Rik															-0.034742	0.00305753			-0.052012	2.10445e-07	-0.104947	6.15812e-13							-0.191618	9.25588e-09									-0.0763456	3.64606e-09
5730455P16Rik															0.053613	0.00036757			0.0539505	2.36712e-05	0.0767515	9.17677e-07																	0.0709002	1.0422e-06
5830454E08Rik																			-0.017502	0.000487459			0.0396292	0.00859431
5930430L01Rik													-0.030862	0.0051677
6030458C11Rik																			-0.0350065	0.000313459	-0.0680241	5.28496e-08																	-0.0430918	0.000709477
6330418K02Rik															-0.0326054	0.000166934			-0.0245466	0.000446386	-0.0556342	8.39521e-10							-0.0587157	0.00241404									-0.0428882	1.15039e-07
6330562C20Rik																			-0.0267234	0.0019768	-0.0339393	0.000484392																	-0.0310067	0.000548776
6720489N17Rik																			-0.0251026	0.00022021	-0.036262	1.35344e-05			-0.0675178	0.00960053													-0.0265847	0.000619562
9030624J02Rik													0.0563717	0.00622874
9130008F23Rik					0.118992	0.00328155							0.0607207	8.77328e-05
9130023H24Rik																			-0.0150629	0.00222704
9130604C24Rik																			-0.0174065	0.0066337
9530068E07Rik	0.222369	0.00610802			0.213195	0.00148969							0.161672	4.38921e-10	0.0710752	0.0014127	0.0846496	0.00308603	0.0683099	1.81743e-05	0.127171	1.0104e-09																	0.10695	5.55953e-07
9530082P21Rik															-0.0285947	0.00010303	-0.0329886	0.00191266																					-0.0211958	0.00110236
9930012K11Rik																					-0.0234915	0.000363138																	-0.0283554	6.7918e-06
9930111J21Rik2															-0.101066	1.23728e-14			-0.0356486	0.000485933	-0.19723	6.11446e-38			-0.103636	2.38842e-05			-0.158313	1.02249e-05									-0.147461	1.15378e-27
A430005L14Rik													-0.103034	1.50106e-07					-0.056522	3.33507e-05	-0.0710151	0.00111358
A430033K04Rik																							0.125125	0.00102292
A430046D13Rik													-0.052657	8.94631e-05	-0.0716699	2.12185e-09	-0.0511248	0.00135231	-0.0493991	4.68802e-07	-0.0978248	5.91168e-14							-0.134139	1.56153e-05									-0.0825818	2.28106e-11
A530017D24Rik																			0.0365225	7.61131e-10
A530032D15Rik															-0.0138352	0.00844312
A630072M18Rik															0.0736121	0.00153803
A630089N07Rik													-0.0507762	1.44952e-05					-0.0397665	0.000383249	-0.130126	1.06763e-18			-0.153555	1.41004e-05													-0.0925224	3.1762e-11
AA467197															0.0654043	1.66727e-25					0.0720851	1.74797e-16							0.0636567	0.000803726									0.0694842	4.58523e-18
AC149090.1													-0.116326	0.00106091	-0.276879	6.74826e-40	-0.240053	3.46664e-18	-0.230682	4.99016e-44	-0.366304	1.41592e-58			-0.372142	7.46286e-15			-0.262598	6.68001e-07									-0.299754	2.31807e-43
AC160336.1					0.313561	5.64864e-06							0.273945	1.50803e-18
AI314180																			0.0203771	0.00455389
AI467606													-0.0796686	0.000748769	-0.14407	1.12328e-18	-0.094199	6.19623e-05	-0.107455	2.43357e-16	-0.129889	4.69898e-13			-0.0851162	0.00407457			-0.159148	0.00105644									-0.110222	4.45086e-10
AI480526																					-0.0789333	4.7437e-10																	-0.0523979	6.47069e-05
AI504432																			-0.0571773	1.78375e-06	-0.0823813	2.37382e-07			-0.103388	0.00257425													-0.0640301	2.42218e-05
AI987944															-0.0677669	7.90409e-08			-0.0576155	7.47223e-11	-0.0605835	1.66739e-06							-0.0810066	0.00302513									-0.0520787	3.86673e-05
AU020206													-0.0900193	4.81813e-06
AU022252																	-0.0298886	0.00124644	-0.0393137	1.32243e-07
AW112010															-0.100143	8.8119e-07	-0.167218	1.41944e-07	-0.0930372	3.35464e-07	-0.124944	1.07359e-07																	-0.121423	2.35791e-07
AW146154													-0.0383956	0.00181579	-0.0539335	4.23956e-09	-0.0525619	9.34361e-06	-0.0336145	1.8929e-07	-0.0425228	6.11172e-06																	-0.043407	2.92228e-06
AY036118													-0.0705746	0.000183893	-0.127123	7.72184e-27	-0.138363	1.30912e-16	-0.111753	1.3357e-26	-0.147733	2.24401e-28			-0.17155	7.25538e-11	-0.165816	0.000730273	-0.153437	1.84689e-05									-0.155152	1.76364e-33
Aaas																			-0.0456375	0.00115683	0.0490392	0.000143006																	0.0402123	0.00945532
Aaed1															-0.0568159	0.00548839
Aamdc													-0.078778	9.25946e-05			-0.0846872	0.000886357
Aamp													-0.10088	0.00526845
Aar2															-0.0373244	0.00364079			-0.0329935	0.00118889
Aars2																			0.0221123	0.00820698	0.0303499	0.000555852
Aatf																					-0.0781239	0.000344455
Abca2																					0.0343761	0.000237292																	0.0189376	0.0022464
Abca3																													0.0782779	0.000526275
Abca5													0.0464608	0.000143319
Abcb10																					0.0278365	0.00182564																	0.0325179	0.00113929
Abcb4																			-0.0287297	0.000173866
Abcb6																			-0.0175183	0.00120829
Abcc4																			0.0180854	0.00155096			-0.0296635	0.00106041
Abcc5															-0.0396378	0.00043579
Abcd3															0.0454536	0.00190362			0.0583133	1.97986e-08
Abcf1													-0.0844441	0.00499228					-0.0529933	0.00901653
Abcf2																					-0.05714	0.00500748
Abcf3																			-0.0397088	0.00051211	-0.0600623	0.000107987																	-0.0528708	0.000449295
Abcg1															-0.0829877	7.79152e-06	-0.106345	6.43807e-06
Abcg2															-0.0670303	0.00365049			-0.123903	9.92507e-17																			-0.0564585	0.00765343
Abcg3													-0.0989002	8.89663e-08	-0.0666421	1.3588e-17	-0.0841584	2.2296e-10																					-0.0323645	5.07459e-09
Abhd10													-0.0525596	0.000183349					-0.0644969	3.90517e-10	-0.0499043	0.000672853																	-0.0600169	2.13053e-06
Abhd11													-0.0922303	3.14513e-07	-0.0533704	0.00308423	-0.0712736	0.00543987	-0.0548022	0.000211694
Abhd12																			0.0258803	0.00992632
Abhd14a													-0.0802954	0.000858052
Abhd14b															-0.0504535	0.00348922	-0.0641982	0.00537839	-0.0365011	0.00141069	-0.0611285	0.000140596																	-0.0541221	0.00151915
Abhd17a															0.0923546	5.92141e-06	0.077042	0.00337202
Abhd17b	0.376193	2.44722e-19			0.328053	2.66007e-24							0.28221	1.12484e-50	0.404593	1.89342e-110	0.298976	6.1987e-48	0.373148	7.13351e-122	0.471844	1.74148e-91	0.429197	0.000763552	0.323955	2.84493e-16	0.344564	4.00222e-08	0.530299	1.07588e-24									0.45427	3.87944e-91
Abhd17c															0.0473896	0.0022327	0.059813	0.00421624
Abhd18															0.0384848	0.00068721
Abhd4															0.0609083	0.000405622			0.0525653	6.3563e-05	0.0782434	3.937e-07																	0.0649847	9.84915e-05
Abhd6													-0.0383208	0.000132967	-0.022099	0.00820843
Abhd8																			-0.0547672	0.000333603	-0.0747261	7.68774e-05
Abi1													0.0534628	0.000218822			0.0517466	0.000427787	0.0385952	0.00485052
Abi2															0.0646575	2.5337e-05	0.0760621	0.000774951	0.0254792	0.00388598
Abi3															0.0585721	4.54618e-06			0.0354427	1.88748e-05
Abl1																	0.0753882	0.000422395	0.0552196	3.79981e-05	0.0508055	0.00728751
Ablim1	0.281065	2.62557e-17			0.28545	1.88352e-10							0.41197	9.56571e-88	0.136613	5.03578e-18	0.17156	1.36644e-22	0.101165	4.46856e-21	0.13497	1.8809e-13					0.305917	1.08944e-07											0.13127	2.73936e-13
Abr																			0.0348206	0.00370873	0.0626312	0.000193775			0.0844757	0.00490929													0.056891	0.000449821
Abracl													-0.223108	2.21165e-13					-0.0826875	2.11409e-07
Abraxas1																					-0.0436196	0.00950348
Abt1																					0.0568216	0.000388218
Abtb1													-0.0334917	0.00785112			-0.0536489	0.000859276
Acaa1a																	-0.104099	4.31507e-06	-0.0529147	0.000232358
Acaa2													-0.0955259	2.84028e-05					-0.0739273	6.83032e-06
Acadl													-0.0898331	0.00287633					-0.077662	1.88387e-05
Acads													-0.0990221	5.90101e-07					-0.0550875	0.0019186
Acadsb													0.0636537	0.000260901
Acadvl																			-0.0355877	0.00787626
Acap1																					0.0947243	4.21294e-05							0.17489	0.00356627									0.0733623	0.00360847
Acap2																			0.0387607	0.00520649
Acat1													-0.118057	1.14468e-08					-0.0723654	4.36772e-07
Acat2													-0.0590149	0.000689227					-0.0702653	2.48743e-10	-0.0588095	7.79468e-05																	-0.0427414	0.00765563
Acbd3													0.0747981	0.0001872
Acbd4																			0.0160413	0.00604333
Acbd6																			-0.0111363	0.000932321
Acer2	0.0965923	0.00101865			0.158805	1.37151e-10							0.198203	1.27409e-49	0.0376748	8.92784e-07	0.060378	2.79658e-07
Acin1															0.065731	0.00467361
Acly															0.0677488	0.000750032	0.0849782	0.00384635	0.0679985	6.48128e-05	0.109686	8.71295e-08																	0.0958379	6.89548e-06
Aco1																					0.0333493	0.00781684
Aco2															0.0690196	0.00447092
Acot1													-0.104786	1.42582e-06	-0.133543	3.89484e-13			-0.0348778	0.00232383	-0.0526429	0.000433975																	-0.0639112	0.000263581
Acot13													-0.0958617	2.62249e-06
Acot8															-0.0486308	0.00113915
Acox3																																							0.0367859	0.00690187
Acp1													-0.0997374	0.000245513
Acp6													-0.0561961	0.0069475			-0.0668693	0.0054645
Acrbp															-0.0276262	0.000292748
Acsf2																			0.0181454	0.00362888
Acsf3																																							0.0336512	0.00556931
Acsl1																			0.03981	0.000333603	0.0552717	0.00144759
Acsl3															0.0978604	5.80841e-09	0.0247083	0.00172956			0.0661852	0.000299607																	0.0666994	0.000184062
Acsl4													0.0587366	4.4321e-05			0.0451145	0.00454702	0.0407085	4.28819e-06
Acsl5													-0.0111346	0.00538568
Acss1																			0.0240202	0.00378274
Actb															-0.125263	5.85457e-22	-0.0595087	0.00750714	-0.0846994	1.82603e-12	-0.126447	4.62052e-19			-0.118688	7.83686e-05			-0.13736	0.000107975									-0.0984084	2.66048e-11
Actg1													0.153445	5.20375e-09	0.0548276	0.000160871	0.171142	1.29395e-15	0.129258	1.75931e-17	0.136168	9.32251e-18							0.118892	0.00399016									0.126008	7.83746e-15
Actl6a													-0.100983	1.35009e-05
Actn4															0.0425157	0.000394333					0.089973	0.00014007			0.141491	0.00422781													0.0927182	5.37573e-05
Actr1b																					0.0538135	0.00158154																	0.0479377	0.00641366
Actr2													0.136599	8.39034e-06			0.0663962	0.00960594
Actr3																	0.0850865	0.00297358
Actr5																					0.0415633	0.00797468																	0.0361465	0.00734639
Actr6													-0.055654	6.43745e-05	-0.0667919	6.25957e-09	-0.0735764	1.40383e-06	-0.073662	1.8534e-16	-0.0553214	0.000106766							-0.0924175	0.00926591									-0.0718746	1.98782e-08
Acvr1b															-0.0218803	0.00993429			-0.0382157	1.34165e-07																			-0.0259898	0.00624438
Acvr2a																			0.0203516	0.000104509
Acy1													-0.0271766	0.000729172					-0.021535	0.0021632
Acy3																			-0.0191952	0.00173285
Acyp1																			-0.0570749	1.8945e-05
Acyp2																			-0.0217633	0.00705722
Ada													-0.0412492	0.000808916							-0.0477394	0.00853771
Adam9															0.0198302	0.00260036	0.0308956	0.00884332	0.0183244	0.00340031	0.0264557	0.00219749							0.0393121	0.00740713									0.0216764	0.00291502
Adamts10															-0.040005	0.008826			-0.0321532	0.000669699	-0.0897326	5.7126e-10			-0.0772138	0.00746107													-0.0621342	2.84242e-06
Adat1																			-0.0237294	0.000789392	-0.0341094	0.00046925
Adat2																			-0.0271689	0.00971022
Adck2													0.0381648	0.00157449	-0.0463688	5.35764e-07			-0.0213773	0.00284605	-0.0219107	0.00852156
Adck5													-0.0237714	0.00890529
Adcy6			0.0247	0.000664412
Adcy7																					-0.0892144	8.34594e-06																	-0.0710179	0.000579333
Adcy9																			-0.0268167	0.000459882
Adgre5															-0.0339919	0.00584669	-0.0610671	0.000117512																					-0.031189	0.00398462
Adgrg1															-0.111765	3.86177e-08	-0.15572	5.30033e-10	-0.12477	3.06108e-12																			-0.113589	1.38095e-05
Adgrg3																			0.143723	1.60786e-21
Adgrl2																			-0.0533276	1.42584e-05
Adgrl4																					-0.091777	0.000541496
Adh5					-0.243017	0.00256483							-0.222513	1.92441e-13					-0.0865962	4.15823e-08
Adi1															0.0516288	0.00640714			0.0625385	2.14716e-06	0.0867306	2.35323e-07																	0.0770277	1.22613e-05
Adipor1													0.148381	1.29558e-06	0.0840949	1.1903e-05			0.0919562	1.81113e-08	0.094204	1.54134e-05																	0.0915999	4.82936e-05
Adipor2																					-0.0828588	0.000541375																	-0.0681917	0.00667393
Adk															0.0739879	1.57995e-05
Ado																					-0.0762361	8.39947e-07			-0.110136	0.00148998													-0.0561485	0.000621063
Adpgk															-0.0383896	0.00238027
Adprh																					0.00960831	0.00414992
Adprhl2															-0.0545463	0.00444302			-0.0713737	1.41599e-07	-0.0782823	8.31317e-05			-0.118301	0.00704262													-0.0772653	4.33806e-05
Adprm															-0.0487215	2.61661e-06			-0.0450477	8.53065e-07	-0.0328903	0.00555743																	-0.0513814	1.91514e-06
Adrb2															-0.111191	5.59369e-12			-0.031651	0.00112472																			-0.0358914	0.00207759
Adrm1															0.0605214	0.00372794	0.123061	1.0618e-05
Adsl													-0.099411	1.89659e-08
Adss																					-0.0605004	0.00837826
Adssl1					0.0015995	0.00253807													0.0765837	1.97622e-06	0.0634128	0.00567042
Aebp2													0.0888647	0.000117512	0.0891533	3.0844e-07	0.0860134	0.000801558	0.0691725	3.58905e-06	0.0516108	0.00116283					0.223264	0.000258502											0.0618797	0.00273107
Aen																			-0.0754326	9.51576e-08	-0.0780485	0.000136396																	-0.0607864	0.00447512
Afap1l1					0.19319	0.00938989							0.200754	6.76217e-12	0.112798	5.85325e-08			0.0775145	8.88691e-09	0.080644	4.92417e-05																	0.0821928	6.47072e-05
Afdn													0.0554898	0.0059592	0.0534784	0.000127802
Aff1																	0.053935	0.00143797
Aff3															0.0694715	0.000945446			0.0591077	0.000130592	0.0782275	0.00152444
Aff4					0.286209	0.000172254							0.226682	1.31487e-16	0.134214	1.61271e-12	0.0964072	0.00024745	0.139388	2.3708e-22	0.177929	3.96046e-24			0.14269	9.15541e-05			0.210969	2.34075e-07									0.149813	3.68306e-16
Afg3l1																			0.0444502	0.00367771
Aftph																			0.0806492	7.63176e-09	0.060312	9.62709e-05																	0.0534643	0.00792082
Agap1																	0.047108	0.00808195
Agap2																			-0.0180196	0.000975672
Agap3															0.0334344	0.00408949
Agbl3																	-0.039221	0.00469762	-0.0325332	6.0922e-05	-0.0403817	0.000363138
Agfg2																					-0.0602563	8.82381e-07																	-0.0541644	3.35441e-06
Ago1													0.0772776	0.00169277	0.127117	2.99905e-16	0.103693	6.1317e-06	0.0819319	4.54268e-10	0.114341	4.82439e-11			0.106702	0.00177244			0.144486	8.0849e-05									0.116135	2.77367e-11
Ago2	0.271169	8.09499e-06			0.368285	1.49924e-14							0.318594	4.51582e-40	0.234578	4.87718e-35	0.279866	2.26793e-35	0.203542	3.42724e-43	0.236889	6.47718e-31			0.190036	5.56147e-06	0.296374	3.21365e-06	0.28121	6.22741e-07									0.247894	4.2965e-35
Ago3	0.191256	7.48296e-06	0.156915	0.00103902	0.279623	2.25074e-14							0.199314	1.07081e-31	0.0662004	2.0105e-09	0.117561	1.11919e-10	0.0746118	6.1805e-17	0.0517177	0.00012126																	0.0707223	5.26027e-08
Ago4													0.0556383	2.05465e-06	0.0383196	0.000200972			0.0298655	1.27123e-05																			0.030188	0.00401302
Agpat2															0.210539	6.47501e-31	0.091668	0.000796569	0.141659	1.942e-18	0.131572	1.50803e-10							0.141424	4.9921e-05									0.147446	1.57784e-13
Agpat4													0.102277	1.4941e-06
Agps																					-0.0483114	0.000606345
Agtpbp1																					0.0382916	0.00102289
Agtrap																	-0.0775468	0.00554703
Ahctf1																																							-0.0569583	0.00118682
Ahcy															0.0328368	0.00228277	0.0605903	0.000174268
Ahcyl1					0.148883	0.00369488									0.0713817	0.00175503			0.0671053	4.65554e-05
Ahcyl2															-0.033547	0.0056045
Ahnak					0.157485	0.0043185							0.133007	1.80486e-10
Ahr													0.131891	9.39914e-11	0.0479321	0.000241451	0.0577273	5.21917e-05	0.0365165	9.05097e-07	0.0511751	1.25739e-10																	0.0475058	1.06181e-05
Ahsa1													-0.109514	4.71696e-05
Ahsa2													-0.0863709	1.44946e-05	-0.0985145	6.87336e-09	-0.121342	3.90549e-07	-0.10753	9.02408e-15	-0.07078	7.31574e-05																	-0.0818863	4.86841e-06
Aida																					-0.0450094	0.00408525
Aifm1													-0.0543406	0.000562373					-0.0674554	2.33696e-06
Aim2															-0.0601771	1.56314e-05	-0.0542941	0.00696435			-0.0811018	7.53775e-08							-0.103555	0.00532692									-0.0688827	3.60027e-06
Aimp2					-0.130016	0.000661037							-0.150237	2.19588e-21	-0.105902	1.27153e-10	-0.176551	3.59465e-13	-0.181123	3.11831e-34	-0.153631	4.90214e-15			-0.138064	0.00790322													-0.137626	4.04089e-13
Aip													-0.139163	3.37404e-09	-0.132191	9.56872e-11	-0.129851	4.53244e-06	-0.120882	1.12401e-15	-0.113541	5.00581e-08			-0.148879	0.00477431													-0.0985483	9.18127e-07
Ak2													-0.213924	2.01247e-11					-0.0584647	1.07045e-05
Ak6													-0.0637974	1.23993e-06					-0.0609063	3.25024e-05	-0.090576	2.29279e-07																	-0.0672492	4.09406e-05
Akap1																			-0.0199381	0.00713169
Akap10															-0.0585426	7.12705e-07					-0.0434648	0.000594633																	-0.0555496	4.33171e-06
Akap11													0.0485173	0.00321825
Akap13	0.305435	3.4067e-08			0.341246	1.62204e-07							0.334053	2.21549e-36	0.485587	6.3482e-124	0.36755	4.00003e-45	0.381959	5.51244e-107	0.420387	2.54012e-87	0.519536	3.37335e-06	0.470697	3.53356e-27	0.220974	0.00318106	0.44225	6.51031e-19									0.4049	1.13119e-82
Akap7					0.108323	0.005067
Akap8															0.0630953	0.000508915	0.131574	3.74314e-06	0.0774181	1.08288e-05	0.0671701	0.00559612																	0.069107	0.00491455
Akap8l													0.0762599	0.00955455
Akap9															-0.075398	0.00415173			-0.0906856	6.70185e-07	-0.092393	0.00021939																	-0.0804112	0.00203923
Akip1													-0.065528	4.96624e-07					-0.0416812	0.000915071
Akirin1													0.0766566	0.000250702							0.0575923	0.001875
Akirin2													-0.105614	0.000330436	-0.110729	5.25235e-08	-0.13913	6.20298e-07	-0.144136	1.17044e-21	-0.0774233	0.000782993							-0.340891	4.76596e-09									-0.103894	1.33151e-06
Akna															0.0397296	0.00181839			0.0294598	0.000494764																			0.0473533	0.00688975
Akr1a1																			0.0636664	0.00012651	0.0752971	0.000553841
Akr1b3													-0.117952	3.60333e-05					-0.0882583	1.27393e-06
Akr1c12																			-0.018447	0.00785918	-0.0235177	0.00602889
Akr1c13													-0.103279	4.29571e-09	-0.0789402	1.04579e-05			-0.0987863	6.50198e-13	-0.0630919	0.00043217																	-0.0615182	0.00176582
Akr1e1													-0.0558503	0.000827945			-0.0745951	0.00585817	-0.0671672	5.28472e-07
Akr7a5													-0.0797406	8.00685e-06					-0.0642894	7.79082e-06
Akt1													0.100856	0.00768595	0.0969064	1.01341e-05	0.109994	1.60628e-05	0.094601	3.37518e-08																			0.0810322	0.000767047
Akt2													0.056923	0.00381414							0.052835	0.0042397
Aktip													-0.0481667	0.000349959	-0.0534568	3.05791e-06					-0.0372547	6.40668e-05			-0.064228	0.00351621													-0.0401757	0.000184811
Alad													-0.124084	3.5882e-13			-0.105922	0.000536071	-0.0889905	2.44413e-07
Alas1													-0.0412355	0.00116456	-0.0545164	0.000480312			-0.0379702	6.13859e-07	-0.0849637	3.75089e-08							-0.119014	0.00043697									-0.0627702	8.32999e-05
Alcam													0.0972678	0.000113873					0.0634666	4.30016e-07
Aldh18a1													-0.0376792	0.00183289
Aldh1a1													-0.0696972	0.000455181
Aldh2															-0.0594875	0.00109249	-0.0708964	0.00577057
Aldh3a2			-0.0110121	0.00683222
Aldh6a1													0.0403788	0.00294229
Aldoa															-0.159886	1.66825e-11			-0.0888609	0.000175978																			-0.0946475	0.000808028
Aldoc																	-0.053261	0.000508438	-0.0158736	0.00601577
Alg11																																							-0.0307711	0.00187222
Alg14																	-0.0496792	0.00550815
Alg2																					-0.0665777	5.22134e-06																	-0.0532451	0.000447048
Alg3													-0.0258102	0.00944704	-0.0388086	0.000492035	-0.0478657	0.00779493	-0.0642565	1.10834e-09	-0.0635147	2.60171e-07																	-0.0550817	4.33105e-06
Alg5															0.0724805	0.000359516			0.0493974	0.00434525
Alg8													-0.0254112	0.00162671					-0.0556967	2.65221e-07
Alkbh1															0.0401969	0.00896327	0.124258	1.60853e-05	0.0774515	6.55887e-06	0.0965378	1.96263e-05																	0.0865624	0.000246458
Alkbh2													-0.0286259	0.00406385	-0.0296951	0.00588867			-0.0298487	0.000151871
Alkbh5																	0.00109855	0.00131531
Alkbh7													-0.0836642	1.937e-09	-0.0933734	4.176e-13	-0.0882827	3.35465e-06	-0.0878997	3.57757e-14	-0.0597228	0.000419901																	-0.0710401	4.22166e-06
Alkbh8																					-0.0427995	0.00192026																	-0.0436165	0.00368455
Alox5ap																			0.131291	8.75309e-15	0.0714907	0.00495377
Alyref															0.148525	1.20112e-12	0.233136	1.22069e-16	0.067492	0.000168294	0.102396	6.06178e-06			0.124757	0.00778874													0.125677	9.94491e-09
Alyref2																			-0.0150011	0.00365826
Amacr													-0.0340638	0.00216467	-0.0228704	0.0089156			-0.0177401	0.00259804
Ambra1													0.0172626	0.00211985
Amd1																			-0.0649579	2.96695e-06	-0.0541236	0.00591832
Amd2															-0.0355994	5.19095e-07	-0.0354079	0.00020606	-0.0431675	1.90106e-12	-0.0512108	2.01262e-09	-0.00486796	0.0083266	-0.0537649	0.00236055			-0.0579998	0.00270699									-0.0470221	2.26938e-09
Amdhd2													-0.0491445	0.000501501
Amfr					0.16903	0.00960075							0.15573	1.70678e-11	0.090579	1.18997e-06	0.108372	3.27856e-11	0.0922829	3.90369e-11	0.114181	6.08946e-11							0.151465	0.000724678									0.108759	2.13562e-09
Ammecr1l																			-0.0345269	0.00220369
Amn1													0.07468	7.46621e-05
Ampd2													-0.0907571	0.000280555
Amz2																			0.0374807	0.00635042	0.0516162	0.000110962
Anapc1															0.0732803	0.000122422	0.0999513	3.7529e-05	0.0805764	9.20764e-08	0.0722962	0.00115966			0.132143	0.000175984													0.0743535	0.000418178
Anapc10																			-0.0533848	5.54482e-05
Anapc11													-0.082744	0.000123185	-0.0994836	1.09976e-05			-0.133668	1.2792e-16	-0.140359	1.52755e-10			-0.173532	6.27298e-05													-0.130035	6.33671e-09
Anapc13																			0.00776334	0.00192246
Anapc4													-0.0626214	0.0011696			-0.0877713	0.00012022	-0.0592465	8.27953e-06	-0.0756431	4.38221e-06																	-0.0872884	4.42313e-08
Anapc5															0.0985326	4.89014e-07	0.197777	1.1768e-14	0.0465376	0.00380652
Anapc7																			-0.0562394	0.000263497	-0.0639311	0.00318996																	-0.0577261	0.00861783
Angpt1																			-0.105468	2.28689e-06
Angptl4					0.0467644	8.44771e-09							-0.00588322	2.70303e-07					-0.0369349	1.58943e-05	-0.0563948	2.79566e-06																	-0.0461221	3.20989e-05
Ank															0.0431365	0.000135076
Ankib1															0.0293715	0.00094754	0.0789204	0.000148966
Ankle1																													-0.120841	0.0079623
Ankmy2													-0.07189	1.68325e-05	-0.0564947	5.60856e-05	-0.0872678	7.82516e-06	-0.0435862	4.27815e-07	-0.0728358	7.90722e-08																	-0.0727318	1.66756e-07
Ankrd10													-0.110609	7.62302e-05	-0.0753255	0.00464733			-0.0717857	4.86826e-05	-0.0847993	2.98336e-05					-0.148595	0.00105372											-0.0880013	0.000317866
Ankrd11					0.304879	0.000250798							0.230164	1.21249e-11	0.265505	1.83116e-41	0.245176	2.73377e-24	0.280384	7.22261e-68	0.264398	2.26618e-38			0.272946	2.42874e-08			0.241911	9.89642e-07									0.264322	1.89618e-40
Ankrd12													0.137775	1.5152e-05
Ankrd13a	0.325107	6.98666e-05											0.20767	2.15777e-10	0.156162	3.12193e-14	0.163662	5.35238e-11	0.139211	4.93088e-17	0.140238	4.26749e-11							0.190515	0.000932263									0.105796	8.65633e-07
Ankrd13b													-0.0210776	0.00458967
Ankrd13c													0.0525294	0.000455425									0.0256441	0.00094938
Ankrd16																					-0.0164682	0.000721672																	-0.0196087	0.00928647
Ankrd17																	0.0869361	0.00993654			0.0616146	0.00408525
Ankrd24													-0.0662844	9.79551e-06	-0.0473349	3.00052e-07	-0.0461649	0.00129977	-0.0580501	5.70663e-16	-0.0603447	4.80755e-11							-0.0679916	0.000215265									-0.0555206	5.61872e-09
Ankrd26																			-0.054575	4.43238e-07	-0.0453472	0.00518944
Ankrd33b	0.152375	0.00102753			0.118987	0.00101953							0.141951	7.04529e-17	0.11148	6.30965e-22			0.047816	8.18448e-14	0.0929138	5.87771e-25							0.09605	0.000380802									0.081013	3.82353e-15
Ankrd44																			0.0641663	3.12765e-06
Ankrd49																			-0.0398466	0.00599328	-0.0632724	0.00149431
Ankrd54													-0.0621514	0.000143195	-0.049763	0.00303933	-0.0665576	0.000574907	-0.0849832	3.36746e-10	-0.0879543	9.61688e-07																	-0.0779439	1.33356e-05
Ankrd9																					0.03854	0.000810202
Anks1	0.889676	3.94234e-59	0.74427	1.10096e-12	0.783907	5.6681e-56							0.834852	7.91552e-257	0.4962	8.5974e-151	0.598587	5.36991e-153	0.43958	7.32276e-189	0.381731	3.66211e-83			0.465087	5.78043e-31	0.565998	5.52583e-26	0.375243	3.51061e-16									0.425551	1.17956e-101
Ankzf1													-0.0355263	0.00532584
Anln																			-0.0619262	1.43889e-10	-0.0736104	5.54079e-10							-0.309459	8.14618e-14									-0.0440576	1.1573e-05
Ano6													0.0594153	4.31027e-05	0.0467219	0.000112738					0.0297713	0.000665559																	0.0317594	0.00411139
Anp32a																					-0.0525325	0.00133017			-0.132565	0.00189889
Anp32b													-0.18943	1.63856e-15			0.0736493	5.81314e-05	-0.0612807	2.56827e-05	-0.0853069	6.36391e-07
Anp32e															0.17121	1.40685e-15	0.23546	1.21209e-19	0.10137	4.99311e-11	0.103021	3.37233e-06			0.207121	0.00281785													0.144281	9.70225e-10
Antxr2	0.0253022	0.00853693											0.0451968	0.000210624	0.0785294	1.40707e-13	0.0679774	7.55129e-07	0.0743953	1.35393e-18	0.0770748	2.32233e-11																	0.0715356	5.27889e-11
Anxa1													-0.0882923	0.00195297	-0.0684164	0.00118888			0.0913512	2.75726e-07
Anxa2																			0.0854706	3.35826e-06
Anxa3																			0.0586589	4.77532e-14
Anxa5															-0.0923306	0.000201908
Anxa6													0.101741	7.87002e-06					0.085546	8.91219e-09	0.052148	0.000267459
Anxa7													0.103262	0.00153758
Ap1b1													0.0492682	0.00526845							0.0496963	0.000287258
Ap1m1																					0.0785435	0.00038608
Ap1s1													-0.0865296	0.00143432					-0.0730511	6.88953e-06
Ap1s3																					-0.0356154	0.00504368
Ap2a2															0.0960734	5.68549e-10			0.064444	5.19726e-07	0.214524	3.78274e-36			0.145552	0.00026323			0.183924	4.55704e-06									0.162918	5.84211e-23
Ap2b1															0.055486	0.00270106					0.074616	3.86062e-05																	0.0831413	6.2184e-07
Ap2m1															0.0725784	0.00381588	0.105761	7.42399e-05	0.052398	0.0014721
Ap2s1													-0.211869	1.93491e-14
Ap3b1													0.112366	0.000248655
Ap3s1																	0.0836866	3.14943e-05	0.1645	2.98391e-25	0.0683406	0.000216671																	0.0759949	3.35441e-06
Ap4b1																			-0.0290602	0.000259357
Ap4m1															-0.064313	9.40111e-05					-0.0664774	0.000362254																	-0.0644038	0.000375997
Ap4s1																			-0.0507971	0.00241263
Ap5s1													-0.0280057	0.00147777			-0.0344793	0.00214399
Ap5z1																			-0.0262776	3.71519e-05
Apaf1															0.0475441	2.92999e-06	0.0542146	2.83501e-05	0.0784979	1.84377e-18	0.08609	2.95886e-13			0.122029	3.83435e-08													0.0675069	2.8705e-09
Apbb1													-0.0340846	0.00808282			-0.0300115	0.00123938
Apbb1ip															-0.0912876	4.8581e-06
Apbb2															0.0887791	4.96496e-19	0.0329616	0.00406686	0.0253421	0.00107463	0.0522141	3.85578e-06																	0.0632803	5.9222e-09
Apc																			0.0372922	0.000554265
Apeh													-0.0585459	0.00206825					-0.0403033	0.00266446
Apex1					-0.213674	0.000568771							-0.211433	4.58128e-15			-0.104707	0.000770309	-0.181725	3.23306e-26	-0.142277	1.05885e-09																	-0.128137	5.32016e-08
Apex2																			-0.0239769	0.00190583	-0.0416338	8.21539e-05																	-0.0366867	0.000765185
Aph1a																	0.00937364	0.00518777	0.0643365	6.41419e-05
Api5															0.0972915	1.13119e-08			0.090392	1.45916e-08	0.0845912	7.4312e-05			0.146426	0.000885214													0.0854281	7.90104e-05
Apip													-0.0859832	4.70031e-07			-0.127907	2.83626e-07	-0.103263	3.21686e-12	-0.0743195	8.2279e-06							-0.0656302	0.00152744									-0.0730462	9.41757e-06
Aplf																			-0.0268485	0.00211939
Aplp2													0.128048	3.47096e-05							0.149783	3.89129e-15			0.138349	0.00323198			0.151674	0.00215628									0.0934918	7.67732e-06
Apobec3																	0.108873	0.00353593	0.105866	1.77879e-07
Apobr																			0.0376734	0.000246263
Apoe	-0.503868	2.32902e-05											-0.196514	8.81793e-06	-0.187353	3.13965e-11	-0.18376	4.28383e-08	-0.450299	6.33811e-33																			-0.108977	0.00380412
Apoo													-0.0283531	0.0059107
Appl1															0.052252	0.00333196
Aprt													-0.169441	5.98041e-07					-0.0416741	3.07709e-06	-0.0890335	0.000193737																	-0.0858233	0.00110413
Aqp1																			-0.0469066	1.32673e-08
Aqp9																					-0.0293604	0.00176087							-0.0585734	0.00930243									-0.023478	0.00950727
Aqr																	0.0490171	4.86514e-05
Arap2																			0.0413032	3.67678e-06	0.0664466	7.25812e-05																	0.0427518	0.00590556
Arcn1													0.100605	0.000481171
Arf1															0.081607	8.70888e-06	0.079978	0.00460294	0.0858462	4.86318e-09	0.116807	2.04219e-10																	0.0997817	5.93851e-08
Arf2					0.0460467	0.00542107							0.0466573	0.00225564
Arf3	0.190673	0.00830016											0.0857122	0.000146317	0.0662705	0.000809357			0.0822315	1.19036e-08																			0.068471	0.000203791
Arf4															-0.103088	1.50559e-06			-0.0814987	4.52549e-06
Arf5																	0.0963426	0.000121276
Arf6															0.0473637	0.00910219	0.0836965	0.00459311	0.0653448	4.18392e-05	0.108381	3.54726e-07							0.185011	0.00329076									0.079196	0.000409002
Arfgap2																			-0.0482546	0.00747466
Arfgef1													0.102494	5.08743e-05	0.0612597	0.00580046	0.0879893	0.00447315
Arfgef2																	0.0357522	0.00828217	0.002631	0.00398269
Arfrp1															-0.0574449	0.00818222			-0.0530659	0.00163208									-0.131324	0.00597183
Arglu1													0.0960116	3.28874e-05	-0.0360553	0.00641438					-0.112476	6.35203e-07																	-0.0724542	0.00344436
Arhgap1																			0.0578327	6.61578e-06
Arhgap10															0.0252522	0.0058563
Arhgap11a																													-0.193423	0.000436267
Arhgap12																					-0.0375831	0.00141665
Arhgap17															-0.178577	2.81853e-19	-0.106833	0.000229822	-0.114982	7.45325e-13	-0.100318	3.55608e-06																	-0.105907	9.76742e-07
Arhgap18																			0.0586571	0.000514802
Arhgap21																			0.0412938	9.31011e-05
Arhgap25															0.0468404	0.00151943			0.0730496	5.13112e-09	0.043339	0.00443175																	0.0494581	0.00667838
Arhgap26																			0.020952	0.00200064
Arhgap27																					-0.0492382	0.000311294																	-0.0429972	0.000644886
Arhgap30															0.100324	7.06985e-05	0.120734	8.79232e-05	0.143908	7.36117e-17
Arhgap31													0.135754	6.17777e-06	0.0633038	0.000582047			0.0680896	3.4698e-09	0.131651	1.16156e-25							0.150286	3.93926e-05									0.0998949	9.7558e-13
Arhgap32															0.0780033	1.81754e-05	0.0812572	5.39759e-05	0.0697614	3.97528e-07	0.0771204	8.5533e-05																	0.0861249	6.86805e-06
Arhgap39																					-0.0300817	0.00278934
Arhgap4																					-0.0567063	0.000335533
Arhgap45																			0.0491516	0.00549005
Arhgap5													0.045404	0.00909125
Arhgap6															-0.0545172	0.000567912			-0.0499893	0.000160502	-0.0420219	0.00160428
Arhgap9													-0.0658527	0.000398906	-0.0611575	0.00227931
Arhgdia													0.0761205	0.00678784	0.063945	0.000552662			0.0967555	1.98787e-10	0.078929	0.000122084																	0.0761732	0.000440619
Arhgdib													-0.14612	8.20099e-05	-0.0745934	8.22795e-05	-0.0982031	0.00164409			-0.108993	9.49043e-09			-0.180715	2.05387e-06													-0.0666859	0.00257811
Arhgef1													0.141876	3.06716e-07	0.0771211	0.000502123	0.0604149	0.00451731	0.0543595	0.000318876
Arhgef12													0.0849227	0.000570792
Arhgef2													-0.116653	0.000158045	-0.0788975	0.000943946
Arhgef3													-0.0662679	2.06193e-06	-0.0563085	2.56592e-06	-0.0443953	0.00192339			-0.0478181	0.00192417																	-0.0520795	0.000124277
Arhgef39																			-0.0377463	0.000239435	-0.0500231	0.000665702							-0.225469	1.75728e-06									-0.0367859	0.00326805
Arid1a																					-0.119269	5.14003e-07																	-0.0850128	0.000973283
Arid2					0.252827	3.78776e-06							0.0972548	6.42247e-05	0.0231857	0.000728238	0.0980745	7.4581e-05	0.0530804	0.00144458
Arid3a																			0.0169495	9.13414e-05
Arid3b															-0.0481385	8.38057e-09
Arid4a					0.279141	0.000324833
Arid4b													0.100041	0.00282865
Arid5a	0.221444	2.29629e-07			0.258213	1.1162e-06							0.19455	8.48276e-26	0.344813	2.64501e-71	0.219777	1.39102e-35	0.30248	3.04016e-100	0.406618	5.63647e-78			0.312541	7.18629e-16	0.300122	2.48126e-05	0.464625	1.40046e-23									0.382056	2.73179e-70
Arid5b															-0.0504226	0.00940754			0.0202179	0.00829261
Arih1													0.0756394	0.00942707
Arih2	0.137799	0.00391082											0.133114	1.02086e-13			0.105319	8.2099e-08	0.0418404	0.000380439	0.0766531	1.10667e-08			0.0830678	0.0044772													0.0551804	9.56907e-05
Arl1													0.113797	0.000210615
Arl11																					-0.099579	3.5834e-09																	-0.0520496	0.00245615
Arl15													0.0323081	0.00166743					0.0237326	0.000145987
Arl16													-0.0358957	0.00409382	-0.0431989	5.55602e-07			-0.044739	5.39728e-09	-0.048266	1.25812e-05																	-0.053655	1.22597e-07
Arl2					-0.140626	0.0018792							-0.0771508	0.000173868					-0.0576599	0.000215541	-0.00970106	7.607e-05																	-0.00478991	0.00334075
Arl2bp													0.100404	0.000450657	0.121508	1.23305e-09	0.125012	3.08096e-06	0.0622358	0.000573289	0.111623	2.17648e-07																	0.105895	7.99834e-07
Arl3													-0.083244	0.000576784
Arl4a					0.184117	2.89251e-05							0.242039	1.16859e-26			0.0913344	0.00251443			0.0663972	0.0012715
Arl4c													-0.0387152	0.001636
Arl6ip1																													-0.255582	8.424e-05
Arl6ip4													-0.11754	2.03422e-06							-0.071155	0.000122305
Arl6ip5													0.10733	0.0012256	-0.0823989	0.00019171			-0.0563281	0.00129888	-0.0864779	6.14125e-05																	-0.0804261	0.000491658
Arl6ip6													-0.0447055	0.00234648							-0.060722	0.00148844																	-0.0491149	0.00506217
Arl8b																					0.0172953	0.00120959
Armc1															-0.0803581	5.86051e-06			-0.0655298	7.11477e-08
Armc3															-0.0501614	0.000159354
Armc5													0.0496634	0.000407383
Armc6															-0.0213962	0.00673486			-0.028065	7.81559e-06
Armc7																			0.0208898	8.38947e-05
Armcx1													-0.0465627	0.00661265	-0.0533867	0.000525062	-0.0640189	0.00347233	-0.0729641	1.08498e-09																			-0.047837	0.00238781
Armcx4																			0.0200075	0.0019768
Armt1																					-0.0470706	0.00575649
Arnt					0.135189	0.00522073							0.0905916	1.52601e-06	0.0724592	6.53205e-07	0.0719105	0.000240364	0.0642709	2.07091e-09	0.12563	1.47276e-17			0.0910391	0.00034824			0.157797	5.21142e-07									0.105638	1.93123e-13
Arntl															-0.0366447	4.21196e-05	-0.0493174	0.0017904	-0.0311552	3.13422e-06	-0.0435134	8.78656e-06			-0.0530797	0.00221039													-0.0476555	9.35676e-07
Arpc1a					0.044362	0.00656558							0.113452	0.000115508			0.125858	6.96987e-06																					0.0728975	0.00244278
Arpc1b																			0.0398053	0.00405098
Arpc2					0.159405	0.001222							0.149324	6.57143e-09	0.0608504	0.00025712	0.114596	2.16333e-07	0.103211	1.40834e-15																			0.045624	0.00744716
Arpc3	0.463342	1.13944e-20	0.655586	2.6118e-08	0.334729	8.51835e-09							0.550492	4.80351e-121	0.399162	2.67987e-134	0.449361	9.47244e-97	0.338206	5.69251e-138	0.343116	1.27556e-91			0.211419	3.5404e-10	0.329956	8.35059e-10	0.397896	1.4261e-28									0.341387	1.39014e-94
Arpc4	0.316643	0.000350572											0.227733	1.86336e-14	-0.0818923	0.000401867	-0.0793049	0.00873459	-0.10969	2.24972e-12	-0.0965569	3.62789e-06																	-0.0787677	0.00026032
Arpc5													0.197513	1.79354e-09															0.144186	0.00921288
Arpc5l																			-0.0999601	1.00393e-08	-0.156192	5.21123e-13																	-0.112518	5.01392e-07
Arpp19															0.110847	1.98978e-06	0.0899142	0.00585817	0.0817029	2.28617e-06	0.101231	1.52411e-05			0.166068	0.00345332													0.101197	1.15984e-05
Arpp21																					-0.0647133	0.00116913
Arrb1													-0.0642487	5.5237e-05
Arrb2																					-0.0196233	0.00155966																	-0.00572171	0.00763548
Arrdc3													0.0804963	0.000122355	0.0838242	1.1112e-07	0.0885498	1.44972e-06	0.0933107	2.43611e-18	0.155264	2.81022e-26			0.0778568	0.00828364			0.188159	2.24774e-06									0.123182	3.07571e-16
Arrdc4					0.154825	0.00299716							0.166584	9.13764e-17	0.134529	1.18067e-22	0.130829	2.06245e-10	0.0996224	1.13896e-25	0.107269	3.14156e-18			0.0804723	0.00539895	0.233432	3.17327e-06											0.117128	2.47733e-20
Arsb															0.0302351	0.00312583			0.0444801	1.54316e-05
Arsk																					-0.0363277	0.00843475
Art4													-0.145166	2.72622e-10			-0.066299	0.000185694	-0.045719	5.71659e-07
Arv1																					-0.0305695	0.000311185
As3mt													-0.105232	1.92318e-07	-0.0608155	0.00523025			-0.0704252	2.43083e-05
Asah1	0.0787178	0.00269679			0.263741	1.17442e-05							0.179995	1.42644e-13																									0.0536495	0.00690998
Asap1																	0.0742559	0.00805804
Asb3															-0.0428969	0.00165239
Asb8													-0.0519828	0.000914668
Asf1a													-0.0772397	0.000775086
Asf1b															0.0412325	0.000900807	0.0922963	0.000271898	-0.0589601	6.0922e-05
Asna1													-0.0475084	0.000953359	-0.0462779	0.00381588			-0.053484	4.30801e-05
Asph					0.269395	4.69676e-07							0.208594	3.45638e-20	0.104484	1.94034e-12	0.0922647	0.000188213			0.0876216	1.11422e-08					0.185311	0.00723664	0.0998616	0.00644561									0.0977771	6.29588e-10
Aspm															0.00654929	0.00153146	0.0101435	0.00397973	-0.0630039	6.15065e-08	-0.0484045	1.03922e-05							-0.397717	1.17465e-11									-0.0271863	2.96284e-06
Aspscr1													-0.0737323	5.73745e-05			-0.110058	2.78757e-05	-0.053608	7.00936e-05
Asrgl1													-0.0973485	5.46025e-07
Aste1																					0.0167561	0.00577218
Asxl1																			0.0389126	0.0069887
Asxl2															0.0626	0.00539888			0.0573277	8.99102e-05	0.0804273	9.10221e-05																	0.0637023	0.0089099
Atad1													0.0769863	0.000497832
Atad2	-0.113643	0.00131755											-0.0940023	2.77523e-12					-0.0835527	4.37354e-05	-0.0793814	0.00146099
Atad2b																					-0.0620983	0.00102482
Atad3a																	0.0929668	0.00242507
Atad5	-0.0678175	1.44105e-05											-0.0538004	2.96265e-14					-0.0596446	6.22985e-05	-0.0818053	3.82438e-05
Atat1															-0.0805967	2.0897e-08			-0.0425859	6.3563e-05	-0.0895106	1.16954e-09																	-0.09016	2.12356e-10
Ate1													0.0661229	0.0025982			0.0400917	0.00785383
Atf3													-0.0636377	0.00334384	-0.0626101	3.34898e-09	-0.0539661	3.56946e-06	-0.0655748	9.68767e-11
Atf4																					0.183731	2.96169e-15																	0.108006	3.74477e-05
Atf5															-0.0351404	0.00100408			-0.0225073	0.00128201
Atf7ip													-0.0947704	0.00163644	-0.0756788	0.000590749	-0.0985264	0.00256804	-0.0837705	6.28176e-07	-0.104022	1.53674e-05							-0.167795	0.00272851									-0.0882872	5.19681e-05
Atg101	-0.151087	0.00219071											-0.141714	7.01514e-16	-0.136713	2.92148e-19	-0.120996	1.24775e-08	-0.136758	2.2004e-26	-0.119036	5.27535e-11							-0.143281	1.18539e-05									-0.128478	3.67436e-14
Atg13																					0.0537105	3.18203e-05																	0.0408748	0.0014105
Atg16l1																			0.0645716	1.17966e-07	0.0724844	5.45693e-06																	0.0603282	0.000193356
Atg2a													0.087992	3.70912e-05	0.0415353	6.1633e-05			0.0515775	3.08798e-08	0.0534301	2.31197e-05																	0.0349051	0.00289982
Atg3													-0.0799936	0.000202643							-0.0895742	3.96513e-05																	-0.0776946	0.000571871
Atg4a															-0.0357026	8.51988e-06			-0.0341226	1.11481e-06	-0.045449	7.3749e-09																	-0.0298929	0.000229082
Atg4c															-0.0225218	0.00312452			-0.0376434	5.04834e-10	-0.0276264	0.0083263
Atg4d																			-0.027035	0.00889202
Atg5													-0.0674825	0.00127409					-0.0778525	1.67406e-08	-0.0335056	0.00413309
Atg7																			0.0398222	0.000500167
Atg9b																					-0.0150732	0.000851298
Atic													-0.15761	2.45282e-09					-0.0719432	1.28234e-07
Atl2													0.0437311	0.000140979	0.0415301	0.000217718					0.0442563	0.00101947
Atl3															0.0388267	0.000450417
Atm													-0.0342806	0.00569359					-0.0411638	0.000782965																			-0.0400547	0.00525372
Atmin													0.0359557	0.00328391	0.0442979	1.42434e-06			0.0265382	0.000460369	0.0423438	0.00079017			0.0649797	0.00330413													0.0423131	0.000363524
Atn1													0.070519	0.000110977	0.0340894	0.000469063			0.04182	0.000126033	0.0563366	7.67387e-05																	0.0457421	0.00265055
Atp10a															0.0421356	0.000141627			0.0525577	1.3232e-09																			0.0390509	0.00371301
Atp11a															0.0255241	0.000547778
Atp11c																			0.0295301	0.00820698
Atp13a2													-0.0948403	6.07894e-05	-0.0541536	0.00546855	-0.100145	0.000466205	-0.079868	2.51614e-06	-0.0648103	8.98879e-05																	-0.059795	0.00375434
Atp13a3													0.0661462	0.00956827					0.0829109	1.77879e-07	0.0532615	0.00402709
Atp1a1					0.165206	0.0015561							0.160932	1.36184e-07	0.12804	1.9864e-09			0.085173	1.09155e-06	0.114119	1.31495e-06																	0.0972416	1.12219e-05
Atp1b1																			0.0393415	1.6748e-08
Atp1b3															0.141347	3.21663e-13	0.118608	2.09615e-05	0.0643347	6.3285e-05	0.147832	9.41838e-11							0.246596	4.25441e-05									0.165618	5.36022e-13
Atp23													-0.0989583	5.54187e-09	-0.0470077	0.00909776			-0.0503497	0.000220834	-0.0665866	3.55566e-05																	-0.0609443	0.000375785
Atp2a2	0.159905	0.00185213											0.12331	4.41132e-10	0.209677	8.31692e-32	0.214731	7.79408e-19	0.180471	2.63496e-31	0.149675	6.17641e-17			0.182962	3.84258e-05	0.260189	0.000209834											0.185535	1.33302e-22
Atp2a3															0.0581653	0.00142007
Atp2b1					0.129847	0.00256354							0.161001	6.10313e-09					0.0525958	0.00542848	0.085223	0.000131813																	0.0816945	0.000278452
Atp2b4															0.0686739	0.00727613	0.0878982	0.00242507	0.138057	4.34347e-16	0.0621567	0.00742006			0.168076	0.00232532													0.0844255	0.000665509
Atp5a1															0.0839773	2.51259e-07	0.0721213	0.00415971	0.0461505	0.00113102	0.0812161	5.55406e-06							0.128366	0.00236032									0.105046	3.232e-10
Atp5b													-0.15671	7.03258e-12					-0.0767739	8.29274e-08
Atp5c1													-0.0950438	0.000919666	0.0526526	0.00661651	0.0864255	0.000146864
Atp5d																			-0.0446515	0.00187212
Atp5e															0.0609419	0.00467174	0.102997	9.20997e-06	0.0389602	0.00195554	0.087464	8.78656e-06																	0.0776888	0.00011664
Atp5f1													-0.0807164	7.61978e-07					-0.0811435	1.27799e-09	-0.0742808	3.7979e-05																	-0.0447746	0.00837425
Atp5g1					-0.275778	0.00357199							-0.243515	1.19348e-19					-0.111897	2.97706e-12	-0.0601791	0.00850251
Atp5g2	-0.172686	0.00631936											-0.156076	4.63058e-14
Atp5g3																	0.115009	2.48359e-05			0.0681832	0.00370946																	0.0690329	0.00230098
Atp5h													-0.229023	2.15862e-17					-0.094944	4.834e-14	-0.0628151	0.00152656																	-0.0563194	0.00394253
Atp5j													-0.112457	1.83782e-05					-0.052741	5.96212e-05	-0.0957395	2.46843e-07	-0.350772	0.00873024															-0.082385	6.19865e-06
Atp5j2													-0.0884335	0.00172122
Atp5k													-0.100847	9.04556e-05	0.11442	1.80677e-11	0.0976674	0.000462359	0.132482	3.74666e-17	0.181499	3.69447e-17			0.205871	7.48253e-06			0.205044	0.000932263									0.159291	7.66275e-15
Atp5l																	0.0666543	0.000700751			0.0735942	0.000226815																	0.0606296	0.00447384
Atp5o-1					-0.306689	7.39476e-05							-0.310225	1.96535e-27	-0.0907847	3.44894e-05	-0.162432	2.64276e-11	-0.159957	1.55031e-31	-0.128763	4.83196e-12			-0.226236	6.69991e-08													-0.112955	4.64062e-10
Atp6ap1													0.0792653	0.0026109
Atp6ap2													0.124817	1.24758e-05					0.058133	3.68557e-06	0.0818068	0.000426707																	0.0701485	0.00492346
Atp6v0a1																	-0.0219604	0.00160508
Atp6v0a2																			-0.0544901	1.50041e-06
Atp6v0b															-0.116368	1.0654e-07			-0.0717054	0.000102197	-0.0985764	1.18018e-05																	-0.0968186	9.9106e-06
Atp6v0d1															0.0691839	0.00150582					0.0899383	1.13922e-05																	0.0590954	0.00637245
Atp6v0e													-0.0991746	0.00811554	-0.129164	4.06896e-10			-0.0693504	3.97117e-06
Atp6v1a													0.0982153	8.8459e-05
Atp6v1b2																			0.0578589	2.28413e-05
Atp6v1c1																			0.0367347	0.00910096
Atp6v1f																			-0.0589108	0.000122884	-0.088842	1.98048e-07																	-0.0627382	0.000170519
Atp6v1g1																			0.0442454	0.0095992
Atp6v1h													0.0682461	0.00767384					0.0482352	0.000327016
Atp8b4																			0.0899078	4.00192e-28
Atpaf1																			-0.0365667	0.00443682
Atpif1	-0.324868	0.00608384											-0.313308	1.17238e-24					-0.137886	1.28172e-19
Atr																	0.0699734	0.00621729
Atraid																	-0.0922998	0.00093042
Atrn																			0.025958	0.00311075
Atrx													-0.147147	0.000117338							-0.109424	7.4976e-07																	-0.0975543	8.43353e-06
Atxn1															0.0537422	0.00992495
Atxn10																					0.083913	0.000372552
Atxn1l																			0.0229676	0.00211437																			0.0296466	0.00203123
Atxn2l																			0.0642867	0.000204704	0.0691097	0.00416285
Atxn7													0.102156	9.82376e-07	0.0594287	0.00329106	0.0836625	0.000333777	0.0803631	3.02835e-10	0.0598988	0.00095711																	0.0574932	0.00197512
Atxn7l1					0.159885	0.00155473							0.122751	1.13322e-06	0.0654095	0.000643641	0.123896	6.52905e-11			0.100647	3.08103e-07							0.108496	0.00942483									0.104694	7.58777e-08
Auh													-0.0693377	0.000780033	-0.0741987	8.79462e-06	-0.0870207	0.000120309
Aunip																			-0.0459948	0.000819382	-0.0361416	5.87439e-05
Aup1															0.0692121	0.000616245			0.0659872	7.71065e-05	0.0722052	0.00149157																	0.0835776	0.000196669
Aurka															-0.0288358	0.000220052	-0.0400326	0.00213135	-0.12067	9.01157e-26	-0.0914292	3.63742e-11							-0.562384	1.372e-27									-0.083635	3.02034e-13
Aurkaip1													-0.142309	1.30329e-06
Aurkb															0.0596474	1.53149e-10	0.11196	1.28701e-07	0.0293592	5.06387e-05	-0.00301989	0.00215086							-0.178464	0.00101341									0.054104	1.45107e-05
Auts2													0.0623793	0.000444614					0.031926	0.00585549
Aven													-0.0504283	0.00788839					-0.0509047	0.000104251
Avl9																					0.12014	2.67267e-10
Avpi1																			0.0213064	0.00119157	0.0391803	0.000348865
Axin1	0.135266	0.000107894			0.153021	0.0010496							0.0881875	4.62151e-05	0.0871865	1.19111e-09			0.0865858	1.25151e-11																			0.0557494	0.00444567
Axl													0.0347313	0.0085536
Azi2																					-0.0660063	0.00027093
Azin2																																							0.02769	0.00990183
B230118H07Rik													-0.0925167	7.50411e-06	-0.0722882	0.000226336					-0.0982617	1.96931e-05																	-0.0870139	9.51802e-05
B230219D22Rik																			-0.0707139	5.32885e-06	-0.094498	7.63954e-06																	-0.0639534	0.00852554
B230307C23Rik																					-0.0472635	0.00140831
B230354K17Rik																	-0.01999	0.000358388			-0.0692355	2.25895e-09																	-0.0463865	8.60661e-05
B230369F24Rik																	-0.0288654	0.0047764	-0.0191104	0.000730836
B2m													0.0738328	0.000119523	-0.0476076	0.00138518			-0.0750328	1.47028e-09																			-0.045781	0.00825203
B3galt4															-0.0255118	0.000386008	-0.0389582	0.000763296	-0.0209384	0.00553657	-0.0564252	6.11792e-09							-0.0739844	0.00371742									-0.0494881	2.38616e-08
B3galt6													-0.0530793	0.000155382	-0.0679233	2.95742e-08	-0.065212	0.000113878	-0.0948095	2.16575e-17	-0.105467	4.3824e-16			-0.101704	0.000507007													-0.0899409	1.71102e-12
B3gat3													-0.0485482	0.00166602
B3gnt5	0.394775	1.5098e-28	0.293547	8.14561e-05	0.333783	4.28511e-17							0.296127	3.22181e-73	0.542782	9.32289e-177	0.395426	1.34328e-92	0.422403	4.93734e-192	0.501394	1.6628e-124	0.542672	7.29442e-08	0.460491	1.15989e-32	0.361718	1.10635e-11	0.438362	6.11788e-21									0.500293	9.2681e-134
B3gnt8													0.0442655	0.000504278							-0.0344782	0.000394127
B4galnt1													0.0669287	0.000531414	0.0564862	0.00558744	0.0842885	0.000351781	0.0815344	1.71311e-07																			0.0744671	0.001367
B4galt1													0.0711908	3.85061e-06
B4galt4															0.0507144	0.000382098			0.0460491	1.03886e-05	0.134506	1.59201e-20							0.14851	8.94264e-07									0.0990625	1.00345e-11
B4galt5	0.0902744	0.00928674			0.0920135	0.00166386							0.10364	2.78291e-17	0.0636775	3.54499e-12	0.0618565	5.10421e-07	0.0834987	3.10872e-31	0.0822369	1.57773e-13							0.0659068	0.0006898									0.0684963	6.99102e-11
B4galt6																			0.0265418	0.00376546
B4gat1	-0.0880412	0.00324766											-0.0448483	0.000490231
B630019K06Rik																			0.00193623	0.00213899
BC002059													-0.0171111	0.00716267
BC003965																			-0.04352	0.00635156
BC004004															0.0499075	0.00109838
BC005537													0.0925784	0.00408995			0.0984023	0.00216759	0.074052	5.22674e-05
BC005561																					-0.0506844	0.00612208
BC005624																			-0.0468146	0.00204875
BC017643															-0.0594845	5.15141e-05	-0.0813397	0.000243356			-0.0572075	0.000191679
BC028528															-0.0580444	0.00660481					-0.0852027	2.92608e-05
BC029722													0.0568972	0.00116853							0.0569555	0.00198152
BC030867																			-0.0338963	1.19098e-05	-0.0304799	0.000532195																	-0.0193677	0.0082221
BC035044																			0.0995964	3.34681e-14	-0.220566	7.22128e-21			-0.172314	0.00605002													-0.0997042	7.66496e-06
BC037034															-0.0731075	1.1204e-11	-0.0826239	1.483e-08	-0.0803893	3.61631e-18	-0.0670707	2.67546e-07					-0.144691	0.0058625	-0.0893929	0.000791826									-0.0791956	2.34771e-11
BC051226																			-0.022031	0.00954014	-0.0340087	0.00914433
BC055324																			-0.0371808	6.9892e-06
BC147527															-0.0336197	5.1984e-08	-0.0294857	0.000942429	-0.0261292	2.23008e-09	-0.0450906	7.58291e-11																	-0.0421469	2.60585e-11
Babam1													-0.0720483	0.000612232
Babam2															0.0788783	0.00016845
Bach1													0.0658417	0.00772078	0.0823118	6.83405e-07	0.0838351	0.000434871	0.060247	1.21475e-05	0.10259	9.93862e-10			0.100525	0.0058154													0.0926544	1.55279e-07
Bach2															0.03927	0.000107982	0.0429923	0.00176578	0.0262593	0.000541698	0.03653	0.0011005																	0.0396757	6.64585e-05
Bad													-0.0643385	0.000241029			-0.0550999	0.00227451	-0.0412249	0.00630142
Bag1													-0.0952841	8.39034e-06
Bag2																					-0.0451433	0.0066123
Bag4															0.0423552	0.0056045
Bag5															-0.0744508	8.49326e-05			-0.0625856	3.61734e-05	-0.0519536	0.00658471																	-0.0804617	1.84888e-05
Bag6															0.0893722	2.2321e-06	0.0726032	0.00146704	0.0771902	2.37503e-06	0.118437	7.25577e-12			0.177714	1.89253e-05			0.155548	0.00280812									0.139937	3.68704e-14
Bahcc1													0.0535072	0.00183289	0.0883093	1.85979e-10	0.135117	2.28354e-14	0.0964764	2.33221e-18	0.0671509	2.92608e-05			0.0831206	0.00208004													0.0812818	1.04048e-07
Bahd1													0.0242053	0.00244769
Baiap2																			0.0826251	3.09263e-15	0.147335	1.71229e-17			0.0981958	0.00168646			0.19927	2.25064e-07									0.129997	3.0359e-15
Banf1													-0.158873	4.06377e-08	0.096523	9.29265e-05	0.105547	0.000110368
Banp													-0.0465402	0.00713965	-0.0576884	0.000104182			-0.0513119	3.36764e-06	-0.0585577	0.000428046																	-0.0675587	9.01725e-06
Batf													-0.100937	5.80643e-08			-0.0948506	4.72703e-06																					-0.045761	0.00657553
Baz1a																			-0.0649915	0.000220474	-0.0536228	0.000101431
Baz1b													-0.171865	1.40141e-10							-0.108909	4.99513e-06
Baz2a													0.0756597	0.000211318	0.0554887	0.00195404			0.0496781	0.000446386
Baz2b													0.10992	0.00121651					0.138021	2.61456e-16
Bbc3															-0.123485	7.53189e-30	-0.0784957	1.82644e-10	-0.0554938	7.47811e-14	-0.0449123	2.16453e-06																	-0.0601041	1.26927e-10
Bbs4																	-0.0424997	0.00565939	-0.0225902	0.00324397																			-0.0291646	0.00818243
Bbx													0.135168	2.70737e-05	0.129229	2.81808e-08	0.126997	1.1349e-05	0.0765951	1.74995e-05	0.121261	9.27624e-08																	0.113626	6.91605e-07
Bcap31																	-0.0864771	0.00573287	-0.0444019	0.00373518
Bcas2																			-0.0606832	0.000343097	-0.104319	7.32326e-08																	-0.0777194	0.000139855
Bcas3																					0.0247829	0.00567995
Bcat2													-0.0546375	0.00513783					-0.0272988	0.00746214	-0.0372898	0.00268814
Bccip																			-0.0800331	1.05573e-06
Bcdin3d													-0.0580518	9.14174e-05	-0.0458199	0.00113403			-0.0403539	8.93342e-05	-0.0455892	0.00305852							-0.10719	0.00116783									-0.0402734	0.00764914
Bckdha																			0.0459544	0.00474891
Bckdk													-0.110745	3.84256e-07
Bcl10													0.151244	1.97139e-08	0.122068	6.02029e-09			0.0990052	1.21702e-09	0.181479	1.19614e-22			0.171926	0.000188114			0.159383	0.00117012									0.124205	6.29588e-10
Bcl11a	-0.34127	0.00158905			-0.366015	1.68952e-05							-0.32147	7.9964e-20	-0.195663	4.03673e-17	-0.240524	1.25764e-14	-0.216923	3.34511e-32	-0.200152	2.06612e-14			-0.219656	0.000138173													-0.203288	1.42714e-15
Bcl2																			-0.111374	8.73784e-12	-0.230584	1.70711e-23			-0.197025	0.000132712			-0.163004	0.00444058									-0.138777	1.23093e-09
Bcl2l1																			-0.0413492	4.75729e-05
Bcl2l11															0.465546	1.25023e-128	0.184304	4.85858e-33	0.396701	1.59843e-156	0.803428	2.15339e-258	0.599894	6.55766e-11	0.436834	2.44127e-33	0.201131	0.00405242	0.850127	2.27665e-61									0.631064	1.45388e-180
Bcl2l12													-0.0871346	7.30867e-08																									-0.0595383	0.00937047
Bcl3															0.0580299	4.94599e-13	0.0384057	0.00132328	0.0905591	1.33667e-29	0.14476	2.17665e-35			0.090431	2.52796e-07	0.157672	0.0023777	0.18875	1.7832e-11									0.128688	6.38697e-35
Bcl7a													-0.052677	0.00338883
Bcl9													0.0588768	0.00712092					0.0408756	0.000144243
Bclaf1													0.177523	9.98546e-07	0.0999789	2.56592e-06	0.152038	1.68654e-08			0.0714584	0.00134897																	0.0833427	0.000109134
Bclaf3													0.0677041	0.000508957	0.108701	6.378e-08			0.0469923	0.00616021																			0.0580152	0.00823657
Bcorl1															-0.0360289	0.00115378					-0.0299015	0.0076671																	-0.0344218	0.00106729
Bcr																			0.0910267	3.5461e-17	0.0969057	5.89513e-10							0.102655	0.00224214									0.0888882	1.10702e-09
Bcs1l													-0.0848353	7.23758e-10	-0.0782379	6.08078e-09			-0.0780626	1.14985e-11	-0.0974138	1.3487e-10							-0.129627	0.000529166									-0.0768357	1.19484e-07
Becn1																																							0.0606542	0.00832884
Bend4	0.180909	1.51978e-18			0.161631	3.11762e-09							0.145636	3.54196e-38	0.204084	2.99539e-60	0.17272	8.9441e-25	0.101729	5.66134e-25	0.236538	8.65423e-55			0.16099	1.0121e-06	0.32882	2.14066e-09	0.193584	8.72578e-10									0.224638	1.34614e-49
Bend5																			0.0354399	1.12831e-05
Bet1													-0.13167	5.26693e-08	-0.0979222	2.3623e-08	-0.0859165	0.00428343	-0.124877	1.382e-16																			-0.0747658	0.000479885
Bet1l													0.0936305	5.67314e-06
Bex1													0.0639063	0.00667845
Bex3															0.145887	3.33655e-13	0.0806945	0.000848325	0.0242233	0.00534577	0.115841	1.65685e-08																	0.12287	3.55848e-10
Bex4																					0.0373987	0.00070574			0.0994595	0.0096762	0.256164	0.00042106
Bex6															-0.0865932	2.41612e-20	-0.0286818	0.00302528	-0.111666	2.84574e-16	-0.367983	1.65456e-60			-0.306978	1.81794e-13			-0.250802	2.58211e-08									-0.259189	2.22427e-39
Bfar															-0.08826	1.64528e-05	-0.0879099	0.0031801	-0.0711042	1.23107e-05	-0.0867661	6.55419e-05																	-0.0822703	0.000177686
Bgn					-0.0502127	0.00748881													-0.0747799	1.43717e-10
Bhlhb9																			-0.0508974	0.000211694
Bhlhe40																					0.0272432	0.000136509
Bicd1													0.0414053	0.00074669					-0.0269499	0.00270732	-0.067327	0.000110384																	-0.0607591	0.000793982
Bicd2													-0.0357798	0.00343445
Bid													-0.0672587	7.58705e-06					-0.0496169	6.37205e-05	-0.0613102	0.00034149																	-0.0443158	0.00493992
Bin1																											-0.0422526	0.00645456
Bin2													-0.131277	7.4573e-05
Bin3																			-0.0455207	0.000645861	-0.0140434	0.00893631
Birc3					0.0790617	0.00157215							0.0904698	5.34736e-08	0.0816913	2.71175e-09	0.0427926	0.00501211	0.0707464	1.55917e-15	0.0875125	2.17253e-10																	0.0835234	6.69442e-11
Birc5															0.0826002	8.06934e-05	0.187675	2.19304e-07	0.0869711	3.31341e-12					0.214521	0.00411529			-0.287096	5.28958e-10									0.124907	7.60073e-07
Blcap															-0.0420777	0.00178827
Blm															0.0674575	1.72985e-07	0.0647041	0.00240276	0.0514362	0.00191119	0.0584606	0.00494246																	0.0751364	2.32067e-05
Blmh																	0.0748132	0.00860308
Bloc1s1															0.0284435	0.0015201			0.0242545	0.00394612
Bloc1s2															-0.0628798	0.000924866
Bloc1s5															-0.055096	6.67322e-06
Blvra					-0.130568	0.00462235							-0.0974806	1.16702e-09					-0.0500325	0.00243471
Blvrb															-0.0846464	2.55912e-05			-0.108242	5.90879e-12																			-0.0571603	0.0028491
Bmpr2													0.149956	9.82871e-13			0.0706877	0.000202186			0.0456288	0.00318996																	0.0458052	0.00820422
Bmt2																			0.0445049	3.10232e-06
Bmyc													-0.115814	1.72299e-05					-0.0742894	2.13719e-08	-0.190069	2.7522e-19			-0.16888	7.53444e-05													-0.133661	9.38987e-13
Bnip1																					-0.0487947	0.00389552
Bnip2															-0.0833694	0.000182084			-0.0785788	2.24561e-06	-0.1182	1.23958e-08							-0.207578	0.000614456									-0.0952931	8.97116e-06
Bnip3l																			-0.0491405	2.93811e-05
Bok																	0.0452671	0.000331239
Bola1													-0.0769007	0.00129916			-0.109506	0.00020941	-0.0491901	0.000445381	-0.0924706	5.40367e-05			-0.175361	0.000440748													-0.0745943	0.0024019
Bop1													-0.0497317	0.000452512
Bora													-0.0436302	0.0058664					-0.146368	2.24164e-20	-0.0924387	2.23322e-07							-0.338992	6.77732e-11									-0.0891799	4.81377e-07
Borcs6													0.0832563	8.80477e-05					0.0533708	3.10968e-08	0.0414599	0.000731994
Borcs7																					0.0646353	0.00037453
Borcs8													-0.0662838	0.00259766											-0.105632	0.00432509													-0.0529839	0.00421191
Bphl													-0.0826469	3.86978e-05			-0.0608471	0.00718656
Bpifc																			0.0174271	0.000408857
Bptf													0.116757	0.00292934	0.0936942	0.000107646	0.105937	0.000616152	0.0760886	6.64463e-05	0.0782589	0.00136634
Braf													0.0949861	9.01974e-07	0.0823202	2.88948e-09	0.0972322	1.0845e-05	0.0988457	3.5587e-19	0.110794	5.03094e-13							0.139717	0.00174752									0.109197	3.52796e-13
Brap													0.111759	2.92409e-10	0.0453901	0.0092507	0.0751285	0.000156083	0.0677751	1.13623e-08	0.0475502	0.000994759																	0.054241	0.0013928
Brat1															-0.0235294	0.00812546			-0.0245957	0.000711748			0.00582355	0.00332896
Brca1															0.0297446	0.000116241
Brca2													-0.0528303	1.49852e-07	0.0953987	8.72936e-09	0.126855	1.3777e-05
Brcc3																			-0.0435832	0.00663536
Brd3															0.0847593	0.000342135
Brd4					0.172204	0.0056695							0.128968	0.000159776	0.153878	4.31707e-13	0.118696	1.52656e-05	0.0736112	4.76694e-05	0.104108	4.71749e-06																	0.115074	2.52316e-07
Brd7													-0.120975	4.73834e-07	-0.073064	0.00173539			-0.0956373	2.29054e-08
Brf1			0.222309	0.00396055											0.0578107	5.28248e-05
Bri3bp																			0.0545657	0.0044225
Brip1os					-0.030335	0.0072721							-0.0455467	0.00323358							-0.0737109	6.99947e-05																	-0.0543329	0.0025778
Brix1													-0.0770385	0.00077669					-0.0812006	5.38772e-08	-0.108737	1.04786e-06
Brk1													-0.0997641	0.00259809
Brms1													-0.0541696	0.00205647			-0.0727431	0.000358388
Brms1l																			-0.0296035	8.00142e-05	-0.0377695	0.000939332																	-0.0349997	0.00090287
Brox													0.0215464	0.00537028
Brpf1															0.0344313	0.00126064	0.0385241	0.00934851	0.0353587	0.00210121	0.0506358	0.000589633			0.0875994	0.00677724													0.0491507	0.000300695
Brwd1													0.0538023	0.000927137	0.0525168	0.00151465			0.0523496	2.64493e-05
Bsg																			-0.0530032	0.00110378
Bsn															-0.0449937	1.89274e-06	-0.0456579	0.00186526	-0.0512864	1.4636e-10	-0.0667179	5.84048e-10			-0.103754	1.68852e-06													-0.0635927	3.23282e-11
Bst2															-0.0546887	1.97146e-05	-0.167068	5.13666e-08	-0.0852401	2.91754e-05	-0.115436	6.41314e-06																	-0.0831062	0.00336445
Btbd1															0.0707311	0.000202678			0.0567035	0.000690963
Btbd10																			-0.0340414	5.41903e-05
Btbd2													-0.080782	1.98422e-06	-0.066835	7.85119e-06
Btbd7													0.0686133	0.00596521
Btd																			-0.0295905	0.000927656	-0.0359706	0.00205027
Btf3l4													0.0703055	5.20238e-05					0.048189	2.12725e-06
Btg1															-0.112774	3.95915e-06	-0.0380628	0.00557281			0.243586	1.8007e-28	0.403145	0.0043012					0.196676	0.00524546									0.116337	5.84521e-08
Btg2													-0.148556	0.00252735	-0.271174	7.26154e-23	-0.147754	4.3577e-05	-0.171677	2.84255e-09																			-0.104605	0.00100286
Btg3	0.337454	6.84796e-17	0.318794	0.0020548	0.189003	3.90237e-07							0.233077	2.11406e-46	0.168172	9.60371e-43	0.17999	8.91504e-30	0.133801	1.33027e-42	0.134961	2.18287e-27			0.0849994	0.000265334			0.149675	7.59256e-07									0.139495	9.81017e-29
Btk													-0.0762425	1.98738e-05					-0.0739859	8.92367e-07	-0.0671744	0.000642877																	-0.0639369	0.000853757
Btla																					-0.0295883	0.00159114
Btnl9																					-0.0253601	0.00193837
Btrc															-0.037554	0.00606655																							-0.0395181	0.00311086
Bub1b																	0.0694282	0.000978429	0.0440837	0.0032814
Bub3													-0.0645244	6.7343e-06															-0.169529	9.49527e-05
Bud23													-0.0973257	3.56106e-07
Bud31																			-0.0848355	9.10914e-08
Bysl																			-0.0389463	0.00183219
Bzw1													0.110341	0.00196585
Bzw2													-0.189582	9.55805e-12
C030034L19Rik																					-0.0883015	7.14846e-12																	-0.0615683	4.05247e-07
C030037D09Rik															-0.0499676	5.58383e-06	-0.0550045	0.000767853	-0.0289949	0.000207557	-0.0572393	2.86574e-08																	-0.058134	3.25597e-09
C1d													0.139221	6.10645e-06	0.0644022	0.0058718	0.0761692	5.21641e-06
C1galt1c1															-0.0418864	0.000111655			-0.0354967	7.31147e-05	-0.0365908	0.00101947																	-0.0365551	0.000923634
C1qbp					-0.276194	0.0011415							-0.212594	2.06463e-11					-0.0514803	0.00152267
C1qtnf12													-0.0859502	6.96888e-06
C1qtnf4													0.0594139	0.000660311
C1qtnf6																	0.0581054	0.00628059
C1rl													-0.0676184	0.000173554	-0.0342832	0.000338496	-0.0602544	0.000859276	-0.0412497	7.73185e-10	-0.0122757	0.00582176							-0.0451446	0.0062735									-0.0284427	8.76641e-05
C2cd2																			-0.028214	0.000362901
C2cd3																					0.0753388	7.72926e-06																	0.0549153	0.00264346
C2cd5															0.0479022	0.0025129			0.0571958	0.000121835
C330007P06Rik																					0.0557293	0.000553304
C330018D20Rik															-0.021752	0.00170479			-0.0290903	0.000116346	-0.0285174	0.00394159																	-0.0290713	0.00465153
C330027C09Rik																			-0.00811858	0.000605994
C87436															-0.0603561	0.00106194			-0.0541898	0.000131102	-0.0664426	0.000394329			-0.113163	0.00447753													-0.0698326	9.76681e-05
C920006O11Rik													0.0400185	0.00487451					0.0225946	0.000357511	0.0315863	0.00216982
CAAA01118383.1													0.0524731	0.00453534
Cab39															0.0949271	6.67723e-07	0.12582	2.81315e-07	0.0812285	1.16767e-07	0.0760032	0.000254134																	0.0951232	5.267e-06
Cab39l																			-0.0345491	0.00909378
Cabin1															0.0613425	0.00629067	0.102507	5.24606e-05	0.094953	9.19109e-10	0.084154	0.000123198																	0.0626907	0.00559784
Cables1	0.280158	8.02739e-29			0.177352	1.55377e-08							0.255717	1.48636e-82	0.593016	2.95923e-247	0.342364	1.71052e-88	0.327827	7.19256e-161	0.421553	1.31211e-144	0.334126	3.94364e-17	0.304858	7.44062e-23	0.481076	8.6163e-16	0.316627	1.15263e-29									0.433735	2.32429e-144
Cables2															0.0358566	0.00478203	0.0658727	0.000459562			0.057393	2.59451e-06							0.0744355	0.00587069									0.0456189	0.000753743
Cacna1a															-0.0598571	0.000139106																							-0.047624	0.00659196
Cacnb2													0.069207	0.000204092					0.0309627	0.00162113
Cactin															-0.0480609	0.00042118	-0.0498316	0.00994843	-0.0422842	0.000596981	-0.0503882	0.00140272							-0.122391	3.41489e-05
Cacul1																																							-0.0110621	0.000483478
Cacybp													-0.178744	1.47048e-11					-0.0656231	0.000327303
Cad													-0.0337681	2.05505e-05	0.0533131	0.000114184	0.0755536	0.000351605			0.0615581	0.000994686																	0.0647288	0.000306489
Calcrl															-0.0985227	7.88633e-10					-0.132606	2.79587e-13																	-0.111851	3.15909e-11
Calhm2													-0.0704462	4.90193e-09	-0.0595871	1.49215e-07	-0.0496191	0.00167621	-0.0912483	1.16593e-21	-0.180157	6.00422e-40			-0.107095	0.000201009			-0.146985	2.01104e-06									-0.141691	1.89525e-28
Calm1													-0.11663	4.82089e-05					-0.0684486	3.12266e-06
Calm2																			0.0547202	0.00158632
Calm3													-0.139752	1.78402e-05
Calr													-0.177598	1.15583e-12
Calu																					0.0814586	2.68471e-05																	0.0769251	6.80686e-05
Camk1															-0.0683177	0.000718834	-0.105813	8.6784e-05
Camk1d																			0.060131	1.56426e-12	0.0490724	0.00317878																	0.0455675	0.0042356
Camk2d													0.0801757	0.00755432							-0.0841242	6.96381e-05																	-0.0664175	0.00468746
Camk2n1													0.124166	7.88124e-18
Camkk2																					-0.0882345	0.000124232																	-0.0645225	0.00862797
Caml													-0.0508811	0.00470488	-0.0756277	1.32368e-07	-0.074767	0.00238807	-0.0680298	5.51911e-08	-0.0335589	0.00371652																	-0.0480729	0.000107258
Camsap1																					-0.0395774	0.00339135
Capg													-0.126053	0.00080311	-0.138336	4.29716e-09	-0.0702343	0.00474037	-0.110391	3.58904e-10
Capn1																					0.0734372	5.98652e-07							0.109335	0.0024499									0.0696783	5.32754e-06
Capn10													-0.0291372	0.00662052	-0.0267396	0.00672915					-0.0295472	0.00206514																	-0.0285038	0.001068
Capn2													0.0675721	0.000350059					0.0364605	0.00099219
Caprin1																			0.0609024	0.000857171
Capza1															0.103225	4.30582e-07	0.0840435	0.00191269	0.093931	2.37433e-09	0.0873965	0.000178287			0.184559	0.000219431													0.0930781	3.60952e-05
Capza2					0.238041	0.005067							0.161908	1.86622e-06					0.0459834	0.00529387
Capzb															0.0719101	0.00104338			0.0520551	0.00104363
Car1																			-0.0425832	0.000123954
Car13																			-0.0327563	2.47304e-07
Car2			-0.510235	0.000242339									-0.392727	1.8862e-28	-0.158074	1.60485e-12	-0.136318	1.78507e-05	-0.37248	8.97545e-55	-0.158374	2.04242e-07							-0.318135	0.000218356									-0.223188	5.69816e-13
Card19															0.194086	5.66903e-21	0.0952388	0.00263149	0.0822601	1.82504e-06	0.174872	2.01283e-17			0.151328	0.00164305													0.156776	8.09032e-14
Carf					0.146012	3.87865e-05							0.0813683	7.89547e-09	0.0396077	0.00194695	0.0936595	1.33255e-07	0.0339632	0.00137493																			0.0416894	0.00101935
Carnmt1													-0.0914181	3.95212e-05					-0.100241	1.63093e-10	-0.15386	6.95712e-14			-0.158108	0.00309875													-0.11865	8.59156e-09
Carns1															0.0250684	0.00364079			0.0193897	0.00904603	0.0307421	0.00438031																	0.0267428	0.00950727
Cars2													-0.0755026	2.36199e-05					-0.0541686	8.95952e-05	-0.0752006	0.000149729
Casc4													0.0505728	0.000258603					0.0354576	0.00101597
Casd1			0.146886	0.00317735
Casp1													-0.0675877	0.000876406	-0.077604	4.91387e-07	-0.0948308	9.85753e-06	-0.0529889	5.91466e-05	-0.120645	2.82892e-12							-0.111163	0.00297285									-0.0972522	8.1908e-09
Casp12																			-0.0442482	8.64181e-07
Casp2													-0.049249	0.00504317					0.0620355	2.91547e-05
Casp3													0.047967	2.96711e-06			0.0949483	0.00177057			0.0369829	0.00830398
Casp4																					0.050398	0.00175945
Casp6															-0.0565363	0.00147686
Casp8													-0.0786997	0.00152102	-0.101882	4.37389e-06	-0.144246	1.5385e-06	-0.0987225	3.8735e-09	-0.141656	6.93668e-10			-0.177531	0.00148026													-0.141031	7.57487e-10
Casp8ap2	-0.151039	0.00106984											-0.061861	0.00329006
Cast													0.132563	4.6691e-07	0.0741477	0.000536839	0.0800489	0.00480354	0.0693048	1.09929e-05	0.0649927	0.0043971																	0.0666167	0.00322942
Cat													0.0893451	0.00242176
Cav2					0.104766	0.00236067							0.0996413	1.48954e-08
Cavin2													-0.107465	2.8248e-09
Cavin3													-0.117077	6.57917e-06	-0.0593693	0.00313539			-0.0931989	7.81693e-12																			-0.0501635	0.00185659
Cbarp	0.182328	3.13863e-06			0.135323	7.01895e-06							0.206163	3.57991e-47	0.0405447	6.73279e-08	0.109672	2.10151e-16	0.0302601	1.77702e-07	0.0415896	1.90201e-06					0.190669	6.84356e-06	0.049445	1.58581e-05									0.051257	1.88008e-09
Cbfa2t3	-0.408663	7.21138e-05			-0.346471	0.000169313							-0.451675	6.29578e-41	-0.439495	2.50666e-83	-0.425824	4.02191e-44	-0.348527	2.75096e-80	-0.26383	2.0534e-29			-0.270528	3.27354e-07	-0.30657	0.000101981	-0.375871	1.06659e-09									-0.344096	7.56506e-51
Cbfb															0.0659987	0.0048062			0.0719873	7.22496e-05					0.168171	0.00147979													0.0800577	0.000899355
Cbl													0.142724	1.93814e-08					0.0457215	0.00155189
Cblb	0.108374	0.0091321			0.0988487	0.000669397							0.0929647	1.71609e-10							0.0515126	5.35589e-05
Cbll1															0.0472312	0.00449273
Cbr1													-0.132181	7.78706e-07	-0.0884828	2.83125e-05	-0.0805187	0.00205717	-0.0653531	5.39047e-06	-0.0699374	8.35965e-05			-0.0825893	0.00364886													-0.064439	0.000180646
Cbr4																			-0.0286005	0.00319884	-0.0483531	8.01079e-05																	-0.0426778	0.00185659
Cbwd1															-0.0268504	0.00787527
Cbx1													-0.093605	1.42977e-05					-0.0753156	7.7651e-06	-0.114156	8.51645e-09																	-0.0629954	0.00281839
Cbx3															0.0758082	0.00228361
Cbx4																			0.0439091	7.76719e-05
Cbx5	-0.174018	0.00603938											-0.136141	6.17479e-13	-0.0592486	0.00043579			-0.0745522	0.000114778
Cbx6															-0.0674465	0.000522816
Cbx8															-0.0500977	8.99054e-10	-0.029355	0.00375929	-0.0341514	2.42973e-08	-0.0639033	1.08477e-09			-0.0615168	1.81126e-05													-0.0620081	3.9845e-12
Cby1													-0.0671494	1.29674e-08	-0.0521014	0.000643059			-0.0549232	2.3863e-05
Cc2d1b																																							0.0493908	0.00446097
Ccar1																	0.0953241	0.00576342
Ccdc102a																												0.00668338
Ccdc107																					-0.0728163	2.64846e-07
Ccdc112													-0.130834	1.4585e-07	-0.0681584	3.95353e-05	-0.100044	5.74038e-05	-0.0515198	9.35994e-09	-0.0372208	0.00428383																	-0.0505906	0.000548776
Ccdc114																					-0.024426	0.00693769
Ccdc115																	0.0829349	0.00549484			-0.0652956	0.00433891
Ccdc117													-0.0369174	0.000877807					-0.0337526	0.000462053	-0.0236723	0.00613013
Ccdc12													-0.104866	0.00732564			-0.108237	6.29701e-05	-0.0654222	6.06127e-05	-0.0817243	0.000124359																	-0.0760574	0.000404401
Ccdc126															-0.0251412	5.72052e-05			-0.034318	8.91951e-10
Ccdc127																			-0.0769768	9.30567e-10	-0.0627293	0.000328923			-0.106167	0.00809039													-0.0707673	2.41943e-05
Ccdc130													-0.0370467	0.0015442							-0.0270611	0.00990813
Ccdc134													-0.0157382	0.00744862
Ccdc166	-0.0802426	0.00129413											-0.0369601	0.00055526			-0.0414623	0.00664705			-0.0360281	0.00191797
Ccdc167													-0.058113	1.48954e-08					-0.0296507	0.00151026
Ccdc173													-0.0365753	0.000170135	-0.0307589	0.00351906
Ccdc18																																							0.00505744	0.00656869
Ccdc181													-0.0486193	0.00129916	-0.0385351	0.00951263			-0.0247223	0.00472546					-0.0657373	0.0080317
Ccdc186																																							-0.0275611	0.00602473
Ccdc191													-0.0725475	8.11781e-07			-0.0756235	0.000134018	-0.041024	0.000624296	-0.0428816	0.00988188			-0.0774252	0.00280196
Ccdc22													-0.0416136	0.00343445
Ccdc28a															-0.0389195	0.00501941			-0.0338783	0.000927656
Ccdc28b													-0.0796152	5.24245e-06	-0.0855929	1.90817e-07	-0.120868	1.05093e-08	-0.0885204	8.29703e-11	-0.103476	2.40102e-08																	-0.11149	2.42394e-10
Ccdc34													-0.116597	7.46852e-14							-0.0895073	0.00284346							-0.207522	0.000165994
Ccdc43													-0.037455	0.00274598
Ccdc51													-0.028133	0.000746835					-0.0288709	0.000174135	-0.0413686	3.67619e-05																	-0.0262887	0.00909066
Ccdc58													-0.0532648	0.00164957					-0.0495839	0.000454782	-0.0690083	0.000128284
Ccdc60													0.0341964	0.00253463
Ccdc61																			-0.0458243	2.86255e-05	-0.0724001	2.62636e-08							-0.126286	0.000324521									-0.0509761	1.60474e-05
Ccdc66																			-0.045832	3.76209e-06
Ccdc77													-0.0518728	0.000381193					-0.0529694	3.52675e-05	-0.067208	3.40924e-05							-0.147515	0.00179242									-0.0461812	0.00597822
Ccdc84																					-0.0250803	0.00992897
Ccdc85b															0.0612747	2.2974e-07	0.0847744	2.56276e-08	0.0742684	4.94013e-17	0.0443906	9.58994e-06					0.131843	0.00778365											0.0528191	5.83643e-05
Ccdc9													0.0738206	0.000532416					-0.0270582	0.000117545
Ccdc90b													-0.0618972	0.0006509							-0.0433542	0.000350916																	-0.0467004	0.00269164
Ccdc91													-0.057666	0.00661907
Ccdc97																			-0.0415322	3.62901e-05
Ccl27a													0.0977462	3.08951e-06
Ccl3															-0.104101	1.57797e-09			0.268916	7.61513e-21	0.102489	0.0010368
Ccl4																			0.320856	1.1452e-32	0.321614	2.51499e-18	0.946313	1.82953e-08					0.306795	3.40892e-05									0.171678	1.3086e-05
Ccl5																									-0.0129156	0.00522889
Ccl9															0.0648585	1.39897e-08			0.255442	1.02746e-43	0.113715	4.13165e-07																	0.115347	2.88153e-09
Ccna2															0.0611789	3.95433e-10	0.0934761	0.000343087	0.0514527	0.000706976									-0.216153	0.00117012									0.0667285	0.00135809
Ccnb1															0.00113332	0.00180845			-0.0453115	4.90461e-06									-0.424231	4.82075e-08
Ccnb2															0.0749646	0.00017459	0.14697	4.90314e-06	0.108888	0.000528019	0.105319	0.00248797			0.126136	0.000668268													0.131676	8.5034e-06
Ccnc																			-0.0600575	3.73333e-09
Ccnd1	-0.195289	0.00497345											-0.126669	5.70655e-10
Ccnd2																					-0.13489	1.06528e-06			-0.198584	0.00301277													-0.108945	5.96761e-05
Ccnd3															0.115451	3.11204e-07	0.137927	3.81509e-06			0.0755661	0.0050285																	0.0719014	0.00757571
Ccndbp1															-0.082947	1.56314e-05
Ccne2																			-0.0337562	0.000384686	-0.04147	0.000124232
Ccnf																			-0.105229	1.42167e-24	-0.10556	2.79862e-18			-0.0597411	0.00908862			-0.371821	1.03946e-21									-0.0822571	4.3928e-16
Ccng2															-0.0580079	0.000111527													-0.159845	0.003136
Ccnh													-0.104637	0.000531566							-0.0678966	0.00687908
Ccni															0.069906	0.00338919			0.0837842	2.74399e-06
Ccnj																					-0.0212966	0.000208688
Ccnjl															0.0339433	2.45514e-05			0.0221492	0.000136317	0.0245578	0.00423272
Ccnl1															-0.144274	5.58525e-09	-0.11271	0.000587088			0.153676	3.87431e-12
Ccnl2													0.124027	5.45053e-05	0.052685	6.20091e-05			0.0563281	0.00193043	0.097918	1.65428e-05			0.147302	0.00960105													0.0828318	0.000114754
Ccnt1					-0.303788	8.57641e-05							-0.0419858	1.23839e-06	-0.0466824	0.000248981			0.026885	0.00241144	0.137709	3.95863e-12							0.187796	0.000710674
Ccnt2															-0.0569616	8.80215e-05			-0.059246	1.86321e-05	-0.103164	1.03589e-09			-0.0969497	0.00233733													-0.0762294	4.50207e-06
Ccny																					0.0473933	0.006187																	0.0498783	0.00135479
Ccpg1															-0.0531039	0.000181793					0.033012	0.00421311
Ccrl2	0.143021	6.63192e-05											0.0616185	7.77822e-05					0.050315	3.52241e-05
Ccs																			-0.0441505	0.00655587
Ccsap															0.0234613	0.00173371					0.0351545	0.000398784																	0.0340771	8.65134e-05
Cct2															0.0932572	6.53466e-08	0.115039	2.37015e-06	0.0274075	0.00833541																			0.0760556	5.92628e-05
Cct3					-0.277189	0.0064429							-0.251858	9.09638e-14					-0.0773172	8.90899e-07
Cct4													-0.147948	3.75134e-06	-0.0574601	0.00546855	-0.0847054	0.000359157			-0.0969234	1.5611e-07																	-0.069576	0.000485051
Cct5	-0.229585	0.00884037			-0.327348	0.000158828							-0.267012	2.31435e-18	-0.0553599	0.00246579	-0.081029	3.03797e-07	-0.0860762	3.05323e-09
Cct7													-0.0993861	0.000393689			0.0695513	0.0011286	-0.043818	0.00596537	0.0589841	0.0012221
Cct8													-0.186102	6.96095e-08					-0.0985917	1.41431e-11
Ccz1			0.34022	0.0098799											0.06574	0.0015136
Cd151															-0.0681077	1.39482e-05			-0.0432964	0.000661291
Cd164															0.0786482	5.81378e-05	0.0945343	1.9293e-05	0.0970718	1.92707e-10	0.0684429	0.000874912			0.141969	0.0011163													0.0929848	5.33161e-06
Cd180																			-0.0524878	4.43619e-10	-0.0853318	8.67282e-12							-0.112055	0.000877451									-0.0520541	1.43125e-06
Cd200r1															-0.0599713	4.88852e-07
Cd244																			0.0447916	1.85025e-06	-0.0599915	0.00222703
Cd24a															-0.11385	9.80465e-07	-0.0479817	0.00488496	0.0550104	0.00137363	0.0684733	0.00178797
Cd27													-0.0953268	0.00957357	-0.18505	5.05581e-17	-0.173387	1.9911e-07	-0.108047	8.91219e-09	-0.239221	1.56566e-26			-0.25773	1.84255e-06			-0.279601	9.98158e-07									-0.199821	1.48988e-18
Cd274															0.0694251	2.85073e-06			0.0700844	8.56593e-12	0.153743	3.19457e-24			0.116575	0.000433636			0.106522	0.00722971									0.116874	2.5197e-15
Cd2ap													0.0742084	0.00160498
Cd300a																	-0.0634396	0.00409416
Cd320													-0.0693915	2.30076e-05			-0.0518959	0.00464955	-0.0382607	0.00569476
Cd34															0.0993174	5.30148e-08	0.0932993	0.00198154	0.182116	9.23386e-19							-0.262553	0.00490939
Cd37													-0.0798322	0.00121881	-0.168953	1.75966e-14	-0.109814	0.000232885			-0.181679	1.04011e-15					-0.2764	4.67846e-05											-0.148419	4.55141e-10
Cd38					-0.00984791	0.00123647
Cd3eap													-0.113219	4.80659e-09	-0.127083	2.88267e-15	-0.109446	9.99725e-06	-0.0938335	4.20903e-12	-0.129221	3.28353e-13			-0.134428	0.00250983													-0.135543	4.19454e-15
Cd44																	0.0985119	0.000182667	0.0722124	5.34296e-05
Cd47															-0.129046	5.34572e-13					-0.132601	4.67922e-12																	-0.102653	2.73832e-07
Cd48																			-0.109418	2.33694e-08	-0.263356	1.17329e-25			-0.235008	0.000824878													-0.163514	1.29494e-11
Cd52																			0.128857	5.13149e-09	-0.0839157	0.000187246
Cd53					0.0904659	0.00938989							0.0866702	8.00103e-16	0.115027	1.51189e-06	0.0700698	2.70016e-08	0.27104	3.87226e-50			0.360034	0.00116174															0.112932	4.87282e-05
Cd55																			-0.0601222	1.06927e-12
Cd63																			-0.0116754	0.000167874
Cd68																													0.0260551	0.00120723
Cd69																									-0.195885	0.00404536
Cd74													0.17712	0.00369184	-0.0201571	1.19811e-07	0.00548105	0.00151483	0.038437	0.00224572
Cd79b													-0.105096	1.69649e-06	-0.0771764	9.77851e-07	-0.125079	7.58263e-09	-0.0873129	5.925e-12	-0.134543	1.85624e-15			-0.108973	0.00965654													-0.111768	1.04735e-11
Cd81													0.0959609	0.000710715
Cd82													0.124727	5.74603e-07					0.0402631	0.000523783
Cd84																					-0.081465	4.26815e-05
Cd86													0.0391251	0.00203722					0.0272132	0.00235134	0.0587362	4.27027e-09							0.0341225	0.00801734									0.0412509	7.94875e-05
Cd9																			-0.0505642	6.91465e-06									-0.227638	0.00320837									-0.0824556	0.000811419
Cd93															0.130134	1.36282e-08			0.234185	3.01152e-38	0.202259	3.42852e-17																	0.184782	5.61102e-16
Cdadc1															0.0588803	0.000733049			0.0402481	0.00867049	0.0710684	5.82102e-05																	0.0703309	6.57526e-05
Cdan1																			-0.029359	0.00283283
Cdc123													-0.0965132	9.60584e-09					-0.0842347	4.07191e-07
Cdc16													-0.0732814	0.000730289					-0.0963901	3.44037e-10
Cdc20													-0.0477238	8.92879e-09					-0.162888	3.3051e-10	-0.102175	0.000641494							-0.586037	4.01852e-15									-0.0717724	0.000709477
Cdc25c																													-0.145505	0.00667243
Cdc26													-0.0754094	0.00751198					-0.0601166	0.00058715
Cdc37																	0.0615002	0.00823859	-0.0689375	7.54377e-08
Cdc37l1													0.0908973	0.000661112
Cdc42bpb													0.0440266	0.000292649
Cdc42ep3	-0.258578	1.25137e-06			-0.189264	0.0047417							-0.273925	6.84543e-37	-0.349565	4.02469e-78	-0.304678	1.02356e-33	-0.25471	2.8717e-66	-0.381762	1.65189e-85			-0.274108	1.37341e-13	-0.254591	0.000106878	-0.407366	3.9587e-19									-0.356571	5.93199e-83
Cdc42ep4													0.0366535	0.00170583	0.0302071	0.000989488	0.0676154	7.19953e-07	0.0350182	5.55362e-06																			0.0298942	0.000616884
Cdc42se1													0.171142	8.56335e-13	0.108313	2.70113e-10			0.112495	1.95259e-14	0.131496	2.44373e-11																	0.123423	3.29752e-10
Cdc42se2													0.0818726	0.00273903	0.0764459	0.000465327			0.0569018	0.00028301	0.0661794	0.00554634																	0.0621765	0.00578719
Cdc45																			-0.0384328	0.00608115
Cdc5l													-0.123428	8.66875e-06			-0.0988048	0.00195611	-0.0762053	4.93846e-05	-0.0861475	0.000643283
Cdc6													-0.0311436	8.98053e-06					-0.0639035	4.4168e-08
Cdc7													-0.0361555	2.08551e-09					-0.0865216	1.40615e-11	-0.0604131	0.000556393																	-0.0463647	0.00833192
Cdca2																			-0.112153	1.50577e-16	-0.136159	8.94407e-14							-0.416481	1.11696e-14									-0.0979902	1.63892e-10
Cdca3															0.0646817	7.75627e-05	0.164427	9.63605e-10	0.0845669	5.13342e-05																			0.0941951	0.00145788
Cdca5															0.0393841	0.0013044									0.13134	0.00576846
Cdca7	-0.350552	2.68921e-07			-0.147582	0.00144972							-0.273033	2.3212e-43					-0.125476	9.42562e-10	-0.0972473	2.30185e-06			-0.150922	0.00942959													-0.0641646	0.00644992
Cdca7l													-0.146566	1.65355e-10
Cdca8																	0.146262	0.000679287	0.0792364	1.57099e-05	0.0379747	0.00384023							-0.243344	1.13125e-07									0.0882743	0.00122416
Cdip1																					0.0554797	0.00198034
Cdk1	-0.0693392	0.00359012											-0.0574535	8.14548e-13			0.120168	0.0015102	-0.14363	9.7155e-24	-0.171641	1.33533e-09							-0.502527	1.03735e-22									-0.0582998	1.05475e-07
Cdk11b					-0.333049	0.000377516							-0.173545	7.60929e-08	-0.107455	3.9417e-09	-0.152143	1.01154e-06	-0.0849869	1.57305e-08
Cdk13													0.114917	2.96711e-06	0.0534159	0.00130018	0.0748137	0.00842431
Cdk17	0.454124	3.99138e-20			0.401148	7.59979e-13							0.414827	8.44625e-69	0.262357	2.84435e-42	0.37589	2.27892e-54	0.217608	8.37597e-45	0.199667	4.94501e-29			0.236331	3.25765e-11	0.348617	8.54618e-09	0.155063	0.00450753									0.205232	2.58995e-26
Cdk19													0.0583488	0.00193204					0.0931522	5.00809e-12	0.0717668	0.00222703																	0.0717568	0.0008116
Cdk2																			-0.0423346	0.00319884
Cdk20																					-0.0220559	2.61452e-05																	-0.0218748	7.22746e-05
Cdk2ap1					0.148886	0.0025199							0.0815814	0.00165225	-0.138022	2.1875e-11	-0.207535	2.5509e-12	-0.278322	1.0497e-66	-0.26992	4.97734e-38			-0.372326	4.14955e-15	-0.245663	0.0027853	-0.309656	7.717e-09									-0.238267	1.86701e-30
Cdk2ap2	-0.267473	0.000177057											-0.193268	3.46561e-14	-0.106863	2.89963e-07	-0.139639	3.58214e-07	-0.0552489	0.000606483																			-0.0689529	0.00680528
Cdk4	-0.389135	3.15596e-05											-0.341177	2.645e-32					-0.12506	6.90864e-17	-0.0724511	0.00072331			-0.126386	0.000394279
Cdk5rap2															0.0454275	0.00217793	0.0665385	0.002411
Cdk5rap3													-0.0930279	3.13673e-05
Cdk6															0.218886	2.47559e-18	0.126988	0.000904754			0.129494	4.87398e-07			0.218589	0.000516099													0.166697	1.5418e-10
Cdkn1a	0.3065	4.1516e-06	0.878604	3.25257e-16	0.419309	2.00286e-07							0.499823	1.1759e-62	0.357584	3.3847e-62	0.29578	1.42314e-38	0.508601	6.56635e-150	1.07668	0	0.600385	8.07466e-09	0.839982	8.6069e-61	0.341596	1.36913e-06	1.06046	2.45934e-53									0.781521	7.65045e-189
Cdkn1b																													-0.176205	0.00914381
Cdkn1c													0.147911	2.42349e-05					-0.0211859	0.00241058
Cdkn2aip															-0.0538883	0.000115017			-0.0521432	5.61697e-05
Cdkn2aipnl															0.10327	6.84913e-09	0.111587	4.96567e-06	0.0648621	0.000141926	0.0826657	0.000175493			0.131515	0.00311807													0.0802129	0.000112875
Cdkn2c																													-0.184522	0.00228395
Cdkn2d	0.286172	4.90777e-05	0.483766	1.64567e-05	0.232922	0.000343469							0.243445	1.39456e-23	0.141897	1.47757e-11	0.143523	9.45735e-07			0.183864	4.14946e-18			0.145654	0.00423326	0.195303	0.00128582											0.136391	1.36492e-09
Cdkn3																			-0.00265288	8.75154e-07	-0.0238864	0.00142178							-0.350939	1.60165e-07
Cdpf1													-0.0705346	6.26005e-07			-0.0609059	0.00290411	-0.0440729	2.31006e-05	-0.0592556	5.21711e-06																	-0.0595261	9.9106e-06
Cds2													0.0742368	1.00648e-06	0.0261943	0.00695523			0.0368262	0.000104083	0.0354092	0.00460813
Cdt1	-0.104392	3.4067e-08											-0.0653374	1.57145e-19					-0.0198358	0.000223007									0.163748	6.99224e-05
Cdv3													0.137687	2.26618e-05	0.0830041	0.000548612	0.140274	1.77667e-06
Cdyl																	0.0428	0.00625173
Cebpa															-0.0259589	0.00237502			0.0637141	9.37646e-09
Cebpb	1.96953	2.38988e-154	1.70197	1.84306e-54	1.70286	2.06137e-123							1.8628	0	1.32832	0	1.30907	0	1.06994	0	1.63122	0	1.36467	1.29684e-36	1.1876	3.26939e-107	1.48238	2.30562e-76	1.78723	1.58338e-133									1.46916	0
Cebpd													0.0541955	0.000113871					0.0541848	4.52663e-16
Cebpg													-0.082717	7.62688e-06	-0.117177	1.36334e-13	-0.110747	4.38372e-06	-0.206104	1.53687e-56	-0.194126	1.98265e-29			-0.140364	0.000339341			-0.188329	6.04062e-07									-0.144797	6.351e-18
Cebpz													0.0764823	0.00197749	0.113278	7.98571e-07	0.107266	4.68368e-05	0.0878458	2.00991e-06	0.113845	1.2953e-06							0.18689	0.00198406									0.0853929	0.000338992
Cebpzos															-0.0501004	0.00460613
Cela1													-0.0511465	0.000264933	-0.0593558	4.62017e-05			-0.0466801	3.92889e-05	-0.0381483	0.000908265																	-0.0400102	0.00594174
Celf2					0.259423	0.000287329							0.259811	1.1365e-18	0.0966912	1.60073e-05	0.109102	0.00021887	0.0631054	0.000368826
Cenpa													0.0577819	0.000464804	0.170426	8.7321e-13	0.214309	4.09187e-12	0.254224	4.54795e-24	0.378983	8.36392e-44			0.214125	3.96847e-12			-0.188353	0.00498135									0.304728	8.4301e-30
Cenpb					0.195941	0.00109726							0.182023	1.74596e-08	0.138659	6.9832e-13	0.127435	6.75628e-06	0.0924934	2.07629e-07	0.0973758	5.30534e-05					0.192638	0.00343248											0.12062	9.78344e-08
Cenpc1																			-0.0554994	0.000454782	-0.0980612	8.43038e-07							-0.24909	1.40112e-05									-0.0650372	0.00135479
Cenpe															-0.0159137	0.00220639			-0.101384	1.38108e-11	-0.0912544	1.58359e-06							-0.504006	3.434e-14									-0.0425767	1.14824e-06
Cenpf															0.053791	0.000210159	0.101112	7.44243e-05	0.0296712	0.00176142	-0.0454352	0.00470795							-0.442709	3.25542e-09									0.025421	0.000576382
Cenph																	0.102973	0.000705719
Cenpi																	0.0298347	0.00263328
Cenpk													-0.040391	8.05036e-11	0.0491992	0.00467174					-0.0462473	0.000438632																	0.00461419	0.00253049
Cenpl															-0.0325468	0.00111589			-0.0917271	3.00912e-16	-0.0928877	5.08158e-14							-0.348179	5.20483e-17									-0.0742872	3.11149e-11
Cenpm	-0.0542536	0.00158141											-0.0421649	2.62452e-15	0.0537246	0.00272052			-0.0864575	1.65691e-05	-0.0710553	1.13917e-05
Cenpn															0.0556799	6.21357e-09	0.052318	0.00616422
Cenpo													-0.0169978	0.00582896
Cenps	-0.0551626	0.00598608											-0.0430204	2.34873e-15					-0.113256	9.10163e-16	-0.0397042	0.000161299			-0.121005	0.00105555													-0.0169262	0.000708424
Cenpt																			-0.0633299	3.86556e-07
Cenpu													-0.0249975	0.00145557					-0.0128228	0.000649064
Cenpv													-0.111907	9.20814e-12					-0.0506825	0.000195094
Cenpw													0.0125609	0.0030516	0.105158	1.02627e-14	0.107523	7.584e-06	0.0705202	8.3859e-05																			0.0699804	0.000971551
Cenpx	-0.204396	0.00402025											-0.217018	1.24913e-15					-0.0815415	7.35116e-07	-0.0852984	8.03142e-05																	-0.0732575	0.00126369
Cep104																			0.0281171	0.000642861
Cep128																					-0.0189481	0.000794913																	-0.010773	0.00744129
Cep131													-0.024201	0.00483989
Cep152																			0.0225201	0.00046886
Cep162													-0.0370754	0.0014984			-0.057614	4.92822e-05	-0.040844	1.0268e-06	-0.0411674	0.00153203																	-0.0354241	0.00461488
Cep164																			0.0330067	1.57986e-05
Cep19					-0.146881	3.7698e-05							-0.126534	7.26946e-15	-0.11788	8.83832e-17	-0.121872	4.59951e-10	-0.0520039	1.87041e-07	-0.0850622	4.10823e-08			-0.11022	0.000325837	-0.150539	0.00508945											-0.114204	2.20163e-15
Cep250																	0.0653324	0.000422395	0.0360238	0.00908038
Cep57													-0.0817081	0.000393987
Cep57l1													-0.0995242	7.50165e-08	-0.0683323	0.000419216	-0.0780332	0.00905955	-0.0851427	4.0302e-08	-0.159157	5.43125e-17			-0.124644	0.00987344			-0.254167	4.81516e-08									-0.125428	6.99102e-11
Cep70																					-0.0605729	0.00050584							-0.130275	0.00721105									-0.0683227	6.15935e-05
Cep78													-0.0267635	0.00255495
Cep83													0.0973002	3.11626e-05
Cep89																			-0.0128237	0.000384089	-0.0442635	0.00195945							-0.15937	0.000851566
Cep95															-0.0367568	0.000266814			-0.0266766	0.00628041	-0.0460892	7.61326e-05																	-0.0399346	0.000392602
Cept1													-0.0824045	1.55245e-05	-0.091089	7.66422e-12	-0.0784966	0.000251298	-0.0764535	1.10587e-11	-0.0863095	3.09917e-08																	-0.0978067	2.26434e-11
Cerk					0.0381051	0.00730412							0.0741585	6.59158e-05	0.0637296	2.78244e-05			0.0796459	1.73682e-12	0.0725377	3.89512e-06																	0.0659969	2.91483e-05
Cers2	0.300442	8.51417e-05			0.170621	0.00676875							0.335967	1.62211e-37	0.131258	2.25665e-13	0.200827	2.33818e-16	0.0935345	1.07426e-08	0.189374	3.84069e-21			0.172974	0.000142652	0.191101	0.00127675											0.174993	5.63949e-19
Cetn3																			-0.0612054	2.93196e-05
Cfap20															-0.0967236	8.36145e-06	-0.131175	4.98518e-06	-0.106091	9.04281e-11	-0.110795	6.30338e-08																	-0.0837601	0.00011404
Cfap36															0.0395877	0.00619282
Cfap97															-0.0807037	1.4941e-05			-0.0846271	1.95939e-10	-0.128518	1.30253e-13			-0.152307	2.54876e-05													-0.10827	1.34008e-09
Cfdp1													-0.0898671	0.000800614					-0.0642779	0.000232807
Cfl1													-0.0926104	0.000119	-0.0611304	0.000131707			-0.0490701	0.000180755
Cfl2													0.153622	8.84733e-08							-0.0569131	0.00676015
Cflar															-0.0761766	8.0394e-05					-0.0524064	0.0098892																	-0.0648335	0.00129931
Cggbp1																					-0.0393295	0.00472679							-0.227704	0.00211411									-0.0655469	0.00578719
Chac2																			-0.0322932	1.54815e-06
Chaf1a	-0.0671159	0.000687968											-0.0464738	3.36971e-12					-0.0394724	5.51532e-05
Chaf1b	-0.157035	0.00325235											-0.153691	6.64619e-13					-0.0889907	5.47919e-08
Champ1																					-0.0374523	0.00690338
Chchd1													-0.165308	2.32161e-11					-0.0403831	0.00884159	-0.0866531	0.000195076
Chchd10					-0.167236	0.00190612							-0.102714	2.96693e-05					-0.0518033	0.00148878	-0.0621648	0.00163056																	-0.047067	0.00461349
Chchd2															-0.151079	6.43918e-25	-0.151979	3.21517e-14	-0.181407	1.43056e-57	-0.163611	5.1658e-26			-0.204551	4.70259e-13	-0.246259	8.92144e-06	-0.171607	6.98379e-08									-0.164131	7.22249e-27
Chchd3																			-0.0415732	0.00230366
Chchd4													-0.0776855	5.0039e-05	-0.0806833	3.3418e-05			-0.0513123	0.00496458	-0.108177	1.37392e-06																	-0.0874279	6.79973e-05
Chchd5																			-0.0644123	2.25149e-07	-0.0386367	0.00183657																	-0.0443765	0.00821621
Chchd6													-0.065261	0.000130381					-0.058215	0.000261765
Chchd7													-0.112012	7.92199e-07					-0.106109	4.59135e-11																			-0.0627726	0.00761628
Chd1													0.107015	1.56996e-05			0.0907642	0.00124092
Chd1l															0.0547858	0.000443242	0.07755	0.000378892	0.0401702	0.00157076																			0.0467311	0.00977562
Chd2															-0.0674317	0.00460529					0.0684137	0.00652294
Chd3os	-0.0489566	0.00645147											-0.0433304	2.8552e-07					-0.0741691	2.5372e-14
Chd4															0.102308	8.63983e-06	0.107519	0.000279768	0.070512	0.000253966
Chd6																			0.0190424	0.00686212
Chd7	0.208323	1.513e-06			0.248009	5.90015e-13							0.309558	2.65458e-62			0.0970486	9.8345e-17
Chd8																			0.0499561	0.00472546
Chd9															-0.13778	3.57107e-12			-0.0506362	0.00406927	-0.175126	2.94375e-16			-0.136459	0.00746107			-0.153528	0.00598304									-0.166103	1.72313e-15
Chek1																			-0.0849786	1.52592e-12	-0.0973787	3.20346e-09			-0.144954	0.00175878													-0.0662016	1.87987e-05
Chek2													-0.0534917	1.90015e-07	-0.0538249	2.42418e-05	-0.0759439	9.82468e-05	-0.103779	1.10927e-17	-0.0726243	2.48211e-07							-0.180783	3.17126e-05									-0.0614824	1.80591e-06
Cherp													-0.0188873	0.00122983
Chic2															-0.0696482	0.00119068
Chka	0.134037	0.000901981											0.127306	8.25029e-07	0.130117	9.92441e-11			0.11014	7.82039e-12	0.203998	6.83756e-27			0.208493	2.42191e-07			0.210109	8.6782e-06									0.178486	8.05579e-20
Chkb													0.0846663	2.08226e-06							0.0282368	0.000997623
Chm															0.033121	0.00943889
Chmp1b																					0.0716951	1.4011e-05
Chmp2a																			-0.0980061	6.46032e-10	-0.0700419	0.00271737
Chmp3																			-0.0485555	0.00216466	-0.0451817	0.00745228					-0.177585	0.00401822											-0.0578189	0.0021225
Chmp4b	0.25487	0.000105233			0.312707	8.30388e-06							0.277131	2.68435e-21			0.0747612	0.00177514
Chmp5															-0.110564	1.70002e-08	-0.0936082	0.000945705	-0.0928274	5.97778e-11
Chordc1													-0.112758	1.01999e-07	-0.103471	1.19306e-08	-0.110409	1.10055e-05	-0.105707	6.78897e-13	-0.108816	5.18379e-08			-0.126812	0.00499049													-0.114043	5.01591e-09
Chp1													0.122572	1.97766e-09	0.0547257	0.00177807	0.0819603	0.00031632	0.0582725	1.05259e-06
Chrnb1													0.0730887	1.34379e-05
Chst11															0.0568967	1.24252e-06			0.0408284	6.8324e-06	0.0554371	6.24816e-07																	0.053639	2.48305e-06
Chst12													-0.0927126	1.05605e-05	-0.0811516	2.21451e-06	-0.0906602	0.000548135	-0.0756893	4.20616e-08	-0.0912606	1.13634e-06																	-0.0777749	3.12323e-05
Chst15																			0.0341797	0.000434593
Chst2													-0.0359058	0.000650474
Chst7													-0.0319963	0.00183305
Chtop															0.0189362	0.00249112
Chuk													0.0336771	0.00270899
Churc1																			-0.0568995	0.000562828
Ciao1															-0.0760396	8.98968e-07	-0.0910386	2.72629e-05	-0.0804847	1.13099e-11	-0.0843996	1.71322e-07																	-0.0798303	1.88423e-07
Ciapin1													-0.0468973	0.001479
Cib1													-0.0844166	3.35936e-06	-0.0629468	0.000694641	-0.0979187	3.75055e-05	-0.0953402	2.94829e-11	-0.0699137	0.000191745																	-0.0669095	0.000322936
Cinp													-0.0523656	4.14879e-06
Cirbp	0.563246	2.69469e-16	0.622297	2.30099e-05	0.540858	2.34075e-21							0.6762	7.61404e-139	0.527994	1.37161e-168	0.494749	3.6194e-89	0.569987	1.88217e-259	0.603423	7.29136e-196			0.615173	5.77018e-51	0.427133	7.78135e-15	0.67667	1.6447e-40									0.549147	1.85598e-167
Cisd1													-0.177264	4.4049e-20	-0.0767276	0.000874661	-0.116127	0.000185931	-0.153217	1.32942e-18	-0.0700174	0.00177928																	-0.0731076	0.000306104
Cisd2													0.164136	3.88314e-09	0.0703855	0.0048665	0.203621	1.08345e-15
Cish	0.527478	4.32532e-15	0.511107	0.000670256	0.38989	1.15807e-09							0.452198	6.1882e-59	0.259596	1.31247e-50	0.306477	7.01676e-35	0.180473	4.91508e-51	0.267308	1.37933e-62			0.233029	2.20429e-17	0.507455	1.36124e-17	0.320154	7.11976e-19									0.276823	1.30416e-59
Cit																	0.0684705	0.0017396											-0.186979	0.00108711
Cited2	-0.514128	6.68327e-11	-0.740723	0.000151484	-0.481123	3.32163e-09							-0.556644	2.33722e-60	-0.345491	1.67388e-42	-0.471376	3.36179e-46	-0.365659	1.15726e-69	-0.28166	3.63213e-25			-0.222351	2.28283e-05	-0.409433	9.41811e-06	-0.407203	1.59776e-11									-0.3362	2.10997e-36
Ckap2																			-0.076489	1.90926e-08	-0.0844758	3.65331e-06							-0.304683	1.26298e-07									-0.0458522	0.00268513
Ckap2l															-0.000801202	6.82836e-06	0.0580823	1.89146e-07	-0.0654659	3.58738e-13	-0.029865	0.000246998							-0.335195	7.4538e-10									-0.0126352	3.75244e-05
Ckap4																					-0.150339	4.4575e-15			-0.169924	6.3706e-05													-0.107593	4.99256e-09
Ckap5																			0.0602587	0.00624912									-0.30523	1.73935e-06
Ckb															-0.0255907	0.00010526
Cklf													-0.0739012	6.15532e-05	-0.0881267	1.18981e-07			-0.0908656	1.20847e-11	-0.166021	7.65892e-20			-0.192143	2.55566e-07			-0.165693	0.000559753									-0.125746	1.56723e-13
Cks1b													-0.172305	1.03861e-24	0.0565824	0.00311088													-0.142392	0.00302247
Cks2													-0.12864	2.43317e-15					-0.088066	0.000438746	-0.0178061	0.000904542							-0.573136	3.70406e-34
Clasp1													0.0110671	0.00615724	-0.0401436	0.00390531
Clasp2																			0.0293824	0.00713367	0.0421286	0.00744809
Clasrp															0.0435389	0.00894263	0.0589987	0.00750531	0.0644208	1.42055e-08	0.0645419	2.55315e-05																	0.0478854	0.00227598
Clcc1																			-0.0450524	4.15489e-06
Clcf1															0.0324226	0.00436844			0.0553403	1.38525e-13	0.106748	1.23584e-15							0.153933	3.52515e-07									0.081497	5.58919e-11
Clcn3													0.151819	1.24701e-10	0.0674618	0.00108834	0.12528	3.6677e-07	0.046861	0.000134558	0.0703798	0.000295309																	0.0691173	0.00112812
Clcn4																			-0.012774	0.00713169
Clcn5													0.035357	0.000287046					0.0135166	0.0094894
Cldnd1													0.0718905	0.0096226
Clec11a																	0.0246915	0.00749819
Clec12a																			0.153921	8.13037e-25																			0.0496753	0.00599765
Clec1a					0.224935	9.44312e-05							0.176246	2.33579e-13
Clec2d	-0.58192	4.32532e-15	-0.587221	0.00513622	-0.270514	0.00032712							-0.529501	5.06823e-68	-0.291689	8.43354e-69	-0.420771	2.31125e-69	-0.260609	2.89013e-78	-0.296997	2.92304e-63			-0.23226	8.21208e-13	-0.315042	1.63822e-06	-0.251107	3.48949e-12									-0.320646	2.24353e-78
Clec4d															0.0285047	0.00599105					0.0794301	3.10032e-12			0.0910085	0.000136751													0.0666208	6.8857e-09
Clec4e															0.0653063	2.29569e-07	0.0633408	2.45742e-06	0.112106	4.71337e-16	0.122726	4.7118e-14			0.143859	4.46244e-05													0.106433	1.16243e-12
Clic1													-0.0646294	0.000762321	-0.034454	0.00750633
Clic4																	0.10388	6.20609e-05	0.0693013	1.42584e-05
Clint1					0.214438	0.0096095							0.151338	6.45689e-07
Clip1													0.0921839	0.000150796					0.0367904	0.000556508
Clip2																	0.0393488	0.00142656
Clk1													0.195372	9.63312e-08					0.129551	8.90745e-12	0.342221	3.41609e-59			0.280683	2.48274e-07			0.366274	2.90237e-12									0.193222	2.42944e-15
Clk3			-0.0273831	0.000870113
Clk4															-0.0752346	1.8929e-07			-0.0428665	0.00478373
Cln3																					-0.0405912	0.00239518
Cln5															-0.0615534	3.05454e-05	-0.0549349	0.00290823
Cln6													-0.0569921	0.00584174
Cln8																			-0.0228102	0.000164945
Clns1a																					0.0583318	0.000938735
Clpb																			-0.035828	0.00648308
Clpp													-0.121977	1.21057e-07					-0.0610252	0.000161231
Clptm1																									0.114637	0.00972451
Clpx																			-0.0378459	0.00948278
Clspn													-0.0287515	3.41357e-08	0.065237	3.57879e-06	0.118323	2.41308e-05
Clta													-0.0702261	0.00635757	-0.0935448	2.69009e-07	-0.0943153	0.000289864	-0.0247342	0.00852334	-0.0923471	1.14082e-06					-0.178393	0.00779561											-0.0944822	8.7378e-08
Cltc	0.283939	2.89393e-05											0.257055	2.11595e-24	0.107412	1.40274e-07	0.198866	9.47342e-16	0.0899222	2.78232e-07	0.10731	3.62749e-07			0.153311	0.000360404													0.126306	8.4696e-10
Cluap1													-0.10047	4.39989e-11	-0.116574	2.11092e-18	-0.106238	9.89823e-08	-0.09117	1.50577e-16	-0.103695	4.9444e-12																	-0.0878074	4.89683e-10
Clybl																					0.00984716	0.00896528
Cmas					0.190903	8.57641e-05							0.119994	6.44069e-05							0.107748	8.19093e-06
Cmc2													-0.0917689	6.54418e-12					-0.0803455	4.53106e-10	-0.0516382	0.00571189
Cmip	0.22488	1.12085e-05			0.214073	8.33985e-05							0.231124	1.4222e-30	0.171846	8.2672e-26	0.206054	6.85714e-25	0.188711	5.46609e-45	0.173602	4.90882e-29			0.102479	0.000373285	0.219151	0.00028571	0.152672	6.96301e-05									0.172012	3.21279e-27
Cmpk2																					-0.0362088	0.000708661																	-0.0372231	6.52847e-05
Cmss1													-0.0727751	3.58783e-05
Cmtm3															-0.0519145	0.000293417			-0.0641881	1.83986e-09	-0.0428129	0.00759535
Cmtm6													0.0970176	6.72197e-05					0.0377235	0.00910063
Cmtm7													-0.386206	3.2156e-25	-0.241511	4.76957e-45	-0.173344	8.39445e-12	-0.13245	3.02954e-20	-0.201831	4.51294e-29			-0.178832	4.80501e-07	-0.40259	8.35059e-10	-0.200021	4.43561e-09									-0.197518	3.1841e-26
Cmtm8																			-0.0274483	0.000918577
Cnbp	0.240852	1.91561e-05			0.27582	5.5008e-07							0.242873	9.16905e-26	0.230259	3.17676e-51	0.29494	6.1987e-48	0.181845	4.19464e-42	0.281438	1.07454e-58			0.21622	1.95868e-15			0.335604	7.15573e-20									0.263259	5.82093e-57
Cnep1r1													-0.0438013	0.00896887	-0.0697353	2.55121e-11			-0.081636	2.27575e-14	-0.0807303	2.41201e-09							-0.134939	0.000600539									-0.0750162	6.70419e-09
Cnih4													-0.118788	9.77528e-08					-0.0656817	0.000353763	-0.0593242	0.00109451
Cnn3															0.0836911	1.24794e-16			0.151439	2.87479e-34	0.191061	3.81222e-19			0.102886	0.00277276	0.143977	0.000455565	0.202618	0.000540048									0.17373	1.20704e-17
Cnnm2															0.103212	1.12474e-33	0.0885954	9.35314e-18	0.155622	4.47427e-82	0.147461	2.34854e-44			0.0994294	3.73879e-09			0.130287	2.51177e-08									0.134045	1.36177e-41
Cnot1															0.07293	0.00191288	0.131315	1.50116e-07	0.0944929	9.56103e-08	0.132991	1.91791e-09			0.184941	0.000491699													0.105307	4.57493e-06
Cnot10															0.0536322	0.00479238			0.0466985	0.00307108	0.0847895	2.86756e-07			0.120203	0.00460291													0.0629705	0.000260332
Cnot2																			-0.0532084	0.000909988	-0.0651537	0.00531792			-0.140341	0.00461338
Cnot3																					-0.0676348	0.000236249
Cnot4															-0.0431776	0.00509531	-0.0949028	0.000221122	-0.106307	9.46674e-14	-0.127507	1.8503e-11																	-0.109452	6.37552e-09
Cnot7													0.111048	0.000125662	0.105349	5.67473e-08			0.0636151	4.58939e-05																			0.0421972	0.00811394
Cnot9															0.0364586	0.00459675	0.0433252	0.00989189			0.0507192	0.00619975
Cnp													-0.0983144	4.06208e-06					-0.0577632	9.26684e-06
Cnppd1																					0.0766143	6.57351e-05
Cnpy2	-0.362585	6.93209e-05			-0.38413	5.70519e-08							-0.34163	5.61045e-31	-0.192539	1.53452e-20	-0.154871	1.42333e-08	-0.141298	3.2157e-19	-0.188446	1.5519e-19							-0.225789	0.00107744									-0.188449	8.02215e-21
Cnpy3															-0.0622253	0.00660481
Cntd1																			-0.0200703	0.0094422
Cntln													-0.060986	0.000363264
Cntrl																					-0.101021	5.805e-05
Coa3	-0.336919	4.98643e-06											-0.286742	7.80335e-29	-0.199005	1.15208e-22	-0.200434	1.6994e-13	-0.198368	1.25604e-37	-0.164104	1.27033e-14			-0.15777	0.00371214													-0.16746	1.68308e-16
Coa4													-0.0704135	3.88657e-10	-0.0718501	1.95801e-14	-0.0713519	2.55382e-07	-0.0982063	9.63314e-32	-0.076051	1.41408e-12							-0.084588	3.6973e-05									-0.0774309	2.72451e-16
Coa6	-0.133205	0.00322802			-0.132282	0.000978708							-0.130329	1.24386e-16	-0.0948705	2.81228e-11	-0.0987442	2.14994e-06	-0.109181	5.18841e-18	-0.122572	2.39016e-15							-0.127031	0.00266986									-0.126111	7.52375e-17
Coa7													-0.0525582	0.000178758					-0.0351266	0.000993284
Coasy													-0.0660928	0.000310316			-0.0627787	0.00029558
Cobll1															0.0476929	0.0014127
Cog4															-0.0418468	0.00206199			-0.0411913	0.000423225	-0.0636775	8.34143e-06																	-0.0504835	0.000569964
Cog5													0.0510744	0.00581273
Cog6													0.0689192	2.19663e-05			0.079752	2.37011e-06
Cog8													-0.108946	2.08551e-09	-0.135092	2.01257e-18	-0.127861	3.19826e-09	-0.153286	1.84173e-33	-0.127735	3.79348e-15			-0.1486	5.41465e-05													-0.135874	5.09735e-18
Coil															-0.0397054	0.000272532			-0.0335804	0.00155904																			-0.0362255	0.00446164
Col4a1					0.0732498	0.000391782							0.0666773	0.000233026
Commd1													-0.097027	2.7281e-05					-0.0697676	8.01352e-07	0.0208348	0.00441781
Commd2															-0.0744602	9.8968e-05	-0.0785647	0.00957537	-0.114777	9.84069e-15	-0.0844519	2.4903e-05																	-0.094394	1.26754e-06
Commd3													-0.232388	2.87134e-18	-0.162195	2.80085e-15	-0.129736	3.04469e-05	-0.14626	9.75316e-20	-0.100671	3.29038e-06			-0.197611	1.5885e-05													-0.109121	1.28693e-07
Commd4													-0.0874201	0.000658702
Commd6													-0.0862034	0.00034717	-0.0553583	0.00953899			-0.0609849	2.56807e-05	-0.0866995	2.277e-05																	-0.0821074	2.64584e-05
Commd7													-0.111341	2.66106e-06	-0.0976252	2.8237e-05			-0.129105	2.16575e-17	-0.119174	1.14199e-08																	-0.117272	5.45994e-08
Commd9													-0.0926428	1.24379e-08	-0.0691555	1.36071e-06	-0.0933455	3.94633e-06	-0.067693	3.49808e-09	-0.0724548	1.66705e-06			-0.089638	0.00598287													-0.0840703	5.63561e-09
Comt													-0.139403	2.59941e-07	-0.0945804	0.000105625	-0.0838523	0.00726062	-0.0597039	0.0019915	-0.119866	2.31129e-07																	-0.0990919	2.67591e-05
Comtd1													-0.0696953	2.89972e-05	-0.0615103	0.000213711	-0.0925101	0.000127893	-0.0971784	2.41279e-14	-0.083768	2.61385e-07																	-0.0877834	3.89504e-08
Copa															0.0619176	0.00970877			0.0742295	1.42584e-05	0.0918716	1.88069e-05							0.186441	0.00137492									0.0685393	0.00216894
Copb1													0.09931	0.00276531			0.0869639	0.00691295	0.0515231	0.00667305
Cope													-0.105859	0.000836955	-0.0913681	9.54893e-05			-0.0849395	6.04426e-07
Copg1																					0.0439606	0.00330901
Coprs													-0.0337292	0.00110904					-0.0234605	0.00134959																			-0.0249054	0.00122135
Cops3													-0.139726	5.9676e-09					-0.0784343	2.42221e-06
Cops4																			-0.107008	9.19475e-11	-0.0665283	0.006575
Cops5													-0.0927092	0.000101157
Cops6													-0.145883	9.90132e-10					-0.0720887	6.05104e-05
Cops7a															-0.0981528	2.16032e-07	-0.135155	7.14385e-07	-0.114272	2.77672e-14	-0.119576	5.13089e-09																	-0.120318	1.65095e-10
Cops9																					0.066992	0.000472668
Copz2															-0.0246235	0.00357619
Coq10b													-0.0977886	0.00144825	-0.0879485	0.000174208	-0.0984881	0.00142861			0.234025	2.68251e-41			0.141187	0.000535375			0.224619	1.97855e-05									0.105761	2.63024e-07
Coq2																			-0.0454476	1.46749e-05
Coq3																			-0.0469241	9.79356e-10
Coq4													-0.0411006	0.00958932	-0.0467791	9.18484e-05	-0.0582524	0.00682912
Coq5															-0.0606391	0.00141403			-0.0715555	3.30124e-07																			-0.0631383	0.00104835
Coq6																					-0.0304308	0.00264931
Coq7															0.058941	0.00016423	0.071775	0.00764101
Coq8a													-0.0942155	0.00185885			-0.0994338	2.673e-05
Coq9			-0.150055	0.00022016									-0.0595051	0.00270024					0.0449664	0.00319884	0.0282968	0.000111399																	0.0280295	0.00237105
Coro1a													-0.256687	1.54013e-15	-0.1441	6.17803e-18	-0.092227	0.000671678			-0.0597731	0.000320049			-0.136209	0.00171706													-0.0816392	6.85203e-05
Coro1c															0.0790942	1.091e-06			0.0765796	6.14707e-07	0.0856673	1.65797e-05																	0.0970483	3.24912e-07
Coro2a															0.140831	5.95897e-11	0.109642	6.07981e-05	0.0792036	3.0515e-06
Coro7															0.0766677	0.000135959			0.105771	2.21288e-11																			0.0706257	0.00572458
Cotl1					0.0886158	0.00721851
Cox10																			0.032017	0.00306327
Cox14													-0.156433	4.43086e-06					-0.0685616	8.79778e-05	-0.0629073	0.00747901																	-0.0556889	0.00518146
Cox16																			0.0202933	0.00898567	0.0253566	0.00565041
Cox18													-0.0332622	0.00348616
Cox19													-0.0980982	2.45405e-08	-0.0852474	8.38052e-08	-0.0917429	0.000277386	-0.0867202	5.77976e-10	-0.107963	5.96744e-10																	-0.0909412	1.03263e-07
Cox20															-0.0530879	0.00419506			-0.0712209	2.43499e-06
Cox4i1					-0.168234	0.0050154							-0.128894	3.67178e-09	-0.0603956	9.29265e-05	-0.0629694	0.00426017	-0.0377397	0.00333346	-0.0507552	0.00266253
Cox4i2													-0.0445065	0.000290609					-0.0151476	0.00588361
Cox5a													-0.154006	1.12935e-16	0.0584658	0.0042104	0.0706893	0.00720709
Cox5b													-0.110527	4.62991e-06							0.0640171	0.00191103
Cox6a1													-0.111298	6.91145e-05
Cox6b2													-0.0545193	0.00273652
Cox6c																	0.0485674	0.00438963	0.0394884	0.00584833
Cox7a2															0.0856497	0.000144006	0.0980319	0.00132347			0.0736338	0.000829084			0.150413	0.00407457													0.0738863	0.000916938
Cox7a2l															-0.201946	4.38193e-34	-0.103075	2.66635e-05	-0.0489127	0.00373136	-0.133367	3.69688e-11			-0.135294	0.00608408													-0.145676	5.59813e-15
Cox7b	-0.404252	0.000463862											-0.276066	2.07257e-16	-0.0854069	3.24351e-05			-0.0857283	1.77087e-08
Cox7c	0.213166	0.00989313											0.101439	0.00255078	0.0646604	0.00114899	0.0736936	0.00909818	0.0580548	0.000268527	0.0697769	0.0012533																	0.066576	0.00237659
Cox8a															-0.0480269	0.00496023			-0.0851136	1.2734e-09	-0.0980371	2.73134e-08																	-0.0813999	1.19488e-05
Cpa3																			0.151977	6.7648e-19
Cpd																					0.0306925	0.00310987																	0.0298675	0.0070437
Cpne2													-0.139241	4.46303e-07			-0.115787	0.000148412	-0.0781135	3.90924e-06	-0.0957732	0.000106086																	-0.0779604	0.00277993
Cpox													-0.0761961	1.47436e-06	-0.0416899	0.000351897	-0.0604496	0.00258424
Cpped1																					0.0342485	0.00286822
Cpq																			-0.0335587	6.99512e-06
Cpsf1															0.0635212	9.49617e-07	0.0570345	0.00801514	0.0513291	5.80509e-05
Cpsf2													-0.0834147	7.97383e-05					-0.0671157	0.000206781
Cpsf3																			-0.0536277	0.000571314
Cpsf6																					-0.0885643	5.75167e-05																	-0.0614577	0.00759653
Cpsf7																					0.0484256	0.00294562																	0.0450266	0.00530452
Cpt2															-0.0491222	0.00015602	-0.0469355	0.000519711	-0.0689263	4.60238e-13	-0.0347453	0.00371856																	-0.0442576	0.00051539
Cptp															-0.0334434	5.55844e-05	-0.0328488	0.00942844	-0.0395623	4.74713e-09	-0.0251119	0.000102176																	-0.0324742	0.000103107
Cpxm1																			-0.0333362	3.76833e-07
Cr1l																			-0.0506243	0.00928425																			-0.0765058	0.0015107
Cracr2a															0.0239099	0.00102333					0.0266553	0.00233589							0.028409	0.000895029									0.0255342	0.00346609
Crcp																			-0.0585447	1.08141e-06
Creb1					-0.113952	0.00315585							-0.0794074	7.04172e-05	-0.0666328	0.000810727					-0.0933728	2.9642e-06																	-0.0800122	8.29851e-05
Creb3															-0.0463508	1.98748e-06	-0.0504471	0.000280056	-0.0249036	0.00414395	-0.0361069	0.00083645																	-0.0393071	0.000121213
Creb5													0.0185761	0.000361167
Crebbp													0.102837	0.0013682					0.0912103	1.03596e-08	0.0453834	0.00377001
Crebl2																					-0.0230335	0.00665045
Crebrf																			0.0539299	8.28856e-05
Crebzf															-0.110264	1.47256e-08			-0.0723921	9.11863e-07	-0.0973839	5.65375e-07																	-0.0933235	1.68209e-06
Creg1													-0.148834	1.6752e-08	-0.198688	6.69082e-24	-0.227745	1.25838e-18	-0.21327	8.38888e-38	-0.190828	1.4738e-16			-0.197294	0.00120941	-0.18144	0.00434469	-0.221439	0.000398394									-0.192508	9.29352e-19
Crem	0.333215	1.54454e-26			0.317695	8.86697e-23							0.34028	7.30764e-117	0.184669	8.28349e-79	0.205457	1.59089e-63	0.148716	1.47092e-66	0.234009	1.0684e-70	0.2509	0.000118495	0.143414	8.97572e-13	0.288572	1.13774e-09	0.207697	9.53033e-13									0.217413	3.56025e-70
Crim1					0.12634	9.11185e-05							0.139703	1.71904e-15	0.0373942	0.00549417	0.0647809	0.000259388			0.0306897	0.00786217
Crip1													-0.127498	9.55355e-05	0.101439	8.72712e-06	0.122561	0.0002046	0.0918842	2.90737e-06	0.0766581	0.00182378																	0.0926462	0.000146806
Cript																					0.0879173	0.000134119
Crk													0.110544	2.08371e-07			0.111126	2.19478e-07	0.0715364	1.49247e-08
Crlf3													-0.085487	0.00667796	-0.163532	8.00554e-14	-0.190497	1.35137e-11	-0.144695	6.86149e-23	-0.163718	1.19508e-12							-0.227114	0.000997056									-0.152162	1.63727e-11
Crls1																			-0.0606509	9.53534e-07																			-0.038304	0.00685252
Crnkl1																			-0.0505025	0.00014713	-0.0630413	0.0011834																	-0.057015	0.00211425
Crot																	-0.0623737	0.00616585	-0.0734851	7.37419e-09	-0.0424687	0.00859983
Crtc2																			0.0275077	0.00305637
Crtc3													0.117259	5.14539e-06	0.0666654	0.000277081	0.0651065	0.00739015	0.0534743	0.000402075
Cry2																			0.0401481	6.46774e-06
Cryz																			-0.0246842	3.79378e-05
Cryzl2																																							-0.0566824	0.000165
Csde1													0.17068	1.75238e-07			0.0662328	0.00624535			0.0720959	0.00327625
Csf1																			0.0349145	5.30135e-08
Csf2rb															0.029598	0.00844367			0.0983277	1.2828e-20
Csf2rb2																			0.0216394	1.00222e-07
Csgalnact2															0.0543991	8.25913e-06	0.0529055	4.77776e-05	0.0836262	2.0398e-10																			0.0444068	0.00693068
Csk													-0.0612677	0.00170563
Csnk1a1	0.250658	0.00773453			0.193906	0.00373869							0.175387	5.25555e-10	0.0824713	1.13397e-05	0.178946	1.19406e-12	0.115437	1.60976e-13	0.135655	9.70141e-12			0.121456	0.0075147			0.213316	0.00482636									0.131857	2.73308e-11
Csnk1d																			0.0769921	1.44576e-06	0.0833799	2.06656e-05																	0.0715598	0.000792238
Csnk1e													0.180173	9.74969e-10	0.0671356	0.00833058	0.149303	1.78116e-07			0.125588	1.60806e-09																	0.0945653	1.45107e-05
Csnk1g1																	0.00635507	0.00965836
Csnk1g2													0.114576	0.000680242	0.0682289	0.0053924	0.0849127	0.00630173			0.053195	0.00736336																	0.0641131	0.00837494
Csnk2a1	0.17011	0.00773453			0.190865	0.00339453							0.138948	3.9726e-08
Csnk2b													-0.111712	3.99638e-06							-0.0680155	0.00837349																	-0.0751541	0.00233777
Cspp1																					-0.102312	2.3267e-07							-0.172459	0.00176399									-0.0742879	0.000250835
Csrnp1			0.333182	0.00318477									0.12998	1.05904e-08					0.0439383	0.000505626	0.0725385	2.14888e-05
Csrp1													-0.0956637	8.35568e-05	0.0841004	6.24831e-07	0.117156	0.000233728			0.0700915	0.00838312																	0.108177	1.15608e-05
Cst3													-0.0935968	0.000123575	-0.127983	1.94315e-12																							-0.070697	0.00127806
Cst7																			0.110418	2.23623e-15
Cstf3																					-0.0474461	0.000733012
Ctbp1													-0.0972931	0.00595475							0.0943086	1.03845e-06			0.0873348	0.00463513													0.080107	9.56907e-05
Ctc1													-0.0590541	3.19106e-05					0.0400807	0.00928981	0.0643987	0.00201377
Ctdp1																			0.0318325	0.000789902					0.0693224	0.005442
Ctla2a	1.67099	6.51953e-75	1.04305	4.69673e-08	1.10426	1.30091e-35							1.31955	2.2444e-240	1.02184	0	1.10484	1.26795e-242	0.744327	8.96762e-256	1.19642	0	0.951705	2.82562e-17	1.02587	7.08982e-84	0.846619	3.98566e-27	1.01184	8.81572e-76									1.082	0
Ctla2b	0.34289	6.31167e-21			0.240808	1.79053e-10							0.274268	1.00753e-59	0.219856	2.08342e-53	0.237225	3.06745e-44	0.127574	1.33172e-41	0.168807	1.93104e-55			0.113932	9.92692e-07	0.274616	3.26166e-07	0.142968	3.54017e-12									0.179012	3.67896e-46
Ctnna1															0.0636515	0.000273058			0.0445106	0.00422838
Ctnnb1					0.17966	0.00472754							0.0863075	0.00668288	0.0883945	5.41515e-05	0.0823161	0.000701341	0.0408851	0.0019915	0.110919	2.94223e-07																	0.0933429	5.23297e-05
Ctnnbip1															0.0427526	0.00096659
Ctnnbl1													-0.0382688	9.11302e-06							0.0700025	0.00176087
Ctps																			-0.0431672	0.00870909
Ctps2													-0.0482828	0.0058664					-0.0413371	0.00611663
Ctr9																			-0.0558016	0.000533101	-0.156215	2.39251e-12							-0.196718	0.00109528									-0.11864	9.16489e-09
Ctsb													0.113166	0.00111104
Ctse													0.0256794	0.0064485					0.0238219	9.19911e-05	0.0230917	0.00184183
Ctsf																	-0.0696754	0.000241423
Ctsg																			0.279026	9.14113e-27	0.0828366	5.01635e-05																	0.0769394	1.2469e-05
Ctsh													0.0628803	0.00710289	-0.0500531	0.00702669	-0.0593836	0.00811739
Ctsl													0.192779	2.72704e-10	-0.0771886	6.48858e-05	-0.0874629	0.0013018	-0.0369374	0.00241378																			-0.0562614	0.00136114
Ctss															-0.060647	0.000222972
Ctsw																					-0.0392142	0.0016049
Ctsz													-0.14597	8.29706e-08
Cttn																	0.0595013	0.00254662
Ctu1													-0.0277215	0.0055607
Cuedc2													-0.170248	9.96708e-09					-0.0564229	2.41412e-06
Cul1													0.0987649	0.0065671			0.109236	7.67348e-05
Cul3													0.0997431	0.00276795
Cuta													-0.19393	1.16261e-13			-0.108091	0.000498765	-0.114299	1.31147e-13	-0.0795374	0.000987804
Cutc													-0.0752304	2.5796e-06					-0.039948	0.00198397
Cux1															0.0673437	0.00140139
Cwc15													-0.104814	0.000811426	-0.0786942	0.000124217	-0.126686	5.39264e-05
Cwc25													0.0668887	0.000555837					0.0261876	0.00341664	0.0531801	0.000669388
Cwc27															-0.0420503	0.00424681			-0.0626467	5.68646e-06	-0.0677999	0.000482313
Cwf19l2													0.0808928	0.00475547
Cx3cl1													0.0505895	1.85097e-06
Cxcl2																			0.0708709	5.6129e-05
Cxcr4															0.0558209	4.48498e-06			0.0809235	2.52333e-11																			0.0540047	0.006266
Cxxc5																	0.0889635	0.000859576
Cyb561d2													-0.0578388	0.000108657	-0.0525109	0.000549798			-0.0626127	1.53622e-07	-0.0828751	4.48597e-09																	-0.0607608	1.80003e-05
Cyb5a	0.0661263	0.000861162											0.0646369	3.51354e-07
Cyb5b																					-0.0261247	0.00246328
Cyb5r1													-0.0492388	0.00161549
Cyba													-0.110533	5.89258e-05	-0.0687486	0.00089829									-0.154225	0.00874595
Cyc1													-0.107853	6.93627e-05					-0.100347	6.38763e-10
Cycs																			-0.0780932	3.3713e-08
Cyfip2													0.0807686	0.00647412	0.204478	5.02786e-24	0.186253	3.15908e-14	0.188658	1.03484e-33	0.200869	3.43526e-23			0.135995	0.000364632			0.224237	0.000237835									0.19766	1.19129e-22
Cyhr1																			-0.0261199	0.000347352
Cyld																			0.0451813	0.00743363
Cyp11a1																			0.151555	1.70775e-36
Cyp26b1													0.0977304	3.19813e-06
Cyp2j6																	-0.0622608	0.00991218
Cyp2j9															-0.0596755	1.19329e-06
Cyp7b1																	-0.035149	0.00609391	-0.0220237	9.34802e-05
Cyth1					0.147379	0.00101193							0.124521	6.58202e-14	0.117728	2.61727e-19	0.118138	6.86356e-12	0.128108	1.16491e-31	0.183415	3.10284e-30	0.303072	0.00194732	0.115219	1.21471e-05			0.16108	6.27279e-06									0.17291	2.51952e-30
Cyth2															-0.056446	0.00172681			-0.0642044	2.97981e-06	-0.0801578	1.35592e-06							-0.157664	0.000656036									-0.0713707	4.38509e-05
Cyth3													0.105147	1.1465e-08
Cyth4															-0.0616456	0.00683845											0.200693	0.00684901
Cytip	0.772927	4.24143e-51	0.49488	0.000173434	0.708946	3.51363e-53							0.619736	8.5809e-159	0.773163	5.53021e-286	0.570355	4.04886e-132	0.670732	5.66339e-300	0.901965	0	0.749633	4.48434e-28	0.689065	4.43e-60	0.660328	2.20021e-30	0.853808	3.193e-60									0.830191	1.64191e-287
D030056L22Rik					-0.137689	0.00132517							-0.126642	4.22878e-14	-0.104336	8.09153e-10	-0.115313	1.35235e-06	-0.16439	2.56181e-32	-0.164876	2.4132e-20							-0.332373	1.54669e-13									-0.141076	8.8459e-17
D10Jhu81e													-0.0691354	0.00499217	-0.0518992	0.00521281	-0.0976404	0.000466205	-0.105973	3.22751e-12
D11Wsu47e													-0.0247021	0.00735629	-0.0381744	1.04155e-05			-0.0379383	7.03796e-08																			-0.0368389	0.000108589
D130040H23Rik	-0.00577916	0.00231833
D16Ertd472e																					-0.0813737	3.85487e-05																	-0.056862	0.00747968
D17Wsu92e															0.0521195	0.00467361					0.0510277	0.00607649																	0.0607335	0.000919349
D3Ertd254e					0.0678005	0.00109635													-0.0270624	3.2054e-05
D5Ertd579e															0.0621588	0.000119437
D5Ertd605e															0.0988679	6.51743e-14			0.0930584	3.61631e-18	0.0541986	0.0091622																	0.0645558	0.000626425
D630039A03Rik																	-0.0303566	0.00555585
D6Wsu163e													-0.0370734	0.00100898	-0.0261792	0.00158809	-0.0433989	0.0013009	-0.0432287	1.82826e-07	-0.0544376	5.75189e-06							-0.0785759	0.00266745									-0.0431236	9.69097e-05
D8Ertd738e													0.243925	9.1779e-15	0.179056	2.01257e-18	0.165949	1.66541e-13	0.213894	1.82381e-46	0.290696	6.51572e-53			0.161309	0.000155786			0.22924	1.88785e-08									0.211506	1.78664e-27
D930016D06Rik													0.0171772	0.00446993
Dab2ip													-0.0242013	0.00270606
Dach1																	0.0805458	0.00366879
Dad1																					-0.0683221	5.75167e-05
Dand5															-0.0331032	4.33211e-05			-0.023481	2.16809e-06
Dap																			0.0481749	7.70061e-05
Dap3													-0.067446	0.00711761
Dapp1	-0.314375	0.00171915	-0.451231	0.00445907	-0.335487	0.000232869							-0.498888	2.05993e-49	-0.372753	1.12898e-71	-0.341842	4.56881e-36	-0.304921	4.10111e-66	-0.299287	2.64268e-36			-0.231268	6.50973e-06	-0.295789	4.5662e-06	-0.299439	8.91355e-07									-0.329101	1.32147e-47
Dars2			0.00420448	0.00513622									-0.032835	0.00124096
Dazap1													0.112884	0.000362609	0.141986	6.43479e-11	0.159361	4.87816e-08	0.0938795	3.30997e-08	0.107721	2.08366e-07			0.180118	0.00260616													0.1265	4.37457e-10
Dazap2	0.329185	1.45277e-05			0.397539	2.37098e-08							0.379812	4.39857e-39	0.215075	1.33141e-25	0.202868	2.84006e-15	0.198083	2.68174e-36	0.23052	1.04657e-34	0.308841	0.0099009	0.198702	2.41102e-05			0.286441	3.27707e-06									0.203566	2.80449e-27
Dbf4													0.034996	0.00209633	0.0555525	0.00226041			0.0400154	0.00366513
Dbi													-0.190196	3.39187e-11
Dbp													-0.06401	0.000255246	-0.0716351	1.40638e-09	-0.0806439	3.58753e-07	-0.0353623	0.000231469	-0.0424695	0.00184989																	-0.0589321	6.1001e-06
Dcaf1															0.0371144	0.000639875
Dcaf10													0.0450606	0.0011877
Dcaf11																	0.0516368	0.00487584
Dcaf12													-0.0396076	0.00549759
Dcaf13																			-0.0492023	0.000233164
Dcaf5																	0.0476523	0.00377699	0.0361784	0.00068726
Dcaf7															0.0783997	3.06064e-06	0.0670878	0.00022076	0.0968725	1.4903e-11	0.116954	2.76581e-10			0.118797	0.00531221			0.158753	0.00122421									0.1122	1.85376e-09
Dcaf8																			-0.00699942	0.00158333
Dcakd															-0.0513481	0.000606759			-0.0561778	9.26401e-06
Dck			0.0566966	0.00136104									-0.0274767	0.00254519
Dclre1a																			-0.0334208	8.29355e-07
Dcp2															0.0426493	0.000787728	0.0539564	0.00839755
Dcps													-0.146666	8.41769e-10
Dctd													-0.129292	5.6088e-09					-0.08578	6.75809e-09	-0.0666598	0.00188939																	-0.0616739	0.00397545
Dctn1																					0.0271221	0.00807017
Dctn3													-0.0930538	0.000470185
Dctn4													0.104688	0.00074669							0.0696041	0.0012765
Dctpp1	-0.379722	3.81933e-08			-0.180108	0.00171549							-0.320585	1.565e-45					-0.157466	1.25449e-17	-0.0833561	0.000104197
Dcun1d1															-0.131226	5.33618e-11					-0.139744	1.00539e-09																	-0.157798	1.5074e-13
Dcun1d2													-0.0358137	0.00170528			-0.0423685	0.00369176	-0.0303546	6.4644e-05	-0.0429848	1.82446e-05																	-0.0392541	0.000124277
Dcun1d5																			0.0774118	1.71633e-05
Dcxr																					0.0313092	0.00366848
Dda1																	0.0736608	0.00483466			0.0854019	2.63397e-05																	0.0745031	0.000354626
Ddah2															-0.101574	5.80065e-06	-0.101986	0.000298249	-0.0869634	2.6662e-07																			-0.0725375	0.00239327
Ddb1															0.0891532	5.35736e-05	0.0885761	0.00565439	0.0711116	6.23834e-06	0.11855	2.48996e-07																	0.123508	5.3527e-08
Ddhd1													0.0535509	0.000683677	0.057956	4.48498e-06			0.0267188	0.00938432	0.0427431	0.000701953																	0.0465651	0.000253595
Ddi2															0.0435608	0.00196002			0.0403461	0.000389603
Ddit3					-0.173154	0.00995856									-0.0848004	4.69656e-07	-0.0728861	0.00157869
Ddit4	0.553884	4.81209e-29	0.527282	1.80901e-07	0.557042	6.20943e-21							0.547419	4.72244e-113	0.256191	1.06115e-61	0.256842	1.04527e-44	0.271389	1.92645e-99	0.333377	2.87926e-94	0.394562	1.27502e-10	0.260967	1.10115e-24	0.352461	6.0179e-10	0.414259	6.47327e-32									0.31946	2.40201e-81
Ddost													-0.189199	8.86991e-13
Ddt															-0.109638	5.71768e-08			-0.117589	3.3607e-15	-0.103743	2.29938e-07			-0.148418	0.00114917													-0.116858	7.63125e-10
Ddx1													-0.00155818	0.00947515	0.0617663	0.00405081													0.180559	0.00789287									0.0710411	0.00450674
Ddx11																					-0.0201803	0.00662792
Ddx17																			-0.0896415	5.72885e-07	-0.0991397	3.49355e-05							-0.189074	0.00376937									-0.0941195	7.90392e-05
Ddx18													-0.112386	0.000143771					-0.0997944	4.60325e-10
Ddx19b																			0.0258568	1.09602e-05	0.034365	0.000361424																	0.0278479	0.00339401
Ddx20																					-0.0508198	9.20592e-05																	-0.0356215	0.00259634
Ddx21															0.105105	6.67723e-07	0.13247	2.5266e-06							0.165808	0.000695528	0.23703	0.00181251											0.0905497	6.78844e-05
Ddx24																	0.0796971	0.0072464	0.0555692	0.004294	0.0926832	0.000181794																	0.0967242	5.2353e-05
Ddx27															0.0467315	0.00710561
Ddx31																			-0.0225499	0.00615343
Ddx39													-0.0270307	0.000584193	0.0844296	0.000590378
Ddx39b													-0.244418	1.13799e-12
Ddx3x													0.133328	0.000137424	0.0900091	0.000433579	0.15283	6.13376e-08	0.224038	1.68178e-36	0.190694	1.11157e-18			0.189106	8.3303e-05													0.166651	2.46598e-14
Ddx3y													0.240944	8.28697e-16					0.0810965	0.00116534	0.130538	4.21861e-06																	0.105169	0.000686921
Ddx4															-0.046914	0.00240509			0.0305237	0.000240432
Ddx46																	0.136113	5.75863e-06	0.0847164	4.13311e-06
Ddx5													0.0728266	0.00253226	-0.0574826	0.000212463			0.0443235	0.00264838	0.171416	2.60781e-27			0.108092	0.00520531			0.127184	0.00440148									0.0633588	0.000385359
Ddx50													0.189851	1.59057e-09	0.0866562	1.74003e-06	0.20286	6.81795e-14	0.0975418	1.6839e-09	0.126182	1.21291e-11			0.150732	0.00364439			0.177583	0.00329076									0.0957194	5.97459e-07
Ddx51																			-0.0285668	0.00191627
Ddx55																			-0.0431513	0.00252198																			-0.0407183	0.00185659
Ddx56													-0.0956817	6.80906e-09	-0.0629084	0.00140443			-0.0516091	0.00258139
Ddx58																					-0.0731897	0.000338351																	-0.0634214	0.00107355
Ddx6			0.44002	0.0044638	0.261723	6.37158e-05							0.270599	2.69367e-20	0.10285	2.30804e-05	0.170586	2.4122e-09	0.153695	4.29592e-19	0.141053	1.34318e-09																	0.132018	3.52405e-08
Deaf1																			-0.0345393	0.00233824
Decr1													-0.0384125	0.00472514
Dedd																			-0.025848	0.000821565
Dek													-0.0512541	0.000704736	0.127817	7.10622e-08	0.12255	4.44271e-07
Dennd1b													0.082179	0.00061105	0.0957358	2.4279e-10	0.0777947	0.00305908	0.0754315	4.62307e-08																			0.0526825	0.00738348
Dennd1c													0.147034	3.47537e-11
Dennd3	0.0975443	0.000181261											0.0757194	1.21365e-11	0.0328031	0.000102328	0.0408883	0.000110252	0.0189539	0.000356425	0.0275378	0.00058972																	0.028549	0.00229689
Dennd4a	0.918836	1.56307e-56	0.869683	5.71779e-13	0.851652	6.24731e-49							0.939189	2.09581e-206	0.513206	3.10875e-118	0.472642	7.78361e-65	0.362158	2.27109e-104	0.517019	1.49754e-140	0.431414	6.0217e-06	0.317963	3.31152e-20	0.621318	4.19396e-23	0.54896	2.15089e-27									0.47641	1.49942e-109
Dennd5a													0.0868014	0.000323236			0.0948189	4.62794e-05	0.0748138	2.00431e-07	0.124517	5.78315e-10			0.109248	0.00794223													0.11873	1.93837e-09
Dennd5b																			-0.0358974	0.000105219	-0.0168811	0.00322169
Denr													-0.116455	0.000412468
Depdc1a																			-0.0252305	0.00245853
Deptor					0.108343	0.00825955							0.0770501	1.30437e-05	0.0494952	1.8103e-07	0.100893	1.72385e-09			0.0305	0.00723866																	0.0440173	0.000120688
Derl1															-0.069348	0.00105257					-0.0816186	5.85725e-06																	-0.0654319	0.000193193
Derl2																	-0.0754506	0.000438009	-0.0706526	2.64237e-07	-0.0939069	6.30834e-08																	-0.0719121	6.0518e-05
Desi1																					0.0727674	3.13421e-07							0.116173	0.00146525									0.0387081	5.99902e-05
Det1																	-0.0568717	0.000525923
Dexi																					0.0522011	0.00370946																	0.0461633	0.00675786
Dffa													-0.0305226	0.00536945	-0.0281814	0.00383827
Dffb			0.0398958	0.00171935
Dgat1	0.150781	3.18738e-13											0.19472	7.00507e-43	0.139384	3.91954e-38	0.163145	4.08032e-29	0.200585	1.15726e-69	0.131337	2.28054e-27			0.101789	3.87132e-05	0.15395	0.000651194	0.10894	5.91859e-06									0.13567	2.91597e-28
Dgcr14													-0.038387	0.00122692	-0.0373436	0.00198547			-0.0264288	0.00402128																			-0.0449256	0.000782699
Dgcr6													-0.115245	2.40797e-06					-0.0625331	0.000168695
Dgkd	0.0638591	0.00726738													0.062919	4.92959e-07			0.0918651	1.66604e-15	0.103561	1.20073e-11			0.113946	6.65923e-05													0.0949465	9.55436e-11
Dgke															0.0424386	1.7892e-08	0.0464167	0.000204617	0.0551823	1.56323e-15	0.0623354	9.91062e-10			0.0633592	0.000418094													0.0512404	1.41801e-07
Dgkg															-0.0470151	0.00131328					-0.0465633	0.00091517																	-0.052976	0.000169494
Dgkh																	0.029309	0.00366401
Dguok													-0.198278	4.06521e-10	-0.213587	5.02089e-26	-0.181667	9.12188e-11	-0.176786	1.90281e-31	-0.164236	4.48921e-15			-0.21617	2.32002e-05			-0.178977	0.00370738									-0.191332	1.96157e-21
Dhcr7																			-0.0367485	0.00403412	-0.0298815	0.00420439
Dhfr	-0.106362	4.36191e-08											-0.0785491	9.94849e-19					-0.0822349	0.000174897
Dhrs11													0.107185	1.37495e-07	0.0858044	1.54267e-09	0.0883055	5.53798e-07	0.0631594	7.876e-10	0.0999232	2.47758e-15							0.0882488	0.000389517									0.0955113	1.12005e-13
Dhrs13													-0.0410592	7.46612e-06					-0.0465331	1.96631e-06
Dhrs3	0.120408	5.744e-05			0.156917	1.17971e-06							0.124188	1.38426e-21	0.19552	3.03252e-32	0.0962752	6.67872e-16	0.106374	3.61275e-16	0.158518	1.49659e-12							0.192785	0.00174297									0.175029	4.41835e-16
Dhrs4													-0.0960015	8.01077e-07					-0.0861124	5.66604e-07
Dhrs7													0.0669121	0.00041419					0.0401196	0.0040792
Dhrs7b													-0.0544411	0.000578305	-0.0654889	4.44166e-07			-0.0798671	1.16195e-12	-0.0566338	0.000122305																	-0.0673507	1.81506e-06
Dhx35															0.0213939	0.00651792
Dhx38																	0.0542317	0.00349193	0.0305214	0.00713169	0.0464228	0.00452255																	0.0468861	0.00121358
Dhx40					0.136851	4.36491e-05							0.0970799	3.05021e-16	0.076467	2.75059e-19	0.0616595	1.92246e-10	0.0997958	6.85849e-33	0.087914	3.03255e-20			0.0720863	2.17099e-06													0.0904224	8.02215e-21
Dhx8																					-0.0522007	0.0013688
Dhx9															0.0794443	0.00122164	0.157324	9.86793e-08	0.0928171	3.06065e-07	0.0835261	0.000804821																	0.0990129	6.70025e-05
Diablo													0.104914	0.000284582					-0.0509429	0.00456662
Diaph1													0.162628	2.31381e-10	0.0730046	0.00509416	0.14662	3.56522e-10									0.223259	0.00105372
Diaph2													0.05866	0.0002138					0.0285912	0.00364142
Diaph3													0.0697691	0.0010078	0.0925503	1.39115e-06	0.0989359	0.00056623	0.0727983	2.85556e-05																			0.0652911	0.0045575
Dicer1													0.0658497	0.00840832	0.0611764	0.00388419	0.0812566	0.000297071	0.0640868	1.87529e-05
Dido1																					-0.0794029	0.000867551
Diexf																			-0.0352323	0.000396499
Dip2b															0.0596169	1.70146e-05			0.0638759	2.25438e-10	0.108297	1.76976e-11							0.126076	0.00171732									0.0938007	1.58642e-09
Dis3l																			-0.0219462	0.00599328
Dis3l2															0.0316444	0.0058541					0.0496791	0.00208735			0.0784673	0.000967178
Dkc1													-0.230354	5.51146e-17					-0.0745173	4.44175e-06	-0.132866	1.40684e-08																	-0.0727764	0.0042705
Dld					0.305981	3.50683e-08							0.128823	9.99168e-07
Dleu7																			-0.0159982	0.00240823	-0.0257903	4.34694e-05																	-0.023635	0.00010324
Dlg1													0.0664192	0.0007174					0.0307492	0.000305353
Dlg4															-0.0489465	0.00540334			-0.032011	0.00176065	-0.070046	1.9769e-05																	-0.0480616	0.00562114
Dlgap5																			-0.0677805	3.49627e-06	-0.0631294	0.000479562							-0.284852	5.27952e-08									-0.0419925	6.99599e-05
Dlst															0.0677038	0.00237929			0.0542123	0.00392317	0.0642218	0.00854851																	0.0685489	0.00343148
Dmac1													-0.0837031	0.000779096	-0.0609908	0.00713833	-0.0843281	0.0046832	-0.103697	3.95889e-11																			-0.0609038	0.00904218
Dmwd													0.120588	6.49821e-11	0.105961	9.44771e-14	0.0688042	0.00214495	0.0734992	9.67032e-10																			0.0585512	0.000129514
Dna2													-0.0295828	0.00010517			0.000815309	0.00239819
Dnaaf3															-0.0266889	0.000773771	-0.0494677	3.53457e-05	-0.0220747	6.66694e-05
Dnah8																	0.0118816	0.00835579
Dnaja1															-0.0576152	0.00686831			-0.0900576	1.34186e-07	-0.137534	4.08998e-11																	-0.0952849	1.14369e-06
Dnaja3													-0.0539546	0.00350325	-0.0497352	0.00587953	-0.098227	8.78325e-06	-0.059799	5.62213e-06	-0.0759338	2.81659e-05																	-0.0647449	0.000246803
Dnajb1					-0.284291	0.00144972							-0.110876	0.000868143	-0.121741	2.95729e-16			-0.0889576	7.07669e-08	0.0804403	0.000245683
Dnajb11																			0.0427784	0.000301061
Dnajb14																			-0.0469626	0.000111019
Dnajb2															-0.0402392	0.00334411
Dnajb4															-0.0698319	1.23176e-05			-0.03495	0.00729511
Dnajb6	0.246612	1.0777e-05			0.128355	0.00220907							0.240394	3.03201e-21	0.10098	5.65685e-06	0.182149	1.16523e-11	0.159062	6.05752e-25	0.179831	6.24165e-19			0.170383	0.000373633			0.277328	2.07921e-05									0.15661	5.71461e-15
Dnajb9													-0.110276	0.000559316	-0.107952	4.88076e-11	-0.0877634	0.00167445
Dnajc1																			-0.0578297	0.000983799
Dnajc10									-1.19196	0.00470476
Dnajc11															0.0472437	0.00460763
Dnajc12					0.0510193	4.78676e-05
Dnajc13																			0.017987	0.00679634	-0.0240296	0.00566206
Dnajc15													-0.134195	7.20682e-10					-0.0673584	2.64857e-05
Dnajc17													-0.0210666	0.00926195
Dnajc19																			-0.0580018	0.00019382
Dnajc2																	0.128592	4.65977e-06
Dnajc21																	0.0899079	0.00173772
Dnajc24															-0.075814	1.29067e-06	-0.0532183	0.00151787	-0.0602854	8.88352e-07
Dnajc3																	0.0909786	0.00788663	0.05436	0.000209068
Dnajc30																					-0.0332323	0.00567995
Dnajc4															-0.0468716	0.000338197	-0.0475864	0.00433838
Dnajc5													0.0964548	1.10883e-05	0.0627903	0.00280978	0.0805101	0.00780886	0.0726406	1.21674e-05	0.0636476	0.00649446																	0.0776579	0.000504877
Dnajc6															0.0467187	8.80827e-07	0.0337352	0.00469492	0.0773193	2.00111e-18	0.0709135	1.38188e-08			0.071302	0.00286674			0.077575	0.00103786									0.0694269	1.14494e-09
Dnajc8															0.103956	2.15074e-06	0.103786	6.2829e-07
Dnajc9	-0.229633	6.70972e-06											-0.147293	2.09307e-21	0.0764918	0.00908114	0.0559396	0.0099355
Dnase1l1																					-0.0224155	0.00824306
Dnase2a																					-0.0670589	0.00136369																	-0.0760097	4.81986e-05
Dnlz																			-0.0558091	0.00010311	-0.0490739	0.00217449
Dnm1l																	0.0715249	0.00431876	0.0753193	4.23299e-08
Dnm2													0.0331855	0.00092462
Dnmt1	-0.227186	2.07728e-05											-0.176891	1.51602e-24	0.105886	4.73063e-07	0.136021	0.000211635
Dnmt3a																			-0.0520919	0.000336502	-0.0707261	0.000353909																	-0.0650119	0.00101672
Dnmt3b															-0.055962	0.00720731
Dnpep	-0.0588765	0.00946878
Dnph1													-0.135104	1.09082e-22					-0.0870196	5.47703e-07
Dntt																			0.169195	2.15601e-09
Dnttip2															0.0619515	0.000471017			0.0461505	0.00737278	0.0676899	0.00796025
Dock10																	0.0704093	0.00176108	0.132805	7.98165e-15
Dock2													0.100569	0.00866581					0.0601008	0.00173363
Dock9																			0.0201855	0.000348034
Dohh															-0.0949343	9.72467e-09	-0.0880407	0.000570229	-0.0673796	9.91373e-06	-0.0950664	9.61688e-07			-0.121232	0.00681139													-0.108387	7.78796e-09
Dok1													0.216683	1.25426e-20					-0.0225888	0.00285632
Dok2																	0.0840808	0.00123227
Dok3																			0.0279111	5.75133e-06
Dolk																			-0.0252551	0.000264163
Dopey2													0.0441997	0.000234177	0.0362347	0.000182319	0.0354476	0.00198515	0.0235248	4.04588e-06	0.0391543	2.7936e-05																	0.0379021	5.02717e-05
Dot1l													-0.035268	0.00209799	-0.0474525	0.000782626
Dpagt1																					-0.0418506	0.00267815
Dpf2													-0.084872	0.00259809					-0.05617	0.00288284
Dph2													-0.0345767	4.85391e-05	-0.0453921	9.07503e-10	-0.0404142	0.000198061	-0.0587868	5.52411e-19	-0.0530722	2.73631e-08							-0.078602	0.000128383									-0.0521421	8.05646e-10
Dph3													0.100394	0.000103083
Dph5																					-0.0739351	0.00082856
Dpm1													0.124576	3.12255e-05
Dpm2																			-0.0845145	4.44592e-08
Dpm3															0.0850377	0.00012501	0.0879629	6.61991e-06	0.071001	1.47677e-05	0.0593496	0.00748687
Dpp3													-0.0663433	0.00141834
Dpp4																			0.0440431	0.00050182
Dpp8													0.0936874	2.37968e-05	0.0571385	0.00293865			0.0578204	0.000224891
Dpp9															0.0473354	0.000455269	0.0575949	0.00457286
Dpy30													-0.173948	1.09287e-12					-0.0691587	9.6735e-05
Drap1																			-0.070874	8.38476e-06	-0.0769379	0.000236249
Drg1													-0.138854	3.33559e-09					-0.0976615	2.80575e-09	-0.0730091	0.003251																	-0.0809696	0.000209634
Drg2																					0.0206972	0.0020557
Drosha																			0.0287915	0.00524804
Dscc1																			-0.0539929	0.000181796
Dscr3																			-0.0242435	0.00340495
Dsn1		0.00599854											-0.0202822	0.00683786
Dtd1																			-0.0542472	0.00274414
Dtl					-0.126081	0.00214761							-0.150414	1.83194e-18	0.0641259	0.00440666	0.186254	3.30804e-10	0.0600108	0.0031348					0.190822	0.0032999			0.389859	2.54989e-11									0.0891207	0.00303679
Dtnb															0.0629629	8.74264e-06			0.0338392	0.00435897																			0.0475855	0.00307936
Dtnbp1													-0.104622	0.00280627			0.0893242	0.000862096
Dtwd1																					-0.0437459	0.00326478
Dtx3													0.11605	2.19064e-05			0.0913106	0.000673285	0.0478103	0.000639964	0.0674972	0.000977366																	0.0775773	0.000176126
Dtx3l													-0.0553397	0.00884648
Dtymk	-0.26949	0.00929916											-0.122754	8.16054e-09	0.153969	1.1858e-12	0.122887	7.15941e-05			0.0680692	0.000448433																	0.115315	4.43009e-07
Dus2													-0.0565417	0.000479652			-0.0500751	2.53895e-05	-0.0175851	0.00597263
Dus3l			0.0188547	0.00374223
Dusp1															-0.0382003	0.00279968					0.544297	1.60008e-100	0.473547	0.00866074	0.395073	6.73353e-09			0.370227	2.23536e-05									0.292069	7.3131e-20
Dusp12																					-0.0592856	0.000320503																	-0.0463149	0.00828985
Dusp16													0.0431665	0.000438983
Dusp19																	-0.0446865	0.00296562	-0.0305612	0.000674206
Dusp2	0.839468	2.4112e-16	0.94554	2.51067e-05	0.616606	2.31779e-10							0.97659	1.55662e-110			0.377275	4.73451e-19	0.0806483	0.00130118	0.242614	4.3296e-21					0.326387	0.0058625	0.272989	0.000844043									0.182238	2.59251e-08
Dusp23													-0.052515	0.00464269					-0.0298111	0.00113679																			-0.0412694	0.00794711
Dusp3													0.061063	5.84691e-05
Dusp4													-0.033508	0.00817641
Dusp5													0.160551	7.27487e-14	0.00911499	5.00831e-06			0.11455	1.07105e-12	0.343361	1.99585e-75	0.306098	0.000763552	0.195773	1.28593e-08			0.335265	1.6172e-14									0.193246	7.22183e-23
Dusp7																					-0.0503482	1.11143e-06																	-0.0394055	3.56783e-05
Dut	-0.428148	1.75351e-13											-0.347472	3.87591e-55	0.0529538	0.00745751	0.0951592	0.00832265	-0.114341	3.33698e-07
Dvl2													-0.0531069	8.39083e-05	-0.0418091	0.00306089			-0.0338949	0.00266213
Dym															0.0602261	0.000474052	0.072569	0.00202115			0.0915988	8.36031e-08																	0.0645291	0.000437554
Dync1h1													0.122725	6.24097e-06	0.0944006	1.2737e-06	0.0752267	0.00170231			0.0462702	0.00360451																	0.0572724	0.00945532
Dync1li1													0.0850847	2.31966e-06			0.0673273	0.000240364	0.063847	1.36151e-06
Dync1li2															-0.04334	0.00897109			-0.0328724	0.00534848	-0.0375247	0.00494246
Dync2h1															0.0490495	2.98541e-07			0.0255129	0.00758796	0.0384999	0.000164054			0.0554754	0.00883728													0.0395032	6.49912e-05
Dynll1	-0.365851	6.13547e-06											-0.420634	4.13575e-46	-0.326053	2.29301e-45	-0.234869	1.702e-13	-0.275402	1.8899e-61	-0.227428	9.72614e-25			-0.174076	0.0042394	-0.335055	2.00845e-06	-0.319648	6.8607e-10									-0.221935	1.01756e-23
Dynll2																	0.0962277	0.00354289			0.0759522	0.00266961																	0.0729447	0.00346329
Dynlrb1																			-0.102431	9.82359e-12
Dynlt1a																			0.0442854	9.76153e-09	0.0328273	0.00161572																	0.029998	0.00196242
Dynlt1f															0.136929	5.69228e-14	0.121816	3.21709e-08	0.167016	2.46898e-27	0.165964	5.10885e-18			0.148195	0.000734962			0.235491	6.96369e-07									0.141931	3.41106e-13
Dynlt3	0.226839	0.00369108			0.228571	0.0014372							0.226056	1.85888e-15					0.0496665	0.00695331
Dyrk1b															-0.0238112	0.00133005	-0.0277755	0.00906942
Dyrk2																			0.0539733	1.04527e-07
Dyrk3	0.579742	2.0677e-29	0.465689	3.33611e-11	0.528871	1.28787e-18							0.51809	1.36176e-105	0.0969488	1.78169e-09	0.219541	1.73251e-23									0.321616	1.06007e-06											0.06212	0.000256319
E030030I06Rik															-0.0330347	0.000202339	-0.0245999	0.00341723			-0.0335803	1.5131e-05																	-0.0284999	0.00025714
E130307A14Rik																			0.044135	3.68557e-06
E130308A19Rik																	0.0548281	0.00122607	0.0447811	2.66819e-05	0.0399008	0.00139605																	0.0364401	0.00857963
E130309D02Rik																																	-0.372546	0.00602972
E130311K13Rik																	-0.0537943	0.000630058	-0.0287469	1.88387e-05
E230032D23Rik																					-0.0800127	1.02817e-09			-0.0656645	0.00576595													-0.0558031	1.44457e-05
E2f1	-0.0750161	0.000414358											-0.0505858	9.00626e-13					-0.0539258	0.00011147
E2f3													-0.0519757	8.52114e-06
E2f5																					-0.0198163	0.00192072																	-0.0195404	0.00480592
E2f6													-0.0742424	2.67927e-06	-0.0509209	0.000305695			-0.0630205	5.7688e-07	-0.0672596	1.70589e-05																	-0.0620696	0.000123325
E2f7																	0.0749228	1.31746e-07
E2f8																					-0.0604289	6.75764e-05																	-0.0257029	0.00982351
Eaf1															0.0221864	0.0011885
Ebag9															0.0602743	0.000600832
Ebi3													0.0938254	0.00172927					-0.0374194	0.00115585
Ebna1bp2													-0.224023	4.14365e-16	-0.0780817	0.000953519	-0.119184	0.000135279	-0.160348	2.28314e-21	-0.0725811	0.00272115																	-0.0739121	0.00268256
Ebp													-0.105214	9.19146e-09	-0.0913066	1.99704e-07	-0.116394	2.15607e-05	-0.0930204	3.56299e-10	-0.120908	8.05854e-09			-0.164692	0.00243149													-0.105914	5.41149e-07
Ebpl													-0.104666	0.000117379	-0.0742358	0.000345885	-0.0783928	0.00951898	-0.0518831	0.0017303	-0.0863182	3.03613e-05																	-0.0881237	2.68188e-05
Ecd															0.0568334	0.00237929
Ece1																			0.0167884	0.00083011
Ech1													-0.10272	0.000629845	-0.104784	2.39981e-06	-0.107501	0.000168268	-0.101649	1.5947e-10	-0.0761022	0.000175746																	-0.07949	0.000504877
Echdc1																	-0.051205	0.00240276	-0.0471385	5.14399e-05
Echs1															0.0397404	0.00599731			0.0615189	0.00022389
Eci1													-0.175425	1.17989e-12			-0.137408	1.59101e-06	-0.0837271	2.74936e-08	-0.0934006	5.85134e-06																	-0.11003	1.92294e-08
Ecm1													-0.0227523	0.00675255
Ecscr																																							-0.0371318	0.0014585
Ecsit																																	-0.473685	0.0065845
Ect2															0.0276502	0.00571645			0.0164531	0.00398973									-0.190438	0.00122361
Edc3																			-0.0430015	0.000191483
Edc4																					-0.052286	7.56193e-06																	-0.0322916	0.00351113
Edem1																			0.0413462	4.77624e-05
Edem2													-0.0609331	0.0016367					0.027147	0.00730189
Edf1					-0.216543	0.00932091							-0.172452	8.1932e-10			-0.0872896	0.00188337	-0.14588	4.89444e-23	-0.0915138	1.03809e-06																	-0.0832614	3.20233e-05
Eed													-0.0899956	7.76083e-07					-0.0812335	1.12714e-08	-0.0674596	0.00864761
Eef1a1													0.0538441	6.419e-08	0.0259543	0.00457751			0.0344639	2.16855e-05													-1.40857	1.62755e-05
Eef1akmt1													-0.0915828	1.00684e-06	-0.0695671	9.01669e-05	-0.0808927	0.00093866	-0.082066	2.35862e-09	-0.0489299	0.00576266																	-0.0592223	0.0016705
Eef1akmt2																					-0.0579434	0.00547918
Eef1akmt4													-0.043146	0.000167899	-0.0501344	6.01571e-05	-0.0703152	1.10974e-05	-0.0536238	3.64188e-07	-0.0487123	0.000794913																	-0.0576338	1.50667e-05
Eef1b2	-0.243554	1.4432e-13			-0.271989	1.80812e-15							-0.223163	1.43815e-52	-0.0823146	3.56947e-15	-0.11394	1.76185e-17	-0.0723698	4.9715e-16	-0.100407	1.9824e-22			-0.0967653	6.66397e-06	-0.142454	0.000575092					-1.91084	3.60068e-06					-0.086848	7.86598e-16
Eef1d	-0.175371	0.00304357											-0.117594	1.94637e-05	-0.131512	1.3796e-16	-0.113127	5.72316e-07	-0.101866	7.04256e-14	-0.160771	6.95096e-23			-0.134744	0.000128103			-0.141392	0.000142545									-0.154358	1.30127e-21
Eef1g	-0.32857	7.15791e-11	-0.513934	3.29044e-06	-0.266857	6.72184e-07							-0.334392	2.9475e-55	-0.120757	2.00493e-14	-0.129717	1.26964e-09	-0.128019	3.65181e-24	-0.133149	4.97539e-17											-1.97635	0.00558666					-0.108642	3.8226e-11
Eef2													0.200068	1.08432e-31	0.0938528	1.54044e-13	0.0762463	5.81939e-05	0.129656	2.06413e-32	0.122266	3.48469e-19			0.118721	8.19985e-05			0.116498	3.92804e-05									0.106792	1.36686e-15
Eef2k													-0.160776	2.6333e-09	-0.112024	6.01122e-07	-0.135934	2.99142e-06			-0.139455	3.59823e-10																	-0.120482	9.86685e-08
Eef2kmt													-0.0975141	8.27226e-08	-0.0905947	4.52295e-07	-0.096893	0.00036963	-0.06339	6.4419e-06	-0.0770629	3.78595e-05																	-0.0694625	0.000298856
Eepd1																			-0.0221228	0.000704915
Efhd2					0.159896	0.00839519							0.159316	3.36971e-12	0.0937887	2.43481e-08	0.163364	4.09495e-10	0.0703083	3.40039e-05	0.162542	6.06591e-16							0.209417	3.38857e-06									0.160047	3.04162e-16
Efl1															0.0181711	0.00666791					0.0438176	0.00268818
Efna1													-0.0670854	1.50717e-10
Efnb1															-0.0260905	0.00348943
Eftud2															0.0801079	5.46348e-05	0.0773492	0.00501875	0.0401848	0.00640625	0.10407	4.44434e-06			0.133282	0.00874595													0.0992939	1.17002e-05
Egfl7			0.518262	0.00033218	0.202113	0.00029968							0.289141	3.35184e-37	0.149896	9.99802e-11	0.136012	8.91192e-06	0.163877	4.55131e-17	0.103541	3.55053e-05																	0.137484	1.67517e-08
Egln1															0.0880051	1.37448e-07			0.0691331	7.98724e-08	0.0803891	0.000208946																	0.0817852	3.5181e-05
Egln3	0.209071	2.56005e-14			0.321997	2.86061e-15							0.241599	9.00519e-56	0.125854	1.97563e-21	0.167986	1.6612e-32	0.110631	2.0226e-30	0.11479	6.81533e-15			0.0919951	0.00082277	0.165287	1.01042e-05											0.139656	1.44889e-22
Egr1													-0.188397	5.69164e-05	-0.176375	7.28269e-08	-0.1302	0.00279457			0.121147	2.2264e-05
Ehbp1l1																			-0.02776	0.00576119
Eid1																			-0.0584928	0.00249986
Eid3																			0.0173332	0.00848912
Eif1	0.284958	1.51705e-11	0.435324	1.88526e-05	0.202228	3.72242e-07							0.334253	3.00325e-80	0.138868	4.21022e-29	0.216019	1.51219e-37	0.140918	5.47005e-41	0.283368	3.08584e-99	0.29696	0.0015064	0.191134	1.29648e-14	0.201508	1.58518e-05	0.244923	2.6161e-20									0.21806	1.83458e-60
Eif1a													0.124511	6.72197e-05			0.127579	2.16613e-05
Eif1ad																			-0.0484444	0.00900095
Eif2ak2															-0.0722256	0.000902234	-0.0876957	0.00513952			-0.0655631	0.00177392																	-0.0729996	0.0014028
Eif2ak3																					0.022479	0.00266295
Eif2ak4													0.0171743	0.00946911					0.0260782	0.00518515	0.037246	0.00471286																	0.0355676	0.00770553
Eif2b1													-0.0464343	0.00411884
Eif2b2													-0.0548659	0.00472903
Eif2b3													-0.0580012	0.000688381	-0.0520388	0.000239333																							-0.0412032	0.00310125
Eif2b4													-0.0555752	4.59748e-05	-0.0398592	0.00277096			-0.055591	7.24422e-07
Eif2b5																																	-0.678756	0.00415321
Eif2d													0.0562084	0.00159564					-0.0647784	8.79642e-07
Eif2s1													-0.136153	1.3261e-07					-0.100493	1.41274e-10	-0.121032	1.89688e-08																	-0.0848218	0.000172031
Eif2s2																			0.0510458	0.00938421
Eif2s3x															0.0557742	0.00804213
Eif2s3y													0.115589	0.00159132
Eif3a																	0.0850153	0.00131442			-0.0745666	0.00128438
Eif3b															0.0868873	0.000158631	0.105228	0.000117415
Eif3c															0.0698887	0.00251427	0.101701	0.000195022			0.0784533	0.000186791			0.193724	0.000264168													0.0895843	1.55833e-05
Eif3d													-0.118636	1.60727e-05					-0.0917142	1.46207e-08
Eif3e															-0.0939102	8.60741e-08
Eif3f															-0.0910403	1.52672e-09	-0.0540176	0.00491539																					-0.0572978	0.00116772
Eif3g													-0.130379	6.43605e-06					-0.0470765	0.0021414
Eif3h															-0.0847767	4.13368e-07	-0.104891	3.17224e-06	-0.0642775	3.57019e-06	-0.0602494	0.0015675																	-0.0708567	7.95536e-05
Eif3i					-0.276849	0.000305658							-0.159662	1.56883e-08	-0.0850918	2.53583e-06			-0.100691	9.7682e-13	-0.0718544	1.22386e-06			-0.0804871	0.00691389													-0.071076	3.80202e-05
Eif3j1	0.239958	0.00340339
Eif3k																			-0.0674683	1.32271e-07	-0.0666039	0.000189001																	-0.0605187	0.000194522
Eif3l													-0.0911825	0.0081211
Eif4a1													-0.126815	4.9502e-06					-0.0803583	8.08029e-09	-0.0578261	0.00822114
Eif4a2															-0.200729	7.95136e-23	-0.175635	2.69128e-10	-0.0847065	3.12266e-06	-0.0960494	1.42943e-05																	-0.129214	1.97168e-08
Eif4a3																	0.0736708	5.29866e-05	-0.0523564	0.000766281
Eif4b													0.0749811	0.000800167					0.0823751	7.80534e-08
Eif4e																			-0.0964318	2.12003e-08
Eif4ebp2													0.102847	0.000157786	0.0797318	0.000120433	0.0932704	0.000529401	0.088695	2.06186e-07	0.0828568	0.000195125							0.170371	0.00357458									0.0896648	5.2022e-05
Eif4enif1																			0.0604267	7.40387e-05
Eif4g1															0.0716945	0.00413207	0.115135	0.000329859
Eif4g2	0.310755	8.31599e-07			0.275886	0.000600531							0.183196	1.02997e-10	0.10498	3.95969e-08	0.187227	1.80084e-12	0.0915747	3.02783e-08							0.210877	0.0027565
Eif4h													0.111077	0.00406007	0.101847	9.90053e-07					0.0808022	0.000107538			0.126493	0.00352364													0.0688031	0.000927788
Eif5					-0.354436	4.86596e-05							-0.168414	9.30717e-06	-0.170986	2.64861e-14			-0.0575796	1.28579e-05	-0.169759	1.01595e-13																	-0.162359	5.61788e-13
Eif5a													-0.108088	0.00016216					-0.0885429	1.30161e-09
Eif5b																			-0.0569875	0.00599243
Eif6													-0.142013	4.19789e-08
Eipr1																			-0.0304279	0.000995274
Elavl1					0.184967	0.00995856													-0.0670557	4.13109e-05
Elf1													0.188183	5.59294e-07	0.0840928	8.58759e-06	0.172527	1.80931e-09
Elk4													0.0936873	0.000637266
Ell2	0.184343	1.20228e-09			0.104388	0.00512964							0.158253	8.24303e-26	0.0954573	1.81437e-18	0.110008	1.73793e-13	0.0968498	1.83715e-30	0.0956163	1.61826e-26			0.0624	2.62719e-07	0.17292	0.0058625	0.144282	1.12931e-08									0.0963134	1.98965e-21
Elmo1																			0.0594929	0.00226078
Elmod2																			-0.0137155	0.00659441	-0.0261207	0.00240018
Elmsan1	0.158383	1.5021e-11			0.241174	4.19011e-11							0.257022	2.30395e-58	0.122702	8.52554e-26	0.107563	1.87252e-10	0.0494808	1.50572e-07	0.124272	1.11137e-19			0.0787792	0.000867586	0.155277	0.000291126											0.118738	8.56724e-19
Eloa															-0.0609306	2.83244e-05			-0.0595014	2.07185e-07	-0.0691179	3.35089e-05																	-0.068385	2.26771e-05
Elob																					-0.0743269	0.000291677
Eloc																					-0.0126855	0.000383038
Elof1	-0.23519	0.000505919			-0.234625	9.41811e-06							-0.245776	3.27201e-29	-0.142889	9.15374e-12	-0.108096	0.00080607	-0.183743	1.57377e-29	-0.165531	4.08005e-17			-0.168501	8.08007e-05	-0.205669	0.00724037	-0.233239	3.43471e-05									-0.162605	1.52913e-16
Elovl1													-0.10457	1.32583e-06	-0.0803161	8.86426e-07	-0.116029	2.78201e-05	-0.111695	2.71725e-12	-0.0443202	0.00649918																	-0.0514538	0.00545493
Elovl5					0.16343	4.29651e-07							0.137554	2.5115e-22	0.204821	2.72489e-42	0.157771	8.72945e-21	0.21152	3.68025e-68	0.190788	5.92491e-31			0.171152	1.29178e-07	0.192496	0.000224135	0.197784	6.54334e-09									0.21809	1.30315e-40
Elovl7															-0.020387	0.00726944			-0.0214446	0.00014486
Elp3													-0.0258586	0.000847206
Elp4																			-0.0367717	0.00469797
Elp6													-0.0104958	0.00700312					-0.0350894	3.94753e-05	-0.0394998	0.000320726																	-0.0297629	0.00369811
Emb	0.382714	6.87027e-10	0.383072	0.00787602	0.240813	1.08066e-05							0.324124	3.75737e-42	0.406094	2.15984e-72	0.261742	1.68296e-25	0.51091	1.30968e-110	0.301247	1.89961e-31					0.257279	0.00268744	0.426584	1.02571e-07									0.361692	6.86273e-40
Emc10													-0.0801909	0.00960076
Emc6															0.0433911	0.000953202
Emc7															0.0727931	0.000283865	0.112067	6.76198e-05	0.0827215	4.61766e-07	0.115131	3.5168e-08							0.193622	0.00524546									0.123332	4.52523e-09
Emc8													-0.0786883	0.000635508					-0.0897976	7.70914e-11	-0.145208	9.9137e-12																	-0.0857268	9.24031e-05
Emc9													-0.0356869	0.0014961	-0.0290861	0.00232538																							-0.0264492	0.00970817
Emd	0.148194	0.00589624											0.193308	7.8499e-11	0.1437	1.94289e-13	0.158896	4.51555e-10	0.114241	3.04931e-12	0.157107	4.08576e-14			0.167609	0.00739066			0.246127	2.89926e-05									0.133524	2.77367e-11
Eme1																			-0.0320486	0.000296301
Emg1													-0.158904	2.97518e-08	-0.115022	1.72436e-08	-0.0884145	0.00298876	-0.104491	2.75664e-11	-0.0996995	1.06516e-06																	-0.0995511	1.39101e-06
Emid1															0.0384799	0.0037585
Emilin1													-0.0705381	0.000714239					-0.0491224	0.000612893
Emilin2																			0.0912099	9.61453e-18																			0.0228291	0.00566043
Eml3															0.0264889	0.00813852			0.0228022	0.00207944
Eml5													0.0615957	7.14269e-07	0.0404271	2.36416e-05	0.056631	2.05588e-07	0.0356431	2.96037e-07	0.0387218	3.50755e-05																	0.0383412	1.46977e-05
Emp3	-0.427872	9.24738e-06											-0.330803	1.10379e-25	-0.142263	1.03295e-15	-0.102784	8.44861e-05	-0.146585	7.24281e-24	-0.116657	4.62775e-09							-0.114145	0.00338347									-0.114137	2.57949e-09
Emsy																			-0.0328251	0.00341458
Enah													0.0309229	0.0064224
Endov																			-0.0263782	0.00409854	-0.0256018	0.00252323
Engase																			-0.0143546	0.00637901
Eno1															0.144729	2.73425e-13	0.18451	4.96557e-12	0.216008	1.47696e-40	0.179173	1.13947e-20			0.178162	4.76635e-07			0.249409	1.80022e-07									0.175528	1.72023e-20
Enoph1															0.0403959	0.00688633					0.0509603	0.00350658
Enpp4													0.0812373	4.07884e-05
Ensa	0.271787	0.00232913											0.150309	6.0887e-07							0.0846074	7.856e-05																	0.0657563	0.00060923
Entpd1					0.0307626	1.81993e-05
Ep400															0.0566706	0.00752324																							0.0673306	0.00873203
Epb41					0.391468	5.72966e-12							0.310318	7.06143e-38	0.0940336	1.51249e-07	0.111147	1.0266e-05	0.101735	2.53011e-13	0.0850153	2.56085e-07					0.236537	0.000730273											0.0780654	1.72699e-05
Epb41l2																			0.0578982	1.05259e-06
Epb41l3															0.0305746	0.00997111			0.0404135	1.26361e-05																			0.0477872	0.00288918
Epb41l4aos													0.164418	1.50408e-07	-0.0762145	0.000191561
Epc2																			0.051511	0.000341338	0.0577854	0.00531676
Epg5																					0.013217	0.00358469
Epop													0.0313304	0.000922711	0.0426037	0.00039655	0.0492711	0.00129977	0.0337581	0.00165576
Epor																			-0.0248125	8.55681e-06
Eprs																					0.0963331	3.62069e-05
Eps15l1																					0.058874	0.00217338																	0.0537226	0.00715802
Eps8															-0.0381369	0.00238258
Epsti1																					-0.0814152	0.00179984
Eral1																							0.0670317	0.00329755
Erap1															0.0561984	0.00804691
Erbin													0.0918697	0.00116853			0.0905963	6.6469e-05
Ercc5					0.100819	0.00828364							0.120486	1.13032e-14	0.0710374	3.98215e-09	0.0847111	3.50894e-10	0.0711295	2.58991e-17	0.0993336	6.81694e-18			0.0578563	0.00325244			0.11627	5.52548e-05									0.0855864	5.05419e-14
Ercc6l																			-0.040633	8.97582e-09
Ercc8																					-0.040376	1.23955e-05																	-0.0235183	0.0070885
Erf																			0.0434577	1.16925e-05
Erg													-0.0798859	0.000334805					-0.0374527	0.000927012
Erg28													-0.162168	4.13756e-10	-0.122195	1.84009e-08	-0.0981803	0.000309966	-0.144378	2.28676e-19	-0.10572	2.13282e-06																	-0.102004	6.98312e-06
Ergic1															0.0510763	0.00300229			0.0571433	7.37983e-05	0.0598979	0.000430431																	0.0519092	0.00387246
Ergic2															-0.0542352	0.00899949			-0.044069	0.00168564
Erh															0.401864	6.88236e-93	0.487708	5.93943e-98	0.388415	1.63704e-139	0.413272	5.89214e-96	0.333008	0.00563941	0.605346	6.93854e-48			0.51093	4.56524e-25									0.419144	5.3714e-98
Eri1													-0.1071	6.91953e-10					-0.104859	5.87656e-10	-0.0677795	0.00844787
Eri2																			-0.0256585	0.00133356	-0.0405171	0.000295238							-0.108111	3.24861e-05									-0.0335951	0.000764613
Eri3													-0.0414581	0.00114813
Erlec1																					-0.0181319	0.000372371																	-0.0266789	0.00909397
Ern1	0.0978017	0.00404315											0.0795625	6.23478e-09
Ero1l																			0.068258	1.28687e-09	0.0454825	0.00209404																	0.0424597	0.00676016
Erp29													-0.115747	1.7893e-05	-0.0721092	0.00313151
Erp44																					-0.0525933	0.00334287
Esam													-0.203147	2.13623e-12	-0.105623	8.56275e-09	-0.23396	4.36473e-18	-0.124874	1.72215e-21																			-0.0751125	1.52224e-06
Esco1															-0.0613498	0.000269971					-0.0548841	2.39861e-05
Esco2															0.0140467	4.97897e-05			-0.0954372	1.10497e-09	-0.0865565	1.73706e-10			-0.0222373	0.00980273			-0.319808	1.0071e-11									-0.0592297	5.58919e-11
Esd																	-0.0861319	0.00237425	-0.0695027	4.8574e-06
Esf1																			-0.0702136	7.73367e-05
Espl1																	0.0278224	0.000880696
Esr1																			0.0221422	0.00570984
Esrra																			-0.0298258	0.000564452
Esyt1			0.204667	0.0015366
Esyt2																							0.0807292	0.00859431
Etaa1																			-0.0393853	0.00334643
Etf1													0.125964	5.4807e-07	0.0666817	0.000397607	0.108015	6.95965e-06	0.0736568	4.3639e-05																			0.0591223	0.00575098
Etfa													-0.127512	6.28453e-09
Etfb	-0.317661	0.000480445			-0.308807	2.49844e-05							-0.301491	2.28615e-27	-0.185886	4.22701e-20	-0.22552	3.61925e-18	-0.350304	2.22857e-121	-0.258168	2.89601e-43			-0.34789	6.48978e-18	-0.285458	8.62779e-06	-0.356514	9.00888e-15									-0.248991	2.24013e-41
Etfbkmt													-0.0821144	2.53637e-07	-0.073626	2.07822e-09	-0.0856458	4.06287e-09			-0.0483165	0.000314089																	-0.0551445	2.33578e-06
Etfrf1																			-0.0347533	0.00145128
Etnk1																			-0.0365652	0.00586935
Ets1															-0.0271524	0.00480116			0.0697601	1.54139e-10
Ets2					0.0978175	0.00873747							0.0827739	1.167e-08
Etv3																					0.104175	5.48787e-12																	0.0524979	0.000962017
Etv5															0.0219663	0.00606028			-0.00517981	0.00623967
Etv6															0.0500752	0.00139218
Eva1b													0.162844	1.55498e-11			0.0568937	0.000212573
Evi2															-0.0402614	0.00114558	-0.0399399	0.00585817	-0.0236688	0.00520649	-0.0455454	1.35344e-05							-0.084929	0.00114931									-0.0483351	6.07447e-07
Evi2a																			0.0273517	0.000439118
Evi5																					-0.0495953	0.000499144																	-0.0558642	5.04709e-05
Ewsr1																	0.0940644	0.000768879			0.0687748	0.00323929
Exo1																			-0.0486618	0.000835175
Exo5													-0.0537677	1.32808e-07	-0.0401432	1.65004e-05	-0.0394883	0.000906445	-0.0183556	0.0044988	-0.04402	1.4159e-05																	-0.0422125	7.26434e-06
Exoc2																			0.0292115	0.00125064
Exoc3																					-0.0700696	0.00162736			-0.12807	0.0032999													-0.0652781	0.00307351
Exoc5	0.147039	0.00603938											0.0628772	0.000509719	0.0612355	3.37482e-06
Exoc6															-0.0624714	4.79885e-05
Exoc6b					0.0603799	0.00260127							0.0617813	0.00308793
Exoc8																					-0.0221969	0.00956257																	-0.0299	0.000126476
Exog																			-0.0361818	2.07027e-10	-0.0354546	5.37483e-05																	-0.0299443	0.000279719
Exosc1													-0.0691073	0.000728392					-0.0964892	9.2582e-09	-0.0706702	0.000171697																	-0.0431571	0.00660865
Exosc10															0.0516614	0.00997376			0.0444143	0.00946639	0.0648836	0.00197018																	0.0636368	0.00223684
Exosc2			0.0317944	0.00233175															-0.0736065	7.09596e-07
Exosc3																			-0.0728073	8.29114e-08
Exosc4													-0.0272039	0.000592157							-0.0648044	0.00703937
Exosc5													-0.289107	9.60979e-29					-0.0936381	1.06388e-10
Exosc7													-0.14731	6.82436e-09					-0.0930519	7.92763e-09	-0.091192	8.23999e-07																	-0.0686822	0.00034401
Exosc8													-0.125611	3.19172e-11					-0.0662499	9.59531e-05
Extl3																					0.0371648	0.00401129
Eya1																			0.0527946	0.000145688	0.0695394	0.000294984
Eya2													0.0998679	0.000110585
Ezh2													-0.140657	1.49509e-21					-0.0824351	3.37763e-05
Ezr															0.0693082	0.000102328			0.104387	4.15194e-10	0.101308	5.48478e-05																	0.104481	7.48312e-06
F11r					0.112254	0.000380921							0.100624	0.000338146
F2r															-0.0449304	0.00214258			-0.0775113	2.03438e-08
F2rl3															-0.050038	1.02252e-05			-0.0791737	4.72434e-13	-0.0782299	1.35768e-09							-0.0760622	0.00730762									-0.0676843	3.49798e-07
F630028O10Rik																					-0.0833862	3.98209e-10																	-0.0558782	4.07395e-06
F830016B08Rik															-0.0335598	0.000106773			-0.0133878	0.000807914
F8a																					0.035188	0.00764045
Faap100																			-0.030617	0.00238965
Faap20					-0.211171	0.000507872							-0.156305	1.286e-10	-0.156359	5.15575e-17	-0.137789	9.08825e-08	-0.129348	1.21155e-18	-0.0751899	0.000279628																	-0.0983797	3.21413e-08
Faap24																			-0.0638174	1.01656e-12	-0.0568271	2.61454e-06			-0.062589	0.00945282			-0.101727	5.34958e-05									-0.0503048	6.93077e-06
Fabp5			0.239635	7.00024e-06	0.102974	0.00584613							0.0278302	2.39331e-10	0.16978	3.94654e-16	0.254463	1.52294e-15							0.185133	0.00356016													0.103374	0.000361017
Fadd													-0.0464623	0.000862144	-0.0457511	5.45853e-05	-0.0586796	0.00170394	-0.0677745	5.13309e-11	-0.0535623	0.000116684			-0.0792048	0.00277276													-0.0654526	7.1539e-07
Fads1															0.0577306	1.85005e-05	0.0771115	0.000113541	0.0461957	0.000304374	0.0620877	5.82841e-06																	0.0533856	0.000442744
Fahd1	-0.115913	0.00804229											-0.0959808	4.91866e-12	-0.0828833	1.02816e-09	-0.0606924	0.0033859	-0.0791506	2.98396e-14	-0.108812	1.73209e-16			-0.111893	0.000327801													-0.104214	2.47008e-16
Fam102a	0.0891232	0.00181315											0.0586729	2.31966e-06	0.0802936	7.67259e-12	0.0519619	0.000202186	0.0735214	1.01776e-22	0.135962	1.13515e-25			0.0772761	0.000623185													0.105803	2.49492e-16
Fam102b	0.106921	0.00477621			0.159363	7.70827e-05							0.146338	4.70374e-21	0.0969998	1.87344e-15	0.107383	4.08712e-11	0.0681328	6.47492e-16	0.0844762	3.95278e-10							0.115192	0.000707963									0.0933789	1.32939e-12
Fam103a1													0.0853298	0.00884648
Fam104a																			-0.0594528	0.000490201
Fam105a															-0.0510278	0.000170684
Fam107b	0.310806	1.40125e-05			0.426345	2.53167e-12							0.320202	1.08265e-31	0.199463	2.78176e-24	0.181349	1.28797e-10	0.254275	3.99722e-55	0.214417	7.77231e-23			0.28906	1.41385e-08			0.347004	6.73118e-09									0.201704	2.45255e-21
Fam109b																			-0.0373518	5.34536e-05
Fam110a															-0.0191255	0.00863511					0.147608	2.77036e-17
Fam111a	-0.121724	0.00753591											-0.112857	1.62178e-15	-0.0509668	0.00513123			-0.112786	1.618e-09	-0.189589	2.05616e-16																	-0.12899	1.52183e-08
Fam114a2																			-0.0488538	0.00363491
Fam117a																	-0.0854484	0.0010359	-0.0572925	0.00109478							-0.0957632	0.00943748
Fam117b	0.202257	4.3513e-05			0.144122	0.00955945							0.183245	2.96644e-22	0.0887229	4.43764e-10	0.101441	1.35281e-08	0.0825323	1.45937e-15	0.139716	6.19567e-26			0.0763624	0.00419076			0.16449	1.88252e-06									0.130744	3.70078e-21
Fam118a													0.0325623	0.00661995
Fam118b													-0.0291438	0.000919666	-0.0303573	0.000872587			-0.0320436	3.17484e-05
Fam120a																	0.0834257	0.00358073
Fam120b																	-0.0614712	0.00878992			-0.0564612	0.000151949																	-0.0434342	0.00660634
Fam120c																					-0.0200665	0.0095741
Fam129a																			0.066611	2.75673e-10
Fam136a													-0.0973081	2.00097e-07	-0.0825375	4.59075e-07	-0.101814	5.53318e-05	-0.109451	5.86854e-15	-0.161966	4.14946e-18			-0.188498	1.65394e-05													-0.121287	1.24935e-11
Fam160b1													0.0760897	0.00156002	0.108927	1.48814e-09			0.0960821	5.28298e-13	0.123993	9.63586e-14							0.230685	3.17589e-08									0.116764	1.14256e-11
Fam162a					-0.194433	0.00232045							-0.252972	6.03409e-27	-0.111379	6.14611e-07	-0.148992	1.39314e-06	-0.177823	5.0943e-28	-0.191479	3.80747e-19			-0.19726	0.000845297			-0.223359	0.000223866									-0.187546	3.47145e-19
Fam168b													0.116305	9.10185e-07			0.0972799	8.08399e-05	0.0401398	0.00557278	0.0729808	0.000667805																	0.0595595	0.00763773
Fam172a																	0.0919808	0.00250529
Fam173a																			-0.0550444	0.00193578	-0.113057	7.97234e-07																	-0.0727524	0.0034902
Fam173b													-0.0458952	0.00124257							-0.0379806	0.00378059
Fam174a													0.141333	4.97477e-06
Fam174b																			-0.0361037	1.77889e-06
Fam181b													-0.024352	0.00861028					0.0352697	9.77916e-09
Fam189b			-0.0279935	0.0098305																	0.0272097	0.00956342
Fam192a													-0.106697	9.97097e-08	-0.0435835	0.00088277			-0.0832034	8.1751e-08	-0.0765042	0.000262661																	-0.0653654	0.00380802
Fam204a													0.0705745	0.000570724			0.0771484	0.00087998	0.0565379	4.3012e-05	0.0713216	0.0012093																	0.0739812	0.000420657
Fam206a													-0.0274637	0.00478688			-0.0555554	0.000301529	-0.0506587	9.59566e-10	-0.0426508	0.000862542																	-0.0359975	0.00220966
Fam208a															-0.0768385	8.76593e-05			-0.0567743	0.000111629	-0.114722	9.51246e-10							-0.1748	0.000747977									-0.106	7.22647e-09
Fam208b																					-0.0472303	0.000866284
Fam210a																					-0.0697069	3.43658e-06																	-0.0441271	0.00323872
Fam210b																					0.0288867	0.0044001
Fam212a	-0.278977	0.00190493			-0.378744	7.7582e-12							-0.35347	1.71371e-37	-0.347096	2.53581e-77	-0.343171	1.26557e-34	-0.3206	8.62239e-92	-0.364285	1.02578e-80			-0.317272	6.36629e-16	-0.371056	5.79278e-08	-0.329861	1.12217e-13									-0.360053	1.11221e-78
Fam216a																	0.080635	0.00152175
Fam217b															0.0357468	2.07628e-06	0.0475327	0.0029001	0.0235103	0.00379266
Fam219b																			-0.0485638	1.23742e-05	-0.0438455	0.000444584																	-0.0350926	0.00675161
Fam220a																			-0.0478423	0.000583904
Fam221a																					0.0197832	0.00321111																	0.0184682	0.00980705
Fam222b															-0.03378	0.00102569
Fam234a															0.0274124	0.00440666			0.0259418	5.49118e-05
Fam234b															0.0286737	0.000393257	0.0366161	0.00128074	0.0366042	1.33071e-07	0.0442262	3.06818e-06							0.0275124	0.00646445									0.0466477	2.94273e-07
Fam241a					0.157372	2.2032e-05							0.108376	8.4779e-11			0.0647941	0.000182667
Fam26f															-0.0939861	5.68352e-12	-0.0774213	0.000236232	-0.0710173	2.0969e-13	-0.0813645	1.38119e-08																	-0.0827793	2.38258e-09
Fam32a															-0.133144	1.8929e-09			-0.108046	2.02749e-10	-0.140083	1.57322e-10																	-0.13245	6.51171e-10
Fam3c													0.0580862	0.00602148
Fam43a					0.135335	0.00623474							0.13768	2.02186e-09
Fam46a															0.0627953	9.36315e-07			0.0635909	0.000454782
Fam49a															-0.052186	1.51016e-05
Fam49b													0.0891255	0.00431189	0.0740574	0.00416591	0.0820117	0.00622305	0.104823	5.77426e-12	0.0330896	0.00391247																	0.0605384	0.00345756
Fam50a													-0.0747161	3.85614e-05			-0.0799882	0.00238807	-0.0326106	3.66079e-05
Fam53b																	-0.0607913	0.00512204			-0.0432541	0.00777944
Fam58b																	-0.0773357	0.00434005	-0.0806294	1.85021e-08	-0.065221	0.00136769																	-0.0666764	0.000461757
Fam60a																					-0.0749272	0.00165714
Fam69a															-0.0518205	0.000671339	-0.0770794	0.000415942	-0.0839967	2.61173e-12	-0.0667551	7.21002e-05																	-0.0652902	9.99061e-05
Fam69b													-0.0982152	6.41021e-05	0.180515	2.25443e-17			0.116377	1.06522e-10	0.198184	8.58256e-21							0.213901	0.000355278									0.1648	1.4105e-14
Fam72a																			-0.0186095	0.000163014
Fam76a													0.162898	5.986e-12			0.0879098	0.000503224	0.0548885	0.000436221
Fam76b																			0.0451655	0.000342901
Fam78a													-0.022642	0.00180978					-0.0241724	0.00441455	-0.0604417	1.89121e-09			-0.0553964	0.00874595													-0.0419139	1.12296e-05
Fam83d																			-0.0252891	1.51088e-06	-0.0251657	1.92908e-06							-0.17978	9.52464e-12									-0.0222107	9.12349e-06
Fam8a1													0.071787	0.000130312
Fam91a1													0.06407	4.2073e-05	0.0437818	0.00071391	0.0596221	0.00201992	0.0355449	0.00375683
Fam96a	-0.23345	0.00116566			-0.243076	0.000882138							-0.277831	1.22424e-26	-0.0860694	0.000100901	-0.0911308	0.00197963	-0.0754775	2.57464e-06	-0.0583491	0.00970717			-0.199764	0.0006956													-0.076019	0.000257283
Fam96b															-0.102153	2.29403e-08			-0.114356	2.78396e-14	-0.115076	8.66706e-09			-0.174036	6.5784e-05													-0.0958181	3.0623e-06
Fam98b																			0.038088	0.0013006	0.0523401	0.00336687																	0.0559008	0.00188518
Fan1															0.0303626	0.00363891																							0.0235181	0.00953598
Fancb																					-0.0219587	0.00305596
Fancd2																	0.0433609	3.47224e-05
Fancf													0.0336154	0.00341802			0.0483706	5.9127e-05
Fanci																			0.0202633	0.00973641
Fancl																			-0.0646954	8.25404e-10
Fancm																			-0.0348625	6.38157e-05
Farsa													-0.0982718	0.000265844	-0.0650914	0.000251249			-0.0570297	0.000770643
Farsb													-0.0881809	3.36227e-05	-0.0616263	0.00340591	-0.0821227	0.004489	-0.063442	0.000234938	-0.0647832	0.00464356
Fasn															0.0708042	2.28905e-07
Fastk																			-0.0318775	0.0035772	-0.0533347	0.00105847																	-0.0531269	0.000811419
Fastkd1																			-0.0224035	0.00209036	-0.0371034	6.95938e-05																	-0.0333969	0.000306104
Fastkd2																			-0.0423018	0.000178735
Fau													0.045783	0.000138281	-0.137187	3.06167e-62	-0.135907	2.52404e-34	-0.0577989	8.5006e-13	-0.119828	3.2792e-37	-0.202738	0.000653452	-0.115862	7.67241e-10			-0.103938	5.01819e-07									-0.123885	7.9953e-43
Fbl													-0.237292	4.89657e-13					-0.0841092	6.19331e-07	0.100511	1.58808e-05
Fbrs													0.0585192	0.00788224
Fbrsl1													0.0821902	3.54819e-06	0.0576231	3.63391e-06			0.0441405	9.80333e-06	0.0912754	1.05721e-12			0.0830065	0.000229859													0.0624681	4.78936e-06
Fbxl12													0.0829412	0.000137263
Fbxl14													0.134588	3.25016e-07			0.0894258	0.000280224
Fbxl15															-0.04062	0.00264061									-0.0746014	0.00189096
Fbxl17													0.0718159	9.24119e-05					0.0260649	0.00200019
Fbxl18																					-0.0294885	0.000439192
Fbxl3															-0.0714996	4.70498e-05					-0.0417859	0.000364057
Fbxl6													-0.0533121	0.0031412	-0.0570608	0.000142457			-0.0573939	0.000119777	-0.0782503	4.59945e-07																	-0.0579839	2.16087e-05
Fbxl8													-0.0385177	0.0010475	-0.0609094	4.23457e-08	-0.0640238	2.76765e-06	-0.0556167	2.50304e-12	-0.0678827	2.18619e-09							-0.101042	0.00180524									-0.0656083	8.76323e-10
Fbxo11															0.0516807	0.00265079			0.0896393	2.40768e-15	0.105632	3.99978e-12			0.0615449	0.00467328													0.0801287	8.26769e-08
Fbxo21													0.0982851	8.06397e-07	0.113371	1.05104e-17	0.0391718	0.000666758	0.0798495	1.23981e-14	0.124259	3.02984e-18							0.0813301	0.00166675									0.117857	1.73598e-15
Fbxo22													-0.0948614	3.97014e-06	-0.110796	4.06896e-10	-0.0892845	0.000409976	-0.0715042	8.11931e-07	-0.0902186	9.18974e-07							-0.122152	0.00546668									-0.0992063	7.73989e-08
Fbxo25															-0.0291765	0.000138859
Fbxo3															-3.86641e-06	0.00708868
Fbxo30															0.034746	0.00524508					0.030764	0.00585778
Fbxo31													-0.0216325	0.00458642	0.042803	1.91116e-05
Fbxo32																			0.019235	0.00155904
Fbxo33																					0.0705918	2.4672e-07																	0.0511172	0.000827592
Fbxo34															0.0325566	0.00684468
Fbxo4	0.0709387	0.00868767											0.0424642	0.00236081							0.0371112	0.000648725							0.0377589	0.0013646
Fbxo44													0.0316179	0.008482
Fbxo46																			-0.0334637	5.61911e-06	-0.0369568	0.000474548																	-0.0299635	0.00469182
Fbxo5																			-0.139472	9.49371e-18	-0.148872	3.87062e-13							-0.508142	3.32507e-18									-0.0974846	2.93945e-10
Fbxo7													-0.0541767	0.00107308	-0.0407559	0.00237933
Fbxo8													0.0259984	0.00602148	0.0423049	0.000899523
Fbxo9	0.641771	1.2212e-28			0.399385	1.32942e-16							0.539215	9.02497e-106	0.48899	2.76037e-134	0.494337	7.71624e-102	0.278242	2.76612e-72	0.29651	1.18195e-48			0.306191	1.71619e-11	0.472066	1.64085e-18	0.199876	8.3456e-05									0.354417	1.58612e-64
Fbxw11															0.0484364	0.000369593	0.0707189	0.000161115	0.0463218	0.000149916	0.0510903	0.00145354																	0.0636547	1.29093e-05
Fbxw4															-0.0631844	1.76847e-08	-0.0389299	0.00684924			-0.124003	4.22531e-16							-0.08784	0.00171732									-0.0916735	5.88758e-13
Fbxw7													0.0433669	0.00620709			0.0622935	0.00823727
Fbxw8																					0.0426831	0.00285718																	0.0403827	0.00470099
Fcer1g													0.12683	2.21679e-05					0.194332	3.41839e-24
Fcf1													-0.120287	5.39975e-06	-0.0753522	5.04827e-05	-0.0644051	0.00820303	-0.0764927	9.58344e-06	-0.0714726	0.00251721																	-0.0729193	0.0029351
Fcgr2b																			0.0500636	3.90517e-10	-0.0125052	0.00559612
[truncated: 4,858 more rows]

## Sheet: GCSF
primerid	logFC_HSC_Metabolism	adj_p-value_HSC_Metabolism	logFC_HSC_Quiescent	adj_p-value_HSC_Quiescent	logFC_HSC_Activated	adj_p-value_HSC_Activated	logFC_HSC_Interferon	adj_p-value_HSC_Interferon	logFC_HSC_Acute-Activation	adj_p-value_HSC_Acute-Activation	logFC_HSC_Cell-cycle	adj_p-value_HSC_Cell-cycle	logFC_HSC_pooled	adj_p-value_HSC_pooled	logFC_MPP0_surface	adj_p-value_MPP0_surface	logFC_MPP1_surface	adj_p-value_MPP1_surface	logFC_MPP2_surface	adj_p-value_MPP2_surface	logFC_MPP3/4_surface	adj_p-value_MPP3/4_surface	logFC_LSK_Primed	adj_p-value_LSK_Primed	logFC_LSK_Metabolism	adj_p-value_LSK_Metabolism	logFC_LSK_Primitive	adj_p-value_LSK_Primitive	logFC_LSK_Cell-cycle	adj_p-value_LSK_Cell-cycle	logFC_LSK_Acute-Activation	adj_p-value_LSK_Acute-Activation	logFC_LSK_Interferon	adj_p-value_LSK_Interferon	logFC_LSK_Interferon cell-cycle	adj_p-value_LSK_Interferon cell-cycle	logFC_LSK_Myeloid	adj_p-value_LSK_Myeloid	logFC_LSK_pooled	adj_p-value_LSK_pooled
0610009B22Rik	-0.0360942	0.0027929											-0.0426414	2.51577e-07					-0.0611146	5.91262e-05	-0.0813058	5.10238e-05							-0.136482	0.00522029									-0.0651308	0.00120615
0610009O20Rik													-0.0218076	0.00229115
0610010F05Rik																			0.0489009	2.33017e-05									0.0487726	0.00827562
0610010K14Rik	0.0780378	4.09376e-06											0.0541489	1.77473e-07
0610012G03Rik	0.0843924	1.76184e-05											0.0574319	3.45788e-07	0.075781	0.000134945	0.112269	4.17766e-12	0.0920498	1.88869e-12	0.0912298	7.03698e-06																	0.0915854	2.91025e-06
0610037L13Rik													0.0286828	0.00278739			0.0649974	0.0046123																					0.0503901	0.00505111
0610040B10Rik													-0.0150877	0.000643051					-0.0148121	0.00745628
1110004E09Rik	0.0758953	3.36113e-06			0.0776474	0.000327							0.0685103	2.3413e-12	0.0958892	1.79372e-07			0.0645986	2.87278e-05	0.113576	1.12465e-11	0.136812	8.71971e-05					0.074403	0.0080529									0.0984832	7.10959e-10
1110004F10Rik			0.0655702	0.00268178									0.0576611	9.12027e-08			0.0874468	0.000621832			0.0702565	0.000405738							-0.00688862	0.00368852									0.0694989	0.00139125
1110008F13Rik	0.10127	3.41048e-06	0.0768879	0.00450572									0.0901657	1.08399e-11							0.0814451	0.000166699																	0.0653309	0.00276948
1110008P14Rik															0.0402456	0.000840409	0.0429094	0.00354416			0.0321896	0.00646185																	0.0379656	0.00116363
1110012L19Rik													-0.0255403	0.00570835
1110019D14Rik													-0.0150695	0.00856055	-0.0344817	0.000324097			-0.0271935	8.17195e-06	-0.0374694	5.47738e-07							-0.0543702	0.00269155									-0.031206	0.000129717
1110032A03Rik	-0.047576	0.00164468			-0.0635558	0.00988682							-0.0523171	1.70509e-07	-0.0727189	8.8949e-06	-0.0945145	2.09036e-07	-0.0492105	8.40078e-05	-0.101781	1.07613e-12	-0.0955765	0.00336869	-0.0839703	0.000888806			-0.145784	0.000365827									-0.097116	5.2322e-12
1110038F14Rik	0.0539118	0.00441753			0.0772184	0.00695747							0.0647945	4.96656e-08
1110051M20Rik	-0.0214685	0.00411667													-0.0400357	0.00874873			-0.0393039	1.90651e-06	-0.033022	0.00493068																	-0.0325303	0.00798642
1110059E24Rik													-0.0254506	0.00413461							0.120039	9.67597e-10	0.11329	0.00559287															0.0870252	9.72169e-06
1110059G10Rik			-0.0213181	0.00408137
1110065P20Rik			0.0501294	0.00424711									0.0239148	3.6321e-05	0.0893557	4.85569e-08	0.0633804	0.0027423	0.0526643	6.73912e-05							0.154183	0.00014495											0.0561724	0.000651129
1190007I07Rik			-0.0624814	0.001129									-0.0375056	0.00083422
1500009L16Rik	-0.123999	8.7887e-27	-0.0848489	1.12643e-07	-0.0951	1.3712e-09							-0.105278	8.18758e-43	-0.16988	1.10192e-21	-0.199033	8.35271e-19	-0.104011	6.68098e-11	-0.151875	3.30993e-18	-0.12022	1.94004e-05	-0.131229	0.000425868	-0.121902	0.00043024	-0.262517	3.7799e-07									-0.155255	6.09508e-20
1500011B03Rik																					-0.0572725	0.000167547
1500011K16Rik															0.0672707	9.63422e-05			0.0370071	0.0045259																			0.0360309	0.00488553
1700003C15Rik																					0.0339857	0.00206676
1700008J07Rik																			-0.0231616	0.00631344					-0.0804938	0.0012509
1700017B05Rik																			0.06014	0.000367457
1700020I14Rik																			0.060078	0.00265996
1700021F05Rik	0.0320661	0.00618141											0.0137359	0.00385926	0.0437668	0.00893162			0.0383421	0.000133537
1700025G04Rik													0.0297643	0.00193479	0.0921511	1.9453e-05			0.0717332	2.44435e-05	0.0663044	0.00545696			0.12798	0.00832268													0.0698305	0.00101915
1700029J07Rik															-0.0337581	0.000206685
1700096K18Rik	-0.0374838	0.000157746											-0.0350619	7.10652e-08					-0.0453393	9.27364e-08
1700097N02Rik	-0.0284041	0.00367443											-0.0243807	4.47429e-05	-0.0757236	1.36358e-07	-0.0535296	0.000778155	-0.0372423	0.000242224	-0.0517535	0.00013194					-0.101829	0.000266745											-0.0688415	3.28479e-07
1700109H08Rik																			-0.0107156	0.0031327	-0.021776	0.00547758
1700113A16Rik	-0.0549498	4.86992e-07											-0.0357691	2.25004e-07	-0.0331429	0.00539397
1700123O20Rik																					-0.0735299	0.000648446
1810010H24Rik	-0.021632	0.00105396			-0.0304632	0.00118155							-0.0277707	8.13824e-10
1810011H11Rik	-0.0329876	9.02867e-06											-0.0296839	3.52553e-09	-0.0802614	7.99148e-11	-0.0618281	5.29454e-06	-0.0530457	3.28731e-12	-0.0572521	7.07971e-07	-0.110045	9.73554e-07			-0.108754	0.000786188											-0.0704987	1.41171e-10
1810013L24Rik	0.0218277	0.000699556											0.0139999	0.00691227					0.0059973	0.00784773
1810022K09Rik	0.092775	2.97826e-08											0.0712707	2.82386e-11	0.103368	9.66527e-08	0.091981	9.54009e-05			0.0873752	0.000324393					0.14428	0.0058311											0.104815	2.73437e-06
1810032O08Rik															0.06856	0.000312357	0.0460555	0.000949536	0.0715027	1.00169e-08	0.081502	6.14871e-06																	0.0807958	3.34472e-06
1810037I17Rik	-0.216558	4.20147e-24	-0.0814317	0.00258144	-0.147162	3.72127e-08							-0.158238	2.96132e-32			-0.141554	4.80732e-08	-0.113428	3.6773e-09	-0.112579	1.70885e-06							-0.229285	0.00213469									-0.0877243	0.00040287
1810043G02Rik	-0.0359982	0.00206948	-0.0265914	0.00586423									-0.030237	8.57688e-06					-0.0436955	3.6795e-06			-0.0940261	0.00793131
1810044D09Rik													-0.0217932	1.5733e-05							-0.0345565	0.00035916																	-0.0334246	0.000366822
1810058I24Rik													0.0316511	0.00408641					-0.0400985	0.00541857
2010107E04Rik																			-0.0663994	0.000592696	-0.103431	1.5238e-06			-0.195303	0.000294213													-0.0763222	0.000758985
2010111I01Rik	0.0826874	6.66612e-11	0.0749919	2.39609e-05	0.0725265	3.04642e-07							0.0758349	1.57404e-21	0.121572	6.28912e-14	0.113456	3.79e-11	0.136146	9.82565e-28	0.121785	7.5828e-13	0.12491	0.00185222	0.104126	0.000174816	0.133195	0.00368693	0.182418	2.34466e-05									0.125936	1.06255e-14
2010315B03Rik													-0.0208561	0.0046846
2010320M18Rik			-0.0387297	0.00128551									-0.0324203	9.68183e-08					-0.0391148	6.2593e-05
2300009A05Rik					0.0745503	0.00153588							0.037894	0.000497287	0.0745305	5.38218e-05	0.0487346	0.000617987																					0.0406406	0.00528578
2310001H17Rik	-0.146027	5.90677e-18	-0.135129	9.49382e-08	-0.140022	7.90931e-09							-0.145086	3.48678e-36	-0.100068	9.24476e-09	-0.137934	5.12543e-13	-0.0616493	7.63334e-07	-0.0800167	3.858e-09	-0.11417	4.68661e-06			-0.144117	0.00196197											-0.0957136	1.63024e-11
2310011J03Rik			0.0642763	0.000177045									0.036825	2.09423e-06					0.0534286	2.05815e-05	0.0827807	0.000101881							0.17045	0.00253381									0.0770986	4.34049e-05
2310022B05Rik					0.0364734	0.00606705							0.0178482	0.00180879			0.0439716	2.8567e-05
2310033P09Rik	0.094201	1.86156e-06	0.115187	8.53529e-07									0.0958234	6.9817e-16	0.101308	2.61468e-07	0.0893479	0.000779697	0.0936442	3.19148e-08	0.15369	3.28062e-13	0.163906	0.000312385	0.153345	0.000965067													0.138062	3.17524e-12
2310039H08Rik	0.0688578	0.00213266	0.0671973	0.00034189									0.067178	2.32679e-09	0.15072	2.15747e-13	0.0849693	4.89619e-05	0.0489044	0.000241754	0.110276	2.81066e-08	0.126993	0.00546636															0.106759	1.37552e-08
2310057M21Rik			0.0397365	0.00118519									0.0218112	0.0032032					0.041192	1.0449e-05
2310061I04Rik													0.0346203	8.35487e-05	0.0430378	0.00281441			0.0349656	0.0061506	0.0809728	2.89496e-06																	0.0646929	0.000100456
2310068J16Rik																	0.0333437	0.000382321
2410002F23Rik			0.0615705	0.00113321	0.0837906	0.000484436							0.0645907	1.21041e-08	0.189093	2.49375e-19	0.112401	1.29553e-05	0.109732	8.94343e-13	0.176689	2.81047e-16	0.22787	7.75963e-08			0.177055	6.27766e-05											0.163074	4.55853e-15
2410004B18Rik																			-0.00647064	0.00431741
2410015M20Rik	0.027915	0.00464766	0.0310332	0.000319699									0.0440146	8.95921e-08	0.0728581	0.000300846
2410089E03Rik															-0.0365489	3.72972e-05
2410131K14Rik																			0.0206641	0.0025557
2510046G10Rik																							-0.0915209	0.00843638
2610001J05Rik															-0.0584449	0.00772202
2610002M06Rik													0.0397363	2.09773e-05			0.032742	0.000189811
2610008E11Rik																			-0.0315561	0.000175081	-0.0574795	5.43225e-08							-0.0877968	0.00648795									-0.0543285	5.40752e-07
2610020C07Rik																	-0.0268801	0.00398215	-0.0155818	1.51308e-08	-0.0340905	6.40032e-05																	-0.0241798	0.00262618
2610035D17Rik	-0.0792978	1.4374e-08	-0.0649333	0.000580507	-0.0693661	0.00164419							-0.0814233	2.19071e-18	-0.119449	2.63342e-13	-0.0936081	3.51584e-07	-0.0803855	2.23138e-15	-0.11342	8.45467e-15	-0.125879	6.76577e-05	-0.0829331	0.000112026	-0.101777	0.000354258	-0.134471	0.000122984									-0.118312	4.13017e-18
2610507B11Rik																			0.0487775	0.00207657
2610524H06Rik	-0.0526637	0.00335579											-0.0410009	0.000406201	-0.0655983	0.00532707			-0.0588943	0.00243367	-0.076077	0.0020451
2700038G22Rik					0.0353407	0.00783564							0.0325398	2.25876e-07	0.0640028	6.35256e-07	0.0805423	1.82229e-07	0.0725598	6.14439e-11	0.0910748	3.25545e-08							0.131755	0.00111162									0.095899	9.08759e-11
2700049A03Rik													-0.0198212	0.00772052	-0.0493669	0.000992185					-0.0562743	0.00266434																	-0.0581208	0.000106019
2700097O09Rik			0.0225803	0.00755347									0.018718	0.000277934			0.0175058	0.00155554
2810001G20Rik																			-0.0310454	0.000609639
2810004N23Rik	0.0891371	5.05508e-05											0.0727667	4.01159e-09	0.139311	6.65531e-11	0.108194	1.82707e-05	0.146383	4.44315e-19	0.148601	3.3964e-11	0.136328	0.00536247					0.185095	0.0005459									0.128999	1.83851e-09
2810006K23Rik	-0.0438516	0.00230422											-0.0416791	1.506e-06	-0.0528558	0.00403833					-0.0450225	0.000886679
2810402E24Rik													0.0227104	0.00376235
2810403A07Rik	-0.0793616	0.000467293			-0.121002	7.05458e-05							-0.0797617	2.828e-09	-0.113446	4.29828e-07			-0.0674283	8.83778e-06
2810474O19Rik	-0.0788783	0.000464301			-0.0853551	0.0019242							-0.0729738	2.10263e-08	-0.132903	1.49982e-07			-0.113272	5.22292e-10	-0.14932	2.23916e-10	-0.176938	0.000104954					-0.204925	0.000232959									-0.145214	1.40977e-10
2900026A02Rik													-0.0322644	4.88231e-06	-0.0604297	6.90871e-06	-0.0470903	0.000379198	-0.0398317	6.71933e-05																			-0.0353564	0.00564921
2900076A07Rik													-0.0129256	0.00505356
2900093K20Rik													-0.0146111	0.00367378							-0.0242201	0.00834573
2900097C17Rik	0.0780369	7.06394e-05											0.0558722	1.07942e-05					0.0704919	0.000144668	0.0643779	0.00492669
3010003L21Rik															0.0323665	0.00642246
3110062M04Rik	-0.0480294	0.00151809	-0.0625904	0.00465423	-0.0534782	0.00785493							-0.0541399	3.09677e-09	-0.0485111	0.00136926	-0.0949413	1.16256e-06	-0.0681518	2.74643e-08	-0.0580463	3.49661e-05	-0.0829386	0.00626806	-0.0646419	0.00962894													-0.0698589	1.23436e-07
3110082I17Rik	0.0381561	0.00182221											0.0344673	7.50711e-07	0.0587647	5.83754e-05			0.0715649	8.71644e-09	0.0725636	1.1634e-05							0.121254	0.000183172									0.068752	2.02954e-05
3830406C13Rik	-0.0670024	0.000307895			-0.0795617	0.000698621							-0.0710979	4.23793e-11	-0.0742635	0.000526497			-0.0769244	1.41509e-07	-0.0821907	2.43281e-05																	-0.0706512	0.000187015
4632404H12Rik	0.0229752	0.00630289											0.0145232	0.00110391
4732440D04Rik																					-0.0314189	0.000152043																	-0.0334424	0.000446486
4833403J16Rik													-0.0357515	4.51121e-06			-0.0382883	0.00350819	-0.01972	0.00305821
4833407H14Rik															-0.0415911	0.000195066	-0.0256826	0.00268991			-0.0409831	0.000163827																	-0.0306807	0.00278798
4833418N02Rik					-0.0160527	0.00364768									-0.0316069	0.00317509			-0.0244717	5.37013e-05
4833420G17Rik			-0.0774315	0.00182103									-0.0564002	1.76366e-05	-0.128883	3.64043e-09	-0.0765221	0.0064647	-0.0946281	4.87905e-08	-0.0971138	1.00865e-05	-0.119726	0.00626806			-0.156442	0.00251846											-0.122235	2.29176e-09
4833439L19Rik	0.0343171	4.25434e-05	0.041338	0.000150421									0.0342579	6.21072e-11	0.0623189	2.38533e-07	0.0309276	0.000400649	0.0533102	2.45433e-06							0.10601	0.000624664	0.104705	0.00131892									0.0463722	0.000139464
4921524J17Rik													-0.0484744	6.33266e-06			-0.072398	0.00134254	-0.0975584	8.59426e-12
4930430F08Rik													-0.0216252	0.0032981	-0.0292069	0.00221868
4930447C04Rik																			0.0214253	0.00200389
4930453N24Rik	0.0216514	0.00811353
4930481A15Rik	-0.0588982	6.5608e-09	-0.0825665	1.60809e-07	-0.072829	2.93156e-06							-0.0708645	9.78161e-25	-0.076616	1.2745e-10	-0.0639352	3.67758e-07	-0.0524062	5.82627e-13	-0.0602633	5.70706e-11	-0.0669159	0.00152036	-0.0438669	0.000733009	-0.0816397	0.00232822											-0.0717209	5.42465e-14
4930503L19Rik													-0.0200285	0.00527863
4930519L02Rik															-0.0716747	0.000303224			-0.066864	8.08029e-05	-0.051787	0.00035352																	-0.0538771	0.00447474
4930523C07Rik	-0.0483336	5.16443e-06			-0.0502889	0.00896674							-0.0497105	9.5409e-12	-0.0999571	9.87327e-11	-0.0920832	1.87633e-07	-0.103416	8.04899e-17	-0.157556	5.57169e-24	-0.131567	1.92329e-06	-0.107208	0.000234715			-0.24046	7.21359e-07									-0.135396	1.19148e-20
4930555A03Rik													-0.0286676	6.91508e-05	-0.043029	0.000679792
4930579G24Rik																			-0.0299533	0.00831476
4931414P19Rik																					-0.0283676	6.42249e-06			-0.0214474	0.00596273													-0.021745	0.00165802
4931428F04Rik															-0.0302208	0.00207299			-0.0232735	0.00391445
4932438A13Rik																					-0.055276	0.00473959
4933404O12Rik																					-0.0270489	0.000406904																	-0.0218937	0.00241733
4933434E20Rik	0.0766866	0.000454968	0.0978304	8.35335e-05									0.0760342	1.53176e-09	0.0693226	8.67664e-06			0.10261	1.53002e-10	0.0887993	4.05013e-05																	0.0711603	0.000334302
5031425E22Rik			-0.0788545	0.00382067									-0.0671425	1.29371e-08	-0.0488663	0.0079594			-0.060672	1.84419e-05	-0.0797381	1.40853e-06							-0.122908	0.00895264									-0.0821149	9.59148e-07
5033406O09Rik	-0.162735	8.10134e-19	-0.0822953	0.00423761									-0.119885	1.17635e-22	-0.15199	3.8269e-15	-0.112978	3.78228e-06	-0.138185	1.64147e-23	-0.0910132	1.0399e-07	-0.1461	4.19249e-05	-0.11997	0.000188663													-0.116236	1.1985e-11
5430403G16Rik																					-0.0310922	0.00968755
5430416N02Rik													0.0330977	5.58581e-05			0.0395594	0.00171992	0.0421421	2.62044e-06
5430427O19Rik															-0.0420874	0.000562589	-0.0392876	0.000816576	-0.0365367	0.000739452	-0.0764877	4.61561e-06					-0.0605308	0.00722516	-0.131097	0.00222861									-0.0675285	7.62027e-07
6030458C11Rik													0.019385	0.00383013	0.0323089	0.00675858			0.0422629	4.09472e-07
6330418K02Rik																			-0.014861	0.00738142	-0.0385318	0.000527053							-0.0592775	0.00401602
6330562C20Rik	-0.0381828	0.000111962											-0.0221348	6.60913e-05					-0.0223426	0.0089148
6720427I07Rik																	0.0121046	0.00389865
9130401M01Rik			0.041106	0.000520292									0.0397794	2.36672e-05	0.163976	7.12033e-18	0.132486	4.68445e-09	0.116686	1.90725e-13	0.111815	4.30219e-08			0.140117	0.00624497	0.142806	0.00698423	0.145471	8.19409e-06									0.143258	5.64739e-13
9430038I01Rik	0.0646246	3.91263e-06			0.0630415	0.000767924							0.0544188	4.6695e-12	0.0697578	2.47963e-05	0.0615386	6.24026e-05	0.0499382	4.06426e-05	0.0713844	5.96877e-06																	0.0670755	1.46004e-05
9530068E07Rik													0.00351983	0.000709632	-0.00660348	0.00363172
9930021J03Rik													0.030543	0.00279502
9930104L06Rik																			0.00781396	0.00179682
9930111J21Rik2	-0.0447492	2.63498e-06	-0.0610417	6.26238e-05	-0.059956	0.000107346							-0.0570922	5.32524e-18	-0.108559	5.44545e-13	-0.0419404	0.000690546	-0.039355	0.000123302	-0.154437	1.64899e-18	-0.157015	1.91078e-06	-0.0878379	0.00015044													-0.120232	2.02977e-15
A130010J15Rik																			0.0235634	0.00355379
A230050P20Rik															0.0235792	0.00339138			0.055118	2.81896e-06	0.0604681	3.52846e-05	0.0516888	0.00641489															0.0462331	0.00123245
A430033K04Rik																					-0.0203883	0.0049281
A430046D13Rik					-0.0568138	0.000217552							-0.0334477	2.39153e-07	-0.0713524	1.00038e-07			-0.0471538	3.27083e-06	-0.0961599	2.6759e-13	-0.098107	0.000174438					-0.129521	8.18676e-05									-0.0812772	7.74109e-11
A430078G23Rik													-0.0180841	0.00154803	-0.0420433	0.00328775					-0.0246179	0.00323116
A630072M18Rik			-0.0525587	0.000196936									-0.00672344	0.00407996							-0.110301	2.18205e-06																	-0.0775031	0.000962909
A630089N07Rik															0.0879791	3.75194e-09			0.0637072	1.57236e-07	0.0574113	0.00999422
AA467197															0.02118	0.000318397					0.0425403	2.05901e-06	0.0455138	0.00498188															0.0353894	2.86392e-06
AC129328.1	0.02283	0.00780373											0.0123976	0.00364537	0.0239998	0.00661626			0.0219175	0.00760644
AC149090.1	-0.0813938	0.00326606											-0.0753448	2.61855e-06	-0.175329	1.81874e-12	-0.158966	8.20802e-08	-0.123059	2.93495e-10	-0.209444	6.20605e-19	-0.250649	6.91399e-08	-0.199008	9.11093e-05			-0.132184	0.000616379									-0.170223	3.5142e-14
AC153891.1																					-0.0266008	0.00205958
AC160336.1															-0.119611	2.38474e-08
AI314180					0.100257	3.19655e-05							0.052456	2.74987e-05			0.0742735	0.0091415	0.0466451	0.00142921																			0.070251	0.00421296
AI413582	-0.0599857	7.39275e-06											-0.0432145	8.95188e-07
AI467606															-0.0665032	0.00363328					-0.0498748	0.000932207																	-0.0525845	0.00825197
AI480526					-0.0388817	0.00431779							-0.0394532	1.15734e-07	-0.0568904	3.22709e-05	-0.0758539	8.21422e-08	-0.0324578	2.91586e-05	-0.0706818	2.27577e-07																	-0.0681641	1.75449e-08
AI597479													-0.0131019	0.00613705
AI837181																					-0.0795216	3.93675e-05																	-0.0601284	0.00190914
AI854703																													0.0367972	0.0040519
AI987944															-0.0372715	0.00117264
AL590144.2	-0.0404494	0.000238792	-0.067876	9.58757e-06	-0.0714681	1.59219e-05							-0.0598133	2.15648e-17	-0.034615	1.06665e-05	-0.0306573	0.00550838	-0.0243541	8.84209e-06	-0.0374839	3.24209e-08	-0.0421866	0.00029463															-0.0347339	9.03545e-08
AU019823													0.013963	0.00716535			0.0390425	0.0074336
AU020206	-0.0764243	7.14289e-06											-0.050675	5.20501e-07	0.0604548	0.00198372			0.0441643	0.0083212
AU022252	0.0350817	0.00565748			0.0468883	0.000768853							0.0304458	1.66128e-06
AU040320																																							-0.0295373	0.00573588
AU041133													-0.015656	0.00102955
AW011738			0.0339361	0.000150575
AW112010	-0.108522	7.33271e-05			-0.100805	0.00301326							-0.100329	3.06883e-11	-0.111059	0.000120752	-0.0951608	0.00163027			-0.156782	4.76616e-10	-0.158029	0.000849852															-0.126385	4.04539e-07
AW549877															-0.0401511	0.000180157			-0.0313259	0.00014326																			-0.0412478	0.000320161
AY036118	-0.0610994	4.38536e-06	-0.0819284	1.01766e-08	-0.0886681	2.03479e-07							-0.0751776	7.46181e-22	0.0161012	0.000885538	0.0670347	1.57379e-07	0.0486141	9.90002e-08	0.0637687	3.67224e-12			0.0391017	0.00239606													0.0368308	1.27504e-08
Aaas															-0.0168101	0.00546739			-0.0326111	0.00438975
Aacs															0.040973	0.00585371			0.0255841	0.00224007	0.0262203	0.00128229																	0.0339312	0.00169943
Aaed1	-0.0550801	0.00096312	-0.0753197	0.000883699	-0.0999126	2.4461e-06							-0.0781049	3.20112e-14	-0.122183	6.66198e-10	-0.0819145	5.71831e-05	-0.0831637	2.00741e-11	-0.110203	8.78738e-10	-0.156976	1.10083e-05															-0.10247	2.4661e-09
Aagab					-0.056083	0.0040056							-0.0315562	0.000724197
Aak1																					-0.0578121	3.15957e-05																	-0.0443946	0.001894
Aamdc	-0.0649527	5.72531e-05											-0.048851	2.00049e-06	-0.0562512	0.00611906	-0.0697984	0.00258358	-0.0508616	0.00118859	-0.0525805	0.00991108																	-0.0566547	0.00322487
Aamp	0.141337	1.25826e-13	0.114452	1.35251e-07	0.179928	1.95691e-11							0.143212	8.95236e-33	0.0738153	0.00739425	0.0894206	0.000758738
Aars	0.165137	1.51239e-34	0.0893436	3.87964e-12	0.152786	2.20989e-19							0.141163	1.52374e-69	0.239516	1.43482e-50	0.186677	1.74149e-30	0.17803	1.26966e-45	0.180702	2.28852e-29	0.197848	1.58118e-08	0.130982	1.04388e-05	0.220052	1.55567e-09	0.25952	1.16484e-08									0.191541	9.35883e-36
Aarsd1																			0.0254146	7.72571e-05	0.032245	0.000128827	0.0563528	0.00426413															0.0376909	2.96864e-08
Aasdhppt	0.0907093	6.23918e-07	0.0903689	6.40771e-07	0.0787645	0.000427226							0.0899107	6.58248e-19	0.0925204	4.74661e-06	0.134241	2.509e-10	0.0859486	7.06864e-10	0.174869	3.43786e-20	0.152719	0.000190626	0.169174	6.19117e-05			0.173876	0.00126915									0.148511	1.94559e-15
Aatf	0.0973998	6.41696e-07			0.0864858	9.20464e-05							0.0869831	3.4818e-16	0.254676	7.3804e-51	0.163907	7.46534e-17	0.183264	2.91609e-35	0.175827	2.26193e-19	0.137713	0.00128047	0.219977	6.99218e-09	0.228488	1.77816e-07	0.225167	6.69957e-07									0.199716	2.61119e-28
Abca1					-0.0379688	0.00100647							-0.0229678	7.0884e-07	-0.0444906	7.04224e-09	-0.039165	6.35157e-07	-0.0335343	3.67678e-14	-0.0365334	2.88584e-09			-0.0239902	0.00968333	-0.0695234	0.00119884	-0.0489601	0.000118208									-0.0412191	1.21527e-12
Abca2	-0.0520328	5.11911e-05											-0.0370853	3.65175e-06					-0.0642889	4.3367e-07
Abca3													-0.0250807	0.00148893					-0.0160802	0.00807258
Abcb4															-0.034861	0.000110661			-0.0373837	1.9985e-06
Abcd1																			-0.0407205	1.21644e-05	-0.0502896	0.000182694																	-0.0365012	0.00679711
Abcd4	-0.0343314	0.00186489											-0.0258488	0.000212717	-0.047623	0.000202622	-0.0437034	0.000675177	-0.0232438	0.0031662																			-0.0302225	0.00767162
Abce1	0.237178	8.36039e-32	0.167971	9.01074e-16	0.238754	8.16177e-27							0.227784	1.81631e-82	0.311964	2.217e-47	0.333074	2.28586e-52	0.306635	7.1441e-82	0.257218	2.29202e-33	0.237522	3.27502e-09	0.220983	1.02243e-07	0.294047	4.17853e-10	0.42717	1.13357e-17									0.280161	1.17195e-42
Abcf1	0.170569	1.26665e-15			0.166008	2.65464e-10							0.131921	3.72274e-26	0.207051	5.47707e-20	0.17514	1.51284e-13	0.186828	2.97242e-31	0.178467	1.26327e-16	0.158957	0.000124309	0.185484	0.000302132	0.145273	0.0066342	0.320687	1.93078e-07									0.178814	6.27799e-18
Abcf2	0.144523	8.51214e-18	0.0960022	2.41725e-08	0.120519	8.17421e-10							0.132005	3.36943e-41	0.247442	1.33053e-40	0.23923	3.74322e-30	0.201684	6.9243e-39	0.205116	1.3423e-23	0.211513	6.11392e-07	0.217395	5.68666e-07	0.246707	7.61078e-09	0.258868	1.88031e-07									0.2265	1.20389e-29
Abcf3	0.0416008	0.00105329											0.0384436	1.43313e-05			0.0324256	0.000323855
Abcg1	-0.0530822	0.000104054	-0.101523	7.25463e-09									-0.0635656	3.05304e-14	-0.138508	1.10236e-13	-0.118909	1.32697e-08	-0.103597	1.31713e-13	-0.111674	9.92994e-11	-0.102456	0.00740774	-0.0941647	0.00154077	-0.148735	0.00254541	-0.186732	6.4674e-06									-0.135233	6.65535e-17
Abcg3	-0.0973481	4.41773e-16	-0.126245	3.06436e-10	-0.107636	1.2851e-09							-0.113218	1.40736e-40	-0.0542039	2.25613e-08	-0.0702146	3.0604e-08																					-0.0266144	2.65594e-05
Abhd11													0.0362527	0.00143828	0.118637	2.47189e-09	0.0936101	1.14045e-05	0.0485751	0.00347118	0.097118	5.26184e-07					0.146842	0.00115806											0.101706	2.6795e-07
Abhd12																					-0.0479372	0.00545266
Abhd13															0.0288574	0.00484681
Abhd14a															0.00342262	0.00370531
Abhd14b	-0.0498599	0.00206411			-0.0544385	0.00907104							-0.0553185	8.46207e-09	-0.083549	2.61903e-07	-0.0695855	0.000312355	-0.0432573	0.000188434	-0.0637038	0.000113582																	-0.0654161	4.05135e-05
Abhd17a															0.0855294	0.000166632			0.0520051	0.000744643
Abhd17b	0.0446919	4.05704e-05	0.0544887	0.00373236	0.0742872	0.00157778							0.0544026	8.01226e-10	0.115846	2.01254e-10	0.0761798	3.23226e-05	0.0966144	1.33791e-09	0.214388	1.81925e-18	0.234033	9.93709e-08	0.105792	0.00924097			0.178019	0.00326302									0.162197	1.21848e-13
Abhd17c	0.0514284	9.7957e-06	0.0209825	0.0011209									0.040266	7.31161e-11	0.0824963	2.55606e-07			0.0655536	4.86041e-08	0.0831339	6.86734e-08	0.116573	0.0011775	0.106304	0.00120874													0.085025	1.43008e-08
Abhd18	-0.0298677	0.00119306											-0.0278314	4.34761e-05					-0.0281946	4.19285e-05	-0.0395287	1.08946e-05																	-0.0383289	4.61933e-05
Abhd4																			-0.0507308	2.90747e-05	-0.0609451	3.48677e-05																	-0.0500432	0.000823782
Abhd6																					-0.0223018	0.00485048
Abhd8													-0.0362351	0.00272664					-0.0532756	8.74784e-05	-0.0805559	9.12417e-05
Abi1																					-0.08612	2.65615e-08	-0.125996	0.000714812															-0.0535042	0.000837773
Abi2																			0.0620042	1.05821e-10
Abi3	0.0514499	0.000107966	0.0576461	0.000155596									0.0465172	4.46572e-09	0.0661442	2.23648e-05			0.0435448	1.45159e-05							0.0980476	0.00563993											0.0460668	0.00118732
Abl2													0.0198039	0.0037586					0.0382966	0.000286859
Ablim1					0.0130376	0.00405899
Abr	-0.0344894	0.00679406											-0.0230472	0.00775956
Abracl															0.0738215	0.00042213	0.0530223	0.00294507			0.0673596	0.00249937																	0.0807825	0.000108009
Abtb1	-0.0365445	2.06752e-05	-0.0393743	0.00678199									-0.0339803	1.4789e-08	-0.0672788	8.59939e-08	-0.0670077	7.85532e-08	-0.0565687	1.33445e-10	-0.09768	7.89356e-16	-0.0815394	0.00306704			-0.0915819	0.0093947	-0.142061	3.46316e-08									-0.0956663	2.31762e-17
Acaa1a																	-0.0628507	0.00710124	-0.0407487	0.00990019
Acaa2	-0.065941	0.000618153	-0.09433	1.15509e-05	-0.0794299	0.00089951							-0.0797552	1.1697e-13	-0.0825252	0.000114544	-0.0749252	0.00313553	-0.11668	4.5105e-13
Acaca															0.0404126	0.00823871	0.0470486	0.00170855			0.0615611	0.000128375																	0.0475289	0.00128002
Acad10																																							-0.0226106	0.000251671
Acad11													-0.0145848	0.00753353					-0.032635	2.52689e-05
Acad12	-0.0267852	0.00188698	-0.0434203	0.000442889									-0.033669	1.85956e-09	-0.0351657	0.000117778	-0.0389062	6.72075e-05	-0.0253202	1.83386e-05	-0.035104	5.4825e-06	-0.0510124	0.00273371															-0.0353734	3.60615e-06
Acad8	-0.0302188	0.00384236											-0.0223347	0.00130757	-0.0330962	0.00971936
Acad9																	0.0191918	0.00818791
Acadl													0.0109586	0.00177038			0.0724712	0.00315731																					0.0816403	0.00193279
Acadm	-0.143734	3.23457e-15	-0.097396	0.000146138	-0.143711	6.95991e-08							-0.134558	2.44723e-28	-0.181003	3.5052e-15	-0.163054	1.89661e-11	-0.131583	5.19175e-16	-0.102756	6.39234e-06			-0.1342	0.00303376													-0.118058	2.79805e-08
Acads	-0.0717749	1.68631e-05											-0.0468253	5.05792e-06			-0.0708592	0.00646924	-0.12358	3.23865e-14	-0.0674564	0.0015211																	-0.0771945	0.000141624
Acadsb	-0.0376175	0.00111561											-0.0435896	2.82098e-09	-0.0408524	0.00394135
Acadvl																			-0.0514842	1.79949e-05
Acap1	-0.0670005	0.00113388											-0.040601	0.00235998					-0.0757131	3.55575e-05	-0.0761291	0.000400403																	-0.0741286	0.000462432
Acap2	-0.0464537	0.00101477
Acat1	-0.0490243	0.00409258											-0.0457035	0.00131234	-0.0560564	0.00993226			-0.0688867	9.88457e-05	-0.0735854	0.00626549
Acbd3	0.0602723	0.000335526											0.0424535	7.21068e-06	0.103536	3.45746e-08	0.0803019	0.000117931	0.0714713	5.24494e-07																			0.0683869	0.000252075
Acbd5																	-0.0593536	0.000201955	-0.045582	3.25464e-06	-0.0431262	0.00807695	-0.0818624	0.0025595															-0.0461248	0.00149922
Acbd6	0.126883	1.59259e-10	0.103318	3.84668e-06	0.0842828	0.00479818							0.108785	1.57914e-20	0.103281	3.85822e-06	0.10357	3.29002e-05	0.0682867	0.000306928	0.0868011	0.00021232			0.168126	7.63874e-06													0.0863484	8.307e-05
Accs	-0.0298676	0.00032979			-0.0381564	0.00685729							-0.0321773	8.3906e-09			-0.0611485	4.8871e-05	-0.0683905	5.45873e-14	-0.0876339	2.80136e-14	-0.0835983	0.00548858	-0.0712767	5.25728e-05													-0.0690754	4.47327e-10
Acd													0.0196853	0.00133711					-0.0430611	0.00284432
Acer3																			0.0457828	2.66621e-05	0.0471111	0.00070953
Acin1	0.0784266	0.000590852			0.127361	6.01802e-07							0.0820468	1.66313e-10	0.170696	2.01188e-11	0.143664	1.42395e-08	0.127971	1.32984e-16	0.0762394	0.00322281			0.154465	0.00281061	0.141728	0.00485811											0.12307	3.34332e-08
Aco1																	-0.0180346	0.00196159
Acot1	-0.0705758	1.17025e-05	-0.0695121	0.00171431	-0.0769616	0.00137233							-0.0743713	1.26067e-13	-0.124191	3.60632e-09	-0.0763154	1.15943e-05	-0.075775	9.55319e-13																			-0.061992	0.00122885
Acot13	-0.08456	6.64303e-09	-0.0720688	5.13504e-05	-0.0897405	7.37747e-06							-0.0857102	3.00642e-20	-0.0806769	1.06735e-05	-0.0899813	3.94914e-05	-0.0628886	5.5313e-06	-0.0698652	0.000228365	-0.123155	0.00147669															-0.0815899	1.57569e-06
Acot7	-0.144172	8.79476e-15	-0.133719	7.49371e-09	-0.143798	3.01985e-08							-0.148114	1.47665e-34	-0.173104	2.67493e-17	-0.165629	5.97479e-12	-0.0998342	1.40621e-08	-0.134313	1.43684e-09	-0.120152	0.00953623			-0.209294	7.42147e-07	-0.163901	0.00774257									-0.152597	4.13894e-13
Acot9	0.0466812	0.00629968	0.062876	0.00138573									0.0448883	1.42729e-06			0.0295015	0.000773491	0.0487176	0.00117635	0.0555299	0.000573334			0.0877397	0.00737215													0.050821	0.00245688
Acox3															-0.0387811	0.00226876			-0.0471542	3.78002e-07	-0.0424321	5.88265e-05
Acp1																			0.0705793	3.76113e-06
Acp2			-0.0280219	0.00589746
Acp6																					-0.0561197	0.00440555
Acrbp															-0.0314494	0.000134708			-0.0156085	0.00327799
Acsl3															0.088489	3.2737e-06			0.0354051	0.008129					0.103324	0.0024285													0.0556542	0.00324142
Acsl5													0.056684	1.89838e-05	0.0890667	0.000471458
Acss1															-0.0211691	0.00965176			-0.0257449	9.16846e-06	-0.0269693	0.000582059																	-0.0255409	0.000803863
Acss2			-0.063114	6.59449e-05	-0.0466913	0.00643547							-0.0405777	2.56143e-08	-0.0576519	3.92969e-05			-0.043575	0.000254415	-0.0510782	5.77918e-08	-0.0676952	0.00378578			-0.0944059	0.00754114											-0.0687417	2.47258e-10
Actb			0.108126	3.24716e-07	0.147955	1.6063e-13							0.10675	2.30044e-26					-0.0400136	0.00571656
Actg1			0.114147	3.00733e-06	0.154782	3.11157e-12							0.107169	2.85004e-20	-0.0478068	0.00159258			-0.0406808	7.76295e-07
Actl6a			0.0611627	8.71881e-05	0.113218	2.00648e-05							0.0798474	1.39937e-11	0.145244	2.18429e-09	0.148526	1.43145e-10	0.0666468	0.000187446	0.0853594	1.12937e-05	0.137562	0.00235011															0.0863287	8.17445e-05
Actn4															0.0155637	0.00973859
Actr10			0.0781774	0.000411198									0.0427457	0.000153718	0.0553406	0.00157787	-0.0113266	0.00927814	-0.023195	0.00825016
Actr1a																			0.0169689	0.000730512
Actr1b													0.0211286	0.00235228	0.0361384	0.0035587
Actr2															0.0957947	0.000360296	0.0668809	0.00852938	0.0690186	0.000234808	0.0745146	0.00283408																	0.0744299	0.00327678
Actr3	0.0774372	0.00111205			0.0793931	0.000121591							0.0736111	8.29877e-10			0.115071	1.08075e-06
Actr8																					-0.0528894	0.0030464							-0.100782	0.00473845
Acvr1b																			0.0275935	0.00466112
Acvr2a																					-0.021227	0.00221292																	-0.0160454	0.00920739
Acy1													0.0148502	0.000265765
Acy3	-0.0371166	1.94998e-06			-0.0506733	0.000106449							-0.0324747	1.27353e-08	-0.0244483	0.000194367	-0.0343149	0.000687356	-0.0251344	9.66893e-06							-0.0492836	0.00811609											-0.0205787	0.00185387
Acyp1	-0.287855	2.00069e-46	-0.179826	1.20891e-13	-0.243252	6.44439e-20							-0.242366	1.09155e-78	-0.283889	1.03574e-37	-0.281378	1.81775e-30	-0.203423	9.05261e-35	-0.165785	7.17895e-17	-0.188842	2.22219e-06	-0.152392	6.69359e-05	-0.226224	9.75714e-07	-0.245511	1.45958e-05									-0.212177	3.16017e-27
Acyp2													-0.0190937	0.00737177					-0.029183	1.78121e-05
Ada																			0.0360249	0.00193037
Adam22													-0.0206484	6.96509e-06			-0.0325855	0.000681021	-0.0190956	0.00060369																			-0.0218345	0.00212164
Adamts10													0.0277749	0.00131245			0.0511779	0.00873672	0.0519573	4.92167e-05
Adat1															0.0331353	0.000491599																							0.0364896	0.00308261
Adat2	0.0366475	0.000554166
Adck2																			-0.0300569	1.58517e-06	-0.0368032	8.11876e-05
Adck5															0.0263372	0.00514441					0.0340318	0.00669596
Adcy7															-0.0735363	0.000728427	-0.0680684	0.00350761			-0.0897214	1.58522e-05	-0.120787	0.00626806															-0.0832717	2.2955e-05
Adcy9			0.00368631	0.00315914
Add1													-0.0368624	0.00438118	-0.0772499	0.00017831			-0.0440723	0.00906156																			-0.0653833	0.00182109
Add3			-0.0317157	0.00780098									-0.0212573	0.000779169	-0.0638753	0.000351382			-0.0599885	0.000269036	-0.104953	9.54852e-09			-0.0982302	0.00314175			-0.139998	0.00438193									-0.106484	1.42097e-10
Adgra3																			0.000115679	0.00284044
Adgre5	-0.0823255	3.00885e-11	-0.0657715	0.000152476	-0.119802	1.49779e-08							-0.0898607	5.89235e-26	-0.0686558	4.97221e-10	-0.0654143	2.65702e-06	-0.059022	2.08885e-10							-0.147494	9.5597e-07	-0.0499882	0.00078612									-0.0551811	3.82507e-11
Adgrg1															-0.122296	1.2231e-07	-0.0747381	0.00452573	-0.0669679	0.000175082	-0.223098	2.03801e-16	-0.204825	0.000104525	-0.208091	0.000285857			-0.207365	0.000982667									-0.184619	1.38927e-12
Adgrg3																					-0.0655153	0.000834241
Adgrl2													-0.0314676	0.000172549					0.0282736	0.00207846
Adgrl4	0.273012	8.17064e-38	0.1797	3.1989e-11	0.212738	9.74063e-14							0.22161	9.16413e-59	0.20193	3.5362e-19	0.278022	1.32307e-26	0.229282	5.96397e-30	0.0746899	0.00302258			0.154742	0.00324251	0.238173	6.95666e-06											0.129857	1.36251e-07
Adi1	-0.0504013	0.0018244	-0.0609878	0.00146579									-0.0522352	4.12639e-09	-0.0595657	0.000767373			-0.0482751	0.000121182																			-0.0524621	0.00106453
Adipor1	-0.0803386	3.71771e-05			-0.0862425	0.00792947							-0.0814124	1.92386e-10	-0.123285	8.77204e-08	-0.133495	3.66665e-08	-0.0871338	1.42874e-07	-0.117348	2.18391e-08							-0.159918	0.00193826									-0.117035	2.25965e-09
Adk																			-0.0791086	1.20477e-05
Adnp																	0.0302268	0.00840864	0.0158515	0.00799072
Ado													0.0255559	0.00374521	0.0551052	0.000328701	0.0756068	7.28962e-05	0.0491092	0.00055329
Adora2a	-0.039574	0.000660481											-0.0402723	4.90733e-09	-0.0455055	1.64022e-05	-0.0632135	5.81261e-06	-0.0469288	1.92143e-07
Adpgk					0.0344269	0.00659939							0.0276729	8.88894e-06			0.0558451	0.000394963	0.0424651	0.000282899	0.0810854	4.90052e-08							0.0691029	0.00417112									0.0649476	2.8368e-06
Adprh	0.0128371	0.00139502
Adprhl2	0.0708024	2.69358e-05											0.0458018	1.21565e-06	0.0863139	5.70955e-07	0.0561875	5.2428e-05	0.076275	1.06359e-06	0.0904288	1.36204e-05	0.126634	0.00269822					0.116941	0.000588327									0.0835704	1.75062e-05
Adprm															-0.0412742	0.00357499
Adrb2	-0.0498054	4.46722e-05			-0.0621605	0.00712909							-0.0483673	1.30919e-09	-0.106622	1.26476e-08	-0.0589483	0.000165757	-0.042042	5.04456e-06							-0.120574	0.00485811											-0.0516957	4.97159e-06
Adrm1	0.11515	1.7679e-10	0.106595	3.11917e-09	0.115394	1.67017e-07							0.117322	1.13534e-28	0.0765852	6.20165e-07	0.137715	2.94842e-10	0.103187	4.41522e-10	0.139551	1.67441e-10	0.130017	0.00449173	0.158496	0.000546287													0.111502	1.19785e-07
Adsl			0.0369659	0.0006633									0.0421822	4.47679e-05	0.0919044	0.000161293	0.0775341	1.16793e-05			0.0904222	0.000205672																	0.0843924	0.000175692
Adss																					0.0383148	0.000149853																	0.0315698	0.00230623
Adssl1	-0.0475393	1.83442e-05			-0.076047	6.26176e-05							-0.0553084	1.47301e-11	-0.114215	4.52515e-08	-0.0607293	0.0076879	-0.0746397	3.02357e-06	-0.0700404	0.000527053																	-0.0895882	1.04945e-05
Aebp2													0.045338	1.37813e-05	0.0795704	9.00201e-06			0.0554223	0.000256643	0.0848998	1.63098e-05					0.131199	0.00110624											0.0890177	5.45054e-06
Aen	0.192251	2.55192e-33	0.10818	2.40125e-11	0.113882	1.41848e-11							0.154252	2.07389e-62	0.284733	3.54519e-48	0.321168	1.2775e-54	0.304735	3.3746e-84	0.33369	1.12696e-61	0.329949	7.83563e-17	0.327007	6.38205e-18	0.21023	6.68216e-06	0.42645	1.72598e-23									0.316917	3.04061e-60
Aes	-0.0891141	1.47269e-05											-0.0523543	2.60344e-05			-0.0988403	4.27115e-06	-0.114068	1.45998e-14
Afap1l1	0.0434918	0.00128428	0.07358	0.000839418									0.0432359	1.07741e-06
Aff1															-0.0386965	0.000369024																							-0.0294748	0.00315225
Afg3l2	0.0478371	0.00249943	0.0550249	0.00807074									0.0458371	8.95684e-08	0.081334	8.02461e-08	0.0580238	0.000199524	0.0483836	0.000172807	0.0553319	0.000179328																	0.0536669	8.33644e-05
Aftph																			0.0456732	0.0013116
Aga	-0.0535374	5.19262e-05	-0.0596678	0.00164559	-0.0656521	0.000718114							-0.0595326	2.09671e-12	-0.0304599	0.00667962			-0.0639676	1.81506e-07	-0.0420444	0.00388933
Agap2																	-0.00509224	0.000803245
Agap3	0.0363891	0.00277332											0.0313836	5.43514e-05	0.0500745	0.000144082	0.0540355	0.00112276
Agbl3	-0.0301548	4.43679e-05											-0.0257717	1.08681e-06					-0.0307629	7.21686e-05	-0.0554446	8.61966e-08																	-0.0412982	2.92659e-05
Agbl5													-0.014868	0.00591853
Agfg1	0.0531071	0.00124481	0.0895892	1.36281e-06	0.0600285	0.00460603							0.0652171	7.75553e-13	0.111139	1.21058e-11	0.0929089	7.75945e-10	0.0838196	8.81638e-13	0.089293	7.09116e-08	0.137606	8.53312e-05	0.0896743	0.000303785	0.165546	0.000141507											0.101765	1.88872e-10
Agfg2															0.059173	9.24437e-06			0.0311529	0.00685185
Aggf1													0.0326389	0.00453264	0.0821379	5.58258e-05	0.06919	0.00498755	0.0683257	1.83501e-05	0.0794915	0.000133954			0.103213	0.00870556													0.0736868	0.000424706
Ago1																			-0.0379025	6.03744e-05
Ago3																	0.0459374	0.00504569
Ago4															-0.0301606	0.000720881					-0.0336888	9.59102e-06	-0.0520731	0.000568657															-0.0272667	9.71926e-05
Agpat3																			0.0298221	0.00666168
Agpat4													-0.0259855	0.0052605
Agpat5	0.146961	2.93923e-16	0.0954484	4.70731e-08	0.138266	7.24288e-11							0.137875	2.58576e-39	0.224396	2.04056e-31	0.193573	3.91665e-24	0.22191	1.05396e-38	0.261109	1.64324e-33	0.219198	5.18301e-07	0.252414	1.42671e-08	0.138318	0.000312892	0.384092	3.45967e-13									0.237683	1.13665e-31
Agps													0.0152009	0.00216893
Agtpbp1															0.0423512	0.00179207			0.0260995	0.00706063	0.0359418	0.00237745
Agtrap	-0.0653568	3.66541e-05	-0.0789456	0.000806543	-0.0922593	7.28728e-05							-0.0805591	2.83413e-15	-0.173223	1.51597e-20	-0.117977	1.00391e-07	-0.0801263	5.46211e-08	-0.181515	2.41973e-24	-0.124188	0.00071415	-0.134684	1.94083e-05			-0.255517	8.20894e-08									-0.160647	2.82827e-20
Ahctf1	0.0545652	0.000696735	0.0908958	1.87349e-05									0.069788	6.96232e-11	0.129205	3.24997e-12	0.105308	2.46926e-05	0.145949	8.43656e-20	0.139213	1.2139e-10	0.154266	8.02738e-05															0.107677	4.14743e-07
Ahcy																			-0.0347188	7.21686e-05	-0.0321295	0.00562656
Ahcyl1																	0.0547562	0.000604568	0.0494176	0.00249491
Ahcyl2															-0.0432685	0.000891474
Ahdc1													0.0243319	0.00220481					0.0436916	3.60118e-05
Ahi1	-0.0458315	0.00332704
Ahsa1	0.0862275	0.000340724			0.103713	0.000578024							0.0769177	1.97679e-08	0.104044	2.11753e-06	0.0834697	0.000248789	0.0674991	0.000214745	0.102618	1.96044e-06	0.130495	0.000659384															0.108104	3.31245e-07
Ahsa2	0.0578466	0.000322568	0.044367	0.00749787									0.0474588	3.91377e-09							0.0746757	0.000326863																	0.0599142	0.00518654
Aig1			-0.0735364	0.00645048									-0.0623311	3.63229e-06			-0.079823	0.000936075
Aim2													-0.0216323	0.00242559	-0.0343188	0.00377926																							-0.0478008	0.00594856
Aimp1	0.0667754	0.00791888											0.0398031	8.92955e-05							0.0766621	0.00106266																	0.0662046	0.00369926
Aimp2	0.145251	2.34465e-17	0.123475	4.27974e-11	0.104172	1.25878e-07							0.133718	2.09244e-40	0.244283	2.17696e-42	0.158687	3.93911e-13	0.164025	2.20815e-32	0.226565	3.13348e-30	0.232898	9.7934e-10	0.215664	1.42714e-07	0.217697	2.63814e-06	0.289036	1.32871e-08									0.239345	3.15218e-35
Aip																			-0.110669	1.02495e-10	-0.0873209	0.000126095																	-0.0636978	0.00594927
Airn													-0.0233773	0.00541394
Ak1	-0.0429212	0.000176425											-0.0438515	5.95962e-09	-0.0328043	0.00108269
Ak2	0.104595	2.42506e-06											0.0829231	7.54167e-10	0.18028	6.15915e-14	0.15093	9.353e-10	0.0968886	2.75143e-08	0.148219	1.12202e-12	0.185344	2.30854e-06	0.0956086	0.000238968													0.150335	1.6457e-13
Ak3	-0.042234	0.00257059											-0.0382539	1.55925e-05					-0.0613918	1.13905e-06
Ak4															0.0508454	3.06093e-06			0.0475476	7.39341e-12	0.0363673	0.001256																	0.0433506	2.85624e-05
Ak6	0.0474984	0.000669856			0.0424635	0.00571232							0.0433568	1.8497e-08	0.108501	1.57194e-09	0.0762072	0.000261408	0.0951537	1.25603e-11	0.095945	6.9798e-06							0.178906	0.000179261									0.115522	2.52765e-09
Akap1															0.0285905	0.00694636	0.0475756	1.45492e-05	0.0360564	7.54522e-06	0.0450252	0.000152817							0.0271736	0.00671838									0.0361049	0.00156987
Akap10															-0.0414007	0.000771115
Akap11													0.0224219	0.00325305			0.053285	0.00912406
Akap13													-0.0482992	0.00684787	-0.11504	8.22318e-05					-0.211675	5.96391e-17	-0.174867	0.000430945					-0.268059	0.00254703									-0.160385	1.10184e-10
Akap7					-0.0567263	0.00813733							-0.0432211	1.27403e-06	-0.0403851	0.00578812					-0.0465076	0.000134565	-0.0692493	0.00467406															-0.0380911	0.000162243
Akap8	0.0781963	1.98989e-08			0.0650004	1.29772e-05							0.0656831	8.2781e-15	0.129404	7.74927e-12	0.116774	6.74045e-06	0.116014	9.2956e-12	0.139569	2.92166e-10	0.196317	5.01855e-06															0.123955	6.40598e-09
Akap8l	0.05436	0.00021908											0.0426815	0.000133046
Akap9	0.0893389	0.000308232											0.0563133	2.8695e-05	0.0939007	6.43827e-07	0.0818978	0.00162862	0.140958	2.46689e-14	0.0708425	4.9756e-05	0.120431	0.00429822															0.0535577	0.00175832
Akip1													-0.0210879	0.00608886					-0.0454205	0.0049699
Akirin1			0.09407	1.31837e-08	0.0635956	0.00670308							0.0574797	4.80406e-10			0.0705475	0.000206635			0.107235	2.74504e-09			0.110386	0.00256951			0.127789	0.00445589									0.0807211	9.52803e-06
Akr1a1															-0.103534	4.38416e-06	-0.0915096	0.00138128	-0.124397	1.94852e-13	-0.102533	3.55772e-06							-0.152203	0.00264298									-0.0917299	1.92232e-05
Akr1b10	-0.0566984	0.000765158											-0.0592814	1.13118e-08	-0.121759	4.79715e-13	-0.13257	6.87365e-11	-0.069375	6.98558e-07	-0.145288	6.9663e-19	-0.104135	0.0038644	-0.0808239	0.00445342			-0.232751	1.83895e-09									-0.124814	3.23549e-15
Akr1c12																			-0.0217256	0.00103439	-0.0256397	0.00545836																	-0.0242636	0.00738871
Akr1c13	-0.0645604	3.1141e-05											-0.0484292	5.71212e-07	-0.0922594	1.39581e-06			-0.0779056	1.38665e-06	-0.120523	7.69747e-10	-0.135406	0.00106407															-0.0945271	1.21364e-06
Akr1e1	-0.0747036	1.61885e-06	-0.0739119	0.000510191									-0.059859	1.40264e-09	-0.0901577	1.5381e-06	-0.0967652	2.27289e-06	-0.0763323	1.68659e-08	-0.0696489	0.000411352																	-0.076633	3.14251e-05
Akr7a5																			-0.0493696	0.00307143
Akt1	0.126302	7.79028e-09	0.112076	2.0088e-07	0.104071	0.000110882							0.120672	3.01106e-23	0.162064	1.16192e-11	0.127049	1.23529e-07	0.119205	4.60856e-12	0.130973	1.21491e-08	0.176217	9.46998e-06															0.138198	1.57897e-10
Akt2	0.102319	8.80397e-11	0.0674149	0.000679235									0.0765761	1.03239e-14			0.0753353	0.000184114	0.0983145	1.6113e-12	0.0745928	7.76428e-07							0.13726	0.00305598									0.0698318	7.05383e-06
Aktip															-0.0393363	0.00993993	0.00978103	0.008748			-0.0328915	0.00195198
Alad																	0.0543535	0.00379589			0.0791684	0.00110595
Alas1	-0.0447634	0.000753288											-0.0267107	0.00254797
Alcam	-0.0497719	0.00339613											-0.0495819	4.08299e-07	-0.123338	3.35424e-10					-0.092983	1.53535e-06	-0.149501	1.57331e-05															-0.104497	3.20882e-09
Aldh18a1	0.0760901	1.91987e-07											0.0510986	8.38299e-10	0.132304	3.6231e-18	0.102293	4.15693e-08	0.0839321	2.84112e-11	0.0931781	8.05723e-09	0.110906	0.0023787			0.113312	0.0061936	0.137527	0.00127165									0.115173	8.01535e-13
Aldh1l1													-0.0194897	0.00214389
Aldh2	-0.140989	3.86996e-16	-0.101299	1.97194e-06	-0.116617	1.30484e-06							-0.119859	3.03232e-28	-0.162117	9.2908e-19	-0.124968	3.77379e-10	-0.108905	6.79357e-15	-0.0564527	0.00847124					-0.140867	0.00226939											-0.0860987	1.17178e-05
Aldh6a1	-0.0207364	0.0088152													-0.044267	5.80466e-05			-0.0239228	0.00478222
Aldh7a1																			-0.045138	0.0019119
Aldh9a1															-0.0385968	0.00262665
Aldoa													0.0211391	0.0043398	-0.0860252	0.00675858			-0.096482	0.000182473
Aldoc													-0.044549	5.70325e-07	-0.048785	0.000206455	-0.0604583	0.000616961			-0.036677	0.000642061	-0.103113	0.000115325			-0.0955843	0.00543099											-0.0514185	1.18596e-06
Alg10b															-0.0285133	0.00134248
Alg13																			0.0309923	0.000107905
Alg14																	-0.0473952	0.00103321
Alg2	0.0654028	3.13828e-06			0.0572709	0.00661347							0.0620929	1.90959e-11	0.0775819	9.44226e-08	0.0852695	1.31238e-05	0.0661861	1.05501e-08	0.040237	0.00804248																	0.0518875	0.000511619
Alg3	0.0564064	1.04511e-07	0.0506557	2.90161e-05	0.0613979	2.36946e-06							0.059387	1.09053e-21	0.0612268	7.73678e-06	0.0505378	0.00808433	0.0624015	8.46774e-07	0.0515888	2.05541e-07							0.0763122	0.00113193									0.0533222	1.32491e-07
Alg5	0.0256486	0.00102377											0.029607	0.000435676	0.096223	1.67793e-06	0.086952	2.17805e-07	0.0556398	0.000747976	0.113176	2.24028e-07	0.129157	0.00264017															0.110502	1.37791e-07
Alg6													-0.016423	0.00343642
Alg8													0.0207497	0.000446266	0.056296	4.97991e-06							0.0783371	0.00534704
Alkbh1	0.115522	2.23885e-07	0.134877	3.69582e-09	0.155641	9.07609e-10							0.142772	7.17883e-30	0.205342	1.21369e-17	0.14593	1.53293e-09	0.138508	9.64369e-17	0.161537	1.55589e-13	0.175487	8.28709e-05			0.150257	0.00617001	0.191457	0.00109084									0.153058	1.92023e-12
Alkbh2															0.0397771	0.00444662					0.066978	6.64842e-08	0.116042	0.000940634															0.052148	3.6341e-05
Alkbh3			-0.0439129	0.00991882
Alkbh5															0.0598847	0.00424931					0.0596038	0.00477222					0.126376	0.0031138											0.0597842	0.00411477
Alkbh6															-0.0386726	0.000180157
Alkbh7																			-0.049286	0.00027681
Alox5ap	-0.124818	2.66653e-06			-0.134965	1.49485e-05							-0.109083	1.32839e-13	-0.211353	2.13359e-17	-0.140928	5.503e-08	-0.155324	4.21913e-15	-0.167934	2.17626e-11	-0.146892	0.00168238					-0.3008	0.00015973									-0.163422	2.32704e-12
Als2																			0.0240304	0.00254241
Alyref	0.20591	5.52824e-20	0.149136	6.78299e-11	0.196475	6.06033e-14							0.193761	2.53553e-47	0.193605	9.12389e-17	0.247141	2.22131e-21	0.141738	1.45693e-16	0.181098	6.12992e-17	0.237593	6.03772e-10			0.175662	4.11059e-05	0.225065	0.000156974									0.193807	2.29558e-20
Amacr													-0.0179353	0.00273947
Amd1	0.0783712	3.97043e-07											0.0609249	2.49399e-12	0.132238	2.82603e-12	0.154235	1.0174e-16	0.107324	2.45634e-13	0.15898	2.83076e-14			0.185309	1.51472e-05	0.117067	0.00704345	0.23633	2.34253e-07									0.169038	5.48164e-18
Amdhd2	-0.0537586	5.58957e-07	-0.043061	0.000569491									-0.0484253	3.0873e-13	-0.0697506	1.70875e-05			-0.0579129	2.17755e-05	-0.0520617	0.00399601							-0.0713033	0.000872981									-0.0457724	0.0023715
Amer1																	0.0472588	0.000507568
Amfr	0.055838	6.2532e-05											0.0512901	9.27555e-08			0.0451374	5.77022e-08			0.0722325	0.000219904																	0.0550917	0.0063635
Ammecr1l													0.0235431	0.0092714
Amn1	-0.0508004	0.00193214											-0.0429199	4.23473e-05							-0.061226	0.000150614																	-0.0526654	0.00252587
Ampd2	0.0601627	0.00345116											0.0356573	0.0057778	0.0765967	5.73635e-05			0.0555812	0.000183103	0.0659838	0.000329778							0.110471	0.0061429									0.0634357	0.000389532
Ampd3	-0.0100603	0.00298622
Amz2	-0.0414241	0.0086445											-0.0412261	7.31835e-05	-0.0755068	0.00027024	-0.0629181	0.00983135	-0.0460888	0.00383953	-0.093918	3.36584e-08																	-0.0836087	3.90352e-06
Anapc13	-0.0731694	0.001649											-0.0539512	0.000117496			-0.0596234	0.0020586	-0.0665591	2.82298e-05	-0.0841308	0.000107097																	-0.0664812	0.00245883
Anapc15													0.0192445	0.00823111
Anapc5													0.0426838	0.00691418			0.104355	0.000130711
Anapc7																					-0.091534	7.4019e-06																	-0.0694061	0.000782879
Angel2	0.0173231	0.00653253											0.017905	5.02343e-05
Angpt1	-0.380106	8.31168e-55	-0.214026	1.03354e-17	-0.285461	4.41108e-22							-0.30581	7.65014e-95	-0.378388	1.97999e-49	-0.30373	1.63159e-30	-0.264797	2.55946e-36	-0.379106	4.56222e-43	-0.373435	5.28029e-13	-0.337237	3.20605e-10	-0.355025	1.27611e-13	-0.368322	7.55949e-07									-0.384161	7.78369e-46
Angptl4															0.0522143	6.94894e-05	0.0549007	6.39265e-05	0.0340511	0.00129462	0.0541557	0.000715749																	0.0522959	0.000367029
Ank																	-0.0367105	0.00254048
Ankhd1	0.0797237	2.52577e-05											0.0564843	2.97596e-06	0.0782773	0.000916045	0.0887405	0.000567743	0.108112	1.37443e-11
Ankib1					0.0612511	0.000583676							0.0318871	0.000286103			0.052634	0.00736276											0.0812047	0.0049084
Ankle2	0.0369424	0.00453318																	0.049924	0.000224052
Ankmy2			-0.0163109	0.00429047									-0.0248197	0.00771245	-0.0460363	0.00656453																							-0.046944	0.00178825
Ankrd10	0.0651562	0.00621255											0.0553435	3.31602e-05	0.104073	0.000169186			0.0597473	0.000950623	0.129726	6.19945e-09			0.216875	3.89119e-05			0.166395	0.00748326									0.0909443	1.51571e-06
Ankrd11	0.21221	3.36236e-23	0.111219	4.04925e-05	0.174147	4.5086e-10							0.166375	7.01034e-37	0.194844	6.30331e-17	0.15159	2.83988e-13	0.117299	5.78933e-11							0.227543	3.00498e-06											0.121702	1.95753e-08
Ankrd12															-0.122684	1.50968e-06	-0.0823424	0.00692432	-0.0959189	8.20575e-07
Ankrd13a													-0.0559951	0.000632003	-0.135063	3.98465e-07	-0.140787	3.96841e-08	-0.0933235	4.85439e-07	-0.121158	1.25069e-06	-0.136831	0.00352579	-0.227825	9.79737e-05	-0.166331	0.00176335											-0.161867	1.55594e-12
Ankrd13b																			0.0223172	0.00122086	0.0357196	0.000189197
Ankrd13c													0.0242455	0.00110273					0.0336606	0.00260807
Ankrd13d					-0.0258128	0.00593071							-0.0216349	4.44529e-05	-0.0295529	0.000209236	-0.0183932	0.00807197
Ankrd17	0.107314	1.66633e-06	0.118305	1.15945e-07	0.0993519	0.00150772							0.107553	8.95312e-17	0.097309	3.22878e-07	0.120488	2.53611e-05	0.110834	3.33355e-09	0.120731	6.60218e-09	0.128152	0.00652324			0.125667	0.00225201											0.0949632	6.2859e-07
Ankrd24													-0.0235725	0.00974735
Ankrd26																					0.0617541	0.000573114
Ankrd33b					-0.0498806	0.00657472							-0.0345683	3.93387e-06	-0.0340865	0.00185202					-0.0148937	0.00442219																	-0.0250856	0.00024993
Ankrd39																			0.0414719	0.000270849
Ankrd40	0.048139	0.00126973	0.0536846	0.00121328									0.0499312	2.07509e-09					0.0656778	4.06117e-11
Ankrd44	-0.0380549	0.000879302	-0.0472171	0.0065194	-0.0564776	0.00345004							-0.0494408	6.69366e-11	-0.0939421	2.78055e-08	-0.0901535	1.65007e-07	-0.0534727	3.7678e-05	-0.0907074	7.76428e-07																	-0.0771779	7.91577e-06
Ankrd46																			-0.045428	0.000502935
Ankrd49	0.0549136	0.00114421											0.0385488	5.22922e-05	0.0642467	0.000137207
Ankrd52																			0.0319069	0.00148888																			0.0283827	0.00899647
Ankrd9			0.0302753	0.00599489									0.0161413	0.00987955			0.0360846	0.00169703			0.048931	1.1337e-05			0.0809615	0.000336433													0.0446962	2.95412e-06
Anks1	-0.0817079	1.56426e-07			-0.105983	3.43145e-06							-0.077774	2.32423e-14	-0.0739213	0.000359303
Anks3													0.0228436	0.00688089
Ankzf1																			-0.0322378	0.00216519	-0.0642948	5.11904e-07																	-0.0505376	5.0804e-05
Anln																			0.034353	0.00653825	-0.0410987	0.00200055
Anp32a	-0.111045	0.000104958											-0.0771141	1.90389e-07	-0.101475	2.69711e-06			-0.0586341	0.000134566	-0.0701657	0.00093202			-0.107616	0.0019677
Anp32b	0.190024	1.31039e-30	0.187145	4.69792e-21	0.248068	3.44381e-29							0.222002	9.07597e-90	0.30304	6.71987e-57	0.334617	5.87674e-61	0.23716	1.4305e-63	0.222436	3.84684e-38	0.29272	1.26136e-18	0.133332	1.35823e-06	0.26873	7.86049e-12	0.238225	1.43354e-10									0.249292	9.17977e-48
Anp32e	0.136472	5.28846e-11	0.107025	1.78808e-07	0.113365	3.4863e-06							0.129192	4.25019e-27	0.209895	5.94381e-18	0.189725	5.04714e-14	0.109319	4.21203e-11	0.0752283	0.000239985	0.119491	0.00892331			0.240223	2.91019e-08											0.125439	4.90247e-08
Antxr2	-0.0289138	2.32045e-06											-0.0236077	8.28172e-07	-0.0521544	1.73125e-07	-0.0410886	7.68588e-05	-0.0236705	0.0008775	-0.0445738	5.41646e-06							-0.0482766	0.00538392									-0.0495432	3.21829e-08
Anxa1	-0.118732	1.90212e-10	-0.10252	6.67429e-06	-0.108983	6.26176e-05							-0.113538	2.64396e-21	-0.210784	1.73848e-16	-0.123849	5.20612e-06	-0.131455	3.93819e-10	-0.160986	4.41573e-11	-0.154617	0.00163867					-0.209553	0.00045723									-0.147143	3.69142e-10
Anxa11	-0.0563202	0.00956224											-0.0330972	0.00650363			-0.0760802	0.00199968	-0.0532487	0.00335947																			-0.061617	0.00909804
Anxa2	-0.0346562	0.00236466											-0.0344711	1.39959e-06	-0.105279	7.74314e-07	-0.0889127	1.73018e-06	-0.0674626	9.88079e-05	-0.10024	9.62343e-06																	-0.0984086	4.74355e-06
Anxa4	-0.0342825	0.0069987											-0.0389241	0.000129563	-0.106294	6.29072e-07			-0.0790764	2.62552e-07	-0.0542046	0.00539507																	-0.0707892	0.000516879
Anxa5	-0.192045	1.87441e-15	-0.117355	5.73599e-06	-0.144383	8.35628e-07							-0.161876	2.97677e-30	-0.262156	2.35237e-26	-0.18832	2.68162e-12	-0.131948	1.14136e-12	-0.115325	8.02182e-07					-0.151722	0.00465127	-0.259117	0.000433822									-0.146846	2.58606e-10
Anxa6															-0.0580121	0.006058					-0.0414509	0.00436328																	-0.0477666	0.00603457
Anxa7	0.213231	4.44514e-26	0.108655	8.68342e-07	0.0923862	7.1308e-05							0.140862	1.3679e-32	0.131274	3.35017e-09	0.114671	1.50954e-08	0.0726967	2.01888e-05	0.0996303	7.13377e-06	0.128053	0.00735601			0.178573	0.000562241											0.114633	8.21206e-08
Ap1ar															0.0653832	2.87368e-06			0.0562783	0.00017																			0.0505968	0.0080213
Ap1b1																	-0.0189303	0.00508225
Ap1g1	0.0669502	1.86357e-08			0.0591311	0.000456295							0.0556385	2.27882e-13	0.0550244	0.000376464			0.0517857	3.39922e-07	0.0453226	0.00773654					0.114166	0.00632022											0.0592656	0.000163203
Ap1g2					-0.0320037	0.0090987
Ap1s2																			-0.0185268	0.00623501	-0.0523373	0.000196403	-0.0853744	0.00234289
Ap2s1					0.0670574	0.00639751							0.0575206	2.16715e-07	0.0413982	0.00439775	0.128481	5.92086e-07	0.057209	3.61783e-05																			0.0602711	0.00988053
Ap3d1															0.0417442	0.000123093			0.0128003	0.000833737
Ap3m1	0.0357697	0.00085088											0.0319431	1.8762e-06	0.0436963	0.000407622	0.0392824	0.000131098	0.0427443	0.001631	0.0314224	0.00901772																	0.0358958	0.0083524
Ap3m2																	-0.0253732	2.85e-05
Ap3s1	0.0640717	5.36407e-06	0.0546884	0.000351947									0.0588143	1.44667e-12
Ap3s2													0.00858483	0.00619591
Ap4b1															-0.0335816	0.00179386			-0.0228008	0.00196705																			-0.0348677	0.000392106
Ap4m1													-0.0117036	0.00588478
Ap5m1													-0.0225383	0.00184806	-0.0471904	0.000612909
Ap5s1													-0.016343	0.00148223
Ap5z1													-0.0130732	0.00334575					-0.0232293	0.00089791	-0.0230569	0.00623311																	-0.0238936	0.00627276
Apaf1															-0.0278431	0.000859244
Apba3													0.0194569	0.00116596
Apbb1	-0.0304712	0.000340069	-0.033048	0.00504633									-0.0328803	1.15638e-09			-0.0341609	1.51311e-05
Apbb1ip																			0.0624543	0.000767516
Apbb2															-0.0240121	0.00729047			-0.0285253	9.14008e-08	-0.0297619	0.000677292																	-0.0287823	0.000244494
Apc																			0.0433056	0.00822821
Apex1	0.202518	3.94972e-22	0.148009	1.86765e-11	0.226433	6.40653e-21							0.207762	6.03824e-60	0.354675	1.53785e-54	0.301865	4.55545e-36	0.260146	1.00435e-47	0.363423	7.18571e-70	0.290628	1.21095e-17	0.361608	5.30214e-24	0.245655	2.45797e-09	0.427803	2.14304e-18									0.334027	1.37466e-65
Aph1c													-0.0309521	8.02282e-06	-0.039825	0.000138794	-0.0423736	0.000248151	-0.0223771	0.00139445	-0.0378124	9.73555e-08							-0.0486585	0.00151296									-0.0413825	3.34511e-07
Api5	0.0934314	3.1122e-06	0.0869477	1.82655e-05	0.0666421	0.000781908							0.0836192	2.77124e-14	0.116919	1.25864e-10	0.0847444	0.000111801	0.144041	7.42644e-22	0.127029	5.55665e-09			0.167025	4.77346e-05	0.112537	0.00181395											0.12966	2.59951e-11
Apip																			-0.0586144	0.000232274
Aplp2	-0.0679135	0.00941897			-0.133358	2.2646e-05							-0.0863862	2.53218e-09	-0.133627	2.137e-08	-0.173354	1.72646e-11	-0.100209	1.4906e-09	-0.0495093	0.00741034																	-0.0731494	5.88098e-05
Apobec3	0.289969	2.42454e-40	0.222005	4.29655e-20	0.240286	2.41163e-18							0.248817	1.48695e-72	0.353502	2.74264e-46	0.400874	9.67143e-49	0.374941	8.46747e-86	0.25661	3.73736e-27	0.287333	6.51455e-13	0.348095	2.55748e-13	0.336338	9.01001e-12	0.257586	2.78927e-08									0.294426	3.7326e-38
Apobr															-0.0559811	6.12578e-05					-0.0599367	7.91648e-06																	-0.0507196	7.88109e-05
Apoe	-0.11497	6.33564e-05	-0.161818	3.64788e-07	-0.149814	3.96638e-06							-0.155248	5.8657e-20	-0.216971	1.26217e-11	-0.228711	2.53859e-10	-0.343745	6.28491e-21	-0.0901607	0.000146695																	-0.157484	3.6483e-06
Apoo			0.0435751	0.00717387									0.0284123	0.000181869
Apopt1																	0.0677752	0.00183808			0.0574573	0.00803528
App					0.0566996	0.00658763							0.0410972	3.80493e-06	0.0398165	0.00316464
Appbp2																			0.0399363	0.00325954
Appl1													0.0333521	0.00151513	0.0752025	0.000832062
Appl2													-0.0259182	0.000754262	-0.0359769	0.00320535
Aprt	0.200495	9.2291e-29	0.186657	2.884e-17	0.205289	6.35959e-16							0.209911	8.80669e-69	0.315761	3.29263e-52	0.240454	4.15148e-24	0.235841	8.29689e-37	0.290951	4.77643e-36	0.304285	7.37429e-17	0.188497	2.03777e-06	0.215965	1.09061e-07	0.329833	1.41947e-07									0.268589	1.16398e-37
Aqp1																	-0.040876	4.7596e-05	-0.0460527	9.44429e-08
Aqp11	-0.0181082	0.00823745											-0.020335	2.84884e-07					-0.0168889	0.00607416
Aqr													0.0319285	0.000239669	0.0675887	0.00135846	0.101644	4.90056e-07	0.090808	8.19439e-10	0.0599388	0.00464656			0.086584	0.00477478													0.0611521	0.00510087
Araf													0.0049192	0.00185884
Arap1													-0.0388444	3.97144e-05	-0.0770196	9.33907e-06	-0.0510084	0.00539466					-0.0985711	0.00985614															-0.052921	0.00271379
Arap3																			-0.0267135	0.000254415
Arcn1	0.177406	5.07419e-23	0.128337	2.6062e-10	0.0969768	9.32535e-05							0.13739	1.9751e-36	0.130613	7.38378e-09	0.147353	1.10313e-11	0.100973	1.79142e-10																			0.0833406	0.000368666
Arel1													0.0102124	0.00489004
Arf1	0.170829	4.09385e-15	0.0727727	0.000103057	0.122513	1.25797e-06							0.122656	7.12797e-27	0.111608	3.20147e-10	0.16985	3.83594e-15	0.049643	0.00438924	0.112393	2.11516e-09							0.111653	0.00344642									0.108184	1.8747e-10
Arf2	0.0811726	1.42023e-11	0.0702381	5.47097e-07	0.0866174	5.25417e-06							0.0790584	3.13125e-23	0.0552775	0.000107164	0.0593239	0.000126815	0.0424314	0.000866451							0.102306	0.00612295
Arf3	0.0688131	6.39157e-05			0.117767	2.66116e-07							0.0782668	8.68913e-14	0.0929308	1.68914e-06	0.0990041	1.03209e-05	0.0765759	1.63709e-07	0.0413166	0.00768864					0.154609	0.00296686											0.0786619	5.89369e-06
Arf4	0.1655	4.76671e-14											0.0828783	4.71497e-13	0.074734	0.00387521	0.110443	5.10527e-06																					0.0718837	0.00565923
Arf5	0.125544	4.80088e-11	0.125696	3.38205e-10	0.123063	4.71828e-07							0.126022	5.8157e-30	0.113502	4.41042e-09	0.106889	2.51582e-06									0.141829	0.00319189
Arfgap1													0.0300954	0.00264386			0.040415	2.58447e-05	0.036802	0.00612012
Arfgap2	0.0319922	0.0008915											0.035349	0.000766608
Arfgap3	0.069872	8.28984e-15			0.0728847	9.70743e-08							0.0588546	1.25407e-22	0.0464065	0.000569688	0.0665575	3.00734e-07	0.0366753	2.52227e-05
Arfgef1	0.113222	1.08669e-10											0.0776319	1.6568e-11	0.0851418	0.000414177	0.0889308	1.64954e-05	0.0952034	7.20733e-09	0.0567688	0.00111477																	0.063825	0.00244163
Arfip2	0.0375108	0.00206411											0.0275942	0.00238261	0.0408783	0.00701778	0.0337595	0.000658166
Arfrp1	0.0568231	2.8131e-05											0.0316152	0.00288772					0.0604313	5.60814e-06	0.0832404	0.000257702
Arglu1	0.159276	1.07994e-15			0.0932109	0.00163651							0.109918	1.18097e-19	0.168389	3.56427e-17	0.182596	9.01204e-14	0.231368	1.05341e-42	0.168628	1.19201e-14	0.152411	0.000719986	0.143651	0.00481734	0.152787	0.00201243	0.255622	1.24661e-06									0.164847	6.57646e-17
Arhgap15			-0.0775784	0.00167862	-0.0999549	8.11228e-05							-0.0581483	6.65149e-07	-0.154504	6.05437e-10	-0.0713481	0.00364232	-0.101674	7.71325e-09	-0.155243	1.50888e-10					-0.16709	0.00235895	-0.189629	0.00299563									-0.149834	6.52607e-12
Arhgap17	-0.0891398	3.42896e-05											-0.0773737	1.33771e-09	-0.167834	4.18448e-12	-0.108692	3.46109e-05	-0.155028	6.72157e-21	-0.15481	3.3641e-13	-0.152736	0.000252634	-0.173377	2.06181e-05													-0.135549	1.2258e-10
Arhgap18													-0.0431133	7.65209e-06	-0.0949605	2.1206e-05	-0.0928986	3.55244e-05	-0.0801677	2.64866e-07	-0.159487	5.84595e-14	-0.178676	4.23904e-06					-0.206906	0.000129701									-0.129755	3.68756e-11
Arhgap25																			0.0535569	4.12338e-06
Arhgap26																			0.0152687	0.000181006
Arhgap29																			0.0230881	0.000451343
Arhgap30																					-0.0842533	0.00161719
Arhgap31	-0.0628935	0.00211949											-0.0536131	2.03382e-05	-0.063537	0.000236228	-0.0722159	0.000525474	-0.0389685	0.000163636	-0.0304778	0.00150027	-0.0489336	0.00790142					-0.0713454	0.00684379									-0.0439906	0.000185133
Arhgap32															-0.0858233	6.32781e-06	-0.0656463	0.000923993			-0.0757332	1.11596e-05			-0.100202	0.0013012													-0.0683057	2.93246e-05
Arhgap39																	0.0326103	0.00666053	0.0340989	6.21489e-06
Arhgap45	-0.11082	6.86268e-08	-0.0967991	0.000340323	-0.153021	3.34598e-09							-0.123896	3.66945e-23	-0.191302	3.64104e-17	-0.145607	3.25963e-09	-0.142162	7.71183e-17	-0.206909	3.66882e-20	-0.24116	3.19994e-08	-0.131216	0.00512456			-0.21366	0.000388989									-0.182566	1.35165e-18
Arhgap5													0.0172457	0.000512257					0.0438941	0.00533108
Arhgap6	0.055953	6.76967e-05	0.0500525	0.00307044	0.077586	2.77629e-06							0.0555618	1.3631e-12			0.0555932	0.00017668
Arhgdia	0.0890521	0.000429026	0.126598	3.90833e-09	0.104664	0.000858347							0.106093	6.07139e-16	0.11694	4.85569e-08	0.0849021	0.00146325	0.0717851	4.24462e-05																			0.0823374	0.000131822
Arhgdib	-0.12196	3.97345e-06	-0.10255	0.000483379	-0.127818	2.68755e-05							-0.110598	1.71023e-14	-0.26438	8.72166e-40	-0.155766	7.01075e-10	-0.226352	2.2267e-41	-0.190134	7.84406e-24	-0.234333	6.41324e-13	-0.13884	0.0006532	-0.147593	0.004223	-0.205282	0.000152302									-0.181363	7.29829e-21
Arhgef1													-0.0442913	0.000269727	-0.0960797	5.44102e-05			-0.0851386	3.15015e-07	-0.0980811	4.11919e-05	-0.133908	0.0022291															-0.105141	9.69264e-07
Arhgef18	-0.0458874	3.44e-05	-0.0580892	0.000114052	-0.0562913	0.00043355							-0.055658	6.62915e-16	-0.104124	3.50181e-11	-0.0571833	0.00202224	-0.0828803	1.93671e-14	-0.129004	1.488e-16	-0.141976	1.16028e-05	-0.0871687	0.00248333	-0.133964	0.00159521	-0.129002	0.00118907									-0.121839	1.38574e-16
Arhgef28	-0.0194495	0.0027738	-0.0322711	0.000185683	-0.035423	0.00160363							-0.027387	5.75972e-12
Arhgef3	-0.0331454	0.0016145											-0.0360857	8.7344e-07	-0.0636489	4.90875e-07	-0.0573835	8.30156e-08	-0.0271492	0.00211635	-0.0771628	1.01282e-08	-0.104216	7.98163e-06			-0.0976308	0.00498123											-0.0686535	3.49398e-08
Arhgef39																					-0.0653383	8.77357e-07							-0.156751	0.00398091									-0.0480423	2.8308e-05
Arhgef40	0.0319681	0.00795451											0.0368532	1.81536e-06			0.0637426	7.13681e-05	0.0466002	5.18268e-05	0.0680393	1.13957e-07	0.0921802	0.00667272
Arhgef6															-0.090719	0.000104928					-0.0924608	9.04968e-05																	-0.100859	7.65389e-06
Arhgef7					0.0383456	0.00279603
Arhgef9													-0.0185066	1.02933e-06
Arid1a	-0.0655608	0.00874468																			-0.0749147	0.00406436
Arid1b	-0.134411	1.52509e-12	-0.109467	6.94966e-06	-0.114315	1.05822e-05							-0.123019	2.46958e-25	-0.16887	5.66274e-14	-0.135868	9.89973e-08	-0.116782	4.89874e-11	-0.102197	5.17641e-07							-0.185057	0.00141691									-0.116012	1.24462e-08
Arid2															-0.0721071	5.18502e-05
Arid3b															-0.0433911	1.52067e-05
Arid4a	-0.0608308	0.000885517	-0.0726061	0.00956519									-0.0563541	3.14537e-05	-0.107127	3.57487e-05					-0.0958575	0.000107873							-0.197435	0.00496781									-0.0821924	0.000896071
Arid4b			0.0887015	0.00207281	0.0884612	0.000685949							0.0650119	1.95375e-07
Arid5b			0.0589047	1.69754e-11									-0.00672642	2.22426e-10	-0.148068	2.51355e-20	-0.047219	1.07089e-06	-0.0369283	0.00281012	-0.102279	1.86768e-10	-0.120343	0.0008493			-0.182676	6.19544e-07	-0.105688	0.00904083									-0.121706	1.6597e-16
Arih1	0.0649755	0.00130568	0.0561202	0.00903099									0.0579863	9.27456e-08	0.054635	0.00708416			0.0571543	0.000407671
Arih2	0.0410693	4.52154e-05	0.0492156	0.000191618									0.0314915	3.08919e-05							0.056163	2.90248e-05
Arl1	0.142487	1.00192e-11	0.070645	0.00601519	0.0899294	0.000307958							0.102329	2.7754e-18	0.160692	2.74942e-16	0.168061	3.64754e-14	0.138374	7.26666e-22	0.198102	1.91173e-22	0.214465	6.0447e-08	0.135895	0.00152668	0.15104	0.00185908	0.251834	4.49171e-08									0.185776	6.61534e-21
Arl10																			0.0372646	6.90028e-06					0.0599095	0.00329395
Arl11															-0.0737337	1.37928e-10	-0.0378148	0.00013957	-0.0746527	3.59275e-19	-0.154353	1.99098e-22	-0.150507	1.20622e-06	-0.112089	7.16723e-08													-0.111658	1.82086e-16
Arl13b													-0.013417	0.00408618			-0.0352363	0.00234718
Arl2bp																			-0.0889151	3.92154e-07
Arl4c													-0.0277646	9.71572e-05					-0.0720257	1.50345e-06	-0.0913608	4.19902e-06																	-0.0841713	8.29534e-06
Arl5a			-0.00272378	0.00622353									0.0102304	0.000283072
Arl5b													-0.0215034	0.00129824	-0.0550867	9.07099e-05	-0.0523758	4.4372e-05	-0.0354781	3.11964e-05	-0.0316213	0.00242946																	-0.0421864	0.000102586
Arl6ip1													-0.0390629	0.00301223							-0.142933	9.34885e-07							-0.201943	0.00847793									-0.124539	3.50611e-06
Arl6ip4	0.0432785	0.00264792											0.0298608	2.31413e-05			0.142342	3.94324e-09	0.0706614	1.2852e-05	0.0769186	0.00407112																	0.0823298	0.000863593
Arl6ip5															0.0481252	0.00918104
Arl6ip6													-0.0294851	0.000569673					-0.0465371	0.00337617
Arl8b					0.0288883	0.00362061							0.0262497	1.74236e-05
Armc1	0.0668348	1.75496e-06	0.0614147	0.000131792									0.062809	7.23989e-14			0.101974	1.73018e-06	0.0663502	6.367e-06	0.0809896	0.000191615																	0.0726649	0.000697674
Armc10															-0.0717759	1.9163e-05			-0.0474988	0.00182772																			-0.0611058	0.00219321
Armc3	-0.0530797	1.24671e-05			-0.0697425	0.000173161							-0.0536098	1.40907e-10	-0.0635012	2.01997e-05			-0.0248672	9.72146e-05																			-0.0353718	0.00223618
Armc5			0.00774321	0.00646628
Armc6	0.0163806	0.00622917											0.0144979	0.00109818	0.0300233	0.00675835	0.0453775	0.00014118	0.0281155	0.000405543	0.0575262	1.0477e-07			0.0635464	0.00430712													0.056962	6.29466e-09
Armc7																			0.0154913	0.00917418
Armc8	0.0238893	0.00998888											0.0206629	0.000881838
Armcx1	-0.0680266	2.61359e-09	-0.0822615	1.25371e-05	-0.059686	0.000865307							-0.0771746	1.51549e-22	-0.121852	1.541e-17	-0.107426	1.89661e-11	-0.101028	1.43833e-18	-0.0836759	1.48711e-10	-0.0899126	0.00332675	-0.0757422	0.00130444			-0.132021	0.000103161									-0.102177	5.61559e-15
Armcx2	0.0454426	3.486e-07											0.0385568	2.30162e-07					0.0405415	6.03924e-05
Armcx3	0.0890035	3.42826e-10											0.0486195	3.12721e-08	0.0527866	0.00167968	0.0805576	0.00029364	0.0429584	0.006838
Arntl	-0.0232041	0.00882821											-0.019385	0.000948603	-0.0275187	0.00987459	-0.0458049	0.000410317	-0.0295307	0.000311999	-0.038955	7.86585e-05																	-0.0382398	9.72269e-05
Arpc1a													0.0218432	0.000726592
Arpc1b	0.256045	1.614e-54	0.217452	1.36315e-26	0.285732	7.18865e-41							0.256345	3.01109e-128	0.290252	5.95297e-62	0.244568	5.43836e-36	0.15385	3.44057e-26	0.174803	1.26874e-22	0.212077	2.29201e-10	0.101085	0.00517413	0.300929	1.29556e-14	0.212476	2.76554e-07									0.208067	3.83925e-35
Arpc2													0.0559959	9.2787e-07			0.057141	0.0080874	0.0298569	0.000216019
Arpc3													0.0296567	0.00381906
Arpc4			0.052935	0.00951017									0.0427778	0.00558343
Arpc5	0.0583388	0.00234332	0.0876706	0.000136751									0.0639245	6.41771e-07					-0.0532162	0.000962417
Arpc5l	0.1387	5.41374e-17	0.108019	4.60088e-06	0.135903	9.7669e-08							0.129769	2.86834e-30	0.162435	6.57229e-17	0.148556	3.77902e-13	0.145239	1.51431e-21	0.12382	2.6533e-10	0.113538	0.00541582	0.212016	3.82595e-06	0.131312	0.00924279	0.115253	0.00614077									0.150308	2.18889e-15
Arpp21																					-0.0683102	0.000692295
Arrb1					-0.0519189	0.00788586							-0.0457366	5.5665e-08			-0.0594026	0.00027026	-0.0270648	0.000758094
Arrb2																			-0.0521445	0.000598464	-0.0499458	0.00450599																	-0.0499772	0.000989594
Arrdc1					-0.066903	0.00192824									-0.058237	0.00552864			-0.0716961	1.04085e-06	-0.0555899	0.0013674
Arrdc3			-0.0582803	0.0013921									-0.0304656	0.00170447
Arsa													-0.022294	4.33305e-06	-0.0339359	0.00113679			-0.0230763	0.000711027	-0.0242355	0.00884877																	-0.0249406	0.00613853
Arsk	-0.0419846	0.000140026	-0.0515625	0.00612755									-0.0405588	1.63832e-07	-0.0700799	7.56225e-07	-0.0630987	8.03893e-05	-0.0340598	0.00101807	-0.0584938	1.23652e-05																	-0.0607792	2.3698e-06
Art4	-0.120909	1.08031e-13	-0.177327	2.48216e-15	-0.153656	5.41832e-11							-0.148617	6.27241e-44	-0.0721614	4.00107e-17	-0.101755	2.42356e-10	-0.0794176	8.16863e-23	-0.0447427	1.16223e-13	-0.0349163	0.00275502	-0.0397913	0.00246167	-0.0875918	0.00248433	-0.0539186	0.000527939									-0.0616371	1.27306e-14
Arv1																			0.0214221	0.00433836
Arxes2																			-0.0145619	0.000297213
As3mt			-0.0254514	0.00970571											-0.0784873	0.00146162			-0.0776615	5.21207e-06
Asah1	-0.0898331	3.09258e-07	-0.133089	3.07632e-08	-0.0731411	0.00213633							-0.107158	1.43643e-20	-0.0799233	3.82072e-05	-0.130873	3.73383e-09	-0.0756426	4.53084e-08
Asah2	-0.0267575	4.12211e-05											-0.0169487	0.000259775							-0.021979	0.00427632
Asap1	-0.0925845	2.04383e-06	-0.0995214	9.00734e-05	-0.109173	2.91572e-05							-0.101645	2.51096e-17	-0.0739601	0.000843364			-0.080809	3.70415e-05																			-0.0681745	0.000526288
Asb3													-0.00578358	0.00804742	-0.0369562	0.000751845
Asb6																	0.0414635	0.00139645
Asb8																	0.0374538	0.00233987
Ascc1			-0.066531	0.00308806									-0.0521274	5.43027e-06	-0.0870799	4.70656e-05	-0.0661206	0.00999833	-0.10344	2.36684e-12	-0.0768034	0.000277089			-0.117831	0.00260741													-0.0817449	4.05103e-05
Ascc2																			0.0256412	0.0058896			0.0710454	0.00769501
Ascc3													0.0332112	0.00267196					0.0639733	8.88792e-06	0.0628811	0.00147193
Asf1a													0.0423881	1.06436e-05	0.0581416	0.00391048	0.0714447	0.0043681	0.0632643	0.00070001	0.0920737	0.00017805																	0.100905	1.57685e-05
Ash1l			0.0982291	0.000550449									0.0587503	6.45412e-05					0.0744131	0.000210724
Ash2l	0.0429906	0.00178027			0.0677357	0.00133211							0.0544007	7.05879e-08	0.0387395	0.000728427	0.0726463	9.00637e-05	0.0726844	1.77576e-08	0.0855398	0.000482709			0.154107	0.00317873													0.0889134	4.79319e-05
Asl													-0.0326093	0.000732395	-0.0726174	4.39468e-05	-0.0589045	0.00687093			-0.0581271	0.000100042																	-0.0662173	2.33563e-05
Asna1																	0.0322115	0.00139965
Asns	0.227148	7.37991e-41	0.101903	1.96862e-11	0.143506	9.77418e-18							0.171723	3.65384e-79	0.242296	6.88704e-55	0.199187	8.65201e-29	0.185937	1.8889e-50	0.214257	2.34151e-44	0.228155	5.90079e-09	0.179669	5.94598e-09	0.253095	1.02046e-08	0.254117	5.95472e-17									0.21487	3.53317e-43
Asnsd1													-0.0354696	0.000736702	-0.0620682	0.00505119
Aspm																			0.0557044	0.00377783
Aspscr1															-0.068536	0.00152597	-0.0566651	0.00957454	-0.0526358	0.00276088																			-0.0590077	0.00531579
Asrgl1													-0.0252452	0.00267702
Ass1	-0.0463216	0.000127091	-0.0381084	0.00938131									-0.0348268	6.79581e-07	-0.0774454	8.39567e-05	-0.0512708	0.0054525	-0.0798021	2.72366e-05	-0.104189	8.65299e-05																	-0.0882005	0.000343128
Aste1																					0.015837	0.000434416
Asxl1															0.0521545	0.0012405			0.0495173	0.001123
Asxl2													0.0368347	0.00422333			0.0499176	0.0035058	0.0556112	4.65193e-05	0.0846721	2.51195e-05																	0.0558585	0.00493751
Atad1																	0.0733953	0.000186943	0.0454489	0.00478222	0.0688258	0.000188821																	0.0524578	0.00644214
Atad2															0.127541	1.24592e-06			0.0793611	0.00146318	0.0316958	0.002614	0.150441	0.0025202															0.0765214	0.000714914
Atad2b	0.0340785	0.00264475											0.0286134	0.00604924			0.059879	0.00759952	0.0508732	0.00160239
Atad3a	0.211926	4.3427e-28	0.0915495	7.69656e-06	0.100722	1.9951e-07							0.154548	1.09818e-45	0.281625	2.69279e-45	0.268223	6.80528e-33	0.279069	1.67519e-66	0.367264	4.13572e-65	0.336864	6.97826e-16	0.311319	3.48823e-17	0.292307	2.28254e-09	0.358129	1.0467e-15									0.340631	1.16777e-59
Atad5	-0.0339218	3.10424e-05											-0.0167409	0.00352429	0.0458613	0.00504241
Atat1															-0.061022	0.000771165					-0.0877566	8.5976e-09	-0.10464	0.00320377															-0.0777635	2.04006e-07
Atf1			0.0718284	0.00427792									0.0404688	0.000859311			0.0338203	0.00858159
Atf3																			-0.0508609	1.72262e-05
Atf4	0.200634	1.68373e-16	0.126889	2.46554e-05	0.159094	9.44912e-09							0.161707	3.99393e-29	0.242826	1.15096e-19	0.163116	8.25695e-09	0.142628	1.09447e-15	0.249805	4.80439e-26	0.254932	1.14233e-08	0.211256	1.85656e-05	0.212561	5.18615e-05	0.330285	3.00354e-06									0.233892	1.21962e-22
Atf5	0.094102	3.7207e-11	0.0673944	2.753e-07	0.0680161	6.26481e-05							0.0790369	2.20709e-26	0.0429211	0.000300126	0.0392281	0.000251763	0.0327903	0.000814407
Atf6	0.0799139	1.22846e-10			0.0566372	0.0014881							0.0525969	4.02389e-12	0.0598802	6.66306e-06	0.0377144	0.00254048	0.0283641	0.00010821	0.0375101	0.00550353																	0.0458889	0.00147506
Atf6b	0.0630789	5.31813e-06											0.0408306	3.7182e-06			0.0185915	0.00197809
Atf7ip	-0.0617139	0.00358408			-0.0929375	0.00171566							-0.0710899	3.09863e-08	-0.154189	3.83922e-10	-0.109868	6.78851e-05	-0.11131	1.60979e-09	-0.162055	2.4827e-12	-0.132307	0.00494805	-0.14633	0.000333864													-0.143314	4.16019e-11
Atg10															-0.0648277	1.63986e-05
Atg12															-0.0498118	0.00993231			-0.0594899	2.5819e-07	-0.060802	0.000252391																	-0.0571832	0.000692156
Atg14																			-0.0207324	0.00896926	-0.0311618	0.00202598																	-0.0194411	0.00882166
Atg16l1																			0.0331873	0.000939037
Atg16l2													-0.0135215	0.00830429	-0.0254647	0.00113038
Atg2a															-0.0446157	0.000934069					-0.0443259	0.000501263																	-0.0505106	1.47567e-05
Atg3													0.0208516	0.000863944	0.0338193	0.000360296
Atg4b	0.0535837	0.000710615			0.0682382	8.09027e-05							0.049487	4.61633e-09
Atg4c													-0.0186399	0.00366921					-0.0227609	0.00317105
Atg5																	0.0387349	0.00371843	0.0267858	0.00344605	0.0614094	0.000587011
Atg7															-0.0528937	0.00142315
Atg9a															-0.0292348	0.00291999			-0.0191047	0.00034085	-0.0289059	0.00375698																	-0.0332474	0.000546535
Atg9b																			0.0228699	0.00020353	0.0199993	0.000257381																	0.0229545	0.00353933
Atic					0.0901299	0.00347159							0.0771191	1.29597e-08	0.143757	3.50309e-09	0.132776	4.14806e-07	0.167988	7.95282e-21	0.105033	1.80779e-05					0.13523	0.0068606	0.20935	0.0067051									0.119317	1.00031e-07
Atl3															0.0277296	0.006532
Atox1																			-0.0923207	7.0255e-07
Atp11a															0.0251139	0.00208702
Atp11b	-0.0745196	3.8763e-05			-0.12345	3.43436e-05							-0.0856606	6.94465e-11	-0.164461	2.07457e-10	-0.126321	4.57949e-06	-0.131522	9.89593e-13	-0.228768	2.8109e-23	-0.243366	6.26389e-09			-0.143984	0.00698987	-0.249507	6.69435e-05									-0.20354	1.09533e-19
Atp13a1	0.0345651	0.000767279	0.0449881	0.00443085	0.0470324	0.00660775							0.0386396	1.60008e-08					0.0387033	0.00406194	0.0433936	0.000222367																	0.0492558	0.000367029
Atp13a2	-0.0846337	5.60664e-06											-0.0714523	3.38868e-10	-0.119765	3.81817e-08	-0.099426	6.94593e-05	-0.0899151	3.38998e-07
Atp1a1	0.150042	4.08785e-14	0.159541	1.24057e-11	0.145642	6.99982e-10							0.155912	4.97087e-38	0.156165	5.5397e-12	0.101835	0.000308838	0.110455	2.70878e-12	0.17266	3.03739e-14	0.148912	0.00195304	0.163335	7.05127e-05													0.142152	4.11195e-13
Atp1b3													0.0341123	0.00381158	0.101132	7.01204e-06	0.124782	1.51679e-06	0.0630258	0.0004144	0.0986623	0.000150498							0.216043	0.0014265									0.0989704	0.000138391
Atp23					0.0688257	0.000221845							0.0401745	1.38101e-06	0.123926	8.21709e-13	0.0839416	6.44367e-07	0.0938772	7.81698e-13	0.144749	7.92968e-20	0.152474	1.34342e-05	0.138055	0.000123715			0.137048	3.93557e-06									0.142069	2.03833e-17
Atp2a2	0.0919467	5.49773e-09	0.058178	0.000496046	0.0669905	0.00493319							0.0790172	6.71962e-17	0.166967	4.34957e-16	0.167449	1.31152e-14	0.168836	1.05008e-25	0.189729	4.25151e-23	0.198015	2.82216e-08	0.182337	1.03292e-06			0.220451	2.77268e-05									0.184749	5.19976e-22
Atp2a3	-0.0725746	9.61849e-06	-0.0685114	0.00259352									-0.0651787	5.65313e-10	-0.0695293	0.000129948	-0.0654785	0.00503374	-0.0789258	8.1204e-09	-0.081004	2.69917e-06																	-0.0747421	7.28534e-06
Atp2b1			0.0716325	0.00764068									0.0424081	0.00201287			0.0694853	0.00710931	0.0716362	0.000114748	0.0763456	0.00105914																	0.0725556	0.00109845
Atp2b4	-0.105802	5.78845e-07			-0.123024	6.98592e-05							-0.0986353	4.14222e-13			-0.086273	0.00468553
Atp2c1													-0.0230323	0.00635818
Atp5b													0.0354032	0.00801248	0.149357	1.35232e-15	0.110746	6.3459e-08	-0.0535755	0.000342219	0.0601534	0.0026128																	0.0688963	0.000353428
Atp5c1	-0.0822028	0.000140506											-0.05357	3.31416e-05	-0.0848663	5.85167e-05			-0.122934	8.03288e-21	-0.0636262	0.000107052																	-0.0596416	0.00211159
Atp5d			0.0672956	0.00281293	0.107469	1.17183e-05							0.0705977	3.50024e-09	0.0886356	2.53328e-06	0.0628018	0.0041619	0.052975	0.000545063																			0.0572664	0.00391798
Atp5e	-0.109172	2.49181e-08													-0.0689559	0.00796166			-0.100271	3.60568e-11
Atp5f1	0.136548	2.00512e-12	0.16616	6.24099e-17	0.141726	3.46465e-09							0.152917	2.25963e-43	0.131195	1.99434e-15	0.149549	9.42192e-16	0.0427626	0.00687426	0.0767192	4.64285e-05					0.142617	0.00177647											0.0948408	2.59532e-08
Atp5g1	0.148509	1.20315e-15	0.117802	7.41202e-07	0.237134	3.47112e-25							0.177352	7.91846e-50	0.302196	1.75449e-54	0.224554	4.03809e-25	0.127011	7.64964e-15	0.199993	1.1303e-23	0.246231	2.66817e-12			0.272222	5.63278e-13	0.265323	9.65793e-07									0.219795	8.28358e-33
Atp5g2	-0.0774171	1.26987e-06															-0.071843	0.000730843			-0.0596603	0.00157498
Atp5g3	0.061966	0.000443138	0.0871723	0.00126538	0.107932	3.1801e-05							0.09218	3.41279e-14	0.0831848	0.000512429	0.0956588	8.8586e-07	0.0884077	1.99321e-07	0.162886	1.47037e-14	0.191252	1.90806e-06															0.130389	1.15079e-10
Atp5h	-0.0621529	0.00860986
Atp5j	0.0703498	0.00253733			0.0631655	0.00313337							0.066791	7.56572e-09	0.0795158	5.18877e-05
Atp5j2					0.102602	4.52863e-06							0.0523826	1.29231e-05
Atp5l																			-0.0468346	0.00769804
Atp5o-1	0.118316	1.78886e-07	0.11281	1.6729e-05	0.148599	4.4592e-10							0.133339	8.4629e-25	0.148335	6.4472e-12	0.0687363	0.00468481																					0.0664422	0.00155751
Atp5s													-0.0191696	0.00623392																									-0.0292807	0.00473611
Atp6ap1																			-0.0445899	0.00290974
Atp6ap2	-0.0724433	0.000146995											-0.0559716	2.39496e-06					-0.0774545	2.31375e-05	-0.081219	0.000441853							-0.18743	0.0060645									-0.0715515	0.000677683
Atp6v0a2													0.0162077	0.00241198	0.0518996	0.00147558	0.0617072	0.000269613
Atp6v0b															-0.105577	2.43982e-05					-0.0655485	0.00898161																	-0.0665676	0.00442987
Atp6v0d1																			-0.0770738	3.27712e-06
Atp6v1a															-0.0626865	0.00400835	-0.098742	6.88503e-07	-0.0671717	3.9838e-06	-0.0624324	0.000249299																	-0.0593303	0.00118818
Atp6v1b2															-0.0729028	5.68903e-06
Atp6v1d	-0.0813774	0.000119654			-0.0806211	0.00747383							-0.0750587	2.42216e-09	-0.107198	5.54797e-06	-0.128375	1.00388e-07	-0.124725	3.26946e-14	-0.132471	7.04244e-10	-0.143517	0.000752132					-0.190162	0.00287713									-0.119894	6.84687e-09
Atp6v1e1	-0.0562014	0.0069062											-0.0309367	0.00845466					-0.0778769	1.97211e-05
Atp6v1g1													-0.031202	0.00510543					-0.0519742	0.00806301	-0.084409	0.000256981																	-0.0631313	0.00890115
Atp6v1g2					-0.0394947	0.00175108							-0.0224419	0.000169546							-0.0180268	0.00724729	-0.0524929	0.00371983															-0.024907	0.000746779
Atp7a															-0.0265918	0.00955645					-0.0231125	0.00982773																	-0.0250826	0.00545685
Atp8b4																					-0.0564989	0.000108676																	-0.0319722	0.00623129
Atp9b																			0.00851305	0.00257112
Atpaf1	0.0237106	0.00431584											0.0273973	1.38991e-05			0.0576105	0.00942344
Atpaf2																	0.00126749	0.00523336
Atpif1	-0.202197	2.2028e-20	-0.120258	2.74788e-07	-0.113577	6.05614e-05							-0.142337	3.54812e-28	-0.0780412	0.00118095	-0.113497	2.65265e-08	-0.127987	7.55165e-15																			-0.0530423	0.00269149
Atr																	0.0614711	0.00641241
Atraid	-0.061735	0.00948208	-0.0779297	0.00124049	-0.0809102	0.00718405							-0.080073	8.4731e-10	-0.114811	1.86867e-06	-0.152652	1.9252e-10	-0.0794899	4.4098e-06	-0.127374	5.65749e-09	-0.132698	0.00547901															-0.10468	1.51571e-06
Atrip	0.0522555	0.000357968											0.0323326	0.00018678			0.0393079	0.00944267			0.0572444	0.000241013	0.111702	0.000481807															0.0505698	0.000697862
Atrn													0.0187302	0.00424909	0.0344577	0.000173885			0.0294206	0.000481094
Atrx																	0.0983983	0.000273291	0.113499	1.05426e-10
Atxn1															-0.0397448	0.00635642
Atxn2					0.0596585	0.00825977							0.0406655	4.33622e-05	0.063266	4.41122e-05	0.0681892	5.43077e-06	0.0779775	2.30453e-09	0.0781273	4.79799e-05																	0.0728371	8.44769e-05
Atxn2l	0.0374926	0.00201942											0.0375516	8.45992e-05
Atxn7															-0.0768076	7.85341e-05			-0.0451793	0.00148037	-0.0681267	6.99772e-05																	-0.0732991	1.01439e-05
Atxn7l1			-0.077439	0.00102814	-0.0611786	0.00834464							-0.0620606	7.90391e-10	-0.0854025	6.09481e-05	-0.0682725	0.00310241	-0.0716175	2.53004e-06	-0.076021	6.40561e-05																	-0.069874	0.000179953
Atxn7l3	0.0505659	0.000144661			0.048339	0.0019117							0.0424315	9.67855e-09	0.0584121	8.21367e-05	0.0488509	0.00696236	0.0505459	1.74625e-05
Atxn7l3b	0.105731	1.51831e-05	0.0635672	0.00972632									0.0691501	8.18544e-08					0.0700604	0.000335759
Auh													-0.0287592	0.00476597	-0.0713068	0.00019642	-0.0683327	0.00112558	-0.0685612	2.95615e-07	-0.0566451	0.00509052																	-0.0532547	0.00336253
Aunip															0.0289426	0.000891697	0.0691549	3.76754e-07	0.0675584	2.57416e-05	0.0615506	0.000605264																	0.0565809	0.000913073
Aup1	0.0684298	0.000589339	0.0727727	0.0015464									0.0497591	9.2658e-06
Aurka																																							-0.0455693	0.00988567
Aurkb																			0.0714047	0.00389668
Auts2															-0.0312177	0.00383785					-0.0372553	0.00438528
Aven			0.0241368	0.00312673									0.0293517	0.000337702	0.0884088	2.48117e-05	0.0915335	0.000111287	0.0515056	0.00179756	0.0518475	0.00652581																	0.0705466	0.000195517
Avl9	-0.123656	5.35847e-09	-0.0826524	0.00395307	-0.197962	1.8069e-13							-0.135722	1.01781e-24	-0.134518	2.61223e-08	-0.15002	1.32733e-09	-0.0933415	6.04932e-10	-0.0664651	0.000766821																	-0.0881374	1.45307e-05
Avpi1													-0.0196012	0.00156547
Axin1	0.0201826	0.000373484			0.0704122	0.00189349							0.0421113	3.40399e-07	0.0743899	6.45709e-05	0.0783654	4.46892e-06	0.065303	3.22544e-06	0.0556212	0.00852854																	0.0583324	0.00342826
Axl																	-0.0271924	0.00162642
Azin1	0.0930456	4.33211e-10	0.0470003	0.000139238	0.0563424	0.00500951							0.0682794	4.38913e-15	0.145647	2.22767e-14	0.115828	6.7405e-09	0.117009	9.36972e-15	0.127009	2.09228e-09					0.141972	0.00208554	0.186877	0.000562758									0.140467	1.75008e-12
Azin2													-0.0204495	0.000183056	-0.0223305	0.00435998	-0.024044	0.00870474	-0.0172442	0.000657277
B230118H07Rik	-0.082979	9.94676e-09	-0.0592507	0.00305818									-0.0710277	1.44513e-13	-0.120705	2.08119e-09	-0.110967	1.02159e-06	-0.0682095	2.40602e-05	-0.145952	5.71472e-11	-0.167478	0.000109306	-0.16181	0.000129302													-0.151084	6.93457e-14
B230217C12Rik																	-0.0332278	0.000256953
B230307C23Rik																			0.0331243	0.00276044
B230369F24Rik																			-0.024012	0.000143861
B2m	-0.208654	1.2667e-64	-0.175201	2.22614e-35	-0.163553	5.31727e-27							-0.190368	1.83946e-137	-0.204933	7.9436e-48	-0.16998	1.03441e-29	-0.184778	5.7448e-52	-0.239108	1.3775e-59	-0.243981	1.78589e-17	-0.184893	2.37275e-12	-0.128255	0.000246546	-0.246659	5.84569e-16									-0.208265	4.05498e-50
B3galnt2																	0.0532287	0.00335831	0.0336502	0.0015089	0.0653619	0.000124224
B3galt6	0.035961	0.00718859											0.0251903	0.000498308					0.0536324	0.000177786
B3glct													-0.0185821	0.00721908			-0.0283632	0.00317383	-0.0269929	0.00538601
B3gnt5																					-0.0958084	1.61523e-09							-0.122021	0.00383797									-0.0641636	2.32183e-05
B3gnt7																			0.0427848	7.20068e-14
B3gnt8	-0.0222615	0.00987284											-0.0194335	0.000354406	-0.027208	0.00281103					-0.0362716	0.000177022
B4galnt1					0.0381572	0.00663643							0.0342423	2.64423e-05	0.102574	1.15754e-06			0.0538527	0.00148032	0.156528	3.64062e-12	0.141472	0.00292867					0.174638	0.000334068									0.131787	3.65843e-10
B4galt1																			-0.0347527	0.00347937	-0.0553928	0.000120518																	-0.0397178	0.00231556
B4galt5																			0.0272498	4.53671e-05	0.0329677	0.00371618							0.0713135	0.000342816
B4galt6					-0.0665453	0.00062276							-0.0396146	2.29921e-06													-0.0799626	0.00791899											-0.0378495	0.00269591
B4galt7																	0.0142821	0.00253097
B4gat1	-0.0383673	0.000340724											-0.0213387	0.00224909
B930036N10Rik																					-0.0324504	0.000218273																	-0.0256654	0.0064661
B9d2															-0.139559	1.95697e-09			-0.0893564	1.98599e-06	-0.0947004	5.18695e-06	-0.162864	5.01246e-05															-0.131852	8.65632e-10
BC003331															-0.0705503	0.000462093
BC003965	0.0818244	1.24794e-06	0.0485681	0.000941941									0.0711021	1.21698e-13	0.0887138	5.34514e-06	0.111483	1.20859e-06	0.127519	7.81983e-17	0.159216	2.41589e-15	0.203806	4.11709e-07	0.106837	0.00769858			0.175346	0.00201943									0.139253	4.57359e-13
BC004004																					-0.0605863	0.00997278
BC005537	0.0465726	0.000473879											0.0483546	6.92253e-05	-0.00720175	0.00732434
BC005561	0.0777008	8.66216e-06	0.0777529	0.00130788	0.145802	4.59147e-10							0.094886	4.58703e-18	0.129577	6.29621e-10	0.12283	7.01758e-07	0.0779749	5.16126e-08
BC005624													-0.0366598	0.002719					-0.0641007	0.000909576
BC016579																					-0.0335156	9.86976e-05
BC028528	-0.107945	4.57166e-11	-0.107259	1.00837e-07	-0.0792222	0.000821677							-0.100207	6.03928e-23	-0.233084	4.49086e-27	-0.181247	8.18872e-16	-0.150059	9.23848e-22	-0.194413	8.98818e-21	-0.200862	1.06554e-06	-0.164785	8.82673e-05	-0.19071	3.19128e-06	-0.204673	0.000600425									-0.194327	3.6456e-22
BC035044																					-0.0856066	0.00365371
BC052040	-0.0222838	0.00587463											-0.0145663	0.00521209							-0.0380562	0.000776618
BC147527															-0.0247547	0.00159125	-0.0276088	0.000793717	-0.021898	1.21712e-05	-0.0237477	0.00876916																	-0.0240282	0.00489726
Babam1																					-0.073437	0.00253939
Bace1	-0.0341103	0.00234908											-0.032493	1.05283e-05	-0.042607	0.000137076	-0.0485556	0.00103689	-0.027761	0.000950425	-0.0601379	3.00582e-07	-0.0919878	0.000272975															-0.0463115	3.24498e-05
Bach1																			-0.041369	0.00231368
Bach2	0.0359295	5.74868e-05	0.0429686	0.00191445	0.0454826	0.00141145							0.0399414	1.53676e-11	0.0290126	0.00936565
Bad													0.0252472	0.000192214					-0.026075	0.00265996
Bag1	0.0774901	0.00339877			0.107113	5.58432e-05							0.087668	1.5193e-11	0.136103	3.62097e-09	0.147665	1.21235e-10	0.0661546	0.000123437	0.0885472	5.74158e-05																	0.0894004	1.78306e-05
Bag2	0.0448558	5.7309e-06			0.0614931	0.000977093							0.0463253	1.3402e-11	0.161697	4.06055e-18	0.113781	3.89734e-08	0.1333	1.77619e-19	0.182782	3.17362e-21	0.186647	9.25749e-06	0.212205	1.48667e-07			0.106178	4.61974e-06									0.173702	1.66196e-21
Bag3													0.0183666	0.000290473					0.0218734	0.000155489
Bag5	0.0437927	0.00464918	0.0748238	0.000102738	0.0689097	0.00189349							0.0627861	2.80933e-10	0.113107	3.97725e-10	0.119825	6.06614e-10	0.0993181	2.12004e-14	0.122181	9.87871e-10	0.164378	2.47326e-05															0.109388	1.77111e-09
Bahcc1	-0.0377783	0.000444946											-0.0284385	8.03534e-05			-0.0568092	7.65112e-05	-0.0332218	0.00180843	-0.040855	0.0018706
Bahd1			-0.0189192	0.00787582
Baiap2																			0.0815452	6.96458e-13									0.131196	0.00049889
Bak1			0.070209	0.000176725									0.050156	9.06165e-07					0.0591107	1.45061e-05
Bambi	-0.0374051	0.00180798											-0.0307068	3.76442e-05
Banf1	0.0816225	5.87265e-05	0.0977804	0.000370524	0.13336	1.29122e-07							0.118193	3.60121e-18	0.147064	1.95414e-08	0.138244	5.7203e-09	0.0830179	6.10644e-08	0.0675948	4.43878e-05	0.143568	4.23598e-05			0.153739	0.00251846											0.0968489	3.34836e-06
Banp	0.0676054	2.00528e-07											0.0382462	1.21382e-05			0.0593276	0.00288624
Basp1	0.335358	1.68949e-55	0.236678	7.08629e-25	0.303617	1.18892e-31							0.293829	2.37765e-112	0.364118	4.4309e-58	0.310338	2.12357e-39	0.25654	2.70268e-51	0.255145	1.98127e-27	0.261323	7.18425e-09	0.223644	8.18959e-06	0.360929	1.34014e-14	0.355567	6.60086e-09									0.290742	6.54251e-39
Batf	0.0251697	0.00147334	0.00423041	0.000130442									0.0186292	0.00116088					0.10888	2.67284e-12	0.0893687	2.77807e-05			0.160178	5.2889e-06			0.195402	2.5551e-05									0.0751694	0.000867794
Bax			0.0687582	0.00321319	0.0898471	0.00138527							0.0614381	3.36922e-07	0.0959427	0.000254719	0.112588	2.61562e-05			0.0818208	0.000536377																	0.0964407	3.52924e-05
Baz1a	0.108226	1.76016e-13	0.117968	1.53586e-14	0.143709	1.83551e-17							0.129613	3.101e-49	0.286078	4.60217e-44	0.301547	9.19984e-44	0.242416	1.11393e-42	0.271582	1.81898e-32	0.272646	5.38103e-10	0.260697	1.54495e-10	0.285236	2.98808e-10	0.346123	1.21704e-10									0.295569	4.63646e-41
Baz1b	0.108314	8.20609e-06			0.106432	8.5477e-07							0.083423	1.82892e-11	0.22516	1.67717e-21	0.257818	5.5348e-24	0.200709	6.8282e-28	0.147688	2.29639e-09	0.200455	9.25749e-06	0.185353	0.000776344	0.199481	0.000204994											0.198256	4.1182e-17
Baz2a																	-0.0185134	0.00590879
Baz2b	0.0627474	2.96287e-05											0.035492	8.05496e-06	-0.0520693	0.00310955	0.05154	0.00530482	0.0294407	0.000506552	-0.14395	5.1279e-09							-0.215352	0.00216422									-0.123405	4.98632e-07
Bbc3	0.0288931	0.00713278											0.0129676	0.00711625	-0.0551966	0.000350664			-0.032177	0.000388438
Bbs12																			0.0328565	3.55575e-05
Bbs4	-0.0290895	4.06819e-05	-0.0375862	0.00110573									-0.0344509	5.79146e-11			-0.0611832	2.88721e-08	-0.0337068	5.20346e-08	-0.0394105	0.000103678																	-0.0422038	2.90615e-05
Bcap29	0.066471	0.00364523											0.0578244	4.67877e-06	0.139557	6.94378e-10	0.0823452	2.05318e-05	0.0831896	2.11625e-07	0.14166	6.62445e-09	0.201148	7.556e-06					0.179761	0.00237214									0.140808	8.76816e-10
Bcap31															0.000189479	0.00186559
Bcas2	0.051936	0.000266547											0.0545436	1.98704e-07	0.104884	1.96449e-06	0.0939231	1.27095e-05	0.0646431	0.000370917							0.10709	0.00735758
Bcat2					-0.0405273	0.00829738							-0.016942	0.000984221
Bccip			0.093363	5.60658e-05	0.0815228	0.00408551							0.0759143	1.94618e-09	0.07604	1.04869e-05	0.0467849	0.00512522			0.0766379	0.00105852																	0.0650487	0.00152706
Bcdin3d													-0.0228466	0.000464734	-0.0772735	1.00002e-08			-0.03829	0.00048742	-0.0583753	4.97925e-05																	-0.0554643	6.4501e-05
Bckdha													-0.0420994	0.00032683	-0.143577	5.39959e-13	-0.0805616	0.000166994	-0.0841932	6.06091e-10	-0.145814	9.86537e-15	-0.155644	9.28928e-05	-0.119164	0.000484	-0.160959	0.000224552	-0.156993	0.000249369									-0.15626	7.65983e-19
Bckdhb	-0.0286001	0.00128064											-0.0190298	0.00074384			-0.0616208	5.4706e-06
Bckdk													-0.037323	0.00364537					-0.0599988	0.00265449	-0.0604684	0.00559874																	-0.073775	0.00188105
Bcl10	-0.0751289	9.70959e-05											-0.0742755	1.19163e-10	-0.123114	1.43066e-08	-0.0882621	0.000441505	-0.109301	2.78574e-11	-0.0904888	1.54152e-05	-0.142274	0.000357146			-0.1395	0.00977077											-0.122676	2.58606e-10
Bcl11a	0.108412	8.43749e-05	0.0931207	7.65288e-08	0.104299	0.000309542							0.0940284	1.4076e-14	0.149504	6.52762e-10					0.22538	4.34292e-17	0.155535	0.00433874	0.249849	2.85131e-07			0.20887	0.00480749									0.178475	3.68037e-12
Bcl2	-0.0594494	0.00848953											-0.0577669	5.88286e-06
Bcl2l1																	-0.0122435	0.00824152	0.016779	0.00838436	0.0422569	0.0010576							0.104493	0.0030802
Bcl2l11																			-0.0287722	0.00292751
Bcl2l12	-0.0539058	0.00347762
Bcl2l2																					-0.0249655	0.0026842																	-0.019186	0.00339994
Bcl3	0.107366	3.56342e-22	0.151577	1.88199e-21	0.121251	8.05358e-21					0.219123	0.000524487	0.116581	2.31887e-68	0.123109	1.27487e-31	0.0992866	1.30241e-20	0.136465	2.71688e-53	0.185244	3.81602e-47	0.170434	3.68788e-09	0.182099	7.8628e-19	0.174688	1.16588e-06	0.221329	1.10928e-13									0.165547	2.61039e-48
Bcl7a															0.0552328	0.00185286	0.0328443	0.00530473	0.0501605	0.000158089
Bcl7b																			-0.0555206	0.000282717
Bcl9l															-0.0476757	0.00226294					-0.0559159	0.00162402							-0.0838663	0.00632485									-0.0530466	0.00155532
Bclaf1	0.0491086	0.00917541	0.101799	0.000207884									0.0644657	1.984e-06	0.0896083	0.000295263	0.100321	2.8589e-05											0.166261	0.00560865
Bcr															-0.0545792	6.01816e-06
Bcs1l																			-0.00289419	0.00864954
Bdh2	-0.0447837	0.000111157			-0.0465414	0.00642081							-0.0366563	9.78056e-08	-0.0535833	0.000339811																							-0.0287169	0.00841541
Bdp1	0.0682689	0.000100036			0.0561637	0.00482498							0.0599797	5.66069e-10	0.141935	1.51097e-14	0.124066	3.24757e-09	0.139955	1.18068e-19	0.113887	3.476e-08	0.119148	0.00983447	0.116118	0.00216812													0.103991	6.3082e-08
Bend3																			0.0282843	3.53327e-05	0.033869	1.11596e-05	0.050873	0.00853113															0.0315944	3.9804e-06
Bend5															-0.0459532	0.000181435
Bend7					0.0473045	0.00442658							0.022696	0.000892437
Bet1	0.115682	9.5406e-20	0.0609947	0.00499009	0.0790955	3.9441e-05							0.08575	1.34108e-24			0.134086	5.06759e-11
Bet1l													0.0337322	0.000648338			0.0512591	4.26751e-06
Bex1	-0.0296775	0.00768345											-0.0472303	0.00107766
Bex4													-0.0652186	2.70652e-05					-0.0385656	0.000875172
Bfar	0.061876	0.0037133	0.0661141	0.00504335									0.0631749	2.59695e-08
Bgn					-0.0835799	0.000526072							-0.0544892	6.64556e-07	-0.0550943	0.000174512	-0.102862	3.75599e-06	-0.0672869	5.90621e-10																			-0.0307961	0.00495099
Bhlhb9	0.00777112	0.00390676											0.0195011	9.04885e-05	0.072212	0.000890978	0.0660308	0.00216157			0.0863389	2.86817e-05			0.144623	0.000292791													0.0908816	2.92477e-06
Bhlhe40													-0.0240902	0.0025292							0.0425563	2.3736e-08			0.0485484	0.00157401
Bicd1																																							-0.0512068	0.00957065
Bicd2													0.021328	0.00918936
Bicdl1	0.0334064	1.33969e-05	0.0301994	0.00477262	0.0423404	0.00257495							0.034434	8.13219e-11	0.0608526	9.52413e-09			0.0306839	5.11663e-06	0.0714857	2.69577e-16	0.0622869	0.00529631	0.0645074	0.000238895			0.0532986	0.000526729									0.0564456	8.30999e-10
Bid													0.0233699	0.00435903					0.0504589	0.000200104	0.0644797	0.00233421																	0.0635247	0.0013538
Bin1															-0.0612058	0.000691456			-0.111728	2.32006e-10	-0.121839	1.01727e-07	-0.220287	7.70694e-07															-0.100893	2.8368e-06
Bin2	0.0528665	0.00728891	0.0677041	0.00442049	0.0811242	1.05714e-05							0.0671122	3.97248e-11	0.0721944	0.00921569	0.0691175	0.00149164	0.111469	3.53318e-10	0.0860693	6.8466e-05																	0.068898	0.00154532
Bin3															-0.0545382	0.00944624	-0.0694963	0.000341803	-0.0774637	1.00007e-06
Birc2													-0.041171	0.00108172					-0.0701759	7.06822e-06	-0.12253	6.73124e-10	-0.120339	0.00389885															-0.083353	5.77509e-05
Birc5																			0.184159	1.03655e-05
Birc6	0.0671078	9.12279e-05			0.0592604	0.00970166							0.0596285	1.84028e-07	0.0937436	0.000668774	0.0835688	0.000386136	0.119734	8.89205e-11	0.0692237	0.00662672							0.199057	0.00141142									0.0716673	0.00380648
Blm															0.0364489	0.00950599			0.0520383	0.00144462																			0.0492223	0.00605372
Blmh			0.0608278	0.00297511									0.044617	4.57903e-05
Bloc1s1													-0.0168658	0.00821935
Bloc1s2															-0.115163	9.35757e-08			-0.111102	9.74861e-12	-0.0861507	0.000138422							-0.168615	0.00213564									-0.0998777	2.50221e-06
Bloc1s5															-0.054211	6.39438e-06	-0.0622018	5.26977e-06									-0.0797585	0.000783907											-0.0365461	0.00966
Blvra			0.0308715	0.00888405									0.0157402	0.00426167					0.0237446	0.00302169
Blvrb													-0.0432255	0.00240155	-0.073191	0.000199776	-0.0761735	0.00511024	-0.0845551	1.58643e-06																			-0.0574346	0.00881348
Blzf1	0.0134555	0.000863498											0.00564866	0.00143556
Bmi1													0.025056	0.00189041	0.048296	0.000635421	0.0458633	0.00703047	0.0561944	1.04085e-06
Bmp1																					0.0226003	0.00731258
Bms1			0.0453402	0.00546559									0.0493863	2.51671e-07	0.0964671	5.18211e-07	0.0681445	0.00230016	0.11004	7.79869e-15	0.127671	2.30511e-11	0.161516	4.20814e-05	0.118685	0.00392254			0.137181	0.00286022									0.129256	2.34546e-13
Bmt2													-0.0208752	0.00719493	-0.0377956	0.00564267	-0.0305547	0.00978414			-0.0573978	8.38593e-07																	-0.0473673	1.05093e-05
Bnip1													0.0208502	0.00186035	0.0357102	0.00545972
Bnip3	-0.0423063	0.000354305											-0.0312177	7.26931e-05					-0.0330031	0.00210657
Bnip3l	-0.0786	0.00276129			-0.088696	0.00594689							-0.0769888	1.94791e-07	-0.19517	9.71622e-16	-0.135935	6.19211e-07	-0.191223	1.34014e-27	-0.200397	1.63794e-18	-0.209757	4.52765e-07	-0.161653	0.00276013			-0.299044	6.47972e-06									-0.183977	4.75032e-17
Bod1	0.0628534	0.000632281											0.043104	2.91767e-05
Bok																					0.0362837	0.00300799																	0.0321831	0.00291397
Bola2	0.102096	9.33821e-05	0.0989485	5.25278e-05	0.104087	1.32807e-05							0.105749	4.55072e-16	0.100438	5.72219e-08	0.106545	4.47206e-05	0.0919928	1.31723e-07	0.111091	1.45643e-06	0.12266	0.00763255															0.108159	5.16669e-07
Bola3															0.0453584	0.00982567
Bop1	0.132812	6.0286e-20	0.0493704	0.00227879	0.101677	3.77173e-11							0.107349	1.65782e-38	0.153365	3.21084e-22	0.103135	3.71158e-09	0.105282	3.28345e-13	0.184973	1.40785e-23	0.200953	8.24214e-08	0.0940316	0.00321968	0.163385	6.46217e-05	0.191406	6.71644e-06									0.166499	9.8729e-22
Borcs7			0.0497526	0.00809523
Bpgm															-0.0498243	0.00307785					-0.0410969	0.00790986
Bphl	-0.0670824	2.02043e-05	-0.100736	9.25347e-08	-0.087335	1.62523e-05							-0.0830344	3.21583e-18	-0.0948444	4.63284e-08	-0.0674345	0.0015535	-0.0935456	2.10538e-12	-0.107695	2.41564e-08	-0.126674	0.00200928															-0.100361	3.36345e-08
Bpifc																					-0.0260751	7.35517e-05																	-0.0175993	0.000796955
Bptf																					-0.0695869	0.00824127																	-0.0819732	0.00122616
Brap	0.0442246	0.000161306											0.028512	0.00109641					0.039965	0.00089291
Brca2	-0.0345754	0.000699556											-0.0232806	0.000572749							-0.0750128	0.00518048
Brd1			0.095353	0.000319461									0.0588646	7.89498e-06	0.0765918	0.00166788	0.158885	5.14131e-10	0.145924	8.89886e-21	0.125248	1.94093e-10	0.126025	0.00150499															0.112845	2.45802e-07
Brd3	0.0506619	0.00915841											0.0539498	1.85671e-05	0.0932068	0.000249804			0.0659248	0.00133651	0.0817754	0.00157692							0.213966	0.00365587									0.0834621	0.00122963
Brd4	0.145123	2.82023e-12	0.13667	3.36348e-08	0.136496	8.45554e-07							0.1407	4.98601e-28	0.102561	2.39903e-05	0.101923	1.00375e-06	0.0396295	0.00456983																			0.073511	0.00442964
Brd7	0.0553261	0.0026097	0.0983665	5.84523e-06	0.0869767	0.000809713							0.0769459	4.88903e-12			0.0905597	1.09945e-05	0.0323881	0.00228233	0.107933	7.7306e-07																	0.0933957	7.82285e-05
Brd8																					-0.121765	8.07703e-08																	-0.0933052	3.70111e-06
Brf2																			-0.0156428	0.000534543
Bri3	-0.0946539	8.88075e-05	-0.0778062	0.00734833	-0.110073	6.86255e-06							-0.0973449	2.10505e-14	-0.0907465	0.000200343			-0.051575	0.00335925																			-0.0658717	0.00654917
Bri3bp	0.0668169	0.000120067	0.0556634	0.000123615	0.0840867	0.000302055							0.0755603	1.43595e-14	0.141225	6.84789e-10	0.0876849	0.000761984	0.0798338	1.19316e-05	0.111746	2.51949e-07					0.148794	0.0066901	0.189149	0.000307426									0.124928	2.43581e-08
Brix1	0.104214	5.04718e-08	0.0705616	0.00573593	0.116128	5.70216e-09							0.105889	7.5522e-22	0.23622	8.88366e-29	0.199937	1.9155e-19	0.187498	4.29611e-35	0.218627	2.13792e-28	0.207671	1.07425e-07	0.226539	6.3773e-11	0.234968	5.60698e-08	0.229461	4.16174e-06									0.227914	2.70255e-33
Brk1													0.0249068	0.0009167
Brms1													0.027389	0.00991746
Brms1l															0.0297854	0.000656036
Brpf1													0.0203445	0.00499506	0.0535763	6.03569e-06					0.0506947	0.000648891																	0.0524583	0.000142023
Brwd1	0.0699607	3.08616e-07	0.0526108	0.00615076									0.0559152	5.35216e-11	0.0736399	2.79032e-05	0.0851955	1.78359e-05	0.0654205	1.7958e-08	0.0674097	0.000202014																	0.0727954	2.5245e-05
Brwd3																	0.041407	0.00257651	0.0144719	0.00286911
Bscl2	-0.0729956	6.66435e-05											-0.0525018	1.17786e-05	-0.0657414	0.00739425	-0.0964705	9.50544e-05	-0.111858	1.17887e-11	-0.129955	4.82104e-11	-0.124158	0.00584324															-0.101609	2.11514e-07
Bsdc1																	-0.0634308	1.61816e-06	-0.0550829	9.29739e-10	-0.0666351	3.86591e-08																	-0.0465077	1.79676e-05
Bsg													0.0521224	2.36672e-05
Bsn																			0.0558634	1.13e-07	0.0702192	6.25619e-07	0.105871	0.00120795															0.0474045	0.000592322
Bst2															0.0902769	0.0044928
Btaf1	0.0389223	0.00139495											0.0365262	1.3284e-07	0.0501293	0.000546784	0.058672	3.46453e-05	0.083861	6.96679e-17																			0.0429667	0.00304751
Btbd1	0.0864287	4.03602e-06	0.0633525	0.00962123	0.0538984	0.00900601							0.0744221	4.35573e-12	0.103519	2.01093e-07	0.0628802	1.3684e-05	0.108942	3.96321e-13	0.132609	4.32996e-13	0.135383	4.08416e-05					0.132109	0.0028038									0.117926	2.50193e-10
Btbd10																	0.0412924	0.00723577			0.0433285	0.000309022
Btbd19	0.00868048	0.00348502											0.0116385	0.000580093	0.0292353	0.00685104			0.0312457	0.00296617
Btbd2	-0.0389631	0.00609095											-0.032996	0.000600951	-0.0525885	0.000269621																							-0.0475241	0.00510069
Btbd7																	0.039116	0.00395049
Btbd9			0.0572823	0.00786939									0.0293434	0.00100404					0.057711	0.00055887
Btc													-0.0185633	5.48495e-05			-0.0247377	0.000783254
Btd													-0.0188075	0.00930943					-0.0260946	0.0070289	-0.0323463	0.000638723							0.00526346	0.00245782
Btf3	0.0949827	7.03509e-15	0.0518243	0.00783667	0.0607299	0.00247375							0.073949	1.24573e-19	0.0489543	0.00133021	0.0717288	1.2198e-06	0.0510328	4.44916e-06	0.0529464	0.000320155																	0.0450181	0.00150078
Btg1	-0.146672	6.81503e-10			-0.160097	4.43873e-06							-0.13495	8.91496e-19	-0.23802	1.82997e-16	-0.122573	3.35676e-05	-0.225413	6.40602e-31	-0.12217	2.05817e-09							-0.171134	0.00719897									-0.14739	1.78971e-10
Btg2	-0.120539	1.9986e-08	-0.170653	1.07243e-06	-0.0520424	0.00804734							-0.133361	3.11585e-18	-0.319291	1.09472e-25	-0.196469	1.89311e-11	-0.299665	4.25515e-30	-0.354606	3.86346e-45	-0.326893	1.46203e-15	-0.265595	1.92148e-10	-0.320353	1.45565e-05	-0.455358	3.70063e-13									-0.359174	4.08246e-45
Btk																			0.0101906	0.00209581
Btnl9																			-0.0190044	0.00147575	-0.0323903	9.60835e-06
Bub1																			0.0665109	0.000126172
Bub3	0.093724	2.04416e-07	0.0897059	0.000673391	0.0908596	0.00282182							0.0996802	7.55473e-15	0.0879852	0.00216256	0.108637	7.64989e-05
Bud23													0.0441113	6.69062e-05	0.0941533	2.30821e-06	0.0810256	8.70692e-06	0.0741955	5.82259e-08	0.0765485	6.38866e-05	0.112834	0.00999078					0.175115	0.000268815									0.0900862	1.25852e-06
Bud31	0.0483226	0.00160666	0.0816912	0.000102035									0.0686644	5.28746e-10	0.105589	3.11516e-07	0.125967	4.58255e-08	0.0690962	4.98048e-05																			0.0590193	0.000413251
Bysl	0.122587	9.69185e-20	0.074326	7.94325e-09	0.110698	5.48249e-12							0.11273	1.21533e-48	0.193809	8.68818e-37	0.141837	4.48984e-18	0.187587	1.34617e-48	0.23679	4.82818e-44	0.258849	1.46277e-13	0.196114	8.80411e-09	0.164334	0.000152985	0.205634	1.40587e-11									0.210565	6.81837e-39
Bzw1	0.189831	7.11855e-22	0.129649	3.8388e-08	0.216634	2.4652e-18							0.183093	3.09544e-51	0.270356	1.75155e-37	0.279884	2.31591e-35	0.170532	8.88867e-27	0.182679	1.75341e-21	0.160551	3.59431e-05	0.227458	7.88405e-09	0.286413	5.49316e-12	0.199954	6.14677e-06									0.225071	6.02886e-33
Bzw2	0.0735325	1.87501e-06	0.0945514	9.40836e-06	0.136534	1.41985e-07							0.117238	4.35582e-22	0.295918	4.36046e-35	0.184828	7.47653e-18	0.175919	3.91734e-24	0.243152	3.30628e-29	0.250694	7.77837e-10	0.212078	5.89496e-06	0.228531	4.89497e-07	0.300311	2.5062e-07									0.24491	4.35072e-31
C030034L19Rik															-0.0455165	3.05215e-06	-0.0244752	0.00302536	-0.0412227	7.14155e-08	-0.117825	8.14777e-22	-0.151416	2.28434e-10	-0.0551038	0.00555515	-0.0689143	0.00679292	-0.090548	0.000725758									-0.0975181	6.66538e-21
C1d	0.0586308	0.000416881											0.0491707	5.99961e-08					0.0140389	0.000719416
C1galt1																			-0.0370602	0.00245926
C1qa																			0.0264742	0.000169496
C1qbp	0.203736	4.3858e-26	0.18724	1.00022e-17	0.212157	7.20982e-22							0.219574	3.39059e-75	0.355333	2.41889e-64	0.333349	1.70312e-51	0.241441	2.74973e-48	0.354819	1.90884e-61	0.424933	1.28212e-32	0.192325	6.05202e-08	0.292924	2.87354e-13	0.468896	1.04964e-16									0.338414	2.41121e-66
C1qtnf12	-0.0860629	1.88492e-06	-0.0408022	0.00283596									-0.0621468	2.41942e-09			-0.0658044	0.00323631
C1qtnf6																	-0.0457747	0.00771303	-0.0297384	0.000229042	-0.0241503	0.00614345																	-0.0367718	1.52731e-05
C1ra													-0.016523	0.00656029
C1rl																	-0.0462522	0.00169958																					-0.0263168	0.0016681
C230037L18Rik	-0.0226064	0.0061817	-0.0437227	0.000148444	-0.0424717	0.000118685							-0.0336221	9.09122e-12	-0.0212154	0.00743796	-0.0297314	0.000625075																					-0.0209646	0.000637275
C2cd3	-0.0328183	0.00144405											-0.022388	0.00121742					-0.0462508	0.000200547
C2cd5																					-0.0953497	3.13652e-06																	-0.0731414	0.000390543
C330007P06Rik																					-0.035541	0.0076749																	-0.040498	0.00300114
C330018D20Rik													-0.0179713	0.000550621			-0.0346515	0.00777461	-0.0294337	0.000310827	-0.0322426	0.0011475			-0.0435325	0.00778593													-0.0294506	0.00173697
C330027C09Rik																					-0.0295296	0.00364707
C530008M17Rik															0.0301843	0.0072617
C530050E15Rik															-0.0284077	0.00361849
C920006O11Rik																					-0.0226311	0.00405291																	-0.0280316	0.000377456
CAAA01118383.1			0.0548625	0.00536498									0.0356299	0.000181799			0.0354493	0.000269613
Cab39	0.0946804	6.11719e-10	0.0549053	4.8355e-05	0.0908588	9.56689e-05							0.080693	3.49098e-18	0.0760062	0.000816374	0.118396	8.89209e-08	0.0439271	0.000945704																			0.075186	0.000612935
Cab39l													0.0288829	0.00321988
Cabcoco1																					-0.0311235	0.00942876																	-0.0331302	0.00304752
Cabin1																			0.0453732	0.00945436	0.103518	1.7936e-06
Cables1	-0.0255994	2.10119e-05	-0.0451878	5.22781e-06									-0.0292931	4.20166e-12	-0.0307504	0.000819054	-0.0334179	0.0015294	-0.0270456	9.30624e-06																			-0.0240359	0.00215515
Cables2																					0.0488047	0.000109136
Cacfd1			0.00444923	0.00407751									-0.003906	0.00383453					-0.0255419	0.00281446
Cacnb2	0.0730616	3.35829e-08			0.083096	3.15847e-05							0.0609056	2.63605e-13	0.148942	6.66456e-21	0.114695	8.47979e-15	0.125451	3.14809e-33	0.18014	5.43058e-34	0.210558	5.13522e-11	0.139886	1.02394e-07	0.151654	0.00026882	0.135439	6.98001e-05									0.154719	4.80611e-27
Cactin													0.0306343	0.000271952					0.038657	0.00215365																			0.0433457	0.00300463
Cacul1													0.0163098	0.00234921
Cacybp	0.30833	9.58843e-53	0.183383	1.77724e-17	0.175064	6.03198e-14							0.239155	2.26377e-89	0.400437	2.55548e-85	0.340251	1.62416e-54	0.358087	2.14096e-109	0.449003	6.64147e-108	0.482648	6.20916e-45	0.406235	6.28836e-25	0.292624	2.10234e-13	0.487103	9.0625e-23									0.409486	5.91105e-102
Cad															0.0840355	1.64488e-08			0.0405693	0.00446659	0.0540417	0.00699764																	0.0637713	0.000386062
Calcoco1	-0.032669	0.000442286			-0.0551967	0.000281153							-0.0359116	6.00829e-08	-0.0624153	1.1208e-09	-0.0484321	0.000159208	-0.038082	1.54422e-07	-0.0760439	3.83714e-16	-0.06545	0.000354425			-0.111338	1.85714e-05	-0.0889778	5.61723e-05									-0.0761342	1.06665e-17
Calcrl													-0.0283234	0.00603628
Calhm2	-0.0358855	0.000939811			-0.0486076	6.26481e-05							-0.041656	4.33909e-11							-0.063321	0.000486272																	-0.05272	0.00221195
Calm2																	-0.0313895	0.00447213	-0.0509429	0.00516547	-0.107873	1.21509e-07							-0.141191	0.00110063									-0.0686678	0.00111439
Calr	0.0961807	8.12324e-06											0.0797317	2.50055e-10	0.144594	1.06858e-11	0.109556	1.74758e-05			0.0819931	0.000325401					0.152738	0.00139991											0.11172	6.56091e-08
Calu	0.0537715	0.000204506	-0.00921158	0.00625042									0.0251842	7.02282e-05							0.0491688	0.000886249																	0.0540983	0.00272793
Camk1													0.0275488	0.00166264
Camk2a															0.0458445	0.0012211			0.0261038	0.00499928
Camk2d													-0.0406917	0.00136959			-0.071016	0.00993467			-0.104152	1.0271e-06																	-0.0806706	0.000227403
Camkk1													0.0152088	0.00867195	0.0677298	2.649e-13	0.0370005	0.000284745			0.0533356	5.94053e-09	0.0680062	0.00574325					0.0540321	0.00262136									0.0546324	1.86561e-10
Camkk2	0.0553096	0.00338298											0.0445487	3.9102e-05			0.0742045	0.00117873	0.0324403	0.00810428
Camsap1													0.0191209	0.00692705	0.0251404	0.00881649			0.0359633	7.76475e-05
Camta1	0.0706603	9.43213e-07											0.052309	4.09471e-09	0.0728384	9.16617e-05											0.160955	0.00045668											0.0719613	0.00019055
Cand1			0.0745945	0.000559618	0.0693203	0.000717708							0.0619531	4.32755e-10	0.0860908	4.35238e-06	0.116849	8.21422e-08	0.111199	2.87773e-15	0.0668886	0.00195981																	0.0852456	1.01616e-05
Cand2			-0.0478036	0.0057701									-0.0302215	0.000258912			-0.0409695	0.00193574
Cant1																	-0.0388322	0.00589756	-0.030476	0.00119371
Canx	0.116961	5.20827e-06	0.0812121	0.00559343	0.0717717	0.000434833							0.101611	1.44786e-13	0.271556	9.58311e-32	0.208544	4.14207e-19	0.183774	2.20268e-23	0.248153	5.61107e-27	0.257637	4.68093e-11	0.183499	2.13446e-05	0.241335	1.53976e-07	0.223704	0.00106006									0.246112	9.50192e-30
Cap1																					0.0676973	0.00526718
Capg	-0.087395	0.00155534											-0.0735656	1.02412e-06	-0.170139	1.0971e-10	-0.0966764	0.00248893	-0.110592	1.08927e-09																			-0.0798829	0.00131707
Capn1													-0.00534722	0.00374224	-0.0456944	0.00164226			-0.054138	5.05895e-06
Capn15	0.033256	0.00116297											0.0379704	2.32742e-07	0.0715922	3.46671e-07	0.0628619	3.77706e-05	0.0657803	4.21361e-11	0.0785577	1.69047e-08							0.0890559	0.00721511									0.0776674	1.32935e-08
Capn2																			0.0333455	0.000135716
Capn5	-0.0297186	0.0045373											-0.0221079	0.0010809	-0.0417334	7.9684e-05																							-0.0273412	0.00343199
Caprin1	0.203864	5.02344e-18	0.180056	2.62655e-13	0.169077	1.195e-11							0.187108	5.19963e-44	0.134602	6.41705e-09	0.210655	3.68149e-21	0.196686	2.22118e-35	0.128213	2.83347e-08			0.155857	0.00325703			0.22177	0.00666009									0.150329	2.62316e-12
Caprin2													-0.011187	0.00334361	-0.0254464	0.00144899					-0.023188	0.00830802
Capza1			0.0669746	0.0035863	0.0776903	0.000973259							0.0546794	4.57581e-07
Capza2	0.0536682	6.66435e-05	0.0945004	9.19643e-05									0.0769719	1.149e-11	0.0672813	0.00280425	0.0744624	0.00867882	0.0851753	2.32974e-07	0.0769721	0.000584512			0.164483	0.000309608													0.0687438	0.0017823
Capzb													0.0388993	0.00122858					-0.0846786	5.00084e-08					-0.129515	0.003027
Car1																			-0.0643516	6.54773e-08	-0.0203759	0.00127136																	-0.029258	0.000704733
Car2	-0.0730261	0.00746565	-0.158899	9.35465e-10	-0.131841	3.01073e-05							-0.12232	6.94916e-18	-0.242332	6.4281e-21	-0.0948797	0.0016407	-0.230944	3.04708e-24	-0.181799	3.27037e-08	-0.236226	4.51929e-05			-0.198258	0.00166665											-0.217548	2.03222e-12
Car9			-0.0177957	0.000344024									-0.0162996	1.09882e-05	-0.041249	0.000271401	-0.0426763	0.000391543	-0.0497017	1.05243e-07	-0.0384312	0.000107097																	-0.0391485	0.000323771
Card19	-0.143077	5.12202e-10			-0.105255	0.000128902							-0.100888	1.73643e-13	-0.147794	1.44941e-09	-0.180925	1.16187e-12	-0.164696	6.08638e-21	-0.137421	7.49041e-10	-0.129194	0.00283338					-0.245556	7.82975e-05									-0.140556	6.07881e-11
Card6																					-0.0357125	1.64526e-08
Carf																					-0.0170633	0.000759412
Carm1													0.0332866	6.15321e-05			0.0444152	0.00763144	0.070391	9.04072e-11	0.103219	8.89007e-12							0.0954268	0.00869795									0.0781881	7.86273e-08
Carmil2													-0.019257	0.00152565					-0.0300234	0.00701072
Carnmt1	0.0726255	2.50048e-06			0.0753847	0.000373662							0.0690345	7.1533e-12	0.155308	3.61329e-13	0.115039	1.58764e-07	0.142433	5.62689e-22	0.0768543	3.00301e-06					0.128567	0.00897473	0.150944	0.00103331									0.0947597	2.55783e-07
Carns1																							-0.0514135	0.00673889															-0.0232425	0.00582692
Cars	0.214963	1.53967e-51	0.114838	6.59865e-16	0.147448	1.43146e-21							0.16477	3.11711e-94	0.224489	2.00137e-50	0.147508	1.86141e-24	0.132519	1.40557e-33	0.15215	2.41086e-22	0.104018	0.00303108	0.156537	1.06101e-08	0.229086	1.07496e-08	0.223643	1.66869e-08									0.166539	2.93157e-29
Cars2	0.0309756	0.00332704											0.0180115	0.00959462
Casc3	0.0471063	0.000200874	0.0258252	0.00956519									0.0404416	6.62972e-07	0.0271856	0.0022944
Casc4													0.0160061	0.00197081	0.0483876	0.00168652	0.0542931	0.00297954	0.0596005	1.83606e-07	0.03666	0.00635991																	0.0438018	0.00244537
Casp1			0.062411	0.00414692									0.0263972	0.00514256
Casp2															-0.0550548	0.00958885
Casp3	-0.049333	0.00706781	-0.0567166	0.0040467									-0.055616	3.11679e-07	-0.100554	2.58614e-06	-0.0612628	0.000428433
Casp4	0.0958934	2.34567e-08	0.108327	4.08755e-07	0.100023	0.000116346							0.0966581	1.99322e-17	0.0874179	3.56035e-06	0.0954787	1.403e-05	0.0572824	2.61264e-05	0.0629074	5.63773e-05																	0.0721934	7.31866e-06
Casp6	-0.0607618	1.39803e-05			-0.0697361	0.00116159							-0.0531345	3.70715e-09	-0.101441	8.15096e-09	-0.06809	0.000137328	-0.0805716	1.06528e-11			-0.0685801	0.0038075															-0.0635098	3.80236e-05
Casp8													-0.0486903	0.00031283			-0.0807436	0.00118897	-0.00978194	0.00922675
Casp8ap2													0.0328589	0.00713807	0.122918	6.82367e-08	0.11992	6.35774e-06	0.0918659	2.24138e-06	0.0915601	0.000606932	0.137957	0.00599988															0.0984885	8.98915e-05
Cast															-0.0699735	0.00206874			-0.0837994	1.72378e-08	-0.0961846	1.88889e-06	-0.144267	0.000533497															-0.0893487	3.87096e-06
Cat	-0.0941655	6.87235e-08	-0.0985894	1.12105e-05									-0.0961638	3.48863e-18	-0.149641	3.56798e-14	-0.0886826	7.6896e-05	-0.0921311	2.19923e-10	-0.0678343	0.000345871	-0.124188	0.00158995															-0.0937468	1.28188e-07
Cav2	-0.0332431	0.000166123	-0.0496451	0.000836994	-0.0561775	0.00109682							-0.0492653	2.22241e-13	-0.0578124	7.2792e-08	-0.0439621	0.000238302	-0.0250929	0.000176551	-0.0290495	2.20461e-05	-0.038261	0.00193587			-0.0611779	0.004797											-0.0332348	1.40088e-05
Cavin2	-0.0762408	1.56426e-07	-0.0805235	0.00305469	-0.0573845	0.00437123							-0.0742389	7.78747e-15			-0.0520304	0.000171852
Cavin3	-0.100685	2.3545e-06											-0.0784457	5.13233e-10	-0.072632	0.000707031	-0.0837986	0.00266555	-0.0455412	0.00516547																			-0.0421546	0.00633964
Cbfa2t3	0.137176	5.27454e-10	0.176679	1.17699e-13	0.156448	7.27154e-08							0.148976	6.07554e-30	0.103028	0.000119757			0.146008	3.90067e-15	0.105043	5.42113e-05																	0.0924547	0.000319129
Cbfb	0.105416	4.34186e-10											0.0765055	1.12718e-13	0.156241	6.49121e-18	0.165571	3.46247e-12	0.137674	2.97642e-16	0.200338	4.7126e-21	0.218403	2.22835e-08	0.189906	9.50164e-06													0.17573	5.43872e-18
Cblb															-0.0539972	8.49052e-07																							-0.0345678	0.00190387
Cbr1	-0.11741	1.35327e-09	-0.0945252	0.000199507	-0.0937713	0.000615082							-0.106413	4.80333e-19	-0.135109	1.44597e-10	-0.0971496	0.000120896	-0.0896225	2.15665e-08	-0.105655	1.19741e-07																	-0.0878901	4.0241e-06
Cbr4																			-0.0323688	0.00181518	-0.0549528	1.62425e-05	-0.0848747	0.00159195															-0.0537761	1.61597e-05
Cbx1															0.0750246	0.000494516	0.0691746	0.00544513	0.0841745	1.51615e-07
Cbx3															0.107889	3.64351e-05			0.0710196	0.000129761	0.0842567	0.000280767																	0.0996028	4.43609e-06
Cbx4													-0.0232886	0.00792663
Cbx5															0.0540591	0.00684259	-0.00988942	0.000747434
Cbx6																			0.0477386	0.000403668	0.045444	0.0053841																	0.0558838	0.00291618
Cbx7			-0.0453784	0.00412804									-0.0371359	2.05857e-06
Cby1	-0.040867	1.18203e-06			-0.0429023	0.0040835							-0.038694	5.64322e-12	-0.0842857	7.67802e-10	-0.0518633	0.00475453	-0.0696137	5.74875e-08	-0.0998842	2.01858e-10	-0.108089	0.000269427					-0.135344	0.00132269									-0.0887423	8.57487e-09
Cc2d2a	-0.0254138	0.000259471											-0.0204334	7.71785e-06
Ccar1	0.158499	8.00409e-15	0.162502	6.10885e-11	0.0977454	0.00167651							0.144855	1.80428e-28	0.108222	0.000182695	0.163576	9.77769e-11	0.0940281	5.86486e-07																			0.0770969	0.00328723
Ccdc102a																			0.016198	0.00889177
Ccdc107													-0.0344447	0.0094367
Ccdc112	0.0838322	9.41179e-06	0.0714525	0.00645048									0.0683492	5.7638e-09	0.0268804	0.00691994	0.0678001	0.000379198	0.0608168	4.68967e-09
Ccdc114																					-0.0312597	0.000169321																	-0.026937	0.00131841
Ccdc115	0.169426	1.21828e-20	0.0952553	5.83356e-09	0.171029	3.20588e-14							0.15702	1.63943e-48	0.262244	3.58224e-37	0.208289	2.74789e-22	0.216653	1.11553e-41	0.203214	3.92169e-26	0.255276	1.75561e-10	0.185763	1.08176e-05	0.220262	1.38295e-08	0.275193	2.1054e-09									0.231736	1.43876e-33
Ccdc117																			-0.0194937	0.0010601
Ccdc12													0.0332458	0.000132699	0.0959313	0.000129994
Ccdc122	-0.0473437	4.45972e-06	-0.050193	0.0051039	-0.0530199	0.00575159							-0.0515255	1.47133e-12	-0.0497283	0.00108549	-0.0630047	7.39675e-05	-0.0487314	4.70936e-07	-0.0459421	0.000755656																	-0.0444555	0.000513232
Ccdc124	0.0889956	7.91695e-08	0.049856	0.000909693									0.0721622	6.63232e-15	0.0474551	2.98442e-05	0.108541	1.84602e-08			0.0687201	0.000373156			0.0728261	0.00639624													0.0762329	1.48661e-05
Ccdc125	-0.0332206	0.000187131	-0.035198	0.00917999	-0.0365762	0.00516368							-0.0349769	1.94003e-10	-0.0706513	4.30872e-07					-0.0519525	9.90228e-05					-0.113857	9.41102e-05	-0.0798345	0.00962997									-0.0627047	2.75504e-07
Ccdc127															0.0616639	0.00200139	0.0795462	1.35206e-06			0.0474791	0.00900254																	0.0533518	0.00315506
Ccdc134	0.039346	0.000241568											0.0245503	3.33259e-05	0.0401834	0.00187373			0.0431167	1.21434e-06	0.0524328	8.42201e-05																	0.0450156	0.000232668
Ccdc137													0.0275846	1.32202e-05			0.0347143	0.00235505	0.0475114	2.32963e-08	0.0444131	0.001195																	0.0452364	0.000158753
Ccdc138																			-0.0259188	0.00149987
Ccdc15					-0.035858	0.00129202							-0.0166406	0.000203865
Ccdc163																			-0.0252077	0.00342918																			-0.034822	0.00668974
Ccdc166															0.0196376	0.00569018
Ccdc167																					-0.00805386	0.00514056																	-0.0142318	0.00233815
Ccdc171													-0.0184341	0.00546545
Ccdc173	-0.0214133	0.00825216	-0.032364	0.00361782									-0.0239481	8.33531e-07	-0.0589308	1.05829e-10			-0.0246926	0.000463281	-0.0266631	0.00219383	-0.0618791	0.00178394															-0.0292897	0.000713706
Ccdc174																			-0.0375184	0.00698159
Ccdc18	-0.0325893	3.86199e-06											-0.0254928	9.34629e-08	-0.0411335	0.00289314	-0.0425076	0.00892131			-0.0840451	1.64526e-08							-0.222873	0.000188764									-0.0767553	2.06429e-08
Ccdc181													-0.0261318	0.00105425					-0.0360716	0.00120841
Ccdc191	-0.0355433	0.00195951			-0.0513048	0.00641102							-0.0413253	8.76214e-08			-0.0486546	0.00966932	-0.0585195	3.84999e-08	-0.0689989	1.07739e-05			-0.105018	6.52177e-06													-0.0503399	0.00143597
Ccdc22																			0.00761674	0.00710153
Ccdc25	0.0520067	0.000415074											0.0386884	1.53358e-05	0.0868282	1.71122e-08	0.112053	1.28298e-09	0.0869283	1.64108e-11	0.102846	3.1465e-09	0.126687	0.000474797	0.142098	2.61431e-05			0.125505	0.00705396									0.106419	3.93676e-11
Ccdc28a	-0.0537787	1.69595e-06	-0.0391432	0.00531498	-0.0654378	0.000407361							-0.0553058	5.91444e-14	-0.0777538	2.01078e-09	-0.0727109	1.59707e-08	-0.0663188	8.41032e-13	-0.0477993	1.94698e-05					-0.106223	0.000130002	-0.0833903	0.00104704									-0.0671462	9.10016e-11
Ccdc28b	-0.0430069	0.00206328	-0.0597914	0.00445191									-0.0541607	2.92654e-09	-0.0815356	4.74097e-06	-0.0906333	9.67633e-06	-0.0820444	1.5495e-08	-0.146717	5.27062e-17	-0.154582	2.62612e-05	-0.0959034	0.00324251	-0.125282	0.00294181	-0.150346	0.000881297									-0.135611	6.82289e-17
Ccdc32																											-0.0930174	0.00231449
Ccdc34	-0.0494997	0.0040768											-0.0306963	0.00609296	-0.065859	0.00792704					-0.188466	2.6595e-12	-0.137276	0.00122359	-0.158391	0.00549189			-0.163015	0.00366557									-0.158304	3.75324e-09
Ccdc47																	0.0906806	0.000865274
Ccdc50													0.0310978	0.00720798
Ccdc51																					0.0101188	0.0036158
Ccdc58															0.0145523	0.00476601			0.0555025	5.32606e-05
Ccdc59																					0.0700221	0.000643377
Ccdc6																					0.0450698	0.00293864
Ccdc61	-0.032301	0.00350027											-0.0200425	0.0013106	-0.0481502	0.00106067					-0.0888096	1.72924e-11							-0.135423	0.000330285									-0.0747253	3.14035e-10
Ccdc66																			0.0457586	4.93611e-05
Ccdc69													-0.0461612	2.20374e-05					0.0242533	0.00292789
Ccdc73	-0.0216789	0.000715314											-0.0210103	9.74228e-07
Ccdc77																					-0.0499006	0.00722497
Ccdc82															-0.0323328	0.00223099					-0.0566976	0.000627528																	-0.0468358	0.00585802
Ccdc84			0.0408866	0.00317828									0.0225713	3.60924e-05
Ccdc85b																			0.0333862	0.000103197
Ccdc86	0.143343	1.21714e-15	0.110069	2.27104e-11	0.123245	1.27499e-07							0.133021	2.01015e-36	0.207567	1.03197e-22	0.176676	1.36819e-16	0.212149	6.51368e-44	0.285032	4.58659e-43	0.221771	1.07422e-07	0.225771	6.01396e-11	0.171504	0.000564737	0.381957	3.5705e-19									0.242637	6.31043e-35
Ccdc88a	-0.0747344	0.000111205											-0.0558269	1.07302e-05	-0.0783785	0.00290756	-0.0945604	0.00126783	-0.0601352	0.000500161	-0.138103	2.75936e-09							-0.189894	0.00422918									-0.13288	4.68349e-09
Ccdc88c															0.0578022	0.00123646			0.0356101	0.00151363
Ccdc9	0.0590797	0.000432952			0.0912789	3.85609e-05							0.0551185	1.46265e-08					0.047049	0.00136739																			0.0679268	0.000205717
Ccdc90b	-0.0442181	0.00450378											-0.0468456	2.31984e-06	-0.0630873	0.00195971			-0.0395549	0.00695931	-0.0936245	9.64224e-08	-0.113249	0.00214507															-0.0910236	2.25758e-07
Ccdc91	-0.0708402	6.39303e-07	-0.0587606	0.000789845									-0.0598609	5.16883e-11
Ccdc97																			-0.0388667	0.000154594	-0.0429925	0.000145389
Cchcr1																					-0.0461482	1.69373e-05																	-0.0392533	0.000101095
Ccl27a													-0.0297799	0.00204259							-0.0321439	0.00335105							-0.0568474	0.00994258									-0.0369181	0.00113004
Ccl3															-0.189939	3.6603e-10			-0.0836597	2.78939e-06	-0.161591	4.28967e-14	-0.25865	9.22537e-11					-0.0899809	0.00452068									-0.15933	1.74485e-13
Ccl4	-0.106466	4.86086e-08	-0.202491	3.80316e-17	-0.247544	1.03408e-16							-0.185633	2.38261e-45	-0.249046	2.15267e-22	-0.129767	2.11788e-10	-0.0945248	5.3383e-08	-0.136126	3.54564e-12	-0.192918	2.40181e-06	-0.172394	0.00012516	-0.150195	0.0026359											-0.176674	1.83904e-17
Ccl5																									-0.012821	0.0010824
Ccl9																					-0.0750416	0.000262494																	-0.0472799	0.00404994
Ccm2			-0.0714848	3.95033e-05									-0.0425366	0.000181897			-0.0980949	7.61769e-06	-0.049717	0.00191908	-0.0884954	8.37948e-06							-0.117498	0.00434702									-0.0787591	1.57166e-05
Ccm2l	-0.0325838	0.00184323											-0.0275152	8.0244e-05
Ccna2																			0.115701	0.00018639
Ccnb2																			-0.0627934	0.00477635	-0.124152	0.000393994							-0.296902	0.000184993									-0.0832529	0.004579
Ccnd1	-0.110067	1.13318e-07			-0.0892907	9.87506e-05							-0.0647536	5.69187e-08	0.0625477	0.00304834					0.0706681	0.00270641																	0.0713646	0.000762216
Ccnd2																			0.0939001	6.94442e-05	0.202433	1.48985e-13	0.16013	0.000763727					0.269827	0.00145904									0.131672	1.69406e-06
Ccnd3	0.14705	3.26698e-12	0.127175	3.17313e-07	0.0898007	0.000689354							0.12269	2.22036e-23	0.15668	1.81225e-11	0.184578	1.03223e-14	0.217288	5.37635e-37	0.229542	5.07624e-27	0.203934	9.19821e-06	0.2178	2.32022e-07			0.256182	2.70154e-08									0.190472	2.91755e-21
Ccndbp1					-0.0666756	0.00843649							-0.0401065	0.00111749	-0.0854896	8.44902e-05	-0.0701915	0.00355483	-0.0976062	8.2015e-13	-0.117228	5.17994e-11	-0.131416	0.000649303															-0.0916485	9.36688e-07
Ccne1																	0.0339598	0.000348573
Ccne2																	0.0338015	0.00738006
Ccng2	-0.0341896	1.83859e-05	-0.0423196	0.00418477	-0.0606454	0.000206319							-0.0472813	1.27615e-14	-0.137202	6.207e-26	-0.0753523	3.14322e-07	-0.127768	2.77815e-42	-0.154264	2.86111e-30	-0.0710834	2.56403e-05	-0.0533517	6.21625e-07	-0.102912	5.81217e-05	-0.33578	4.40888e-14									-0.138924	8.25877e-31
Ccni																			-0.0907763	2.32997e-06	-0.10273	1.34998e-05			-0.144749	0.000916266													-0.0909979	0.000133137
Ccnj																																							0.0230737	0.00194688
Ccnl1	-0.0911454	4.10168e-05			-0.145655	1.03422e-06							-0.0919811	2.18549e-11	-0.108665	0.000226663	-0.0929658	0.0019763	-0.107975	4.60523e-07							-0.197064	7.78949e-05
Ccnl2			0.0640145	0.0056428											0.0470258	1.31042e-05			0.065608	0.000592022	0.0950315	6.23526e-05							0.187531	0.0054779									0.0877544	8.35058e-05
Ccnt1	-0.104088	9.29892e-06			-0.254031	7.94139e-17							-0.116212	1.88137e-18	-0.111684	4.75081e-06			-0.0372872	0.00168834
Ccnt2																	0.0620081	0.00504819
Ccny																					0.0567449	0.00169919																	0.0546891	0.00149922
Ccpg1													-0.0264758	0.00127578	-0.0790758	2.57232e-08	-0.0533044	0.000135404	-0.053997	5.49294e-10																			-0.040843	0.000505776
Ccpg1os			-0.0448856	2.17736e-05									-0.0289312	6.22162e-07	-0.0342369	0.00395821			-0.0230798	0.000679027																			-0.0302003	0.00576566
Ccrl2	-0.033799	0.00686455	-0.0516381	0.00146301									-0.049693	6.30353e-09	-0.0691948	7.19205e-07	-0.0482865	0.000572199	-0.0451834	2.64385e-05																			-0.0302909	0.00834587
Ccs			-0.0463842	0.000380881															-0.0416591	0.00594383
Cct2	0.135362	2.57642e-10	0.118779	1.11085e-07	0.120358	4.66147e-06							0.130179	7.29372e-28	0.182668	4.59568e-24	0.217564	1.0165e-26	0.110026	4.68735e-15	0.132177	1.07977e-12	0.131752	0.000659529	0.107204	0.00609755	0.200202	7.14173e-07	0.187254	5.00036e-05									0.15518	1.94046e-19
Cct3	0.263932	2.61875e-42	0.197628	4.59816e-21	0.265691	5.9269e-30							0.251273	6.14984e-101	0.376577	2.09326e-75	0.255597	1.38789e-33	0.202279	1.25548e-41	0.250884	2.68432e-38	0.293297	2.60936e-19	0.139875	0.000272361	0.247957	3.35288e-11	0.343347	7.06357e-14									0.25327	5.05779e-46
Cct4	0.0673479	7.59839e-06											0.0470935	0.000107212	0.0804994	0.000202654	0.0916959	1.21502e-06	0.116574	5.90488e-15	0.095964	3.41896e-06			0.118252	0.00512456			0.183066	6.4451e-05									0.0989416	2.42429e-07
Cct5	0.261484	6.22329e-40	0.117479	1.67627e-07	0.212915	8.05148e-20							0.201528	4.34156e-70	0.210156	4.24789e-32	0.156316	4.50951e-15	0.101379	1.0454e-11	0.171763	6.40953e-22	0.218835	6.09329e-10			0.174445	3.64894e-05	0.189812	2.49317e-06									0.173252	2.02168e-24
Cct7	0.1037	2.69019e-09	0.114392	4.00284e-07	0.0852694	0.00676929							0.1127	7.23132e-22	0.16714	3.59053e-17	0.133949	5.69181e-11	0.0921198	3.52041e-09	0.163279	2.0659e-17	0.189382	1.5606e-07	0.152853	9.80846e-05	0.143838	0.00102213	0.143223	0.00340893									0.154492	8.09955e-18
Cct8	0.192756	1.0657e-24	0.136288	2.27273e-09	0.227836	3.08957e-21							0.195994	1.49425e-62	0.248882	2.40752e-41	0.242364	8.7588e-34	0.160179	3.05655e-28	0.253769	2.67462e-43	0.290771	3.62659e-19	0.213375	8.69261e-12	0.249544	7.53916e-11	0.209831	3.68119e-05									0.246064	1.69483e-46
Ccz1															0.0765712	0.000847068
Cd151																			-0.0337326	0.00311544
Cd180																			-0.0485299	2.68383e-08	-0.0493323	0.00188126																	-0.0347878	0.00665766
Cd1d1	-0.0493246	0.000780171	-0.0716132	4.55728e-05									-0.0600582	2.2592e-11	-0.0800729	6.00788e-05			-0.0569609	3.5013e-05	-0.0559418	0.00471607																	-0.0652657	0.000522907
Cd200													-0.022492	2.68658e-05	-0.0371112	1.02658e-05					-0.0314644	9.83765e-05																	-0.0300414	0.000182391
Cd200r1					-0.05121	0.00503202							-0.0248196	0.003011	-0.0639236	3.09636e-06																							-0.0376493	0.00122963
Cd244															0.0809157	6.01669e-13			0.0995583	7.25246e-19	0.0856589	3.64702e-05	0.141398	0.00141209															0.0870734	1.09666e-06
Cd24a	-0.164197	2.42169e-10	-0.121175	5.42818e-05	-0.202843	2.54428e-11							-0.164025	4.16019e-28	-0.227577	2.61558e-18	-0.16527	1.6684e-08	-0.100475	2.26744e-11	-0.119674	4.40027e-06					-0.196895	0.000134187	-0.230308	0.00173696									-0.161315	4.55849e-11
Cd27	-0.186446	2.59195e-19	-0.147462	4.09602e-08	-0.157261	7.82261e-08							-0.167407	2.44707e-36	-0.275342	1.48788e-27	-0.194254	2.97118e-11	-0.119632	2.10072e-09	-0.266118	6.22743e-28	-0.24197	2.61486e-08	-0.25171	1.42408e-07			-0.385112	3.5755e-08									-0.232923	6.81503e-23
Cd2ap	0.0409995	0.00085088	0.0747621	0.00110801									0.0460405	2.24987e-06	0.0462074	0.00104667	0.0667124	0.000376292	0.061971	3.3584e-08	0.0577188	0.00358789																	0.0603984	0.000487575
Cd2bp2	0.0437756	0.00141451			0.0556411	0.00363374							0.0405816	1.67162e-06	0.0492538	0.00168433	0.0623786	0.00607763	0.0589176	9.47224e-09																			0.0625146	0.000946213
Cd300a	-0.0719054	2.696e-10	-0.072775	2.11829e-05	-0.10266	4.88758e-10							-0.0808479	1.09626e-26	-0.122568	7.05281e-14	-0.115015	2.09756e-11	-0.0984798	3.21718e-21	-0.0769437	1.48776e-06					-0.171228	1.52704e-05											-0.0998357	8.42496e-12
Cd320													0.000717866	0.00675295					0.0336132	0.000640367	0.0993743	1.69701e-07	0.149362	0.000100306															0.0761858	5.5414e-05
Cd34															-0.124453	5.32607e-08					-0.132657	9.42845e-11	-0.154032	0.000317798															-0.115963	1.72679e-06
Cd37															-0.154598	6.97257e-09	-0.0936152	0.00136239	-0.0817806	5.49466e-05	-0.107534	2.38484e-05	-0.161338	0.000635344			-0.15562	0.00716756											-0.11497	6.92315e-06
Cd3eap	0.0950783	7.57345e-09	0.0869629	4.19296e-05	0.126137	2.84267e-09							0.105698	1.98303e-24	0.17097	5.24021e-16	0.176821	5.94764e-17	0.186059	6.93054e-35	0.282898	6.68846e-38	0.292001	4.40623e-12	0.226739	1.90013e-06			0.22491	3.92864e-10									0.227764	2.91524e-28
Cd44			-0.0532297	0.00678609									-0.0321989	0.00276761
Cd47	-0.102232	0.000337767	-0.106085	4.64425e-06	-0.105655	0.000199306							-0.104315	9.43282e-16	-0.0786914	0.000237624	-0.121118	1.92304e-07	-0.09789	3.50758e-11	-0.101685	1.04332e-06	-0.154817	0.000136603															-0.0920049	7.41579e-06
Cd48															0.0943045	1.73137e-11	0.0424254	0.000208356	0.172714	1.72048e-18	0.146019	3.54532e-09			0.15182	0.000400139			0.224245	0.0011088									0.15105	1.62152e-08
Cd53	0.131122	6.81204e-43	0.103838	7.50536e-27	0.115128	2.56764e-18							0.114031	3.03857e-90	0.401491	3.49443e-59	0.211683	1.11034e-48	0.366723	6.12846e-80	0.225229	3.06268e-19	0.263824	4.35358e-09	0.201636	0.0003228	0.328487	1.21319e-08	0.358039	3.46048e-07									0.277617	3.0874e-28
Cd55	-0.0404985	0.00104372											-0.0391383	2.39496e-06	-0.0292583	0.00123693	-0.0453043	0.00212532	-0.0578721	2.76753e-10																			-0.0232945	0.00163237
Cd59a			-0.0413238	0.00869481									-0.0284219	2.92941e-05
Cd63	0.183706	3.03699e-25	0.119574	2.01233e-09	0.182466	9.10881e-16							0.162768	1.37502e-51	0.213781	1.44651e-22	0.154472	1.90796e-10	0.116041	1.16212e-05	0.135445	0.000135813	0.184085	0.0033035			0.229507	5.06947e-07											0.16421	1.49055e-07
Cd69															-0.0960227	0.000227729			-0.21838	1.74714e-17	-0.237375	1.77456e-12	-0.234973	6.50652e-05					-0.222239	0.00839303									-0.171097	8.18957e-09
Cd72	-0.0528473	9.27974e-07	-0.0422775	0.000399171									-0.0470221	2.89678e-13	-0.124946	2.58781e-10	-0.074865	4.56272e-05	-0.103995	7.97863e-14	-0.148293	2.74626e-14	-0.216348	8.2046e-09			-0.135061	0.00211645											-0.140127	3.60315e-15
Cd74															0.0778984	0.0041625
Cd79b	-0.0671946	2.55902e-05	-0.0716382	0.00192725	-0.0851391	0.000187453							-0.079379	5.39725e-15			-0.101729	4.04637e-07	-0.0943547	3.53301e-13	-0.129268	4.46924e-13	-0.148859	5.211e-05	-0.106612	0.00411872													-0.0949912	6.48552e-08
Cd81	-0.12018	1.07981e-09	-0.0775591	0.00109314	-0.0778661	0.00173333							-0.0969715	3.50491e-17	-0.159953	3.46943e-14	-0.17003	3.54972e-15	-0.156695	5.94559e-24	-0.137806	7.56307e-12	-0.181975	2.99004e-06	-0.145582	0.00285051			-0.187485	0.00519101									-0.136339	2.02697e-12
Cd82			-0.0617687	0.00678609									-0.0445687	7.18469e-05	-0.0789327	6.96481e-05					-0.0583295	0.000232266																	-0.0603436	0.000714914
Cd84													-0.0570622	1.92624e-05	-0.118633	7.63751e-09	-0.0878481	0.000207059	-0.0705338	7.90746e-07	-0.153693	6.83839e-17	-0.188819	4.11709e-07	-0.13505	6.37879e-05													-0.126009	7.35781e-12
Cd86					-0.0306907	0.00727103
Cd9	-0.194374	4.63023e-17	-0.129681	7.74118e-07	-0.129956	3.43784e-05							-0.15781	1.42035e-29	-0.14993	1.08667e-08	-0.182402	4.94747e-11	-0.142574	6.44798e-10	-0.14863	1.73892e-12	-0.142353	0.00010262	-0.128174	0.00113465			-0.203922	0.00386953									-0.157974	1.1727e-12
Cd93	-0.121674	7.84735e-14	-0.0800551	0.00129833	-0.0913588	5.5968e-05							-0.103928	2.64451e-22	-0.250789	2.61836e-32	-0.206316	3.1322e-18	-0.163047	1.87553e-20	-0.312252	4.13451e-37	-0.310082	1.74091e-13	-0.210461	8.88376e-07	-0.211433	8.80972e-06	-0.350879	1.82764e-07									-0.277173	1.39476e-34
Cd96															-0.0363402	0.000992185			-0.0334007	8.32903e-06	-0.0571884	7.58667e-06																	-0.0490859	5.439e-06
Cd99l2	-0.037656	0.00168781											-0.0242167	0.00207881	-0.0427385	0.000996175	-0.0444092	0.002629			-0.03513	0.000904031																	-0.0379901	0.000320605
Cdc14a							0.0267634	0.000694548					-0.0242268	0.000341176					-0.0490442	1.53652e-06	-0.0359867	0.00895205
Cdc16	0.056238	0.00475743											0.0505118	2.92734e-06	0.0770073	1.81956e-05																							0.054191	0.00454739
Cdc23			0.0206395	0.00321319									0.009762	0.000498784
Cdc25a	0.0656334	5.36301e-07	0.0527059	0.000309611	0.0426732	0.00607793							0.0570301	6.26503e-14	0.115991	2.31232e-13	0.15166	1.43896e-14	0.111572	3.3829e-13	0.140196	5.21313e-13	0.167193	3.21897e-05			0.124734	0.000134831	0.156914	0.000288597									0.147183	8.43707e-17
Cdc25c																																							-0.0222598	0.00972451
Cdc26	0.0708424	0.00330604											0.0439363	0.000290311			0.09664	4.07601e-07			0.0564992	0.00969867
Cdc34	0.101685	8.22454e-13	0.0954632	1.34613e-08	0.114	8.61368e-10							0.108011	6.29768e-34	0.123853	2.43193e-14	0.147935	7.01261e-17	0.12204	1.33833e-17	0.145324	3.00028e-13	0.149465	0.000150722	0.16131	0.000172131			0.132813	0.00987971									0.141152	6.14281e-15
Cdc37l1	0.0846272	1.80897e-06	0.0689837	0.00754258	0.0911023	0.00019791							0.083309	3.87691e-14	0.0817925	9.72363e-08	0.074085	0.00482717	0.0921954	2.14346e-08																			0.0631507	0.00252402
Cdc40															-0.0852187	0.000615988					-0.0985619	3.71369e-05							-0.211919	0.00230186									-0.094872	6.1304e-05
Cdc42	0.115998	1.06197e-08	0.107035	1.32267e-06	0.0768414	0.00631002							0.104609	6.3795e-20			0.0765399	0.000546622																					0.0569991	0.00422852
Cdc42bpa													-0.0301129	0.00185012
Cdc42ep3	-0.0938609	1.72706e-06	-0.116632	7.74118e-07	-0.112527	1.22955e-05							-0.10695	2.26449e-19	-0.167227	8.91717e-13	-0.150967	2.25599e-09	-0.158729	2.79289e-21	-0.221147	1.2289e-24	-0.231661	3.50331e-08	-0.168226	2.44346e-06	-0.155261	0.00110828											-0.191681	7.78857e-21
Cdc42ep4													-0.0197354	0.000598385					-0.0204938	0.00314424
Cdc42se1	0.0352199	0.0001803											0.0413578	1.02412e-06
Cdc42se2			-0.0679922	0.000982249									-0.0531044	1.12404e-06
Cdc5l			0.0924446	0.000300539									0.0520994	0.000115384
Cdc6																	0.0458164	0.00568217			0.0626202	0.00279903																	0.0492874	0.00717238
Cdc73													0.0378262	0.000113318	0.0616672	0.00259082	0.0747306	0.000400982	0.0605929	0.000220224	0.0472506	0.00832587
Cdca3																			-0.00768137	0.00530289	-0.125386	9.30233e-06							-0.20362	0.00141142									-0.057435	0.00284472
Cdca4																			0.0586753	0.00105734
Cdca7	0.0704093	0.00888547	0.0673582	0.00709731	0.114721	1.20386e-06							0.0961709	1.46014e-12	0.263671	5.12088e-23	0.172034	1.15945e-08	0.173899	1.26622e-18	0.232913	1.14022e-22	0.229487	8.83533e-11			0.223583	5.24348e-06	0.250497	1.57211e-05									0.242423	9.62238e-24
Cdca7l			-0.0841405	9.18696e-05									-0.0577554	1.26935e-06
Cdca8																			0.128446	0.000595344
Cdipt					0.0816412	0.000413628							0.0562723	8.65268e-08
Cdk1													-0.0209303	0.00278033					0.110353	2.31681e-06	-0.116207	0.009995
Cdk11b					-0.152432	9.68196e-06							-0.0756667	5.37534e-07	0.0338816	0.00139256					0.0821329	0.000735967
Cdk12	0.101399	4.87535e-08											0.0720387	1.00119e-09	0.0976208	4.7711e-07	0.133286	2.74036e-08	0.102444	9.32316e-10	0.0826515	0.000889092							0.162217	0.0092111									0.0958359	1.2358e-05
Cdk13	0.0730985	1.59269e-05	0.0544206	0.00971604	0.0741345	0.000533099							0.0675588	2.7559e-12	0.0523104	0.000184314	0.0850071	6.30261e-05	0.0894508	4.36895e-08	0.0838912	0.000137211							0.166369	0.00145904									0.0629804	0.00168102
Cdk16	0.0661708	4.57311e-07											0.0415819	3.70043e-07			0.0379121	0.00687961
Cdk17																	0.0727933	0.00687961
Cdk18	0.0350837	0.000858405											0.0213835	0.00380884
Cdk19	-0.0522827	7.19379e-06											-0.0520623	3.54408e-11	-0.102096	1.45327e-11			-0.050613	0.000108161	-0.12806	1.62663e-11	-0.134883	0.000177179	-0.0963875	0.0018324													-0.114723	7.02205e-12
Cdk2																			-0.0479428	0.0041372
Cdk2ap1			0.0625314	0.00972632	0.0744074	0.00317349							0.0623971	2.29462e-07	0.103345	7.24615e-06
Cdk2ap2	0.0986908	1.19277e-06	0.0670138	0.000202057									0.0710784	2.3913e-12	0.0767247	1.43709e-05	0.0664668	2.68041e-05																					0.0469708	0.00294193
Cdk4					0.097143	0.000534024							0.0606499	7.64514e-07	0.140495	4.97037e-11	0.0703082	0.0078418
Cdk5	-0.0299121	0.00210806											-0.025963	0.000187591	-0.0380269	0.000996287			-0.0405511	3.95452e-06
Cdk5rap1															0.0296965	0.00223111
Cdk5rap3													0.0119805	0.00274707
Cdk6	0.162654	2.88143e-22			0.076604	8.89265e-05							0.114963	8.82314e-34	0.325247	2.9617e-34	0.331482	2.00707e-25	0.11636	2.01876e-08	0.205109	1.7509e-16	0.25014	3.12382e-07	0.222024	0.000142615	0.289767	3.33757e-07	0.235497	0.00537921									0.237391	1.08186e-21
Cdk7													0.0435345	2.45237e-05			0.0625879	0.00491194			0.0552795	0.000202384																	0.0538691	0.00163416
Cdk8	0.0512036	0.00373711											0.04111	5.64168e-05	0.0773598	4.1967e-07	0.0778108	3.50614e-05	0.067794	1.4056e-07	0.104415	1.94902e-08	0.118046	0.00295629															0.0909712	3.15097e-07
Cdk9			0.0699412	0.000190869									0.0360598	0.000423849	0.0538429	0.000399749	0.101758	3.70665e-07	0.0523703	0.000903316	0.0737126	0.00457634																	0.0635647	0.00626552
Cdkn1a					-0.110937	0.00162145							-0.0438361	0.000457226							0.081702	7.99284e-10			0.0796757	0.00515312													0.0369577	0.00362792
Cdkn1b													-0.0354803	0.00168852	-0.0820596	0.000357449			-0.0789269	2.03877e-06	-0.173656	7.26057e-19	-0.132982	0.000641688	-0.103969	0.000307257			-0.219089	0.000539219									-0.133361	2.93671e-12
Cdkn1c	-0.130523	1.25602e-08	-0.17194	3.56509e-10	-0.146384	2.49117e-06							-0.163839	4.41842e-31	-0.0904254	2.37861e-08	-0.102916	2.21381e-05	-0.0295379	0.00483035
Cdkn2aip	-0.0523761	0.000946637	-0.0574121	0.00194235	-0.0969534	1.38494e-05							-0.0648182	6.04122e-12	-0.0919793	3.25417e-06	-0.0913303	2.28156e-06	-0.104202	5.93704e-14
Cdkn2c																					-0.0708753	3.18256e-05																	-0.061983	6.08792e-05
Cdkn2d	-0.0713141	0.000285537			-0.0791494	0.00680119							-0.0544352	1.08532e-06			-0.0882796	0.000481054	-0.0950837	1.09226e-06	-0.0698614	0.00192408							-0.24161	0.00109931									-0.0812108	0.000691687
Cdkn3																					-0.0517996	0.000120116							-0.252906	0.00169024									-0.0420827	0.00291166
Cdt1																			-0.0180321	0.00117554					-0.158564	0.00324641
Cdv3	0.300515	1.48802e-42	0.18145	7.22722e-17	0.249702	2.37469e-24							0.258215	3.30543e-92	0.447774	1.94309e-98	0.407988	4.56727e-71	0.425474	7.32444e-140	0.409925	2.40237e-81	0.411977	1.42079e-24	0.413123	9.88353e-23	0.331537	2.68736e-15	0.440018	3.15774e-22									0.410736	1.43124e-89
Cdyl																	0.0455081	0.00299647	0.0404779	5.27097e-05
Cebpb	0.121927	0.000153195	0.102955	0.00203659									0.0884013	4.34993e-06	0.118224	3.99427e-06			0.0671874	0.00495331	0.421334	7.41578e-56	0.380982	9.70141e-17	0.37277	4.27057e-14			0.223847	0.00117813									0.284572	2.32319e-26
Cebpd	0.0339522	0.000525174	0.0579902	6.07724e-05									0.0309317	5.74433e-06	0.044173	0.00100127			0.0235612	2.82236e-05	0.0550505	4.08434e-05																	0.0563709	2.38048e-06
Cebpg	0.0712784	7.49777e-09											0.0481334	7.32967e-08	0.0803578	4.569e-05	0.079328	0.000484272																					0.0617228	0.00952097
Cebpz	0.157169	2.9356e-13	0.0816494	0.000547821	0.0957846	0.00530435							0.121517	3.09105e-20	0.236035	3.51262e-24	0.242126	4.62725e-26	0.214399	2.77514e-33	0.234705	4.94091e-26	0.209083	1.0864e-06	0.186507	8.00678e-05	0.148989	0.000583263	0.36574	4.99269e-13									0.206479	1.26833e-23
Cebpzos	-0.0609203	0.000387912											-0.0491141	6.90249e-06	-0.0616147	0.00190077																							-0.0572488	0.000128769
Cela1															-0.0451976	0.00869144			-0.0497044	2.15509e-05
Celf1			0.0713586	0.00176913									0.0548769	7.39249e-07	0.0820013	0.000886172			0.0164968	0.00627438
Celf2	-0.158236	1.34719e-09			-0.108672	5.87909e-06							-0.119736	3.97468e-16	-0.270916	9.86574e-27	-0.198098	4.0224e-14	-0.211575	6.13478e-32	-0.243231	9.76037e-28	-0.254571	2.45802e-09	-0.238512	1.08512e-06	-0.222564	1.47082e-05	-0.296267	6.98586e-07									-0.243759	1.6478e-29
Cenpa					-0.0883616	0.000384108							-0.0402548	9.86371e-05	-0.132367	2.97533e-05					-0.138002	0.000276225																	-0.131432	5.21134e-05
Cenpb					0.0523123	0.00923509							0.0487878	0.000419029	0.0823056	2.98752e-07
Cenpc1																					-0.0772978	0.00052895
Cenpe																					-0.11496	0.000144256	-0.0739344	0.000408838															-0.0650968	0.00976444
Cenpf																			0.124247	0.000365865
Cenph																			-0.0781094	1.85594e-07	-0.0745789	0.0032157
Cenpl															-0.0374663	0.00134391					-0.0821849	7.03284e-09							-0.208778	0.000115945									-0.0676292	4.99548e-08
Cenpm	-0.026339	0.00120111													0.0544501	0.00690554
Cenpp																					-0.0739726	3.0104e-05
Cenpq													-0.0310967	0.000303909							-0.0685691	0.0029937
Cenps	-0.0271891	0.00165004
Cenpt																	-0.0780715	0.000259094
Cenpv																	0.100873	1.31138e-05			0.0912821	5.94778e-09																	0.0806267	8.47668e-07
Cenpw	-0.0351423	0.000885517											-0.0252876	0.00125402							-0.071901	0.000494768
Cenpx																			0.00681904	0.00757502
Cep104													0.0152112	0.00255665	0.0448475	6.75554e-06	0.0430371	0.000761984	0.0391207	7.69263e-07					0.039429	0.00787406													0.0377275	0.000151696
Cep120																			-0.0201778	0.00396382	-0.0431847	3.91539e-05																	-0.0340563	0.00140791
Cep128																					-0.0289365	0.00511335
Cep152																			0.0299426	5.1634e-05
Cep19	-0.0577156	0.000125549											-0.0400584	5.20183e-05	-0.0760235	2.72725e-05	-0.0778825	6.444e-05	-0.0394634	0.00280067	-0.0769241	2.34586e-06			-0.097623	4.98331e-05													-0.0867871	2.42026e-08
Cep192																			0.0522862	0.00415388
Cep290													-0.0288819	0.000412677	-0.0600754	0.000239013
Cep295																			0.0817742	2.25764e-10
Cep350																			0.0146154	5.58266e-05
Cep41	-0.0229421	0.00169156
Cep44															-0.0815047	7.11575e-08			-0.0474377	0.00109675	-0.0749265	8.4581e-06																	-0.0705254	6.32962e-06
Cep55																					-0.0503353	0.0021373
Cep57l1	-0.0827672	4.246e-08	-0.0725868	0.00124082	-0.0738915	0.00103007							-0.0825894	3.47597e-17	-0.0674098	0.0027143	-0.110639	1.39269e-06	-0.057286	0.000998867	-0.153409	3.12641e-14	-0.151767	0.000289232	-0.121395	0.00318979			-0.205337	0.000104613									-0.124893	1.85194e-10
Cep70													-0.0302408	0.00078018																									-0.0621184	0.000221794
Cep72																			-0.024042	0.00014319	-0.0341247	6.23224e-05																	-0.0289733	3.41134e-05
Cep78															0.0251728	0.00579138			0.0325759	0.00320983
Cep83													0.018213	0.00711942					0.0899168	2.73049e-09	0.0765234	9.56875e-05																	0.0746936	0.000249858
Cep97					-0.0587353	0.0014125							-0.0370303	9.52206e-07	-0.0456635	0.000879786			-0.0678099	7.79903e-10	-0.0764719	2.22564e-07	-0.0760176	0.00872065															-0.0613628	2.31886e-05
Cerk	-0.0345648	0.006461			-0.0799432	2.26506e-05							-0.0464984	1.88229e-08
Cers2	0.0822111	0.000298511			0.0884213	0.00475255							0.0813087	1.01244e-09	0.0710544	0.000602745	0.0684373	0.000530386			0.110409	1.84339e-07	0.129892	0.00250243															0.0994437	3.9369e-06
Cers4	-0.0914107	0.0004364			-0.134836	1.97176e-05							-0.103482	9.21603e-13	-0.142626	1.4865e-09	-0.124311	2.24381e-06	-0.0943463	9.27876e-08	-0.113879	1.28603e-07							-0.192466	0.00043617									-0.128042	9.85887e-10
Cers6													-0.00957937	0.00262776					0.032016	0.000130562
Cetn3													0.0179778	0.00491211
Cfap20	-0.0788678	4.18547e-05											-0.0392347	0.0024865					-0.0549374	0.000342469
Cfap36																					-0.0542596	0.0053841	-0.102824	0.00892331
Cfap43															-0.0359833	0.00868282
Cfdp1													-0.00497684	0.000759383
Cfl1			0.0717125	0.00202393									0.0447557	6.18272e-05					-0.0663792	3.54499e-07					-0.0814315	0.00701785
Cfl2																	0.0155959	0.000494041
Cflar	0.0649991	0.000308876	0.0383489	0.00971604									0.046835	3.65324e-06
Cgrrf1																			-0.0217898	0.00501657
Chaf1a															0.0652219	2.2544e-05	0.0729012	0.00519096	0.0876988	3.64386e-06	0.100501	2.66311e-05																	0.0995052	5.2406e-06
Chaf1b	-0.139132	2.30336e-14	-0.0844601	2.19782e-05	-0.0785427	0.00207904							-0.105967	4.57255e-21			-0.086338	0.00227707	-0.0876729	1.11941e-05
Champ1																			0.0523806	5.80147e-07
Chchd1	0.0869329	0.000110897	0.0684652	0.00348604	0.108782	3.91416e-06							0.0948858	2.31288e-15	0.191638	1.18844e-19	0.152177	5.50955e-13	0.126306	2.50392e-14	0.109133	4.3253e-08	0.157836	2.23841e-05			0.145938	0.00273883											0.131171	1.75553e-12
Chchd2	0.0975837	1.49e-11	0.0975854	4.97125e-07	0.145664	4.19524e-13							0.118052	1.01511e-32	0.0782488	1.35731e-05	0.111789	3.06959e-09	0.0439451	0.00158254																			0.0527419	0.00245688
Chchd3													-0.0462711	0.000206465	-0.0161392	0.000646884
Chchd4	0.139966	9.34558e-14	0.129028	4.09173e-11	0.133836	7.02291e-10							0.145342	7.05543e-40	0.254846	1.45149e-30	0.204882	1.51163e-22	0.275076	1.56082e-62	0.342704	4.97069e-56	0.301414	3.1676e-14	0.327062	4.36702e-14	0.169417	0.00152769	0.411802	1.99242e-18									0.306111	7.14979e-49
Chchd5	-0.0445473	0.00915841	-0.0457867	0.00767655	-0.065283	0.00768701							-0.0528716	8.93501e-08	-0.0701441	1.97438e-05	-0.0637645	0.00287513	-0.089056	7.28158e-14	-0.0815942	1.43317e-06	-0.102566	0.00449768	-0.0806155	0.00855813													-0.0732431	8.53787e-06
Chchd7			0.0728828	0.000922149									0.0515121	8.33531e-07					0.0384241	0.000635248	0.0694643	0.00316367
Chd1	0.0437589	0.00365051											0.0505404	1.11593e-05	0.1486	1.11379e-11	0.158115	4.39069e-12	0.145224	7.06288e-22	0.149428	3.47321e-12	0.130441	0.00344651					0.189784	0.00329703									0.138021	6.8926e-11
Chd2	-0.0721408	0.00465702	-0.122576	1.54228e-05	-0.114631	0.000386766							-0.107589	4.07369e-14	-0.191154	6.91922e-14	-0.172249	1.43005e-10	-0.138289	4.51939e-14	-0.177526	3.8292e-14	-0.181969	1.97931e-05	-0.128868	0.00648909			-0.154121	1.66305e-05									-0.171893	3.95062e-14
Chd4	0.11123	3.4814e-05			0.0926018	0.00533658							0.0886457	5.39817e-10	0.114003	1.26542e-05	0.1558	9.45556e-10	0.147732	1.02788e-14																			0.0664444	0.00539441
Chd7	0.0464567	0.000190236	0.0476919	0.00481812	0.0515916	0.00995722							0.0460831	6.22575e-09
Chd8																			0.0685932	1.96006e-05
Chd9															-0.0730967	0.00580979					-0.0780424	0.00312926																	-0.0767778	0.00135852
Chdh																					-0.0204199	0.00152564
Chek1															0.0489884	0.000339757			0.0451484	0.00364155
Chek2	-0.0262945	0.00700439											-0.0292103	7.53535e-06	-0.0513487	0.000413181					-0.0433084	0.00316559																	-0.0374228	0.00633604
Cherp															0.0724496	7.17729e-05	0.0406167	0.00128155	0.0769303	4.77982e-08	0.108001	4.16938e-09	0.145505	0.000147656			0.105331	0.00722516											0.10757	1.96074e-10
Chfr																			0.00707888	0.00998303
Chic1													-0.00908731	0.00923607
Chic2	-0.0596984	0.00984765											-0.0504846	0.000182496	-0.128667	3.5681e-08			-0.0845958	1.20603e-06	-0.0942751	3.3475e-05																	-0.0973251	8.02834e-06
Chid1			0.021172	0.00943583									0.00855711	0.00362368					-0.0152809	0.00890045
Chka																					0.0526689	0.00677065
Chkb															-0.0718753	3.65421e-06	-0.0575438	0.000456171	-0.0404386	3.63017e-05	-0.0469604	0.000114474					-0.133484	3.1208e-05											-0.0688499	2.54604e-08
Chm																					-0.0574967	3.84029e-05																	-0.045944	0.000552739
Chmp1a																			-0.0756689	1.33606e-06
Chmp1b															-0.0676158	0.000157314	-0.0607392	0.00106136	-0.0637569	1.74424e-08
Chmp2a	0.0807365	0.000336501											0.0474572	5.96946e-06
Chmp4b	0.242563	5.32761e-38	0.151322	4.09173e-11	0.200677	1.13798e-17							0.19997	2.1386e-62	0.177792	2.21997e-16	0.171118	8.20046e-15	0.164948	4.71922e-26	0.185117	2.63085e-16	0.203982	2.45042e-06	0.15698	3.45673e-05	0.129932	0.00854409	0.190522	0.00785434									0.164521	3.92954e-15
Chmp5	-0.0807564	6.61627e-06			-0.0851889	0.00192705							-0.0739748	8.38482e-11	-0.146895	3.54977e-12	-0.121565	1.82538e-07	-0.132846	2.23812e-19	-0.129285	5.41485e-10	-0.142149	0.000560145					-0.202563	0.000402554									-0.121126	6.92029e-10
Chmp6	0.0419526	8.78359e-05	0.0636313	0.000451482									0.0489904	3.96766e-09	0.0432085	0.00793056			0.0264043	0.003931	0.0390397	0.00110693																	0.0283283	0.0094596
Chn2															-0.0284164	0.00151622					-0.033757	0.00106426	-0.0618462	0.00712268
Chordc1	0.0869346	1.92004e-06											0.0713868	2.61479e-10	0.0823533	9.34723e-09	0.0648295	0.00122722	0.0600108	0.000173868							0.147911	0.00225975											0.067214	0.00172689
Chp1													-0.0300515	0.00116905	-0.0791486	1.28776e-07			-0.0516647	1.1207e-05	-0.0657564	4.27323e-05																	-0.0634021	2.50522e-05
Chst15															-0.0340299	0.000947073
Chst2	-0.0530364	6.74822e-13	-0.0356136	0.00232088	-0.0556244	2.93746e-07							-0.0483833	1.5409e-24
Chst7													-0.0156401	0.000647993
Chsy1													0.0157595	0.00174097					0.049708	1.0235e-07
Chtf8	0.0744552	7.91383e-05	0.0515443	0.00598272									0.0550563	1.09597e-07																									0.0568167	0.0015662
Chtop	0.052268	0.00630641			0.0817441	0.000726093							0.0593072	1.38924e-08	0.0563175	3.35985e-06			0.0658184	0.000131581	0.0680339	2.96116e-06																	0.0648731	9.8692e-07
Chuk	0.0811348	4.43637e-11	0.0532606	0.000492865									0.0615143	2.51096e-17	0.0570717	5.63602e-05	0.0832442	4.66334e-08	0.0704806	6.93331e-11	0.043813	2.4583e-05																	0.0474536	6.30369e-05
Churc1													-0.0551564	6.84147e-05	-0.0773828	0.00208378	-0.0926377	0.000176139	-0.0875112	3.67147e-07	-0.0796472	0.000793137																	-0.0894232	5.03648e-05
Ciapin1	0.0995062	9.07453e-12	0.0757183	6.78599e-06	0.0874961	8.5477e-07							0.0928747	4.86716e-26	0.151598	4.57369e-17	0.165007	5.43936e-15	0.149067	5.44199e-21	0.130973	8.22641e-13			0.1034	0.00211821			0.145614	0.00630539									0.123683	4.48597e-11
Cib1	0.0561422	3.31124e-05	0.0497648	0.00198052									0.0505283	1.77136e-09			0.0548896	0.00240656	0.0437041	1.20562e-05
Cic	0.0639317	0.000979541	0.0825104	0.000521052	0.0775623	0.00187563							0.0722886	1.49876e-09			0.0444713	0.00237328			0.0555651	0.00585127
Cinp															0.0683988	3.78901e-10	0.0900524	1.80049e-05	0.0905171	1.96883e-10	0.0854712	5.79717e-05			0.13343	0.00341571													0.0906712	1.63232e-06
Cipc	0.0344622	0.00277323											0.0192081	0.00166277	0.0409454	0.000859918			0.0356651	0.000151116
Cir1	-0.110714	7.31279e-10	-0.0935497	0.000150421	-0.0959844	0.000555287							-0.107858	2.13617e-20	-0.123453	1.83092e-08	-0.0940034	0.000183233	-0.0853893	1.44104e-08	-0.161057	1.69024e-14	-0.14069	0.00141305	-0.13318	0.00014108													-0.136915	1.95428e-11
Cirbp	-0.217821	6.9608e-20	-0.10894	0.000510767	-0.220319	6.33546e-15							-0.190608	3.52436e-39	-0.31557	9.17146e-35	-0.20515	7.29538e-14	-0.18943	2.3114e-23	-0.201766	8.93543e-17			-0.196454	0.000752706	-0.276772	4.19578e-09	-0.355175	6.69957e-07									-0.227926	1.37138e-22
Cisd1			0.0685965	0.00470853									0.065767	4.7731e-07	0.118134	6.95361e-08	0.107092	8.69337e-05	0.0689649	0.000573038	0.101217	0.000116894	0.140763	0.00198794															0.113534	1.73989e-06
Cisd2	0.093298	0.000178305	0.0663934	0.000571042	0.1001	0.000133636							0.0868395	9.41961e-13	0.0840972	0.000268341	0.140826	9.92539e-11	0.0763144	9.81183e-05	0.162569	7.5643e-13			0.23368	5.63651e-06													0.129231	1.0312e-08
Cish	-0.123821	1.57019e-15	-0.0889769	0.000139773	-0.094075	0.00038323							-0.107841	8.55578e-25					-0.0188875	0.00428349
Cit																					-0.0750813	8.90629e-05							-0.160112	0.0026014
Cited2	-0.196715	2.39302e-13	-0.173522	1.44502e-08	-0.168639	1.59961e-06							-0.194717	8.49183e-30	-0.288523	2.37542e-22	-0.241286	5.11822e-12	-0.231573	1.83197e-24	-0.199089	8.25997e-11	-0.277168	1.41404e-07			-0.274071	5.66499e-05	-0.242719	0.00283943									-0.242224	3.47257e-17
Ciz1																			-0.049149	0.00403797
Ckap2																					-0.0582407	0.00846658
Ckap2l															-0.0204459	0.00136367					-0.0837971	0.000209944			-0.0814461	0.00192381			-0.186759	0.00510237									-0.0654047	0.00011873
Ckap4	0.12122	5.46002e-16	0.0974531	8.62863e-08	0.115117	1.17468e-07							0.113256	6.88792e-33	0.144127	5.06855e-14	0.101417	1.79352e-09	0.10443	1.00236e-13	0.117285	1.11626e-06					0.158606	0.000456458											0.13802	1.62147e-10
Ckap5	0.0197979	0.00832893																	0.0967749	6.00582e-06
Ckb					-0.0389619	0.00585594							-0.022087	0.000499068
Cklf													-0.0296123	0.00549774					-0.0407829	0.00799729	-0.100703	3.22793e-07																	-0.0707492	0.000122603
Cks1b	0.104473	2.72251e-07	0.0580414	0.00652926	0.138805	1.72014e-12							0.110031	2.47082e-20	0.211383	3.75531e-12	0.196678	4.12407e-09					0.168286	0.000191037			0.170077	8.0938e-05											0.0965899	0.00133835
Cks2																					-0.129722	0.000230859							-0.220015	0.00102136									-0.142625	0.000138667
Clcn3																			0.0384879	0.000686538
Clcn4																			-0.0329734	0.000636494
Clcn5			0.0443056	0.00640447									0.0257431	7.61809e-05	0.0329716	0.000442107			0.0269221	1.09226e-06
Cldn34c1			-0.0269495	0.00481092									-0.0179766	2.48051e-05
Cldnd1													-0.0401377	0.00400921
Clec10a																			0.0566868	5.07293e-11	0.0558247	8.91473e-06			0.0418245	0.00684961													0.0422076	1.35531e-05
Clec11a																																							-0.0210694	0.0072484
Clec12a																					-0.0543911	0.00610429
Clec14a													-0.0144788	0.00315921
Clec1a	-0.0836666	1.01573e-06	-0.0944616	0.000218339	-0.102064	1.39406e-05							-0.0997648	2.43594e-19			-0.0901974	1.59592e-08
Clec2d	-0.285717	3.72305e-32	-0.272435	9.85135e-22	-0.171229	4.3449e-09							-0.251931	3.85329e-63	-0.171859	1.75404e-15	-0.192972	8.66057e-14	-0.153694	6.68832e-22	-0.15667	4.18514e-13	-0.221708	1.35818e-07			-0.214372	2.50376e-05	-0.144385	0.00515771									-0.177311	3.04084e-18
Clec4d																			-0.0279708	0.00487965
Clic1	0.0590951	0.00369648	0.081979	6.73767e-05	0.095953	6.14286e-05							0.0774231	2.6489e-13							-0.0618857	0.00281254
Clic4	0.0553522	0.000153868	0.057553	0.00292145									0.0480564	1.59491e-07	0.0695776	0.000123902
Clic5															-0.0337461	4.18178e-05	-0.0348588	0.000171852	-0.0242678	4.64434e-05	-0.0442389	1.33666e-07	-0.0581034	0.00146825															-0.0355152	3.87819e-06
Clint1	0.188511	1.31525e-21	0.112424	8.52598e-08	0.119444	9.62007e-06							0.147252	7.06695e-35	0.0926134	1.04841e-05	0.105423	7.96386e-05	0.0925656	6.31785e-07	0.0807838	0.00200792																	0.0864894	0.000529989
Clip2	-0.0241164	0.00780373
Clk1	-0.134821	1.35642e-06	-0.148188	4.91795e-07	-0.0938777	0.00602491							-0.139483	2.16087e-18	-0.258307	3.34698e-19	-0.163483	7.56755e-08	-0.211118	1.08646e-26	-0.191435	3.23801e-17	-0.18055	9.38847e-05	-0.132542	0.00119628	-0.169098	0.00182373	-0.240332	0.000718466									-0.207516	2.15036e-17
Clk3																			-0.00450787	0.000830191
Clk4															-0.028889	0.00830194			-0.04125	0.00440076
Cln6	-0.0672126	9.8397e-06											-0.0453716	6.00446e-06	-0.0772126	7.2193e-06	-0.113425	4.64861e-08	-0.0974213	1.42812e-13	-0.0577615	0.000682515					-0.0983536	0.00967239											-0.0718105	9.86422e-06
Clnk															0.0317556	1.84451e-05			0.0377059	3.48398e-08	0.0284182	0.00101245																	0.0328813	8.05677e-05
Clns1a	0.104529	1.78719e-07	0.0717772	2.98975e-07	0.071516	0.000103827							0.0918267	1.05727e-20	0.136812	2.2159e-10	0.0991302	3.62099e-05	0.0694972	3.43419e-06	0.151263	2.17517e-11	0.16483	0.000292342															0.122234	1.38166e-08
Clpp	0.132229	2.19729e-12	0.0683145	4.81638e-05	0.113589	3.48672e-07							0.10922	1.33307e-24	0.167468	1.02656e-21	0.164373	6.05261e-14	0.111137	3.74253e-11	0.161086	5.94675e-13	0.203645	1.65898e-06			0.177154	0.000155795	0.202426	0.000531264									0.172244	5.7063e-17
Clptm1l	0.0792338	5.64934e-05											0.0521059	6.68524e-09	0.105983	2.38395e-09	0.0594891	0.00193517			0.142483	2.8341e-11	0.142886	0.00133069															0.103883	3.28783e-07
Clpx													0.0217383	0.000208994			0.0699745	0.00165348	0.0100179	0.00382895
Clspn	-0.0205742	0.000434992											-0.0142257	0.00046857			0.0609721	0.00368646
Clstn3	-0.0343085	0.00756645											-0.0294536	0.000412677
Clta																													-0.13946	0.00372229
Cltb	0.251601	3.83166e-31	0.230063	9.37972e-31	0.189978	9.11465e-17							0.229422	6.99571e-80	0.237648	6.5866e-30	0.192602	8.38168e-18	0.161001	2.27411e-21	0.177347	1.24983e-21	0.206658	1.08963e-06	0.167615	4.38702e-09	0.232154	2.12767e-07	0.207412	1.26082e-06									0.206516	8.02045e-27
Cltc	0.119749	3.82119e-10	0.0872546	3.69749e-05	0.0877784	0.00292871							0.100702	1.91586e-17	0.0739629	0.000839113	0.093191	0.000458699	0.0728969	2.40602e-05	0.0713996	4.02759e-05			0.0892249	0.00753905													0.0841907	2.44228e-05
Clu	0.0444095	0.000708014											0.0369374	0.000149427
Cluap1																																							0.0531261	0.00726343
Cluh	0.0566373	1.23357e-05			0.0411581	0.0029887							0.0402189	9.59188e-09	0.0879227	1.72929e-09			0.0941105	1.29931e-13	0.0892672	1.52964e-08							0.0912112	0.00899442									0.0810099	9.27907e-08
Clybl																	-0.0425727	0.000719733
Cmah																					0.0249708	0.00938168
Cmas	-0.11288	9.75068e-07	-0.0994193	0.000758363	-0.165931	1.77295e-08							-0.134823	6.72786e-22	-0.191933	8.19208e-16	-0.188168	4.32062e-12	-0.261167	4.34796e-48	-0.116893	2.29288e-08	-0.164697	3.63359e-05			-0.196228	7.08223e-05											-0.17409	3.3442e-16
Cmc1	-0.155283	4.51349e-17	-0.100188	3.87294e-05	-0.130782	2.01317e-07							-0.132157	3.51464e-30	-0.0914236	6.70183e-06	-0.0817218	0.000841514	-0.100181	1.52188e-11	-0.117347	1.55607e-09			-0.122121	0.00282455													-0.101764	7.28902e-08
Cmc2																					-0.0770482	0.00307575
Cmc4	-0.0359392	0.00488422	-0.0453029	0.0047568	-0.0649311	0.000123963							-0.0459319	6.90417e-10	-0.0603479	0.000171283					-0.0638339	1.24901e-05			-0.0693513	0.00663002													-0.0602848	3.37835e-05
Cmip															0.0389724	0.00660237			0.0645363	3.06376e-06
Cmpk1	0.0546379	0.00192785	0.0732559	0.000442956									0.0535181	1.50701e-08					-0.0521788	0.00833927
Cmpk2													-0.0229187	0.000290042	-0.0399719	1.58639e-05					-0.0469504	4.84672e-08	-0.0850968	1.1632e-05															-0.0427898	2.27011e-07
Cmss1																			0.0589442	0.00214379
Cmtm3																			-0.0750715	4.40206e-11	-0.0466482	0.00459032																	-0.0434401	0.00577154
Cmtm7	-0.121239	4.62134e-06	-0.174362	3.47985e-10	-0.137105	1.76228e-05							-0.129755	2.30407e-18	-0.190963	7.32496e-22	-0.118329	6.17331e-09	-0.128377	8.99907e-18	-0.206367	2.00866e-27	-0.219812	8.3102e-09	-0.168495	3.42411e-07			-0.195048	1.16068e-07									-0.182252	1.32017e-21
Cmtm8	-0.0437974	3.69822e-06											-0.0289475	0.000105322	-0.0484477	0.000454543			-0.0535171	5.58531e-11	-0.0419458	0.000307147	-0.0644316	0.00965701															-0.0446927	5.70617e-05
Cnbp	0.216595	2.8229e-46	0.178637	2.69274e-19	0.169329	2.52064e-15							0.201656	3.32714e-85	0.251447	1.3945e-46	0.237973	9.52495e-36	0.167142	2.23424e-32	0.288757	1.32037e-56	0.291468	6.85434e-17	0.172032	5.16558e-10	0.273311	2.24384e-12	0.397193	2.30726e-24									0.274487	4.52677e-59
Cndp2															0.0564296	0.000870621			0.0245307	0.00397766	0.0635443	0.000345678																	0.0665708	7.11039e-05
Cngb1	-0.0445476	1.49387e-08	-0.041309	0.00269269	-0.0555662	2.41057e-05							-0.0485425	8.27509e-18	-0.0702513	1.76704e-11	-0.0407385	0.00023873	-0.0293709	0.000949535	-0.0576282	4.59323e-10	-0.0474679	0.00459448	-0.0521663	0.00204571			-0.0980764	0.00172764									-0.0591789	4.74784e-11
Cnih1	0.0491801	0.000410277	0.0668622	0.000631717									0.0599953	7.39371e-09	0.0758266	2.8409e-05	0.0739744	0.00475108			0.083132	0.0010732																	0.0916032	4.9189e-05
Cnih4	0.0711774	0.000326961	0.0752961	0.000406513	0.0830229	0.00475554							0.077876	2.64702e-11			0.0932649	2.16774e-06	0.087965	2.80121e-08																			0.0704607	0.00221143
Cnksr3													-0.0307592	2.44276e-06			-0.0606723	3.00477e-06	-0.030273	0.000404088
Cnn2	-0.103013	1.47456e-05	-0.0937071	0.000481839	-0.12873	4.17421e-07							-0.104154	2.51878e-15	-0.179444	3.99034e-14	-0.152993	2.76948e-09	-0.174338	5.49144e-22							-0.143865	0.00472134	-0.215658	0.00148813									-0.116189	6.67086e-07
Cnnm2																			-0.0141119	0.00309812	-0.0180422	0.0025867
Cnot1	0.0559921	0.00129256											0.0306271	0.00313991					0.0637462	0.00232644
Cnot11																	0.0513907	0.00744291
Cnot2													0.0496627	8.52394e-05
Cnot3																					-0.0719003	0.00201374
Cnot4													0.0381483	0.00286026	0.0698227	0.000473491			0.0167729	0.00565595
Cnot6			0.0363074	0.00961622													-0.00832938	0.0039233	0.0220504	0.00625634
Cnot6l															-0.0870542	0.00214587			-0.0651634	0.0016506	-0.112031	2.66488e-09	-0.164274	0.000140073					-0.158662	0.000118222									-0.104059	2.22651e-06
Cnot7	0.0578459	0.000213876											0.0405143	0.00062332
Cnot8																	-0.0483126	0.00999829	-0.0513051	0.00179756	-0.0916554	2.06833e-05							-0.163913	0.00265265									-0.0806993	0.000100988
Cnot9															0.0725791	5.0015e-08																							0.0497825	0.0013434
Cnp	-0.0687664	9.127e-06	-0.0700138	0.00305469									-0.0626212	1.66968e-09	-0.0800716	0.000236841	-0.123707	1.44142e-08	-0.118516	1.30895e-14	-0.0907359	1.57558e-05							-0.160082	0.00556867									-0.0857249	1.93451e-05
Cnppd1	0.0442739	0.00154798											0.0241058	0.000239072
Cnpy2																			-0.0433853	0.00982976
Cnpy3															-0.0701398	0.00115292			-0.0516765	0.00403221
Cnpy4	-0.0391111	0.00359605											-0.0392841	1.2466e-05
Cnrip1			-0.0666263	0.00286626									-0.0563517	3.96166e-08	-0.129456	3.3208e-11	-0.072387	0.000816408	-0.0728474	1.42765e-10	-0.140438	1.61211e-17	-0.214559	2.54247e-11	-0.0744868	0.00743121													-0.12372	4.33672e-14
Cntd1																			-0.0225376	0.0018557
Cntln					-0.0459705	0.0027582													0.032135	0.00444263
Cntrl															0.107618	4.79681e-06			0.0771975	3.70188e-05
Cntrob																					-0.0447499	1.47434e-05
Coa3	0.0920988	6.66435e-05											0.049506	7.0933e-07	0.0871653	0.000889914	0.0351091	0.000242726	0.0494871	0.00625603									0.220564	0.00255524
Coa4															-0.00845324	0.00059691			0.00530385	0.00942066
Coa5													0.0130477	0.00208668
Coa6																	0.0657163	0.00446361
Coa7	0.0439548	6.71127e-05											0.0399239	2.20448e-07	0.066171	3.54174e-05	0.0688103	3.03346e-05	0.058692	8.63053e-08	0.0379412	0.000495329																	0.0602595	2.21905e-06
Cobll1													-0.0235982	8.92105e-05			-0.0391077	0.0090162
Cog2	0.031036	0.00542306
Cog3																			0.0269208	4.87664e-05
Cog7																			-0.0293482	0.00119857	-0.0496808	2.00652e-05	-0.0612893	0.00858936															-0.0406348	0.000386723
Cog8													0.0383342	0.000249581			0.062349	0.00696236
Coil													0.0179655	0.00301405
Col16a1	0.0671262	8.47427e-08			0.07799	5.9959e-06							0.0577152	1.58781e-14			0.0459953	0.00816588	0.0230851	0.00460481
Col4a2			0.0567361	0.00124082									0.0284097	0.000160983			0.0125061	0.00866094
Colgalt1	0.052642	0.00249943	0.0600439	0.00972342									0.05897	5.31528e-08	0.109238	3.80298e-07	0.0736702	0.000418566	0.105149	5.58636e-10	0.154551	1.56647e-13	0.132116	0.00531823	0.139861	5.11053e-05			0.153869	0.00473845									0.136094	2.78793e-12
Commd10															-0.0496506	0.000985165
Commd2	0.0896087	2.10393e-07			0.0618138	0.00397939							0.064725	6.03188e-12	0.0732917	0.00035641	0.0386209	0.00175093	0.0678016	8.07092e-05	0.0569358	0.00927081
Commd4													-0.0447292	0.000367718	-0.0779018	9.51752e-05																							-0.063301	0.0033934
Commd7			0.0704947	0.00265877									0.0325281	0.0059625
Commd8	-0.043478	0.00782931											-0.0235563	0.00231651					-0.0596536	0.000259616	-0.0855535	3.9284e-05																	-0.0658729	0.00174656
Comt	-0.062403	0.007235											-0.0393922	0.00379877
Comtd1															0.0375802	0.00359612
Cop1	0.0661284	0.00107841	0.0724948	0.00115532									0.062416	7.58058e-08			0.0741494	0.0061079
Copa	0.112091	3.55065e-09											0.0597157	4.1394e-07			0.0712707	0.00747396
Copb1	0.159854	2.28242e-16	0.0712848	0.00595604	0.138302	4.38639e-08							0.127724	2.33637e-26	0.107633	7.22609e-07	0.138895	3.45769e-12	0.0699938	3.31405e-05																			0.071032	0.0046031
Copb2	0.129552	1.84412e-11	0.0431067	0.000136731	0.141129	1.43496e-08							0.105245	1.10562e-23	0.169356	7.04639e-14	0.0982458	0.00038022	0.0618596	0.00025559	0.0467001	0.000171271																	0.0585754	4.86993e-06
Cope	0.175227	1.02449e-16	0.0857194	0.000239127	0.188187	8.12859e-16							0.15541	1.80827e-39	0.117574	1.3719e-07	0.125827	2.76735e-08			0.105441	3.17599e-07	0.109969	0.00800852			0.178387	9.72228e-06											0.119677	3.56744e-10
Copg1					0.0829209	0.000884792							0.0430607	1.27439e-05	0.0440114	6.2921e-05	0.062779	2.22151e-06
Copg2													-0.0334202	0.000226346
Cops3	0.0884335	3.40648e-07	0.0956859	6.61535e-05	0.11772	9.06147e-06							0.103221	4.04619e-18	0.125172	1.22184e-08	0.141202	3.67002e-08			0.13069	3.04851e-08					0.0906734	0.00573279											0.120509	6.34642e-09
Cops4													0.0560616	2.23141e-05			0.0741033	0.00660883
Cops5	0.0595399	0.000585602	0.0853562	0.000459336	0.0787725	0.00944048							0.0763003	1.42033e-10	0.0580703	0.000244463			0.0850327	4.94549e-06																			0.0663707	0.000896071
Cops6	0.0781476	0.000133922	0.043853	0.00652926	0.0954074	0.00146							0.0734845	8.75833e-11	0.078409	0.000570007	0.0653197	0.00744291			0.0436663	0.00897691					0.110568	0.00750999											0.0609171	0.000248349
Cops8	0.0467078	0.00683857											0.0147083	0.00359704					0.055508	4.66842e-05
Copz1	0.0723672	0.000105871	0.0717625	0.000393908	0.0665315	0.00145627							0.0736656	2.09331e-13	0.0681574	0.00162652
Coq10b	-0.119922	3.01258e-07	-0.154682	6.99973e-09	-0.0982781	0.00631434							-0.134856	4.43568e-20	-0.0726362	0.0050945	-0.0828848	0.00443856	-0.0615371	0.000632946
Coq2																					0.0388221	0.00978977
Coq6																					-0.0270828	0.0052254	-0.0483967	0.0051271
Coq7																			0.0497206	0.00366464
Coq8a	-0.202217	4.29032e-35	-0.216785	9.85163e-21	-0.23761	1.63617e-25							-0.220308	9.1863e-87	-0.164124	2.93034e-32	-0.169688	3.88482e-20	-0.103201	1.18278e-27	-0.0858009	1.06184e-11	-0.107703	2.56403e-05			-0.154156	2.8709e-05	-0.11967	9.5727e-08									-0.114572	1.19148e-20
Coq8b																			-0.0180369	0.00316075
Coq9	-0.0700166	9.8946e-06											-0.0501479	8.33531e-07					-0.0442052	0.00238776	-0.0806399	1.83388e-06																	-0.064835	0.00014266
Coro1a	-0.247783	8.70673e-28	-0.111018	6.69709e-05	-0.16631	1.82973e-09							-0.168492	2.40896e-35	-0.217684	7.58529e-31	-0.132646	5.00335e-09	-0.225248	2.85218e-44	-0.123206	5.99737e-11	-0.159775	3.06898e-05	-0.174393	5.37479e-07	-0.198738	3.27881e-05											-0.160667	1.0814e-17
Coro1b															-0.153105	1.09211e-11	-0.112272	9.80508e-06	-0.0912316	1.83907e-07	-0.132703	4.05888e-10	-0.151876	0.000208147	-0.127088	0.00489894													-0.141813	1.43986e-12
Coro1c															0.0497782	0.00617293			0.0607553	0.000183675	0.0506447	0.00736344																	0.0522616	0.00437739
Coro2a	-0.1158	5.18456e-09											-0.0598925	2.49282e-06
Coro2b	-0.0356567	4.10677e-07											-0.0172462	5.94648e-05
Coro7													-0.0489026	5.26339e-06			-0.0725462	0.00767707			-0.13411	3.97618e-09	-0.187306	1.44429e-05															-0.103629	2.33559e-06
Cotl1	-0.0715814	5.23373e-06	-0.0624107	0.000557996	-0.068888	0.00189349							-0.0700414	9.96086e-13	-0.12211	8.58994e-08	-0.121477	1.30624e-06	-0.169781	3.03846e-22	-0.122106	4.73227e-07	-0.14763	0.00144318															-0.116745	6.2859e-07
Cox10	0.0576805	1.74381e-06			0.061537	8.9655e-05							0.0518881	6.86142e-14	0.0527519	7.14791e-05	0.0640348	0.00013819	0.074162	7.08041e-11	0.052463	0.000167763																	0.054877	5.28088e-05
Cox15													-0.0169928	0.000931671
Cox17	-0.0647838	0.00106232											-0.060755	1.18198e-07
Cox18	0.0617869	9.19426e-05	0.0512923	0.00154827	0.0464509	0.00582438							0.0570769	8.79147e-12	0.0606508	5.91487e-05			0.0626683	1.96866e-06																			0.0596922	0.000697674
Cox19	0.077368	1.72706e-06											0.0431452	1.90255e-06			0.0714074	3.7158e-05	0.0834519	8.36713e-09
Cox20													-0.0351115	0.00672476					-0.0524996	0.00265996																			-0.0575485	0.00725572
Cox4i1																			-0.0506938	2.71839e-05
Cox4i2																			0.0248163	0.000176551	0.0680639	1.68054e-14	0.0597652	0.000661312	0.0712161	0.00306255													0.0640135	3.73197e-10
Cox5a	0.186013	6.03965e-20	0.181307	1.51574e-17	0.205147	9.93643e-18							0.203294	4.25808e-63	0.213146	4.1246e-28	0.236954	6.88445e-31	0.14269	1.46676e-20	0.181018	2.28384e-22	0.201455	3.41578e-09	0.0944782	0.00975251	0.205684	6.02948e-07	0.218004	4.55442e-06									0.190878	4.58366e-26
Cox5b			0.0684654	0.00730472	0.0805252	0.00741671							0.0633001	4.44712e-07
Cox6a1					0.0861517	0.00419724							0.0504653	1.32453e-05	0.084405	0.000967679
Cox6b1	-0.0716996	0.0034773											-0.0438885	0.00100476	-0.0525912	0.008799			-0.0918604	4.01652e-09	-0.0965556	1.19482e-06			-0.126416	0.000756388													-0.0829007	1.72301e-05
Cox6b2															-0.0764976	9.4525e-06			-0.0886013	1.35841e-07	-0.0807085	4.92043e-06																	-0.0799451	2.43642e-06
Cox6c	-0.0742359	0.00126973											-0.0483301	0.000753675					-0.092506	3.24986e-10	-0.0871384	4.7614e-05			-0.12534	0.00292434													-0.0773824	0.000138585
Cox7a2l	-0.0752102	0.000378121											-0.061048	1.00028e-08	-0.249899	4.6146e-40	-0.150239	1.57258e-12	-0.169501	2.76527e-24	-0.248427	3.32787e-34	-0.267091	1.89656e-12	-0.290987	6.44184e-15	-0.154522	4.62183e-05	-0.144249	0.00155939									-0.237454	4.83624e-37
Cox7b	0.135745	1.5299e-08	0.106751	1.50981e-05	0.135494	1.0855e-07							0.131487	1.14475e-24	0.128499	3.95908e-08	0.0763367	0.00539866									0.153794	0.00318839											0.0681919	0.00486934
Cox8a															-0.0600409	0.00529062			-0.0656679	1.44196e-05	-0.116942	3.89737e-10	-0.128062	0.00204412	-0.116364	0.000657091													-0.0924188	4.35375e-07
Cpa3																			-0.0701879	6.82494e-07
Cpne2	-0.0975022	7.08994e-05											-0.080759	1.38924e-08	-0.105415	0.000100872	-0.0860569	0.00457174	-0.0864951	8.20489e-06	-0.118153	3.96561e-07							-0.152105	0.00568959									-0.0903167	0.000161624
Cpne3													0.0295717	0.00110468	0.0641075	0.00532531			0.0929937	9.1911e-09	0.081165	0.000564377																	0.0689823	0.00319128
Cpne8	0.128264	9.77409e-19	0.104364	3.54153e-08	0.0880765	7.09222e-07							0.105279	4.85051e-33			0.105095	7.39294e-18
Cpox	0.0425614	0.00299149													0.0420395	0.000167182	0.0468961	0.000246528																					0.0421489	0.00737694
Cpped1	-0.0373327	0.00276129											-0.0250619	0.00314259
Cpq																	-0.0989781	0.00019008	-0.0676964	6.24008e-07	-0.0624236	0.00121489
Cpsf1																					-0.0480274	0.00364707
Cpsf2	0.102161	3.36595e-07			0.0709928	0.00224592							0.0836577	6.29776e-13	0.092703	4.65196e-07	0.139615	5.8873e-08	0.058931	0.00490534	0.0940484	5.5584e-05	0.147155	0.00465066															0.0776883	0.000310483
Cpsf3																			-0.0552798	0.0022943
Cpsf4													0.0180019	0.00655089					0.0372469	0.00335588	0.058435	0.000689666
Cpt2													-0.0212143	0.00589191					-0.0603907	3.59893e-09	-0.0531592	6.72325e-06																	-0.0566628	1.2222e-06
Cpxm1	-0.063633	5.53441e-07	-0.0734283	9.5809e-05	-0.0740042	5.58658e-05							-0.0695179	1.30076e-17	-0.0249015	0.00910069			-0.0299845	3.32877e-06
Cracr2b	-0.0474046	0.000202722	-0.0789866	0.000204696	-0.0781064	0.000215648							-0.0725248	2.45738e-16			-0.0768128	2.00986e-09
Cradd													0.0196329	0.00203634
Crat																			-0.0211998	0.00399284									-0.0470068	0.00925741
Crbn	-0.0335816	0.00760057											-0.0279066	0.000953664
Crcp	0.0393044	0.00312383											0.0274617	6.1566e-05							0.0640551	0.000198375
Creb3													0.0266021	6.81927e-05
Crebbp	0.0457633	0.00367163											0.0468053	2.63368e-05			0.0819026	0.00424268	0.0713377	0.000177974
Crebl2	-0.0386079	6.41284e-06											-0.0405002	3.96457e-10					-0.0204441	5.02703e-06	-0.027565	0.000352058
Crebrf	-0.110799	4.98452e-15	-0.10499	7.69368e-06	-0.127487	4.71169e-07							-0.12188	3.40838e-31	-0.149023	1.62506e-16	-0.140097	1.45986e-15	-0.105249	1.1541e-22	-0.155131	8.63806e-24	-0.156666	1.16186e-06	-0.112488	5.47481e-07			-0.167324	5.07361e-06									-0.150398	1.12536e-23
Crebzf			0.0477724	0.00576513													0.0626248	0.00764875
Creg1															-0.101185	8.94582e-05	-0.0863526	0.00229656	-0.122602	1.03305e-11	-0.127971	3.10188e-08																	-0.101108	2.43422e-05
Creld2	0.117651	1.1592e-11	0.0553708	0.00528191	0.0604279	0.00357292							0.08672	1.03255e-18	0.149063	1.16743e-17	0.134446	4.75983e-12	0.124878	1.42838e-16	0.147161	4.8567e-14	0.163292	5.22078e-05	0.200891	2.73382e-07													0.145917	6.94384e-17
Crip1	-0.136994	2.8624e-09	-0.130811	2.24085e-08	-0.143363	2.82227e-07							-0.131867	2.13642e-21	-0.168285	6.16275e-10	-0.114054	0.000177129	-0.134214	1.43077e-12	-0.183431	2.39903e-15	-0.15931	5.98462e-05	-0.242728	3.99758e-07													-0.155301	8.04969e-11
Crispld1	-0.0746254	6.41006e-11	-0.0507244	0.00581468	-0.0608195	0.00279096							-0.0665642	1.54259e-17	-0.0942148	1.09968e-09	-0.0625937	0.00111399
Crk					0.072872	0.00120036							0.0531944	1.74897e-08					0.0428295	0.00127954
Crlf3	-0.125668	5.686e-07											-0.0948354	3.99607e-10	-0.199966	1.80479e-15	-0.180035	2.98234e-11	-0.121099	9.55319e-13	-0.164822	8.49976e-12	-0.192386	1.09459e-05					-0.179044	0.000710218									-0.158615	6.91013e-12
Crls1	0.0328845	0.00923112			0.0699045	0.000574758							0.0442234	4.94918e-07	0.0896577	1.01126e-06	0.0976128	1.0265e-07	0.0720691	9.5435e-07	0.11811	2.54084e-11			0.102487	0.00710825			0.156382	0.00116389									0.106302	2.2017e-09
Crnkl1	0.060699	6.84784e-06											0.0370095	6.99257e-05	0.0258411	0.00257226	0.0887998	7.12494e-06	0.0537887	5.51591e-05
Crot	-0.0806036	2.13655e-08	-0.0672978	0.001894									-0.0694192	2.55698e-13	-0.120914	1.03036e-12	-0.103945	3.22421e-07	-0.122823	1.76216e-21	-0.0994321	6.69453e-09	-0.12568	0.000906853					-0.147738	0.000338843									-0.101778	2.10018e-10
Crtap													0.0243909	0.00188285	0.0536615	9.43163e-05
Cry1	0.0621062	7.73185e-08			0.0358292	0.00540061							0.047822	4.52236e-15	0.0694282	3.15432e-08	0.0428807	0.0054525	0.0478415	3.70415e-05	0.0861345	5.12729e-09			0.0823844	0.00979596													0.085849	1.53244e-10
Cryl1															-0.0318004	0.0069878					-0.045138	0.00200293																	-0.0370581	0.00665374
Cryz	-0.0317738	0.000770668											-0.0304468	1.39336e-06	-0.0355154	0.000450136			-0.0377916	6.25682e-10																			-0.0345473	0.000986962
Cryzl1															-0.0707707	0.00287401
Cryzl2					-0.0781371	0.00703273							-0.0452726	0.000344587	-0.105562	3.87338e-07	-0.0979343	6.45826e-06																					-0.0884345	9.29266e-07
Cs													0.0306328	0.000386337
Csad																					-0.0571568	0.00585297
Csde1	0.0795389	7.51524e-05											0.0726633	3.04882e-07	0.108765	3.0994e-05	0.174771	3.11573e-14	0.103439	7.44168e-09	0.134784	7.98884e-09	0.124746	0.00813822															0.120445	1.13321e-07
Cse1l	0.0444503	0.00337528											0.0409034	5.38037e-06			0.0488372	0.00299379	0.103292	2.29599e-12
Csf2ra													0.0202288	0.00519606
Csf2rb			0.0140391	0.00747703											0.0351518	0.00585254			0.187541	5.27795e-53	0.0876686	8.84962e-10			0.0713936	0.00855813													0.0658006	1.01173e-06
Csf2rb2																			0.0830266	5.07083e-42
Csgalnact1					-0.0981462	0.00141051							-0.0678777	5.70325e-07	-0.0912062	1.58179e-05	-0.119169	5.54604e-06	-0.0517622	0.000924267																			-0.0624796	0.000231432
Csgalnact2			-0.0390809	0.00798943									-0.0277304	0.000112498					-0.0651293	6.67214e-08
Csk	-0.107456	6.38437e-06											-0.0619528	1.79329e-05	-0.0971297	0.000353094	-0.101499	0.00030889	-0.0814635	1.73756e-05
Csnk1a1	0.079514	0.0013503	0.0992174	1.06987e-05	0.0828043	0.00413927							0.081996	2.64505e-11					0.0987732	2.53923e-09
Csnk1d	0.0757395	6.748e-05	0.0763225	0.00134605	0.0827121	0.00509149							0.07518	2.27873e-10
Csnk1e					-0.0928699	0.00416078							-0.0596036	3.22156e-05
Csnk1g2													-0.0512573	0.000411396
Csnk1g3													0.0287803	0.000789182					0.0364099	0.00533863
Csnk2a2	0.0948004	1.20292e-06	0.0683797	0.00138392	0.0842603	0.000653406							0.0889272	5.92221e-16	0.111552	6.47026e-07	0.142019	3.13e-12	0.151134	1.86347e-21	0.0911138	1.34047e-05			0.169593	3.04002e-07													0.0983075	1.903e-07
Csnk2b	0.138536	1.80559e-11	0.070962	0.000577476	0.0780279	3.1649e-05							0.0996521	9.2319e-20	0.041421	0.00709827
Csrnp1	-0.0691644	2.72969e-06			-0.0907649	0.000115306							-0.0583214	1.9882e-10			-0.0512229	0.00532666	-0.0356021	0.00285664
Csrp1	-0.108125	1.0767e-07	-0.083634	0.0010901	-0.108588	3.08897e-05							-0.102867	2.57724e-16	-0.114293	1.72371e-05	-0.136096	3.1636e-06	-0.178955	8.52754e-23	-0.154933	2.11281e-09	-0.163515	0.0005697															-0.136282	1.30819e-07
Csrp2	0.169386	1.59931e-22	0.173298	6.59865e-16	0.199743	5.71017e-17							0.171278	6.08866e-52			0.0884391	0.000241692			-0.0796692	4.71722e-05
Cst3	-0.102072	8.67667e-06	-0.0806648	0.000421751									-0.0777726	5.44587e-10	-0.111213	1.64871e-07	-0.0791945	0.00147603	-0.0868872	1.07005e-05					-0.137246	0.00357841													-0.0727782	0.000908184
Cst7																					0.101272	2.37096e-05																	0.0845835	2.26294e-05
Cstb			-0.0678539	0.00260348									-0.0547689	4.48599e-06
Cstf1	0.0181358	0.00626508											0.018808	3.44671e-05
Cstf2	0.0401117	0.000103368											0.0228716	0.000106295					0.0686779	4.80215e-07
Cstf3													0.006862	0.00671634			0.0492028	0.00600022
Ctbp1																			-0.0529369	0.00475576
Ctbp2																					0.0652024	0.000153041																	0.0514379	0.00242746
Ctbs	-0.0249325	0.00622044											-0.0199228	0.00226707	-0.0394946	0.00010875	-0.0320141	0.00455839																					-0.0284729	0.00493247
Ctc1	-0.0370949	0.00129434											-0.0239625	0.00196216
Ctcf																	0.0749045	0.00199083	0.0667621	9.67394e-06
Ctdnep1	0.0525855	0.000263369	0.0810377	0.00117329	0.0674314	0.0025271							0.0680549	5.82227e-11			0.092955	0.000150066	0.035561	0.00164128
Ctdp1													0.023458	3.39164e-05	0.036121	2.49947e-06			0.0614829	9.5659e-12	0.0575746	6.386e-08																	0.0518401	8.399e-07
Ctdsp1																					-0.0714085	5.78422e-05																	-0.0555322	0.0025188
Ctdsp2	-0.0593033	0.000882527											-0.0616847	1.59025e-07	-0.120452	6.13629e-11	-0.120597	3.65404e-08	-0.140547	1.38534e-22	-0.139621	5.98651e-15			-0.0888885	0.00248333	-0.137104	0.00829384	-0.273308	1.19235e-07									-0.141965	2.53335e-16
Ctdspl	-0.0797292	9.75133e-10			-0.0701987	6.68089e-05							-0.0694591	3.45225e-16			-0.0838463	0.000275171			-0.0616572	0.00162386																	-0.051861	0.00879574
Ctdspl2																			0.0563143	0.000107147																			0.0605909	0.0084391
Ctf1													-0.0288232	0.000160581	-0.0290375	0.000105862			-0.0218555	0.00165669
Ctla2a															-0.205939	4.53522e-17	-0.107443	0.00153736	-0.148027	3.0675e-13	-0.0954146	0.00179703					-0.193354	0.00963267											-0.157865	2.31532e-08
Ctnna1					0.0674411	0.00127417							0.0372059	0.000880967
Ctnnb1	0.0662245	0.000503313	0.110406	2.05364e-05	0.0943975	0.00110954							0.0918272	1.69721e-12			0.103152	7.03105e-06	0.0679607	4.61953e-06	0.0545436	0.0044815
Ctnnbip1													-0.0191833	0.00974058
Ctnnbl1																					0.0604983	0.00847676
Ctnnd1	0.0211071	0.000722351											0.0220903	6.54333e-05
Ctps	0.0838289	1.19765e-08	0.101641	3.79369e-16	0.106328	3.84591e-15							0.104322	1.13158e-39	0.214199	4.53377e-35	0.17197	9.69365e-18	0.170374	8.33618e-31	0.221809	4.41129e-30	0.231359	1.08659e-08	0.159257	0.000217734	0.247075	4.52064e-09	0.269286	5.35799e-12									0.229339	2.80816e-35
Ctps2															-0.0560285	0.00445213			-0.0746894	4.05497e-06
Ctr9													0.0347431	0.00205898
Ctsb															-0.0965971	0.000183967	-0.119619	4.37126e-06	-0.106353	5.59555e-09	-0.0832956	0.000470135																	-0.0797854	0.000611733
Ctsc	0.0625549	0.000172545	0.0695653	0.00947213									0.0545714	4.06448e-07	0.0327071	7.25317e-06
Ctsf					-0.0823531	0.000439601							-0.0562651	3.74509e-08	-0.0641844	1.21164e-05	-0.0510227	0.00461281																					-0.0399218	0.00100974
Ctsh																	-0.0582833	0.00316015	-0.0258961	0.00404223
Ctsl	0.0409291	0.000501729											-0.00050245	0.000168558
Ctsz	-0.115542	1.50336e-07											-0.0815035	4.03631e-10					-0.0725317	0.000149298
Cttn																			-0.050241	1.55249e-06
Ctu1																			0.0183236	0.00637846
Ctu2	0.105798	1.41932e-10			0.0599357	0.00308605							0.0747115	2.81005e-15	0.151224	5.55557e-19	0.118287	1.05596e-09	0.116887	1.7215e-18	0.164987	3.76845e-21	0.157023	2.75238e-05	0.16759	1.26813e-06	0.173763	1.10707e-05	0.173722	6.5376e-06									0.174199	1.00403e-25
Ctxn1	-0.0236949	0.000823834											-0.0155893	0.00110273			-0.0495639	0.000683136	-0.0318629	0.00391157	-0.0834497	3.5395e-07																	-0.0667512	1.39201e-05
Cuedc1	-0.0657907	0.00259958											-0.0401355	0.00256355	-0.103199	3.40426e-06	-0.0733138	0.00176024	-0.0504963	0.00223257	-0.0426365	0.00751452																	-0.060297	0.000841884
Cuedc2	-0.0857576	0.000400424											-0.0425305	0.00605472
Cul1	0.120973	8.33067e-11	0.0961492	6.34559e-06	0.160704	7.181e-09							0.126928	4.43323e-26	0.1935	3.5362e-19	0.20507	5.62728e-20	0.228803	5.20497e-43	0.141347	7.23877e-10	0.153483	0.000578641			0.218452	3.37822e-07	0.256518	9.64039e-05									0.176879	2.28982e-16
Cul2													0.0321752	1.06218e-05					0.0373821	0.00584501
Cul3															0.0662152	0.00300236			0.0633735	2.76524e-08	0.0854764	0.000809963																	0.0747963	0.00155577
Cul4a													0.03196	0.00219105
Cul4b													0.0241744	0.00386565					0.0512061	1.68986e-06
Cul5													0.0439824	4.30308e-05	0.0648259	0.00841602	0.0681678	0.00163986	0.0706727	1.44771e-06	0.0697221	0.00178087																	0.063835	0.0048401
Cul7																			-0.0140098	0.000746227
Cul9	-0.0550552	5.14212e-06											-0.0407048	1.98312e-08	-0.0424687	0.00673414			-0.03556	0.000523231	-0.0472177	0.000769034																	-0.0414708	0.00317188
Cuta	-0.066097	0.00816784											-0.0528977	0.000185302					-0.0877328	5.33634e-07
Cutc													-0.0254191	0.000841499					-0.0488208	0.000224835	-0.0631703	0.000152169																	-0.053568	0.000860587
Cux1																			-0.061312	0.0016518
Cwc15	0.114689	6.86268e-08			0.0971053	0.00108994							0.0925266	1.12339e-12
Cwc22			0.0426127	0.0092294	0.0438331	0.00255543							0.0426036	2.25322e-07	0.0409892	0.000115215	0.0530868	0.000658248	0.0897163	7.72596e-11
Cwc25															-0.0426661	0.00525894
Cwf19l1																			0.0358246	3.96198e-06
Cx3cl1													-0.0153863	0.000144496
Cxcl2																			-0.0496692	5.13978e-07
Cxcr4															0.0465868	0.00272747	0.0488124	0.00627297											0.148751	0.00382909
Cxxc5													-0.0262325	0.00314259
Cyb561d2																					-0.0251321	0.00543414
Cyb5a	-0.163039	2.02009e-11	-0.12251	9.08811e-07	-0.152771	1.07186e-07							-0.152409	5.13413e-28	-0.139908	2.75414e-08	-0.135765	1.06207e-07	-0.106687	1.14767e-09	-0.149603	3.67192e-11	-0.178136	1.39208e-05															-0.144033	7.30396e-11
Cyb5b	0.0530614	0.00148913											0.0390399	2.13826e-05	0.0637272	0.000142308	0.0674483	0.00701919	0.0750997	5.47967e-06	0.0884885	0.000101309	0.102199	0.00376935															0.101318	6.1897e-07
Cyb5r1																			0.0371042	0.00810749	0.0559674	0.00171353
Cyb5r3	-0.0734288	7.36602e-05											-0.0436913	0.000183397					-0.076615	4.77141e-06
Cyb5r4													0.0368513	8.44255e-05
Cyba	-0.176802	1.53496e-13	-0.152529	1.5108e-09	-0.167958	5.38745e-09							-0.162192	1.95959e-32	-0.13007	1.03681e-07	-0.121607	2.17128e-08	-0.114768	6.77939e-09
Cyc1	0.118361	6.10665e-10	0.0825171	2.48125e-06	0.0765722	0.000107804							0.100817	8.52215e-23	0.1704	1.14137e-18	0.159405	3.80942e-13	0.0489449	0.00182308	0.074833	3.33436e-05					0.169835	3.40097e-05	0.119561	0.00228739									0.116358	3.95754e-11
Cycs	0.220166	1.22001e-25	0.198808	1.44674e-21	0.171528	4.19524e-13							0.215723	3.06894e-66	0.287292	4.56022e-35	0.238339	9.79833e-22	0.176361	2.52756e-20	0.264277	3.65378e-29	0.194218	4.92315e-07	0.214659	8.71937e-07	0.213613	1.60061e-06	0.371564	4.88623e-09									0.248375	6.8333e-28
Cyfip1	-0.0533434	0.00941588											-0.0357179	0.00413153
Cyfip2	-0.0749671	0.000115775											-0.0535653	1.3736e-05	-0.107623	2.45906e-05	-0.140526	5.69859e-09	-0.0653953	0.000550098																			-0.0757701	0.00259096
Cyhr1													-0.0340359	0.002132
Cyld																					-0.0672985	4.48394e-05
Cyp20a1																			0.0407868	0.00080756
Cyp26b1			-0.0721579	0.000239059	-0.0527439	1.62523e-05							-0.0495302	2.1951e-14
Cyp2j6	-0.082331	1.44125e-08	-0.072483	0.000704829	-0.0759213	0.000149234							-0.0805244	3.82497e-18	-0.118109	4.91913e-13	-0.105364	1.61894e-08	-0.054637	1.65923e-08	-0.0853961	1.37591e-11							-0.105049	0.00177884									-0.0871356	3.88375e-12
Cyp2j9	-0.0350503	0.000587204			-0.059374	0.000295048							-0.0486462	8.25263e-13	-0.100018	2.32054e-15	-0.0626394	4.96057e-06	-0.0388025	8.74164e-08	-0.0694869	4.83579e-12	-0.0743613	0.00120402	-0.0494747	0.0032565	-0.0914139	0.00567516	-0.0770145	0.00334269									-0.075066	8.24603e-14
Cyp4f13													-0.0218544	0.00927095	-0.0508507	0.000113268	-0.0466338	0.000244708	-0.0265206	0.000122039	-0.0414387	0.000307472																	-0.0373789	0.00166385
Cyp4f16																			-0.0320917	0.000134609
Cyp4v3															-0.0387768	0.00245499
Cyp51	0.0411229	2.4765e-05			0.0558787	0.0067158							0.0343866	2.25118e-08	0.150598	7.02647e-19	0.145514	1.92165e-14	0.150615	5.54737e-32	0.147713	4.25557e-21	0.186288	1.14983e-06	0.146274	1.23549e-05	0.138957	0.00138574											0.139503	4.98767e-19
Cyp7b1	-0.0312113	0.000113057	-0.0404488	6.59449e-05									-0.0322302	4.70331e-11					-0.0301164	2.31604e-09
Cysltr2	0.0338177	0.000104779			0.0338091	0.00943144							0.0275626	8.48868e-07
Cyth1													-0.0274588	0.000126329	-0.0471447	0.00111533	-0.0491693	0.000571686			-0.05026	0.000755656																	-0.0374529	0.00770671
Cyth2	-0.0410625	0.00297357											-0.0392114	2.16001e-05			-0.0729713	0.000230094	-0.0806271	5.11016e-09	-0.0730339	0.000323751																	-0.0650395	0.000832005
Cyth3																			-0.0196163	0.00624542	-0.044037	9.47422e-05																	-0.0354868	0.0072484
Cyth4	-0.0855187	1.26173e-05	-0.0881499	0.000482722	-0.10518	0.000209288							-0.0978017	2.67953e-15	-0.0977634	9.39717e-07	-0.0945751	0.000100825	-0.0736953	5.01446e-07
Cytip													0.037273	0.00144484
Cyyr1													-0.011446	0.00348811			-0.0235748	0.00383468
D030056L22Rik													-0.0416279	5.3957e-05					0.0207223	0.00133539
D10Jhu81e													-0.0423345	0.000365831	-0.0665248	0.00853929			-0.118267	6.42331e-14
D10Wsu102e															0.0735868	0.000728427	0.0611462	0.00952911	0.12094	6.48779e-15	0.101603	3.01319e-07							0.146488	0.00920066									0.0694199	0.0016603
D11Wsu47e													0.016877	0.00504236							0.0389146	0.0027342
D130020L05Rik																					-0.0274168	0.0051169																	-0.0324979	0.000382554
D130040H23Rik													-0.0172142	0.000260532			-0.0299385	0.00166669
D17Wsu92e	0.0609534	1.53721e-05			0.0523075	0.00676929							0.0434479	1.93445e-06			0.0720135	3.18512e-05	0.0632834	4.57029e-06	0.075353	2.46818e-05																	0.0599112	0.000761011
D1Ertd622e													0.0178312	0.000821819	0.0703183	2.94902e-06	0.0453315	0.0052847			0.0895017	1.80553e-14	0.0708202	0.00807715	0.0959024	3.66544e-05			0.0287164	0.00988779									0.0760163	2.59008e-10
D2hgdh	-0.0332827	0.00225023											-0.0289874	1.19691e-05							-0.0327689	0.00405291							-0.0569232	0.00612263									-0.0371559	0.000602731
D3Ertd751e	-0.0296867	0.00409258	-0.0680645	0.000153612	-0.056481	0.000908049							-0.0524363	3.34302e-12	-0.0493876	8.05098e-06	-0.0626735	1.15055e-05
D430042O09Rik															-0.0585604	0.000359856					-0.0579426	0.000124733																	-0.0525076	0.000179649
D5Ertd579e	0.0692386	7.59357e-06											0.0435796	1.94411e-06
D5Ertd605e															-0.0439724	0.000214254	-0.0321278	0.00693217			-0.0607701	0.000573204	-0.0958735	0.00886559															-0.053144	0.000863081
D630039A03Rik	-0.0528237	4.06568e-10	-0.0672845	3.00053e-06	-0.0463209	0.000288528							-0.0567764	4.12225e-22			-0.0604024	3.14651e-09
D630045J12Rik																					0.0264426	0.000208806																	0.0213898	0.00401412
D6Wsu163e																					-0.0249485	0.00462351
D730003I15Rik					-0.0425356	0.00439222
D8Ertd738e					-0.0712827	0.00498122													0.0721523	7.95149e-06
D930016D06Rik													0.0121707	0.00670556
Dab2ip	-0.0821272	2.30363e-09	-0.0677758	0.000663784	-0.0558876	0.00267616							-0.0715541	1.85927e-17	-0.0493575	0.00737132	-0.0701021	0.000157186	-0.0322959	0.00746163
Dach1	-0.0779415	8.20553e-07	-0.0806748	0.00117657									-0.0781551	5.27888e-13	-0.11172	1.21095e-07	-0.0938848	0.00059659	-0.106392	2.7705e-09	-0.0534715	0.000283712			-0.0545712	0.00983794													-0.0742135	9.67542e-06
Dad1	0.160474	1.31359e-19	0.07087	0.000384897	0.132924	3.84742e-10							0.126132	9.02773e-36	0.2075	2.36148e-29	0.109131	9.61874e-10	0.0997007	3.15199e-13	0.127219	3.78764e-11					0.190866	3.55492e-06	0.174296	0.000728057									0.14274	5.85562e-15
Dand5																			-0.0215517	8.85443e-05																			-0.0222138	0.00912631
Dap													-0.0438876	0.00148764	-0.159963	1.72929e-09	-0.111863	5.4798e-05	-0.147594	3.7511e-14	-0.188534	2.29041e-15	-0.189926	2.80864e-05					-0.247295	9.64039e-05									-0.17153	1.18727e-13
Dapk3													0.0411264	1.67564e-05			0.0495682	0.00266555
Dapp1			-0.106289	0.000186883	-0.15556	1.19565e-06							-0.107923	1.88515e-12	-0.159448	4.99122e-12					-0.0972472	0.000749577					-0.172889	0.000668508											-0.124492	3.32998e-07
Dars2	-0.0250841	0.00442856			-0.0333372	0.00326319							-0.0281209	2.56994e-08					-0.0330276	0.00974072
Daxx													0.0262815	0.00328673
Dazap1	0.0795412	0.000581759	0.0669614	0.00275865									0.0735764	3.08849e-09	0.0778955	0.00232797	0.148687	3.24991e-08	0.0558114	0.00451918	0.0918726	1.21589e-05																	0.0940935	2.21905e-06
Dazap2															-0.0857584	9.89491e-05			-0.0647981	0.000216778	-0.0839143	0.00119198																	-0.0845437	0.000524239
Dbf4													0.023747	0.00670183			0.0772169	0.00145573	0.110687	1.19206e-08
Dbi	-0.106133	1.53828e-05	-0.0817445	0.00084278									-0.0780091	3.67991e-08							-0.0889647	3.49753e-05	-0.0719625	0.00531402															-0.0658523	0.000941693
Dbnl													0.0324492	0.000719148
Dbp	-0.0445368	0.000197292											-0.0382621	1.92316e-06					-0.0275496	0.00626874
Dbr1																			0.0177221	0.00870843	0.0674377	0.000127811																	0.042487	0.00895879
Dbt					-0.0383851	0.00847474															-0.0403007	0.00162617
Dcaf1															0.0726969	1.90349e-05	0.0510019	0.00842649	0.0883839	4.78726e-13	0.0624704	0.00173985					0.130379	0.00259353											0.0827142	2.68707e-06
Dcaf10					0.057263	1.96672e-06							0.029544	2.29921e-06
Dcaf12																					-0.0618554	0.00103551
Dcaf13	0.0810531	8.06306e-07	0.0533584	0.00219939									0.0601065	1.12757e-09	0.125122	6.45813e-11	0.100329	8.68164e-07	0.0976498	3.20393e-10	0.125417	1.08189e-09	0.142744	0.00125749					0.153327	0.00872474									0.117659	6.45333e-10
Dcaf17													-0.0376737	0.000372947					-0.045795	0.000953379	-0.0723818	2.6321e-05	-0.104753	0.00457082	-0.0540138	0.00310986													-0.0639272	0.000150111
Dcaf4	-0.0370194	0.000894913			-0.0508023	0.00406339							-0.0389047	3.6382e-08	-0.0402625	0.00780638
Dcaf5													0.0224952	0.0077949
Dcaf7													0.0301849	0.00160718
Dcaf8																			-0.0712453	2.9141e-05
Dck	-0.0246362	0.000626649											-0.021819	6.16234e-06					-0.0594193	3.69967e-06	-0.0517501	0.000311016							-0.106354	0.00143268									-0.0356388	0.00843425
Dcp1a													0.0156754	0.00828684
Dcp1b																	-0.040053	0.0045913
Dcp2															0.0588478	3.49699e-06			0.0355193	0.00323545																			0.0559562	0.000793922
Dcps													-0.027378	0.00523203					-0.0866309	2.04121e-06
Dctd															0.0718199	0.000913329			0.0756863	1.94343e-05	0.13953	2.45274e-12	0.163882	0.00068354	0.126813	0.00188011			0.093409	0.00254703									0.106526	4.01925e-09
Dctn1																			0.0268505	0.00184232	-0.0182251	0.00647445
Dctn2	0.0757815	0.000541327											0.0332784	0.000557965	-0.0951315	0.000291207
Dctn5																			-0.0352316	0.00963333	-0.0535999	0.00340245
Dctpp1			0.0860141	1.5727e-05	0.135743	1.39417e-10							0.105379	2.39467e-14	0.296863	3.83593e-34	0.222203	1.97136e-16	0.141059	1.04179e-12	0.271818	1.26493e-26	0.247664	2.04019e-13	0.14302	0.000238895	0.20653	1.69001e-06	0.3205	8.38664e-10									0.263589	2.77316e-28
Dcun1d1	-0.0938015	0.000354896	-0.098983	0.000679036									-0.091336	5.79365e-10	-0.169809	7.03141e-13	-0.136011	2.9861e-06	-0.0894397	5.26047e-06	-0.164252	6.11991e-13	-0.220379	1.67942e-07			-0.240243	1.80244e-07											-0.182693	1.46701e-17
Dcun1d2															0.0387025	0.00109892			0.026811	0.0026855
[truncated: 5,793 more rows]

## Sheet: indo
primerid	logFC_HSC_Metabolism	adj_p-value_HSC_Metabolism	logFC_HSC_Quiescent	adj_p-value_HSC_Quiescent	logFC_HSC_Activated	adj_p-value_HSC_Activated	logFC_HSC_Interferon	adj_p-value_HSC_Interferon	logFC_HSC_Acute-Activation	adj_p-value_HSC_Acute-Activation	logFC_HSC_Cell-cycle	adj_p-value_HSC_Cell-cycle	logFC_HSC_pooled	adj_p-value_HSC_pooled	logFC_MPP0_surface	adj_p-value_MPP0_surface	logFC_MPP1_surface	adj_p-value_MPP1_surface	logFC_MPP2_surface	adj_p-value_MPP2_surface	logFC_MPP3/4_surface	adj_p-value_MPP3/4_surface	logFC_LSK_Primed	adj_p-value_LSK_Primed	logFC_LSK_Metabolism	adj_p-value_LSK_Metabolism	logFC_LSK_Primitive	adj_p-value_LSK_Primitive	logFC_LSK_Cell-cycle	adj_p-value_LSK_Cell-cycle	logFC_LSK_Acute-Activation	adj_p-value_LSK_Acute-Activation	logFC_LSK_Interferon	adj_p-value_LSK_Interferon	logFC_LSK_Interferon cell-cycle	adj_p-value_LSK_Interferon cell-cycle	logFC_LSK_Myeloid	adj_p-value_LSK_Myeloid	logFC_LSK_pooled	adj_p-value_LSK_pooled
[truncated: 971 more rows]

[truncated: 1 more sheets: pIC]
