# Supplementary material for: External signals regulate continuous transcriptional states in hematopoietic stem cells
Source: eLife. 2021 Dec 23;10:e66512. doi: 10.7554/eLife.66512 (PMC8700284; doi:10.7554/eLife.66512)
Supplement: Supplementary file 8. — Count normalized and log transformed UMI counts were averaged across cells in HSC clusters for differentially regulated genes from model-based analysis of single-cell transcriptomics (MAST). [file elife-66512-supp8.xlsx]

## Sheet: dmPGE2_1.5
	GCSF_Activated	GCSF_Cell-cycle	GCSF_Interferon	GCSF_Metabolism	GCSF_Quiescent	ct_Activated	ct_Cell-cycle	ct_Interferon	ct_Metabolism	ct_Quiescent	dmPGE2_Activated	dmPGE2_Acute-Activation	dmPGE2_Metabolism	dmPGE2_Quiescent	indo_Activated	indo_Acute-Activation	indo_Cell-cycle	indo_Interferon	indo_Metabolism	indo_Quiescent	pIC_Activated	pIC_Cell-cycle	pIC_Interferon	pIC_Metabolism	pIC_Quiescent	specific
2010107E04Rik	0.83453	1.12361	0.680327	0.915227	0.778741	0.82035	1.17484	0.802938	0.962737	0.795334	0.888898	1.06201	1.17528	1.26373	0.728269	0	1.029	0.697763	0.880517	0.712863	1.07406	1.85612	0.926285	1.15372	0.974234	HSC_only
Ablim1	0.175868	0.0662992	0.259808	0.129392	0.212917	0.162986	0.0374465	0.0513667	0.117769	0.178145	0.477809	0.594461	0.396176	0.346944	0.165665	0	0.058801	0.0717333	0.110695	0.163702	0.25208	0	0.116154	0.16448	0.230893	HSC_only
Apoe	1.80543	1.84366	2.01533	1.74786	1.86955	1.97542	1.79715	1.72788	1.87022	2.05675	1.82577	1.95019	1.55934	1.55502	1.93232	3.07917	1.68905	1.96393	1.84508	1.96774	1.58742	1.95708	1.59904	1.69289	1.73998	HSC_only
Arpc3	1.58094	1.59663	1.63793	1.49668	1.40341	1.53222	1.52145	1.52387	1.47395	1.38381	1.86899	2.08143	1.93184	2.10898	1.58807	0.953743	1.60433	1.39665	1.53186	1.43929	1.46379	1.40947	1.27705	1.468	1.31306	HSC_only
Car2	1.98788	2.26246	1.71721	2.13175	1.96612	2.11971	2.58644	2.04125	2.19664	2.14236	1.9874	1.8013	1.98956	1.37646	2.11506	1.75548	2.6196	2.00594	2.14798	2.14575	1.95225	2.6986	2.15614	2.05568	2.02759	HSC_only
Cbfa2t3	1.19369	0.849321	0.877288	1.0914	1.1714	1.03245	0.803054	0.790762	0.964528	0.997373	0.76944	0.53044	0.71598	0.549165	1.00043	0	0.790989	1.05965	0.91858	0.986751	1.03406	0.810381	0.242913	1.00418	1.1077	HSC_only
Cdk17	0.414731	0.280697	0.285147	0.349609	0.323406	0.366198	0.373123	0.303565	0.349878	0.310903	0.767179	0.74408	0.797895	0.632881	0.399648	0	0.382134	0.182983	0.348062	0.322729	0.500549	0	0.323335	0.485443	0.349177	HSC_only
Cdkn2d	0.376254	0.676999	0.514923	0.286141	0.352372	0.452982	0.66648	0.476455	0.358912	0.354631	0.669672	0.59853	0.626927	0.843468	0.488303	0	0.608135	0.384568	0.383294	0.364819	0.413918	0.697248	0.412407	0.410144	0.391271	HSC_only
Clec2d	0.43156	0.41225	0.942366	0.553851	0.689172	0.592131	0.535059	1.11399	0.827253	0.963021	0.372221	0.235292	0.268397	0.338933	0.513572	1.75548	0.397018	1.12862	0.758473	0.947879	0.922854	1.04192	1.55312	1.11406	1.21917	HSC_only
Dapp1	0.813802	0.929259	0.765823	0.974395	0.90814	0.965891	0.945942	0.900649	1.04689	1.03251	0.767233	0.525828	0.813752	0.604634	0.917055	0	0.811036	0.987299	1.01297	1.04638	1.05941	1.39239	1.12868	1.10308	1.09623	HSC_only
Ddx6	0.674151	0.751213	0.687838	0.648093	0.665549	0.542079	0.603827	0.500964	0.558097	0.496825	0.815588	0.786272	0.742229	0.984788	0.535935	0	0.675272	0.629311	0.554399	0.565967	0.754541	1.15505	0.617164	0.645791	0.65546	HSC_only
Dusp2	1.10478	0.470585	0.99128	0.740354	0.712915	1.28485	0.531882	0.651402	0.879669	0.897123	1.81026	1.93384	1.59146	1.87615	1.28052	2.35825	0.572536	0.762904	0.847036	0.780421	1.07453	0.208001	0.973748	0.746142	0.711859	HSC_only
Dut	0.413746	1.54755	0.314594	0.631512	0.37281	0.455548	1.63793	0.294696	0.828837	0.437054	0.330664	0.381289	0.611766	0.447865	0.443237	0.953743	1.62853	0.342332	0.753788	0.412097	0.362511	0.949168	0.337055	0.61464	0.438999	HSC_only
Dynll1	0.819573	1.72104	0.789967	1.12609	0.791724	0.648234	1.42002	0.585736	0.859376	0.592439	0.555628	0.390898	0.652015	0.30734	0.658699	1.43289	1.42884	0.661509	0.863142	0.620858	0.574757	1.04192	0.607807	0.722961	0.514387	HSC_only
Dyrk3	0.255328	0.177555	0.376882	0.16966	0.137033	0.271293	0.272478	0.348326	0.172838	0.114983	0.760391	0.661362	0.722569	0.584375	0.315808	0	0.276484	0.43002	0.208077	0.125649	0.446308	0	0.906086	0.269268	0.195464	HSC_only
Eef1g	1.90081	2.14386	1.92806	2.12701	1.89652	1.92384	2.174	1.95618	2.17848	1.98221	1.71519	1.82742	1.9315	1.51366	1.90334	2.19467	2.10325	1.8264	2.14961	1.94594	1.77421	2.34868	1.71252	1.99403	1.81609	HSC_only
Egfl7	0.645491	0.82576	0.578453	0.63394	0.665004	0.599201	0.779981	0.478385	0.703109	0.67347	0.853709	1.10171	0.7899	1.23919	0.675666	1.43289	0.9255	0.725077	0.709072	0.680773	0.603668	0.559788	0.399547	0.63284	0.660034	HSC_only
Eif1	3.12111	2.95794	3.03553	3.05281	2.97231	3.00244	2.85062	2.80436	2.81719	2.80624	3.15086	3.1843	3.04269	3.23693	3.01011	2.83051	2.86936	2.71759	2.79607	2.78113	2.88687	2.67518	3.00556	2.75462	2.7508	HSC_only
Emp3	1.26024	1.59383	0.934539	1.32297	1.28001	1.36358	1.6384	1.24127	1.45704	1.40861	1.21477	1.12883	1.16697	1.37078	1.35996	0.953743	1.52479	1.11634	1.44815	1.38034	1.17513	1.89829	0.897573	1.40533	1.21805	HSC_only
Fam107b	0.642009	0.569466	0.627048	0.635607	0.629912	0.855199	0.737615	0.458442	0.779426	0.773631	1.27549	1.0759	1.06431	0.802121	0.906231	0.953743	0.795026	0.738853	0.820204	0.841134	1.02627	1.01185	0.613131	0.792379	0.763495	HSC_only
Gimap6	0.976804	0.608044	0.882174	0.687684	1.10883	1.37876	0.833444	1.44956	1.16161	1.48993	1.11609	0.844766	0.84806	0.777958	1.39341	0	0.804936	1.30971	1.13233	1.47343	1.23676	1.09756	0.708089	1.08902	1.42904	HSC_only
Glul	1.13257	0.609285	0.924757	0.977909	1.16379	0.998196	0.602195	0.819222	0.763189	1.02054	1.35904	1.32438	1.09144	1.37809	1.06243	0	0.579556	0.86062	0.819139	1.05659	1.36784	1.45171	1.39592	1.00947	1.39187	HSC_only
Gm11808	0.420829	0.382683	0.596773	0.429096	0.417736	0.457194	0.474185	0.413039	0.453106	0.453059	0.817879	0.805618	0.839005	0.575985	0.428851	0	0.580169	0.443047	0.452842	0.441972	0.667775	0.980396	0.688688	0.766703	0.793176	HSC_only
Gm19590	0.505075	0.275214	0.312922	0.448742	0.526212	0.785182	0.429513	0.410748	0.706312	0.758166	0.6514	0.390477	0.528092	0.287964	0.807315	0	0.531427	0.530095	0.737358	0.831283	0.806207	1.00666	0.259514	0.704883	0.686959	HSC_only
Hes1	0.792297	0.404446	0.463718	0.328981	0.1858	1.28048	0.6225	0.670506	0.564731	0.273884	0.515364	0.334575	0.434287	0.586063	1.49546	0	0.573621	0.617222	0.661764	0.266043	0.984135	0.637604	0.516416	0.41483	0.311957	HSC_only
Hk2	0.339886	0.213015	0.326862	0.308672	0.236713	0.117613	0.114586	0.157817	0.143317	0.0949539	0.48087	0.735785	0.715794	0.333876	0.117137	0	0.0688058	0.126382	0.130437	0.0848475	0.354122	0	0.836987	0.311403	0.16067	HSC_only
Hmgb2	0.741438	3.14448	0.860395	0.76197	0.626543	1.0605	3.12295	0.711912	1.07451	0.94439	1.48325	1.3001	1.45073	1.14663	1.04128	0.953743	3.10666	0.692162	1.01652	0.929328	1.05427	3.19989	0.741663	0.94624	0.927339	HSC_only
Hsd17b10	1.02868	0.914948	0.814429	1.11598	0.946774	0.966303	0.947506	0.894588	1.12026	0.983046	0.621708	0.771387	0.795389	0.486665	1.04356	1.75548	0.972665	0.914581	1.18878	1.04961	0.884875	0.208001	0.848793	1.0325	0.947091	HSC_only
Hspa4	0.806952	0.928611	0.886472	0.989008	0.642758	0.586172	0.808347	0.602394	0.694344	0.447821	1.05109	1.19483	1.12364	0.916594	0.603309	0	0.750658	0.411873	0.711001	0.453174	0.578352	0.898713	0.589939	0.674682	0.533375	HSC_only
Ier3	0.893059	0.401935	0.513709	0.380092	0.338221	1.103	0.599321	0.724251	0.51895	0.467245	0.564021	0.37404	0.490381	0.220444	1.04407	0	0.685346	0.517937	0.549205	0.378374	1.02355	1.62175	0.967125	0.586877	0.439636	HSC_only
Irf2bp2	0.375592	0.409142	0.378064	0.381364	0.333764	0.404484	0.265643	0.473187	0.39944	0.34947	0.804142	0.632758	0.775953	0.517595	0.423148	0.953743	0.32493	0.286193	0.414099	0.381303	0.524517	0.354456	0.73964	0.439866	0.334629	HSC_only
Khdrbs1	0.727832	1.12326	0.699451	0.814553	0.661325	0.607977	0.89904	0.73319	0.723495	0.532159	0.77188	0.761064	0.824631	0.997541	0.63165	0.953743	0.818076	0.771938	0.711228	0.554726	0.789342	0	0.744291	0.745112	0.635831	HSC_only
Maff	0.319504	0.041066	0.124856	0.134936	0.111865	0.430882	0.0981741	0.237819	0.186247	0.178255	0.814127	0.550876	0.532436	0.43567	0.435473	0	0.18447	0.210479	0.195144	0.140079	0.381067	0.208001	0.583288	0.21653	0.19093	HSC_only
Man2a2	0.279816	0.176855	0.184911	0.251528	0.234682	0.308762	0.215768	0.172126	0.25894	0.214212	0.732963	0.638536	0.680061	0.659296	0.314773	0	0.201217	0.0797948	0.270372	0.220146	0.338655	0.559788	0.150095	0.308474	0.234573	HSC_only
Mcm3	0.340386	1.10045	0.258102	0.563172	0.285778	0.340394	1.19772	0.439877	0.694145	0.292894	0.353678	0.258759	0.526303	0.210984	0.326646	0	1.20201	0.208543	0.648998	0.278307	0.262928	0.817272	0.307868	0.505243	0.274299	HSC_only
Mcm6	0.382768	0.999547	0.377505	0.612488	0.298807	0.3417	1.11856	0.416545	0.70981	0.309936	0.294896	0.241708	0.423296	0.273021	0.360691	0	1.11843	0.398434	0.683454	0.329647	0.262076	1.29196	0.368864	0.586825	0.239702	HSC_only
Mef2c	1.2644	1.12194	1.18814	1.13415	1.14295	1.22598	1.2441	1.29013	1.10956	1.14419	1.74468	1.75501	1.66142	1.65156	1.27281	1.43289	1.11778	1.24606	1.13223	1.15995	1.49758	1.10405	1.20734	1.27223	1.3651	HSC_only
Mif	1.55155	1.65858	1.73284	1.99946	1.35384	1.33358	1.79945	1.65146	1.89161	1.18636	1.00776	1.28622	1.65115	0.870726	1.34088	1.99899	1.69857	1.5394	1.90534	1.19537	1.19601	0.559788	1.43823	1.63749	1.09517	HSC_only
Mindy1	0.301349	0.187205	0.347249	0.245034	0.258807	0.287013	0.141347	0.244926	0.221839	0.252067	0.673479	0.749448	0.601695	0.65504	0.294592	0	0.143393	0.228526	0.190494	0.226598	0.228477	0.208001	0.161565	0.258361	0.2853	HSC_only
Mplkip	0.448682	0.541964	0.338268	0.501431	0.454124	0.455189	0.594353	0.250644	0.518795	0.464198	0.319064	0.254638	0.398032	0.0599934	0.459797	0	0.566385	0.360454	0.51988	0.473024	0.490405	0.90258	0.282256	0.542742	0.480876	HSC_only
Mrpl18	0.488762	0.972898	0.495436	0.638879	0.462336	0.403494	1.03964	0.547179	0.644683	0.41533	0.307898	0.274984	0.35675	0.240298	0.397703	0	0.991698	0.554214	0.577978	0.418764	0.299094	1.15505	0.233115	0.568063	0.413217	HSC_only
Myb	0.993572	0.908463	0.971513	1.17164	0.947974	0.774282	0.965715	0.68792	0.839639	0.760963	0.56392	0.303333	0.659508	0.279367	0.770775	0	0.808724	0.664098	0.836756	0.770342	0.768474	0.704924	0.287411	0.895284	0.844823	HSC_only
Mycn	0.543122	0.436337	0.598419	0.710717	0.681342	0.502587	0.473424	0.530974	0.70806	0.645847	0.124717	0.177851	0.237706	0.197935	0.433188	0.953743	0.316858	0.357289	0.629152	0.585395	0.657255	0.467589	0.467689	0.779006	0.644136	HSC_only
Nceh1	0.574109	0.356219	0.527477	0.385122	0.574151	0.769267	0.507366	0.901657	0.563361	0.719814	1.18058	0.957936	0.944447	1.10869	0.740585	0.953743	0.407241	0.754067	0.523012	0.725424	1.07455	0.798655	1.31102	0.712582	0.88415	HSC_only
Nr4a1	1.05551	0.312574	0.400126	0.404212	0.194064	1.41191	0.705416	0.756426	0.664099	0.404082	0.977304	0.375041	0.578414	0.363093	1.46967	0.953743	0.909603	0.631449	0.651546	0.292522	1.15198	0.637604	0.259816	0.301274	0.205647	HSC_only
Nr4a2	0.766764	0.377386	0.450687	0.299687	0.148279	1.07706	0.460817	0.426806	0.516557	0.300811	0.401825	0.25939	0.389944	0.131408	1.1012	0	0.608636	0.522959	0.553259	0.222836	0.814295	1.24918	0.202025	0.355579	0.217124	HSC_only
Nrgn	1.1376	1.30833	1.03132	1.24141	1.16039	1.24912	1.55959	1.05767	1.36145	1.2388	1.09544	1.12884	1.11813	0.903878	1.32327	1.75548	1.43027	1.21201	1.427	1.35688	1.34523	1.45321	1.13413	1.42117	1.27114	HSC_only
Nt5c3	0.835536	0.877923	1.0703	0.849424	0.832692	0.734082	0.830993	0.934422	0.732642	0.740031	0.39762	0.420169	0.516026	0.343263	0.765364	0.953743	0.93077	1.0857	0.793987	0.840849	0.90089	0.559788	1.52039	0.924769	0.931466	HSC_only
Osbpl9	0.488235	0.439934	0.761319	0.445526	0.461124	0.420572	0.450788	0.500363	0.374865	0.424344	0.726415	0.746447	0.792752	0.651086	0.443399	0	0.480717	0.600608	0.404484	0.418387	0.567932	0.208001	0.642389	0.492685	0.452095	HSC_only
P2rx4	0.43956	0.21259	0.262636	0.305884	0.345385	0.397472	0.186162	0.330351	0.308408	0.360074	0.665179	0.738446	0.667914	0.769195	0.418678	0	0.193565	0.375954	0.326526	0.340752	0.557092	0	0.458079	0.351685	0.405327	HSC_only
Pdcd6	0.855755	0.928625	0.686227	0.902167	0.812066	0.863316	0.756195	0.726327	0.869701	0.80909	1.11601	1.19757	1.21177	1.13499	0.831781	1.75548	0.85842	0.847822	0.864624	0.784559	0.703144	1.01185	0.690045	0.874265	0.755886	HSC_only
Pde4d	0.124879	0.0878761	0.163102	0.0899259	0.166346	0.167684	0.0937442	0.164592	0.119584	0.184966	0.636925	0.554765	0.54333	0.694577	0.170933	0	0.119414	0.124696	0.121069	0.18577	0.236605	0.208001	0.128227	0.152551	0.247615	HSC_only
Pim3	0.319017	0.119193	0.135547	0.198435	0.214272	0.426158	0.215942	0.299557	0.259769	0.217627	0.695344	0.70356	0.63168	0.580623	0.393796	0	0.184072	0.168631	0.26627	0.197112	0.362242	0.342792	0.396319	0.202998	0.259777	HSC_only
Pnp	1.16868	1.31136	1.70539	1.33434	1.2864	1.0464	1.19769	1.45773	1.26598	1.1799	0.855085	0.813916	1.007	0.681158	1.04293	0	1.13937	1.48582	1.17967	1.12586	1.31971	1.10405	2.3259	1.40418	1.3436	HSC_only
Ppp1r15a	1.30316	0.530296	1.27047	0.795471	0.88886	1.36764	0.686442	0.862954	0.897982	0.961515	0.938525	0.686041	0.653739	0.652404	1.49395	1.43289	0.736387	1.06924	0.962327	0.989089	1.18794	1.44935	0.900011	0.928227	0.850464	HSC_only
Prdx6	1.86668	1.62654	1.78566	1.878	1.69851	1.89036	1.70033	1.50756	1.88941	1.65622	2.09285	2.18995	2.12865	2.1264	1.90969	2.35825	1.57844	1.73859	1.90732	1.65341	1.7539	1.61593	1.64913	1.79598	1.64341	HSC_only
Prkar1a	0.799693	0.842727	0.832575	0.816235	0.761797	0.722988	0.752763	0.65244	0.762478	0.675452	1.10003	1.06937	1.06216	0.905914	0.794838	1.43289	0.838284	0.743445	0.793797	0.713427	0.798777	1.18186	0.72118	0.842283	0.791488	HSC_only
Prtn3	1.70889	1.22472	1.60794	1.63995	1.5501	1.36134	0.791517	1.16572	1.15616	1.31128	1.08537	1.02895	1.0034	0.9529	1.36058	0	0.730728	1.30934	1.18548	1.32297	1.3447	0.342792	1.1815	1.20856	1.22808	HSC_only
Ptp4a2	1.07315	1.27068	1.07407	1.08889	1.03939	1.06269	1.19062	1.08801	1.09282	1.03307	1.23896	1.30811	1.22093	1.57012	1.05774	0.953743	1.07628	0.945928	1.06047	1.02023	1.23072	1.04772	1.02595	1.14379	1.1064	HSC_only
Rab38	1.15305	1.09104	1.48099	1.14359	1.21778	1.01192	0.986466	1.179	1.02284	1.0874	0.784449	0.661536	0.867511	0.53934	1.07046	0.953743	0.972464	1.28988	1.01665	1.1354	1.02597	0.90258	0.932043	1.05197	1.17036	HSC_only
Ran	1.65675	2.47536	1.8266	2.10941	1.49471	1.33177	2.54816	1.33683	1.915	1.25618	1.24096	1.31982	1.7079	1.17388	1.32797	1.99899	2.4842	1.40166	1.86611	1.27668	1.08105	2.26856	1.23437	1.6174	1.13113	HSC_only
Rgs2	0.95939	0.553475	0.552971	0.468208	0.292418	1.17323	0.64487	0.725504	0.603813	0.431729	0.708095	0.490108	0.609155	0.35595	1.2299	1.43289	0.713434	0.562344	0.652802	0.350287	0.854098	0.550793	0.473815	0.506098	0.337915	HSC_only
Serpina3g	1.68627	1.53853	2.91008	1.72269	1.76205	1.39605	1.09155	2.77338	1.43555	1.43838	0.991058	0.896561	0.933541	0.981304	1.37573	0	0.912441	2.72928	1.3468	1.41969	1.89092	1.10405	4.31133	1.86362	1.80292	HSC_only
Sik1	0.61317	0.164104	0.312069	0.36206	0.341197	0.721122	0.339508	0.614286	0.443122	0.407891	1.01511	0.744937	0.81423	0.879783	0.675011	0	0.413112	0.449734	0.395474	0.303226	0.913865	0	0.476105	0.486875	0.493055	HSC_only
Skil	0.82147	0.303706	0.598231	0.347561	0.167351	0.735354	0.304695	0.358118	0.338731	0.174788	1.01045	0.622089	0.790224	0.344831	0.875666	0	0.528104	0.511953	0.402928	0.191699	0.896015	0.697248	0.824052	0.358788	0.282836	HSC_only
Sla2	0.163217	0.130656	0.0653661	0.151512	0.175746	0.236251	0.20261	0.195256	0.20823	0.244195	0.639471	0.708123	0.555862	0.652896	0.240523	0	0.247192	0.197901	0.234196	0.252504	0.168312	0.354456	0.143985	0.221955	0.260719	HSC_only
Snrk	0.1583	0.157215	0.0816438	0.122748	0.15509	0.157681	0.168148	0.12664	0.148279	0.158371	0.590917	0.560655	0.463314	0.462403	0.182537	0	0.0846184	0.144338	0.139721	0.177796	0.142322	0	0.16191	0.211941	0.240103	HSC_only
St8sia4	0.336304	0.227708	0.234838	0.226972	0.420761	0.378528	0.142297	0.537684	0.222719	0.396359	0.643596	0.620822	0.474392	1.19427	0.349894	0	0.15526	0.40113	0.21964	0.34897	0.385203	0	0.54028	0.304748	0.437746	HSC_only
Stat4	0.294419	0.199067	0.267923	0.252757	0.283292	0.36021	0.311854	0.428154	0.306592	0.329916	0.756211	0.683215	0.661486	0.626519	0.375453	0.953743	0.318053	0.480281	0.308134	0.336819	0.633552	0.342792	0.430806	0.441576	0.462551	HSC_only
Stmn1	1.24173	3.21589	0.902399	1.4191	1.20895	1.47699	3.35624	1.41088	1.7795	1.41612	1.36475	1.17934	1.48584	1.01156	1.47533	1.99899	3.32377	1.19341	1.69078	1.44662	1.30754	2.91635	1.19708	1.5408	1.36913	HSC_only
Stxbp5	0.283367	0.247766	0.173989	0.245198	0.2115	0.299027	0.307416	0.382551	0.261985	0.23611	0.747272	0.690112	0.724665	0.793837	0.294521	0	0.206708	0.301445	0.269601	0.241604	0.423322	0.354456	0.412456	0.323749	0.305279	HSC_only
Tinagl1	0.259207	0.0840265	0.160422	0.14449	0.291656	0.350212	0.154198	0.300287	0.252314	0.407975	0.685001	0.734481	0.411618	0.904372	0.346374	0	0.258474	0.345193	0.244664	0.401853	0.309347	0	0.172577	0.248192	0.283683	HSC_only
Tnfaip8	1.10167	0.791907	0.894166	1.0478	1.08484	0.871183	0.787211	0.769191	0.827487	0.876172	1.14807	1.31539	1.22768	0.99287	0.909315	0	0.672064	0.872963	0.858913	0.879642	1.01891	0.752259	0.890658	0.919178	0.959139	HSC_only
Trim47	0.78416	0.367218	0.79291	0.657371	0.789538	0.691521	0.555987	0.61303	0.612827	0.783317	0.420842	0.150209	0.266449	0.191312	0.738427	0.953743	0.462855	0.599859	0.634838	0.770433	0.695026	0.550793	0.292905	0.624919	0.756498	HSC_only
Trp53	0.935069	1.17466	1.10502	1.06544	0.879359	0.84167	1.23888	0.872202	1.04225	0.829532	0.667631	0.568419	0.830248	0.621396	0.809656	0.953743	1.07706	0.775078	1.04745	0.821495	0.89893	1.32507	0.817365	1.02893	0.867583	HSC_only
Ube2e3	0.758551	0.980147	0.762712	0.719648	0.726258	0.722429	0.955445	0.715557	0.680514	0.654265	0.835671	0.762697	0.811502	1.14315	0.754914	0.953743	1.0615	0.534267	0.679589	0.696733	0.775829	0.550793	0.847496	0.744733	0.710016	HSC_only
Upp1	0.352818	0.0592928	0.353241	0.227143	0.342421	0.293118	0.107939	0.31092	0.225443	0.303743	0.774523	0.744807	0.524522	0.630537	0.322188	0	0.113988	0.455604	0.216964	0.329257	0.413036	0	0.367358	0.249052	0.332663	HSC_only
Vamp5	1.26409	1.48427	1.38687	1.50357	1.23585	1.1635	1.43914	1.28437	1.37206	1.11682	0.880511	0.773647	1.01884	0.469653	1.15087	0.953743	1.2531	0.958202	1.34707	1.11417	1.08539	1.55267	0.876001	1.24762	0.923516	HSC_only
Vamp8	1.60795	1.73927	1.53212	1.68688	1.55487	1.51299	1.74611	1.62145	1.59516	1.47151	1.39022	1.31061	1.47673	0.86548	1.51498	0.953743	1.61377	1.29902	1.62181	1.52709	1.43488	1.55267	1.39338	1.50364	1.38392	HSC_only
Vapa	0.957773	0.833116	0.855524	1.07603	0.919449	0.792647	0.844786	0.989732	0.876105	0.758966	1.10234	1.2091	1.22342	0.958154	0.816556	0	0.763876	0.811427	0.887493	0.776372	0.893751	1.15311	0.944573	0.928403	0.78366	HSC_only
Zbtb20	1.11083	0.7213	0.868342	0.937879	1.0158	1.20905	0.820094	1.02886	0.93826	1.07926	1.42904	1.40609	1.3523	1.25798	1.19941	0	0.614676	1.14726	0.983433	1.12306	1.39818	1.61593	1.25887	1.15381	1.2477	HSC_only
Anks1	0.179234	0.269195	0.192283	0.163561	0.161014	0.274727	0.18811	0.273619	0.245388	0.212413	1.01837	1.01685	1.00295	1.02128	0.239848	0.953743	0.25864	0.15154	0.267174	0.216838	0.265542	0.550793	0.150771	0.246175	0.214333	overlap
Cdkn1a	0.309815	0.148842	0.0876566	0.139386	0.0759821	0.420425	0.301908	0.19102	0.161038	0.0752911	0.797143	0.676756	0.483393	1.01525	0.406128	0	0.352234	0.224757	0.159084	0.0474915	0.327858	0	0.860277	0.124286	0.0853812	overlap
Cebpb	1.17317	0.71355	1.14598	0.83151	0.795096	1.12991	0.707277	0.983226	0.723924	0.694372	2.76741	2.5741	2.56416	2.46203	1.23487	1.43289	0.806346	0.856114	0.71904	0.638121	1.07328	0.752259	1.12316	0.745397	0.801387	overlap
Cirbp	0.929752	0.718256	0.898398	0.758688	1.02199	1.16317	0.889486	0.872686	0.968623	1.12752	1.62357	1.67721	1.44141	1.7885	1.22749	2.19467	0.94567	1.01244	1.02919	1.2118	1.22741	0.810381	0.926626	1.01613	1.31034	overlap
Cish	0.26729	0.192493	0.20349	0.181762	0.213439	0.354671	0.256208	0.400551	0.310235	0.298063	0.732199	0.715948	0.74037	0.844834	0.333562	0	0.290776	0.449504	0.280269	0.282648	0.775156	0.544258	1.59838	0.522185	0.499962	overlap
Cited2	0.779754	0.892256	1.22769	0.690212	0.932957	0.93024	0.786841	1.27651	0.859399	1.11089	0.53415	0.358525	0.369717	0.299595	0.894723	1.43289	0.897701	1.37142	0.879949	1.10284	1.77584	1.35247	3.31427	1.54732	1.61455	overlap
Ctla2a	1.95239	1.5026	1.75124	1.86484	1.3484	2.01412	1.70284	1.60911	1.89101	1.41043	3.09091	3.08716	3.4649	2.46267	1.92643	0	1.66175	1.13947	1.86885	1.33672	1.79208	1.79679	1.33409	1.7415	1.36929	overlap
Cytip	0.355872	0.341716	0.261155	0.302444	0.326067	0.301243	0.218501	0.246006	0.281497	0.283722	0.998886	0.805317	0.994272	0.795607	0.316445	0	0.251165	0.249326	0.280552	0.300751	0.556279	0.354456	0.716078	0.459238	0.335478	overlap
Ddit4	0.203878	0.195027	0.160632	0.168533	0.121616	0.227568	0.193974	0.128859	0.144064	0.138298	0.730288	0.656066	0.66324	0.682565	0.235033	0	0.193916	0.0833354	0.143377	0.120491	0.202298	0	0.0854983	0.174895	0.137743	overlap
Dennd4a	0.56018	0.239893	0.429123	0.340195	0.329516	0.714249	0.35632	0.456694	0.40286	0.380813	1.48192	1.27075	1.25066	1.30573	0.821972	0.953743	0.494436	0.447207	0.471989	0.411415	0.864573	0.889561	1.31656	0.490203	0.479605	overlap
Fbxo9	0.608149	0.367234	0.539062	0.488543	0.509121	0.644181	0.580712	0.540492	0.641889	0.596222	1.06351	1.16799	1.20285	0.904877	0.662983	0.953743	0.501919	0.593169	0.62946	0.627645	0.796993	1.35844	0.715931	0.807819	0.676799	overlap
Fos	2.53421	1.1226	2.11074	1.58779	1.48043	2.73514	1.53829	2.29869	1.91934	1.83061	1.96531	1.17407	1.52377	0.947462	3.02918	2.4988	2.08619	2.24528	2.00253	1.80801	3.21205	2.28893	2.13955	2.31893	2.35205	overlap
Fosb	1.00498	0.682231	1.07689	0.883128	0.713943	1.30899	0.989307	1.21404	1.1352	1.03848	0.498404	0.257914	0.44605	0.436392	1.76298	0.953743	1.38028	1.41439	1.4919	1.39105	1.64646	0.908949	1.52061	1.48439	1.32058	overlap
Fosl2	0.333565	0.1295	0.352735	0.167289	0.136014	0.398888	0.134958	0.279038	0.180822	0.185303	1.38305	1.08166	1.00993	0.869919	0.351455	0.953743	0.146415	0.24682	0.175627	0.148582	0.464362	0.697248	0.677738	0.239059	0.228747	overlap
Galc	0.10428	0.0435424	0.116124	0.0794994	0.103236	0.13977	0.120562	0.0339211	0.106614	0.13683	0.598464	0.510859	0.533102	0.428676	0.128367	0	0.112111	0.124892	0.101425	0.13573	0.181731	0.342792	0.0946289	0.14077	0.172682	overlap
Gimap1	0.976775	0.755656	0.721917	0.877777	1.05779	1.21114	0.99731	1.23155	1.14278	1.36592	0.80527	0.675912	0.871441	0.985471	1.16973	1.75548	0.954517	1.18206	1.11944	1.33529	1.20365	0.898713	0.761114	1.11476	1.32183	overlap
Gpr65	0.0442731	0.0107354	0.0520371	0.0674576	0.0482924	0.0612396	0.0392001	0.0557728	0.0659431	0.0600194	0.568215	0.352007	0.505824	0.339458	0.0570719	0	0.0663625	0.032722	0.0499544	0.0452675	0.222095	0	0.190557	0.153556	0.109179	overlap
Hlf	1.7378	0.919767	1.53482	1.47529	1.82558	1.72748	1.0212	1.45503	1.3663	1.74313	1.40356	1.08043	0.938671	1.38259	1.71417	1.75548	1.09692	1.51664	1.38143	1.80014	1.73755	1.24402	0.679833	1.4621	1.80656	overlap
Hnrnpdl	0.816384	0.990254	0.86931	0.954712	0.708803	0.656864	1.03142	0.849582	0.74007	0.560826	0.940931	1.12341	1.10001	0.889461	0.609371	0	0.974545	0.669168	0.727711	0.554381	0.621752	0.898713	0.7277	0.752183	0.645032	overlap
Ifngr1	0.466991	0.375507	0.470097	0.416393	0.501093	0.522892	0.4289	0.439641	0.434938	0.528582	1.41847	1.58171	1.55382	1.29529	0.527913	0	0.510315	0.542535	0.4477	0.516163	0.559505	0.810381	0.550183	0.479846	0.601952	overlap
Jun	2.42475	1.84428	2.3021	1.92526	1.90738	2.68448	2.14021	2.53338	2.19674	2.29729	1.59853	0.964785	1.31556	1.13228	2.9082	2.4988	2.48971	2.70445	2.47925	2.55504	3.03013	2.95466	3.42121	2.75219	2.74207	overlap
Klf13	0.470651	0.305988	0.486051	0.341861	0.321236	0.564726	0.350702	0.321771	0.3828	0.310195	1.15811	1.19406	1.00709	1.31288	0.607475	0	0.471887	0.447301	0.407857	0.321771	0.600997	0.467589	0.2866	0.377814	0.400088	overlap
Klf2	1.32912	0.52613	1.09239	0.54951	0.677142	1.9556	0.886983	1.22302	0.863691	0.91159	2.41859	1.8717	1.47308	2.74756	2.3092	3.58626	1.09906	1.58419	1.10697	0.966478	1.91917	0	0.5752	0.823433	1.02103	overlap
Klf6	1.14774	0.544677	1.23238	0.656854	0.744209	1.44353	0.585288	1.34147	0.867324	1.00343	1.50721	1.0934	1.2263	1.51643	1.67346	0.953743	0.91453	1.4356	1.02482	1.0405	2.06329	0.544258	2.44474	1.46317	1.48559	overlap
Klf9	0.774369	0.25547	0.562939	0.482638	0.417945	0.991896	0.37182	0.538118	0.581875	0.527973	1.29416	1.28938	1.19578	1.34782	0.992856	0.953743	0.483129	0.505899	0.573405	0.454305	1.05106	0.697248	1.02921	0.620809	0.572792	overlap
Lyl1	0.795241	0.855714	0.911623	0.90006	0.948429	0.725827	0.69782	0.660772	0.817831	0.786142	0.431085	0.327539	0.467673	0.359175	0.672748	0.953743	0.753252	0.75422	0.776886	0.799036	0.677979	1.10405	0.130207	0.780373	0.796303	overlap
Nek6	0.0757762	0.0879428	0.0889362	0.0775645	0.076662	0.0794453	0.0877056	0.0319468	0.0747945	0.0826791	0.47508	0.601211	0.506666	0.509968	0.0755686	0	0.0323805	0.0812391	0.0811902	0.085138	0.0859538	0	0.0568376	0.0601239	0.0734469	overlap
Neurl3	0.771147	0.179102	1.10852	0.379645	0.636215	1.01214	0.338832	1.0335	0.67151	0.873886	1.98881	1.66689	1.62468	2.1404	1.12252	0	0.463345	1.04106	0.658946	0.881097	1.01643	0.687464	1.58998	0.680301	0.818066	overlap
Odc1	0.602255	0.918292	0.4893	0.724165	0.429287	0.491229	0.828719	0.435986	0.598732	0.339954	0.71464	0.779578	0.97349	0.841675	0.539447	0.953743	0.918565	0.445915	0.6009	0.329388	0.464399	0.697248	0.446484	0.587739	0.403181	overlap
Pde10a	0.20732	0.0899289	0.155113	0.0786195	0.0345312	0.206979	0.15179	0.0359971	0.0928844	0.0388896	0.768576	0.819316	0.70895	0.499164	0.212493	0	0.214173	0.0599601	0.0733345	0.0235144	0.0802745	0	0.0388764	0.0498477	0.0413414	overlap
Pde4b	0.328816	0.212488	0.218794	0.233813	0.219859	0.401344	0.21791	0.445001	0.314275	0.269219	0.875689	0.684226	0.845783	0.637	0.451154	0	0.292067	0.264414	0.329517	0.311858	0.439631	0.544258	0.914021	0.276652	0.298626	overlap
Per1	0.235544	0.0963832	0.0873726	0.129406	0.117696	0.395329	0.137855	0.163943	0.2096	0.180661	1.07826	0.785583	0.746527	0.784547	0.366662	0	0.172024	0.224212	0.190758	0.151853	0.433421	0	0.273158	0.25433	0.257813	overlap
Pik3ip1	0.560358	0.26355	0.673114	0.453015	0.677467	0.851842	0.465737	0.903929	0.678514	0.988757	1.32304	1.13482	1.0948	1.22493	0.807344	0	0.305687	0.784907	0.678068	0.962797	1.08596	0.90258	0.333674	0.774313	1.03378	overlap
Plaur	0.0859457	0.0566907	0.122556	0.10049	0.0534318	0.117051	0.0811382	0.0594213	0.08916	0.0363042	1.33997	1.11205	1.06672	1.17766	0.11184	0	0.0109498	0.127913	0.0870495	0.0221608	0.117919	0	0.0417223	0.079147	0.0199354	overlap
Rgs1	1.22877	0.782136	1.31964	0.888975	0.561899	1.34399	0.923366	0.90479	0.994151	0.597668	0.727162	0.443717	1.00944	0.448801	1.31943	1.43289	0.805212	0.724861	1.00658	0.5814	1.16599	1.24109	1.45756	0.7657	0.451677	overlap
Rnf125	0.200063	0.134222	0.112751	0.180677	0.190444	0.288797	0.199495	0.271572	0.221705	0.233883	0.968442	0.897913	0.886268	0.715655	0.301621	0	0.169136	0.25048	0.213748	0.212468	0.277646	0.342792	0.0930733	0.229636	0.24584	overlap
Rsrp1	1.31598	1.16249	1.55236	1.28614	1.52434	1.29883	1.18799	1.37096	1.29883	1.5439	0.84935	0.836684	0.63957	0.774427	1.36654	1.43289	1.12894	1.52382	1.37562	1.59729	1.46387	1.58995	1.05847	1.4491	1.63963	overlap
Smim3	0.178355	0.184426	0.395252	0.185099	0.19024	0.181337	0.142818	0.165137	0.161289	0.137167	0.531463	0.456135	0.574282	0.439594	0.206431	0	0.126064	0.135828	0.155577	0.17312	0.226883	0.550793	0.265582	0.22276	0.191805	overlap
Sox4	0.79557	0.853686	0.624959	0.936709	0.644907	0.923773	0.692625	0.860189	0.9509	0.77496	0.555421	0.439072	0.705333	0.205499	0.877924	0	0.637302	0.643079	0.93006	0.803587	0.855445	0.697248	0.372994	0.905141	0.803444	overlap
Srsf5	2.00617	1.64968	1.88903	1.80425	1.75867	2.08225	1.65518	2.03977	1.78348	1.83552	2.32503	2.25449	2.14565	2.37531	2.11445	2.4988	1.60337	1.88449	1.78485	1.80504	2.03478	1.89697	1.9603	1.79086	1.78787	overlap
Stk17b	0.397205	0.286501	0.383312	0.214124	0.185609	0.509121	0.253431	0.290099	0.286801	0.232693	0.942813	0.778126	0.832266	0.729363	0.505785	0.953743	0.359262	0.279899	0.282146	0.204641	0.576418	0.354456	0.374591	0.287473	0.222937	overlap
Sult1a1	0.694342	0.256411	0.491989	0.509358	0.844925	0.550053	0.219813	0.365541	0.437311	0.624743	0.82187	1.0817	0.633445	0.924952	0.450247	0.953743	0.203059	0.426505	0.356628	0.475109	0.739067	0	0.747853	0.643775	0.862621	overlap
Tmed5	0.861433	0.54722	0.915137	0.834926	0.64206	0.764228	0.65011	0.7488	0.70813	0.528092	1.09022	1.02254	1.04062	1.00857	0.758704	0	0.67062	0.527859	0.681896	0.526293	0.903593	0.752259	1.12541	0.724249	0.592389	overlap
Tsc22d1	1.69141	1.08929	1.64242	1.30349	1.24278	1.57094	1.01334	1.57764	1.2053	1.16012	2.52402	2.30326	2.12296	2.26379	1.60242	0.953743	1.07006	1.35924	1.25436	1.12247	1.62311	0.898713	1.36263	1.29113	1.229	overlap
Tsc22d3	0.819141	0.625368	0.839198	0.675463	0.815818	1.34408	0.86159	1.21903	1.06887	1.24771	2.7974	2.64167	2.32528	2.72208	1.26204	0	0.773101	1.1373	1.05018	1.24614	1.43882	1.09756	0.598167	1.26479	1.29809	overlap
Ucp2	0.698059	0.943813	0.707642	0.768071	0.636117	0.768347	1.13078	0.735896	0.872118	0.691422	1.18325	1.36872	1.30157	1.11297	0.773484	1.43289	0.991839	0.653932	0.860967	0.744544	0.746123	0	0.695571	0.802405	0.705081	overlap
mt-Nd1	2.61973	2.77951	2.57243	2.68793	2.61377	2.64274	2.75251	2.64583	2.7043	2.56574	2.90288	2.99741	3.05505	3.03593	2.58455	2.622	2.844	2.49907	2.65871	2.54143	2.75691	2.33509	2.713	2.81934	2.72224	overlap
mt-Nd3	1.6387	1.49294	1.55795	1.68992	1.57875	1.81774	1.67324	1.83434	1.83396	1.67755	2.1545	2.23267	2.22829	2.33831	1.53918	1.75548	1.49671	1.39433	1.57505	1.42356	2.19108	1.88251	2.07224	2.26177	2.1377	overlap

## Sheet: dmPGE2_1.2
	GCSF_Activated	GCSF_Cell-cycle	GCSF_Interferon	GCSF_Metabolism	GCSF_Quiescent	ct_Activated	ct_Cell-cycle	ct_Interferon	ct_Metabolism	ct_Quiescent	dmPGE2_Activated	dmPGE2_Acute-Activation	dmPGE2_Metabolism	dmPGE2_Quiescent	indo_Activated	indo_Acute-Activation	indo_Cell-cycle	indo_Interferon	indo_Metabolism	indo_Quiescent	pIC_Activated	pIC_Cell-cycle	pIC_Interferon	pIC_Metabolism	pIC_Quiescent	specific
1110008F13Rik	0.957417	1.1716	1.10791	1.10688	0.876992	0.87329	1.22331	0.930097	1.00992	0.799107	0.824272	0.751612	0.928113	0.798117	0.889407	1.43289	1.14923	1.04418	1.03156	0.760274	0.845069	0.90258	0.746076	0.922662	0.730956	HSC_only
2010107E04Rik	0.83453	1.12361	0.680327	0.915227	0.778741	0.82035	1.17484	0.802938	0.962737	0.795334	0.888898	1.06201	1.17528	1.26373	0.728269	0	1.029	0.697763	0.880517	0.712863	1.07406	1.85612	0.926285	1.15372	0.974234	HSC_only
5033406O09Rik	0.282953	0.306059	0.15346	0.243907	0.322348	0.348692	0.390747	0.351292	0.403226	0.408033	0.286251	0.231796	0.319988	0.131246	0.391697	0	0.335157	0.245235	0.423521	0.437396	0.433549	0.342792	0.137781	0.470507	0.426532	HSC_only
9530068E07Rik	0.313392	0.552014	0.336351	0.340194	0.340467	0.308296	0.379123	0.344895	0.353665	0.320457	0.535795	0.472836	0.545222	0.422469	0.314705	0	0.360015	0.465036	0.358296	0.32647	0.351915	0.208001	0.421709	0.333691	0.346463	HSC_only
AC160336.1	0.327158	0.470362	0.46705	0.367735	0.340762	0.368301	0.422623	0.473089	0.350754	0.400351	0.707614	0.654628	0.568359	0.399569	0.312874	0	0.386266	0.24159	0.316455	0.345389	0.441477	0.810381	0.595936	0.617767	0.480491	HSC_only
Abracl	0.71981	1.11639	0.680748	0.927539	0.707707	0.737756	1.25848	0.641126	0.922508	0.721743	0.74764	0.672329	0.888125	0.506157	0.751913	0	1.2904	0.853863	0.94596	0.694434	0.767563	1.25174	0.737486	0.836809	0.690295	HSC_only
Acer2	0.0409461	0.0114123	0.0407954	0.0344382	0.0362669	0.0438422	0.0415342	0	0.0424707	0.0481112	0.222421	0.288747	0.140991	0.200384	0.0434108	0	0.0177847	0	0.0372608	0.0425587	0.036378	0	0.0658693	0.0529017	0.0430781	HSC_only
Adh5	0.692708	0.811743	0.579766	0.789501	0.611783	0.653755	0.877032	0.69503	0.793473	0.614763	0.501021	0.572441	0.765931	0.520969	0.642902	0	0.862544	0.699813	0.818631	0.619531	0.467537	0.208001	0.531072	0.712287	0.622379	HSC_only
Afap1l1	0.481983	0.35084	0.21639	0.457058	0.514497	0.458623	0.388363	0.375448	0.415337	0.442577	0.6665	0.621383	0.573549	0.548891	0.445835	0	0.362028	0.449848	0.388895	0.456207	0.526055	0.550793	0.247845	0.542515	0.530596	HSC_only
Ago3	0.13709	0.220031	0.172211	0.15517	0.121193	0.1369	0.134086	0.0704319	0.121042	0.111711	0.440389	0.302335	0.334267	0.276542	0.128625	0	0.0990249	0.0897085	0.116671	0.124975	0.109976	0	0.158722	0.207474	0.156366	HSC_only
Ak2	0.668239	1.18899	0.577307	0.910964	0.56861	0.594057	1.09871	0.689142	0.810836	0.530114	0.5394	0.599862	0.827056	0.326231	0.634652	1.75548	1.10651	0.544254	0.844134	0.547738	0.608902	1.67069	0.576214	0.763231	0.454627	HSC_only
Anp32b	1.80085	2.49869	1.60203	2.14262	1.67088	1.53524	2.44419	1.58435	1.9536	1.47832	1.45235	1.67513	1.88285	1.4329	1.55418	1.99899	2.38633	1.50533	1.95213	1.50291	1.48712	1.94427	1.34483	1.76918	1.41337	HSC_only
Ap2s1	0.664743	1.03962	0.455335	0.741559	0.653066	0.594448	0.954909	0.554989	0.691526	0.605479	0.483319	0.506431	0.657029	0.69381	0.594297	0.953743	0.895291	0.590036	0.707534	0.589593	0.663171	0.559788	0.480134	0.586621	0.505174	HSC_only
Apex1	0.627831	0.737646	0.589069	0.865822	0.505527	0.407828	0.590818	0.357421	0.675691	0.367371	0.274566	0.403807	0.639808	0.23823	0.403856	0	0.47011	0.293654	0.674761	0.347039	0.3188	0.467589	0.404494	0.508194	0.326462	HSC_only
Apoe	1.80543	1.84366	2.01533	1.74786	1.86955	1.97542	1.79715	1.72788	1.87022	2.05675	1.82577	1.95019	1.55934	1.55502	1.93232	3.07917	1.68905	1.96393	1.84508	1.96774	1.58742	1.95708	1.59904	1.69289	1.73998	HSC_only
Arf3	0.395502	0.359726	0.657593	0.375228	0.344634	0.277823	0.254045	0.348695	0.306533	0.299311	0.308244	0.435166	0.495283	0.142809	0.290262	0	0.242748	0.285238	0.327216	0.291619	0.286866	0	0.325999	0.34829	0.34571	HSC_only
Arid2	0.236608	0.300027	0.233738	0.237844	0.22565	0.256389	0.349094	0.243959	0.241358	0.217705	0.522422	0.315181	0.278644	0.473071	0.234953	0	0.225101	0.2996	0.232834	0.224224	0.41249	0.354456	0.361729	0.33538	0.283084	HSC_only
Arid4a	0.458155	0.506403	0.243084	0.324963	0.381312	0.455108	0.456203	0.462674	0.38527	0.450214	0.744231	0.41409	0.501899	0.486997	0.49341	0	0.413573	0.59574	0.397424	0.471062	0.65997	1.00666	0.514602	0.483706	0.593143	HSC_only
Arl4a	0.404533	0.369187	0.442609	0.367648	0.310658	0.371998	0.368995	0.57842	0.321553	0.33843	0.584376	0.62689	0.424894	0.712942	0.43453	0	0.4568	0.315173	0.386304	0.361292	0.408948	0.544258	1.03312	0.437217	0.38182	HSC_only
Arpc4	0.522648	0.823686	0.600475	0.586891	0.49202	0.459541	0.626118	0.559723	0.581287	0.448237	0.676067	0.784843	0.867408	0.702396	0.535531	0	0.762011	0.422319	0.654489	0.507169	0.618204	0.467589	0.550352	0.682468	0.575356	HSC_only
Arpc5	0.87369	0.926916	1.07402	0.912154	0.941116	0.819793	0.875907	0.900126	0.850518	0.847291	1.05089	1.04343	0.945992	1.1305	0.90593	1.43289	0.875382	0.996892	0.884223	0.901418	0.756981	1.40005	0.947216	0.963411	0.925693	HSC_only
Asah1	0.311382	0.230725	0.441816	0.239272	0.297163	0.379151	0.337504	0.505704	0.328425	0.436687	0.64787	0.534145	0.428213	0.564931	0.406846	0	0.326689	0.37255	0.334374	0.432861	0.4675	0.208001	0.400248	0.35475	0.498515	HSC_only
Atp5g1	1.27075	1.35527	1.01212	1.57372	1.11453	1.01912	1.49133	1.00663	1.4285	0.984641	0.853823	1.10237	1.32112	0.763248	1.00555	1.99899	1.38448	0.975069	1.4057	0.935868	0.897892	1.24918	0.892063	1.20165	0.911054	HSC_only
Atp5h	1.4667	1.73704	1.30248	1.60627	1.48973	1.46543	1.75383	1.61777	1.66217	1.45051	1.31464	1.37218	1.53487	1.26782	1.44741	0.953743	1.79047	1.47847	1.61436	1.44506	1.26839	2.11694	1.23855	1.46245	1.39906	HSC_only
Atpif1	1.28518	1.73311	1.17221	1.41915	1.23036	1.40484	1.89698	1.24076	1.60941	1.38193	1.35063	1.25043	1.461	1.10293	1.31208	0.953743	1.82046	1.29046	1.5418	1.35332	1.33493	1.66386	1.17078	1.48578	1.33186	HSC_only
Brf1	0.130126	0.198562	0.204812	0.134899	0.121179	0.113975	0.105043	0.11571	0.11745	0.100654	0.204044	0.141918	0.195577	0.302343	0.122304	0	0.157833	0.17267	0.120733	0.109662	0.114275	0	0.106281	0.113073	0.154961	HSC_only
Btg3	0.0960966	0.0649299	0	0.0894117	0.081717	0.111823	0.0711512	0.100754	0.0903156	0.0827183	0.296244	0.297863	0.398097	0.405772	0.0916227	0	0.0684071	0.0886657	0.0873452	0.0771606	0.152742	0	0.148226	0.151558	0.135844	HSC_only
Bzw2	0.567349	0.704446	0.539575	0.798467	0.463308	0.428923	0.592905	0.418087	0.718931	0.369173	0.334074	0.432311	0.629626	0.272642	0.42703	0	0.531915	0.348614	0.708096	0.37551	0.390087	0.908949	0.422687	0.659971	0.320895	HSC_only
C1qbp	1.10784	1.22221	1.08211	1.44795	0.98813	0.883543	1.12147	0.868147	1.25025	0.785483	0.712307	0.978307	1.17348	0.602464	0.846776	1.43289	1.13629	0.795635	1.20325	0.796394	0.74084	0.637604	0.685784	1.08634	0.779203	HSC_only
Capza2	0.996099	1.18924	1.55533	1.04362	1.00093	0.918663	1.02475	1.29126	0.988737	0.899914	1.14898	1.10047	1.04867	1.12901	0.943746	1.43289	1.06169	1.30908	0.990236	0.934758	1.0522	1.24725	1.45346	1.04291	1.1154	HSC_only
Ccnd1	0.195947	0.184325	0.0797001	0.296114	0.210971	0.27556	0.241141	0.228812	0.411717	0.215781	0.205235	0.271414	0.313313	0.129857	0.23536	0	0.204708	0.263567	0.365453	0.199982	0.207825	0	0.129323	0.367501	0.239326	HSC_only
Cct3	1.21631	1.21785	1.15382	1.53181	1.07779	0.937559	1.19003	1.20978	1.28051	0.868557	0.831427	0.979095	1.24691	0.722866	0.936037	1.43289	1.30524	1.12717	1.29809	0.8683	0.743479	0.752259	1.20229	1.16999	0.804738	HSC_only
Cct5	1.41684	1.56011	1.34725	1.6181	1.28949	1.17404	1.44464	1.26512	1.36802	1.15164	0.984755	1.15208	1.21154	1.03242	1.25189	0	1.54621	1.12614	1.47785	1.21625	1.13749	0.637604	1.17258	1.33681	1.08805	HSC_only
Cct8	1.23522	1.3712	1.45145	1.47294	1.10036	0.989142	1.24682	1.15952	1.28941	0.943467	0.887578	1.07939	1.30068	0.769098	1.00593	0	1.27321	1.0591	1.31403	0.988994	0.906262	0.980396	1.04397	1.18871	0.913277	HSC_only
Ccz1	0.300404	0.349058	0.23031	0.291343	0.262838	0.279025	0.40041	0.237889	0.284121	0.26085	0.316852	0.312725	0.399298	0.635307	0.30284	0	0.367015	0.244578	0.273939	0.253053	0.27042	0.208001	0.325838	0.311902	0.264614	HSC_only
Cdca7	0.361327	0.565604	0.301276	0.639081	0.275772	0.246297	0.770142	0.368078	0.588713	0.219144	0.128774	0.178372	0.43108	0.0628067	0.234221	0	0.66658	0.221481	0.550421	0.223838	0.198402	0.697248	0.184919	0.473617	0.243084	HSC_only
Cdk11b	0.81806	0.44513	0.535967	0.574657	0.49053	0.973839	0.611579	0.559837	0.619304	0.52107	0.687667	0.475154	0.637912	0.681196	0.954619	0	0.632724	0.560313	0.638999	0.45641	0.839519	0.208001	0.455783	0.575718	0.491838	HSC_only
Cdk2ap2	0.478195	0.540452	0.646135	0.585341	0.529763	0.437569	0.604018	0.457384	0.495497	0.465466	0.374351	0.319729	0.285271	0.462619	0.502159	0.953743	0.653458	0.620364	0.532674	0.491544	0.350645	0.752259	0.39639	0.477557	0.36445	HSC_only
Cdk4	0.995584	1.34532	0.793921	1.26506	0.858186	0.891356	1.54177	0.886663	1.22109	0.847287	0.812472	0.827894	1.07438	0.705847	0.899575	1.43289	1.43046	0.85394	1.20136	0.843193	0.735209	1.49343	0.71457	1.08327	0.768271	HSC_only
Celf2	1.00995	0.818364	1.01573	0.889319	0.928839	1.11097	0.90742	1.01343	1.02831	1.01858	1.40325	1.28232	1.22361	1.15998	1.13662	0	0.933155	1.18728	1.03747	1.08633	1.25686	0.895465	1.24184	1.18102	1.1988	HSC_only
Cenpx	0.618746	1.15434	0.494516	0.771208	0.617483	0.632175	1.11734	0.572818	0.826404	0.613352	0.550213	0.574326	0.694407	0.444164	0.598178	1.43289	0.998141	0.679094	0.804961	0.620318	0.571263	0.637604	0.565992	0.665214	0.620439	HSC_only
Chd7	0.171681	0.100034	0.128933	0.151448	0.134837	0.122332	0.0598031	0.145209	0.104956	0.091676	0.406938	0.45984	0.324182	0.267393	0.128192	0	0.0571192	0.105737	0.108878	0.0844477	0.126359	0	0.439891	0.132298	0.135909	HSC_only
Chmp4b	0.717186	0.643735	0.991213	0.761229	0.645818	0.514144	0.53737	0.86647	0.526803	0.488469	0.791906	0.772236	0.775544	0.680018	0.52652	0	0.667089	0.702906	0.555841	0.516871	0.724045	0.697248	1.26437	0.758222	0.622631	HSC_only
Clec1a	0.237358	0.200678	0.255766	0.189397	0.302483	0.332804	0.240325	0.492092	0.276263	0.395498	0.583993	0.509811	0.350749	0.382759	0.34522	0	0.238052	0.389394	0.273754	0.397091	0.399763	0.208001	0.248266	0.389695	0.479377	HSC_only
Clint1	0.596903	0.714578	0.784824	0.653397	0.553276	0.47667	0.431186	0.456354	0.463866	0.438848	0.719958	0.598378	0.648435	0.566174	0.492194	0.953743	0.555135	0.358702	0.498154	0.424125	0.632996	0.697248	0.655347	0.602908	0.537978	HSC_only
Cltc	0.457594	0.474532	0.41412	0.447892	0.370105	0.369946	0.292071	0.339121	0.329981	0.285101	0.583518	0.61688	0.620035	0.342423	0.388582	0	0.337276	0.347768	0.34797	0.28332	0.495258	0.208001	0.40804	0.389344	0.359301	HSC_only
Cmas	0.661902	0.490082	0.517056	0.586855	0.69435	0.822684	0.681378	0.625264	0.692519	0.799393	1.04028	0.815708	0.812262	0.903133	0.833626	1.43289	0.595066	0.734348	0.758253	0.846682	0.894237	1.29987	0.643933	0.744811	0.882889	HSC_only
Coa3	0.590663	0.687467	0.771314	0.711442	0.541024	0.548896	0.727436	0.605339	0.628044	0.541102	0.447875	0.337429	0.395272	0.382817	0.525767	0	0.794118	0.413677	0.641229	0.549163	0.475841	0.687464	0.386114	0.560676	0.47783	HSC_only
Coro1a	1.26698	1.52813	0.940784	1.37582	1.22644	1.43717	1.66245	1.40904	1.59351	1.34483	1.27156	1.25357	1.50543	0.99107	1.41852	1.43289	1.51736	1.33203	1.56254	1.33914	1.28712	1.32918	1.1068	1.45293	1.14439	HSC_only
Cox7b	0.937446	1.20233	0.984213	1.13262	0.908809	0.79148	1.11808	0.936918	1.00531	0.796465	0.668399	0.786186	0.812795	0.51924	0.860927	0	1.12628	0.859378	1.06889	0.821019	0.769404	1.10405	0.885096	1.05266	0.801835	HSC_only
Cox7c	1.44394	1.55894	1.41216	1.53883	1.33628	1.37849	1.73407	1.45505	1.52944	1.36878	1.51872	1.57666	1.75222	1.30172	1.29448	1.43289	1.57633	1.30584	1.43736	1.28565	1.50417	2.00082	1.49616	1.63397	1.55911	HSC_only
Csnk2a1	0.323935	0.31112	0.251832	0.346232	0.312608	0.304156	0.319176	0.372095	0.332503	0.306423	0.526415	0.43835	0.498522	0.503607	0.315788	0	0.380172	0.333342	0.356274	0.339024	0.504333	0.208001	0.381437	0.477892	0.394229	HSC_only
Csrnp1	0.222099	0.152246	0.214814	0.110083	0.110346	0.309	0.189293	0.26537	0.177358	0.12287	0.433388	0.301064	0.241073	0.485555	0.360131	0	0.227632	0.279086	0.18485	0.127851	0.663239	0.544258	1.41795	0.308458	0.295887	HSC_only
Ctsl	0.617326	0.257083	0.344435	0.547902	0.612765	0.622401	0.24424	0.55583	0.508366	0.639383	0.734692	0.73096	0.617636	0.833381	0.645778	0	0.231797	0.768922	0.526659	0.646481	0.590145	0.342792	0.566112	0.550579	0.661574	HSC_only
Cuta	0.394204	0.65417	0.570926	0.538198	0.361925	0.450333	0.804041	0.42091	0.600445	0.414057	0.391254	0.394507	0.497232	0.326454	0.482688	0	0.801359	0.417862	0.610168	0.450068	0.482534	0.697248	0.353826	0.52594	0.390518	HSC_only
Dbi	0.853057	1.07887	0.665592	0.950787	0.787791	0.885106	1.14573	0.859178	1.05829	0.90273	0.803019	0.902748	0.963129	0.741485	0.870099	0.953743	1.10768	0.990951	1.00738	0.834807	0.826673	1.10405	0.788058	0.965268	0.812404	HSC_only
Dctpp1	0.50821	1.12342	0.389953	0.809795	0.413658	0.370253	1.11139	0.348122	0.766709	0.331988	0.23451	0.333223	0.533565	0.0783511	0.350335	0	1.07404	0.275628	0.707918	0.323397	0.263492	0.817272	0.247244	0.530812	0.276907	HSC_only
Ddost	0.730176	1.01941	0.569042	0.913686	0.723733	0.623227	1.00067	0.881038	0.80024	0.615819	0.513399	0.587946	0.673491	0.631002	0.668925	0.953743	0.932862	0.637922	0.837214	0.693439	0.602014	0.90258	0.57543	0.785074	0.649589	HSC_only
Ddx39b	0.930382	1.36204	1.04897	1.09496	0.878533	0.829971	1.40204	0.840244	1.00161	0.788829	0.783065	0.777755	1.01031	0.733001	0.871885	0	1.46271	1.05204	1.08689	0.875902	0.796194	1.04192	0.835395	0.956698	0.830286	HSC_only
Ddx3y	0.18542	0.097748	0.0873726	0.14153	0.147695	0.20009	0.152351	0.178585	0.147831	0.138652	0.55959	0.471905	0.539638	0.35549	0.317404	0	0.150201	0.213861	0.209863	0.181354	0.390409	0	0.229276	0.19347	0.198293	HSC_only
Ddx50	1.13429	0.700953	0.945651	1.00874	0.920889	1.07695	0.873726	0.829351	0.952445	0.858181	1.1977	1.1728	1.05258	1.17309	1.11448	1.43289	0.862063	0.819686	0.964093	0.871891	1.02396	0.559788	0.621323	0.864163	0.867286	HSC_only
Ddx6	0.674151	0.751213	0.687838	0.648093	0.665549	0.542079	0.603827	0.500964	0.558097	0.496825	0.815588	0.786272	0.742229	0.984788	0.535935	0	0.675272	0.629311	0.554399	0.565967	0.754541	1.15505	0.617164	0.645791	0.65546	HSC_only
Dgat1	0.0747329	0.103184	0	0.0592732	0.056012	0.0571345	0.0493771	0.0850816	0.0507377	0.062048	0.157743	0.293444	0.236361	0.226524	0.0813884	0	0.0568532	0.0911648	0.0616162	0.0569715	0.0673322	0	0.0481332	0.0493427	0.0468874	HSC_only
Dkc1	0.696167	0.789262	0.902496	1.00025	0.576483	0.503047	0.87679	0.539336	0.800268	0.431242	0.420869	0.487509	0.707507	0.165151	0.477685	1.43289	0.674652	0.376405	0.760028	0.441383	0.452467	0.90258	0.432503	0.756985	0.438219	HSC_only
Dld	0.345691	0.433873	0.271066	0.40386	0.324234	0.308514	0.424794	0.39873	0.327064	0.272965	0.603815	0.422476	0.443591	0.25583	0.316732	0	0.452846	0.261291	0.352492	0.272925	0.272726	0.550793	0.341287	0.339379	0.403122	HSC_only
Dnajb1	0.613015	0.599179	0.490815	0.442436	0.354493	0.794066	0.623571	0.580723	0.51876	0.406382	0.544999	0.463238	0.455209	0.314144	0.851414	1.43289	0.546319	0.359499	0.540077	0.369648	0.656163	0.697248	0.580011	0.533292	0.393675	HSC_only
Dnajc9	0.287698	1.05068	0.232711	0.413256	0.308848	0.290599	1.10138	0.378729	0.465651	0.312984	0.307518	0.310908	0.379586	0.371281	0.313858	0.953743	1.23982	0.294509	0.422617	0.305472	0.338696	0.559788	0.232211	0.401353	0.331249	HSC_only
Dnmt1	0.212436	0.969415	0.297799	0.378187	0.20278	0.267233	1.00465	0.292374	0.456474	0.213533	0.319609	0.219459	0.388724	0.253279	0.237547	0	1.11066	0.224599	0.401019	0.218802	0.351476	0.637604	0.215637	0.349137	0.25871	HSC_only
Dok1	0.260137	0.245043	0.315038	0.269808	0.294198	0.261257	0.304416	0.223327	0.259698	0.311333	0.386643	0.530563	0.411887	0.595482	0.25568	0	0.223324	0.303731	0.273639	0.338436	0.375373	0.342792	0.271924	0.320272	0.281411	HSC_only
Dtymk	0.420608	1.07445	0.45395	0.617115	0.381144	0.388854	1.23029	0.481662	0.669422	0.332929	0.536601	0.46993	0.623463	0.502779	0.404818	1.43289	1.12019	0.412262	0.644906	0.368629	0.434374	0.697248	0.374778	0.565285	0.362396	HSC_only
Dut	0.413746	1.54755	0.314594	0.631512	0.37281	0.455548	1.63793	0.294696	0.828837	0.437054	0.330664	0.381289	0.611766	0.447865	0.443237	0.953743	1.62853	0.342332	0.753788	0.412097	0.362511	0.949168	0.337055	0.61464	0.438999	HSC_only
Dynlt3	0.407118	0.515253	0.389514	0.420449	0.426124	0.473724	0.47868	0.401322	0.455378	0.456747	0.708111	0.659915	0.655171	0.819637	0.489485	0	0.406406	0.422089	0.477122	0.489813	0.518638	0.342792	0.438952	0.48511	0.527405	HSC_only
Ebna1bp2	0.586347	0.775092	0.703818	0.818523	0.515582	0.478209	0.633258	0.478617	0.697917	0.469064	0.397792	0.428155	0.635779	0.27837	0.476044	0	0.643662	0.361295	0.684199	0.459014	0.463791	0.467589	0.520353	0.603312	0.494792	HSC_only
Edf1	0.976562	1.15892	1.05204	1.07945	0.983778	0.851524	1.11193	0.942337	0.991187	0.876466	0.715553	0.838906	0.919431	0.932547	0.853665	0	1.12801	0.98785	1.01469	0.899693	0.703926	0.467589	0.745593	0.912656	0.78797	HSC_only
Eef1b2	2.95741	3.01667	2.90514	3.01781	2.97772	3.04016	3.14899	2.97535	3.10837	3.0656	2.82092	2.93331	2.90149	2.91719	3.02352	3.27814	3.11249	3.00137	3.11034	3.0469	2.83488	3.19564	2.82839	2.90862	2.89839	HSC_only
Eef1g	1.90081	2.14386	1.92806	2.12701	1.89652	1.92384	2.174	1.95618	2.17848	1.98221	1.71519	1.82742	1.9315	1.51366	1.90334	2.19467	2.10325	1.8264	2.14961	1.94594	1.77421	2.34868	1.71252	1.99403	1.81609	HSC_only
Eef2	2.82172	2.54761	2.68331	2.69537	2.83982	2.83119	2.58002	2.67629	2.76476	2.85196	2.98247	3.0522	2.89847	2.98056	2.834	2.83051	2.54033	2.79718	2.79956	2.87451	2.86194	2.78618	2.74393	2.88211	2.93727	HSC_only
Egfl7	0.645491	0.82576	0.578453	0.63394	0.665004	0.599201	0.779981	0.478385	0.703109	0.67347	0.853709	1.10171	0.7899	1.23919	0.675666	1.43289	0.9255	0.725077	0.709072	0.680773	0.603668	0.559788	0.399547	0.63284	0.660034	HSC_only
Egln3	0.0629526	0.034908	0	0.0545532	0.0466956	0.0763277	0.089942	0	0.0578574	0.0493317	0.368837	0.284756	0.305726	0.157483	0.0835436	0	0.0997151	0.0230902	0.0653826	0.0520968	0.0972005	0.342792	0.0232041	0.0726873	0.0582107	HSC_only
Egr1	1.46643	0.595761	1.16249	0.849967	0.982451	1.73551	0.900326	1.43111	1.1445	1.26907	1.79728	1.02715	1.19507	1.18253	1.69396	0.953743	1.13915	1.14679	1.04444	1.11392	1.87585	0.208001	1.23514	1.44652	1.51319	HSC_only
Eif3i	1.31618	1.36733	1.27609	1.45137	1.22333	1.27168	1.47311	1.15403	1.40245	1.22474	1.09674	1.2749	1.31771	1.32469	1.26836	2.19467	1.42783	1.32894	1.43913	1.24549	1.08117	1.78505	1.10341	1.295	1.16419	HSC_only
Eif3j1	0.39077	0.585933	0.234107	0.505189	0.327755	0.295071	0.373871	0.419295	0.368862	0.235165	0.353631	0.341032	0.587373	0.295343	0.232939	0.953743	0.378869	0.286638	0.28515	0.191782	0.471945	1.10405	0.446173	0.516803	0.362156	HSC_only
Eif5	1.19424	1.16936	1.10864	1.18328	1.0946	1.12661	1.10732	1.10244	1.09788	1.02254	0.856842	1.03583	0.976385	1.00518	1.13507	1.43289	1.18267	1.0271	1.12188	1.02852	1.0375	0.810381	0.960954	1.11663	1.03587	HSC_only
Elavl1	0.690945	0.905927	0.772437	0.77866	0.584906	0.503434	0.863814	0.551954	0.623912	0.496799	0.68516	0.576876	0.687235	0.693217	0.561643	1.99899	0.834964	0.56833	0.631157	0.492442	0.57894	0.550793	0.598575	0.607257	0.51879	HSC_only
Elf1	1.06318	0.881576	1.00013	0.80177	0.761922	1.1253	0.948747	1.06728	0.93174	0.855438	1.26489	1.07153	1.10425	1.18198	1.22758	1.75548	1.02143	1.06314	0.986802	0.890516	1.41311	1.32091	1.1746	1.08009	1.01667	HSC_only
Ell2	0.0890455	0.045624	0.137454	0.0599946	0.0937488	0.0912834	0.0802669	0.177563	0.0715626	0.083113	0.219358	0.227332	0.290063	0.349871	0.103894	0	0.0729587	0.119121	0.0757941	0.085198	0.190653	0	0.173613	0.0915803	0.118749	HSC_only
Elmsan1	0.131588	0.120396	0.157282	0.0873135	0.0943318	0.104418	0.103869	0.173535	0.104154	0.106097	0.380084	0.40876	0.295565	0.145176	0.106888	0	0.128626	0.150297	0.10375	0.10301	0.14039	0.342792	0.0826147	0.105758	0.180713	HSC_only
Emp3	1.26024	1.59383	0.934539	1.32297	1.28001	1.36358	1.6384	1.24127	1.45704	1.40861	1.21477	1.12883	1.16697	1.37078	1.35996	0.953743	1.52479	1.11634	1.44815	1.38034	1.17513	1.89829	0.897573	1.40533	1.21805	HSC_only
Ensa	0.410398	0.570121	0.344436	0.403805	0.434216	0.433508	0.563423	0.41458	0.450334	0.431859	0.55042	0.588097	0.689254	0.660041	0.469649	0.953743	0.547765	0.562475	0.462797	0.473145	0.469839	0.208001	0.430954	0.515414	0.531399	HSC_only
Esam	0.442726	0.424543	0.332602	0.421104	0.438376	0.515907	0.548014	0.338638	0.504823	0.552068	0.483699	0.324654	0.412313	0.387845	0.553463	1.75548	0.393021	0.375878	0.516427	0.546417	0.425324	1.15505	0.267436	0.519503	0.483894	HSC_only
Esyt1	0.243184	0.384515	0.0345868	0.287759	0.193796	0.184521	0.306717	0.146215	0.237012	0.15001	0.241021	0.24404	0.230849	0.334698	0.193117	0	0.356008	0.132887	0.216687	0.163022	0.276837	0	0.338562	0.217599	0.247	HSC_only
Exosc5	0.55217	0.745054	0.403907	0.705887	0.493938	0.452698	0.732697	0.286255	0.694493	0.429195	0.347861	0.3251	0.579874	0.244915	0.469262	0	0.653689	0.459149	0.728908	0.445195	0.364774	0.559788	0.349168	0.577171	0.408476	HSC_only
Faap20	0.350501	0.36166	0.51398	0.31885	0.350064	0.415781	0.390412	0.478471	0.410168	0.418464	0.246106	0.28883	0.313867	0.263887	0.420975	0	0.47668	0.349708	0.420399	0.426624	0.484413	0	0.289739	0.360109	0.453878	HSC_only
Fam117b	0.149488	0.0499355	0.039818	0.146581	0.14611	0.152667	0.100205	0.117135	0.141477	0.161681	0.309252	0.327709	0.333116	0.427615	0.179737	0	0.135796	0.159315	0.163421	0.170312	0.213801	0.208001	0.123878	0.159935	0.189909	HSC_only
Fbl	1.06085	1.17416	1.03095	1.3555	0.949619	0.903787	1.23709	0.920015	1.22058	0.795896	0.783045	0.89916	1.22927	0.635713	0.897666	1.43289	1.19061	0.828315	1.23377	0.807029	0.892233	0.865208	0.796685	1.16741	0.720372	HSC_only
Fkbp1a	1.12328	1.07059	0.771052	1.18021	1.10366	0.9733	1.01492	0.72192	1.08274	0.926812	1.17157	1.45041	1.23764	1.26229	0.976911	0.953743	0.988055	1.00486	1.08437	0.944297	0.960113	1.24918	0.818056	1.02726	0.980844	HSC_only
Fkbp3	0.920232	1.20876	0.894675	1.07286	0.917131	1.00387	1.25558	1.10581	1.16872	0.991919	0.946636	0.940768	1.16736	0.573853	0.963199	0.953743	1.21126	0.906934	1.12571	0.932301	1.0648	0.704924	0.894458	1.11788	0.902819	HSC_only
Fkbp4	0.866133	1.02014	0.714428	1.06438	0.73614	0.777804	1.13177	0.691757	1.03517	0.737233	0.665756	0.75798	1.14235	0.679837	0.763955	1.75548	1.12092	0.73454	1.05482	0.75065	0.5257	0.354456	0.564151	0.924234	0.713695	HSC_only
Foxo3	0.200691	0.211238	0.357232	0.190704	0.207305	0.257239	0.188579	0.211102	0.218562	0.25448	0.558019	0.394257	0.27472	0.662364	0.276921	0	0.195836	0.122422	0.235583	0.22778	0.251296	0	0.137293	0.266983	0.285989	HSC_only
Ftl1	3.19751	2.84703	3.07287	3.09098	3.19207	3.18895	2.72999	3.1571	3.0816	3.16096	2.98508	3.10576	2.98561	3.08635	3.23376	3.54106	2.77282	3.18242	3.1337	3.21678	2.9174	2.41514	2.69949	2.9375	2.9861	HSC_only
Gar1	0.724154	0.837527	0.816582	0.90859	0.590842	0.51594	0.739742	0.468471	0.768062	0.464899	0.395984	0.500601	0.665456	0.276953	0.511325	1.43289	0.85027	0.446328	0.749361	0.440499	0.465186	0.354456	0.417857	0.719621	0.392497	HSC_only
Glrx3	0.852768	1.05594	0.972919	1.06542	0.75065	0.748123	0.904415	0.635726	0.937013	0.700377	0.627494	0.660297	0.835317	0.662826	0.737037	0	0.934162	0.696354	0.932212	0.703747	0.734071	0.354456	0.688829	0.846287	0.705931	HSC_only
Gm11808	0.420829	0.382683	0.596773	0.429096	0.417736	0.457194	0.474185	0.413039	0.453106	0.453059	0.817879	0.805618	0.839005	0.575985	0.428851	0	0.580169	0.443047	0.452842	0.441972	0.667775	0.980396	0.688688	0.766703	0.793176	HSC_only
Gm2000	0.408266	0.549976	0.440511	0.462572	0.421773	0.430041	0.422562	0.456448	0.499847	0.446375	0.588583	0.69944	0.702237	0.69704	0.361545	0	0.41171	0.280573	0.409161	0.385219	0.757078	1.18186	0.623732	0.676964	0.642468	HSC_only
Gm20186	0.0608972	0.0110727	0.132704	0.0462319	0.054347	0.0705999	0.0516014	0.032713	0.0457046	0.0490462	0.442196	0.283534	0.360012	0.131881	0.0659059	0	0.0267442	0.0142428	0.0497227	0.0503032	0.239496	0	1.29448	0.218999	0.087895	HSC_only
Gmfg	0.792796	0.863161	0.691073	0.817324	0.711289	0.854982	0.957209	0.68715	0.826849	0.693563	0.70034	0.60282	0.75539	0.531644	0.826748	0	0.669793	0.457303	0.860239	0.699206	0.773215	1.24918	0.64391	0.763258	0.741488	HSC_only
Gnai3	0.518094	0.477558	0.701821	0.501022	0.5214	0.456785	0.569557	0.630385	0.447686	0.45181	0.775159	0.761326	0.643027	0.586924	0.47466	0	0.400296	0.493392	0.459876	0.445377	0.465143	1.04192	0.621581	0.535873	0.564021	HSC_only
Gnb1	0.67906	0.730071	0.607959	0.737877	0.634919	0.614081	0.917944	0.570998	0.654538	0.565472	0.801814	0.901619	0.866703	0.717529	0.625119	0.953743	0.846197	0.613665	0.6606	0.605852	0.723974	1.04772	0.705695	0.75974	0.744304	HSC_only
Gng11	0.918649	0.929152	0.880077	0.87625	1.06115	1.08533	0.972325	0.930651	1.03013	1.20162	0.889016	0.910459	0.826257	0.863343	1.1223	0	1.02767	1.20906	1.06196	1.20167	1.15604	0.90258	0.757196	0.991023	1.16092	HSC_only
Gpbp1	0.586899	0.59898	0.609089	0.526039	0.527171	0.500967	0.521341	0.672442	0.46475	0.469354	0.547531	0.599602	0.714286	0.680942	0.516149	0.953743	0.532089	0.541781	0.513616	0.497555	0.592649	0.697248	0.737282	0.551518	0.601988	HSC_only
Gsto1	0.450053	0.387952	0.515917	0.581353	0.368461	0.434065	0.388539	0.318349	0.573773	0.372444	0.308686	0.366861	0.49019	0.375226	0.430738	0	0.332033	0.376918	0.594048	0.385835	0.405866	0.354456	0.400046	0.526048	0.371994	HSC_only
Gtf3a	0.40461	0.732484	0.375483	0.55541	0.415165	0.429973	0.874188	0.430002	0.633283	0.418728	0.354431	0.28638	0.479539	0.191273	0.417665	0	0.709788	0.485759	0.608729	0.413915	0.430391	0.208001	0.308625	0.491314	0.311359	HSC_only
Gtpbp4	0.71359	0.946555	0.708368	0.899732	0.612369	0.549344	0.600525	0.587442	0.682948	0.436832	0.581409	0.769466	0.914376	0.636472	0.558856	0.953743	0.633581	0.519093	0.643807	0.440386	0.611614	0	0.69991	0.715091	0.51924	HSC_only
H1f0	0.4876	0.883299	0.391855	0.435989	0.467349	0.639688	0.911902	0.549813	0.512843	0.57442	0.818968	0.86569	0.790787	0.913132	0.669115	1.75548	0.948377	0.422334	0.550452	0.57797	0.770454	0.687464	0.365788	0.509245	0.623425	HSC_only
Hacd4	0.835033	0.768785	0.694247	0.719575	0.946292	0.880181	0.735528	0.842712	0.783145	0.985913	0.726807	0.787868	0.678759	0.913021	0.871694	1.43289	0.685794	1.01268	0.764357	1.00944	1.03411	1.04192	0.721178	0.918606	0.99112	HSC_only
Hes1	0.792297	0.404446	0.463718	0.328981	0.1858	1.28048	0.6225	0.670506	0.564731	0.273884	0.515364	0.334575	0.434287	0.586063	1.49546	0	0.573621	0.617222	0.661764	0.266043	0.984135	0.637604	0.516416	0.41483	0.311957	HSC_only
Hint1	1.54223	2.1771	1.27262	1.7177	1.50569	1.45063	2.13325	1.48699	1.72817	1.44534	1.38192	1.50826	1.6313	1.54956	1.44877	1.43289	2.04317	1.43627	1.68487	1.4778	1.34474	1.55267	1.26805	1.51215	1.39165	HSC_only
Hirip3	0.198485	0.846326	0.22148	0.294525	0.174309	0.158364	0.845933	0.199139	0.299812	0.156241	0.183842	0.114651	0.141399	0.080746	0.149491	0	0.805884	0.193561	0.279326	0.167204	0.111517	0.354456	0.0993568	0.245285	0.138769	HSC_only
Hist1h2bc	0.391492	0.330041	0.30074	0.135781	0.209024	0.455024	0.324596	0.380117	0.157706	0.323817	0.186436	0.288052	0.151289	0.183621	0.385623	0.953743	0.486164	0.222974	0.160485	0.319612	0.51722	0.687464	0.171063	0.168021	0.344724	HSC_only
Hivep3	0.214712	0.11779	0	0.173245	0.200387	0.188247	0.0849244	0.223544	0.186804	0.2127	0.382786	0.452609	0.317153	0.327816	0.214708	0	0.0951379	0.287212	0.155997	0.201296	0.222556	0	0.166264	0.218563	0.254763	HSC_only
Hmgb1	1.84894	2.82203	1.65224	1.90057	1.85191	1.88116	2.70229	1.79049	1.97436	1.86199	2.12016	2.18804	2.13159	2.04908	1.91193	1.43289	2.73948	1.82567	1.99678	1.89103	2.16285	2.65489	1.79927	2.16506	2.10286	HSC_only
Hnrnpf	1.91178	2.12318	1.87269	2.12126	1.77137	1.62221	2.12581	1.73441	1.91978	1.53255	1.73531	1.90017	2.19461	1.69898	1.66521	2.35825	2.23062	1.52806	1.91886	1.56477	1.62186	2.05547	1.56482	1.80275	1.54523	HSC_only
Hnrnph2	0.558908	0.567003	0.624765	0.558874	0.49031	0.443194	0.526928	0.393768	0.432351	0.40303	0.538094	0.63826	0.713809	0.701166	0.454925	0	0.461475	0.521253	0.431278	0.401771	0.540977	0.687464	0.71001	0.486086	0.523209	HSC_only
Hnrnpk	1.80813	2.06634	1.68777	1.92915	1.70358	1.70289	1.97045	1.59341	1.84042	1.60646	1.81272	1.86124	2.08472	1.66137	1.72052	1.75548	1.98682	1.65155	1.84531	1.65178	1.85371	2.33171	1.62799	1.85308	1.67752	HSC_only
Hscb	0.40788	0.519324	0.562475	0.318685	0.434937	0.584673	0.542967	0.468565	0.484636	0.542018	0.445658	0.406495	0.434542	0.310895	0.559036	0	0.589587	0.442098	0.513795	0.547707	0.593748	0.898713	0.404371	0.520467	0.546408	HSC_only
Hsd17b10	1.02868	0.914948	0.814429	1.11598	0.946774	0.966303	0.947506	0.894588	1.12026	0.983046	0.621708	0.771387	0.795389	0.486665	1.04356	1.75548	0.972665	0.914581	1.18878	1.04961	0.884875	0.208001	0.848793	1.0325	0.947091	HSC_only
Hsp90aa1	2.13753	2.55972	2.27851	2.42924	1.89998	1.86798	2.53734	2.03736	2.19448	1.66353	1.73635	1.76799	2.08766	1.6848	1.91676	2.4988	2.62845	1.7979	2.23378	1.72761	1.76729	2.16683	1.81339	1.96126	1.54515	HSC_only
Hsp90ab1	3.20967	3.25102	3.17863	3.35756	3.11432	3.14798	3.36068	3.19529	3.3434	3.08019	2.99097	3.15926	3.26818	3.10193	3.16919	2.83051	3.43542	3.14743	3.35746	3.08986	3.01176	3.14941	2.94156	3.23705	2.98438	HSC_only
Hspd1	1.15248	1.41129	1.05908	1.56425	1.05703	0.947712	1.37291	1.05846	1.34138	0.856258	0.822731	0.998566	1.42519	0.544781	0.906709	0	1.35671	0.963249	1.31214	0.832824	0.828026	1.10405	0.888758	1.21197	0.889172	HSC_only
Hspe1	1.32614	1.47471	1.40874	1.67341	1.22673	1.22266	1.59065	1.22409	1.56033	1.16288	1.1118	1.17016	1.5096	0.974962	1.17381	1.75548	1.51251	1.12928	1.51684	1.12816	1.15348	0.637604	1.12066	1.39577	1.0578	HSC_only
Id1	0.33788	0.319028	0.196456	0.155379	0.0539698	0.447917	0.470615	0.276617	0.238623	0.0754648	0.178343	0.109551	0.156973	0.199646	0.555113	0.953743	0.536937	0.211934	0.253307	0.0724442	0.424143	0.544258	0.167225	0.158051	0.0545888	HSC_only
Idh2	0.518563	0.675056	0.573602	0.670815	0.488071	0.604068	0.950426	0.471992	0.782423	0.574304	0.539471	0.488643	0.781278	0.692691	0.624344	0.953743	0.95891	0.683882	0.810571	0.575415	0.537431	0.90258	0.539215	0.622428	0.536526	HSC_only
Igf1r	0.534793	0.581188	0.441319	0.467385	0.586728	0.63634	0.440402	0.459472	0.523952	0.600257	0.859926	0.808168	0.664557	0.802912	0.580054	0.953743	0.598559	0.489251	0.500246	0.568588	0.767646	0.342792	0.71554	0.707608	0.753726	HSC_only
Igfbp4	0.376824	0.478395	0.386897	0.530435	0.403469	0.505062	0.53346	0.365337	0.64607	0.466672	0.427857	0.444435	0.535419	0.42197	0.452655	1.43289	0.533921	0.336952	0.605391	0.435461	0.50566	0	0.354088	0.534146	0.473716	HSC_only
Imp3	1.00377	0.873437	0.948699	1.05935	0.982242	0.936535	0.928774	0.800195	0.996715	0.998425	0.773904	0.838122	0.865921	0.78952	0.917685	0.953743	0.917357	0.743118	0.966379	0.928582	0.845304	0.810381	0.526098	0.869513	0.893645	HSC_only
Impdh2	1.23019	1.63377	1.05897	1.40478	1.16233	1.17221	1.73948	1.1499	1.42367	1.1621	1.10503	1.17282	1.30215	1.05657	1.136	1.43289	1.66001	1.16655	1.38538	1.15208	1.15484	1.78505	1.17597	1.38906	1.03752	HSC_only
Ipo11	0.424291	0.514431	0.558881	0.433627	0.454052	0.572684	0.490633	0.4546	0.553129	0.526059	0.416073	0.451609	0.489075	0.122313	0.616977	0.953743	0.333259	0.307253	0.581683	0.565169	0.560845	0.342792	0.358421	0.546613	0.548074	HSC_only
Irf2bp2	0.375592	0.409142	0.378064	0.381364	0.333764	0.404484	0.265643	0.473187	0.39944	0.34947	0.804142	0.632758	0.775953	0.517595	0.423148	0.953743	0.32493	0.286193	0.414099	0.381303	0.524517	0.354456	0.73964	0.439866	0.334629	HSC_only
Isca1	0.686335	0.407978	0.304425	0.36032	0.270893	0.775931	0.444807	0.478753	0.435644	0.307512	0.538584	0.501307	0.573246	0.442831	0.783699	0.953743	0.421845	0.30772	0.438569	0.243454	0.596931	0.208001	0.348684	0.327115	0.294865	HSC_only
Itsn1	0.450505	0.266983	0.348937	0.310777	0.458849	0.532307	0.36786	0.346417	0.392407	0.526441	0.776453	0.54267	0.525478	0.327175	0.543707	0	0.300525	0.412972	0.38048	0.535771	0.638864	0.342792	0.424967	0.486151	0.659198	HSC_only
Khdrbs1	0.727832	1.12326	0.699451	0.814553	0.661325	0.607977	0.89904	0.73319	0.723495	0.532159	0.77188	0.761064	0.824631	0.997541	0.63165	0.953743	0.818076	0.771938	0.711228	0.554726	0.789342	0	0.744291	0.745112	0.635831	HSC_only
Khk	0.430203	0.462358	0.622797	0.491495	0.466621	0.507599	0.579441	0.431116	0.555465	0.524739	0.432599	0.516384	0.387387	0.499532	0.528973	1.75548	0.487312	0.534976	0.591305	0.515501	0.513475	0.208001	0.468673	0.570062	0.424779	HSC_only
Kif5b	0.633897	0.829799	0.692172	0.608123	0.565682	0.52248	0.63795	0.358186	0.532071	0.439053	0.709322	0.655503	0.783456	0.656397	0.507254	0.953743	0.601629	0.412783	0.559217	0.481645	0.698843	1.24725	0.63265	0.590762	0.575466	HSC_only
Kras	0.281626	0.398366	0.225839	0.332566	0.22515	0.209347	0.373446	0.0795412	0.252846	0.146082	0.456331	0.483261	0.448137	0.447066	0.214655	0	0.341788	0.143676	0.259722	0.162517	0.186703	0.467589	0.203716	0.274648	0.171873	HSC_only
Krtcap2	1.20552	1.3056	1.32132	1.42073	1.20348	1.0339	1.37815	1.15053	1.27205	1.07669	0.987152	1.08075	1.04632	0.981545	1.04943	0	1.24572	1.16519	1.22726	1.02886	1.11418	1.43626	0.945733	1.19388	1.06599	HSC_only
Lamtor1	0.585657	0.653427	0.554876	0.629986	0.559746	0.5014	0.707094	0.58742	0.586133	0.52341	0.533406	0.543189	0.453887	0.385379	0.555644	0	0.623226	0.595813	0.636337	0.577478	0.530692	0.354456	0.366947	0.531999	0.518135	HSC_only
Lamtor2	0.625139	0.833754	0.718641	0.676353	0.643836	0.664681	0.940438	0.443747	0.781862	0.646094	0.625114	0.541043	0.67171	0.239453	0.681772	1.43289	0.863928	0.633852	0.762109	0.647596	0.498906	0.898713	0.503507	0.671862	0.630028	HSC_only
Larp7	0.453227	0.632894	0.486452	0.543175	0.368273	0.367277	0.634118	0.345049	0.421616	0.324413	0.491853	0.545617	0.699854	0.554887	0.368177	0.953743	0.683502	0.320362	0.429583	0.322569	0.447307	0.550793	0.459293	0.509451	0.385234	HSC_only
Lin7c	0.267238	0.320369	0.486874	0.269931	0.220347	0.301845	0.287927	0.20546	0.273681	0.235081	0.553057	0.410551	0.435378	0.448519	0.31226	0	0.249518	0.276965	0.257525	0.259697	0.363374	0	0.3673	0.319439	0.295268	HSC_only
Lman2	0.581393	0.714001	0.502921	0.75729	0.583687	0.466544	0.623383	0.412457	0.50181	0.486553	0.707886	0.5225	0.669308	0.521301	0.475447	0.953743	0.537567	0.455217	0.57263	0.479775	0.454253	0.704924	0.430983	0.547268	0.467305	HSC_only
Lrp5	0.0446442	0.0761594	0.0776792	0.0443015	0.0498641	0.0617478	0.0728455	0.0280744	0.0638678	0.0624289	0.257194	0.254627	0.241693	0.257928	0.0593694	0	0.040377	0.0702884	0.0596627	0.0564099	0.105185	0	0.0672459	0.108625	0.062403	HSC_only
Lrrc8a	0.142589	0.204918	0.152329	0.107202	0.132571	0.158352	0.169149	0.104268	0.121277	0.133664	0.382091	0.286862	0.230394	0.326174	0.155476	0	0.112441	0.21502	0.128879	0.129768	0.189427	0	0.156567	0.172966	0.225402	HSC_only
Lsm3	0.726657	1.16509	0.847882	0.80038	0.710855	0.792146	1.31624	0.764072	0.934738	0.777899	0.739376	0.667098	0.79427	0.55043	0.802831	1.43289	1.25729	0.822829	0.928625	0.766974	0.76236	1.18186	0.560969	0.819775	0.704605	HSC_only
Lsp1	0.624418	0.82421	0.617298	0.549121	0.72107	0.748574	0.536671	0.676907	0.6496	0.759451	0.780777	0.985123	0.804697	1.0541	0.770858	0	0.66152	0.960645	0.649541	0.801415	0.716252	0.810381	0.640964	0.622868	0.731715	HSC_only
Lxn	0.265266	0.235477	0.118279	0.225832	0.240897	0.299337	0.331036	0.295148	0.29857	0.284403	0.158003	0.206303	0.269798	0.167489	0.297441	0	0.428605	0.29409	0.302591	0.300573	0.269512	0.208001	0.208812	0.304078	0.238752	HSC_only
Malat1	5.05718	4.33349	5.08136	4.81968	5.05567	5.09567	4.19566	5.11491	4.80799	5.06968	5.21554	5.0662	4.92924	5.07475	4.98977	4.19587	4.12939	5.03864	4.73962	5.00089	5.29583	4.36144	5.13341	5.15108	5.34982	HSC_only
Man1a	0.341662	0.388341	0.315445	0.288945	0.345244	0.339826	0.222977	0.261783	0.26995	0.330289	0.549378	0.459328	0.385167	0.598206	0.298096	0	0.312125	0.340713	0.248672	0.33189	0.363574	0.354456	0.468433	0.358993	0.465431	HSC_only
Mapkapk2	0.327285	0.456041	0.345202	0.338978	0.297399	0.260858	0.344826	0.483959	0.297248	0.238032	0.419582	0.48195	0.456027	0.4454	0.298351	0.953743	0.445365	0.426726	0.317171	0.27567	0.185204	0.550793	0.886928	0.316718	0.431146	HSC_only
Matr3	0.948737	0.988828	1.01621	0.984695	0.934358	0.885215	1.16322	0.890762	0.945505	0.879179	1.1191	1.14503	1.22117	1.17518	0.94996	1.43289	1.14034	0.781931	0.985888	0.917412	1.06073	0.90258	0.78548	1.03916	1.08192	HSC_only
Mbd2	0.530966	0.790841	0.544459	0.520951	0.473673	0.414405	0.554624	0.499601	0.422835	0.394472	0.565381	0.627433	0.575448	0.575363	0.4216	0.953743	0.585841	0.391056	0.416809	0.398957	0.495404	0.898713	0.618727	0.482306	0.446785	HSC_only
Mcm5	0.0798585	0.795779	0.0335076	0.228583	0.0748435	0.100294	0.850474	0.110469	0.338766	0.0672473	0.0986852	0.0865746	0.237523	0.0335932	0.0793688	0	0.744277	0.0415738	0.277839	0.0676818	0.0661647	0.908949	0.108215	0.226909	0.0670227	HSC_only
Mdh1	0.896409	1.17334	0.836306	1.00829	0.952475	0.96615	1.35411	1.08565	1.05992	0.990835	0.770596	0.820844	1.01438	0.803	1.01628	0.953743	1.2539	1.01349	1.11703	1.02112	0.869369	1.52624	0.796196	1.02902	0.954476	HSC_only
Mecp2	0.226514	0.175331	0.393948	0.237928	0.264988	0.259788	0.236536	0.196998	0.24201	0.244149	0.515135	0.327859	0.318807	0.326509	0.27125	0	0.27679	0.154519	0.241095	0.245026	0.327117	0	0.214279	0.292558	0.306744	HSC_only
Med13	0.221148	0.303919	0.139025	0.198526	0.195256	0.193064	0.192318	0.287174	0.176202	0.171298	0.282268	0.225153	0.267819	0.481044	0.221008	0	0.192004	0.294161	0.183425	0.192237	0.259798	0.550793	0.340865	0.22705	0.244742	HSC_only
Med13l	0.356464	0.246522	0.442528	0.288313	0.310901	0.351686	0.23005	0.277241	0.283917	0.288985	0.521592	0.437612	0.535204	0.497364	0.353154	0	0.298938	0.27768	0.271551	0.293394	0.453917	0.342792	0.417529	0.380965	0.413852	HSC_only
Meis1	1.41476	1.2295	1.24765	1.45581	1.40471	1.3439	1.28696	1.31151	1.35326	1.39753	1.32742	1.1217	1.28066	1.14119	1.27421	0.953743	1.16212	1.30313	1.37788	1.36519	1.34673	1.45171	0.884965	1.43494	1.45612	HSC_only
Minpp1	0.37215	0.382104	0.432582	0.443649	0.331327	0.324355	0.452682	0.409239	0.388651	0.317852	0.474969	0.561778	0.598982	0.319202	0.347714	0	0.419243	0.388833	0.374815	0.317285	0.302618	0.208001	0.532806	0.410079	0.364546	HSC_only
Mkln1	0.668785	0.578598	0.633447	0.591786	0.570991	0.642077	0.568058	0.532912	0.563838	0.531042	0.832299	0.753386	0.777622	0.749958	0.641832	0.953743	0.575332	0.55678	0.54829	0.552133	0.783592	0.550793	0.55137	0.613519	0.629544	HSC_only
Mlec	0.38099	0.688064	0.259846	0.555331	0.30073	0.371829	0.907823	0.385308	0.530549	0.306758	0.31932	0.267044	0.436192	0	0.375621	0.953743	0.834904	0.242588	0.519787	0.327312	0.358411	0.354456	0.236438	0.525858	0.238061	HSC_only
Morf4l1	1.71815	1.65704	1.60542	1.62164	1.58148	1.60413	1.57326	1.62037	1.51707	1.51944	1.88701	1.82694	1.7664	1.69496	1.60164	0.953743	1.57238	1.52541	1.57328	1.53385	1.87288	1.60406	1.64338	1.73297	1.75175	HSC_only
Mrpl12	0.745136	1.10632	0.527089	0.980139	0.627465	0.469989	0.869018	0.439049	0.747043	0.449589	0.382201	0.527074	0.64803	0.435766	0.478661	1.43289	0.81895	0.480867	0.742704	0.435402	0.308534	0.550793	0.330874	0.594376	0.451791	HSC_only
Mrpl13	0.478476	0.880866	0.283732	0.578128	0.43087	0.432965	0.77925	0.454277	0.574007	0.445972	0.351935	0.416756	0.407817	0.211691	0.462529	0	0.810467	0.441471	0.572619	0.431374	0.411986	0.980396	0.387106	0.499951	0.428523	HSC_only
Mrpl14	0.475035	0.835724	0.46322	0.537134	0.475234	0.499747	0.976035	0.599148	0.611766	0.514827	0.393251	0.342966	0.419249	0.272081	0.473161	0	0.933626	0.531717	0.570656	0.502633	0.47256	0.559788	0.36674	0.548518	0.459732	HSC_only
Mrpl18	0.488762	0.972898	0.495436	0.638879	0.462336	0.403494	1.03964	0.547179	0.644683	0.41533	0.307898	0.274984	0.35675	0.240298	0.397703	0	0.991698	0.554214	0.577978	0.418764	0.299094	1.15505	0.233115	0.568063	0.413217	HSC_only
Mrpl42	0.532764	0.798671	0.71593	0.687462	0.50486	0.526697	0.936219	0.407361	0.711036	0.515616	0.369564	0.357556	0.57994	0.421984	0.528664	1.43289	0.920813	0.563905	0.70086	0.509785	0.523179	0.810381	0.336232	0.621221	0.442148	HSC_only
Mrps12	0.525232	0.570213	0.58194	0.650155	0.498433	0.410169	0.647764	0.474402	0.517329	0.395345	0.318331	0.318933	0.421994	0.137921	0.40987	0.953743	0.738431	0.428364	0.501375	0.412433	0.423555	0.208001	0.311148	0.417381	0.36637	HSC_only
Mrps24	0.700044	0.966229	0.558689	0.881401	0.702257	0.599991	0.900048	0.650034	0.757155	0.607026	0.552389	0.566114	0.636758	0.376482	0.595548	0	0.828546	0.55314	0.773489	0.614097	0.604289	0.559788	0.506479	0.628896	0.544332	HSC_only
Msn	0.887251	0.94421	1.01279	0.819977	0.830763	0.76478	0.745018	0.962622	0.732836	0.771061	1.02078	1.02051	0.896329	1.10996	0.805413	0.953743	0.656853	0.856565	0.751303	0.763345	0.850818	1.24725	1.0541	0.799733	0.920348	HSC_only
Mvp	0.347228	0.171048	0.420549	0.2863	0.325666	0.29462	0.0765295	0.429418	0.243823	0.311348	0.392579	0.459238	0.380044	0.37139	0.306741	0	0.0634272	0.391866	0.272698	0.297982	0.431487	0	0.491662	0.278767	0.366791	HSC_only
N4bp2	0.332673	0.376399	0.193925	0.239101	0.293697	0.445475	0.34508	0.359787	0.364355	0.440586	0.790846	0.733768	0.509632	0.575128	0.436124	0	0.295137	0.217933	0.362819	0.407069	0.432924	0.752259	0.297704	0.465902	0.442079	HSC_only
Nab2	0.209007	0.218659	0.132052	0.188865	0.176105	0.161776	0.11276	0.100338	0.16787	0.166715	0.323954	0.374325	0.442096	0.238764	0.163404	0	0.122627	0.179363	0.18878	0.140948	0.22493	0	0.508717	0.193905	0.139172	HSC_only
Nasp	0.251497	1.03054	0.191454	0.415004	0.186365	0.13977	0.867539	0.383198	0.378214	0.123953	0.117844	0.115644	0.274524	0.126261	0.139222	0	0.977991	0.157151	0.330919	0.120121	0.153665	0.637604	0.211789	0.220856	0.136228	HSC_only
Ndufa12	0.903333	1.07624	0.907908	1.08621	0.84917	0.828292	1.03516	0.743236	0.978743	0.747678	0.652373	0.863265	0.940009	0.525114	0.793328	0.953743	1.00052	0.917321	0.939537	0.716689	0.870128	0.467589	0.780608	0.930253	0.724647	HSC_only
Ndufa4	1.38623	1.87853	1.41325	1.58157	1.415	1.36863	1.96784	1.44376	1.66706	1.39393	1.24894	1.40645	1.56671	1.37255	1.34286	0.953743	1.91773	1.56529	1.58679	1.38767	1.45695	2.14562	1.2991	1.5532	1.39818	HSC_only
Ndufa6	1.05624	1.02893	1.02082	0.921488	1.102	1.14189	1.06562	0.930806	1.05252	1.12978	1.31643	1.22686	1.12107	1.20367	1.09728	0.953743	1.11652	1.06851	0.995168	1.12605	1.23559	1.52624	1.06958	1.13199	1.24443	HSC_only
Ndufa8	0.790442	1.03339	1.05543	0.919114	0.81454	0.77682	1.02944	0.776663	0.892283	0.771791	0.689153	0.694426	0.830697	0.64817	0.77578	0	0.962529	0.727477	0.888921	0.779052	0.77863	0.90258	0.618409	0.822984	0.720098	HSC_only
Ndufab1	0.793081	1.10985	0.901264	1.00517	0.721731	0.729529	1.22112	0.739537	0.9315	0.671815	0.71325	0.626363	0.943621	0.473462	0.713219	0	1.26812	0.73031	0.912454	0.648845	0.561696	1.01185	0.671901	0.809975	0.597705	HSC_only
Ndufb10	0.921757	1.07735	0.624371	1.01897	0.937776	0.831491	1.11676	0.776387	0.939189	0.851021	0.614432	0.749187	0.832935	0.663548	0.892977	0.953743	0.96437	0.854443	0.98751	0.881204	0.706904	0.90258	0.66413	0.861079	0.80792	HSC_only
Nfkb1	0.543027	0.68854	0.609584	0.516357	0.557377	0.526511	0.597258	0.588508	0.538753	0.534762	0.726037	0.674044	0.780317	0.880784	0.550212	0	0.353691	0.567123	0.510829	0.530313	0.706551	0.810381	0.971831	0.637358	0.649063	HSC_only
Nfkbiz	0.305797	0.142204	0.663158	0.186207	0.209833	0.373736	0.115504	0.470335	0.234988	0.298819	0.524098	0.342567	0.427671	0.342207	0.343414	0	0.185939	0.238626	0.229616	0.253422	0.677319	0.544258	0.918293	0.440175	0.583685	HSC_only
Nhp2	0.845213	1.17955	0.865376	1.16601	0.725503	0.558027	0.901864	0.762724	0.888325	0.495957	0.457215	0.604103	0.677581	0.544409	0.561296	0	0.81321	0.567376	0.863189	0.503422	0.447489	1.10704	0.484529	0.691289	0.463183	HSC_only
Nkx2-3	0.909152	0.621694	0.809082	0.597211	0.801306	0.930922	0.611147	0.690525	0.654551	0.779919	1.11638	0.769279	0.887228	0.77082	0.962085	0.953743	0.604727	0.938061	0.677412	0.819739	0.959216	0.342792	0.701998	0.738565	0.899911	HSC_only
Nme1	0.921893	1.26345	0.738707	1.3685	0.839612	0.662242	1.31049	0.628053	1.14801	0.596001	0.538163	0.654747	1.09037	0.449762	0.662994	0	1.1945	0.582056	1.17295	0.597183	0.652249	0.764247	0.597531	0.890662	0.498674	HSC_only
Nop10	1.35595	1.43006	1.35987	1.6589	1.2856	1.14846	1.56393	1.25186	1.54891	1.13574	1.15373	1.22519	1.48488	0.778864	1.07577	0.953743	1.26745	1.14837	1.46922	1.06091	1.03115	1.43626	1.11732	1.47909	1.19211	HSC_only
Nop53	1.1366	0.915086	1.24465	1.0619	1.13179	1.17281	0.857345	1.06651	1.03857	1.11925	1.29832	1.3009	1.18103	1.16351	1.15868	1.43289	0.919202	1.1491	1.05959	1.14436	1.15791	1.26624	1.07492	1.0166	1.1599	HSC_only
Notch2	0.138547	0.215273	0.180696	0.112261	0.127533	0.191596	0.178427	0.175027	0.170517	0.186231	0.363876	0.347295	0.321809	0.361738	0.182018	0.953743	0.164639	0.178418	0.173306	0.1958	0.303313	0	0.247875	0.291599	0.31334	HSC_only
Npm1	2.76908	2.85151	2.60253	3.00947	2.70243	2.65913	3.00699	2.59359	2.88526	2.66442	2.48219	2.61275	2.77556	2.46948	2.68235	3.07917	2.90918	2.64383	2.90238	2.67099	2.65479	2.83759	2.50496	2.78001	2.53553	HSC_only
Npm3	0.662934	0.893104	0.864314	0.876988	0.610117	0.586227	0.912582	0.590316	0.808278	0.563526	0.476376	0.592628	0.759373	0.405975	0.606392	0.953743	0.919246	0.58272	0.813724	0.573846	0.574055	0.697248	0.496492	0.733193	0.520888	HSC_only
Nr1h2	0.45475	0.305228	0.503544	0.425928	0.367461	0.468282	0.395566	0.558642	0.417862	0.376428	0.302128	0.398142	0.37119	0.358171	0.477028	0.953743	0.482367	0.464841	0.42721	0.381847	0.53378	0.208001	0.41072	0.421203	0.366731	HSC_only
Nr4a1	1.05551	0.312574	0.400126	0.404212	0.194064	1.41191	0.705416	0.756426	0.664099	0.404082	0.977304	0.375041	0.578414	0.363093	1.46967	0.953743	0.909603	0.631449	0.651546	0.292522	1.15198	0.637604	0.259816	0.301274	0.205647	HSC_only
Nr4a2	0.766764	0.377386	0.450687	0.299687	0.148279	1.07706	0.460817	0.426806	0.516557	0.300811	0.401825	0.25939	0.389944	0.131408	1.1012	0	0.608636	0.522959	0.553259	0.222836	0.814295	1.24918	0.202025	0.355579	0.217124	HSC_only
Nrgn	1.1376	1.30833	1.03132	1.24141	1.16039	1.24912	1.55959	1.05767	1.36145	1.2388	1.09544	1.12884	1.11813	0.903878	1.32327	1.75548	1.43027	1.21201	1.427	1.35688	1.34523	1.45321	1.13413	1.42117	1.27114	HSC_only
Nsd3	0.434916	0.527385	0.731977	0.416024	0.418091	0.391985	0.451368	0.44644	0.394431	0.392354	0.628722	0.627541	0.554358	0.570627	0.440825	1.43289	0.569576	0.549863	0.41496	0.408533	0.621102	0.687464	1.03311	0.501753	0.517927	HSC_only
Nsmce4a	0.669756	1.02097	0.722094	0.75856	0.680537	0.614926	1.09701	0.814198	0.755827	0.611067	0.637471	0.704089	0.639745	0.593952	0.653155	1.43289	1.03327	0.628129	0.709353	0.640336	0.505886	1.43626	0.535785	0.657542	0.687365	HSC_only
Nsrp1	0.315927	0.376662	0.335081	0.319995	0.312814	0.360295	0.404271	0.268813	0.330797	0.302958	0.461936	0.467043	0.564875	0.352055	0.328923	0	0.290392	0.280508	0.31131	0.32546	0.433469	0	0.39462	0.344754	0.364306	HSC_only
Nt5c3	0.835536	0.877923	1.0703	0.849424	0.832692	0.734082	0.830993	0.934422	0.732642	0.740031	0.39762	0.420169	0.516026	0.343263	0.765364	0.953743	0.93077	1.0857	0.793987	0.840849	0.90089	0.559788	1.52039	0.924769	0.931466	HSC_only
Nup98	0.329634	0.393036	0.319224	0.294764	0.266218	0.326279	0.320982	0.324551	0.274019	0.216517	0.43018	0.45205	0.515091	0.200982	0.336975	0	0.338978	0.296159	0.285644	0.217774	0.311854	0.550793	0.551351	0.31217	0.290171	HSC_only
Oxa1l	0.415739	0.456976	0.461084	0.402559	0.421383	0.434127	0.452566	0.403353	0.422216	0.418262	0.303632	0.384699	0.424697	0.305424	0.450403	0.953743	0.537649	0.373104	0.443088	0.450463	0.509168	0.354456	0.345713	0.429474	0.332575	HSC_only
Pag1	0.288994	0.272043	0.22737	0.236822	0.200959	0.280486	0.239518	0.212891	0.223767	0.194467	0.351277	0.340499	0.387595	0.334884	0.291489	0	0.217073	0.217338	0.227786	0.191038	0.226665	0.208001	0.154782	0.220828	0.179909	HSC_only
Paics	0.642934	1.08373	0.858683	0.750208	0.588577	0.559905	1.04372	0.462879	0.757659	0.552724	0.512919	0.470985	0.707347	0.606508	0.632363	0	1.17024	0.595894	0.785806	0.598407	0.609102	0.898713	0.572985	0.708274	0.549165	HSC_only
Park7	1.39457	1.63017	1.43882	1.59141	1.37342	1.37	1.64735	1.5414	1.63315	1.36347	1.28817	1.31869	1.51795	1.13443	1.41569	2.19467	1.5088	1.41038	1.64684	1.42182	1.32013	0.980396	1.19212	1.51192	1.30856	HSC_only
Pdlim1	0.537399	0.716844	0.515493	0.560982	0.53304	0.535181	0.702427	0.479844	0.568959	0.479773	0.561398	0.493862	0.398679	0.352228	0.549877	0.953743	0.771463	0.560372	0.555342	0.488668	0.566959	1.15505	0.67718	0.556594	0.475894	HSC_only
Pfkfb3	0.0617631	0.0571358	0.2963	0.0537831	0.0612852	0.0656499	0.0458295	0.122462	0.0697415	0.0447083	0.395281	0.400079	0.304238	0.376666	0.067431	0	0.01904	0.156835	0.0765264	0.0585468	0.222349	0	0.739645	0.077293	0.111606	HSC_only
Pfn1	2.29956	2.70265	2.32154	2.51925	2.2059	2.12291	2.57397	2.09812	2.47742	2.0419	2.03717	2.08853	2.37023	1.93769	2.1319	3.00295	2.6143	2.00194	2.49723	2.06998	1.96906	2.38191	1.91642	2.2931	1.9195	HSC_only
Pgls	0.873384	1.14721	1.02905	1.03953	0.784011	0.713521	1.1257	0.862342	0.977468	0.734019	0.602815	0.79809	0.850629	0.525798	0.776067	1.43289	1.14047	0.788192	0.9775	0.756018	0.707523	0.559788	0.603596	0.858682	0.685671	HSC_only
Pla2g16	0.610577	0.713205	1.0205	0.600771	0.601995	0.66593	0.849038	0.93632	0.727101	0.694067	0.56592	0.54234	0.606351	0.394045	0.706868	0.953743	0.832304	0.973742	0.729145	0.702855	0.550986	0.898713	0.7697	0.622409	0.591323	HSC_only
Plekho2	0.193029	0.326774	0.285214	0.18433	0.188296	0.260903	0.20781	0.230412	0.217044	0.193719	0.448541	0.425615	0.387277	0.303586	0.266065	0	0.326418	0.275392	0.220674	0.208987	0.312287	0	0.475495	0.223415	0.294475	HSC_only
Plscr1	0.275051	0.561765	0.299303	0.251432	0.295554	0.287631	0.327798	0.2043	0.241943	0.249727	0.524698	0.417118	0.502185	0.241091	0.301043	0	0.308538	0.38504	0.278578	0.262475	0.528218	0.752259	1.44001	0.396233	0.383998	HSC_only
Pnrc1	1.61004	0.95347	1.23321	1.11986	1.41069	1.78373	1.09208	1.69056	1.31369	1.4733	1.77415	1.54788	1.45972	1.62985	1.85334	1.75548	1.13828	1.46752	1.36666	1.46727	1.76186	1.09756	1.71262	1.40919	1.58625	HSC_only
Polr1d	1.146	1.37257	0.984682	1.25349	1.06674	1.07178	1.29695	1.09686	1.1551	1.00069	0.881612	1.07624	1.07525	0.782563	1.08063	0	1.17275	0.940328	1.15586	0.999337	0.972665	1.15505	0.947509	1.06595	0.874201	HSC_only
Polr2e	0.794904	0.748122	0.613429	0.934134	0.758713	0.737936	0.890481	0.629085	0.922686	0.730588	0.545829	0.660094	0.666446	0.736943	0.701806	0.953743	0.706705	0.735531	0.890764	0.715664	0.661438	0.467589	0.480542	0.769507	0.670214	HSC_only
Polr2f	0.747856	0.937672	0.807298	0.919391	0.7138	0.67368	1.08006	0.612105	0.898162	0.677903	0.56028	0.646948	0.851198	0.646037	0.65548	0.953743	1.01179	0.668029	0.853173	0.652785	0.713392	0.354456	0.588325	0.779963	0.649614	HSC_only
Polr2j	0.674378	0.869273	0.65693	0.805635	0.674579	0.610188	0.875576	0.750261	0.74876	0.63607	0.488391	0.457547	0.669311	0.3905	0.608932	0	0.928594	0.532675	0.704756	0.609623	0.444903	1.01185	0.485834	0.673419	0.523528	HSC_only
Pop5	0.415025	0.472546	0.279026	0.494218	0.369841	0.311702	0.484953	0.338741	0.416896	0.325382	0.168481	0.207106	0.258091	0.107771	0.321571	0	0.49547	0.314992	0.397199	0.292349	0.333863	0.354456	0.220041	0.377832	0.258096	HSC_only
Ppa1	0.770721	0.926864	1.49185	1.11344	0.695456	0.611259	1.04262	1.28064	0.956371	0.545415	0.485154	0.580667	0.82921	0.303326	0.65642	0	0.998964	1.21452	0.964349	0.590899	0.764606	1.01185	1.74811	0.94689	0.603834	HSC_only
Ppia	3.13611	3.65394	3.16256	3.32507	3.11488	3.0935	3.69069	3.12065	3.3769	3.08035	2.84396	3.02682	3.2182	2.98008	3.10269	2.622	3.69189	3.05891	3.37853	3.09169	2.85862	3.16274	2.83833	3.17485	2.90151	HSC_only
Ppil1	0.194242	0.54432	0.268734	0.30842	0.219796	0.208838	0.734102	0.201719	0.339349	0.207009	0.191783	0.157096	0.176334	0.0639165	0.196983	0	0.513919	0.183058	0.322595	0.199836	0.183269	0.90258	0.0834124	0.275993	0.193777	HSC_only
Ppm1a	0.453707	0.479622	0.545398	0.416938	0.418309	0.387614	0.36642	0.536469	0.334448	0.35002	0.584061	0.590582	0.479344	0.680651	0.411682	0	0.363985	0.438447	0.386424	0.386623	0.431693	0.467589	0.304745	0.429754	0.466326	HSC_only
Ppp1ca	1.02942	1.55683	0.763248	1.16744	1.0421	0.995699	1.47779	0.851775	1.19761	1.01355	0.947943	0.951386	1.11585	0.791502	1.02478	1.43289	1.45699	0.88776	1.17719	1.02813	0.896408	1.3085	0.843307	1.10932	0.950771	HSC_only
Ppp1r14b	0.943796	0.932556	0.840094	1.2613	0.816918	0.712007	0.905271	0.565847	1.05685	0.637557	0.524127	0.85872	1.0686	0.321348	0.682747	0.953743	0.837894	0.664403	1.05974	0.618971	0.57429	0.810381	0.460517	0.882527	0.598489	HSC_only
Ppp1r15a	1.30316	0.530296	1.27047	0.795471	0.88886	1.36764	0.686442	0.862954	0.897982	0.961515	0.938525	0.686041	0.653739	0.652404	1.49395	1.43289	0.736387	1.06924	0.962327	0.989089	1.18794	1.44935	0.900011	0.928227	0.850464	HSC_only
Ppp3ca	0.621535	0.518429	0.609989	0.539746	0.658104	0.639276	0.37883	0.605239	0.582912	0.613649	0.895101	0.8588	0.795276	0.876223	0.652877	0.953743	0.392532	0.852672	0.545586	0.678778	0.794026	0.752259	0.823767	0.704195	0.803853	HSC_only
Prdx1	1.49369	1.92212	1.46341	1.7643	1.50747	1.30016	1.82505	1.31381	1.6313	1.31476	1.17698	1.33355	1.46948	1.0251	1.3426	2.19467	1.83338	1.3932	1.67523	1.35194	1.40442	1.83873	1.37161	1.52804	1.29703	HSC_only
Prdx2	1.41324	1.57904	1.31325	1.50066	1.3169	1.41833	1.68015	1.29039	1.59175	1.43855	1.30747	1.31189	1.535	1.01787	1.41123	1.75548	1.68754	1.43209	1.57678	1.40324	1.3162	1.66386	1.17667	1.40069	1.29648	HSC_only
Prdx4	0.476488	1.03741	0.373473	0.525444	0.537592	0.45508	1.1476	0.455321	0.57993	0.490803	0.454617	0.440191	0.500241	0.394962	0.445986	0.953743	1.04017	0.588921	0.518976	0.452481	0.503085	0.559788	0.417434	0.489432	0.488031	HSC_only
Prkar2b	0.353041	0.437561	0.156749	0.39264	0.305006	0.343564	0.397337	0.299032	0.375096	0.297167	0.415541	0.494834	0.594801	0.353075	0.323041	0.953743	0.285306	0.403349	0.381149	0.301412	0.380002	0	0.3195	0.374326	0.393623	HSC_only
Prkch	0.227646	0.266327	0.125468	0.208755	0.20203	0.267869	0.236519	0.172558	0.238611	0.235402	0.591494	0.492841	0.488033	0.627342	0.272124	0	0.248727	0.158515	0.242829	0.236289	0.338079	0.550793	0.251418	0.297391	0.281927	HSC_only
Prnp	0.136048	0.0848393	0.162629	0.118305	0.163924	0.161887	0.0896579	0.137635	0.125783	0.176356	0.335753	0.388396	0.234011	0.272164	0.152122	0	0.110323	0.159045	0.140527	0.165325	0.155402	0.208001	0.169117	0.126698	0.206483	HSC_only
Procr	0.757586	0.186137	0.573589	0.548522	0.874539	0.81021	0.309276	0.73501	0.612382	0.930082	0.9536	1.0058	0.789799	1.0276	0.808551	1.43289	0.24972	0.789929	0.583509	0.924914	0.775892	0	0.516783	0.63882	0.931306	HSC_only
Psma4	1.08901	1.32487	1.20985	1.30045	1.04274	0.90245	1.25414	1.05278	1.16005	0.894727	0.82448	0.886899	1.14027	0.755981	0.935706	1.43289	1.25693	1.17894	1.12995	0.867495	0.807603	1.5629	1.07335	1.08465	0.952936	HSC_only
Psma5	0.942654	0.969714	1.15876	1.02928	0.85354	0.812927	1.20582	1.15401	0.965326	0.796688	0.705211	0.726416	0.958394	0.542849	0.843738	0	1.11419	1.06052	0.978309	0.817544	0.829785	0.354456	0.963425	0.865675	0.711686	HSC_only
Psma7	1.49077	1.60161	1.71757	1.69441	1.38744	1.24726	1.6094	1.35773	1.50354	1.20174	1.0524	1.2821	1.48973	1.21785	1.23484	1.43289	1.37972	1.40638	1.49411	1.20449	1.12559	0.90258	1.24996	1.31786	1.09172	HSC_only
Psmb10	0.866724	0.873216	1.31791	0.983406	0.831584	0.788876	0.77624	1.37897	0.949665	0.794881	0.620384	0.687971	0.781211	0.706706	0.807452	0.953743	0.798034	1.2551	0.97358	0.797115	0.741585	0.354456	1.11197	0.850396	0.774206	HSC_only
Psmb5	0.923985	1.11132	0.81816	1.16165	0.844578	0.700886	1.19428	0.703588	0.997862	0.719734	0.669569	0.748302	0.875794	0.495743	0.713639	0.953743	1.10542	0.749456	0.97212	0.713246	0.766874	0.810381	0.669578	0.96486	0.650975	HSC_only
Psmb6	1.10524	1.29134	0.737156	1.22742	1.03697	0.897878	1.27081	1.01068	1.05426	0.892162	0.846703	0.82793	1.00797	0.712235	0.929319	1.43289	1.26267	0.97943	1.08033	0.889229	0.934796	1.3085	0.863625	0.958613	0.724319	HSC_only
Psmb9	0.710957	1.15484	1.3567	0.744976	0.751243	0.893281	1.29306	1.39354	0.990647	0.89941	0.721203	0.719315	0.744202	0.734933	0.903051	1.75548	1.23332	1.38143	0.981687	0.936162	0.85228	1.18186	1.25901	0.879925	0.797108	HSC_only
Psmd7	0.955551	1.13188	0.942263	1.15349	0.857063	0.725191	1.01457	0.825703	0.942758	0.686445	0.628195	0.754255	0.944756	0.439437	0.730505	1.43289	1.0187	0.670747	0.945336	0.689051	0.668743	1.26624	0.820796	0.861024	0.724427	HSC_only
Ptp4a2	1.07315	1.27068	1.07407	1.08889	1.03939	1.06269	1.19062	1.08801	1.09282	1.03307	1.23896	1.30811	1.22093	1.57012	1.05774	0.953743	1.07628	0.945928	1.06047	1.02023	1.23072	1.04772	1.02595	1.14379	1.1064	HSC_only
Puf60	1.02366	1.0475	0.92904	0.986609	0.861249	0.782426	0.881301	0.778168	0.747516	0.671348	0.684378	0.560432	0.613061	0.556045	0.960919	1.43289	0.908657	0.879388	0.947935	0.834328	0.941942	0.467589	0.638293	0.78476	0.76797	HSC_only
Pycard	0.470125	0.619316	0.418164	0.497234	0.471306	0.470599	0.769909	0.505408	0.561147	0.453586	0.309451	0.251577	0.299131	0.219559	0.498374	0	0.777183	0.700453	0.553394	0.510023	0.479332	0.637604	0.335096	0.432056	0.458427	HSC_only
Qk	0.437848	0.627971	0.445576	0.396248	0.38439	0.373774	0.399182	0.352364	0.353085	0.33624	0.57991	0.47082	0.510354	0.63241	0.35412	0	0.528727	0.346201	0.36967	0.331683	0.362955	0.342792	0.4635	0.472936	0.431579	HSC_only
Rab18	0.667106	0.688543	0.767237	0.697012	0.616416	0.495695	0.56592	0.61941	0.519296	0.483925	0.698263	0.688331	0.735043	0.818014	0.506085	0	0.456427	0.605061	0.535089	0.501533	0.657422	0.697248	0.887704	0.59729	0.650298	HSC_only
Rab1a	0.474939	0.498063	0.353204	0.502668	0.447918	0.398283	0.462544	0.440003	0.391031	0.369879	0.574226	0.399388	0.610059	0.450652	0.421489	0	0.496711	0.328706	0.390906	0.373794	0.383871	0.467589	0.422504	0.448584	0.467205	HSC_only
Rab2a	0.859444	0.796864	0.857596	0.891646	0.785139	0.755616	0.822245	0.849672	0.756734	0.738056	0.985947	0.918244	0.912158	0.666692	0.779685	0	0.767484	0.689658	0.797269	0.743138	0.84705	1.15505	0.807866	0.781603	0.742283	HSC_only
Rab38	1.15305	1.09104	1.48099	1.14359	1.21778	1.01192	0.986466	1.179	1.02284	1.0874	0.784449	0.661536	0.867511	0.53934	1.07046	0.953743	0.972464	1.28988	1.01665	1.1354	1.02597	0.90258	0.932043	1.05197	1.17036	HSC_only
Rab7	0.585379	0.60318	0.60166	0.621804	0.566986	0.534892	0.676964	0.625271	0.553488	0.521918	0.652909	0.841392	0.749563	0.816817	0.547922	0	0.54311	0.596464	0.580119	0.525707	0.570016	1.00666	0.700549	0.588637	0.559391	HSC_only
Rab8b	0.213987	0.16702	0.145194	0.188184	0.186887	0.219515	0.182259	0.308753	0.196253	0.193403	0.418527	0.436493	0.456179	0.337882	0.244656	0	0.273611	0.230947	0.200632	0.208692	0.181458	0	0.404433	0.220752	0.234009	HSC_only
Ran	1.65675	2.47536	1.8266	2.10941	1.49471	1.33177	2.54816	1.33683	1.915	1.25618	1.24096	1.31982	1.7079	1.17388	1.32797	1.99899	2.4842	1.40166	1.86611	1.27668	1.08105	2.26856	1.23437	1.6174	1.13113	HSC_only
Ranbp1	1.09002	1.44827	0.900996	1.48363	0.950366	0.845195	1.56941	0.960134	1.30113	0.738375	0.841579	0.985087	1.19543	0.663872	0.830734	0	1.62286	0.776977	1.2724	0.721545	0.785142	1.11254	0.97177	1.20006	0.733144	HSC_only
Rap1b	0.990647	1.02216	1.08435	1.05883	0.9545	0.834007	0.876916	0.871399	0.860301	0.757738	1.08836	1.05037	0.953324	0.871148	0.861108	0	0.953449	0.956715	0.881458	0.774808	0.830107	0.704924	1.12452	0.948764	0.839912	HSC_only
Rasd1	0.0871018	0.045187	0.0459124	0.035846	0.0390642	0.0709487	0.0545439	0.104847	0.0246705	0.0472093	0.242554	0.29773	0.161383	0.170082	0.0616901	0	0.0751342	0.0116347	0.0290837	0.0333992	0.167572	0.208001	0.128039	0.0445674	0.0605309	HSC_only
Rbbp6	0.858096	0.800597	0.883787	0.788357	0.732706	0.813697	0.693472	0.765581	0.75445	0.693819	1.01694	0.947863	0.967075	0.860519	0.853479	1.75548	0.714661	0.726819	0.779484	0.689503	1.00463	0.544258	0.675453	0.754848	0.781265	HSC_only
Rexo2	0.646608	0.731318	0.629117	0.878255	0.568208	0.433837	0.660519	0.508415	0.68096	0.433323	0.385046	0.42611	0.601769	0.422079	0.447866	0.953743	0.565197	0.453467	0.654139	0.42055	0.449761	0.559788	0.426542	0.604551	0.37227	HSC_only
Rfc5	0.201071	0.688563	0.271662	0.2704	0.187474	0.174137	0.825529	0.218436	0.33125	0.162168	0.110168	0.168899	0.221476	0.111471	0.175954	0	0.704541	0.239966	0.281914	0.182838	0.29312	0.467589	0.241552	0.296675	0.223393	HSC_only
Rgs18	0.909515	0.871975	0.998143	0.858781	0.940595	0.928495	1.04486	0.936242	0.916385	0.972137	1.01509	0.65953	0.9507	0.613335	0.894246	0.953743	1.02997	0.881674	0.891729	0.973987	1.08532	1.01185	0.767763	1.0584	1.07792	HSC_only
Rnaseh2c	0.51533	1.16034	0.440161	0.622945	0.540532	0.521694	1.15459	0.398088	0.71316	0.549319	0.494498	0.451548	0.574103	0.27533	0.501484	0.953743	1.13391	0.521036	0.703274	0.511755	0.427934	0.354456	0.396262	0.486811	0.476124	HSC_only
Rnf139	0.228284	0.320734	0.280058	0.199063	0.17677	0.205317	0.170617	0.284733	0.206093	0.170849	0.42948	0.400913	0.33228	0.40102	0.235154	0.953743	0.241619	0.245305	0.192909	0.167036	0.365775	0.342792	0.47029	0.207443	0.195418	HSC_only
Rpa2	0.237691	0.788181	0.16681	0.357656	0.228431	0.213678	0.895093	0.260348	0.409002	0.221133	0.188069	0.174876	0.302014	0.330376	0.214131	0	0.846328	0.142152	0.380694	0.235315	0.201086	0.354456	0.153738	0.319196	0.189909	HSC_only
Rpl10a	3.54684	3.38511	3.46631	3.56944	3.57661	3.58012	3.49659	3.50556	3.62788	3.62187	3.38787	3.4999	3.45995	3.44854	3.60083	3.14998	3.50125	3.57737	3.65943	3.63001	3.40016	3.47629	3.31732	3.50705	3.46904	HSC_only
Rpl12	3.67401	3.47414	3.60554	3.67918	3.70168	3.74896	3.59308	3.7461	3.77685	3.80063	3.54697	3.67473	3.65912	3.65678	3.74537	3.74905	3.55666	3.76262	3.79372	3.79054	3.53214	3.58435	3.51062	3.6557	3.63058	HSC_only
Rpl13	4.51555	4.26714	4.41296	4.51012	4.5691	4.4899	4.29565	4.47609	4.51573	4.5711	4.23141	4.37731	4.30591	4.42531	4.53583	4.84448	4.31239	4.60662	4.57041	4.6087	4.28056	4.38616	4.27072	4.3667	4.40904	HSC_only
Rpl13a	1.25269	1.52916	1.1426	1.34468	1.31753	1.31341	1.46822	1.24037	1.42287	1.3167	1.50056	1.65481	1.64298	1.74134	1.30327	0.953743	1.29795	1.22184	1.38954	1.32178	1.54367	1.5629	1.57595	1.66017	1.63341	HSC_only
Rpl14	3.51194	3.54908	3.506	3.57549	3.55547	3.54934	3.58976	3.52806	3.63475	3.60568	3.36338	3.5056	3.47773	3.44215	3.53887	3.82147	3.5481	3.51687	3.62348	3.60219	3.35223	3.43618	3.32412	3.46796	3.44127	HSC_only
Rpl15	3.6569	3.63927	3.59987	3.69372	3.65016	3.63577	3.68277	3.56496	3.72095	3.66819	3.39239	3.54668	3.58527	3.48248	3.65168	3.54106	3.67185	3.64722	3.73189	3.66655	3.44854	3.46878	3.40944	3.53677	3.47076	HSC_only
Rpl18	3.63978	3.5339	3.51756	3.66653	3.66287	3.61597	3.54604	3.60128	3.66356	3.64649	3.40732	3.48791	3.48716	3.48208	3.61754	3.95226	3.54882	3.59865	3.68042	3.64331	3.42594	3.5615	3.3624	3.48541	3.45781	HSC_only
Rpl18a	4.03539	3.80751	3.98292	4.01587	4.08654	4.06096	3.85643	4.02377	4.04225	4.10232	3.84258	3.94738	3.85688	3.98948	4.07696	4.39161	3.8935	4.12855	4.07606	4.10917	3.87627	4.1017	3.80793	3.9107	3.95021	HSC_only
Rpl27	1.47023	1.47163	1.54102	1.59353	1.50022	1.5696	1.6013	1.82716	1.67002	1.59302	1.89998	1.94224	1.98309	1.90764	1.64312	1.75548	1.59051	1.73565	1.75598	1.65511	1.9199	1.81969	1.85522	1.98018	1.94962	HSC_only
Rpl7a	2.88465	2.91899	2.79659	2.91179	2.89437	2.90718	2.91594	2.89635	2.97125	2.93994	2.74238	2.84779	2.83238	2.80154	2.91516	3.00295	2.96817	2.91207	2.96817	2.9361	2.82078	2.80057	2.7055	2.84326	2.81875	HSC_only
Rplp0	3.99048	3.83692	3.87367	4.01784	4.01753	3.98246	3.9449	3.97895	4.03762	4.00664	3.73221	3.91599	3.84511	3.77755	4.03579	4.01176	3.94766	4.01697	4.09631	4.06259	3.84479	3.89448	3.76158	3.94053	3.90849	HSC_only
Rps14	4.12738	3.75033	4.05579	4.06856	4.16054	4.19608	3.90301	4.13233	4.14902	4.25473	3.93664	4.03326	3.91955	4.09685	4.18493	4.48579	3.86841	4.23521	4.16243	4.24358	3.97158	3.94944	3.90112	4.00034	4.07411	HSC_only
Rps27rt	0.485836	0.303617	0.555521	0.483034	0.557179	0.711614	0.511362	0.639368	0.652868	0.724199	0.916435	0.847648	0.795129	0.755509	0.701452	0	0.526529	0.815892	0.673539	0.728947	0.744241	0.898713	0.75291	0.805544	0.887652	HSC_only
Rps4x	4.26256	4.12915	4.1863	4.25088	4.34171	4.30754	4.2208	4.27882	4.32172	4.3758	4.12537	4.25104	4.17669	4.28252	4.32604	4.3093	4.25156	4.35406	4.34218	4.39858	4.1556	4.22511	4.08489	4.19015	4.23864	HSC_only
Rps6	3.62289	3.56991	3.58547	3.71901	3.66754	3.70853	3.66103	3.78612	3.81222	3.76396	3.48557	3.63961	3.64434	3.60519	3.68124	3.82147	3.66756	3.67942	3.78892	3.72723	3.48282	3.48145	3.48952	3.59034	3.57841	HSC_only
Rps9	4.03539	3.75494	3.86182	3.98465	4.07479	4.05337	3.74457	4.02864	4.01931	4.10146	3.83252	3.92926	3.85006	3.91007	4.05211	3.95226	3.74305	4.03917	4.03297	4.104	3.89431	3.8257	3.82322	3.87456	3.93801	HSC_only
Rpsa	4.00834	4.12276	3.96628	4.09551	4.02698	4.04235	4.15496	4.0086	4.16151	4.06127	3.83899	3.98549	4.01869	3.92687	4.03424	4.17156	4.18685	3.98588	4.16414	4.05229	3.8502	4.08875	3.79749	3.98198	3.90843	HSC_only
Sae1	0.427969	0.899748	0.395797	0.593155	0.369228	0.383177	0.996485	0.29279	0.573398	0.39785	0.320003	0.373697	0.491167	0.266162	0.399563	0	0.931322	0.415003	0.539183	0.373496	0.455836	0.90258	0.317292	0.514214	0.395923	HSC_only
Sap18	0.426301	0.449122	0.523441	0.486427	0.387987	0.380228	0.607878	0.399462	0.417317	0.338698	0.421148	0.521846	0.664425	0.4114	0.391474	0.953743	0.561381	0.594834	0.43353	0.367872	0.582715	0.697248	0.424988	0.501235	0.407422	HSC_only
Sdf2	0.501272	0.486262	0.547727	0.509403	0.521399	0.489597	0.505935	0.40154	0.496555	0.547199	0.349307	0.411193	0.414142	0.387518	0.492369	0.953743	0.456028	0.490966	0.477728	0.502334	0.536584	0.697248	0.456543	0.512556	0.466427	HSC_only
Selenop	0.669789	0.591573	0.618517	0.539267	0.746523	0.771812	0.623444	0.673638	0.590061	0.825148	0.98407	0.802789	0.648973	0.809653	0.80338	1.43289	0.56184	0.731555	0.626161	0.87632	0.962957	0.342792	0.699452	0.678085	0.927322	HSC_only
Serinc1	0.562761	0.445455	0.278823	0.411171	0.475873	0.633206	0.43429	0.46011	0.455674	0.496952	0.771594	0.692648	0.656169	0.738827	0.642764	0	0.427361	0.462092	0.474039	0.498515	0.739912	0.550793	0.616351	0.543214	0.673068	HSC_only
Serinc3	1.85796	1.9681	1.92139	1.70492	1.8227	1.8339	2.01831	1.88419	1.7501	1.80512	2.03937	1.88588	1.86037	2.06122	1.82641	1.75548	1.99462	1.86424	1.73352	1.80407	2.03508	1.98225	2.09504	1.97721	1.99104	HSC_only
Sf3a3	0.496191	0.82385	0.441971	0.560597	0.454247	0.408875	0.742572	0.365925	0.520285	0.366685	0.399427	0.438592	0.399453	0.344763	0.400447	0	0.763793	0.458321	0.509459	0.38859	0.412954	0.697248	0.390583	0.51301	0.408676	HSC_only
Sf3b1	1.28992	1.34113	1.07413	1.32658	1.18213	1.14596	1.31808	1.11121	1.13127	1.00516	1.21647	1.22513	1.35808	1.25298	1.18109	1.75548	1.23552	1.12849	1.15785	1.05433	1.21823	1.01185	1.20588	1.25293	1.12757	HSC_only
Sf3b5	0.776798	1.17245	0.99689	0.882448	0.749197	0.750694	1.22657	0.810556	0.864526	0.745956	0.632004	0.629797	0.781873	0.477462	0.721334	0.953743	1.15499	0.73118	0.865758	0.739237	0.68193	0.697248	0.578326	0.754885	0.663387	HSC_only
Sfxn1	0.397283	0.495682	0.344436	0.620668	0.427199	0.407059	0.624779	0.461471	0.60923	0.403701	0.358274	0.397355	0.48055	0.306005	0.400212	1.43289	0.703702	0.440041	0.596508	0.396233	0.429873	0.559788	0.255816	0.547827	0.33797	HSC_only
Sgk1	0.0578837	0.0184654	0	0.0260109	0.0226615	0.0840773	0.0415214	0.0443134	0.0366178	0.0239325	0.344105	0.226064	0.104351	0.222456	0.0831243	0	0.037428	0	0.0232641	0.0233342	0.0321454	0.544258	0.042456	0.0351784	0.0493402	HSC_only
Shisa5	1.19849	0.752662	1.77635	1.03202	1.30194	1.27529	0.631133	2.12167	1.12611	1.40964	1.42575	1.37943	1.22709	1.76869	1.30011	1.75548	0.648726	1.93292	1.11355	1.37725	1.41503	0.559788	2.09436	1.29313	1.47997	HSC_only
Siva1	0.533605	1.31136	0.499742	0.707664	0.522404	0.575794	1.30204	0.476869	0.778712	0.532121	0.519504	0.557763	0.630004	0.395253	0.555909	0.953743	1.23444	0.458721	0.765776	0.536096	0.405287	0.704924	0.429934	0.614156	0.496334	HSC_only
Ski	0.241072	0.098375	0.244122	0.217277	0.294551	0.229777	0.199433	0.346226	0.194201	0.218764	0.42906	0.401236	0.338116	0.538627	0.239953	0	0.199954	0.11707	0.206337	0.207174	0.259701	0	0.314427	0.281492	0.273787	HSC_only
Slbp	0.290063	1.1069	0.564651	0.38067	0.314669	0.319331	1.11198	0.368413	0.484567	0.305192	0.444851	0.303878	0.367692	0.425623	0.333157	0.953743	0.988699	0.289236	0.443614	0.327925	0.356666	0.764247	0.31534	0.359008	0.329185	HSC_only
Slc25a4	1.05626	1.08025	0.973119	1.02957	0.969714	1.09719	1.13675	1.07588	1.16818	1.0425	0.983855	1.0345	0.995064	1.15539	1.07689	0.953743	1.05196	1.03665	1.13928	1.03396	1.08807	0.980396	0.829448	1.08966	1.0631	HSC_only
Slc25a5	1.38261	1.68538	1.20604	1.82291	1.16089	1.18507	1.76429	1.05628	1.57383	0.977829	1.09753	1.27398	1.58031	0.949419	1.17756	1.99899	1.88144	1.13544	1.54683	0.983576	1.12274	0.764247	0.964461	1.35363	0.863622	HSC_only
Slc44a2	0.273256	0.267563	0.221452	0.235122	0.261874	0.271647	0.27009	0.274501	0.268576	0.308287	0.576366	0.590973	0.510702	0.450881	0.25879	0	0.294858	0.269431	0.261086	0.311691	0.356946	0.342792	0.173668	0.272678	0.307305	HSC_only
Slfn2	0.272189	0.282047	0.644111	0.299968	0.380097	0.298977	0.262508	0.972973	0.41344	0.411929	0.0762296	0.104007	0.107928	0.121162	0.281618	0	0.0597788	0.842457	0.30613	0.339087	0.640758	0.208001	1.88068	0.863128	0.803281	HSC_only
Smc1a	1.06799	1.37402	1.06036	1.08129	0.963324	1.01038	1.45129	0.913932	1.08252	0.963039	1.08564	0.994957	0.994049	0.978797	0.994447	0	1.31057	0.8531	1.06087	0.953903	1.01463	1.52717	1.02027	1.10889	0.9901	HSC_only
Smc3	0.688098	1.05213	0.686809	0.716653	0.607833	0.630087	1.1157	0.543374	0.72865	0.593823	0.700296	0.534574	0.632532	0.569901	0.618313	0	1.06626	0.462852	0.704289	0.591283	0.698804	1.60406	0.50877	0.650012	0.7339	HSC_only
Smpdl3a	0.822132	0.550714	0.573141	0.609387	0.94306	0.999682	0.663627	1.10152	0.778994	1.10289	1.12291	1.07514	0.894561	1.18322	1.03693	0	0.653801	1.16688	0.79619	1.11394	1.15951	1.09756	0.92424	0.890581	1.15559	HSC_only
Snhg12	0.774413	0.469039	0.742679	0.796928	0.743972	0.726369	0.553931	0.665798	0.727347	0.704104	0.53318	0.600656	0.65905	0.573263	0.724416	1.75548	0.667158	0.551543	0.735998	0.707015	0.673019	0.90258	0.618844	0.669095	0.651412	HSC_only
Snrpd1	1.02961	1.68295	0.93878	1.31412	0.956165	0.845218	1.68004	0.956042	1.19796	0.760229	0.812429	0.980391	1.19465	0.718932	0.82232	1.43289	1.64382	0.867596	1.13719	0.728224	0.804533	0.986392	0.82598	1.03671	0.738464	HSC_only
Son	1.18858	1.25324	1.35266	1.17434	1.1275	1.04246	1.00389	0.973141	1.0047	0.967477	1.4082	1.26405	1.25071	1.26916	1.07494	0.953743	0.984619	1.01773	0.978411	0.95266	1.35372	0.354456	1.23928	1.23693	1.30545	HSC_only
Spi1	0.6896	0.5544	0.672985	0.78336	0.627506	0.468495	0.45492	0.490927	0.478226	0.487441	0.666178	0.608566	0.724344	0.453829	0.520397	0	0.555077	0.476996	0.517356	0.477131	0.48231	0.342792	0.250384	0.520639	0.423888	HSC_only
Srm	0.79238	0.720019	0.356624	1.23771	0.640521	0.346296	0.54511	0.394474	0.750641	0.290914	0.212218	0.324476	0.628606	0.133916	0.325641	0	0.567025	0.244816	0.756188	0.291273	0.293882	0.354456	0.24082	0.543473	0.229486	HSC_only
Ssr4	1.22874	1.53131	1.3409	1.44906	1.21694	1.18552	1.45419	1.09825	1.36703	1.17338	1.04934	1.16884	1.25331	0.924357	1.17257	0.953743	1.37117	1.18414	1.37661	1.14834	1.08392	1.24918	1.06765	1.2168	1.02867	HSC_only
Sssca1	0.393079	0.434501	0.497002	0.601817	0.428264	0.339559	0.42533	0.233571	0.484323	0.331408	0.203056	0.238544	0.454598	0.104926	0.335163	0	0.317564	0.260122	0.484308	0.323285	0.312077	0	0.239203	0.410386	0.334388	HSC_only
Stat3	0.854905	0.691816	1.07444	0.79451	0.791105	0.450214	0.274636	0.707847	0.437773	0.423224	0.787217	0.657324	0.682141	0.399773	0.447874	1.43289	0.291984	0.675201	0.436832	0.413019	0.692611	0.687464	1.14355	0.626828	0.592432	HSC_only
Stat6	0.18269	0.161856	0.234907	0.174648	0.16561	0.182371	0.0939744	0.142445	0.145715	0.176328	0.267935	0.293774	0.388888	0.106618	0.175466	0	0.149283	0.162122	0.156623	0.18272	0.173272	0.208001	0.243268	0.167256	0.186097	HSC_only
Stmn1	1.24173	3.21589	0.902399	1.4191	1.20895	1.47699	3.35624	1.41088	1.7795	1.41612	1.36475	1.17934	1.48584	1.01156	1.47533	1.99899	3.32377	1.19341	1.69078	1.44662	1.30754	2.91635	1.19708	1.5408	1.36913	HSC_only
Stx12	0.209575	0.263814	0.236818	0.179507	0.208991	0.203386	0.313636	0.117668	0.19412	0.204704	0.453257	0.334806	0.326774	0.592058	0.219161	0	0.276904	0.149618	0.205923	0.196639	0.198938	0.752259	0.273802	0.272815	0.261937	HSC_only
Sucla2	0.267175	0.372654	0.409652	0.275628	0.261715	0.216097	0.31106	0.21166	0.247196	0.2076	0.243314	0.247131	0.418293	0.292279	0.233506	0	0.356145	0.277576	0.25496	0.211223	0.243615	0.208001	0.235876	0.326422	0.219719	HSC_only
Sumo3	0.59449	0.906551	0.563478	0.727691	0.58208	0.652209	1.07945	0.701066	0.846358	0.64309	0.762732	0.636402	0.708996	0.543925	0.624564	0.953743	1.12611	0.473809	0.794494	0.647969	0.60238	0.559788	0.483028	0.699679	0.642502	HSC_only
Sun2	0.252726	0.20874	0.160241	0.184059	0.230591	0.296627	0.30364	0.235661	0.222034	0.254346	0.463304	0.487893	0.521404	0.475823	0.30124	0	0.271085	0.391605	0.232901	0.236052	0.311586	0.687464	0.226591	0.291045	0.326731	HSC_only
Tax1bp1	1.40714	1.44738	1.32918	1.28457	1.30476	1.20547	1.31074	1.31579	1.09011	1.11162	1.47766	1.43078	1.39787	1.24145	1.26597	1.43289	1.28325	1.12141	1.12121	1.11146	1.39467	1.73364	1.58188	1.27389	1.17018	HSC_only
Tcf25	0.920645	0.953358	1.1955	0.960499	0.87662	0.834407	0.841684	0.897476	0.829769	0.79332	1.13803	1.02156	0.97515	0.990236	0.834141	0	0.900167	0.694562	0.790341	0.768198	0.949861	0.354456	0.958808	0.915255	0.885502	HSC_only
Tecpr1	0.251494	0.10766	0.159494	0.123544	0.228284	0.290143	0.123869	0.258984	0.169283	0.255257	0.560052	0.419897	0.30939	0.445579	0.301216	0	0.025555	0.192615	0.137769	0.286257	0.341925	0	0.12522	0.134108	0.360524	HSC_only
Tinagl1	0.259207	0.0840265	0.160422	0.14449	0.291656	0.350212	0.154198	0.300287	0.252314	0.407975	0.685001	0.734481	0.411618	0.904372	0.346374	0	0.258474	0.345193	0.244664	0.401853	0.309347	0	0.172577	0.248192	0.283683	HSC_only
Tm9sf3	0.791178	0.940709	0.767309	0.876407	0.738487	0.639536	0.638914	0.707519	0.698542	0.60786	0.924683	0.892163	0.963373	0.894074	0.665009	1.43289	0.760148	0.665877	0.709742	0.609727	0.857043	0.898713	0.714402	0.822241	0.70969	HSC_only
Tmed3	0.659251	0.697965	0.760903	0.757315	0.645444	0.610911	0.724154	0.425345	0.682582	0.631589	0.436427	0.588283	0.518695	0.29937	0.593886	0.953743	0.71105	0.583035	0.686085	0.628909	0.396233	0.898713	0.407391	0.616392	0.693796	HSC_only
Tmem14c	0.499139	0.969521	0.530863	0.645318	0.464245	0.429272	0.94522	0.684346	0.626618	0.425916	0.402377	0.419345	0.499739	0.327845	0.42558	0	1.09184	0.397951	0.601376	0.435368	0.416263	1.10405	0.34207	0.525787	0.332917	HSC_only
Tmem205	0.35726	0.288805	0.15104	0.384626	0.383152	0.426395	0.505995	0.362302	0.490136	0.449675	0.333595	0.26119	0.398097	0.297265	0.431089	1.43289	0.374287	0.402089	0.480563	0.443982	0.34497	0.354456	0.320264	0.457738	0.428042	HSC_only
Tmem258	0.755145	0.748324	0.871013	0.862307	0.700146	0.603555	0.826158	0.5845	0.710003	0.629438	0.4341	0.505057	0.63253	0.416121	0.679981	0	0.856024	0.610191	0.796522	0.660463	0.825708	1.18186	0.691917	0.859094	0.811901	HSC_only
Tmsb4x	2.94253	3.14457	2.8827	2.81485	2.98028	3.1078	2.96518	2.97016	3.01463	3.1104	3.21624	3.3288	3.08482	3.39786	3.12338	3.44402	2.98554	3.01783	3.02469	3.10722	3.01364	3.00925	2.8204	2.98217	3.00039	HSC_only
Tnfaip8	1.10167	0.791907	0.894166	1.0478	1.08484	0.871183	0.787211	0.769191	0.827487	0.876172	1.14807	1.31539	1.22768	0.99287	0.909315	0	0.672064	0.872963	0.858913	0.879642	1.01891	0.752259	0.890658	0.919178	0.959139	HSC_only
Tnip3	0.439093	0.307373	0.648748	0.409553	0.577962	0.478317	0.349946	0.463935	0.454211	0.592593	0.326619	0.275847	0.273892	0.334991	0.48339	0	0.256105	0.590692	0.477572	0.616771	0.578409	0	1.49433	0.601718	0.565629	HSC_only
Tpi1	0.886238	1.45764	0.756745	1.16065	0.976528	0.986071	1.544	1.02221	1.30008	0.979326	0.846304	0.988484	1.13666	0.947036	0.951486	0.953743	1.48287	0.975846	1.24102	0.995656	0.931529	1.53065	0.757443	1.08595	0.855959	HSC_only
Tpm4	0.0691905	0.114576	0.0407954	0.0697764	0.0697498	0.0632816	0.119723	0.0422007	0.0504912	0.0598631	0.246794	0.308436	0.211214	0.313776	0.0675707	0	0.176057	0.0403956	0.0499726	0.0662702	0.061968	0.208001	0.0768244	0.0784408	0.0702888	HSC_only
Tra2a	1.29889	1.15865	1.37805	1.1085	1.17436	1.42227	1.11266	1.22399	1.18839	1.25549	1.11802	1.02404	1.02962	0.689805	1.43634	1.75548	1.16357	1.40542	1.21305	1.30709	1.4503	1.18186	1.52211	1.202	1.35576	HSC_only
Traip	0.240244	0.274869	0.0551655	0.257569	0.217839	0.241288	0.241663	0.126835	0.302633	0.254437	0.173667	0.0760944	0.157121	0.101736	0.239587	0	0.251268	0.257306	0.288154	0.266775	0.155053	0	0.0432299	0.257599	0.233188	HSC_only
Trmt112	1.2654	1.25945	1.01849	1.27692	1.24655	1.26702	1.41257	1.16862	1.32072	1.27983	1.09386	1.13759	1.23838	1.0374	1.26626	0	1.26566	1.32377	1.34991	1.28826	1.31679	1.36153	0.979737	1.30524	1.26211	HSC_only
Tsc22d2	0.611124	0.408105	0.256617	0.389239	0.289544	0.749172	0.462316	0.342341	0.473021	0.362604	0.503956	0.377634	0.431261	0.433165	0.760229	2.4988	0.568479	0.37429	0.482911	0.28797	0.826043	0.208001	0.388526	0.429595	0.319482	HSC_only
Tspan4	0.785652	0.642342	0.626143	0.868554	0.787935	0.763723	0.861648	0.651407	0.928033	0.831297	0.72197	0.692967	0.694628	0.536567	0.790935	0.953743	0.656326	0.710835	0.903271	0.831998	0.719865	0.208001	0.653418	0.88125	0.767722	HSC_only
Tubb2a	0.0482447	0.129251	0.0933692	0.0384458	0.0510039	0.0638702	0.0876644	0.0620191	0.0495542	0.0530656	0.150452	0.126022	0.0996868	0.233279	0.0641223	0	0.0860757	0.141511	0.0501554	0.0564426	0.06775	0.550793	0.0685039	0.0480754	0.0454257	HSC_only
Ubap2l	0.832312	0.868594	0.677975	0.882508	0.750329	0.674547	0.68855	0.648399	0.749258	0.602071	0.92168	0.83239	0.870555	0.726933	0.683882	1.75548	0.696515	0.688744	0.727043	0.637652	0.734542	1.15505	0.751197	0.787357	0.748219	HSC_only
Ube2b	0.82208	0.770927	0.864022	0.707295	0.829941	0.835307	0.766715	0.780922	0.715576	0.801342	1.06387	1.02107	0.87811	0.986399	0.853107	0.953743	0.907796	0.760078	0.745646	0.852091	0.920234	0.752259	0.917621	0.755896	0.799083	HSC_only
Ube2e3	0.758551	0.980147	0.762712	0.719648	0.726258	0.722429	0.955445	0.715557	0.680514	0.654265	0.835671	0.762697	0.811502	1.14315	0.754914	0.953743	1.0615	0.534267	0.679589	0.696733	0.775829	0.550793	0.847496	0.744733	0.710016	HSC_only
Uck2	0.254186	0.312681	0.247627	0.370959	0.19006	0.170536	0.273733	0.297036	0.245482	0.132952	0.386275	0.388939	0.505093	0.238968	0.175989	0	0.279206	0.130995	0.239601	0.128828	0.0905751	0.342792	0.112564	0.231122	0.14991	HSC_only
Usmg5	0.608129	0.743682	0.629869	0.638104	0.510115	0.486733	0.772205	0.534895	0.628424	0.458747	0.692745	0.722129	0.954716	0.483016	0.459836	0	0.536685	0.366059	0.543766	0.402962	0.776006	0.550793	0.683679	0.796879	0.669119	HSC_only
Vamp8	1.60795	1.73927	1.53212	1.68688	1.55487	1.51299	1.74611	1.62145	1.59516	1.47151	1.39022	1.31061	1.47673	0.86548	1.51498	0.953743	1.61377	1.29902	1.62181	1.52709	1.43488	1.55267	1.39338	1.50364	1.38392	HSC_only
Vmp1	0.767014	0.669087	0.965694	0.7746	0.669457	0.570185	0.492951	0.726721	0.608432	0.578305	0.858358	0.806404	0.797488	0.593617	0.510632	0	0.563452	0.675681	0.604906	0.577232	0.792458	0.208001	1.23027	0.978978	0.838588	HSC_only
Wbp1l	0.23606	0.158216	0.215588	0.229662	0.227248	0.249973	0.201691	0.212719	0.232439	0.264212	0.476473	0.501177	0.4969	0.494368	0.257679	0.953743	0.17626	0.252133	0.216719	0.237145	0.222303	0	0.166656	0.249128	0.30218	HSC_only
Wsb1	0.37683	0.465214	0.437713	0.279274	0.315212	0.412501	0.460223	0.319513	0.314723	0.320021	0.638125	0.51186	0.450539	0.577956	0.441131	0	0.436428	0.36225	0.34156	0.357691	0.47485	0.752259	0.728278	0.370191	0.373781	HSC_only
Wwc2	0.567832	0.525833	0.654456	0.420884	0.355671	0.730413	0.495675	0.493877	0.466043	0.378809	0.771506	0.605481	0.744004	0.777213	0.734108	1.43289	0.627752	0.360329	0.495926	0.358777	0.769048	0.90258	0.356389	0.389917	0.417756	HSC_only
Zfp512	0.230903	0.220613	0.459861	0.222536	0.270589	0.312552	0.266591	0.274413	0.267207	0.325712	0.532229	0.426127	0.296573	0.400325	0.296299	0	0.26658	0.233984	0.284353	0.316486	0.389473	0.752259	0.261646	0.338803	0.410816	HSC_only
Zfp64	0.228664	0.164823	0.256526	0.151992	0.133214	0.22654	0.228259	0.196296	0.168753	0.145272	0.399451	0.358673	0.319128	0.403081	0.223315	0	0.151643	0.0911691	0.169323	0.143759	0.278063	0	0.0848312	0.15357	0.101277	HSC_only
Zranb1	0.319195	0.430999	0.353691	0.306399	0.313218	0.307588	0.328835	0.214067	0.29038	0.292707	0.529561	0.437502	0.480341	0.351987	0.343555	0.953743	0.370211	0.222109	0.295071	0.314792	0.39324	0.895465	0.296591	0.341831	0.295987	HSC_only
mt-Nd4	3.31553	3.19723	3.29585	3.2888	3.34216	3.35537	3.15513	3.22862	3.32218	3.33169	3.50025	3.50601	3.49288	3.55029	3.33554	3.67096	3.22226	3.27756	3.3356	3.37204	3.53405	3.25393	3.37471	3.49117	3.49092	HSC_only
mt-Nd5	1.5116	1.30314	1.48047	1.46436	1.50845	1.55242	1.36647	1.61542	1.50319	1.53651	1.71707	1.75647	1.70106	1.81354	1.55478	1.99899	1.16289	1.38244	1.4808	1.54517	1.78215	1.43404	1.55844	1.64963	1.73559	HSC_only
1700017B05Rik	0.250217	0.181645	0.215796	0.20673	0.167939	0.232952	0.272482	0.170236	0.183016	0.139368	0.507694	0.483629	0.469738	0.451366	0.246675	0	0.144301	0.172234	0.191643	0.145858	0.165174	0	0.0368926	0.13209	0.154874	overlap
Abhd17b	0.296866	0.248346	0.310988	0.262654	0.252411	0.225624	0.182584	0.292175	0.222975	0.203613	0.565193	0.452997	0.600088	0.381612	0.211655	0	0.181561	0.134284	0.204004	0.186442	0.232069	0.208001	0.512916	0.278598	0.274661	overlap
Ablim1	0.175868	0.0662992	0.259808	0.129392	0.212917	0.162986	0.0374465	0.0513667	0.117769	0.178145	0.477809	0.594461	0.396176	0.346944	0.165665	0	0.058801	0.0717333	0.110695	0.163702	0.25208	0	0.116154	0.16448	0.230893	overlap
Aff4	0.463826	0.294208	0.371848	0.296323	0.320836	0.470564	0.270859	0.272536	0.295721	0.310465	0.740954	0.528323	0.455014	0.365778	0.478363	0	0.329113	0.31517	0.299766	0.318072	0.515391	0.544258	0.431862	0.404221	0.43454	overlap
Ago2	0.354003	0.367919	0.406336	0.334453	0.289295	0.333106	0.344941	0.273265	0.32901	0.289151	0.708729	0.648452	0.612662	0.347639	0.344258	0	0.398889	0.35381	0.33564	0.289703	0.335096	0.208001	0.300441	0.41486	0.300738	overlap
Akap13	1.20072	1.11771	1.2916	1.09958	1.0411	1.22007	1.00769	0.997912	1.12949	1.12478	1.59888	1.46108	1.49004	1.39014	1.26032	1.43289	1.06921	1.03287	1.14402	1.18861	1.50486	1.59769	0.997193	1.40222	1.44026	overlap
Ankrd11	1.16393	1.10269	1.22035	1.15993	1.01154	0.975389	1.09015	0.912127	0.954124	0.891544	1.29206	1.17354	1.17984	1.02605	0.979214	1.75548	1.009	0.855238	0.94743	0.878853	1.17507	0.550793	0.990228	1.04634	1.02659	overlap
Ankrd13a	0.839613	1.00564	0.70606	0.81865	0.781042	0.877615	0.87526	0.778162	0.872926	0.848883	1.02348	1.10393	1.15937	0.950504	0.915693	0.953743	1.00315	0.746372	0.927228	0.856019	1.06998	1.10405	0.713297	0.948223	0.951907	overlap
Anks1	0.179234	0.269195	0.192283	0.163561	0.161014	0.274727	0.18811	0.273619	0.245388	0.212413	1.01837	1.01685	1.00295	1.02128	0.239848	0.953743	0.25864	0.15154	0.267174	0.216838	0.265542	0.550793	0.150771	0.246175	0.214333	overlap
Arid5a	0.203109	0.137032	0.36364	0.116819	0.095331	0.180729	0.0816793	0.215303	0.0979108	0.0814551	0.427329	0.240922	0.320599	0.308394	0.160377	0	0.102074	0.237396	0.08865	0.0815214	0.480289	0	1.25492	0.285242	0.178287	overlap
Arpc3	1.58094	1.59663	1.63793	1.49668	1.40341	1.53222	1.52145	1.52387	1.47395	1.38381	1.86899	2.08143	1.93184	2.10898	1.58807	0.953743	1.60433	1.39665	1.53186	1.43929	1.46379	1.40947	1.27705	1.468	1.31306	overlap
Asph	0.214524	0.218877	0.325885	0.224252	0.2504	0.22976	0.168808	0.311162	0.218398	0.254553	0.487801	0.400913	0.368988	0.513116	0.235687	0	0.18986	0.284233	0.207905	0.261722	0.335022	0	0.275641	0.301144	0.385397	overlap
Atp5o-1	0.894664	1.32126	0.844895	1.08298	0.865514	0.740117	1.32007	0.836171	0.973295	0.737638	0.558987	0.681	0.853944	0.593743	0.840954	1.43289	1.31169	0.792201	1.04068	0.823039	0.732354	1.10405	0.714277	0.932493	0.696576	overlap
B3gnt5	0.0973	0.0842901	0.186835	0.0735359	0.0528224	0.0925881	0.0982409	0.0664644	0.0745849	0.0532831	0.408417	0.32126	0.500189	0.368522	0.0908997	0	0.0793102	0.143231	0.0592937	0.0547539	0.23625	0	0.155772	0.0954151	0.0975569	overlap
Bcl11a	1.17662	1.24408	1.25629	1.07245	1.145	1.06662	0.900589	1.02318	0.972034	1.06946	0.810809	0.757007	0.745704	0.996993	1.07086	1.75548	0.942628	1.15116	1.01056	1.0794	1.35504	1.44935	1.09611	1.18265	1.18264	overlap
Cables1	0.0424738	0.0472069	0	0.0254061	0.0218534	0.0670771	0.0487565	0	0.0579495	0.0621366	0.254274	0.360999	0.327582	0.209339	0.0616129	0	0.0232389	0.0522751	0.0553718	0.059357	0.0616663	0.342792	0.0290491	0.089562	0.080248	overlap
Car2	1.98788	2.26246	1.71721	2.13175	1.96612	2.11971	2.58644	2.04125	2.19664	2.14236	1.9874	1.8013	1.98956	1.37646	2.11506	1.75548	2.6196	2.00594	2.14798	2.14575	1.95225	2.6986	2.15614	2.05568	2.02759	overlap
Cbarp	0.0604922	0.0623061	0.0425184	0.0564018	0.0638601	0.0658329	0.0417789	0.0400981	0.0654164	0.0579201	0.214002	0.300984	0.222319	0.269149	0.0843575	0	0.0611563	0	0.0648774	0.0630836	0.0746876	0	0.0374393	0.0865461	0.0513923	overlap
Cbfa2t3	1.19369	0.849321	0.877288	1.0914	1.1714	1.03245	0.803054	0.790762	0.964528	0.997373	0.76944	0.53044	0.71598	0.549165	1.00043	0	0.790989	1.05965	0.91858	0.986751	1.03406	0.810381	0.242913	1.00418	1.1077	overlap
Ccnt1	0.688073	0.550287	0.283468	0.451874	0.384429	0.938043	0.607897	0.555529	0.554053	0.384006	0.655318	0.531177	0.628119	0.643863	0.918039	1.99899	0.661146	0.411362	0.533273	0.340071	0.798665	0	0.520046	0.440066	0.390207	overlap
Cdc42ep3	0.282433	0.437798	0.212672	0.287146	0.286186	0.387843	0.439096	0.346714	0.382897	0.400348	0.253252	0.101589	0.133189	0.210496	0.398148	0.953743	0.41914	0.39471	0.404826	0.421247	0.38059	0.550793	0.134321	0.367538	0.317499	overlap
Cdk17	0.414731	0.280697	0.285147	0.349609	0.323406	0.366198	0.373123	0.303565	0.349878	0.310903	0.767179	0.74408	0.797895	0.632881	0.399648	0	0.382134	0.182983	0.348062	0.322729	0.500549	0	0.323335	0.485443	0.349177	overlap
Cdkn1a	0.309815	0.148842	0.0876566	0.139386	0.0759821	0.420425	0.301908	0.19102	0.161038	0.0752911	0.797143	0.676756	0.483393	1.01525	0.406128	0	0.352234	0.224757	0.159084	0.0474915	0.327858	0	0.860277	0.124286	0.0853812	overlap
Cdkn2d	0.376254	0.676999	0.514923	0.286141	0.352372	0.452982	0.66648	0.476455	0.358912	0.354631	0.669672	0.59853	0.626927	0.843468	0.488303	0	0.608135	0.384568	0.383294	0.364819	0.413918	0.697248	0.412407	0.410144	0.391271	overlap
Cebpb	1.17317	0.71355	1.14598	0.83151	0.795096	1.12991	0.707277	0.983226	0.723924	0.694372	2.76741	2.5741	2.56416	2.46203	1.23487	1.43289	0.806346	0.856114	0.71904	0.638121	1.07328	0.752259	1.12316	0.745397	0.801387	overlap
Cenpb	0.592959	0.774845	0.64835	0.638973	0.57607	0.541884	0.688911	0.581399	0.609528	0.527004	0.759877	0.791751	0.771843	0.753321	0.551382	1.43289	0.679265	0.522239	0.600168	0.53365	0.654492	0.90258	0.44866	0.672919	0.638326	overlap
Cers2	0.698803	0.642538	0.681668	0.785131	0.65875	0.607856	0.790796	0.64859	0.70873	0.591591	0.817067	1.07362	0.982423	0.891593	0.596475	0	0.681373	0.544901	0.684446	0.606419	0.578898	0.354456	0.582346	0.659618	0.596687	overlap
Cirbp	0.929752	0.718256	0.898398	0.758688	1.02199	1.16317	0.889486	0.872686	0.968623	1.12752	1.62357	1.67721	1.44141	1.7885	1.22749	2.19467	0.94567	1.01244	1.02919	1.2118	1.22741	0.810381	0.926626	1.01613	1.31034	overlap
Cish	0.26729	0.192493	0.20349	0.181762	0.213439	0.354671	0.256208	0.400551	0.310235	0.298063	0.732199	0.715948	0.74037	0.844834	0.333562	0	0.290776	0.449504	0.280269	0.282648	0.775156	0.544258	1.59838	0.522185	0.499962	overlap
Cited2	0.779754	0.892256	1.22769	0.690212	0.932957	0.93024	0.786841	1.27651	0.859399	1.11089	0.53415	0.358525	0.369717	0.299595	0.894723	1.43289	0.897701	1.37142	0.879949	1.10284	1.77584	1.35247	3.31427	1.54732	1.61455	overlap
Clec2d	0.43156	0.41225	0.942366	0.553851	0.689172	0.592131	0.535059	1.11399	0.827253	0.963021	0.372221	0.235292	0.268397	0.338933	0.513572	1.75548	0.397018	1.12862	0.758473	0.947879	0.922854	1.04192	1.55312	1.11406	1.21917	overlap
Clk1	1.21818	0.760366	1.14109	0.827193	0.881993	1.30207	0.82269	1.09689	0.943142	1.0285	1.26623	1.17134	1.08178	1.23538	1.31016	1.99899	0.903473	0.987664	0.955751	0.99431	1.53986	1.09756	1.07531	1.00218	1.16747	overlap
Cmip	0.20715	0.20445	0.177885	0.188142	0.215197	0.211049	0.182889	0.171225	0.173586	0.168802	0.440358	0.405442	0.367244	0.255727	0.211943	0	0.190599	0.131556	0.196182	0.198937	0.329802	0.342792	0.245853	0.215088	0.294692	overlap
Cmtm7	1.23088	1.71843	1.34459	1.33973	0.982076	1.37807	1.68513	1.09314	1.46061	1.19531	1.2277	1.04039	1.4727	0.78469	1.45202	1.75548	1.7627	1.18008	1.57871	1.32555	1.438	1.67386	0.866353	1.39654	1.16911	overlap
Cnbp	1.94515	2.04575	1.65519	2.20489	1.90674	1.76328	1.97899	1.8155	1.98531	1.71113	2.05639	2.14107	2.24516	2.06969	1.77922	2.92044	1.84225	1.72419	1.99496	1.76596	1.74888	1.25174	1.72423	1.89021	1.69903	overlap
Cnpy2	0.76036	0.90026	0.728864	0.86734	0.764993	0.754455	0.962938	0.820387	0.861129	0.754827	0.481527	0.589855	0.629651	0.525788	0.776255	0	0.952564	0.784222	0.862182	0.81001	0.745346	0.208001	0.588692	0.734875	0.698579	overlap
Commd3	0.486595	0.661868	0.450327	0.532652	0.472342	0.467473	0.806196	0.388995	0.579116	0.48574	0.403135	0.321301	0.492188	0.226625	0.468307	0	0.67937	0.57904	0.541908	0.514437	0.441232	0.550793	0.448419	0.522525	0.48779	overlap
Crem	0.035025	0.0666735	0	0.0251848	0.0326709	0.0364346	0.0351179	0.0198422	0.0247757	0.0292217	0.363416	0.373133	0.317774	0.222502	0.0354813	0	0.0142232	0.0570676	0.033495	0.0346573	0.0369701	0	0.195541	0.0314922	0.0427483	overlap
Csnk1a1	1.12866	1.1439	0.84841	1.08104	1.04295	1.03808	1.02608	1.06233	1.00386	0.942864	1.28165	1.18444	1.23425	0.917777	1.08853	1.99899	1.15206	1.07673	1.03734	0.977124	1.15617	0.980396	1.02401	1.1431	0.987843	overlap
Ctla2a	1.95239	1.5026	1.75124	1.86484	1.3484	2.01412	1.70284	1.60911	1.89101	1.41043	3.09091	3.08716	3.4649	2.46267	1.92643	0	1.66175	1.13947	1.86885	1.33672	1.79208	1.79679	1.33409	1.7415	1.36929	overlap
Ctla2b	0.128735	0.0488624	0.123195	0.0773512	0.0799022	0.139952	0.0834819	0.102264	0.0902066	0.0792068	0.386226	0.36228	0.440175	0.24207	0.116602	0	0.0940493	0.0650226	0.0932364	0.072891	0.23765	0.208001	0.129452	0.159589	0.13386	overlap
Cytip	0.355872	0.341716	0.261155	0.302444	0.326067	0.301243	0.218501	0.246006	0.281497	0.283722	0.998886	0.805317	0.994272	0.795607	0.316445	0	0.251165	0.249326	0.280552	0.300751	0.556279	0.354456	0.716078	0.459238	0.335478	overlap
D8Ertd738e	1.18446	1.18353	1.12709	1.01551	0.965289	1.25617	1.14593	1.06438	0.980861	0.935185	1.23052	1.346	1.2007	0.946605	1.28757	1.75548	1.12179	1.10139	1.00915	0.922853	1.04447	0.467589	0.657271	0.848921	0.848454	overlap
Dapp1	0.813802	0.929259	0.765823	0.974395	0.90814	0.965891	0.945942	0.900649	1.04689	1.03251	0.767233	0.525828	0.813752	0.604634	0.917055	0	0.811036	0.987299	1.01297	1.04638	1.05941	1.39239	1.12868	1.10308	1.09623	overlap
Dazap2	0.845055	0.795967	0.859891	0.710794	0.758621	0.842466	0.718113	0.763432	0.736917	0.745933	1.18044	1.07259	1.00416	1.20045	0.887114	0.953743	0.785124	0.705365	0.758285	0.743346	0.983585	0.752259	0.723371	0.794849	0.806412	overlap
Ddit4	0.203878	0.195027	0.160632	0.168533	0.121616	0.227568	0.193974	0.128859	0.144064	0.138298	0.730288	0.656066	0.66324	0.682565	0.235033	0	0.193916	0.0833354	0.143377	0.120491	0.202298	0	0.0854983	0.174895	0.137743	overlap
Dennd4a	0.56018	0.239893	0.429123	0.340195	0.329516	0.714249	0.35632	0.456694	0.40286	0.380813	1.48192	1.27075	1.25066	1.30573	0.821972	0.953743	0.494436	0.447207	0.471989	0.411415	0.864573	0.889561	1.31656	0.490203	0.479605	overlap
Dguok	0.699958	0.681031	0.825202	0.676761	0.768355	0.755314	0.663226	0.771873	0.777206	0.811465	0.600597	0.636667	0.638497	0.63783	0.778107	0	0.709254	0.642853	0.798466	0.83665	0.743275	0.354456	0.643139	0.776094	0.791921	overlap
Dnajb6	0.720753	0.76466	0.736549	0.71341	0.691507	0.737005	0.798117	0.545495	0.65485	0.633785	0.904537	0.933292	0.916245	0.727977	0.738256	0	0.790788	0.60938	0.685683	0.652776	0.805447	1.32091	1.10194	0.773574	0.772004	overlap
Dusp2	1.10478	0.470585	0.99128	0.740354	0.712915	1.28485	0.531882	0.651402	0.879669	0.897123	1.81026	1.93384	1.59146	1.87615	1.28052	2.35825	0.572536	0.762904	0.847036	0.780421	1.07453	0.208001	0.973748	0.746142	0.711859	overlap
Dynll1	0.819573	1.72104	0.789967	1.12609	0.791724	0.648234	1.42002	0.585736	0.859376	0.592439	0.555628	0.390898	0.652015	0.30734	0.658699	1.43289	1.42884	0.661509	0.863142	0.620858	0.574757	1.04192	0.607807	0.722961	0.514387	overlap
Dyrk3	0.255328	0.177555	0.376882	0.16966	0.137033	0.271293	0.272478	0.348326	0.172838	0.114983	0.760391	0.661362	0.722569	0.584375	0.315808	0	0.276484	0.43002	0.208077	0.125649	0.446308	0	0.906086	0.269268	0.195464	overlap
Eif1	3.12111	2.95794	3.03553	3.05281	2.97231	3.00244	2.85062	2.80436	2.81719	2.80624	3.15086	3.1843	3.04269	3.23693	3.01011	2.83051	2.86936	2.71759	2.79607	2.78113	2.88687	2.67518	3.00556	2.75462	2.7508	overlap
Eif4g2	1.11832	1.12538	0.882678	1.14855	1.03532	1.02547	0.998561	1.08353	1.04883	0.927258	1.31956	1.16519	1.35959	0.925412	0.998521	0	1.03014	0.934729	0.975453	0.85737	1.03641	1.50358	1.1688	1.16155	1.09177	overlap
Elof1	0.399569	0.831122	0.548815	0.496629	0.440502	0.378807	0.906057	0.366218	0.475543	0.388517	0.192176	0.251798	0.318842	0.182622	0.374134	0	0.81445	0.393322	0.477143	0.379831	0.434076	0.354456	0.225839	0.4207	0.35808	overlap
Emb	0.373379	0.337154	0.200181	0.331994	0.389978	0.43433	0.382596	0.292233	0.384529	0.400427	0.65683	0.690327	0.712044	0.77163	0.407081	0	0.293287	0.345801	0.3635	0.393261	0.537332	0	0.320923	0.446104	0.471085	overlap
Emd	0.562865	0.629307	0.373679	0.541613	0.508991	0.530401	0.73483	0.495957	0.544901	0.507437	0.732477	0.742724	0.74028	0.608395	0.534033	0.953743	0.727588	0.449571	0.525741	0.499919	0.535983	0.342792	0.450877	0.513389	0.511503	overlap
Epb41	0.454346	0.377959	0.331241	0.430568	0.460514	0.37513	0.328345	0.396097	0.37499	0.356696	0.754678	0.697251	0.581981	0.535173	0.369255	0	0.313651	0.441764	0.367772	0.363525	0.487284	0.752259	0.440219	0.409024	0.43215	overlap
Etfb	0.691374	1.16631	0.507837	0.872768	0.644989	0.646552	1.15047	0.577963	0.834932	0.610116	0.449155	0.58776	0.683521	0.383805	0.748067	0	1.08055	0.602614	0.935045	0.699811	0.70838	1.04772	0.638191	0.886782	0.63666	overlap
Fabp5	0.440597	0.908539	0.17122	0.537041	0.36394	0.390677	0.902101	0.225826	0.499844	0.289867	0.523685	0.530864	0.531193	0.530585	0.365705	0	0.644846	0.235812	0.467079	0.284118	0.334831	0.90258	0.313895	0.323725	0.284808	overlap
Fam107b	0.642009	0.569466	0.627048	0.635607	0.629912	0.855199	0.737615	0.458442	0.779426	0.773631	1.27549	1.0759	1.06431	0.802121	0.906231	0.953743	0.795026	0.738853	0.820204	0.841134	1.02627	1.01185	0.613131	0.792379	0.763495	overlap
Fam162a	0.481353	0.663149	0.279735	0.631416	0.432362	0.434766	0.794264	0.431953	0.629139	0.416889	0.285138	0.305857	0.551716	0.38351	0.440091	0.953743	0.682527	0.397076	0.630479	0.43803	0.48913	0.467589	0.456064	0.560094	0.352827	overlap
Fam212a	0.549495	0.589018	0.570148	0.704273	0.678402	0.487302	0.607044	0.50799	0.612875	0.621542	0.181329	0.284416	0.408455	0.371553	0.478378	0	0.633584	0.509707	0.603475	0.615486	0.43236	0	0.0930108	0.478239	0.500358	overlap
Fam96a	0.683051	1.01955	0.705639	0.741676	0.662484	0.567082	0.835531	0.683617	0.66658	0.583775	0.402383	0.42171	0.52808	0.417883	0.705262	0	1.07272	0.500588	0.794284	0.678607	0.544058	0.697248	0.502109	0.695677	0.519172	overlap
Fbxo9	0.608149	0.367234	0.539062	0.488543	0.509121	0.644181	0.580712	0.540492	0.641889	0.596222	1.06351	1.16799	1.20285	0.904877	0.662983	0.953743	0.501919	0.593169	0.62946	0.627645	0.796993	1.35844	0.715931	0.807819	0.676799	overlap
Fchsd2	0.564052	0.483221	0.553339	0.550459	0.468884	0.566228	0.442564	0.519103	0.508748	0.477253	0.390385	0.315135	0.304307	0.321947	0.558807	0	0.519962	0.58272	0.544846	0.503442	0.750805	0.354456	0.509188	0.564218	0.544744	overlap
Fgfr1	0.0782206	0.0393939	0.104217	0.0587156	0.0690735	0.123312	0.0846553	0.194782	0.0802133	0.082991	0.292364	0.307758	0.29689	0.233674	0.123631	0	0.0791156	0.0789576	0.0904857	0.0751399	0.123165	0	0.139409	0.103099	0.118381	overlap
Fkbp5	0.162341	0.239297	0.122759	0.189595	0.117531	0.111363	0.214107	0.131695	0.170701	0.102681	0.312939	0.342017	0.337719	0.259788	0.0909228	0	0.205937	0.0326144	0.138243	0.0954902	0.135914	0.208001	0.14198	0.19782	0.183328	overlap
Fos	2.53421	1.1226	2.11074	1.58779	1.48043	2.73514	1.53829	2.29869	1.91934	1.83061	1.96531	1.17407	1.52377	0.947462	3.02918	2.4988	2.08619	2.24528	2.00253	1.80801	3.21205	2.28893	2.13955	2.31893	2.35205	overlap
Fosb	1.00498	0.682231	1.07689	0.883128	0.713943	1.30899	0.989307	1.21404	1.1352	1.03848	0.498404	0.257914	0.44605	0.436392	1.76298	0.953743	1.38028	1.41439	1.4919	1.39105	1.64646	0.908949	1.52061	1.48439	1.32058	overlap
Fosl2	0.333565	0.1295	0.352735	0.167289	0.136014	0.398888	0.134958	0.279038	0.180822	0.185303	1.38305	1.08166	1.00993	0.869919	0.351455	0.953743	0.146415	0.24682	0.175627	0.148582	0.464362	0.697248	0.677738	0.239059	0.228747	overlap
Foxn3	0.66713	0.542875	0.672575	0.551394	0.627683	0.811944	0.701683	0.625004	0.686538	0.732784	1.04664	0.82745	0.878085	0.790291	0.795858	0.953743	0.658647	0.667672	0.727955	0.733689	0.943189	0.810381	0.741548	0.836404	0.880104	overlap
Foxo1	0.119844	0.0458154	0.039818	0.0768394	0.153326	0.119276	0.113409	0.0724952	0.0858724	0.130224	0.445559	0.526548	0.319613	0.30767	0.133545	0	0.112243	0.121381	0.0926207	0.122337	0.106497	0.342792	0.133503	0.107382	0.144324	overlap
Fut8	1.30061	0.948738	1.36681	1.40227	1.22553	0.76272	0.593415	0.854017	0.885852	0.758417	0.593556	0.632841	0.754738	0.764608	0.827166	1.43289	0.506602	0.976729	0.926438	0.831477	1.04001	0.697248	1.25195	1.06059	0.860849	overlap
Galc	0.10428	0.0435424	0.116124	0.0794994	0.103236	0.13977	0.120562	0.0339211	0.106614	0.13683	0.598464	0.510859	0.533102	0.428676	0.128367	0	0.112111	0.124892	0.101425	0.13573	0.181731	0.342792	0.0946289	0.14077	0.172682	overlap
Gcnt2	0.977522	0.527187	0.972675	0.875882	0.942062	0.881803	0.638244	0.939167	0.802985	0.89375	0.764985	0.59394	0.730988	0.535567	0.863743	0	0.58395	0.735263	0.79218	0.914764	0.992138	0.354456	0.441991	0.924725	0.976346	overlap
Gfi1b	0.282307	0.255155	0.0856426	0.290072	0.260604	0.218917	0.329434	0.0700062	0.278921	0.228148	0.0761244	0.0226514	0.0247341	0.0484769	0.229649	0	0.28288	0.246651	0.275517	0.238542	0.328979	0.208001	0.0355088	0.241629	0.180998	overlap
Gimap1	0.976775	0.755656	0.721917	0.877777	1.05779	1.21114	0.99731	1.23155	1.14278	1.36592	0.80527	0.675912	0.871441	0.985471	1.16973	1.75548	0.954517	1.18206	1.11944	1.33529	1.20365	0.898713	0.761114	1.11476	1.32183	overlap
Gimap6	0.976804	0.608044	0.882174	0.687684	1.10883	1.37876	0.833444	1.44956	1.16161	1.48993	1.11609	0.844766	0.84806	0.777958	1.39341	0	0.804936	1.30971	1.13233	1.47343	1.23676	1.09756	0.708089	1.08902	1.42904	overlap
Glul	1.13257	0.609285	0.924757	0.977909	1.16379	0.998196	0.602195	0.819222	0.763189	1.02054	1.35904	1.32438	1.09144	1.37809	1.06243	0	0.579556	0.86062	0.819139	1.05659	1.36784	1.45171	1.39592	1.00947	1.39187	overlap
Gm16286	0.893849	0.905828	0.524397	1.06594	0.847775	0.79154	0.944566	0.609441	0.918743	0.742596	0.603878	0.834472	0.880296	0.500824	0.818175	0.953743	0.846627	0.865196	0.958138	0.738101	0.877493	1.24918	0.695491	0.905237	0.710168	overlap
Gm19590	0.505075	0.275214	0.312922	0.448742	0.526212	0.785182	0.429513	0.410748	0.706312	0.758166	0.6514	0.390477	0.528092	0.287964	0.807315	0	0.531427	0.530095	0.737358	0.831283	0.806207	1.00666	0.259514	0.704883	0.686959	overlap
Gpr132	0.145713	0.0720481	0.0533529	0.156837	0.147909	0.170709	0.0916288	0.150399	0.144119	0.174621	0.519583	0.50751	0.507183	0.562345	0.155725	0	0.0805041	0.173459	0.145231	0.155389	0.148706	0	0.158583	0.163894	0.124361	overlap
Gpr146	0.15669	0.0444435	0	0.0773382	0.0969839	0.150636	0.0837264	0.0721557	0.11161	0.110148	0.419666	0.342154	0.340134	0.390514	0.153525	0	0.0862904	0.173776	0.11979	0.114513	0.145985	0.342792	0.459045	0.163643	0.128675	overlap
Gpr65	0.0442731	0.0107354	0.0520371	0.0674576	0.0482924	0.0612396	0.0392001	0.0557728	0.0659431	0.0600194	0.568215	0.352007	0.505824	0.339458	0.0570719	0	0.0663625	0.032722	0.0499544	0.0452675	0.222095	0	0.190557	0.153556	0.109179	overlap
Gpx1	1.67379	2.07677	1.59342	1.77733	1.58996	1.75161	1.98717	1.64136	1.85348	1.63318	1.57098	1.48249	1.74502	1.22467	1.83924	0.953743	1.92221	1.47183	1.93608	1.70576	1.63085	2.43261	1.33651	1.80413	1.46693	overlap
Gramd1a	0.344001	0.195989	0.309709	0.273609	0.251848	0.309766	0.283318	0.191517	0.245672	0.262084	0.603275	0.442706	0.595256	0.511727	0.310086	0	0.318799	0.144364	0.252824	0.24202	0.287229	0.342792	0.338255	0.27371	0.239799	overlap
H2-Q4	0.67227	0.684909	1.03845	0.59892	0.746071	0.727882	0.686337	1.04533	0.583346	0.724111	1.03529	0.817339	0.806025	0.980318	0.727004	0	0.74518	0.90612	0.613914	0.726579	0.982172	1.52624	1.50389	0.885564	0.90549	overlap
H2afz	1.74022	3.41929	1.59821	2.01526	1.67332	1.57155	3.33864	1.67978	1.90605	1.56879	1.41662	1.53843	1.86447	1.27378	1.6019	1.75548	3.2911	1.41929	1.89066	1.58787	1.44037	2.5724	1.50073	1.66007	1.45659	overlap
H3f3b	3.74599	3.33283	3.51465	3.30375	3.30002	3.88459	3.45482	3.5993	3.34796	3.43778	3.50595	3.34352	3.43784	3.35442	3.80802	2.83051	3.54205	3.4877	3.31932	3.35523	3.79891	2.88367	3.32597	3.37442	3.38612	overlap
Heatr5a	0.360326	0.314526	0.208798	0.330267	0.315247	0.308415	0.340546	0.35269	0.333409	0.304261	0.537094	0.480489	0.436817	0.333633	0.329799	0	0.297059	0.350343	0.349715	0.328371	0.470612	0.208001	0.380367	0.405948	0.381217	overlap
Hhex	0.655819	0.445773	0.446649	0.56059	0.684502	0.69913	0.662542	0.569251	0.607983	0.689014	0.404476	0.261818	0.252458	0.395702	0.633681	0.953743	0.570198	0.631915	0.561585	0.697319	0.556284	0.697248	0.188477	0.547067	0.595808	overlap
Hk2	0.339886	0.213015	0.326862	0.308672	0.236713	0.117613	0.114586	0.157817	0.143317	0.0949539	0.48087	0.735785	0.715794	0.333876	0.117137	0	0.0688058	0.126382	0.130437	0.0848475	0.354122	0	0.836987	0.311403	0.16067	overlap
Hlf	1.7378	0.919767	1.53482	1.47529	1.82558	1.72748	1.0212	1.45503	1.3663	1.74313	1.40356	1.08043	0.938671	1.38259	1.71417	1.75548	1.09692	1.51664	1.38143	1.80014	1.73755	1.24402	0.679833	1.4621	1.80656	overlap
Hmgb2	0.741438	3.14448	0.860395	0.76197	0.626543	1.0605	3.12295	0.711912	1.07451	0.94439	1.48325	1.3001	1.45073	1.14663	1.04128	0.953743	3.10666	0.692162	1.01652	0.929328	1.05427	3.19989	0.741663	0.94624	0.927339	overlap
Hmox2	0.538878	0.657133	0.683741	0.572017	0.521547	0.585408	0.661141	0.800806	0.60667	0.590054	0.467746	0.439919	0.490797	0.386569	0.625102	0.953743	0.65819	0.821445	0.640683	0.61624	0.649013	0.550793	0.759451	0.637957	0.572271	overlap
Hnrnpd	1.01973	1.44825	1.16061	1.2754	0.909976	0.838996	1.35837	1.01397	1.07296	0.728598	1.10133	1.0906	1.27248	0.935862	0.802436	0.953743	1.3935	0.896733	1.02186	0.727965	0.80787	0.637604	0.975877	1.09569	0.806828	overlap
Hnrnpdl	0.816384	0.990254	0.86931	0.954712	0.708803	0.656864	1.03142	0.849582	0.74007	0.560826	0.940931	1.12341	1.10001	0.889461	0.609371	0	0.974545	0.669168	0.727711	0.554381	0.621752	0.898713	0.7277	0.752183	0.645032	overlap
Hoxa5	0.248243	0.155351	0.164174	0.197047	0.254475	0.294641	0.164972	0.292719	0.225651	0.235954	0.43589	0.505547	0.238346	0.403536	0.282494	0	0.137518	0.221552	0.208935	0.219814	0.301464	0	0.178196	0.219797	0.316447	overlap
Hspa4	0.806952	0.928611	0.886472	0.989008	0.642758	0.586172	0.808347	0.602394	0.694344	0.447821	1.05109	1.19483	1.12364	0.916594	0.603309	0	0.750658	0.411873	0.711001	0.453174	0.578352	0.898713	0.589939	0.674682	0.533375	overlap
Hspa8	2.85166	3.04544	2.97997	3.10895	2.71096	2.64802	3.18732	2.88286	2.90048	2.59032	2.41138	2.57295	2.6814	2.28184	2.7191	3.21612	3.16692	2.68668	2.95003	2.62769	2.41841	3.01197	2.69614	2.68658	2.45058	overlap
Hypk	0.307307	0.396169	0.271604	0.407437	0.292599	0.271395	0.379939	0.238761	0.328792	0.263858	0.39602	0.438335	0.540934	0.524334	0.306127	0	0.34753	0.203569	0.355445	0.274087	0.366793	0.342792	0.374495	0.469109	0.314683	overlap
Ick	0.17049	0.144037	0.240303	0.128976	0.135125	0.167428	0.159321	0.178206	0.146715	0.124092	0.27115	0.289569	0.416489	0.224169	0.160555	0	0.12506	0.11617	0.144193	0.139561	0.190841	0.697248	0.123845	0.213249	0.170347	overlap
Ier3	0.893059	0.401935	0.513709	0.380092	0.338221	1.103	0.599321	0.724251	0.51895	0.467245	0.564021	0.37404	0.490381	0.220444	1.04407	0	0.685346	0.517937	0.549205	0.378374	1.02355	1.62175	0.967125	0.586877	0.439636	overlap
Ifi47	0.429962	0.582263	1.80987	0.506227	0.528427	0.49435	0.51615	1.77222	0.536951	0.552462	0.226309	0.229478	0.275204	0.494252	0.502648	0	0.743077	1.49702	0.548493	0.56278	1.13042	0.752259	2.34963	0.954179	1.01088	overlap
Ifitm1	3.43585	2.36439	3.47713	3.30567	3.52382	3.11896	2.1304	3.40066	3.0216	3.29598	2.90781	3.11747	2.92793	3.12981	3.10464	2.73168	1.99899	3.29077	2.97542	3.24956	3.14806	2.12028	3.46946	3.01777	3.23877	overlap
Ifngr1	0.466991	0.375507	0.470097	0.416393	0.501093	0.522892	0.4289	0.439641	0.434938	0.528582	1.41847	1.58171	1.55382	1.29529	0.527913	0	0.510315	0.542535	0.4477	0.516163	0.559505	0.810381	0.550183	0.479846	0.601952	overlap
Il16	0.268304	0.270736	0.120495	0.253051	0.300709	0.363851	0.337785	0.371075	0.335314	0.417026	0.177773	0.145262	0.112826	0.137034	0.385955	0	0.26004	0.324537	0.338072	0.417946	0.395714	0	0.0682517	0.333402	0.36035	overlap
Il2rg	0.504434	0.309314	0.8203	0.377132	0.488194	0.400062	0.15755	0.7362	0.331868	0.395333	0.535602	0.533038	0.511009	0.616741	0.366755	0.953743	0.241305	0.766148	0.339908	0.382493	0.592789	0.354456	1.30806	0.451296	0.547923	overlap
Il4ra	0.140339	0.0757095	0.125732	0.130776	0.15246	0.112609	0.0817191	0.0927191	0.130335	0.12895	0.402872	0.390569	0.316896	0.305193	0.118105	0.953743	0.0621218	0.0843102	0.115242	0.12031	0.145733	0.342792	0.26421	0.149856	0.161655	overlap
Irf2	0.880586	0.608733	1.14917	0.84761	0.881804	0.935639	0.756033	1.05485	0.858647	0.951762	0.846593	0.567836	0.690609	0.650096	0.994838	0	0.709431	0.962973	0.883314	1.00816	1.09905	0.467589	1.04335	0.917972	1.0389	overlap
Isy1	0.267137	0.357787	0.21848	0.319043	0.224583	0.227098	0.420841	0.283174	0.293517	0.217439	0.555469	0.47234	0.548355	0.349213	0.232375	0	0.382988	0.115902	0.309449	0.237079	0.25402	0.810381	0.226954	0.264547	0.233722	overlap
Jdp2	0.0681126	0.0603031	0	0.110481	0.0741023	0.0427756	0.0479253	0.0723834	0.0468465	0.0362238	0.212945	0.274744	0.231541	0.0717938	0.0461677	0	0.0574044	0.0284056	0.0680506	0.0467033	0.0778396	0	0.0230367	0.0501312	0.0824878	overlap
Jun	2.42475	1.84428	2.3021	1.92526	1.90738	2.68448	2.14021	2.53338	2.19674	2.29729	1.59853	0.964785	1.31556	1.13228	2.9082	2.4988	2.48971	2.70445	2.47925	2.55504	3.03013	2.95466	3.42121	2.75219	2.74207	overlap
Jund	2.93749	1.9156	2.6809	2.53277	2.5944	2.81328	1.88769	2.62241	2.45461	2.62367	2.50021	2.20736	2.26374	2.65603	3.05592	3.00295	2.30483	2.86688	2.60932	2.71594	3.17412	2.83521	3.10045	2.8488	3.02488	overlap
Kcnq1ot1	1.84362	1.69941	1.54462	2.06071	1.77002	1.77299	1.63926	1.7627	1.94422	1.76975	1.75627	1.79381	1.77931	1.79288	1.72658	1.43289	1.7083	1.58202	1.92773	1.76534	1.7911	0.354456	1.18031	1.927	1.788	overlap
Kdm6b	0.300432	0.21982	0.41876	0.214406	0.178438	0.317323	0.0953236	0.23473	0.216183	0.210412	0.52623	0.477818	0.469249	0.546987	0.339863	0.953743	0.180696	0.362468	0.235357	0.21696	0.38995	0.697248	0.705948	0.318604	0.297364	overlap
Klf10	0.256151	0.390681	0.355043	0.252258	0.284322	0.373718	0.323118	0.2655	0.328104	0.288544	0.530837	0.584785	0.444085	0.582872	0.375588	0	0.361769	0.331438	0.303122	0.31342	0.472317	0.354456	0.221655	0.356228	0.394309	overlap
Klf13	0.470651	0.305988	0.486051	0.341861	0.321236	0.564726	0.350702	0.321771	0.3828	0.310195	1.15811	1.19406	1.00709	1.31288	0.607475	0	0.471887	0.447301	0.407857	0.321771	0.600997	0.467589	0.2866	0.377814	0.400088	overlap
Klf2	1.32912	0.52613	1.09239	0.54951	0.677142	1.9556	0.886983	1.22302	0.863691	0.91159	2.41859	1.8717	1.47308	2.74756	2.3092	3.58626	1.09906	1.58419	1.10697	0.966478	1.91917	0	0.5752	0.823433	1.02103	overlap
Klf6	1.14774	0.544677	1.23238	0.656854	0.744209	1.44353	0.585288	1.34147	0.867324	1.00343	1.50721	1.0934	1.2263	1.51643	1.67346	0.953743	0.91453	1.4356	1.02482	1.0405	2.06329	0.544258	2.44474	1.46317	1.48559	overlap
Klf9	0.774369	0.25547	0.562939	0.482638	0.417945	0.991896	0.37182	0.538118	0.581875	0.527973	1.29416	1.28938	1.19578	1.34782	0.992856	0.953743	0.483129	0.505899	0.573405	0.454305	1.05106	0.697248	1.02921	0.620809	0.572792	overlap
Krcc1	0.422413	0.503216	0.384198	0.428646	0.42728	0.45714	0.542322	0.534108	0.496215	0.469607	0.409413	0.276326	0.43322	0.389057	0.449038	1.43289	0.561196	0.515154	0.49885	0.482342	0.517026	0.898713	0.513715	0.528098	0.485555	overlap
Lamtor4	0.560422	0.584106	0.55413	0.621138	0.537496	0.601636	0.594804	0.588483	0.656378	0.605508	0.453747	0.442958	0.606115	0.457366	0.575127	0.953743	0.627671	0.441418	0.689556	0.608599	0.590796	0.342792	0.325238	0.644555	0.523869	overlap
Lemd2	0.302849	0.302211	0.433745	0.276563	0.273699	0.280202	0.297001	0.30255	0.261925	0.265815	0.494663	0.522651	0.518294	0.45391	0.280786	1.43289	0.263066	0.36999	0.292154	0.29056	0.222996	0.342792	0.209373	0.298432	0.305692	overlap
Lrrc8d	0.205454	0.197214	0.127191	0.177375	0.136354	0.180061	0.162018	0.217144	0.172124	0.122647	0.354939	0.376699	0.423835	0.350556	0.199226	0	0.145731	0.116854	0.171985	0.150005	0.233613	0	0.0859444	0.163848	0.175155	overlap
Lsm2	0.598628	1.25489	0.782638	0.812364	0.596165	0.487802	1.25969	0.446509	0.705646	0.515489	0.484265	0.480468	0.657328	0.591327	0.461818	1.43289	1.23818	0.522728	0.673359	0.477346	0.462066	0.467589	0.40651	0.61477	0.480458	overlap
Luc7l2	1.48286	1.1483	1.2848	1.33071	1.37445	1.47313	1.35196	1.38486	1.30709	1.32811	1.63781	1.5292	1.50549	1.5123	1.51617	1.43289	1.43642	1.25371	1.29324	1.39321	1.6118	1.83873	1.20022	1.36407	1.47825	overlap
Luc7l3	0.60239	1.06656	0.776445	0.75328	0.656633	0.511577	0.738903	0.576494	0.678162	0.619194	0.475167	0.408206	0.45881	0.193224	0.485706	0.953743	0.864588	0.613603	0.636764	0.619091	0.611797	1.43404	0.47324	0.740717	0.686438	overlap
Lyl1	0.795241	0.855714	0.911623	0.90006	0.948429	0.725827	0.69782	0.660772	0.817831	0.786142	0.431085	0.327539	0.467673	0.359175	0.672748	0.953743	0.753252	0.75422	0.776886	0.799036	0.677979	1.10405	0.130207	0.780373	0.796303	overlap
Maff	0.319504	0.041066	0.124856	0.134936	0.111865	0.430882	0.0981741	0.237819	0.186247	0.178255	0.814127	0.550876	0.532436	0.43567	0.435473	0	0.18447	0.210479	0.195144	0.140079	0.381067	0.208001	0.583288	0.21653	0.19093	overlap
Man2a2	0.279816	0.176855	0.184911	0.251528	0.234682	0.308762	0.215768	0.172126	0.25894	0.214212	0.732963	0.638536	0.680061	0.659296	0.314773	0	0.201217	0.0797948	0.270372	0.220146	0.338655	0.559788	0.150095	0.308474	0.234573	overlap
Map2k3	0.388888	0.516121	0.453093	0.407542	0.328123	0.324592	0.347429	0.161818	0.342719	0.253422	0.630014	0.709771	0.628679	0.680445	0.326371	0	0.468287	0.317985	0.325537	0.234037	0.292456	0.354456	0.566307	0.301176	0.208655	overlap
Mat2a	1.39937	1.39018	1.54811	1.60591	1.25314	1.00923	1.11086	1.00996	1.31506	0.954595	1.23216	1.43026	1.59146	1.24914	0.9885	1.43289	1.19679	0.882453	1.2536	0.945584	1.13846	1.18186	1.00364	1.35105	1.0657	overlap
Mcl1	1.36002	0.951098	1.29063	0.984218	0.923827	1.51307	0.971851	1.28308	1.12128	1.00485	1.74528	1.53439	1.43289	1.52388	1.59001	1.43289	1.1152	1.23981	1.11224	0.950785	1.86979	0.697248	1.8787	1.34625	1.34526	overlap
Mcm3	0.340386	1.10045	0.258102	0.563172	0.285778	0.340394	1.19772	0.439877	0.694145	0.292894	0.353678	0.258759	0.526303	0.210984	0.326646	0	1.20201	0.208543	0.648998	0.278307	0.262928	0.817272	0.307868	0.505243	0.274299	overlap
Mcm6	0.382768	0.999547	0.377505	0.612488	0.298807	0.3417	1.11856	0.416545	0.70981	0.309936	0.294896	0.241708	0.423296	0.273021	0.360691	0	1.11843	0.398434	0.683454	0.329647	0.262076	1.29196	0.368864	0.586825	0.239702	overlap
Mcm7	0.180793	1.03647	0.240352	0.354412	0.202225	0.222023	1.15263	0.184061	0.512565	0.197549	0.173939	0.148049	0.348373	0.105705	0.222136	0	1.02121	0.199213	0.483436	0.19749	0.143258	1.10704	0.162954	0.394186	0.189452	overlap
Mef2c	1.2644	1.12194	1.18814	1.13415	1.14295	1.22598	1.2441	1.29013	1.10956	1.14419	1.74468	1.75501	1.66142	1.65156	1.27281	1.43289	1.11778	1.24606	1.13223	1.15995	1.49758	1.10405	1.20734	1.27223	1.3651	overlap
Meg3	0.912347	0.406363	0.875742	0.627867	1.13951	0.63387	0.0386911	0.768085	0.351214	0.81413	0.896165	0.778306	0.459834	1.17526	0.632952	0	0.0679891	0.861066	0.32043	0.778623	0.751226	0	0.959175	0.601513	1.07802	overlap
Mif	1.55155	1.65858	1.73284	1.99946	1.35384	1.33358	1.79945	1.65146	1.89161	1.18636	1.00776	1.28622	1.65115	0.870726	1.34088	1.99899	1.69857	1.5394	1.90534	1.19537	1.19601	0.559788	1.43823	1.63749	1.09517	overlap
Mindy1	0.301349	0.187205	0.347249	0.245034	0.258807	0.287013	0.141347	0.244926	0.221839	0.252067	0.673479	0.749448	0.601695	0.65504	0.294592	0	0.143393	0.228526	0.190494	0.226598	0.228477	0.208001	0.161565	0.258361	0.2853	overlap
Mkrn1	0.457235	0.405095	0.331056	0.379351	0.475373	0.482812	0.426702	0.477596	0.407749	0.455611	0.66652	0.630103	0.600442	0.712514	0.474338	0	0.490297	0.478376	0.419049	0.475591	0.549097	0.208001	0.394334	0.49733	0.539547	overlap
Mplkip	0.448682	0.541964	0.338268	0.501431	0.454124	0.455189	0.594353	0.250644	0.518795	0.464198	0.319064	0.254638	0.398032	0.0599934	0.459797	0	0.566385	0.360454	0.51988	0.473024	0.490405	0.90258	0.282256	0.542742	0.480876	overlap
Mrpl17	0.590379	0.706136	0.786904	0.771453	0.562175	0.472045	0.667279	0.358143	0.616005	0.461233	0.418344	0.405875	0.576767	0.263322	0.482359	0	0.603597	0.462648	0.599688	0.458908	0.543725	0.342792	0.459936	0.612493	0.388822	overlap
Mrpl34	0.57697	0.776448	0.377717	0.632509	0.565465	0.552723	0.844469	0.519369	0.670142	0.582455	0.420153	0.383165	0.495573	0.435784	0.586477	1.75548	0.67354	0.522626	0.668129	0.588366	0.536992	0.687464	0.330358	0.6848	0.576725	overlap
Mrpl51	0.511488	0.915315	0.557465	0.64105	0.49954	0.404966	0.763874	0.447478	0.548602	0.449807	0.332907	0.363789	0.471817	0.338374	0.403923	1.75548	0.763713	0.388766	0.52676	0.459773	0.485851	0.550793	0.351788	0.517332	0.407728	overlap
Mrps17	0.55843	0.623334	0.514912	0.705785	0.535111	0.43277	0.7949	0.441766	0.614157	0.462845	0.346104	0.392653	0.479918	0.365182	0.438715	0	0.768047	0.502509	0.586809	0.493661	0.415366	0.208001	0.387588	0.50467	0.394593	overlap
Msi2	1.18174	0.9881	1.15934	1.15619	1.04848	1.32601	1.01463	1.36416	1.26234	1.17441	1.58438	1.51003	1.67639	1.35537	1.34616	0.953743	1.12121	1.11857	1.28101	1.20606	1.31249	1.04772	1.26138	1.34818	1.28075	overlap
Mt1	0.115095	0.214244	0.129739	0.218165	0.0989489	0.111176	0.257459	0.128815	0.169859	0.0944011	0.486433	0.33905	0.305194	0.0380022	0.126862	0	0.253219	0.0749997	0.15809	0.0898785	0.074955	0	0.26101	0.21093	0.100734	overlap
Mtdh	1.38019	1.24522	1.40495	1.31383	1.30711	1.22441	1.18274	1.1248	1.24796	1.26598	1.11237	1.03432	1.1823	0.992059	1.26291	1.43289	1.00984	1.2399	1.29717	1.27452	1.30568	0.798655	1.1972	1.36658	1.2451	overlap
Myb	0.993572	0.908463	0.971513	1.17164	0.947974	0.774282	0.965715	0.68792	0.839639	0.760963	0.56392	0.303333	0.659508	0.279367	0.770775	0	0.808724	0.664098	0.836756	0.770342	0.768474	0.704924	0.287411	0.895284	0.844823	overlap
Myc	0.471799	0.337186	0.54922	0.51332	0.273998	0.484106	0.431527	0.516448	0.546542	0.336908	0.301588	0.128665	0.259607	0.196421	0.501734	0	0.391383	0.453951	0.528571	0.319167	0.435186	0.467589	0.178682	0.435678	0.295271	overlap
Mycn	0.543122	0.436337	0.598419	0.710717	0.681342	0.502587	0.473424	0.530974	0.70806	0.645847	0.124717	0.177851	0.237706	0.197935	0.433188	0.953743	0.316858	0.357289	0.629152	0.585395	0.657255	0.467589	0.467689	0.779006	0.644136	overlap
Myct1	0.931953	0.687353	0.880537	0.722202	0.836697	1.11634	0.884924	1.05671	0.909629	0.996077	1.18104	0.933704	1.1303	1.03736	1.129	0	0.903884	1.13398	0.925904	1.00853	1.02278	0.810381	0.554087	0.92564	0.930724	overlap
Myh9	0.511456	0.701074	0.365799	0.477352	0.415525	0.463042	0.514634	0.341548	0.469008	0.38993	0.857077	0.907353	0.819889	0.642065	0.484196	0	0.53492	0.493562	0.443921	0.36507	0.745988	0.354456	0.44353	0.489254	0.53372	overlap
Nceh1	0.574109	0.356219	0.527477	0.385122	0.574151	0.769267	0.507366	0.901657	0.563361	0.719814	1.18058	0.957936	0.944447	1.10869	0.740585	0.953743	0.407241	0.754067	0.523012	0.725424	1.07455	0.798655	1.31102	0.712582	0.88415	overlap
Nek6	0.0757762	0.0879428	0.0889362	0.0775645	0.076662	0.0794453	0.0877056	0.0319468	0.0747945	0.0826791	0.47508	0.601211	0.506666	0.509968	0.0755686	0	0.0323805	0.0812391	0.0811902	0.085138	0.0859538	0	0.0568376	0.0601239	0.0734469	overlap
Neurl3	0.771147	0.179102	1.10852	0.379645	0.636215	1.01214	0.338832	1.0335	0.67151	0.873886	1.98881	1.66689	1.62468	2.1404	1.12252	0	0.463345	1.04106	0.658946	0.881097	1.01643	0.687464	1.58998	0.680301	0.818066	overlap
Nfe2	0.682888	0.556091	0.76759	0.727223	0.673642	0.656716	0.530888	0.555923	0.724671	0.699209	0.589378	0.442001	0.638993	0.446445	0.634396	0.953743	0.595547	0.698077	0.691916	0.669157	0.635325	0.208001	0.314859	0.636443	0.636945	overlap
Nfkbia	0.547857	0.63984	0.796603	0.450006	0.566478	0.70607	0.597307	0.849764	0.544109	0.698866	0.844392	0.760416	0.697721	1.09964	0.711657	0.953743	0.63613	0.894645	0.59504	0.705447	0.871243	1.55494	2.18774	0.769026	0.803852	overlap
Ninj1	0.847375	0.582108	0.615082	0.925086	0.783262	0.840156	0.588211	0.635961	0.929858	0.860783	1.02405	1.08463	1.14802	1.03932	0.819932	0.953743	0.508156	0.748257	0.906727	0.838855	0.812642	0.810381	0.534688	0.837808	0.746681	overlap
Nisch	0.655275	0.64429	0.556272	0.681509	0.660174	0.6322	0.55143	0.502988	0.644624	0.617332	0.813445	0.855695	0.803821	0.63877	0.629656	0	0.51155	0.572219	0.617729	0.63261	0.585523	0.354456	0.428776	0.738839	0.674498	overlap
Nop56	0.853725	1.19076	0.788256	1.2663	0.748838	0.536401	1.12769	0.577382	0.962825	0.466203	0.403379	0.546107	0.78362	0.363477	0.509383	0	0.956883	0.547902	0.888363	0.442798	0.521642	0.704924	0.551845	0.821871	0.425594	overlap
Nrarp	0.102673	0.0874649	0.077702	0.0586845	0.0345736	0.13038	0.196934	0.0727427	0.0824214	0.0446231	0.292847	0.225577	0.31967	0.247923	0.137419	0	0.231401	0.0586857	0.0760418	0.0327721	0.0778109	0.208001	0.00197702	0.0311757	0.0325105	overlap
Nrros	0.368232	0.457559	0.206558	0.40054	0.313228	0.413148	0.38459	0.442824	0.436994	0.33152	0.237375	0.267408	0.331052	0.295812	0.368758	0.953743	0.25036	0.305605	0.399031	0.343559	0.462052	0.697248	0.499211	0.591487	0.398029	overlap
Odc1	0.602255	0.918292	0.4893	0.724165	0.429287	0.491229	0.828719	0.435986	0.598732	0.339954	0.71464	0.779578	0.97349	0.841675	0.539447	0.953743	0.918565	0.445915	0.6009	0.329388	0.464399	0.697248	0.446484	0.587739	0.403181	overlap
Osbpl9	0.488235	0.439934	0.761319	0.445526	0.461124	0.420572	0.450788	0.500363	0.374865	0.424344	0.726415	0.746447	0.792752	0.651086	0.443399	0	0.480717	0.600608	0.404484	0.418387	0.567932	0.208001	0.642389	0.492685	0.452095	overlap
P2rx4	0.43956	0.21259	0.262636	0.305884	0.345385	0.397472	0.186162	0.330351	0.308408	0.360074	0.665179	0.738446	0.667914	0.769195	0.418678	0	0.193565	0.375954	0.326526	0.340752	0.557092	0	0.458079	0.351685	0.405327	overlap
Pan3	0.360499	0.335718	0.374767	0.300831	0.30788	0.382306	0.3301	0.276231	0.346492	0.358198	0.598469	0.542902	0.477431	0.617862	0.382079	0	0.389256	0.268692	0.317874	0.352371	0.508201	0	0.348951	0.381894	0.475115	overlap
Pdcd6	0.855755	0.928625	0.686227	0.902167	0.812066	0.863316	0.756195	0.726327	0.869701	0.80909	1.11601	1.19757	1.21177	1.13499	0.831781	1.75548	0.85842	0.847822	0.864624	0.784559	0.703144	1.01185	0.690045	0.874265	0.755886	overlap
Pde10a	0.20732	0.0899289	0.155113	0.0786195	0.0345312	0.206979	0.15179	0.0359971	0.0928844	0.0388896	0.768576	0.819316	0.70895	0.499164	0.212493	0	0.214173	0.0599601	0.0733345	0.0235144	0.0802745	0	0.0388764	0.0498477	0.0413414	overlap
Pde3b	0.073966	0.151265	0.118481	0.0751164	0.0685906	0.0857346	0.0354201	0.0505728	0.0680058	0.0796254	0.327815	0.34085	0.345137	0.312561	0.0824915	0	0.0688578	0.0579267	0.0791608	0.0765845	0.0860638	0	0.0781966	0.0584641	0.0952361	overlap
Pde4b	0.328816	0.212488	0.218794	0.233813	0.219859	0.401344	0.21791	0.445001	0.314275	0.269219	0.875689	0.684226	0.845783	0.637	0.451154	0	0.292067	0.264414	0.329517	0.311858	0.439631	0.544258	0.914021	0.276652	0.298626	overlap
Pde4d	0.124879	0.0878761	0.163102	0.0899259	0.166346	0.167684	0.0937442	0.164592	0.119584	0.184966	0.636925	0.554765	0.54333	0.694577	0.170933	0	0.119414	0.124696	0.121069	0.18577	0.236605	0.208001	0.128227	0.152551	0.247615	overlap
Per1	0.235544	0.0963832	0.0873726	0.129406	0.117696	0.395329	0.137855	0.163943	0.2096	0.180661	1.07826	0.785583	0.746527	0.784547	0.366662	0	0.172024	0.224212	0.190758	0.151853	0.433421	0	0.273158	0.25433	0.257813	overlap
Phc2	0.302741	0.389618	0.424768	0.2932	0.330481	0.250521	0.262896	0.439524	0.24878	0.282527	0.436163	0.557016	0.385333	0.472701	0.259997	0	0.226985	0.491654	0.262994	0.266729	0.314993	0.342792	0.503061	0.26262	0.304738	overlap
Phgdh	0.809053	0.96708	0.803925	1.209	0.695716	0.827869	1.10389	0.739404	1.17915	0.752028	0.655824	0.752439	1.17607	0.52623	0.803297	0.953743	1.00247	0.756751	1.16488	0.738299	0.651231	0.637604	0.638294	1.02245	0.689337	overlap
Pik3ip1	0.560358	0.26355	0.673114	0.453015	0.677467	0.851842	0.465737	0.903929	0.678514	0.988757	1.32304	1.13482	1.0948	1.22493	0.807344	0	0.305687	0.784907	0.678068	0.962797	1.08596	0.90258	0.333674	0.774313	1.03378	overlap
Pim3	0.319017	0.119193	0.135547	0.198435	0.214272	0.426158	0.215942	0.299557	0.259769	0.217627	0.695344	0.70356	0.63168	0.580623	0.393796	0	0.184072	0.168631	0.26627	0.197112	0.362242	0.342792	0.396319	0.202998	0.259777	overlap
Plaur	0.0859457	0.0566907	0.122556	0.10049	0.0534318	0.117051	0.0811382	0.0594213	0.08916	0.0363042	1.33997	1.11205	1.06672	1.17766	0.11184	0	0.0109498	0.127913	0.0870495	0.0221608	0.117919	0	0.0417223	0.079147	0.0199354	overlap
Plk2	0.241821	0.0510123	0.0823188	0.103561	0.121841	0.343833	0.146978	0.133387	0.156841	0.199275	0.687353	0.374063	0.453197	0.270665	0.362177	0	0.137319	0.259671	0.176233	0.16141	0.294246	0	0.179268	0.171936	0.267426	overlap
Pnp	1.16868	1.31136	1.70539	1.33434	1.2864	1.0464	1.19769	1.45773	1.26598	1.1799	0.855085	0.813916	1.007	0.681158	1.04293	0	1.13937	1.48582	1.17967	1.12586	1.31971	1.10405	2.3259	1.40418	1.3436	overlap
Por	0.600305	0.548518	0.440265	0.69722	0.604947	0.56698	0.540938	0.657959	0.612499	0.573529	0.885084	1.02917	0.933476	0.859512	0.52582	0.953743	0.455777	0.545333	0.575648	0.570069	0.541004	0.898713	0.453972	0.595172	0.55145	overlap
Pou2f2	0.367818	0.266198	0.316111	0.265727	0.441777	0.49581	0.275368	0.432367	0.40456	0.532046	0.435175	0.307335	0.229722	0.51389	0.499321	0	0.233941	0.430106	0.395997	0.48483	0.556455	0	0.365643	0.476845	0.67887	overlap
Ppp1r13b	0.26549	0.435739	0.282134	0.251015	0.236062	0.264616	0.306256	0.304026	0.258138	0.265869	0.54949	0.491902	0.504518	0.27932	0.233264	0	0.150189	0.219749	0.226519	0.232162	0.136213	0.208001	0.179002	0.29785	0.262905	overlap
Ppp1r18	0.358927	0.387218	0.239189	0.307971	0.354461	0.367054	0.350495	0.382528	0.350871	0.342625	0.54274	0.623417	0.487726	0.576954	0.36535	0	0.25783	0.304716	0.348171	0.346592	0.24848	1.04192	0.337	0.421447	0.419124	overlap
Ppp2r5a	0.401524	0.327636	0.268183	0.393705	0.345978	0.358947	0.410665	0.416273	0.352836	0.321154	0.545138	0.616749	0.535067	0.421781	0.386795	0.953743	0.333081	0.291506	0.356995	0.351098	0.460072	0.208001	0.328679	0.443187	0.404104	overlap
Prdx6	1.86668	1.62654	1.78566	1.878	1.69851	1.89036	1.70033	1.50756	1.88941	1.65622	2.09285	2.18995	2.12865	2.1264	1.90969	2.35825	1.57844	1.73859	1.90732	1.65341	1.7539	1.61593	1.64913	1.79598	1.64341	overlap
Prkar1a	0.799693	0.842727	0.832575	0.816235	0.761797	0.722988	0.752763	0.65244	0.762478	0.675452	1.10003	1.06937	1.06216	0.905914	0.794838	1.43289	0.838284	0.743445	0.793797	0.713427	0.798777	1.18186	0.72118	0.842283	0.791488	overlap
Prtn3	1.70889	1.22472	1.60794	1.63995	1.5501	1.36134	0.791517	1.16572	1.15616	1.31128	1.08537	1.02895	1.0034	0.9529	1.36058	0	0.730728	1.30934	1.18548	1.32297	1.3447	0.342792	1.1815	1.20856	1.22808	overlap
Psmb8	1.41065	1.68377	2.12054	1.52466	1.43642	1.37887	1.60665	2.06867	1.53605	1.40011	1.18314	1.22225	1.293	1.1481	1.42421	1.43289	1.53956	2.03582	1.56334	1.45404	1.36093	1.75477	1.87605	1.47916	1.36457	overlap
Psme1	1.54782	1.68199	1.95083	1.73103	1.53994	1.48894	1.57427	2.04123	1.70349	1.45954	1.29813	1.44249	1.58066	1.3289	1.47652	1.43289	1.421	1.80448	1.70676	1.48701	1.44823	1.36153	1.79508	1.63518	1.40515	overlap
Ptbp2	0.166469	0.265819	0.120391	0.161675	0.160518	0.185892	0.162782	0.158862	0.171004	0.158893	0.330116	0.335728	0.344421	0.524569	0.200014	0	0.225007	0.0859492	0.182505	0.169089	0.142055	0.544258	0.177142	0.214098	0.192478	overlap
Ptprcap	1.83739	1.59642	1.75507	1.85982	1.88619	1.92844	1.73872	1.82307	1.97591	1.96867	1.78311	1.72489	1.71182	1.76027	1.93784	1.75548	1.72208	1.96076	1.99688	1.98232	1.69258	1.5629	1.54943	1.82389	1.80835	overlap
Rab27b	0.128282	0.192984	0.112055	0.15892	0.112638	0.163042	0.287458	0.160245	0.1782	0.157323	0.447541	0.533638	0.464114	0.296284	0.18791	0.953743	0.203123	0.116474	0.186792	0.158888	0.184851	0.208001	0.0952289	0.196273	0.166656	overlap
Rab4a	0.124525	0.0888792	0.165711	0.111796	0.137272	0.153764	0.0804464	0.149377	0.141275	0.156943	0.305694	0.399934	0.342551	0.542614	0.148627	0	0.065038	0.0743103	0.147672	0.15334	0.166142	0	0.11957	0.101898	0.184569	overlap
Rabgef1	0.0718316	0.129704	0.0797001	0.0509386	0.0514227	0.070533	0.0766722	0.019084	0.0499752	0.0459242	0.336898	0.297626	0.298353	0.458275	0.0883085	0	0.0342343	0.0758258	0.0606906	0.0523666	0.0699692	0	0.135689	0.0878114	0.0993087	overlap
Rack1	3.447	3.26826	3.2527	3.50165	3.45181	3.45413	3.30985	3.41955	3.53747	3.49574	3.21879	3.33553	3.32306	3.3353	3.45774	3.54106	3.36362	3.42495	3.55274	3.50089	3.22195	3.46313	3.22296	3.37258	3.31269	overlap
Rad50	0.390377	0.7388	0.350062	0.470421	0.40969	0.423332	0.812467	0.422057	0.549869	0.374029	0.354181	0.289432	0.440121	0.202321	0.397075	0.953743	0.670035	0.381577	0.511253	0.381773	0.514089	0.559788	0.36059	0.572583	0.443248	overlap
Rasa2	0.16215	0.17879	0.244401	0.153121	0.140435	0.127984	0.10662	0.0782385	0.138983	0.126456	0.321299	0.367434	0.288837	0.383719	0.122752	0	0.184739	0.131218	0.123116	0.121076	0.167594	0	0.115974	0.156684	0.170917	overlap
Rbm38	0.757874	0.519688	0.634687	0.758317	0.791316	0.69055	0.568307	0.630477	0.668262	0.732518	0.457253	0.333831	0.4056	0.308969	0.710976	1.99899	0.714811	0.612405	0.657959	0.758731	0.634604	0.898713	0.193205	0.63612	0.657961	overlap
Retreg1	0.491671	0.383237	0.350325	0.371582	0.480622	0.673821	0.473166	0.503786	0.555996	0.6712	0.455314	0.297209	0.3572	0.622367	0.694467	0.953743	0.502228	0.54418	0.568728	0.703863	0.822594	0.208001	0.544099	0.648326	0.750192	overlap
Rfc2	0.391948	0.864462	0.456694	0.508006	0.356866	0.441316	1.13111	0.244458	0.642251	0.405203	0.423311	0.331939	0.410195	0.217847	0.441713	0	0.975536	0.433354	0.622088	0.41099	0.402388	0.637604	0.338986	0.598507	0.442297	overlap
Rgs1	1.22877	0.782136	1.31964	0.888975	0.561899	1.34399	0.923366	0.90479	0.994151	0.597668	0.727162	0.443717	1.00944	0.448801	1.31943	1.43289	0.805212	0.724861	1.00658	0.5814	1.16599	1.24109	1.45756	0.7657	0.451677	overlap
Rgs2	0.95939	0.553475	0.552971	0.468208	0.292418	1.17323	0.64487	0.725504	0.603813	0.431729	0.708095	0.490108	0.609155	0.35595	1.2299	1.43289	0.713434	0.562344	0.652802	0.350287	0.854098	0.550793	0.473815	0.506098	0.337915	overlap
Rnf125	0.200063	0.134222	0.112751	0.180677	0.190444	0.288797	0.199495	0.271572	0.221705	0.233883	0.968442	0.897913	0.886268	0.715655	0.301621	0	0.169136	0.25048	0.213748	0.212468	0.277646	0.342792	0.0930733	0.229636	0.24584	overlap
Rnf4	0.641809	0.530379	0.636541	0.559107	0.423753	0.627892	0.640719	0.548391	0.53822	0.387808	0.701574	0.612742	0.813017	0.424231	0.680324	1.75548	0.638327	0.348291	0.539617	0.38556	0.736832	0	0.562963	0.555212	0.44242	overlap
Rora	0.192364	0.0818533	0.118149	0.107489	0.185931	0.234663	0.0819314	0.204351	0.167924	0.24924	0.480391	0.319553	0.345823	0.378364	0.287041	0	0.210651	0.192011	0.177641	0.252469	0.287	0.342792	0.181002	0.244739	0.322964	overlap
Rpl35	2.59683	2.5318	2.47205	2.65213	2.60906	2.66314	2.67919	2.69655	2.76374	2.71817	2.86862	2.96875	2.97347	2.83341	2.51678	2.4988	2.54826	2.55985	2.62082	2.56538	2.86325	2.78856	2.8744	3.0233	2.93327	overlap
Rpl36al	0.831014	0.854742	0.722824	0.958689	0.723597	0.657107	0.943669	0.652044	0.840011	0.674507	0.796916	0.995538	1.15228	0.95854	0.7878	1.43289	0.884629	0.747657	0.969482	0.778705	0.906605	1.15505	0.957837	1.11237	0.892023	overlap
Rpl38	3.07231	2.64158	2.93818	3.04505	3.1109	3.15222	2.84904	3.12185	3.1602	3.22057	3.2339	3.36681	3.25724	3.3381	2.93499	3.44402	2.61005	2.90259	2.98547	3.00295	3.4736	3.28471	3.37037	3.48674	3.51047	overlap
Rpl8	3.58552	3.45706	3.59583	3.60378	3.61554	3.56096	3.49238	3.52465	3.61404	3.6051	3.30826	3.47599	3.4253	3.44083	3.58933	3.85581	3.53099	3.58166	3.66168	3.62928	3.38907	3.27621	3.3287	3.44093	3.42947	overlap
Rps18	3.85425	3.69543	3.76965	3.88365	3.87396	3.92994	3.79421	3.88063	3.98123	3.97764	3.64772	3.78257	3.79698	3.71442	3.91588	3.889	3.76065	3.96507	3.9859	3.95628	3.74507	3.70213	3.69479	3.81283	3.77793	overlap
Rps27	3.32659	2.86421	3.31587	3.2262	3.42573	3.52017	3.09635	3.49024	3.41527	3.60679	3.65013	3.74529	3.55906	3.71877	3.32462	3.85581	2.84263	3.34887	3.23472	3.41111	3.72433	3.59719	3.64887	3.66563	3.80698	overlap
Rps28	2.67647	2.45398	2.56712	2.65405	2.7154	2.79916	2.63749	2.76193	2.81847	2.84891	3.0141	3.13756	3.04212	3.08226	2.67466	2.92044	2.45616	2.66936	2.68844	2.70349	3.2769	3.25496	3.1915	3.28693	3.29358	overlap
Rsrp1	1.31598	1.16249	1.55236	1.28614	1.52434	1.29883	1.18799	1.37096	1.29883	1.5439	0.84935	0.836684	0.63957	0.774427	1.36654	1.43289	1.12894	1.52382	1.37562	1.59729	1.46387	1.58995	1.05847	1.4491	1.63963	overlap
Runx2	0.300219	0.247056	0.279967	0.287383	0.224373	0.315222	0.232876	0.225398	0.282839	0.248794	0.539974	0.403112	0.492037	0.367037	0.306272	0	0.120372	0.268213	0.273054	0.264139	0.343962	0	0.194335	0.376348	0.329857	overlap
Samsn1	0.683262	0.778374	0.366576	0.568811	0.648978	0.644827	0.585195	0.493025	0.587357	0.629699	0.772617	0.723237	0.86374	0.774746	0.619694	0	0.558498	0.609008	0.578035	0.622129	1.04848	1.01185	2.19822	1.02355	0.929792	overlap
Selplg	0.297281	0.383231	0.349935	0.266717	0.335808	0.408537	0.570672	0.486724	0.374434	0.379131	0.634511	0.708145	0.573174	0.585813	0.409523	0	0.554187	0.302529	0.388977	0.42024	0.467943	0.208001	0.327332	0.384147	0.387032	overlap
Serpina3g	1.68627	1.53853	2.91008	1.72269	1.76205	1.39605	1.09155	2.77338	1.43555	1.43838	0.991058	0.896561	0.933541	0.981304	1.37573	0	0.912441	2.72928	1.3468	1.41969	1.89092	1.10405	4.31133	1.86362	1.80292	overlap
Sik1	0.61317	0.164104	0.312069	0.36206	0.341197	0.721122	0.339508	0.614286	0.443122	0.407891	1.01511	0.744937	0.81423	0.879783	0.675011	0	0.413112	0.449734	0.395474	0.303226	0.913865	0	0.476105	0.486875	0.493055	overlap
Sipa1l1	0.1358	0.209106	0.193397	0.126391	0.132826	0.120537	0.118623	0.15547	0.131196	0.124356	0.3095	0.258353	0.382349	0.158587	0.131278	0.953743	0.185349	0.124069	0.140644	0.130536	0.194983	0	0.277244	0.171809	0.161295	overlap
Sirt3	0.679944	0.700754	0.776196	0.681482	0.727899	0.79405	0.772623	0.660298	0.76077	0.856401	0.532818	0.538172	0.550308	0.56952	0.833172	0.953743	0.742082	0.809125	0.791266	0.881141	0.824315	0.559788	0.645919	0.82189	0.923376	overlap
Skil	0.82147	0.303706	0.598231	0.347561	0.167351	0.735354	0.304695	0.358118	0.338731	0.174788	1.01045	0.622089	0.790224	0.344831	0.875666	0	0.528104	0.511953	0.402928	0.191699	0.896015	0.697248	0.824052	0.358788	0.282836	overlap
Sla2	0.163217	0.130656	0.0653661	0.151512	0.175746	0.236251	0.20261	0.195256	0.20823	0.244195	0.639471	0.708123	0.555862	0.652896	0.240523	0	0.247192	0.197901	0.234196	0.252504	0.168312	0.354456	0.143985	0.221955	0.260719	overlap
Slc38a1	0.798732	0.611472	0.612986	0.719425	0.609164	0.824169	0.679763	0.527181	0.673949	0.548694	0.883814	0.905742	1.02229	0.676189	0.857407	0	0.613897	0.736195	0.699595	0.534043	0.665299	0.559788	0.368547	0.671942	0.661628	overlap
Slc3a2	0.998049	0.89701	1.08887	1.10251	0.875904	0.974259	0.865079	0.904895	0.974502	0.821846	1.22047	1.1941	1.13357	0.831801	0.962563	0	0.819519	0.9209	0.928047	0.774797	0.798714	0.980396	0.739946	0.814686	0.728054	overlap
Smim3	0.178355	0.184426	0.395252	0.185099	0.19024	0.181337	0.142818	0.165137	0.161289	0.137167	0.531463	0.456135	0.574282	0.439594	0.206431	0	0.126064	0.135828	0.155577	0.17312	0.226883	0.550793	0.265582	0.22276	0.191805	overlap
Snap23	0.671023	0.337382	0.477874	0.660697	0.676556	0.441302	0.320395	0.680753	0.451072	0.471817	0.75363	0.814714	0.724426	0.652892	0.466639	0.953743	0.277412	0.610197	0.46415	0.499691	0.406897	0.208001	0.761868	0.540644	0.529817	overlap
Snrk	0.1583	0.157215	0.0816438	0.122748	0.15509	0.157681	0.168148	0.12664	0.148279	0.158371	0.590917	0.560655	0.463314	0.462403	0.182537	0	0.0846184	0.144338	0.139721	0.177796	0.142322	0	0.16191	0.211941	0.240103	overlap
Snrpc	1.09317	1.00377	0.906226	0.898253	0.719413	1.18656	1.17439	1.05531	0.997429	0.812822	0.901234	0.712728	0.82646	0.645939	1.17246	1.43289	1.23245	0.839464	1.0165	0.794993	0.949497	1.18186	0.632625	0.822562	0.705746	overlap
Snrpg	0.737471	1.04098	0.651906	0.845228	0.721298	0.799729	1.24843	0.979061	0.905154	0.790381	1.01854	1.05449	1.08159	1.07936	0.748155	1.43289	1.10782	0.698781	0.834049	0.697865	1.01808	1.32507	1.00419	1.12007	1.0379	overlap
Socs3	0.313266	0.132986	0.131526	0.199414	0.129233	0.404058	0.214538	0.187413	0.197918	0.0910297	0.484897	0.291771	0.516706	0.464323	0.453342	0	0.290446	0.127627	0.19421	0.0813827	0.66601	1.09187	1.37229	0.376299	0.299219	overlap
Sox4	0.79557	0.853686	0.624959	0.936709	0.644907	0.923773	0.692625	0.860189	0.9509	0.77496	0.555421	0.439072	0.705333	0.205499	0.877924	0	0.637302	0.643079	0.93006	0.803587	0.855445	0.697248	0.372994	0.905141	0.803444	overlap
Spns2	0.518498	0.530131	0.379697	0.470007	0.468195	0.617182	0.610359	0.499656	0.595829	0.580839	0.683349	0.739629	0.836961	0.717435	0.649131	1.75548	0.529952	0.433317	0.624783	0.573817	0.796897	1.18186	0.49843	0.695808	0.60666	overlap
Srgn	2.32718	2.24658	2.44492	2.30494	2.23985	2.47414	2.49193	2.44826	2.43168	2.36622	2.66361	2.60732	2.66754	2.5694	2.47554	2.19467	2.43059	2.33602	2.43021	2.32583	2.41449	2.48866	2.37207	2.30295	2.25515	overlap
Srrm1	0.935601	1.09665	0.926182	1.00822	0.881687	0.806451	1.08254	0.80172	0.86668	0.735648	1.11317	1.0636	1.12207	0.981467	0.833947	0	1.08953	0.781453	0.859609	0.736396	0.878491	1.01185	0.929784	0.953696	0.918751	overlap
Srsf5	2.00617	1.64968	1.88903	1.80425	1.75867	2.08225	1.65518	2.03977	1.78348	1.83552	2.32503	2.25449	2.14565	2.37531	2.11445	2.4988	1.60337	1.88449	1.78485	1.80504	2.03478	1.89697	1.9603	1.79086	1.78787	overlap
St7	0.240056	0.216482	0.236834	0.224384	0.236667	0.298836	0.189287	0.273307	0.254556	0.286342	0.636332	0.602918	0.525753	0.527403	0.284839	0	0.316398	0.222188	0.288598	0.282336	0.248456	0.810381	0.288307	0.357048	0.375502	overlap
St8sia4	0.336304	0.227708	0.234838	0.226972	0.420761	0.378528	0.142297	0.537684	0.222719	0.396359	0.643596	0.620822	0.474392	1.19427	0.349894	0	0.15526	0.40113	0.21964	0.34897	0.385203	0	0.54028	0.304748	0.437746	overlap
Stap1	0.528755	0.467492	0.510247	0.469869	0.48183	0.664172	0.525585	0.663963	0.632203	0.655347	0.567558	0.45306	0.497203	0.381813	0.61233	0.953743	0.497922	0.578215	0.648817	0.675082	0.752976	0.810381	0.533573	0.746602	0.761677	overlap
Stat4	0.294419	0.199067	0.267923	0.252757	0.283292	0.36021	0.311854	0.428154	0.306592	0.329916	0.756211	0.683215	0.661486	0.626519	0.375453	0.953743	0.318053	0.480281	0.308134	0.336819	0.633552	0.342792	0.430806	0.441576	0.462551	overlap
Stk17b	0.397205	0.286501	0.383312	0.214124	0.185609	0.509121	0.253431	0.290099	0.286801	0.232693	0.942813	0.778126	0.832266	0.729363	0.505785	0.953743	0.359262	0.279899	0.282146	0.204641	0.576418	0.354456	0.374591	0.287473	0.222937	overlap
Stxbp5	0.283367	0.247766	0.173989	0.245198	0.2115	0.299027	0.307416	0.382551	0.261985	0.23611	0.747272	0.690112	0.724665	0.793837	0.294521	0	0.206708	0.301445	0.269601	0.241604	0.423322	0.354456	0.412456	0.323749	0.305279	overlap
Sult1a1	0.694342	0.256411	0.491989	0.509358	0.844925	0.550053	0.219813	0.365541	0.437311	0.624743	0.82187	1.0817	0.633445	0.924952	0.450247	0.953743	0.203059	0.426505	0.356628	0.475109	0.739067	0	0.747853	0.643775	0.862621	overlap
Swap70	0.334726	0.218051	0.421882	0.232256	0.286096	0.381224	0.260269	0.294192	0.326731	0.345805	0.689824	0.62025	0.436536	0.271946	0.407499	0.953743	0.259222	0.367119	0.334228	0.385789	0.463666	0	0.329061	0.383478	0.375932	overlap
Taldo1	0.658531	0.86052	0.551077	0.825004	0.552119	0.712113	0.793926	0.665083	0.871376	0.637688	0.625422	0.561431	0.788579	0.517687	0.700815	0	0.864733	0.698426	0.897587	0.629465	0.695915	0.898713	0.558416	0.754781	0.535007	overlap
Tgfb1	0.549019	1.08883	0.54843	0.680413	0.523561	0.600396	0.951419	0.520857	0.677802	0.440654	0.734519	0.899672	0.905994	0.706693	0.633057	0	1.02795	0.305381	0.71181	0.445958	0.496264	1.208	0.441863	0.600668	0.440285	overlap
Tgm2	0.980447	0.648008	1.26224	0.996789	0.921689	0.452034	0.449126	0.738157	0.508302	0.499866	0.710698	0.83049	0.839799	0.765821	0.439629	1.75548	0.353698	0.774237	0.520225	0.48497	0.749292	0	1.50914	0.6817	0.579421	overlap
Timm13	0.802702	0.921062	0.697693	1.03935	0.757962	0.655642	0.969406	0.588318	0.891138	0.640563	0.464478	0.539664	0.757869	0.439114	0.623956	0.953743	0.952056	0.633816	0.884595	0.676875	0.569322	0.467589	0.472877	0.722638	0.597675	overlap
Tipin	0.265094	0.921942	0.268026	0.390843	0.206811	0.188992	1.00884	0.31023	0.43914	0.170494	0.173946	0.242675	0.406697	0.254656	0.211364	0	0.865181	0.174454	0.405358	0.172861	0.177411	0.637604	0.160261	0.348673	0.190421	overlap
Tmed5	0.861433	0.54722	0.915137	0.834926	0.64206	0.764228	0.65011	0.7488	0.70813	0.528092	1.09022	1.02254	1.04062	1.00857	0.758704	0	0.67062	0.527859	0.681896	0.526293	0.903593	0.752259	1.12541	0.724249	0.592389	overlap
Tmem158	0.292677	0.24497	0.176994	0.290882	0.326734	0.218847	0.186334	0.212294	0.208568	0.24515	0.438408	0.591792	0.407024	0.37956	0.204685	0.953743	0.14228	0.252362	0.195207	0.222445	0.423442	0.354456	0.673827	0.365555	0.447554	overlap
Tmod3	0.701734	0.659974	0.731773	0.613277	0.646573	0.558888	0.616105	0.609754	0.48798	0.478762	0.860123	0.8035	0.771047	0.913722	0.548536	0.953743	0.523083	0.665244	0.506515	0.501711	0.598178	0.752259	1.00596	0.548299	0.629005	overlap
Tmsb10	1.01423	1.48766	1.22278	1.12291	0.978585	1.04999	1.39841	1.23239	1.20691	0.993756	1.31741	1.34751	1.51214	1.47425	0.997648	1.43289	1.25192	1.07621	1.1215	0.945874	1.15869	1.78373	1.2412	1.32644	1.26978	overlap
Tnrc18	0.204962	0.19301	0.177426	0.131678	0.156252	0.189818	0.187021	0.314145	0.155251	0.164214	0.547716	0.440955	0.489643	0.355222	0.186678	0	0.164876	0.131544	0.144278	0.170017	0.244162	0.550793	0.21207	0.215285	0.24245	overlap
Tns1	0.260708	0.171716	0.260324	0.179769	0.267697	0.32336	0.146498	0.228053	0.244585	0.315317	0.659365	0.559283	0.400108	0.543156	0.31101	0.953743	0.150554	0.251992	0.228747	0.303939	0.36702	0	0.36182	0.335971	0.460747	overlap
Tpst2	0.471903	0.57077	0.542384	0.538374	0.471626	0.514609	0.528161	0.632854	0.587419	0.528221	0.750684	0.802869	0.729199	0.848886	0.478649	0.953743	0.509784	0.552387	0.544273	0.475947	0.607959	0	0.667652	0.592661	0.578781	overlap
Trim47	0.78416	0.367218	0.79291	0.657371	0.789538	0.691521	0.555987	0.61303	0.612827	0.783317	0.420842	0.150209	0.266449	0.191312	0.738427	0.953743	0.462855	0.599859	0.634838	0.770433	0.695026	0.550793	0.292905	0.624919	0.756498	overlap
Trim6	0.0721874	0.115382	0	0.0799034	0.0795415	0.0821817	0.062594	0.10845	0.0714345	0.0855027	0.212796	0.202255	0.275346	0.115772	0.0803433	0.953743	0.110958	0.126784	0.0801724	0.0853594	0.124006	0	0.0650158	0.149913	0.120444	overlap
Trir	0.944495	1.0373	0.994252	1.08999	0.922943	0.8415	1.12415	0.919735	0.972119	0.835253	0.781132	0.747888	0.868675	0.819092	0.852225	0	1.17677	0.748506	0.924351	0.858596	0.951181	0.980396	0.841693	0.923671	0.859419	overlap
Trp53	0.935069	1.17466	1.10502	1.06544	0.879359	0.84167	1.23888	0.872202	1.04225	0.829532	0.667631	0.568419	0.830248	0.621396	0.809656	0.953743	1.07706	0.775078	1.04745	0.821495	0.89893	1.32507	0.817365	1.02893	0.867583	overlap
Tsc22d1	1.69141	1.08929	1.64242	1.30349	1.24278	1.57094	1.01334	1.57764	1.2053	1.16012	2.52402	2.30326	2.12296	2.26379	1.60242	0.953743	1.07006	1.35924	1.25436	1.12247	1.62311	0.898713	1.36263	1.29113	1.229	overlap
Tsc22d3	0.819141	0.625368	0.839198	0.675463	0.815818	1.34408	0.86159	1.21903	1.06887	1.24771	2.7974	2.64167	2.32528	2.72208	1.26204	0	0.773101	1.1373	1.05018	1.24614	1.43882	1.09756	0.598167	1.26479	1.29809	overlap
Tspan32	0.729596	0.721044	0.511617	0.773511	0.847025	0.927546	0.923093	0.72271	0.967631	0.976903	0.841894	0.720942	0.811155	0.923143	0.914173	0.953743	0.990824	0.84137	0.993918	1.00859	0.901486	1.01185	0.473055	0.947528	0.935407	overlap
Txndc11	0.260098	0.158094	0.287717	0.25954	0.169507	0.156975	0.15302	0.107204	0.146889	0.0892607	0.435517	0.579482	0.538467	0.370532	0.169731	0	0.139297	0.165004	0.161351	0.0857588	0.140213	0	0.0934232	0.140301	0.12351	overlap
Txnip	1.67092	1.25593	1.56065	1.59176	2.02898	1.94165	1.33096	1.92953	1.76022	2.32194	2.19904	2.30404	1.88636	2.53938	1.87223	2.35825	1.32404	2.19117	1.7738	2.37182	1.89376	1.75184	1.35236	1.88602	2.40697	overlap
Txnrd1	0.502806	0.526178	0.612223	0.451854	0.415258	0.39914	0.391908	0.266363	0.418949	0.367607	0.548723	0.654801	0.68517	0.187198	0.436417	0.953743	0.400331	0.342989	0.410705	0.356807	0.407301	1.04192	0.800877	0.459869	0.46194	overlap
Uba52	0.666503	0.657131	0.636265	0.640712	0.662089	0.769346	0.806924	0.694568	0.795506	0.803728	1.03251	1.08371	0.976862	0.931221	1.08613	0.953743	1.05088	1.07714	1.15355	1.13617	0.857592	1.01185	0.882614	0.954259	1.02136	overlap
Ubc	2.01432	1.77182	1.97534	1.5745	1.67199	2.19008	1.79806	2.08448	1.81072	1.85253	2.13651	2.09219	1.91127	2.13885	2.31952	1.99899	1.82593	1.9448	1.86633	1.8819	2.00438	1.98225	1.89664	1.81255	1.85346	overlap
Ubl3	0.466796	0.238941	0.366583	0.309273	0.380906	0.435102	0.357692	0.501033	0.321905	0.353337	0.58021	0.599115	0.566291	0.681395	0.489765	0	0.346927	0.435598	0.330152	0.345367	0.599048	0.342792	0.738652	0.439868	0.524616	overlap
Ucp2	0.698059	0.943813	0.707642	0.768071	0.636117	0.768347	1.13078	0.735896	0.872118	0.691422	1.18325	1.36872	1.30157	1.11297	0.773484	1.43289	0.991839	0.653932	0.860967	0.744544	0.746123	0	0.695571	0.802405	0.705081	overlap
Upp1	0.352818	0.0592928	0.353241	0.227143	0.342421	0.293118	0.107939	0.31092	0.225443	0.303743	0.774523	0.744807	0.524522	0.630537	0.322188	0	0.113988	0.455604	0.216964	0.329257	0.413036	0	0.367358	0.249052	0.332663	overlap
Vamp2	0.272529	0.17695	0.201667	0.225789	0.245204	0.353804	0.21744	0.210834	0.258646	0.289461	0.520982	0.471739	0.488978	0.428599	0.333101	0	0.304897	0.306259	0.253683	0.26441	0.404822	0	0.170802	0.212133	0.284422	overlap
Vamp5	1.26409	1.48427	1.38687	1.50357	1.23585	1.1635	1.43914	1.28437	1.37206	1.11682	0.880511	0.773647	1.01884	0.469653	1.15087	0.953743	1.2531	0.958202	1.34707	1.11417	1.08539	1.55267	0.876001	1.24762	0.923516	overlap
Vapa	0.957773	0.833116	0.855524	1.07603	0.919449	0.792647	0.844786	0.989732	0.876105	0.758966	1.10234	1.2091	1.22342	0.958154	0.816556	0	0.763876	0.811427	0.887493	0.776372	0.893751	1.15311	0.944573	0.928403	0.78366	overlap
Vdac3	0.799651	1.26745	0.812782	0.979524	0.790725	0.760215	1.21849	0.875596	0.92817	0.733988	0.548359	0.670436	0.823784	0.514154	0.780152	1.43289	1.18174	0.935059	0.934954	0.774302	0.738218	0.697248	0.756566	0.922819	0.731115	overlap
Wnk1	0.701952	0.770547	0.838237	0.661146	0.679547	0.680051	0.732438	1.07193	0.662982	0.637807	1.07052	0.974618	0.988984	1.09167	0.704979	0	0.786095	0.907396	0.702876	0.659609	0.7418	1.04772	1.0688	0.795362	0.836518	overlap
Ywhaz	1.18099	1.1656	0.878745	1.16991	1.03267	1.07749	1.10184	1.1049	1.05156	0.935691	1.4116	1.24813	1.29111	1.14375	1.12022	1.99899	1.07333	1.01326	1.06126	0.933194	1.18194	1.53065	1.13076	1.23063	1.06942	overlap
Zbtb20	1.11083	0.7213	0.868342	0.937879	1.0158	1.20905	0.820094	1.02886	0.93826	1.07926	1.42904	1.40609	1.3523	1.25798	1.19941	0	0.614676	1.14726	0.983433	1.12306	1.39818	1.61593	1.25887	1.15381	1.2477	overlap
Zfand5	0.948374	0.837234	0.717923	0.901218	0.960148	0.979676	0.72117	0.763913	0.909012	0.927165	0.88851	0.740214	0.722409	0.740626	0.999752	0	0.83882	0.814136	0.933113	0.967702	1.05763	0.865208	0.98845	1.08221	1.06695	overlap
Zfp608	0.609895	0.350878	0.478494	0.523455	0.566225	0.577037	0.352562	0.520176	0.455024	0.521383	0.403786	0.220246	0.295308	0.269371	0.610279	0	0.39751	0.521941	0.495277	0.552691	0.728782	0.342792	0.448301	0.599298	0.602853	overlap
Zyx	0.56908	0.613647	0.727884	0.5246	0.53327	0.642572	0.583877	0.629193	0.570585	0.566768	0.783182	0.810423	0.739102	0.789866	0.663024	0.953743	0.621849	0.530875	0.568398	0.567324	0.745838	0.980396	0.470346	0.59329	0.634851	overlap
mt-Co1	4.62735	4.31126	4.61167	4.48257	4.67006	4.67392	4.25941	4.54117	4.51281	4.68681	4.85489	4.82235	4.69982	4.94715	4.6935	4.86929	4.34879	4.62487	4.55475	4.71635	4.81516	4.52072	4.59654	4.66416	4.79622	overlap
mt-Nd1	2.61973	2.77951	2.57243	2.68793	2.61377	2.64274	2.75251	2.64583	2.7043	2.56574	2.90288	2.99741	3.05505	3.03593	2.58455	2.622	2.844	2.49907	2.65871	2.54143	2.75691	2.33509	2.713	2.81934	2.72224	overlap
mt-Nd2	2.8359	2.70845	2.61174	2.84695	2.78378	2.93066	2.79467	2.82284	2.94695	2.86168	3.09172	3.22373	3.26444	3.14968	2.85246	2.35825	2.80686	2.69171	2.89313	2.82126	3.00442	2.85968	2.82359	2.98479	2.94411	overlap
mt-Nd3	1.6387	1.49294	1.55795	1.68992	1.57875	1.81774	1.67324	1.83434	1.83396	1.67755	2.1545	2.23267	2.22829	2.33831	1.53918	1.75548	1.49671	1.39433	1.57505	1.42356	2.19108	1.88251	2.07224	2.26177	2.1377	overlap

## Sheet: dmPGE2_nocutoff
	GCSF_Activated	GCSF_Cell-cycle	GCSF_Interferon	GCSF_Metabolism	GCSF_Quiescent	ct_Activated	ct_Cell-cycle	ct_Interferon	ct_Metabolism	ct_Quiescent	dmPGE2_Activated	dmPGE2_Acute-Activation	dmPGE2_Metabolism	dmPGE2_Quiescent	indo_Activated	indo_Acute-Activation	indo_Cell-cycle	indo_Interferon	indo_Metabolism	indo_Quiescent	pIC_Activated	pIC_Cell-cycle	pIC_Interferon	pIC_Metabolism	pIC_Quiescent	specific
0610010K14Rik	0.219264	0.338955	0.34816	0.316604	0.200258	0.185409	0.447993	0.171023	0.237065	0.169853	0.188073	0.272396	0.275396	0.184957	0.185828	0	0.361599	0.237927	0.241586	0.167674	0.236264	0.354456	0.237177	0.29424	0.197811	HSC_only
1110004E09Rik	0.224805	0.323154	0.382251	0.313897	0.177077	0.151732	0.262353	0.107606	0.247669	0.159417	0.135279	0.190934	0.223562	0.0347822	0.174954	0	0.239256	0.17683	0.269341	0.152162	0.190242	0	0.124943	0.229938	0.161661	HSC_only
1110008F13Rik	0.957417	1.1716	1.10791	1.10688	0.876992	0.87329	1.22331	0.930097	1.00992	0.799107	0.824272	0.751612	0.928113	0.798117	0.889407	1.43289	1.14923	1.04418	1.03156	0.760274	0.845069	0.90258	0.746076	0.922662	0.730956	HSC_only
1110038F14Rik	0.467129	0.338213	0.786197	0.457232	0.448204	0.388542	0.438276	0.424216	0.408459	0.37412	0.391495	0.4064	0.3224	0.289869	0.393305	1.43289	0.35867	0.342162	0.408433	0.392074	0.506731	0.342792	0.318979	0.444013	0.431709	HSC_only
1190005I06Rik	0.0487948	0.0514693	0.0337877	0.0534646	0.0279356	0.0406548	0.05766	0	0.0584393	0.0395442	0.016947	0.0392106	0.0885952	0	0.0479641	0	0.0240071	0.0133335	0.0508887	0.0436288	0.107065	0	0.0230796	0.0302072	0.0484464	HSC_only
1700008J07Rik	0.0394487	0.109411	0.121757	0.0553382	0.0440223	0.0490283	0.123689	0.0234321	0.0605936	0.0602427	0.0317638	0.040689	0.0379724	0.0290699	0.0422634	0	0.0834737	0.0141342	0.0613878	0.0584067	0.0298706	0	0.0359232	0.0649679	0.0642755	HSC_only
1700021F05Rik	0.10128	0.231068	0.0425184	0.160413	0.114948	0.115745	0.235512	0.0777402	0.130383	0.108197	0.0927734	0.0980123	0.108911	0.0632387	0.12479	0.953743	0.144383	0.111982	0.142153	0.109576	0.153324	0	0.0837864	0.158543	0.112092	HSC_only
1700097N02Rik	0.0435749	0.175582	0	0.0554716	0.0507875	0.0661246	0.244606	0.0317074	0.0888467	0.0650387	0.0572706	0.0638731	0.0852123	0.0335932	0.0717445	0	0.272658	0.0447154	0.0885759	0.0730212	0.0361593	0.342792	0.0454817	0.113289	0.0905491	HSC_only
1700123O20Rik	0.333799	0.430782	0.166991	0.354501	0.360438	0.339447	0.336903	0.441742	0.362286	0.360787	0.324866	0.253418	0.314374	0.263192	0.338804	0.953743	0.414436	0.297501	0.358409	0.362325	0.326716	0.342792	0.208156	0.350594	0.347183	HSC_only
1810022K09Rik	0.505093	0.593716	0.407892	0.66977	0.470304	0.470228	0.643157	0.470426	0.581017	0.41608	0.481113	0.499127	0.63417	0.44672	0.422477	0	0.586485	0.433275	0.49947	0.377516	0.500869	0.898713	0.539654	0.650126	0.51205	HSC_only
2010107E04Rik	0.83453	1.12361	0.680327	0.915227	0.778741	0.82035	1.17484	0.802938	0.962737	0.795334	0.888898	1.06201	1.17528	1.26373	0.728269	0	1.029	0.697763	0.880517	0.712863	1.07406	1.85612	0.926285	1.15372	0.974234	HSC_only
2310035C23Rik	0.191695	0.2249	0.272788	0.16727	0.198034	0.19732	0.186932	0.292092	0.1668	0.163608	0.245615	0.247883	0.231513	0.288969	0.189176	0	0.252914	0.141066	0.179637	0.177395	0.19145	0	0.183688	0.255617	0.198196	HSC_only
2410015M20Rik	0.956359	0.947321	1.03008	1.08254	0.913559	0.870731	1.17771	0.86767	1.0485	0.898071	0.816636	0.939387	0.992622	0.75899	0.872881	0	1.0953	0.909009	1.05273	0.922185	0.915347	1.10704	0.763343	0.931396	0.847651	HSC_only
2610507B11Rik	0.21433	0.280525	0.268195	0.262677	0.212568	0.209336	0.311628	0.254573	0.2538	0.195812	0.32779	0.347687	0.328122	0.212514	0.217997	0	0.350419	0.21434	0.2607	0.209243	0.291871	0	0.305564	0.303634	0.236534	HSC_only
2610524H06Rik	0.21124	0.42601	0.233161	0.265294	0.192717	0.253271	0.479013	0.202141	0.319519	0.228294	0.187399	0.220289	0.30646	0.183929	0.230684	0	0.35955	0.218435	0.31523	0.272951	0.250806	0.208001	0.128158	0.290246	0.255152	HSC_only
2700062C07Rik	0.0972266	0.109542	0.122439	0.13406	0.113179	0.116869	0.158513	0.184928	0.121473	0.12442	0.102705	0.149598	0.118095	0.106702	0.111288	0	0.269703	0.101172	0.121063	0.121095	0.143214	0	0.100281	0.135671	0.139747	HSC_only
4930503L19Rik	0.0630997	0.176743	0.144502	0.0696092	0.0698612	0.0897654	0.158914	0.128636	0.0881128	0.0850811	0.192976	0.110602	0.130006	0.0716616	0.0854247	0	0.180408	0.16667	0.0754767	0.0871674	0.0522032	0.342792	0.0768319	0.0679443	0.09903	HSC_only
4930519L02Rik	0.0372046	0.147918	0	0.0715504	0.01762	0.0472694	0.0868411	0	0.0836658	0.0240978	0.0154886	0.0263676	0.058954	0	0.0402366	0	0.0842	0.0292313	0.0692406	0.0211158	0.0287442	0.354456	0.0441458	0.0607827	0.0422484	HSC_only
4931406P16Rik	0.162253	0.177543	0.185721	0.136453	0.187272	0.164721	0.166054	0.195714	0.150544	0.147577	0.291177	0.270205	0.237449	0.209117	0.179053	0.953743	0.273187	0.195465	0.162851	0.161469	0.245286	0.208001	0.212055	0.202982	0.196619	HSC_only
4931428F04Rik	0.0350346	0.0136847	0	0.0398569	0.0306168	0.0383318	0.048778	0.0428109	0.0460193	0.0443351	0.0210891	0.0253403	0.0121197	0.0347822	0.0461378	0	0.0119323	0.0367648	0.050941	0.0393268	0.0494701	0.208001	0.0378769	0.0475262	0.0440101	HSC_only
4932438A13Rik	0.289301	0.211194	0.460379	0.25387	0.287818	0.275688	0.341137	0.311363	0.245979	0.258375	0.401035	0.402611	0.387891	0.429955	0.291131	0	0.30575	0.246354	0.246711	0.267872	0.42631	0.342792	0.348434	0.318778	0.32303	HSC_only
5930430L01Rik	0.0301201	0.02174	0	0.0398593	0.0701818	0.0452775	0.0345986	0	0.048607	0.0643974	0.0249829	0.0165015	0.0435643	0	0.045197	0	0.0402791	0.0701624	0.0397709	0.0782331	0.0635802	0	0.0124165	0.069066	0.0733117	HSC_only
9030624J02Rik	0.174267	0.181709	0.205451	0.141031	0.137241	0.155683	0.188564	0.116567	0.163357	0.161854	0.250661	0.229068	0.216632	0.116712	0.184624	0	0.142607	0.195679	0.172459	0.165339	0.222485	0	0.181155	0.218864	0.224081	HSC_only
9130008F23Rik	0.087211	0.0572157	0.0407954	0.0808237	0.100942	0.0792632	0.0540156	0.0642585	0.0901363	0.111875	0.215443	0.109472	0.150348	0.188068	0.0860953	0	0.0654594	0.152942	0.0798753	0.105769	0.0676746	0.208001	0.116123	0.120914	0.193794	HSC_only
A430005L14Rik	0.21193	0.329159	0.347134	0.274161	0.21393	0.227063	0.350221	0.263065	0.262673	0.232924	0.192772	0.165511	0.192748	0.07902	0.236196	0	0.346441	0.0996466	0.26972	0.241495	0.173476	0	0.132412	0.225403	0.189795	HSC_only
AC160336.1	0.327158	0.470362	0.46705	0.367735	0.340762	0.368301	0.422623	0.473089	0.350754	0.400351	0.707614	0.654628	0.568359	0.399569	0.312874	0	0.386266	0.24159	0.316455	0.345389	0.441477	0.810381	0.595936	0.617767	0.480491	HSC_only
AU020206	0.215844	0.365899	0.243317	0.226522	0.215445	0.245919	0.338882	0.306835	0.304873	0.245082	0.202912	0.217521	0.251698	0.237085	0.246785	0	0.430235	0.208726	0.27934	0.228134	0.301023	0.467589	0.297585	0.345269	0.286218	HSC_only
Aamdc	0.212614	0.203269	0.167453	0.20915	0.205613	0.228318	0.316952	0.185738	0.271397	0.254947	0.204709	0.181054	0.24837	0.129055	0.233484	0	0.269813	0.217408	0.260877	0.253352	0.236355	0.342792	0.195572	0.235242	0.214131	HSC_only
Aamp	0.793977	0.662937	0.730183	0.850373	0.739942	0.607524	0.708603	0.60369	0.712717	0.621954	0.581582	0.614903	0.6803	0.541734	0.623021	0	0.624469	0.588812	0.741777	0.628584	0.713324	0.550793	0.597695	0.71957	0.655099	HSC_only
Abca5	0.0759109	0.0803098	0.162991	0.051769	0.0644742	0.080058	0.0308682	0.0416437	0.0546369	0.0712885	0.166354	0.0973234	0.080255	0.124468	0.0823849	0	0.0265664	0.0598721	0.0502738	0.0765472	0.107563	0	0.0549671	0.0501397	0.0840184	HSC_only
Abcf1	0.590483	0.681007	0.439786	0.722828	0.472945	0.420292	0.674535	0.433743	0.564701	0.436896	0.479032	0.461283	0.609308	0.351879	0.452686	0.953743	0.607082	0.356224	0.562023	0.436225	0.485989	0.354456	0.46132	0.573314	0.419479	HSC_only
Abhd11	0.257194	0.239651	0.132868	0.353701	0.195234	0.214243	0.26266	0.33376	0.31055	0.186009	0.16796	0.177477	0.205622	0.0290699	0.215966	1.43289	0.19509	0.132768	0.320508	0.213597	0.164547	0.208001	0.207182	0.22644	0.193982	HSC_only
Abhd14a	0.212658	0.218397	0.28133	0.312555	0.241507	0.259014	0.220427	0.220652	0.354598	0.233932	0.197046	0.240653	0.347656	0.270858	0.25142	0	0.220899	0.18621	0.360314	0.253141	0.223644	0.208001	0.228088	0.304436	0.245393	HSC_only
Abhd6	0.059363	0.11949	0.0584098	0.0472452	0.0690814	0.0577038	0.0823922	0.112606	0.0555966	0.0700267	0.033339	0.0317642	0.00598801	0.0375043	0.062314	0	0.0832635	0.0651657	0.0653429	0.0722108	0.0235434	0	0.0644138	0.0567634	0.058455	HSC_only
Abi1	0.174256	0.2144	0.255351	0.17521	0.162343	0.168842	0.176762	0.199736	0.160574	0.148167	0.214993	0.220221	0.243826	0.260747	0.164779	0	0.222171	0.158738	0.178519	0.155515	0.229063	0.550793	0.164017	0.170832	0.203608	HSC_only
Abracl	0.71981	1.11639	0.680748	0.927539	0.707707	0.737756	1.25848	0.641126	0.922508	0.721743	0.74764	0.672329	0.888125	0.506157	0.751913	0	1.2904	0.853863	0.94596	0.694434	0.767563	1.25174	0.737486	0.836809	0.690295	HSC_only
Abtb1	0.08262	0.10704	0.0795952	0.048722	0.0738789	0.102575	0.1351	0.0607967	0.0901651	0.114291	0.080827	0.0497379	0.0837461	0	0.109873	0	0.124711	0.148489	0.103132	0.131829	0.140531	0	0.0478609	0.0661625	0.170865	HSC_only
Acaa2	0.214644	0.255832	0.162312	0.272516	0.217885	0.29038	0.386091	0.333398	0.335863	0.309973	0.226291	0.243573	0.270548	0.335297	0.307672	0.953743	0.371599	0.252937	0.348857	0.315566	0.339308	0.752259	0.317775	0.37155	0.309741	HSC_only
Acadl	0.53941	0.899832	0.827067	0.586301	0.517289	0.54615	0.810666	0.722406	0.559933	0.50114	0.733793	0.441449	0.499244	0.337267	0.556917	0.953743	0.758062	1.02833	0.559919	0.533584	0.729401	0.342792	0.825533	0.585395	0.70755	HSC_only
Acads	0.283188	0.323691	0.288337	0.29351	0.256977	0.314027	0.28863	0.28048	0.361319	0.288715	0.23327	0.236708	0.37102	0.229751	0.307892	1.43289	0.251686	0.267766	0.376178	0.292658	0.256723	0.208001	0.231654	0.344324	0.325014	HSC_only
Acadsb	0.0993761	0.00985657	0.0440821	0.0740053	0.0996493	0.137072	0.0894512	0.153936	0.109723	0.142843	0.207353	0.200475	0.114622	0.158992	0.127957	0.953743	0.100459	0.112055	0.0973428	0.133686	0.168024	0.342792	0.124108	0.147571	0.165312	HSC_only
Acat1	0.564796	0.931369	0.29048	0.619632	0.528822	0.588026	0.935378	0.785795	0.67276	0.581517	0.599042	0.572907	0.624428	0.570548	0.600568	0.953743	0.899054	0.552125	0.662226	0.596197	0.523914	0.90258	0.518489	0.710911	0.60702	HSC_only
Acbd3	0.265377	0.232676	0.346589	0.279571	0.237583	0.222652	0.18392	0.333945	0.212232	0.215385	0.307925	0.303235	0.299827	0.139736	0.228001	0	0.237778	0.265008	0.221713	0.185354	0.214816	0.208001	0.233851	0.283023	0.246881	HSC_only
Acer2	0.0409461	0.0114123	0.0407954	0.0344382	0.0362669	0.0438422	0.0415342	0	0.0424707	0.0481112	0.222421	0.288747	0.140991	0.200384	0.0434108	0	0.0177847	0	0.0372608	0.0425587	0.036378	0	0.0658693	0.0529017	0.0430781	HSC_only
Acot13	0.181087	0.300153	0.0867078	0.182317	0.181519	0.27096	0.389887	0.178852	0.265932	0.251327	0.234779	0.148278	0.213151	0.262528	0.249121	0	0.23699	0.1997	0.287332	0.263117	0.222485	0	0.14097	0.206958	0.267476	HSC_only
Acp1	0.470897	0.623751	0.51879	0.536853	0.435016	0.474612	0.766993	0.450332	0.539641	0.449171	0.503938	0.428293	0.525026	0.431269	0.431522	0	0.79983	0.466471	0.507795	0.444454	0.510325	0.697248	0.401598	0.528507	0.506486	HSC_only
Acp6	0.147345	0.218001	0.163329	0.201023	0.154166	0.179683	0.303259	0.10943	0.215558	0.185264	0.147807	0.134351	0.261016	0.208259	0.177962	0	0.198431	0.260138	0.198901	0.182409	0.147082	0.342792	0.178606	0.197866	0.144971	HSC_only
Acsl4	0.0584178	0.107723	0.0337877	0.0560337	0.0652127	0.071931	0.0815666	0.0957883	0.0797069	0.0609801	0.171896	0.136273	0.136042	0	0.0744533	0	0.0468787	0.0603179	0.0716408	0.0701109	0.122332	0	0.112914	0.111038	0.0641111	HSC_only
Acsl5	0.429535	0.675932	0.414065	0.474707	0.422049	0.354074	0.507285	0.410894	0.452439	0.362234	0.328396	0.449809	0.46715	0.49938	0.365453	0	0.590578	0.404509	0.464409	0.354525	0.297132	0.637604	0.407931	0.513934	0.33809	HSC_only
Actl6a	0.476684	0.880063	0.589283	0.592263	0.41572	0.368652	0.738706	0.442862	0.549855	0.355352	0.383419	0.402659	0.509079	0.305617	0.384213	0.953743	0.806138	0.357346	0.532077	0.341316	0.347251	0.467589	0.362835	0.4183	0.314291	HSC_only
Actr2	0.48689	0.544059	0.362176	0.478555	0.431853	0.446906	0.46339	0.516748	0.459426	0.401	0.609517	0.589684	0.628692	0.58581	0.454163	0.953743	0.680159	0.547598	0.483728	0.387481	0.535291	0.898713	0.531526	0.546834	0.547622	HSC_only
Acy1	0.0560529	0.0417172	0.0311127	0.0798806	0.0404785	0.0378556	0.0368047	0.0336267	0.0658649	0.030843	0.00662177	0.0177038	0.0392562	0.0636925	0.0470766	0	0.0513783	0.0350907	0.0781279	0.0490832	0.0462982	0	0.039095	0.0526611	0.0291161	HSC_only
Ada	0.070815	0.169363	0.0980179	0.106859	0.0659582	0.0705313	0.123086	0.054191	0.0962364	0.0778713	0.0576645	0.037921	0.0836806	0.105279	0.0626618	0.953743	0.137518	0.042213	0.0909015	0.0621395	0.0529063	0	0.0749143	0.0734505	0.0369451	HSC_only
Adck2	0.0370524	0.0705673	0.0431153	0.0390088	0.0550083	0.0503191	0.0797492	0.0125262	0.0533673	0.0562309	0.0845134	0.0974618	0.0939379	0.104475	0.0726128	0	0.0118606	0.0538937	0.0674875	0.0754202	0.0795051	0	0.0619816	0.0858031	0.0717994	HSC_only
Adck5	0.103412	0.104534	0.178186	0.12884	0.0971273	0.101527	0.135025	0.0636786	0.120142	0.0913397	0.0989779	0.0722014	0.143884	0	0.0960617	0	0.0953322	0.0796977	0.114779	0.102633	0.122571	0.208001	0.0752483	0.0966681	0.106578	HSC_only
Adcy6	0.0409603	0.0687812	0	0.0487903	0.0410371	0.0337548	0.0642768	0.0353117	0.0439429	0.0343315	0.0916737	0.0528002	0.0453646	0.0600812	0.0342102	0	0.0452646	0.0266995	0.0445041	0.0425288	0.0325709	0	0.0243213	0.0447529	0.0517444	HSC_only
Adh5	0.692708	0.811743	0.579766	0.789501	0.611783	0.653755	0.877032	0.69503	0.793473	0.614763	0.501021	0.572441	0.765931	0.520969	0.642902	0	0.862544	0.699813	0.818631	0.619531	0.467537	0.208001	0.531072	0.712287	0.622379	HSC_only
Adsl	0.284859	0.39845	0.286892	0.394951	0.267363	0.247889	0.389709	0.185087	0.368271	0.231306	0.22451	0.247677	0.279475	0.226979	0.21807	0	0.467096	0.154787	0.339227	0.228021	0.250503	0.354456	0.226625	0.348084	0.208023	HSC_only
Adssl1	0.140187	0.194926	0.137917	0.154193	0.145912	0.21935	0.17041	0.148766	0.200178	0.196046	0.2324	0.201791	0.214839	0.162306	0.21051	0	0.162427	0.142129	0.201864	0.207801	0.270258	0	0.181349	0.221876	0.206046	HSC_only
Afdn	0.154417	0.163474	0.204361	0.125133	0.126515	0.13473	0.179567	0.219867	0.149712	0.126036	0.184633	0.214453	0.203128	0.322578	0.14355	0	0.127056	0.117423	0.134822	0.115909	0.207061	0.342792	0.151236	0.131988	0.150836	HSC_only
Agpat4	0.182182	0.169656	0.176079	0.13532	0.19432	0.182596	0.192838	0.182915	0.167274	0.214444	0.296345	0.262889	0.235893	0.328506	0.191624	0.953743	0.191484	0.308324	0.162181	0.241473	0.187306	0.342792	0.403839	0.256009	0.307789	HSC_only
Ahcyl1	0.364129	0.44414	0.382698	0.364469	0.370992	0.331081	0.370718	0.338475	0.334494	0.342299	0.500911	0.423391	0.414591	0.287987	0.337624	0	0.387655	0.343874	0.367736	0.331367	0.379361	0.208001	0.350251	0.409835	0.402412	HSC_only
Ahnak	0.159975	0.116636	0.0391254	0.068881	0.166956	0.173648	0.0772046	0.1821	0.0610587	0.172089	0.330765	0.205661	0.107333	0.502091	0.199016	0	0.0395481	0.217227	0.0753594	0.176323	0.249478	0	0.226062	0.13942	0.167173	HSC_only
Ahsa1	0.629687	0.875932	0.572068	0.780295	0.55722	0.526011	0.848633	0.58548	0.701975	0.539502	0.548592	0.576624	0.741721	0.431449	0.558596	1.43289	0.780609	0.522883	0.710021	0.551742	0.526688	0.559788	0.4998	0.712366	0.578297	HSC_only
Aifm1	0.179559	0.323014	0.196862	0.225049	0.166817	0.160654	0.284179	0.299596	0.224099	0.16432	0.118453	0.167164	0.228524	0.222936	0.154789	0	0.26881	0.177208	0.206536	0.169088	0.220111	0	0.179353	0.220113	0.224525	HSC_only
Ak2	0.668239	1.18899	0.577307	0.910964	0.56861	0.594057	1.09871	0.689142	0.810836	0.530114	0.5394	0.599862	0.827056	0.326231	0.634652	1.75548	1.10651	0.544254	0.844134	0.547738	0.608902	1.67069	0.576214	0.763231	0.454627	HSC_only
Akap11	0.177427	0.187475	0.0749789	0.170654	0.155639	0.15781	0.12329	0.163679	0.156991	0.128408	0.2518	0.201412	0.228247	0.137858	0.163829	0	0.166962	0.22571	0.13457	0.143803	0.201265	0	0.108933	0.191361	0.203838	HSC_only
Akap7	0.113973	0.100039	0.134822	0.125768	0.132748	0.164575	0.210702	0.150296	0.160273	0.168682	0.309905	0.196132	0.175636	0.304495	0.183073	0	0.109836	0.137624	0.14536	0.179629	0.212793	0	0.177074	0.245536	0.197728	HSC_only
Akap8l	0.460533	0.258575	0.208812	0.379073	0.402598	0.396487	0.266041	0.283674	0.320164	0.37785	0.523567	0.404016	0.288357	0.53428	0.420621	0	0.205343	0.368566	0.31074	0.389982	0.469469	0.550793	0.27786	0.378353	0.422093	HSC_only
Akip1	0.10465	0.315632	0.0789434	0.125514	0.0937448	0.112877	0.219441	0.147079	0.161584	0.116934	0.0479776	0.0829648	0.132802	0.169677	0.131848	0	0.370014	0.0747108	0.159203	0.116528	0.0757911	0.208001	0.0833762	0.14817	0.114449	HSC_only
Akirin1	0.210169	0.23256	0.151988	0.211407	0.231173	0.153875	0.176383	0.228376	0.181513	0.14707	0.261101	0.259804	0.249437	0.170792	0.17501	0	0.165806	0.244096	0.17197	0.168696	0.176459	0.208001	0.212285	0.169132	0.156522	HSC_only
Akr1b3	0.61656	0.664135	0.70124	0.750058	0.593645	0.659465	0.691594	0.800318	0.77807	0.627448	0.653662	0.673704	0.620413	0.470096	0.628394	0.953743	0.697936	0.556504	0.769999	0.614208	0.659777	0.544258	0.628631	0.714483	0.568554	HSC_only
Akr1e1	0.219234	0.274899	0.227261	0.204766	0.183895	0.239633	0.252806	0.278059	0.279009	0.254509	0.225991	0.216592	0.21718	0.211503	0.233765	0	0.204929	0.136071	0.257802	0.223246	0.236986	0	0.239247	0.258798	0.171642	HSC_only
Akr7a5	0.197015	0.210452	0.137788	0.238889	0.206381	0.218102	0.230144	0.134937	0.265007	0.227288	0.180658	0.181449	0.220169	0.0715954	0.216153	0.953743	0.265749	0.175788	0.296106	0.216049	0.22872	0	0.178559	0.209012	0.232445	HSC_only
Akt2	0.268854	0.401311	0.314086	0.331027	0.271124	0.236882	0.206443	0.252593	0.228834	0.208378	0.301454	0.292008	0.310179	0.401768	0.225341	0	0.308561	0.115131	0.232677	0.236712	0.313303	0.342792	0.343061	0.307068	0.246098	HSC_only
Alad	0.197428	0.353036	0.163824	0.269683	0.176684	0.175474	0.376677	0.169682	0.271001	0.16977	0.114776	0.125479	0.182961	0.147248	0.195693	0	0.35565	0.20549	0.268236	0.167641	0.162711	0.810381	0.144855	0.233664	0.125299	HSC_only
Alcam	0.234251	0.153138	0.338258	0.156128	0.228618	0.260842	0.225997	0.34437	0.204479	0.281032	0.382497	0.317064	0.268601	0.514772	0.28169	1.43289	0.237655	0.218406	0.206958	0.27821	0.370248	0.752259	0.308984	0.242859	0.328431	HSC_only
Aldh18a1	0.130186	0.28079	0.23104	0.239525	0.108344	0.0988348	0.273945	0.0530747	0.165085	0.0998134	0.0453026	0.129378	0.197723	0.060662	0.0968237	0	0.208687	0.146088	0.16261	0.105563	0.093566	0.208001	0.0918538	0.18954	0.0777278	HSC_only
Aldh1a1	0.199487	0.340375	0.308137	0.23458	0.175952	0.228601	0.372343	0.173995	0.271068	0.184368	0.220637	0.199649	0.223585	0.0820354	0.229312	0	0.428509	0.333109	0.295217	0.200839	0.268325	1.10405	0.28921	0.268501	0.192812	HSC_only
Aldh3a2	0.0621251	0.0792165	0.102634	0.0482286	0.0761214	0.0667621	0.0473659	0.105947	0.0630666	0.0716038	0.0672961	0.0835895	0.0455409	0.048273	0.0681645	0	0.113312	0.0673148	0.0677707	0.0808469	0.0843312	0	0.0699008	0.0688609	0.0690992	HSC_only
Aldh6a1	0.0765996	0.0789015	0.0485312	0.0543432	0.09933	0.0752531	0.0639578	0.0669996	0.0778637	0.0990139	0.103883	0.135605	0.100828	0.172541	0.0854181	0	0.0866082	0.103127	0.0932182	0.0999094	0.0745639	0.208001	0.0751615	0.0767042	0.117479	HSC_only
Alg8	0.0586534	0.124003	0.0311127	0.101997	0.0428211	0.0389357	0.155937	0.0340262	0.0780389	0.0318918	0.0443039	0.0295667	0.0732629	0	0.0459042	0	0.179622	0.0479326	0.0723421	0.0417312	0.024703	0	0.0424485	0.0765168	0.0569814	HSC_only
Alkbh2	0.062925	0.105906	0	0.0846385	0.0551448	0.0536352	0.0649374	0.0847947	0.0895983	0.0408823	0.0265175	0.0506553	0.0493819	0.0721121	0.0442838	0	0.0691835	0.0289291	0.075686	0.0477418	0.0600334	0.208001	0.0378712	0.0606171	0.0364247	HSC_only
Amacr	0.0479936	0.0720847	0	0.0555277	0.0529517	0.0650359	0.0883231	0.0341078	0.0660903	0.0765722	0.0501826	0.0299894	0.0523341	0	0.066475	0	0.0623516	0.0447802	0.0630056	0.0708005	0.0938419	0	0.0590568	0.0890326	0.0554921	HSC_only
Ambra1	0.0701311	0.062485	0	0.0750509	0.0721338	0.0659084	0.0901368	0.104175	0.0632658	0.058815	0.0757989	0.104912	0.0520577	0.0309234	0.0581617	0	0.0312028	0.0591507	0.0618943	0.054342	0.0594243	0	0.0823674	0.0763061	0.0679154	HSC_only
Amdhd2	0.0630003	0.142638	0	0.0677135	0.0569941	0.0989111	0.151096	0.116098	0.121758	0.0998582	0.0750326	0.0809517	0.0637476	0	0.0978133	0	0.172461	0.0715486	0.107202	0.105338	0.0520531	0	0.07457	0.116511	0.0556266	HSC_only
Amn1	0.185639	0.106585	0.418013	0.150383	0.205488	0.198733	0.150519	0.296864	0.197537	0.248877	0.281008	0.297909	0.249946	0.44196	0.206033	0	0.145878	0.236631	0.187448	0.257407	0.330309	0.550793	0.255003	0.264796	0.370409	HSC_only
Ampd2	0.311994	0.428968	0.515191	0.368229	0.305531	0.303902	0.327666	0.300876	0.316153	0.292314	0.290957	0.242148	0.306687	0.217257	0.270968	0.953743	0.207552	0.280512	0.319882	0.271519	0.304377	0.810381	0.253554	0.349686	0.306835	HSC_only
Ankrd12	0.536569	0.492762	0.698401	0.446547	0.496085	0.510706	0.363516	0.392799	0.434464	0.54006	0.584349	0.620934	0.573549	0.705385	0.511274	0.953743	0.406262	0.565825	0.476341	0.545879	0.571264	0.697248	0.355216	0.563455	0.501527	HSC_only
Ankrd13b	0.0410353	0.0224709	0	0.0442979	0.0401497	0.0359102	0.0235795	0.0399585	0.0503758	0.0304425	0.016672	0.0243633	0.0139253	0	0.0498027	0	0.0242163	0.0197177	0.0510954	0.0379262	0.0407057	0	0.03483	0.029602	0.0149263	HSC_only
Ankzf1	0.0868112	0.0654348	0.164035	0.0919129	0.100794	0.0907753	0.0871634	0.06645	0.0898147	0.10046	0.0644036	0.0613736	0.0905063	0.0290699	0.100736	0	0.105663	0.0924259	0.102007	0.0981354	0.116493	0	0.0646187	0.0983491	0.117338	HSC_only
Anp32b	1.80085	2.49869	1.60203	2.14262	1.67088	1.53524	2.44419	1.58435	1.9536	1.47832	1.45235	1.67513	1.88285	1.4329	1.55418	1.99899	2.38633	1.50533	1.95213	1.50291	1.48712	1.94427	1.34483	1.76918	1.41337	HSC_only
Anxa1	0.269855	0.405904	0.180457	0.230834	0.256242	0.371911	0.449207	0.241526	0.346749	0.358106	0.379973	0.277846	0.302209	0.431235	0.383165	0	0.395292	0.346076	0.357172	0.380965	0.42326	0.208001	0.374807	0.40586	0.391193	HSC_only
Anxa6	0.211015	0.178743	0.195267	0.172164	0.259069	0.205117	0.15236	0.27697	0.182451	0.25278	0.339054	0.281257	0.233337	0.312333	0.216046	1.43289	0.0900419	0.356603	0.175197	0.254225	0.143043	0	0.270147	0.16186	0.247367	HSC_only
Anxa7	0.598692	0.511162	0.471291	0.655849	0.628376	0.503292	0.304193	0.542026	0.454111	0.522364	0.525708	0.626812	0.560717	0.694004	0.50658	0	0.373071	0.442879	0.493306	0.512209	0.587441	1.04192	0.779147	0.532283	0.609073	HSC_only
Ap1b1	0.130807	0.0776982	0.114508	0.111916	0.116623	0.134241	0.204394	0.162101	0.139803	0.125551	0.223042	0.190845	0.227669	0.198551	0.0973125	0	0.115529	0.174795	0.1348	0.124954	0.183058	0	0.126002	0.166626	0.1403	HSC_only
Ap1s1	0.342975	0.55345	0.324345	0.421953	0.339166	0.333644	0.48303	0.21429	0.425147	0.323393	0.340135	0.343147	0.440638	0.271415	0.325117	0	0.502488	0.349256	0.419857	0.299866	0.28164	0.342792	0.250835	0.40164	0.27541	HSC_only
Ap2s1	0.664743	1.03962	0.455335	0.741559	0.653066	0.594448	0.954909	0.554989	0.691526	0.605479	0.483319	0.506431	0.657029	0.69381	0.594297	0.953743	0.895291	0.590036	0.707534	0.589593	0.663171	0.559788	0.480134	0.586621	0.505174	HSC_only
Ap3b1	0.445155	0.401568	0.273347	0.381315	0.443444	0.428012	0.421142	0.379228	0.398722	0.421003	0.597815	0.508396	0.545508	0.480219	0.407472	0.953743	0.491144	0.243795	0.396659	0.424167	0.422308	0.550793	0.484241	0.451363	0.502566	HSC_only
Ap5s1	0.0240859	0.0645765	0.0415605	0.0373853	0.0308392	0.0483354	0.0680829	0.0212974	0.0484137	0.0453696	0.0327555	0.0256695	0.0209875	0	0.0441512	0	0.0612267	0.0410295	0.0479978	0.0492501	0.0404573	0	0.0162196	0.0371133	0.0368988	HSC_only
Apbb1	0.0516978	0.0138816	0.0376498	0.0300017	0.0429778	0.0803372	0.0431764	0.0469129	0.0591733	0.0749599	0.0614334	0.0322518	0.0247314	0	0.0809514	0	0.0156859	0.0772454	0.0626247	0.097902	0.0949284	0	0.0512361	0.0678735	0.122293	HSC_only
Apeh	0.129692	0.14911	0.344424	0.184638	0.17081	0.169818	0.187024	0.17521	0.178702	0.149812	0.144864	0.123979	0.150293	0.206386	0.161102	0	0.236554	0.110605	0.19016	0.164245	0.197415	0	0.119489	0.219268	0.219176	HSC_only
Apoo	0.131171	0.154909	0.0935977	0.159992	0.134751	0.107032	0.283881	0.0946105	0.131666	0.0918779	0.0768827	0.0946466	0.158309	0.104588	0.101895	0	0.220944	0.0760644	0.154973	0.109707	0.0847711	0.208001	0.100234	0.112555	0.111425	HSC_only
Arcn1	0.470909	0.433788	0.358338	0.499825	0.402534	0.374364	0.362142	0.325698	0.327458	0.284907	0.496575	0.424128	0.486829	0.405803	0.379272	0	0.478985	0.450102	0.334186	0.289832	0.388868	0.697248	0.351226	0.393758	0.351438	HSC_only
Arf2	0.167678	0.191179	0.0697476	0.182248	0.151093	0.0969512	0.199275	0.102603	0.106945	0.0900245	0.172503	0.17848	0.137164	0.137976	0.0998955	0.953743	0.219362	0.0983238	0.104705	0.0968464	0.078135	0.550793	0.156761	0.123197	0.115206	HSC_only
Arfgef1	0.414377	0.354678	0.513064	0.445967	0.401229	0.362451	0.295204	0.502469	0.334315	0.342236	0.527508	0.465774	0.402071	0.47304	0.356225	0	0.362837	0.319515	0.37453	0.333283	0.413571	0	0.439636	0.507441	0.40553	HSC_only
Arhgap5	0.260888	0.21308	0.175442	0.273823	0.230548	0.216098	0.234306	0.236421	0.259978	0.230325	0.342963	0.32648	0.315376	0.21455	0.249775	0.953743	0.389216	0.16445	0.245018	0.227246	0.298604	0.208001	0.203209	0.327746	0.277438	HSC_only
Arhgap9	0.211448	0.179743	0.157857	0.192066	0.172773	0.20593	0.167017	0.196141	0.21936	0.206482	0.11692	0.162257	0.187142	0.19398	0.215077	0	0.136959	0.266421	0.221627	0.215692	0.172027	0.697248	0.104989	0.19533	0.225219	HSC_only
Arhgef1	0.31121	0.433754	0.243588	0.313351	0.329895	0.343848	0.467885	0.286519	0.358179	0.372508	0.476082	0.523567	0.433492	0.517535	0.326776	0	0.336056	0.273943	0.321769	0.369637	0.517881	0.752259	0.306201	0.455735	0.563134	HSC_only
Arhgef12	0.238418	0.306827	0.045235	0.212106	0.244028	0.257065	0.210039	0.268883	0.203487	0.240177	0.36392	0.339557	0.243837	0.151585	0.258611	0	0.196946	0.260115	0.218235	0.265774	0.328303	0.208001	0.207866	0.295762	0.311167	HSC_only
Arhgef2	0.488993	0.681635	0.452467	0.468259	0.444462	0.461035	0.495755	0.44697	0.51446	0.476814	0.516934	0.358926	0.566727	0.231247	0.486901	0.953743	0.504232	0.41267	0.519225	0.494332	0.640765	0.208001	0.430051	0.634948	0.509132	HSC_only
Arid2	0.236608	0.300027	0.233738	0.237844	0.22565	0.256389	0.349094	0.243959	0.241358	0.217705	0.522422	0.315181	0.278644	0.473071	0.234953	0	0.225101	0.2996	0.232834	0.224224	0.41249	0.354456	0.361729	0.33538	0.283084	HSC_only
Arid4a	0.458155	0.506403	0.243084	0.324963	0.381312	0.455108	0.456203	0.462674	0.38527	0.450214	0.744231	0.41409	0.501899	0.486997	0.49341	0	0.413573	0.59574	0.397424	0.471062	0.65997	1.00666	0.514602	0.483706	0.593143	HSC_only
Arid4b	0.660825	0.601811	0.442531	0.533619	0.596249	0.568186	0.52472	0.5794	0.487368	0.50293	0.72228	0.554962	0.623165	0.75355	0.573003	0	0.542372	0.415326	0.501708	0.54378	0.633837	0.342792	0.669121	0.57143	0.606485	HSC_only
Arih1	0.389491	0.366619	0.18873	0.380308	0.330637	0.326962	0.329676	0.294829	0.319589	0.281267	0.493199	0.405924	0.34718	0.574418	0.334238	0	0.388938	0.309062	0.317847	0.275422	0.377663	0.208001	0.446152	0.329721	0.274848	HSC_only
Arl1	0.654053	0.753766	0.399975	0.767634	0.680397	0.562141	0.699811	0.555868	0.635903	0.605503	0.713618	0.754648	0.762836	0.696828	0.569677	0.953743	0.654085	0.584615	0.646165	0.590638	0.667426	0.550793	0.707385	0.643184	0.645581	HSC_only
Arl15	0.0515481	0.032278	0.0337877	0.0548362	0.0551127	0.0596083	0.0377368	0.0766534	0.0616794	0.0620579	0.110764	0.0935219	0.0934715	0.0849973	0.0681137	0	0.0371154	0.0689142	0.0628715	0.0672488	0.081059	0	0.0665936	0.0900594	0.0866304	HSC_only
Arl3	0.286231	0.35256	0.217613	0.323068	0.296361	0.313764	0.372175	0.336813	0.342241	0.334567	0.291091	0.29089	0.32343	0.175987	0.303546	0	0.319637	0.279512	0.337274	0.277226	0.292659	0	0.295826	0.293997	0.258119	HSC_only
Arl4a	0.404533	0.369187	0.442609	0.367648	0.310658	0.371998	0.368995	0.57842	0.321553	0.33843	0.584376	0.62689	0.424894	0.712942	0.43453	0	0.4568	0.315173	0.386304	0.361292	0.408948	0.544258	1.03312	0.437217	0.38182	HSC_only
Arl4c	0.105707	0.104001	0.0391254	0.0586782	0.049514	0.155717	0.151782	0.0794242	0.0779166	0.0611753	0.0911524	0.0470556	0.0671064	0.0665176	0.168125	0	0.187298	0.0504137	0.0982142	0.0520105	0.0848913	0.342792	0.0444446	0.0711475	0.0505501	HSC_only
Arl6ip4	0.366973	0.5316	0.401725	0.476707	0.387163	0.367171	0.543904	0.271711	0.428817	0.358394	0.291387	0.323163	0.382242	0.28807	0.363792	0	0.548043	0.308075	0.419281	0.350536	0.263972	0.354456	0.290159	0.421895	0.415619	HSC_only
Armc5	0.0837541	0.111771	0.12326	0.070413	0.0729307	0.0706971	0.0741015	0.137403	0.068155	0.0674652	0.150947	0.12728	0.103521	0.144266	0.0758509	0	0.122743	0.0740317	0.0890898	0.0640049	0.0585545	0	0.0694632	0.108934	0.105208	HSC_only
Arrb1	0.117474	0.180851	0.0527829	0.110319	0.134229	0.168106	0.164749	0.0805809	0.14198	0.182724	0.151955	0.106958	0.0894201	0.0978197	0.162195	0	0.204937	0.0895276	0.142788	0.183958	0.130256	0	0.116248	0.177474	0.19287	HSC_only
Art4	0.194627	0.208972	0.0813785	0.176495	0.202545	0.335263	0.260021	0.19162	0.301506	0.371013	0.290869	0.177402	0.217212	0.10844	0.384234	0	0.22887	0.197774	0.361119	0.431245	0.384048	0.342792	0.130636	0.325854	0.398996	HSC_only
As3mt	0.339281	0.358542	0.253266	0.376839	0.306322	0.347186	0.347591	0.348521	0.352855	0.334206	0.244218	0.29501	0.295019	0.141586	0.373417	0	0.39201	0.329589	0.394333	0.378291	0.383042	0.752259	0.269615	0.355764	0.325628	HSC_only
Asb8	0.147988	0.178099	0.384563	0.178454	0.16663	0.164149	0.149044	0.158205	0.161742	0.157936	0.121555	0.112236	0.136136	0.0977551	0.151853	0	0.178255	0.132366	0.175984	0.174297	0.162467	0.208001	0.127617	0.190238	0.146186	HSC_only
Asf1a	0.304246	0.570001	0.248468	0.353809	0.295418	0.261815	0.539722	0.191735	0.316191	0.256836	0.255788	0.233057	0.304943	0.134033	0.266222	0	0.451766	0.245289	0.327563	0.266797	0.24213	0.697248	0.221323	0.323384	0.317052	HSC_only
Asna1	0.138101	0.178233	0.089317	0.172437	0.140456	0.123273	0.242057	0.205105	0.166895	0.121161	0.113415	0.10659	0.126048	0.0655368	0.120234	0	0.270872	0.135702	0.161112	0.111765	0.134965	0.208001	0.123699	0.14673	0.0781443	HSC_only
Aspscr1	0.214023	0.33553	0.128161	0.26012	0.221249	0.221989	0.408667	0.0824501	0.264903	0.206552	0.130852	0.185581	0.251863	0.159164	0.249592	1.43289	0.29827	0.224107	0.283221	0.223103	0.196835	0.208001	0.202838	0.300387	0.230211	HSC_only
Asrgl1	0.199593	0.445798	0.324247	0.219498	0.19397	0.230456	0.364431	0.0980872	0.261648	0.205392	0.221572	0.147921	0.172149	0.140139	0.211301	0	0.339588	0.281142	0.247883	0.20807	0.240901	0.342792	0.161381	0.254375	0.158952	HSC_only
Atad1	0.257733	0.23952	0.258248	0.287576	0.223822	0.218553	0.378325	0.262099	0.24834	0.220208	0.298369	0.325543	0.386307	0.150332	0.205788	0	0.31188	0.264895	0.246554	0.214463	0.352673	0	0.302247	0.304158	0.284983	HSC_only
Atad2	0.135824	0.934617	0.266009	0.217446	0.1189	0.151889	0.851276	0.117775	0.248577	0.120122	0.216001	0.12122	0.200825	0.0290699	0.151279	0	1.01851	0.102188	0.220317	0.141667	0.202432	0.354456	0.110606	0.181175	0.177829	HSC_only
Atad5	0.0348119	0.427539	0.0311127	0.053518	0.0486264	0.0407628	0.43749	0.0477343	0.0998924	0.0479604	0.040927	0.0212701	0.0190218	0	0.0451756	0	0.346993	0.0826078	0.0832723	0.0453587	0.0477128	0.208001	0.0472555	0.0601565	0.0723367	HSC_only
Ate1	0.205672	0.249954	0.182883	0.190464	0.203306	0.177107	0.124392	0.232101	0.17884	0.201728	0.310719	0.220651	0.258117	0.20205	0.201309	0	0.147139	0.201582	0.167421	0.197085	0.286524	0.550793	0.194533	0.197846	0.224348	HSC_only
Atf3	0.283246	0.0512457	0.392283	0.124071	0.0439335	0.276216	0.0870141	0.114149	0.0972795	0.0421564	0.118205	0.0422511	0.0613449	0.0670721	0.357761	0	0.302318	0.327919	0.120103	0.0406269	0.412374	0	1.29478	0.159817	0.0577892	HSC_only
Atg5	0.274367	0.261267	0.187239	0.273922	0.215722	0.226891	0.313101	0.236638	0.23725	0.223709	0.207343	0.17327	0.21675	0.232331	0.223353	0	0.343873	0.26216	0.258879	0.213773	0.283135	0.342792	0.171485	0.230654	0.271234	HSC_only
Atic	0.537457	0.588589	0.447975	0.717777	0.452933	0.443765	0.618548	0.462212	0.661692	0.402556	0.351768	0.462089	0.655723	0.354619	0.442677	0.953743	0.57848	0.335927	0.643209	0.406179	0.510474	0.637604	0.379285	0.628672	0.379289	HSC_only
Atl2	0.0597562	0.123427	0.166697	0.0732626	0.0666116	0.0932032	0.107338	0.100434	0.0892705	0.0688843	0.128682	0.14377	0.133057	0.133017	0.104173	0	0.129529	0.0884742	0.0798124	0.0743114	0.103262	0.342792	0.123938	0.113218	0.0804986	HSC_only
Atp13a3	0.261462	0.268639	0.299936	0.219896	0.202653	0.292402	0.200337	0.177204	0.215388	0.190404	0.334226	0.296845	0.299314	0.198094	0.300956	0	0.175396	0.21294	0.215942	0.183502	0.275117	0.208001	0.177651	0.224364	0.167104	HSC_only
Atp5b	1.64007	2.01316	1.63652	1.80942	1.56687	1.58017	2.04264	1.50038	1.82938	1.51281	1.50255	1.56847	1.83435	1.39964	1.58636	1.75548	2.1173	1.50679	1.79781	1.48887	1.36575	1.74782	1.38213	1.64996	1.35155	HSC_only
Atp5c1	1.30298	1.67592	1.14049	1.35112	1.24465	1.32568	1.6757	1.26175	1.43011	1.30671	1.27811	1.35638	1.42396	1.17986	1.35281	1.99899	1.63572	1.1969	1.42053	1.30978	1.32967	1.04772	1.10846	1.31332	1.33941	HSC_only
Atp5g1	1.27075	1.35527	1.01212	1.57372	1.11453	1.01912	1.49133	1.00663	1.4285	0.984641	0.853823	1.10237	1.32112	0.763248	1.00555	1.99899	1.38448	0.975069	1.4057	0.935868	0.897892	1.24918	0.892063	1.20165	0.911054	HSC_only
Atp5g2	1.96762	2.22416	1.95733	2.01439	1.96148	1.94932	2.36098	2.00517	2.09564	1.97774	1.87806	1.91863	1.97633	1.97777	1.98717	1.43289	2.31323	2.00888	2.0821	1.97909	1.87005	1.8	1.71492	1.9425	1.84901	HSC_only
Atp5j2	1.17982	1.40197	1.3946	1.29375	1.11238	1.06761	1.43857	1.08809	1.29074	1.06668	1.05121	1.15003	1.3684	0.960833	1.03599	0.953743	1.42812	1.12039	1.19979	1.02294	1.11382	1.45171	1.10729	1.34156	1.16034	HSC_only
Atp6ap1	0.258942	0.193796	0.229513	0.293082	0.270895	0.257608	0.241573	0.334947	0.271994	0.251543	0.329613	0.37301	0.319605	0.337508	0.271165	0	0.262733	0.243634	0.278511	0.259848	0.391326	0	0.268863	0.320092	0.298201	HSC_only
Atp6v0e	0.90492	0.893351	0.912217	0.932572	0.957654	0.874332	0.980491	0.786587	0.939587	0.925486	0.867439	0.843192	0.925992	0.881601	0.922215	1.99899	0.954884	1.066	0.989133	0.957318	1.00773	0.354456	0.764618	0.879587	0.913462	HSC_only
Atp6v1a	0.230207	0.29853	0.358231	0.247725	0.270474	0.288792	0.360191	0.299973	0.262987	0.24995	0.436691	0.386693	0.325794	0.461151	0.277518	0	0.248491	0.307379	0.285046	0.282566	0.307811	0.544258	0.374715	0.336379	0.369449	HSC_only
Atp6v1h	0.241566	0.335271	0.240063	0.23763	0.227798	0.235425	0.150971	0.117815	0.244101	0.204006	0.368335	0.2931	0.320741	0.300733	0.2637	0.953743	0.176712	0.302201	0.248177	0.231293	0.202333	0.208001	0.212015	0.26283	0.259827	HSC_only
Atpif1	1.28518	1.73311	1.17221	1.41915	1.23036	1.40484	1.89698	1.24076	1.60941	1.38193	1.35063	1.25043	1.461	1.10293	1.31208	0.953743	1.82046	1.29046	1.5418	1.35332	1.33493	1.66386	1.17078	1.48578	1.33186	HSC_only
Auh	0.215524	0.208079	0.187074	0.180599	0.201203	0.229896	0.313018	0.206885	0.208448	0.223862	0.216364	0.135905	0.179539	0	0.235776	0	0.231372	0.201877	0.211206	0.236615	0.291858	0.342792	0.165942	0.257889	0.226418	HSC_only
Aurkaip1	0.631966	0.980321	0.73218	0.728864	0.635408	0.584246	0.860518	0.646224	0.698353	0.628187	0.548149	0.568715	0.656102	0.487545	0.588825	0	0.802604	0.626993	0.702917	0.626964	0.561055	1.15505	0.523041	0.577085	0.605446	HSC_only
Auts2	0.11841	0.157708	0.0425184	0.0736552	0.110955	0.112544	0.206745	0.0987396	0.107289	0.105337	0.182776	0.174532	0.186274	0.0914736	0.107157	0	0.143279	0.0922891	0.0958281	0.0991222	0.115418	0.342792	0.119505	0.15227	0.106157	HSC_only
Aven	0.283068	0.235989	0.287074	0.357342	0.263555	0.256393	0.311993	0.283911	0.322075	0.240852	0.184244	0.273655	0.333675	0.156467	0.270188	0.953743	0.332202	0.128084	0.318366	0.242915	0.177254	0	0.328072	0.322559	0.250483	HSC_only
Axl	0.051183	0.0593964	0.0767752	0.0380017	0.0714503	0.0531608	0.0133129	0.0725861	0.0471467	0.0507764	0.107199	0.0866116	0.0480815	0.0304251	0.0548013	0	0.0294421	0.0711698	0.0479131	0.0548055	0.0309221	0	0.106149	0.0694094	0.0674203	HSC_only
B3gat3	0.233791	0.275729	0.160468	0.224282	0.24939	0.212441	0.275135	0.240318	0.240298	0.234332	0.177002	0.204677	0.167474	0.176595	0.232188	0	0.329702	0.232336	0.223469	0.245072	0.184036	0.342792	0.145131	0.226357	0.229952	HSC_only
B3gnt8	0.0538824	0.0673746	0.0753821	0.0411175	0.0892067	0.0660974	0.0761505	0.0925621	0.0650878	0.0987167	0.124123	0.148017	0.0793126	0.0659174	0.0706418	0	0.0967546	0.0629057	0.0649121	0.102461	0.0674722	0	0.0193015	0.048655	0.0862311	HSC_only
B4galt1	0.118099	0.113516	0.118769	0.105221	0.111467	0.126187	0.098482	0.0791477	0.108409	0.111347	0.206244	0.203901	0.138528	0.188266	0.120604	0	0.0817011	0.0992957	0.104853	0.120004	0.155045	0.208001	0.176485	0.152831	0.148413	HSC_only
B4gat1	0.071919	0.0282844	0.120803	0.0647545	0.0869802	0.0788638	0.051569	0.0556179	0.102477	0.0950105	0.0840609	0.061994	0.0254573	0.0309234	0.0832023	0.953743	0.0835364	0.099329	0.0846507	0.0924559	0.086687	0	0.0318566	0.091687	0.0837652	HSC_only
BC002059	0.0629404	0.0374076	0.118665	0.0569447	0.0503902	0.045904	0.0415501	0.0815196	0.061313	0.0478645	0.0422898	0.0351831	0.0442092	0.0740231	0.0487688	0	0	0.0637329	0.061768	0.0702082	0.0516165	0.208001	0.0442963	0.102263	0.0740312	HSC_only
BC005537	0.514935	0.59404	0.81313	0.465346	0.46255	0.460039	0.470859	0.474693	0.418085	0.412741	0.5926	0.525514	0.512651	0.479004	0.49122	0	0.529158	0.566603	0.443265	0.428121	0.515706	0.467589	0.627702	0.476962	0.543178	HSC_only
BC029722	0.249701	0.216081	0.221045	0.253063	0.236508	0.226701	0.152386	0.328265	0.233496	0.224488	0.247163	0.307765	0.306947	0.220344	0.224794	1.75548	0.248264	0.239413	0.226136	0.22947	0.165891	0.354456	0.172365	0.262975	0.218451	HSC_only
Babam1	0.24007	0.486298	0.338607	0.27633	0.246609	0.261297	0.403043	0.221509	0.276047	0.250345	0.243317	0.209526	0.22738	0.122952	0.269926	0	0.371961	0.2056	0.31296	0.286868	0.232303	0	0.248908	0.309641	0.267091	HSC_only
Bad	0.267246	0.308144	0.155567	0.259326	0.237623	0.213221	0.370555	0.154438	0.245082	0.221279	0.190838	0.176625	0.225452	0.244806	0.213019	0.953743	0.329875	0.246045	0.24946	0.234079	0.264124	0.354456	0.149398	0.23009	0.177742	HSC_only
Bag1	0.757832	1.02383	0.686142	0.893686	0.688479	0.647977	0.996975	0.571121	0.822999	0.621215	0.66558	0.717617	0.816591	0.493274	0.662407	1.43289	1.10784	0.698392	0.799786	0.63688	0.640407	0.90258	0.690925	0.737984	0.541052	HSC_only
Bahd1	0.0604698	0.0331433	0.0980179	0.0582517	0.0370553	0.0489543	0.0238476	0.0161592	0.047408	0.0562596	0.0824896	0.0904065	0.0389666	0.0621932	0.0433867	0	0.0159644	0.0330968	0.0476042	0.0547957	0.0449172	0	0.0386332	0.0483311	0.0435751	HSC_only
Banf1	0.643063	1.11379	0.60851	0.935266	0.602301	0.506261	1.1391	0.70454	0.854463	0.497908	0.469593	0.63474	0.83182	0.394461	0.51278	0.953743	1.12292	0.580193	0.830996	0.494507	0.393113	0.90258	0.51124	0.785976	0.490373	HSC_only
Baz1b	0.535966	0.886635	0.400487	0.592638	0.431493	0.428777	0.724829	0.313909	0.500624	0.40609	0.410868	0.367711	0.44395	0.223156	0.407881	0	0.822009	0.379241	0.508062	0.389599	0.476659	0.697248	0.443163	0.562702	0.423703	HSC_only
Baz2a	0.235062	0.181232	0.277123	0.203259	0.19196	0.203407	0.15664	0.22494	0.169742	0.196974	0.272288	0.291041	0.265159	0.0304251	0.214239	0	0.190472	0.266282	0.190136	0.179051	0.230845	0.342792	0.194591	0.223382	0.235139	HSC_only
Baz2b	0.538982	0.325362	0.378331	0.489672	0.521017	0.504882	0.395173	0.421792	0.427817	0.490983	0.617716	0.583715	0.553307	0.599322	0.555336	0	0.330507	0.513937	0.431256	0.489313	0.523014	0	0.572893	0.508649	0.49475	HSC_only
Bcat2	0.135714	0.208572	0.154025	0.21319	0.157624	0.173842	0.232124	0.109166	0.210695	0.179454	0.173724	0.166608	0.145784	0.212845	0.172367	0	0.200127	0.204238	0.230986	0.175884	0.200521	0.342792	0.133551	0.220716	0.143985	HSC_only
Bckdk	0.267277	0.524631	0.107134	0.320764	0.284005	0.297242	0.596353	0.27579	0.362866	0.31325	0.286325	0.269578	0.299342	0.158593	0.270331	0.953743	0.539552	0.302841	0.343341	0.285427	0.338904	0.550793	0.193475	0.318872	0.262613	HSC_only
Bcl7a	0.161844	0.296468	0.199353	0.195205	0.137004	0.150517	0.200824	0.0173889	0.178458	0.126914	0.143895	0.117693	0.158939	0.0915252	0.135464	0	0.242264	0.070771	0.181557	0.139776	0.169802	0.208001	0.0640297	0.18174	0.163649	HSC_only
Bcl9	0.164457	0.17802	0.0900891	0.132454	0.165988	0.171779	0.094731	0.208365	0.137351	0.160915	0.205634	0.235252	0.18019	0.142144	0.172657	0	0.0466226	0.156228	0.152371	0.179863	0.169732	0	0.168911	0.163913	0.185798	HSC_only
Bet1l	0.178131	0.154182	0.19343	0.197231	0.229823	0.143555	0.17644	0.0863106	0.168185	0.188646	0.230681	0.25591	0.263201	0.33316	0.150136	0	0.137312	0.171532	0.194373	0.195641	0.166497	0	0.153754	0.215837	0.233236	HSC_only
Bex1	0.594426	0.604503	0.340643	0.583176	0.603341	0.635184	0.810577	0.483747	0.615501	0.66656	0.715514	0.749003	0.741441	0.764413	0.621283	1.43289	0.591376	0.508377	0.608217	0.647604	0.581354	0.764247	0.530638	0.604663	0.623592	HSC_only
Bgn	0.137398	0.179484	0.142084	0.1493	0.151982	0.211353	0.318549	0.0720211	0.179644	0.203619	0.204086	0.227495	0.200053	0.165421	0.208326	1.43289	0.20764	0.25158	0.192108	0.207845	0.218516	0	0.131973	0.1561	0.167072	HSC_only
Bicd2	0.106622	0.145486	0.0956844	0.113867	0.105063	0.0912016	0.111803	0.121766	0.102598	0.0767937	0.0977748	0.0546548	0.0894345	0.107808	0.0967909	0	0.089289	0.056905	0.0880884	0.0837595	0.0627393	0	0.0567322	0.111774	0.106284	HSC_only
Bin2	1.00242	1.10793	0.781036	1.06138	0.909304	0.918983	1.07879	0.889414	1.00953	0.846954	0.904108	0.885641	0.992056	0.706891	0.917997	0	1.10278	0.941555	1.00167	0.846281	0.919317	1.10405	0.69594	0.991114	0.807931	HSC_only
Blvra	0.182246	0.33242	0.125434	0.219979	0.18657	0.179611	0.35748	0.0704174	0.215557	0.161355	0.0975773	0.142811	0.21162	0.0329244	0.169986	0	0.377764	0.1546	0.22079	0.177394	0.131454	0.208001	0.152227	0.216248	0.131488	HSC_only
Bop1	0.201213	0.277335	0.209829	0.332679	0.141061	0.0988495	0.144921	0.222915	0.199053	0.102235	0.0832483	0.106621	0.19923	0	0.111262	0	0.149797	0.0855031	0.205003	0.0904154	0.0793366	0	0.104431	0.1794	0.0936646	HSC_only
Borcs6	0.18607	0.182146	0.164393	0.183887	0.196573	0.191418	0.136978	0.184526	0.153964	0.184428	0.300718	0.242993	0.245195	0.195106	0.177273	0	0.0537207	0.181675	0.155609	0.188152	0.136767	0	0.129955	0.198575	0.156908	HSC_only
Bphl	0.175308	0.260742	0.321183	0.180091	0.185096	0.26069	0.209024	0.246444	0.250763	0.282065	0.228388	0.17441	0.250042	0.0709676	0.260754	0	0.370537	0.232586	0.270878	0.270833	0.280324	0.208001	0.219994	0.272804	0.258954	HSC_only
Bptf	0.795117	0.80215	0.553959	0.708427	0.779186	0.805087	0.736586	0.73287	0.745283	0.697585	0.891234	0.824634	0.926027	0.957726	0.794464	0.953743	0.767001	0.757845	0.746067	0.718477	0.927021	0.752259	0.658716	0.858346	0.880226	HSC_only
Brca2	0.0539479	0.512547	0	0.0753013	0.0485291	0.0717355	0.447954	0.0411875	0.121001	0.0615412	0.106822	0.0475511	0.109153	0.0335932	0.0587898	0	0.498108	0.0286927	0.118562	0.0545478	0.0895843	0.810381	0.0417427	0.122009	0.0712016	HSC_only
Brd7	0.424096	0.439732	0.26241	0.450994	0.397517	0.34034	0.547351	0.339148	0.399408	0.304539	0.328067	0.250769	0.338615	0.381932	0.334014	0	0.384975	0.348011	0.394329	0.304813	0.397312	0.342792	0.311212	0.43986	0.384253	HSC_only
Brf1	0.130126	0.198562	0.204812	0.134899	0.121179	0.113975	0.105043	0.11571	0.11745	0.100654	0.204044	0.141918	0.195577	0.302343	0.122304	0	0.157833	0.17267	0.120733	0.109662	0.114275	0	0.106281	0.113073	0.154961	HSC_only
Brix1	0.423671	0.689277	0.56688	0.52512	0.368634	0.306007	0.495505	0.402802	0.428211	0.301125	0.307253	0.306168	0.439117	0.273533	0.319742	0	0.523522	0.194399	0.4338	0.298179	0.283064	0	0.401869	0.417217	0.290151	HSC_only
Brk1	0.908853	1.13644	1.09916	0.97364	0.90543	0.895637	1.06996	0.765895	0.940264	0.892291	0.823297	0.869201	1.0093	0.699263	0.871801	1.43289	0.995301	0.895679	0.969427	0.874016	0.830565	0.810381	0.714427	0.911902	0.83973	HSC_only
Brms1	0.212654	0.30023	0.238443	0.257845	0.253073	0.19687	0.285846	0.30155	0.235133	0.203201	0.186671	0.160199	0.234022	0.160569	0.20144	0	0.277594	0.164588	0.226484	0.227786	0.15188	0.342792	0.173201	0.227467	0.211558	HSC_only
Brox	0.119421	0.0734906	0.182561	0.113303	0.12244	0.121789	0.07791	0.146073	0.128492	0.128803	0.123246	0.171024	0.171099	0.166684	0.124644	0	0.190658	0.13659	0.12548	0.125003	0.180911	0.342792	0.176871	0.193237	0.174741	HSC_only
Brwd1	0.168798	0.0995901	0.123913	0.213936	0.155877	0.122676	0.149527	0.176943	0.146095	0.109624	0.244638	0.194683	0.231077	0.032993	0.120768	0	0.100307	0.0758015	0.135918	0.105717	0.10823	0	0.166379	0.198237	0.12912	HSC_only
Btbd2	0.131419	0.179831	0.12163	0.147713	0.153032	0.171777	0.227009	0.197207	0.186391	0.165117	0.16271	0.0806933	0.139127	0.123247	0.151457	0	0.239913	0.211812	0.161543	0.169921	0.136475	0.752259	0.0933466	0.178024	0.128642	HSC_only
Btbd7	0.281304	0.154594	0.433539	0.271457	0.249662	0.284855	0.227957	0.329203	0.234517	0.249986	0.413273	0.317086	0.34069	0.145701	0.27735	0	0.184819	0.308707	0.225956	0.272831	0.322931	0	0.350888	0.331546	0.324735	HSC_only
Btf3l4	0.107736	0.171746	0.129014	0.120885	0.116008	0.1121	0.172388	0.0442726	0.139925	0.10788	0.215985	0.207341	0.163489	0.165437	0.11733	0	0.143286	0.103089	0.127867	0.111689	0.14614	0	0.0797747	0.160915	0.142569	HSC_only
Bud23	0.269957	0.317314	0.182571	0.331326	0.242317	0.223957	0.384646	0.225298	0.310904	0.206175	0.193577	0.219554	0.220893	0.192112	0.227035	0.953743	0.271284	0.219196	0.29331	0.226933	0.148529	0.208001	0.190719	0.2793	0.16748	HSC_only
Bzw1	0.925518	1.1023	0.875501	1.03644	0.772035	0.701013	1.03374	0.748436	0.856162	0.640816	0.864618	0.966382	0.933394	0.790104	0.735201	1.75548	0.903747	0.664842	0.833349	0.657666	0.706637	1.10405	0.82491	0.823302	0.669572	HSC_only
Bzw2	0.567349	0.704446	0.539575	0.798467	0.463308	0.428923	0.592905	0.418087	0.718931	0.369173	0.334074	0.432311	0.629626	0.272642	0.42703	0	0.531915	0.348614	0.708096	0.37551	0.390087	0.908949	0.422687	0.659971	0.320895	HSC_only
C1d	0.673794	0.799368	0.721039	0.713659	0.688065	0.630746	0.757024	0.612628	0.65584	0.645039	0.760662	0.815791	0.790105	0.812077	0.657562	0.953743	0.730497	0.767211	0.651402	0.662131	0.706319	1.15311	0.583873	0.768727	0.759943	HSC_only
C1qbp	1.10784	1.22221	1.08211	1.44795	0.98813	0.883543	1.12147	0.868147	1.25025	0.785483	0.712307	0.978307	1.17348	0.602464	0.846776	1.43289	1.13629	0.795635	1.20325	0.796394	0.74084	0.637604	0.685784	1.08634	0.779203	HSC_only
C1qtnf12	0.20972	0.393422	0.118368	0.242282	0.233199	0.257532	0.35949	0.342796	0.327359	0.273209	0.219929	0.247864	0.256378	0.209109	0.259241	0	0.427984	0.264306	0.325297	0.253418	0.247901	0.550793	0.213584	0.282853	0.196152	HSC_only
C1qtnf4	0.0724824	0.0411471	0	0.0633069	0.140459	0.0948162	0.0441014	0.0166018	0.0685203	0.125488	0.157897	0.147415	0.0964097	0.124395	0.106721	0	0.0554081	0.0956587	0.0714278	0.124889	0.127545	0	0.0830768	0.0906658	0.15963	HSC_only
C920006O11Rik	0.0428022	0.0459228	0.0611957	0.0407172	0.0602675	0.0638031	0.0499777	0.0125262	0.055083	0.0498514	0.0617281	0.109169	0.0977736	0.075375	0.0672461	0	0.0322252	0.0612571	0.0482821	0.0688711	0.038481	0.544258	0.0350464	0.0751854	0.0654527	HSC_only
CAAA01118383.1	0.18831	0.224483	0.478711	0.207141	0.20228	0.174091	0.197494	0.192124	0.170849	0.147839	0.214302	0.236431	0.228021	0.126049	0.164586	0	0.180371	0.268133	0.191502	0.17505	0.164803	0	0.183984	0.191984	0.168819	HSC_only
Cacnb2	0.225378	0.0689508	0.26133	0.198021	0.154941	0.146431	0.0464641	0.172235	0.124387	0.128551	0.252746	0.19449	0.196677	0.201849	0.148745	0	0.0648673	0.191229	0.136412	0.141799	0.200338	0	0.234364	0.162217	0.216185	HSC_only
Cacybp	0.780857	1.15925	0.955904	1.05768	0.725671	0.606673	1.05789	0.689051	0.771818	0.541359	0.555508	0.572691	0.813789	0.472722	0.636057	0.953743	0.949613	0.766397	0.855125	0.576331	0.636017	1.10405	0.69347	0.698475	0.578106	HSC_only
Calm1	1.32517	1.80188	1.05579	1.49389	1.34437	1.34815	1.91095	1.28923	1.52724	1.29619	1.30592	1.44327	1.47525	1.21774	1.32174	1.43289	1.84798	1.31983	1.47893	1.2365	1.1196	1.49892	1.194	1.33254	1.25463	HSC_only
Calm3	0.693077	1.41085	0.401626	0.786223	0.664989	0.704039	1.25483	0.601598	0.805728	0.662122	0.649403	0.694638	0.752962	0.711065	0.713308	1.43289	1.15501	0.677207	0.826586	0.685355	0.711421	1.04192	0.545246	0.798531	0.602411	HSC_only
Calr	1.60008	1.83247	1.90537	1.89288	1.53622	1.54352	1.96415	1.57428	1.81033	1.50078	1.48883	1.61553	1.73629	1.37997	1.60502	1.75548	2.0008	1.65673	1.87121	1.5726	1.49125	1.74782	1.42064	1.64108	1.3621	HSC_only
Camk2n1	0.0700622	0.0480252	0.133396	0.0354577	0.0953399	0.0648599	0.0397285	0.0460347	0.029021	0.0617108	0.106074	0.185345	0.0692449	0.141306	0.0729297	0	0	0.0882165	0.0282063	0.0705622	0.0961901	0	0.100918	0.0481435	0.107993	HSC_only
Capg	0.746664	0.676004	0.56142	0.677527	0.780101	0.814588	0.709805	0.673823	0.752988	0.81406	0.671444	0.671182	0.683375	0.692876	0.854864	0	0.71629	0.875415	0.783247	0.845158	0.662381	0.90258	0.64358	0.75914	0.715402	HSC_only
Capn2	0.118268	0.158668	0.131722	0.104267	0.127696	0.123403	0.102006	0.22099	0.116805	0.118464	0.193798	0.19343	0.152963	0.192727	0.124999	0	0.0976147	0.102613	0.110268	0.132196	0.110308	0.208001	0.0929301	0.141881	0.178222	HSC_only
Capza2	0.996099	1.18924	1.55533	1.04362	1.00093	0.918663	1.02475	1.29126	0.988737	0.899914	1.14898	1.10047	1.04867	1.12901	0.943746	1.43289	1.06169	1.30908	0.990236	0.934758	1.0522	1.24725	1.45346	1.04291	1.1154	HSC_only
Cars2	0.218745	0.295973	0.154121	0.28467	0.215704	0.215313	0.304833	0.139151	0.256861	0.212979	0.172459	0.175851	0.235341	0.139253	0.196105	0	0.22323	0.160975	0.252698	0.221824	0.212445	0.342792	0.135146	0.290038	0.208444	HSC_only
Casc4	0.1595	0.148503	0.0665748	0.190599	0.173016	0.149506	0.162057	0.109185	0.170056	0.150414	0.256059	0.212181	0.224627	0.212936	0.163452	0	0.146904	0.145505	0.161647	0.125897	0.191996	0.342792	0.185298	0.194214	0.206251	HSC_only
Casd1	0.233912	0.127551	0.331817	0.223836	0.2289	0.23858	0.214472	0.302848	0.221107	0.235399	0.283885	0.296115	0.317402	0.356295	0.250065	0	0.289146	0.248325	0.228657	0.224217	0.393937	0.354456	0.236544	0.316028	0.231625	HSC_only
Casp2	0.164166	0.259964	0.183928	0.181732	0.170772	0.184735	0.301982	0.139665	0.194932	0.15529	0.18872	0.141439	0.164417	0.100885	0.176864	0	0.280369	0.268556	0.220104	0.194405	0.251694	0.208001	0.256511	0.238776	0.218102	HSC_only
Casp3	0.213935	0.379895	0.169517	0.245194	0.191268	0.264897	0.509417	0.276969	0.297277	0.245681	0.355949	0.38397	0.396328	0.185591	0.273563	0	0.538802	0.136025	0.283339	0.259262	0.318133	0.208001	0.20656	0.333087	0.241751	HSC_only
Casp8ap2	0.224588	0.56564	0.339392	0.284023	0.227753	0.184136	0.462829	0.199426	0.272999	0.18745	0.253094	0.196528	0.187249	0.349755	0.199475	0	0.469325	0.190083	0.268402	0.209186	0.313326	0.208001	0.228976	0.240921	0.220347	HSC_only
Cat	0.289042	0.177784	0.126677	0.235072	0.26062	0.356307	0.349939	0.346188	0.327671	0.36182	0.456708	0.415411	0.423847	0.528895	0.316535	0.953743	0.227299	0.210393	0.285466	0.300436	0.320677	0.342792	0.331254	0.332131	0.439424	HSC_only
Cav2	0.067534	0.0899755	0.0804992	0.0414544	0.0841408	0.113378	0.132023	0.112624	0.0738474	0.1362	0.221856	0.201713	0.10212	0.319696	0.112124	0	0.117477	0	0.0821895	0.120603	0.0952002	0.342792	0.0953468	0.0991877	0.141257	HSC_only
Cavin2	0.150204	0.308158	0.0931709	0.147662	0.138803	0.201941	0.413358	0.18478	0.234896	0.198901	0.209352	0.151653	0.172605	0.0673946	0.231017	0	0.467911	0.166551	0.265759	0.193535	0.193186	0.697248	0.118894	0.274996	0.213156	HSC_only
Cbl	0.258568	0.36672	0.231711	0.247242	0.270196	0.298791	0.271478	0.238536	0.264999	0.259341	0.437596	0.435222	0.4861	0.262164	0.300824	1.75548	0.30848	0.217299	0.285608	0.281088	0.41425	0.342792	0.219842	0.331392	0.362718	HSC_only
Cblb	0.0839743	0.039913	0.188992	0.0759649	0.0833211	0.0874675	0.0420865	0.175691	0.0806827	0.0816813	0.183786	0.159157	0.193013	0.112849	0.0984851	0	0.149821	0.0782163	0.0732283	0.10964	0.131993	0	0.146076	0.0742935	0.131269	HSC_only
Cbx5	0.358543	0.85584	0.465441	0.408544	0.330265	0.350875	0.921429	0.490337	0.466353	0.332315	0.383691	0.324743	0.415784	0.30238	0.329984	0	0.88788	0.446336	0.429407	0.330753	0.467292	0.559788	0.262012	0.391341	0.342818	HSC_only
Cby1	0.068422	0.251212	0.0520371	0.0770588	0.069223	0.10687	0.306443	0.0178163	0.120465	0.0945597	0.0927422	0.0387609	0.0573942	0.0298939	0.111553	0	0.319749	0.0369536	0.117881	0.107188	0.0867771	0	0.0600881	0.119958	0.0984069	HSC_only
Ccdc117	0.070719	0.0744338	0.117403	0.0849362	0.0893269	0.0853619	0.108893	0.139989	0.0833263	0.090063	0.0577021	0.0440425	0.0475544	0.0326124	0.0755188	0.953743	0.0630261	0.0630933	0.07798	0.0869322	0.109501	0.342792	0.117697	0.092145	0.116146	HSC_only
Ccdc130	0.0689845	0.0724552	0.0351608	0.0731028	0.0645185	0.0713521	0.0355887	0.10422	0.0710525	0.0631689	0.0297038	0.0318483	0.0574239	0	0.0804127	0	0.0579777	0.0926193	0.0793668	0.0857483	0.0614195	0.342792	0.0486247	0.0852563	0.0666834	HSC_only
Ccdc134	0.0584578	0.137062	0.0440821	0.094254	0.0511324	0.0356914	0.0824424	0.0658069	0.0575817	0.0484622	0.031435	0.0457306	0.0475374	0.0329244	0.0360143	0	0.119921	0.0257444	0.0575554	0.0561989	0.0282013	0	0.0396774	0.0636405	0.0567875	HSC_only
Ccdc166	0.0495348	0.0952589	0.0533529	0.0913421	0.0599503	0.0582637	0.0935143	0.0209975	0.0909543	0.0720621	0.0435595	0.0634724	0.0135954	0	0.0623264	0	0.137727	0.0438574	0.0825376	0.0681982	0.051074	0	0.00743525	0.0816649	0.0830064	HSC_only
Ccdc167	0.0832382	0.164101	0.0335076	0.103715	0.0687929	0.0795848	0.206449	0.157872	0.122811	0.0755152	0.0516189	0.0472029	0.0594124	0.0337368	0.0689486	0	0.216837	0.0463864	0.114458	0.0677614	0.0525978	0	0.0740858	0.116401	0.0925681	HSC_only
Ccdc173	0.0395574	0.024538	0	0.0301834	0.0333128	0.0539383	0.0424092	0.058597	0.0504535	0.06583	0.0321046	0.0233596	0.00607088	0	0.0613682	0	0.05311	0.0783454	0.0509999	0.0717126	0.164041	0	0.108864	0.0701755	0.108913	HSC_only
Ccdc22	0.110889	0.235098	0.27848	0.15726	0.131819	0.128116	0.268213	0.0673443	0.175493	0.131789	0.160723	0.109787	0.173353	0.0599934	0.145554	0.953743	0.244456	0.133135	0.169202	0.127715	0.17885	0.342792	0.139453	0.182818	0.143074	HSC_only
Ccdc43	0.117727	0.134371	0.137711	0.151958	0.130909	0.127552	0.211695	0.104904	0.142067	0.122619	0.170693	0.0688225	0.139441	0.0345896	0.118901	0	0.149411	0.218823	0.150282	0.108059	0.115254	0.208001	0.0968212	0.14751	0.141311	HSC_only
Ccdc58	0.187668	0.322047	0.165991	0.232346	0.166898	0.171421	0.279447	0.186632	0.216456	0.170563	0.146761	0.148255	0.202597	0.103082	0.162345	0	0.295255	0.197658	0.202339	0.166389	0.218441	0	0.192313	0.188386	0.215033	HSC_only
Ccdc60	0.0593752	0.0188061	0	0.0471772	0.0496118	0.0641396	0.0375418	0.0679797	0.0405408	0.0512722	0.0868003	0.0915081	0.079551	0.0778775	0.0520648	0	0.0109498	0.0164896	0.0465984	0.0533372	0.0838718	0.342792	0.0315487	0.0481865	0.070883	HSC_only
Ccdc9	0.298033	0.137971	0.156232	0.28394	0.238332	0.202745	0.191082	0.215955	0.219984	0.213241	0.304825	0.25391	0.307788	0.340678	0.231724	0	0.193678	0.183472	0.220133	0.188123	0.29405	0	0.289778	0.257965	0.231291	HSC_only
Ccdc91	0.130838	0.185703	0.0904327	0.123596	0.121347	0.173259	0.153388	0.120525	0.195386	0.175655	0.16443	0.14077	0.148048	0.1942	0.162533	0	0.16056	0.14861	0.170828	0.152474	0.163658	0.208001	0.133311	0.188892	0.170253	HSC_only
Ccl27a	0.154683	0.160794	0.0345868	0.120882	0.149703	0.180928	0.152018	0.201185	0.158098	0.169549	0.281897	0.248102	0.262529	0.291101	0.191432	0	0.141301	0.126487	0.152521	0.16258	0.295218	0	0.173949	0.220902	0.225846	HSC_only
Ccnd1	0.195947	0.184325	0.0797001	0.296114	0.210971	0.27556	0.241141	0.228812	0.411717	0.215781	0.205235	0.271414	0.313313	0.129857	0.23536	0	0.204708	0.263567	0.365453	0.199982	0.207825	0	0.129323	0.367501	0.239326	HSC_only
Ccnh	0.428385	0.558888	0.666712	0.533269	0.393708	0.454669	0.631755	0.394521	0.550995	0.428653	0.472093	0.395749	0.602958	0.267106	0.443421	0	0.608358	0.519008	0.527216	0.459618	0.452874	0.752259	0.371311	0.556851	0.494546	HSC_only
Ccrl2	0.170699	0.0553427	0.348961	0.093141	0.0871602	0.230814	0.0866189	0.298668	0.124051	0.142105	0.275804	0.166155	0.274663	0.0683263	0.221851	0	0.192056	0.443754	0.132998	0.128156	0.254853	0	1.22231	0.231204	0.179558	HSC_only
Cct3	1.21631	1.21785	1.15382	1.53181	1.07779	0.937559	1.19003	1.20978	1.28051	0.868557	0.831427	0.979095	1.24691	0.722866	0.936037	1.43289	1.30524	1.12717	1.29809	0.8683	0.743479	0.752259	1.20229	1.16999	0.804738	HSC_only
Cct5	1.41684	1.56011	1.34725	1.6181	1.28949	1.17404	1.44464	1.26512	1.36802	1.15164	0.984755	1.15208	1.21154	1.03242	1.25189	0	1.54621	1.12614	1.47785	1.21625	1.13749	0.637604	1.17258	1.33681	1.08805	HSC_only
Cct7	1.04199	1.32159	0.980535	1.28185	1.02332	0.94457	1.29283	1.09834	1.18103	0.899577	0.97648	1.03472	1.12613	0.855054	0.957378	1.75548	1.32609	1.09371	1.1835	0.906124	0.937827	1.24918	0.896144	1.07889	0.786716	HSC_only
Cct8	1.23522	1.3712	1.45145	1.47294	1.10036	0.989142	1.24682	1.15952	1.28941	0.943467	0.887578	1.07939	1.30068	0.769098	1.00593	0	1.27321	1.0591	1.31403	0.988994	0.906262	0.980396	1.04397	1.18871	0.913277	HSC_only
Ccz1	0.300404	0.349058	0.23031	0.291343	0.262838	0.279025	0.40041	0.237889	0.284121	0.26085	0.316852	0.312725	0.399298	0.635307	0.30284	0	0.367015	0.244578	0.273939	0.253053	0.27042	0.208001	0.325838	0.311902	0.264614	HSC_only
Cd2ap	0.254271	0.21149	0.162597	0.23432	0.277997	0.220153	0.150983	0.289588	0.192453	0.204045	0.246011	0.302844	0.259053	0.399749	0.22167	0	0.209342	0.333486	0.203154	0.215211	0.259622	0	0.315666	0.263951	0.307294	HSC_only
Cd320	0.144203	0.12134	0.23551	0.218411	0.128228	0.150635	0.139801	0.137076	0.207843	0.148593	0.0929912	0.118227	0.18726	0.112442	0.144519	0	0.165344	0.161646	0.186568	0.135757	0.122002	0.354456	0.0992791	0.176219	0.0808165	HSC_only
Cd38	0.0557147	0.0287908	0.0337877	0.0409673	0.0871325	0.0676268	0.0164173	0.0171948	0.0423167	0.0722976	0.0795816	0.0719844	0.0467248	0.0753277	0.0531702	0.953743	0.0107636	0.0780855	0.0432616	0.0733609	0.107753	0	0.0883375	0.0676132	0.0948075	HSC_only
Cd74	0.653765	0.3549	1.05109	0.598414	0.705747	0.682141	0.162686	1.56755	0.687881	0.768652	0.724846	0.942187	0.829685	0.96587	0.700914	0	0.255259	1.31968	0.674835	0.809834	0.547547	0	0.944406	0.527517	0.562759	HSC_only
Cd81	1.5308	1.48418	1.50194	1.5055	1.60439	1.62606	1.46644	1.7288	1.6306	1.70553	1.74349	1.76561	1.56259	1.91218	1.64632	1.75548	1.59897	1.69642	1.64924	1.71653	1.5489	0.90258	1.3316	1.54601	1.65984	HSC_only
Cd82	0.219207	0.150801	0.233735	0.147633	0.23288	0.247663	0.119816	0.419826	0.176636	0.298938	0.356492	0.313305	0.23363	0.565028	0.265033	0	0.194584	0.369903	0.188923	0.297786	0.339062	0	0.283283	0.229984	0.297688	HSC_only
Cdc123	0.311684	0.577372	0.287543	0.387665	0.308178	0.306015	0.549833	0.260511	0.348839	0.292354	0.322958	0.249695	0.32404	0.303596	0.307742	0	0.621458	0.324391	0.359667	0.288773	0.325667	0.810381	0.309619	0.376061	0.341976	HSC_only
Cdc16	0.301214	0.239289	0.206436	0.35016	0.290979	0.255951	0.380245	0.398075	0.291134	0.233404	0.226488	0.2075	0.253027	0.188817	0.249183	0	0.417928	0.256209	0.275932	0.25115	0.251392	0	0.218021	0.322556	0.255609	HSC_only
Cdc26	0.719245	0.798865	0.401918	0.780762	0.695785	0.674982	0.758564	0.784467	0.71313	0.673665	0.669986	0.628483	0.792864	0.636257	0.70365	0.953743	0.725964	0.636286	0.768889	0.682671	0.836954	0.467589	0.563624	0.721088	0.667243	HSC_only
Cdc37l1	0.360938	0.466105	0.350439	0.386754	0.343041	0.269175	0.28367	0.345222	0.304601	0.277359	0.358906	0.385336	0.446393	0.429644	0.279756	0	0.397251	0.237016	0.312305	0.289503	0.391328	0.550793	0.216975	0.343024	0.397287	HSC_only
Cdc42bpb	0.0519717	0.0686978	0	0.0528583	0.0521235	0.0472635	0.0648063	0.0778921	0.051289	0.0449872	0.0865428	0.123126	0.0709278	0.108471	0.0502383	0	0.0192773	0.0969734	0.0499152	0.0509931	0.0420877	0	0.0386358	0.0470647	0.0712152	HSC_only
Cdc5l	0.46043	0.685916	0.454902	0.493084	0.456263	0.415632	0.805685	0.326742	0.46465	0.363454	0.353858	0.33604	0.461362	0.319747	0.404933	0	0.674664	0.476174	0.450758	0.396163	0.50466	0.697248	0.428006	0.51335	0.457349	HSC_only
Cdc6	0.0249804	0.117838	0	0.050214	0.042298	0.0300591	0.285651	0	0.0563902	0.0311294	0.0473077	0.0260194	0.0205303	0	0.0304001	0	0.189562	0.0380117	0.0611551	0.0422102	0.0185977	0.208001	0.0131514	0.0440026	0.0281548	HSC_only
Cdca7l	0.270305	0.607525	0.386174	0.43774	0.259907	0.31599	0.581797	0.317455	0.501097	0.344765	0.306363	0.296513	0.495219	0.233522	0.334491	0.953743	0.616319	0.380048	0.457737	0.323766	0.333854	0.354456	0.304383	0.468839	0.356291	HSC_only
Cdk11b	0.81806	0.44513	0.535967	0.574657	0.49053	0.973839	0.611579	0.559837	0.619304	0.52107	0.687667	0.475154	0.637912	0.681196	0.954619	0	0.632724	0.560313	0.638999	0.45641	0.839519	0.208001	0.455783	0.575718	0.491838	HSC_only
Cdk13	0.346964	0.395948	0.456589	0.324374	0.310398	0.27046	0.302541	0.25372	0.254462	0.256654	0.320093	0.385873	0.417082	0.501284	0.30115	0	0.314042	0.200303	0.279782	0.272684	0.379021	0.342792	0.310761	0.312037	0.279102	HSC_only
Cdk5rap3	0.265956	0.254208	0.116805	0.360962	0.278215	0.275261	0.382783	0.357007	0.332511	0.253913	0.211011	0.223669	0.231893	0.289564	0.300519	0	0.314752	0.26956	0.357929	0.283679	0.268099	0.208001	0.215809	0.314522	0.332562	HSC_only
Cdkn1c	0.406672	0.28795	0.275996	0.347419	0.516915	0.541185	0.463333	0.534918	0.478268	0.707119	0.670703	0.761891	0.553921	0.651525	0.546072	0	0.49634	0.586118	0.456627	0.605455	0.633789	0.208001	0.4302	0.442708	0.672967	HSC_only
Cds2	0.102193	0.0649044	0.0916303	0.074806	0.0985352	0.101235	0.0864391	0.0477694	0.0766589	0.0850252	0.156814	0.170087	0.155892	0.149004	0.107946	0	0.167257	0.125666	0.0850824	0.112433	0.123767	0	0.048359	0.104197	0.113418	HSC_only
Cdv3	0.701007	0.871782	0.540347	0.841345	0.532767	0.448604	0.636329	0.46773	0.560319	0.350518	0.67259	0.68686	0.697706	0.395711	0.475618	0.953743	0.74406	0.604279	0.550301	0.356939	0.515831	1.15505	0.40757	0.543781	0.439111	HSC_only
Cebpd	0.0881415	0.0419333	0.116755	0.066145	0.0890092	0.0794629	0.0345282	0	0.0380348	0.0444322	0.12188	0.108174	0.0516711	0.0919568	0.070584	0	0.0402201	0.12839	0.0290107	0.042288	0.138564	0	0.685197	0.117364	0.120111	HSC_only
Celf2	1.00995	0.818364	1.01573	0.889319	0.928839	1.11097	0.90742	1.01343	1.02831	1.01858	1.40325	1.28232	1.22361	1.15998	1.13662	0	0.933155	1.18728	1.03747	1.08633	1.25686	0.895465	1.24184	1.18102	1.1988	HSC_only
Cenpm	0.0191687	0.753885	0	0.053901	0.0123896	0.0268256	0.764342	0.0190489	0.090923	0.0192464	0.0190518	0.0180045	0.0424617	0	0.0189693	0	0.677375	0.0269776	0.0705572	0.0164246	0.0119586	0	0.0140436	0.0395627	0.0217879	HSC_only
Cenpo	0.0325976	0.213969	0	0.0412613	0.0356871	0.0358241	0.232808	0.0434195	0.0447799	0.04078	0.0445971	0.037563	0.0464117	0.0630375	0.0380446	0	0.218607	0.0314035	0.0462754	0.0319528	0.0397907	0.550793	0.0264622	0.0454403	0.0414136	HSC_only
Cenpu	0.018664	0.179477	0	0.0350333	0.0257358	0.0312567	0.289282	0	0.0539091	0.0307387	0.0393253	0.0265457	0.0322859	0	0.0422154	0	0.270955	0.0615956	0.0496714	0.0321588	0.0418725	0	0.0258088	0.0330068	0.0499205	HSC_only
Cenpv	0.169162	0.39249	0.0793152	0.264863	0.141723	0.170982	0.449606	0.242349	0.293213	0.182663	0.153195	0.158156	0.216937	0.122031	0.187229	0	0.389611	0.232385	0.283901	0.170236	0.149246	0.550793	0.159819	0.170195	0.172209	HSC_only
Cep131	0.0273623	0.0817672	0	0.0387021	0.0319067	0.0359394	0.0742803	0	0.0549087	0.0345123	0.0111809	0.0315672	0.0483488	0	0.0405294	0	0.0883926	0	0.0500984	0.0367004	0.0363196	0	0.0345909	0.0423725	0.0481149	HSC_only
Cep57	0.283678	0.498721	0.18724	0.279739	0.241488	0.295812	0.474393	0.293509	0.295117	0.274903	0.240621	0.240549	0.328631	0.154039	0.325005	0.953743	0.347331	0.199535	0.29058	0.267964	0.2125	1.01185	0.189102	0.309965	0.277156	HSC_only
Cep78	0.0366036	0.0690605	0.0945555	0.069132	0.033451	0.0485836	0.132002	0.0953627	0.0670056	0.0335573	0.0122397	0.0326187	0.080419	0	0.0456835	0	0.131473	0.0255823	0.0656032	0.0456458	0.0338339	0	0.0273551	0.0379266	0.0392007	HSC_only
Cep83	0.217834	0.23344	0.369245	0.273789	0.183301	0.197429	0.366006	0.2758	0.239363	0.189261	0.348055	0.343156	0.382506	0.228117	0.168309	0	0.305037	0.2847	0.213095	0.157066	0.207411	0.342792	0.289423	0.198114	0.20608	HSC_only
Cfdp1	0.52925	0.743745	0.390558	0.604895	0.495812	0.529758	0.680656	0.398031	0.609429	0.514354	0.503538	0.49213	0.678478	0.64805	0.541439	0.953743	0.608687	0.599226	0.632706	0.519675	0.327846	0.354456	0.451949	0.597054	0.466235	HSC_only
Cfl1	2.00752	2.37191	1.83528	2.21932	1.97648	1.9742	2.31281	1.99265	2.22453	1.90259	1.91448	2.01283	2.22748	2.05633	1.97161	1.75548	2.38423	1.86245	2.23033	1.91996	1.86705	2.1655	1.81013	2.0815	1.76316	HSC_only
Cfl2	0.435709	0.213717	0.509635	0.364812	0.439404	0.436761	0.397032	0.387589	0.37424	0.403196	0.555169	0.521542	0.53603	0.490842	0.43358	0	0.452688	0.530918	0.353092	0.432013	0.498229	0	0.396884	0.417662	0.40249	HSC_only
Chaf1a	0.0371934	0.397084	0.0345868	0.0866432	0.0305449	0.0350862	0.370041	0.0335481	0.123042	0.024397	0.0812985	0.0133198	0.0789697	0	0.0279684	0	0.401838	0.0119448	0.104601	0.0284326	0.0601118	0.208001	0.0269068	0.0551432	0.0341924	HSC_only
Chaf1b	0.20463	0.557748	0.106181	0.270707	0.188595	0.278531	0.665502	0.215609	0.411119	0.271059	0.267007	0.238334	0.337601	0.165385	0.296728	0.953743	0.54721	0.220485	0.398984	0.283207	0.272577	0.467589	0.149891	0.379491	0.23461	HSC_only
Chchd1	0.622023	0.933286	0.682713	0.769965	0.592526	0.512625	0.858492	0.503111	0.689966	0.520767	0.476308	0.486195	0.610728	0.387848	0.513803	0	0.685441	0.48692	0.651914	0.50998	0.414688	0.208001	0.474204	0.620288	0.507693	HSC_only
Chchd6	0.214044	0.493763	0.288128	0.301424	0.208935	0.228814	0.419611	0.279928	0.341168	0.219506	0.233358	0.273571	0.271927	0.152114	0.242113	0	0.444815	0.344441	0.334676	0.242361	0.216135	0.697248	0.23403	0.29721	0.227981	HSC_only
Chd1	0.418281	0.431427	0.367697	0.392512	0.317824	0.363204	0.351243	0.316632	0.340769	0.264265	0.488377	0.478619	0.441541	0.311113	0.355249	0	0.324308	0.272168	0.317609	0.230099	0.455299	0.697248	0.418712	0.346315	0.278121	HSC_only
Chd3os	0.0470378	0.186385	0	0.0510658	0.0545019	0.0367667	0.215341	0.0840152	0.0676482	0.0485648	0.0113378	0.0352559	0.0172301	0.0290699	0.0373953	0	0.126695	0.0614547	0.0691227	0.0416049	0	0.467589	0.00746245	0.0591057	0.0613625	HSC_only
Chd7	0.171681	0.100034	0.128933	0.151448	0.134837	0.122332	0.0598031	0.145209	0.104956	0.091676	0.406938	0.45984	0.324182	0.267393	0.128192	0	0.0571192	0.105737	0.108878	0.0844477	0.126359	0	0.439891	0.132298	0.135909	HSC_only
Cherp	0.172032	0.155105	0.148078	0.20348	0.180766	0.152057	0.222771	0.205793	0.194887	0.145584	0.13597	0.155862	0.216078	0.271455	0.152794	0	0.289248	0.0745314	0.180186	0.154931	0.0794736	0	0.159633	0.174642	0.164916	HSC_only
Chkb	0.124557	0.164093	0.0861648	0.0626398	0.0816302	0.139958	0.0744118	0.0260439	0.0889537	0.0995329	0.215079	0.173961	0.151658	0.165127	0.162495	0	0.104102	0.12463	0.102357	0.114138	0.17913	0.208001	0.0499895	0.130761	0.146675	HSC_only
Chmp4b	0.717186	0.643735	0.991213	0.761229	0.645818	0.514144	0.53737	0.86647	0.526803	0.488469	0.791906	0.772236	0.775544	0.680018	0.52652	0	0.667089	0.702906	0.555841	0.516871	0.724045	0.697248	1.26437	0.758222	0.622631	HSC_only
Chp1	0.141461	0.204388	0.139448	0.149445	0.164215	0.180296	0.18903	0.0745828	0.162783	0.196945	0.279923	0.319895	0.282205	0.174716	0.208148	0	0.226259	0.200139	0.175737	0.205005	0.24032	0.354456	0.180531	0.204101	0.286591	HSC_only
Chrnb1	0.11164	0.0436916	0.045235	0.0757239	0.0970573	0.109629	0.0727756	0.116618	0.0798945	0.110342	0.148595	0.171479	0.144216	0.238579	0.0950865	0	0.0364627	0.109468	0.091201	0.0975024	0.182403	0.342792	0.0900127	0.0998292	0.123683	HSC_only
Chst2	0.0230761	0	0	0.0257448	0.0414704	0.078282	0.103733	0.0411843	0.0802861	0.073954	0.0714927	0.0449056	0.0174982	0.0309234	0.101632	0	0.0818802	0.0130651	0.0989312	0.101301	0.0973123	0.342792	0.0320854	0.102795	0.117373	HSC_only
Chst7	0.0357705	0.0413068	0	0.0322037	0.0346847	0.0369513	0.0367907	0.0708621	0.0480455	0.0585005	0.0366495	0.0131812	0.0186414	0.032993	0.043744	0	0.0536195	0.069807	0.0399965	0.0427127	0.0459449	0	0.0719915	0.0335833	0.0745657	HSC_only
Chuk	0.139069	0.254536	0.0425184	0.166587	0.125404	0.0908572	0.116693	0.0836384	0.0911637	0.0804958	0.150014	0.131133	0.15465	0.0619943	0.0729907	0	0.165835	0.0651557	0.0918008	0.0824582	0.113454	0	0.156746	0.129327	0.142201	HSC_only
Ciapin1	0.213869	0.353702	0.127186	0.32087	0.193781	0.1283	0.342406	0.202832	0.21957	0.125815	0.137742	0.148624	0.229539	0.13339	0.128879	0	0.290881	0.149175	0.21009	0.12354	0.116863	0.208001	0.131559	0.187438	0.140131	HSC_only
Cinp	0.113277	0.230953	0.0415605	0.187141	0.113711	0.117394	0.332871	0.077086	0.169031	0.100492	0.0829558	0.126106	0.108731	0.0659174	0.10062	0.953743	0.199556	0.0408179	0.153401	0.0786711	0.160168	0	0.11908	0.166681	0.102415	HSC_only
Cisd2	0.717529	0.782755	0.658786	0.756315	0.595947	0.614066	0.759994	0.711925	0.669774	0.531472	0.72979	0.876571	0.85379	0.580932	0.663458	1.43289	0.771502	0.438679	0.675675	0.518346	0.523055	0	0.620474	0.660157	0.563791	HSC_only
Clasp1	0.165923	0.162837	0.116721	0.162902	0.145792	0.133606	0.177528	0.171204	0.137986	0.129683	0.159342	0.15962	0.17011	0.233796	0.145695	0	0.188771	0.0952545	0.143253	0.150353	0.195429	0.208001	0.125805	0.141327	0.20127	HSC_only
Clcn5	0.105706	0.0348713	0.0751947	0.0774992	0.102881	0.0748171	0.070624	0.0415953	0.0541998	0.0647305	0.109351	0.100026	0.0919716	0.127882	0.068979	0	0.0998624	0.0612796	0.0493456	0.0691755	0.157315	0	0.130307	0.069171	0.111639	HSC_only
Cldnd1	0.476334	0.492554	0.617042	0.381578	0.446667	0.471059	0.493811	0.573845	0.427549	0.48886	0.48817	0.531808	0.52589	0.545567	0.501658	0	0.55921	0.501091	0.441402	0.538003	0.49785	0.208001	0.576396	0.473914	0.581745	HSC_only
Clec1a	0.237358	0.200678	0.255766	0.189397	0.302483	0.332804	0.240325	0.492092	0.276263	0.395498	0.583993	0.509811	0.350749	0.382759	0.34522	0	0.238052	0.389394	0.273754	0.397091	0.399763	0.208001	0.248266	0.389695	0.479377	HSC_only
Clic1	1.79474	2.06167	1.8222	1.7926	1.78231	1.68906	1.97901	1.68331	1.73519	1.70684	1.63909	1.68098	1.66649	1.68539	1.71386	0.953743	1.87992	1.69823	1.75866	1.69629	1.56212	1.18186	1.52122	1.6779	1.63139	HSC_only
Clint1	0.596903	0.714578	0.784824	0.653397	0.553276	0.47667	0.431186	0.456354	0.463866	0.438848	0.719958	0.598378	0.648435	0.566174	0.492194	0.953743	0.555135	0.358702	0.498154	0.424125	0.632996	0.697248	0.655347	0.602908	0.537978	HSC_only
Clip1	0.340986	0.221105	0.35258	0.322433	0.291337	0.320751	0.213899	0.22704	0.305184	0.310024	0.470393	0.382167	0.446559	0.324545	0.323331	0	0.232595	0.27745	0.292239	0.337681	0.424864	0	0.356017	0.356072	0.386795	HSC_only
Clk3	0.273393	0.343979	0.314533	0.234512	0.214282	0.253492	0.258012	0.149256	0.219537	0.202024	0.182968	0.224924	0.254702	0.169297	0.252743	0	0.258422	0.265099	0.217172	0.204812	0.264157	0.342792	0.189756	0.19451	0.244999	HSC_only
Cln6	0.19338	0.419496	0.231779	0.161229	0.186782	0.227969	0.427513	0.166241	0.231587	0.208277	0.198994	0.187896	0.209722	0.177066	0.247882	0	0.392145	0.177512	0.243131	0.202006	0.249898	0.559788	0.143892	0.232341	0.204262	HSC_only
Clpp	0.474605	0.519071	0.361728	0.60178	0.466919	0.364772	0.54228	0.326158	0.47539	0.404202	0.297158	0.377339	0.459983	0.117778	0.382766	0.953743	0.435777	0.448899	0.507087	0.403882	0.43718	0.208001	0.230538	0.431176	0.329015	HSC_only
Clspn	0.0126376	0.613136	0	0.0411341	0.0150738	0.0320129	0.647193	0.0604022	0.0771206	0.0188528	0.0267153	0.0262216	0.0643912	0	0.0356427	0	0.682113	0.0141097	0.0637435	0.0137026	0.0843779	0.467589	0.0404118	0.0475764	0.0332491	HSC_only
Cmas	0.661902	0.490082	0.517056	0.586855	0.69435	0.822684	0.681378	0.625264	0.692519	0.799393	1.04028	0.815708	0.812262	0.903133	0.833626	1.43289	0.595066	0.734348	0.758253	0.846682	0.894237	1.29987	0.643933	0.744811	0.882889	HSC_only
Cmc2	0.11749	0.513488	0.124821	0.145612	0.131913	0.132513	0.564148	0.0235652	0.169823	0.131124	0.0719366	0.0994534	0.112048	0	0.134719	0	0.622318	0.128668	0.151858	0.134364	0.11129	0	0.102226	0.174512	0.106209	HSC_only
Cmss1	0.210183	0.419489	0.262116	0.279273	0.18706	0.201546	0.351023	0.0805634	0.280059	0.192631	0.141146	0.191585	0.250135	0	0.203103	0.953743	0.336318	0.302489	0.258775	0.190414	0.133515	0.550793	0.184528	0.232873	0.199182	HSC_only
Cmtm6	0.226782	0.152909	0.443123	0.211965	0.227111	0.246382	0.199467	0.269799	0.22005	0.26263	0.378261	0.309199	0.337098	0.347643	0.255162	0	0.162193	0.326303	0.257427	0.24014	0.33785	0.354456	0.399252	0.276061	0.289087	HSC_only
Cnih4	0.4661	0.775102	0.407612	0.529472	0.459453	0.385848	0.6793	0.425279	0.463487	0.387899	0.330146	0.376751	0.394858	0.171004	0.387002	0	0.721053	0.32345	0.43263	0.418932	0.395784	0.898713	0.378431	0.413498	0.451325	HSC_only
Cnp	0.203667	0.281955	0.614636	0.203206	0.194851	0.242859	0.327897	0.440922	0.274024	0.26159	0.242352	0.182892	0.213004	0.0952698	0.256452	0	0.206684	0.518996	0.29624	0.270091	0.224072	0	0.372656	0.260291	0.271139	HSC_only
Cntln	0.159353	0.43289	0.0795952	0.207509	0.182134	0.202594	0.459986	0.22242	0.221184	0.176274	0.177197	0.197345	0.20164	0.0346078	0.190575	0	0.546778	0.188849	0.221179	0.148758	0.220039	0.752259	0.179821	0.270788	0.173053	HSC_only
Coa7	0.133212	0.123094	0.2542	0.171741	0.125836	0.113519	0.132986	0.0391195	0.129956	0.0936715	0.100417	0.0691491	0.0673193	0.14713	0.110436	0	0.0837365	0.0287604	0.13498	0.0977229	0.0721559	0.208001	0.0497518	0.127021	0.0894962	HSC_only
Coasy	0.146323	0.25677	0.200178	0.188466	0.170041	0.170761	0.172755	0.137808	0.198082	0.160951	0.172716	0.111659	0.149768	0.093961	0.16347	0	0.116882	0.134981	0.191128	0.174016	0.264129	0	0.101958	0.192152	0.15743	HSC_only
Cog5	0.134015	0.162367	0.16844	0.134194	0.151653	0.148548	0.149179	0.12395	0.153522	0.146461	0.20659	0.217668	0.189341	0.229539	0.160318	0.953743	0.105988	0.171493	0.150257	0.147056	0.18811	0	0.13215	0.190115	0.150934	HSC_only
Cog6	0.0894356	0.0531854	0.202911	0.115018	0.120921	0.121139	0.133023	0.0981122	0.107027	0.121003	0.202197	0.177834	0.196027	0.0646602	0.117711	0	0.117946	0.116276	0.108915	0.128782	0.187503	0.550793	0.107234	0.124347	0.143514	HSC_only
Col4a1	0.206994	0.166527	0.116326	0.162083	0.191169	0.181949	0.182492	0.147518	0.162974	0.165883	0.293634	0.240304	0.215325	0.182099	0.171463	1.75548	0.12425	0.144464	0.150312	0.153902	0.176987	0	0.238998	0.184772	0.223194	HSC_only
Commd1	0.409594	0.691735	0.450666	0.462143	0.395763	0.410161	0.828189	0.441738	0.484076	0.379683	0.4072	0.398797	0.561303	0.238988	0.401426	0.953743	0.805308	0.318368	0.502265	0.398587	0.366457	0.697248	0.340479	0.414572	0.326845	HSC_only
Commd4	0.30491	0.436164	0.41971	0.346902	0.329234	0.36344	0.454543	0.375664	0.387513	0.36027	0.2902	0.319351	0.34946	0.394132	0.363498	0.953743	0.470666	0.313189	0.391238	0.356576	0.389357	0.342792	0.276882	0.365005	0.320144	HSC_only
Copb1	0.600846	0.588889	0.601841	0.615159	0.513804	0.459809	0.443016	0.425836	0.468473	0.440946	0.581769	0.566376	0.597864	0.617759	0.496742	0.953743	0.503806	0.346201	0.499745	0.454201	0.576416	0.544258	0.491377	0.538002	0.541978	HSC_only
Cope	0.747228	0.758163	0.722934	0.882872	0.662882	0.553002	0.681835	0.782863	0.712001	0.569101	0.512645	0.58185	0.659416	0.369406	0.640617	0	0.793793	0.591117	0.748031	0.604787	0.576547	0.208001	0.515297	0.670944	0.614362	HSC_only
Cops3	0.485575	0.802014	0.514005	0.581701	0.452107	0.371199	0.732781	0.536254	0.498979	0.363523	0.34147	0.381638	0.430993	0.207116	0.412782	0.953743	0.736107	0.367139	0.48788	0.341295	0.409248	0.697248	0.412759	0.497593	0.355797	HSC_only
Cops5	0.545462	0.863099	0.254147	0.620571	0.51951	0.461425	0.764986	0.555412	0.565507	0.434777	0.459212	0.461027	0.533301	0.372555	0.456531	0.953743	0.756699	0.372374	0.531192	0.432631	0.500521	0.697248	0.393976	0.506994	0.417553	HSC_only
Cops6	0.64396	0.707465	0.660625	0.720478	0.55711	0.543102	0.747531	0.53194	0.648716	0.523525	0.455303	0.525257	0.570564	0.414031	0.521785	1.43289	0.817112	0.522559	0.649423	0.522572	0.531386	0.208001	0.45186	0.565832	0.411946	HSC_only
Coq4	0.124394	0.194746	0.112233	0.163337	0.125885	0.119759	0.147704	0.14	0.141682	0.104424	0.0913137	0.102764	0.113848	0.0954442	0.118841	0	0.062841	0.106922	0.154758	0.117554	0.0897976	0	0.0788922	0.180607	0.117426	HSC_only
Coq8a	0.233291	0.207671	0.193506	0.174779	0.307682	0.467447	0.276688	0.343684	0.374668	0.522428	0.475604	0.30163	0.271847	0.307202	0.466232	0.953743	0.221569	0.366799	0.386311	0.51577	0.438098	0	0.298995	0.393977	0.492516	HSC_only
Cotl1	0.179703	0.499275	0.0879694	0.193645	0.196139	0.244717	0.477411	0.148359	0.268683	0.259139	0.363486	0.329929	0.246095	0.228621	0.254753	0	0.410805	0.180402	0.269314	0.245145	0.30727	0.208001	0.240433	0.256392	0.227129	HSC_only
Cox18	0.140924	0.236849	0.160523	0.215544	0.147231	0.0944219	0.230374	0.259912	0.163899	0.0969783	0.0840534	0.116865	0.141168	0.155581	0.105361	0	0.257584	0.0908931	0.180216	0.0997114	0.218206	0.208001	0.227922	0.182901	0.123007	HSC_only
Cox4i1	2.08782	2.20998	2.06298	2.09949	2.13576	2.07995	2.18833	2.22198	2.14292	2.13282	1.92683	2.02101	2.05195	1.99775	2.0976	2.622	2.21889	2.07075	2.13909	2.13552	1.91474	1.87595	1.85831	1.98313	1.94636	HSC_only
Cox4i2	0.0953106	0.202567	0.0784451	0.138243	0.0831733	0.0757561	0.17739	0.113377	0.143795	0.0784923	0.0787133	0.0921681	0.135905	0	0.0859949	0	0.133795	0.027684	0.137189	0.0748201	0.0674765	0.208001	0.0552677	0.122445	0.0459065	HSC_only
Cox5a	1.10855	1.67444	1.09918	1.38424	0.98831	0.883462	1.54326	0.863661	1.20995	0.796244	0.805749	0.984374	1.17896	0.755066	0.863764	0.953743	1.61434	0.766944	1.17331	0.829432	0.74102	1.35844	0.806913	0.984937	0.704408	HSC_only
Cox5b	1.25583	1.66575	1.13513	1.42151	1.23093	1.15953	1.62579	1.21641	1.3982	1.1582	1.13129	1.24208	1.41685	1.01	1.1455	1.43289	1.7457	1.09311	1.33245	1.10127	1.17526	1.75477	1.18823	1.30909	1.15293	HSC_only
Cox6a1	0.619324	1.04833	0.523769	0.707697	0.589409	0.52913	0.946385	0.770013	0.681691	0.55527	0.444452	0.5897	0.643939	0.714301	0.606754	0.953743	1.00805	0.661206	0.693829	0.557751	0.592871	1.01185	0.602669	0.726949	0.65696	HSC_only
Cox6b2	0.166474	0.582745	0.087368	0.184468	0.170766	0.187139	0.593759	0.226029	0.227515	0.172491	0.174231	0.194532	0.255994	0.133619	0.174853	0	0.568877	0.0813994	0.196302	0.168821	0.226661	0.544258	0.168494	0.194812	0.147905	HSC_only
Cox7b	0.937446	1.20233	0.984213	1.13262	0.908809	0.79148	1.11808	0.936918	1.00531	0.796465	0.668399	0.786186	0.812795	0.51924	0.860927	0	1.12628	0.859378	1.06889	0.821019	0.769404	1.10405	0.885096	1.05266	0.801835	HSC_only
Cpox	0.155261	0.206493	0.157435	0.190783	0.180595	0.152054	0.244853	0.131788	0.146837	0.168014	0.109646	0.0850272	0.116782	0	0.125669	0	0.247939	0.144736	0.144807	0.168654	0.178601	0	0.0978489	0.136475	0.202432	HSC_only
Cpsf2	0.34052	0.702362	0.441637	0.444522	0.301837	0.268243	0.53414	0.306114	0.347152	0.249293	0.244889	0.248139	0.392065	0.0951863	0.265053	0	0.454734	0.221938	0.357642	0.242441	0.310277	0.342792	0.340345	0.405839	0.32532	HSC_only
Creb5	0.0697304	0.0216611	0.201766	0.0787278	0.0717765	0.0802744	0.0241335	0.115886	0.0578053	0.0561855	0.0470073	0.0824827	0.0482652	0.0614495	0.0856397	0	0.0611984	0.125014	0.0790918	0.0756486	0.0735743	0	0.288429	0.057334	0.0779695	HSC_only
Crebbp	0.507892	0.412327	0.612195	0.419482	0.46353	0.443112	0.339853	0.327402	0.376565	0.41834	0.591383	0.507575	0.485128	0.427076	0.452522	0	0.342043	0.354973	0.370507	0.434461	0.561694	0.342792	0.507958	0.495309	0.527224	HSC_only
Crim1	0.206463	0.167541	0.305327	0.136884	0.190737	0.174131	0.141232	0.166671	0.124616	0.15485	0.326745	0.30966	0.204904	0.143381	0.161451	0	0.203691	0.146146	0.126468	0.163401	0.262118	0	0.411808	0.162148	0.193118	HSC_only
Crk	0.246015	0.358052	0.322831	0.241529	0.228802	0.177256	0.216256	0.101955	0.197617	0.190617	0.311669	0.302879	0.311419	0.419845	0.18051	0	0.265148	0.401267	0.190645	0.193679	0.225339	0.544258	0.34093	0.234307	0.306781	HSC_only
Crtc3	0.304426	0.196679	0.421416	0.280674	0.256283	0.312037	0.207405	0.309078	0.257317	0.259828	0.428402	0.40075	0.305848	0.421529	0.262712	0	0.174958	0.204499	0.240268	0.248373	0.315586	0	0.210914	0.331188	0.320583	HSC_only
Csde1	0.968968	0.989743	0.812039	0.865999	0.808009	0.880974	0.756781	1.01528	0.786914	0.742444	1.07272	0.985101	0.955373	0.760662	0.911371	0.953743	0.751645	0.874346	0.801545	0.758122	1.12451	0.559788	0.966743	0.921318	0.872853	HSC_only
Csk	0.474381	0.758932	0.64719	0.540774	0.486588	0.539932	0.716211	0.504463	0.640186	0.507815	0.444451	0.572873	0.646495	0.716551	0.542486	0	0.634114	0.419313	0.636242	0.540847	0.53635	0.980396	0.425026	0.626856	0.516501	HSC_only
Csnk2a1	0.323935	0.31112	0.251832	0.346232	0.312608	0.304156	0.319176	0.372095	0.332503	0.306423	0.526415	0.43835	0.498522	0.503607	0.315788	0	0.380172	0.333342	0.356274	0.339024	0.504333	0.208001	0.381437	0.477892	0.394229	HSC_only
Csrnp1	0.222099	0.152246	0.214814	0.110083	0.110346	0.309	0.189293	0.26537	0.177358	0.12287	0.433388	0.301064	0.241073	0.485555	0.360131	0	0.227632	0.279086	0.18485	0.127851	0.663239	0.544258	1.41795	0.308458	0.295887	HSC_only
Ctc1	0.0947838	0.172885	0.126526	0.0923255	0.106315	0.109564	0.271307	0.124776	0.134633	0.106814	0.114244	0.088779	0.113422	0	0.0990099	0	0.253896	0.0706538	0.109129	0.107966	0.101292	0.208001	0.0605764	0.154826	0.09923	HSC_only
Ctnnbl1	0.24643	0.368988	0.348313	0.29396	0.224472	0.2709	0.34332	0.24393	0.322237	0.26078	0.272579	0.280634	0.324163	0.240291	0.253846	0	0.417056	0.27372	0.304456	0.250173	0.36487	0	0.273366	0.352577	0.280426	HSC_only
Ctps2	0.231837	0.340664	0.241468	0.243629	0.231996	0.242837	0.285872	0.259295	0.25973	0.242354	0.217348	0.223149	0.255332	0.137559	0.24058	0	0.227421	0.296141	0.271258	0.236821	0.300968	0.208001	0.250672	0.244319	0.213877	HSC_only
Ctsb	0.569689	0.638397	0.418695	0.515149	0.64194	0.588547	0.606418	0.651663	0.580637	0.628099	0.705371	0.711958	0.645387	0.811512	0.600821	0.953743	0.622932	0.79127	0.573174	0.619228	0.570764	0.550793	0.613431	0.6297	0.652131	HSC_only
Ctse	0.0376917	0.0746481	0.0900755	0.0383842	0.0485166	0.0524364	0.0795871	0.0454327	0.0358421	0.0414261	0.0748217	0.074602	0.0444474	0.0337368	0.0553417	0	0.130733	0.0999209	0.041514	0.048848	0.0198714	0	0.0412576	0.0561126	0.0558924	HSC_only
Ctsh	0.280043	0.155566	0.129787	0.194174	0.342118	0.293559	0.0778055	0.292348	0.198724	0.319227	0.319097	0.310223	0.212248	0.301944	0.321859	0	0.109582	0.26051	0.196247	0.360567	0.326794	0	0.23595	0.2052	0.326138	HSC_only
Ctsz	0.454293	0.512955	0.355259	0.470622	0.46112	0.502202	0.630682	0.450296	0.582924	0.532075	0.407349	0.458268	0.537397	0.413527	0.504816	0	0.533871	0.558339	0.549999	0.532031	0.428772	0.550793	0.385473	0.53079	0.455184	HSC_only
Ctu1	0.0422562	0.0450945	0.0425184	0.0823092	0.0716893	0.0398608	0.0603157	0.0558164	0.0708827	0.0605645	0.0396473	0.0377967	0.0202126	0.032993	0.0420089	0	0.119772	0.0287951	0.0672403	0.065647	0.0472318	0	0.0163102	0.0811991	0.0702656	HSC_only
Cuedc2	0.632309	0.852733	0.750095	0.728155	0.637997	0.667842	0.976351	0.629085	0.806723	0.648096	0.676926	0.590244	0.734282	0.501504	0.659153	0.953743	0.925588	0.640246	0.78427	0.657593	0.610416	0.90258	0.57423	0.724578	0.628232	HSC_only
Cul1	0.664014	0.739518	0.689488	0.664662	0.557075	0.507441	0.587449	0.547113	0.551621	0.467096	0.588019	0.63694	0.71972	0.711727	0.508744	1.75548	0.651193	0.578379	0.552706	0.467586	0.490112	0.810381	0.544639	0.594263	0.541916	HSC_only
Cul3	0.505674	0.562272	0.473104	0.464924	0.468634	0.475566	0.539113	0.500725	0.465628	0.440474	0.65013	0.53528	0.595133	0.660876	0.481849	1.43289	0.515948	0.403317	0.446071	0.43123	0.661735	0.354456	0.521087	0.512517	0.475981	HSC_only
Cuta	0.394204	0.65417	0.570926	0.538198	0.361925	0.450333	0.804041	0.42091	0.600445	0.414057	0.391254	0.394507	0.497232	0.326454	0.482688	0	0.801359	0.417862	0.610168	0.450068	0.482534	0.697248	0.353826	0.52594	0.390518	HSC_only
Cutc	0.129995	0.220005	0.213378	0.168738	0.139189	0.16758	0.197552	0.221087	0.185812	0.161515	0.14463	0.0857361	0.143191	0.104445	0.188655	0	0.195401	0.267315	0.186554	0.169921	0.245786	0.342792	0.184204	0.184716	0.173793	HSC_only
Cwc15	0.592095	0.59866	0.579225	0.63282	0.568839	0.491618	0.662164	0.604129	0.528156	0.496285	0.402915	0.474802	0.454623	0.540636	0.578112	0.953743	0.817599	0.484746	0.597129	0.555283	0.58913	0.687464	0.537693	0.596874	0.514612	HSC_only
Cwc25	0.127768	0.0637061	0.305452	0.12026	0.103161	0.162041	0.154112	0.079925	0.113088	0.137463	0.231021	0.197537	0.197115	0.17676	0.190379	0.953743	0.198067	0.140833	0.114192	0.115271	0.207876	0	0.113498	0.165423	0.130204	HSC_only
Cwf19l2	0.385401	0.277372	0.292691	0.323983	0.351202	0.329919	0.273404	0.301673	0.32328	0.330917	0.40778	0.392845	0.463372	0.440461	0.334515	0	0.197653	0.523518	0.323128	0.362577	0.50005	0.544258	0.347123	0.46325	0.404668	HSC_only
Cx3cl1	0.024489	0.0106046	0	0.020756	0.0322056	0.0455639	0.0268505	0.0459498	0.0307514	0.0471339	0.0972753	0.0854746	0.0481891	0.173108	0.0504706	0	0.0605028	0.058896	0.0377271	0.0428145	0.106649	0	0.0569596	0.0585709	0.0612444	HSC_only
Cyb5a	0.791864	0.713094	1.06087	0.827319	0.862279	0.936717	0.968092	0.902099	0.970256	0.999372	1.03263	1.09617	1.11859	0.806558	0.989505	0.953743	0.9828	0.965992	0.999155	0.991112	0.912916	0.752259	0.753175	0.8986	0.863919	HSC_only
Cyb5r1	0.114547	0.242306	0.0823188	0.142508	0.0912608	0.105729	0.244847	0.122229	0.171755	0.109419	0.108577	0.102675	0.154493	0.174876	0.0991636	0	0.172254	0.121845	0.143176	0.109535	0.144512	0	0.0686644	0.16993	0.120579	HSC_only
Cyc1	0.559511	0.754053	0.557191	0.773096	0.549672	0.480413	0.767382	0.595863	0.660801	0.47867	0.484529	0.538796	0.677615	0.366305	0.485884	0	0.737751	0.503547	0.628207	0.460501	0.310995	0	0.484256	0.614693	0.398136	HSC_only
Cyp26b1	0.036186	0	0	0.020409	0.078929	0.0914496	0.0127205	0.0351288	0.0394938	0.144899	0.184484	0.164895	0.0475398	0.275216	0.070902	0	0.0126369	0.0826942	0.0352735	0.0917134	0.0560497	0	0.0567475	0.0520644	0.160948	HSC_only
Cyth3	0.12647	0.108451	0.140155	0.104565	0.119476	0.140322	0.129236	0.171944	0.117114	0.135393	0.245174	0.242089	0.172989	0.0653577	0.137567	0	0.0713209	0.0422297	0.113228	0.137588	0.110382	0.342792	0.127777	0.16655	0.127615	HSC_only
D10Jhu81e	0.257072	0.286005	0.0813785	0.308987	0.270261	0.311262	0.34622	0.166871	0.351813	0.301362	0.306726	0.251998	0.356499	0.202139	0.305198	0	0.254411	0.200362	0.34687	0.329319	0.19848	0.208001	0.194336	0.312015	0.33346	HSC_only
D130040H23Rik	0.0293904	0	0.0520371	0.0398472	0.0405402	0.0417242	0.0185765	0.121691	0.0556428	0.0605696	0.0508402	0.0325555	0.0576735	0	0.0481554	0	0	0.122374	0.0462724	0.0614894	0.0235359	0	0.0297619	0.0719611	0.0821459	HSC_only
D3Ertd254e	0.0922569	0.190953	0.192087	0.0862275	0.0762783	0.0793461	0.106266	0.0608348	0.0732117	0.0804325	0.150764	0.0890506	0.111435	0.139977	0.0646756	0	0.133722	0.0963463	0.0717014	0.0882201	0.0565988	0	0.033143	0.0904261	0.0767238	HSC_only
D930016D06Rik	0.0520176	0.125378	0	0.0572289	0.0400658	0.0373343	0.0346741	0	0.0437191	0.0380381	0.0830156	0.055784	0.0787221	0.0326124	0.0432153	0	0.0947019	0.0271957	0.0400353	0.0280495	0.0426704	0	0.0604736	0.0623519	0.0448255	HSC_only
Dab2ip	0.103004	0.174857	0.172313	0.104264	0.10065	0.157968	0.308033	0.0755945	0.184772	0.160379	0.184932	0.190418	0.129099	0.110185	0.181378	0	0.195422	0.109349	0.158081	0.132859	0.223507	0	0.107396	0.167706	0.17358	HSC_only
Dap3	0.400736	0.653289	0.361655	0.47866	0.378322	0.429861	0.633633	0.362677	0.468108	0.403538	0.46114	0.413355	0.481069	0.241254	0.430782	0	0.565812	0.404899	0.492426	0.400087	0.391024	0	0.381114	0.454197	0.385163	HSC_only
Dars2	0.0314379	0.110775	0	0.039225	0.0294629	0.0640201	0.183167	0.0233568	0.067988	0.0524627	0.0298258	0.0381983	0.0543026	0.0519469	0.0562158	0	0.198775	0.0670674	0.0586893	0.0566603	0.089711	0.208001	0.0380563	0.0497047	0.0732789	HSC_only
Dbf4	0.151899	0.557773	0.129716	0.144998	0.0972231	0.132806	0.42047	0.107044	0.12448	0.0834555	0.158298	0.19861	0.191667	0.0583504	0.138711	0	0.398212	0.106926	0.115144	0.0809315	0.146496	0	0.0727543	0.107702	0.0642606	HSC_only
Dbi	0.853057	1.07887	0.665592	0.950787	0.787791	0.885106	1.14573	0.859178	1.05829	0.90273	0.803019	0.902748	0.963129	0.741485	0.870099	0.953743	1.10768	0.990951	1.00738	0.834807	0.826673	1.10405	0.788058	0.965268	0.812404	HSC_only
Dcaf10	0.134081	0.0948192	0.109474	0.118194	0.105138	0.0781581	0.103954	0.0373636	0.095653	0.0892514	0.119298	0.152367	0.125227	0.130205	0.087973	0	0.111457	0.104747	0.0969125	0.100103	0.160695	0.550793	0.0740591	0.11503	0.132235	HSC_only
Dcaf12	0.153154	0.200559	0.0769029	0.143814	0.154516	0.155424	0.233652	0.192351	0.159765	0.136105	0.0964211	0.140039	0.122049	0.106128	0.155977	0	0.157673	0.164843	0.152211	0.167995	0.205955	0	0.114837	0.176913	0.163348	HSC_only
Dck	0.0306921	0.299647	0.0376498	0.0397246	0.0233336	0.0487683	0.278584	0.11699	0.0713341	0.0445916	0.0221811	0.0456085	0.0466023	0.104421	0.0507408	0	0.253372	0.0306238	0.0714559	0.054506	0.0728258	0.550793	0.130088	0.098465	0.0800108	HSC_only
Dcps	0.34134	0.54112	0.31411	0.374477	0.33644	0.356274	0.626713	0.393574	0.414257	0.348052	0.311788	0.225752	0.440011	0.245958	0.356106	0	0.505747	0.481547	0.419423	0.369598	0.312216	0.208001	0.293661	0.426003	0.296005	HSC_only
Dctn3	0.480346	0.614455	0.686012	0.522682	0.451996	0.476274	0.68668	0.294951	0.523185	0.447573	0.461973	0.433612	0.522109	0.277713	0.501556	0.953743	0.642423	0.47494	0.54745	0.457394	0.470483	0.354456	0.453697	0.505556	0.4023	HSC_only
Dctn4	0.473377	0.462872	0.427978	0.39984	0.377783	0.443805	0.396605	0.354941	0.371673	0.341555	0.487674	0.490806	0.506707	0.371797	0.431758	0.953743	0.448532	0.37593	0.358765	0.347336	0.404137	0.550793	0.360313	0.454289	0.449149	HSC_only
Dctpp1	0.50821	1.12342	0.389953	0.809795	0.413658	0.370253	1.11139	0.348122	0.766709	0.331988	0.23451	0.333223	0.533565	0.0783511	0.350335	0	1.07404	0.275628	0.707918	0.323397	0.263492	0.817272	0.247244	0.530812	0.276907	HSC_only
Ddit3	0.346485	0.183494	0.224476	0.315265	0.296063	0.369051	0.215733	0.240813	0.243644	0.254259	0.216102	0.232583	0.17583	0.0791363	0.391089	0	0.344561	0.27032	0.261579	0.284555	0.235629	0.208001	0.193653	0.212863	0.241128	HSC_only
Ddost	0.730176	1.01941	0.569042	0.913686	0.723733	0.623227	1.00067	0.881038	0.80024	0.615819	0.513399	0.587946	0.673491	0.631002	0.668925	0.953743	0.932862	0.637922	0.837214	0.693439	0.602014	0.90258	0.57543	0.785074	0.649589	HSC_only
Ddx18	0.471154	0.450707	0.654467	0.645675	0.425564	0.422715	0.442408	0.384071	0.563866	0.384961	0.432624	0.37592	0.550653	0.199799	0.377023	0	0.479961	0.439186	0.455496	0.331143	0.425939	0.559788	0.465836	0.564466	0.472739	HSC_only
Ddx39	0.342096	0.980168	0.263432	0.55145	0.273034	0.222889	0.803895	0.388084	0.364388	0.152249	0.264587	0.300428	0.408081	0.255938	0.185345	1.43289	0.744123	0.231838	0.339854	0.176262	0.200574	0.550793	0.218693	0.275441	0.162711	HSC_only
Ddx39b	0.930382	1.36204	1.04897	1.09496	0.878533	0.829971	1.40204	0.840244	1.00161	0.788829	0.783065	0.777755	1.01031	0.733001	0.871885	0	1.46271	1.05204	1.08689	0.875902	0.796194	1.04192	0.835395	0.956698	0.830286	HSC_only
Ddx56	0.294852	0.412164	0.366962	0.411591	0.291	0.232106	0.39266	0.088878	0.294347	0.217509	0.154984	0.19075	0.229918	0.181143	0.211311	0	0.321361	0.204953	0.282548	0.19856	0.184024	0.354456	0.20051	0.263802	0.239295	HSC_only
Decr1	0.209792	0.269559	0.156809	0.242779	0.237143	0.245479	0.312338	0.286083	0.294367	0.24952	0.234457	0.229078	0.298929	0.379337	0.272561	0	0.248258	0.182007	0.273369	0.257	0.247465	0	0.245161	0.290191	0.304137	HSC_only
Dek	0.829848	1.72724	0.895538	0.911236	0.813615	0.773212	1.82457	1.00923	0.976609	0.782561	0.943706	0.874798	1.03343	1.02354	0.810305	1.75548	1.80241	0.808091	0.930735	0.778805	0.870078	1.59641	1.02102	0.904725	0.892343	HSC_only
Dennd1c	0.177159	0.0642234	0.21698	0.147089	0.188125	0.216107	0.102569	0.212916	0.175914	0.22941	0.327374	0.352481	0.283408	0.326745	0.230307	0	0.0844046	0.192926	0.196825	0.241745	0.212177	0.208001	0.209363	0.269885	0.312311	HSC_only
Denr	0.581265	0.750671	0.827598	0.753446	0.553071	0.501129	0.76241	0.3632	0.638044	0.468214	0.499852	0.456581	0.709506	0.487939	0.476765	0.953743	0.667518	0.54949	0.606147	0.46091	0.602533	0.637604	0.45457	0.683998	0.537295	HSC_only
Dffa	0.0695064	0.161446	0.0649003	0.0844142	0.0554746	0.0616278	0.0530999	0.0726767	0.0678423	0.0614301	0.0180512	0.0245883	0.110915	0.0284565	0.0668942	0	0.0629846	0.054522	0.0715608	0.0692518	0.0940752	0.208001	0.071001	0.0861035	0.0877668	HSC_only
Dffb	0.113327	0.0734596	0.0337877	0.0994435	0.077391	0.0878829	0.102507	0.0455693	0.0874459	0.0701568	0.16724	0.11147	0.112749	0.0992523	0.0836622	0.953743	0.121278	0.0594484	0.0931543	0.0835238	0.0747488	0	0.0536547	0.0857421	0.0979776	HSC_only
Dgcr6	0.299102	0.345826	0.241222	0.334365	0.307671	0.331742	0.475039	0.399095	0.376103	0.337188	0.308312	0.301723	0.272925	0.211501	0.327373	0.953743	0.477617	0.33416	0.346681	0.342259	0.298763	0.354456	0.194543	0.353097	0.300155	HSC_only
Dhfr	0.0251932	0.365957	0	0.0941909	0.0414771	0.0527744	0.569322	0.0480321	0.157819	0.0567785	0.0492376	0.0410872	0.0529125	0.0290699	0.0507745	0	0.48733	0	0.138644	0.0559533	0.0568182	0.354456	0.0470275	0.0978312	0.0601798	HSC_only
Dhrs13	0.0756623	0.114678	0.0795952	0.121332	0.0721555	0.0450446	0.215808	0.0167344	0.0938064	0.0474915	0.0377731	0.0313119	0.0714758	0	0.0523337	0	0.095231	0.0436769	0.0966799	0.0591378	0.0488786	0.208001	0.0334479	0.0823492	0.0363528	HSC_only
Dhrs4	0.201301	0.544125	0.128144	0.275236	0.205893	0.213494	0.617228	0.258855	0.291403	0.21626	0.247896	0.187563	0.281416	0	0.232836	0.953743	0.618034	0.236964	0.285871	0.22164	0.194709	0.544258	0.154193	0.290481	0.25834	HSC_only
Dhrs7	0.137624	0.153946	0.222426	0.100511	0.152289	0.215702	0.161892	0.187763	0.152755	0.235644	0.290929	0.245882	0.209652	0.141778	0.209699	0	0.193951	0.252156	0.145969	0.235943	0.239088	0	0.12651	0.161475	0.278203	HSC_only
Diablo	0.433581	0.202519	0.427864	0.434216	0.370606	0.361065	0.362364	0.361501	0.353124	0.330337	0.464785	0.461588	0.464396	0.431762	0.35897	0	0.341752	0.367699	0.356195	0.351336	0.472295	0.208001	0.395114	0.390807	0.343395	HSC_only
Diaph2	0.108671	0.154153	0.045235	0.085574	0.100581	0.121728	0.0707954	0.0521247	0.0867366	0.11841	0.236262	0.141859	0.158535	0.258381	0.12068	0.953743	0.0605587	0.11378	0.0983389	0.106385	0.166107	0	0.12741	0.110348	0.184803	HSC_only
Dicer1	0.272431	0.322817	0.194738	0.321402	0.263117	0.217314	0.329139	0.305329	0.250492	0.234484	0.301514	0.341267	0.329288	0.32825	0.225203	0	0.256049	0.266629	0.267948	0.226251	0.199535	0.208001	0.188828	0.290395	0.305918	HSC_only
Dld	0.345691	0.433873	0.271066	0.40386	0.324234	0.308514	0.424794	0.39873	0.327064	0.272965	0.603815	0.422476	0.443591	0.25583	0.316732	0	0.452846	0.261291	0.352492	0.272925	0.272726	0.550793	0.341287	0.339379	0.403122	HSC_only
Dlg1	0.143534	0.190207	0.141683	0.139265	0.132422	0.146051	0.11863	0.0890328	0.136924	0.140848	0.225347	0.193021	0.266546	0.239894	0.156682	0	0.135077	0.0651273	0.151143	0.152606	0.209177	0	0.145917	0.15804	0.20941	HSC_only
Dna2	0.0480089	0.30794	0	0.0707942	0.0278959	0.0299122	0.252559	0.0266697	0.0858498	0.0339772	0.0209477	0.0408087	0.0869948	0	0.0299718	0	0.229252	0.0312428	0.0743381	0.0339435	0.0238123	0	0.0307449	0.0628069	0.0594833	HSC_only
Dnajb1	0.613015	0.599179	0.490815	0.442436	0.354493	0.794066	0.623571	0.580723	0.51876	0.406382	0.544999	0.463238	0.455209	0.314144	0.851414	1.43289	0.546319	0.359499	0.540077	0.369648	0.656163	0.697248	0.580011	0.533292	0.393675	HSC_only
Dnajb9	0.844541	0.312157	0.766743	0.669202	0.554581	0.712035	0.342042	0.557979	0.470748	0.443935	0.462182	0.390069	0.362508	0.431549	0.766811	0.953743	0.341657	0.539614	0.510428	0.459929	0.46996	0.898713	0.37653	0.458176	0.459555	HSC_only
Dnajc12	0.0629007	0.0544583	0.0415605	0.0372974	0.0726948	0.0978733	0.113253	0.0704814	0.0643925	0.11271	0.162397	0.121349	0.0906517	0.203245	0.0945606	0	0.0869755	0.046122	0.0687959	0.108814	0.0935791	0	0.0786129	0.0713495	0.105901	HSC_only
Dnajc15	0.380065	0.4822	0.411885	0.470671	0.317547	0.279814	0.405949	0.24779	0.388678	0.272061	0.213501	0.234497	0.36751	0.125045	0.269555	0	0.480467	0.19485	0.361961	0.261299	0.332153	0	0.268485	0.337884	0.210591	HSC_only
Dnajc17	0.0764847	0.168874	0.0900891	0.0959648	0.0606779	0.0645815	0.112142	0.0335148	0.0844943	0.0667177	0.0662066	0.0562482	0.0747011	0.0290699	0.0621787	0	0.089701	0.0654637	0.074516	0.0671151	0.0321627	0	0.0537195	0.0925075	0.0889057	HSC_only
Dnajc9	0.287698	1.05068	0.232711	0.413256	0.308848	0.290599	1.10138	0.378729	0.465651	0.312984	0.307518	0.310908	0.379586	0.371281	0.313858	0.953743	1.23982	0.294509	0.422617	0.305472	0.338696	0.559788	0.232211	0.401353	0.331249	HSC_only
Dnm2	0.280011	0.405387	0.10722	0.294455	0.261734	0.264387	0.286546	0.312021	0.284539	0.267014	0.365395	0.323229	0.329874	0.131242	0.257894	0	0.354277	0.33208	0.264712	0.259333	0.261675	0.354456	0.247873	0.292664	0.29935	HSC_only
Dnmt1	0.212436	0.969415	0.297799	0.378187	0.20278	0.267233	1.00465	0.292374	0.456474	0.213533	0.319609	0.219459	0.388724	0.253279	0.237547	0	1.11066	0.224599	0.401019	0.218802	0.351476	0.637604	0.215637	0.349137	0.25871	HSC_only
Dnpep	0.262016	0.302215	0.307725	0.267988	0.24174	0.23704	0.350492	0.22074	0.251779	0.250876	0.196061	0.216217	0.214902	0.214787	0.26201	0	0.199497	0.242684	0.26151	0.248488	0.201818	0.208001	0.195466	0.247112	0.210532	HSC_only
Dnph1	0.169203	0.622893	0.0345868	0.383383	0.12961	0.140173	0.623121	0.123115	0.358682	0.10765	0.074498	0.113813	0.3142	0.0298939	0.141233	0	0.48311	0.0906375	0.362697	0.115449	0.0756051	0.467589	0.101992	0.253374	0.0687582	HSC_only
Dock2	0.577059	0.554175	0.733303	0.532876	0.590444	0.647263	0.489819	0.513659	0.57319	0.57663	0.747068	0.717936	0.711038	0.624077	0.645601	0.953743	0.552161	0.659451	0.588579	0.592495	0.744043	0.90258	0.614996	0.674065	0.584035	HSC_only
Dok1	0.260137	0.245043	0.315038	0.269808	0.294198	0.261257	0.304416	0.223327	0.259698	0.311333	0.386643	0.530563	0.411887	0.595482	0.25568	0	0.223324	0.303731	0.273639	0.338436	0.375373	0.342792	0.271924	0.320272	0.281411	HSC_only
Dot1l	0.0871893	0.18844	0.0787426	0.101583	0.0746602	0.0887364	0.129265	0.0444373	0.106553	0.0873479	0.0708206	0.0744623	0.064823	0.157589	0.0987079	0	0.101289	0.0649877	0.106778	0.0843089	0.0283249	0	0.128571	0.0984434	0.113781	HSC_only
Dpf2	0.400947	0.504879	0.455732	0.401918	0.40076	0.372966	0.420555	0.335389	0.391156	0.350079	0.312503	0.31974	0.378133	0.41988	0.362237	0	0.403261	0.35617	0.408231	0.380527	0.426122	0.697248	0.428785	0.443416	0.410971	HSC_only
Dph3	0.486514	0.517556	0.468924	0.557962	0.423821	0.406911	0.499859	0.314686	0.419047	0.378369	0.577747	0.563413	0.519723	0.28249	0.453806	0.953743	0.471714	0.475016	0.442319	0.403585	0.501919	0	0.444364	0.406529	0.416703	HSC_only
Dpm1	0.479985	0.394705	0.415046	0.396376	0.450203	0.498797	0.400024	0.481783	0.462546	0.478576	0.630108	0.582603	0.503796	0.628972	0.583866	0.953743	0.595961	0.56977	0.482265	0.509962	0.666033	0.697248	0.475957	0.560839	0.563604	HSC_only
Dpp3	0.216263	0.253091	0.280935	0.299449	0.214047	0.239128	0.226959	0.15227	0.263315	0.215896	0.178322	0.180587	0.248302	0.273265	0.248218	0.953743	0.29729	0.270186	0.28931	0.214915	0.324835	0.467589	0.159306	0.271802	0.187937	HSC_only
Dpp8	0.247328	0.316918	0.330148	0.260545	0.211255	0.221422	0.258953	0.247936	0.242878	0.215317	0.38884	0.379057	0.231428	0.250199	0.241036	0	0.206827	0.253367	0.256145	0.250215	0.271778	0	0.160639	0.228626	0.288146	HSC_only
Dpy30	0.481726	0.939981	0.274886	0.558655	0.426619	0.442236	0.968589	0.394477	0.581664	0.439171	0.390282	0.386067	0.528817	0.389128	0.46277	0	0.87825	0.398209	0.539264	0.44416	0.398116	1.04772	0.369884	0.518293	0.415496	HSC_only
Dsn1	0.0343641	0.0727655	0.122275	0.0319582	0.0430948	0.043065	0.220176	0.0451204	0.0416035	0.0350779	0.0372518	0.0292001	0	0.0329244	0.0421722	0	0.17524	0.0520773	0.0355622	0.0374967	0.0338061	0.208001	0.0254626	0.0483527	0.0521412	HSC_only
Dtnbp1	0.475124	0.735803	0.61925	0.47705	0.406333	0.527665	0.747932	0.33614	0.66063	0.46875	0.558453	0.483398	0.802622	0.31294	0.530829	0	0.798317	0.389161	0.618692	0.446359	0.429531	0.354456	0.354792	0.554316	0.51032	HSC_only
Dtx3l	0.173374	0.224423	0.433783	0.179934	0.196877	0.202837	0.186931	0.74737	0.180092	0.196371	0.192215	0.120592	0.167606	0.138708	0.21361	0	0.162358	0.626666	0.175729	0.214929	0.661423	0.342792	0.970831	0.402518	0.434799	HSC_only
Dus2	0.102026	0.0573001	0.0391254	0.0979524	0.156897	0.171341	0.0498518	0.17689	0.128318	0.191783	0.0851277	0.111655	0.0647632	0.104088	0.140013	0	0.0114883	0.201175	0.130751	0.194122	0.114525	0	0.036472	0.115493	0.16004	HSC_only
Dus3l	0.165014	0.0862793	0.182793	0.161272	0.14735	0.162522	0.171083	0.173053	0.173997	0.14177	0.157483	0.152781	0.160846	0.16658	0.150262	0	0.141118	0.185718	0.176589	0.151614	0.134677	0.687464	0.120129	0.168247	0.137457	HSC_only
Dusp16	0.0788591	0.0598622	0.168203	0.0453674	0.0646988	0.0648805	0.0166534	0.0787053	0.0437631	0.0536413	0.155158	0.0759618	0.0892454	0.0664586	0.0816453	0	0.0375483	0.0611192	0.0586067	0.0698946	0.0190374	0	0.163326	0.0848035	0.0830109	HSC_only
Dusp3	0.098697	0.0706178	0.0987887	0.110668	0.0925815	0.0884074	0.0922057	0.0873792	0.0979805	0.0907273	0.16856	0.182399	0.140588	0.102108	0.0945707	0	0.109431	0.0942863	0.109564	0.0691603	0.0735938	0	0.0450087	0.0982785	0.107306	HSC_only
Dusp4	0.0670522	0.0587831	0.0425184	0.0413321	0.0519753	0.103937	0.0877294	0.0766229	0.0610425	0.0533579	0.0630599	0.0437052	0.0320848	0.0701167	0.0936681	0	0.0549366	0.0291327	0.0563579	0.0352537	0.0875672	0	0.0282814	0.0393365	0.0494806	HSC_only
Dut	0.413746	1.54755	0.314594	0.631512	0.37281	0.455548	1.63793	0.294696	0.828837	0.437054	0.330664	0.381289	0.611766	0.447865	0.443237	0.953743	1.62853	0.342332	0.753788	0.412097	0.362511	0.949168	0.337055	0.61464	0.438999	HSC_only
Dvl2	0.0768784	0.192417	0.158744	0.0904027	0.0779412	0.0957667	0.157022	0.127371	0.113377	0.103323	0.100825	0.0513639	0.0582761	0.141751	0.103512	0	0.137668	0.0570259	0.106426	0.116882	0.0790933	0	0.0532537	0.0945578	0.101792	HSC_only
Dync1li1	0.170483	0.155922	0.22366	0.176427	0.166522	0.14855	0.15903	0.186939	0.156815	0.143295	0.277822	0.24302	0.269165	0.261132	0.145724	0.953743	0.212903	0.0674997	0.169302	0.152966	0.206286	0	0.172464	0.171648	0.178645	HSC_only
Dynlt3	0.407118	0.515253	0.389514	0.420449	0.426124	0.473724	0.47868	0.401322	0.455378	0.456747	0.708111	0.659915	0.655171	0.819637	0.489485	0	0.406406	0.422089	0.477122	0.489813	0.518638	0.342792	0.438952	0.48511	0.527405	HSC_only
E2f1	0.028772	0.27443	0.0345868	0.0840587	0.0178456	0.0298493	0.344295	0.0518454	0.136991	0.0299377	0.0406637	0.0167279	0.125337	0.0564862	0.0343585	0	0.274327	0	0.118267	0.032518	0.0335985	0.764247	0.0256322	0.0776848	0.0305051	HSC_only
E2f3	0.0965157	0.332483	0.0458075	0.123996	0.0796673	0.0967091	0.282669	0.0835061	0.138651	0.0770921	0.0726183	0.0608689	0.104948	0.0575264	0.0858841	0	0.246676	0.0682136	0.123257	0.0836864	0.149784	0.559788	0.109245	0.141802	0.0726304	HSC_only
Ebi3	0.381749	0.15032	0.443523	0.290394	0.462462	0.455656	0.25007	0.488061	0.36352	0.499974	0.535004	0.458113	0.422224	0.6081	0.430351	0	0.200424	0.508701	0.341092	0.474498	0.427304	0	0.538705	0.515091	0.58191	HSC_only
Ecm1	0.0516014	0.0313408	0.0871973	0.0514763	0.0321919	0.0433446	0.0517562	0.0201868	0.0605347	0.0447467	0.0313716	0.0467023	0.0336863	0	0.0382265	0	0.083006	0.0649725	0.0515002	0.0451438	0.0415511	0	0.0305333	0.0517516	0.047252	HSC_only
Edem2	0.383742	0.260208	0.42969	0.388185	0.396144	0.450254	0.469141	0.387256	0.433721	0.446452	0.427468	0.364268	0.435838	0.421045	0.460875	0.953743	0.586117	0.521343	0.453476	0.436342	0.386257	0.550793	0.32152	0.398128	0.384346	HSC_only
Eed	0.252717	0.467945	0.204293	0.300834	0.26516	0.221209	0.519516	0.0707042	0.273059	0.218312	0.198142	0.193098	0.181592	0.0675322	0.236401	1.43289	0.358628	0.277929	0.285729	0.206597	0.19661	0.354456	0.279551	0.325687	0.223265	HSC_only
Eef1a1	4.59415	4.33175	4.53783	4.56396	4.6223	4.65256	4.4499	4.60126	4.65699	4.67798	4.62386	4.75184	4.65095	4.71482	4.64505	4.62016	4.44114	4.62596	4.66326	4.67835	4.56581	4.45922	4.49113	4.6378	4.65258	HSC_only
Efna1	0.0651021	0.0436857	0	0.0465435	0.0838379	0.0719232	0.0242516	0.0264115	0.0621859	0.106095	0.0171152	0.00987666	0.0333104	0	0.0485273	0	0.0229523	0.0131995	0.0552399	0.0909044	0	0	0.00933292	0.0331623	0.0802959	HSC_only
Egr1	1.46643	0.595761	1.16249	0.849967	0.982451	1.73551	0.900326	1.43111	1.1445	1.26907	1.79728	1.02715	1.19507	1.18253	1.69396	0.953743	1.13915	1.14679	1.04444	1.11392	1.87585	0.208001	1.23514	1.44652	1.51319	HSC_only
Eif1a	0.732532	0.635961	0.974582	0.828618	0.64888	0.485974	0.565321	0.59594	0.602252	0.434622	0.68871	0.707971	0.758586	0.506109	0.499374	0.953743	0.503577	0.725333	0.567968	0.402542	0.819204	0.342792	1.28915	0.817657	0.59055	HSC_only
Eif2b1	0.178237	0.357445	0.206032	0.201388	0.178052	0.160266	0.272088	0.271517	0.195626	0.156907	0.130771	0.148461	0.17265	0.227488	0.165384	0.953743	0.30491	0.12493	0.192548	0.166051	0.172172	0	0.115839	0.18034	0.14075	HSC_only
Eif2b2	0.228284	0.34323	0.335098	0.268065	0.220867	0.214905	0.334125	0.221626	0.241284	0.217018	0.230741	0.163204	0.237327	0.150731	0.2271	0	0.380959	0.141437	0.233918	0.216821	0.218391	0	0.166516	0.228364	0.236447	HSC_only
Eif2b4	0.1437	0.201012	0.149043	0.185845	0.134018	0.118301	0.216734	0.134118	0.142396	0.107449	0.112548	0.0595267	0.0961642	0	0.0991913	0.953743	0.139228	0.11049	0.123844	0.113779	0.0521651	0	0.0645387	0.147559	0.139977	HSC_only
Eif2d	0.175797	0.245004	0.0533529	0.174416	0.149719	0.166619	0.236286	0.12336	0.170184	0.154749	0.259742	0.250779	0.230578	0.148836	0.134386	0	0.223244	0.0886157	0.161913	0.17339	0.157523	0.354456	0.235885	0.162393	0.177982	HSC_only
Eif2s3y	0.218253	0.215079	0.226988	0.165646	0.176649	0.215113	0.175146	0.197293	0.19808	0.214532	0.482905	0.477568	0.546354	0.271122	0.296295	0	0.207408	0.203932	0.247608	0.277317	0.331414	0	0.148409	0.206622	0.191422	HSC_only
Eif3d	1.02283	1.14212	1.14371	1.23364	0.968205	0.91504	1.03307	0.994145	1.06664	0.880283	0.909947	0.929384	1.05372	0.777257	0.91531	0.953743	1.18294	0.892786	1.05349	0.859303	0.741365	0.559788	0.790785	0.951046	0.763711	HSC_only
Eif3g	0.746546	0.69456	0.80463	0.959054	0.667491	0.591123	0.748771	0.51677	0.749666	0.566128	0.510534	0.619794	0.662622	0.502949	0.60072	0.953743	0.77257	0.639214	0.733184	0.54433	0.539394	0.697248	0.546115	0.682554	0.479359	HSC_only
Eif3j1	0.39077	0.585933	0.234107	0.505189	0.327755	0.295071	0.373871	0.419295	0.368862	0.235165	0.353631	0.341032	0.587373	0.295343	0.232939	0.953743	0.378869	0.286638	0.28515	0.191782	0.471945	1.10405	0.446173	0.516803	0.362156	HSC_only
Eif3l	0.63017	0.993833	0.626934	0.748976	0.604306	0.621663	0.903651	0.576164	0.735714	0.623816	0.551107	0.70659	0.640323	0.738345	0.631683	1.43289	0.771031	0.518871	0.701599	0.619807	0.530708	1.16006	0.5097	0.714395	0.564547	HSC_only
Eif4a1	2.05835	2.10655	2.13422	2.37004	1.97689	1.70133	1.9938	1.50938	2.04344	1.55863	1.60033	1.79942	2.09687	1.38391	1.64945	1.75548	1.99825	1.61455	2.03027	1.53238	1.54014	1.39623	1.65464	1.92364	1.44186	HSC_only
Eif4b	1.08047	1.02245	0.958086	1.0095	1.05201	1.0105	0.985976	0.909117	1.02605	1.04441	1.151	1.09377	1.11352	1.34127	1.02705	2.19467	0.983837	0.920031	1.0107	1.03669	1.11363	0.752259	0.933856	1.19146	1.18101	HSC_only
Eif5a	2.27496	2.31295	2.21505	2.66334	2.18731	2.06378	2.4326	2.22793	2.49086	1.97597	1.93519	2.24479	2.45447	1.96873	2.07775	2.19467	2.38963	2.07882	2.49458	1.98798	1.86685	2.12504	1.9445	2.22655	1.81581	HSC_only
Eif6	0.736077	1.04082	0.606214	0.922478	0.683524	0.537918	0.921405	0.618922	0.718462	0.535122	0.573912	0.525183	0.6259	0.504762	0.551687	0.953743	0.882466	0.681337	0.715293	0.567095	0.466187	0.810381	0.596088	0.633457	0.493599	HSC_only
Elavl1	0.690945	0.905927	0.772437	0.77866	0.584906	0.503434	0.863814	0.551954	0.623912	0.496799	0.68516	0.576876	0.687235	0.693217	0.561643	1.99899	0.834964	0.56833	0.631157	0.492442	0.57894	0.550793	0.598575	0.607257	0.51879	HSC_only
Elf1	1.06318	0.881576	1.00013	0.80177	0.761922	1.1253	0.948747	1.06728	0.93174	0.855438	1.26489	1.07153	1.10425	1.18198	1.22758	1.75548	1.02143	1.06314	0.986802	0.890516	1.41311	1.32091	1.1746	1.08009	1.01667	HSC_only
Elk4	0.385432	0.275923	0.37205	0.273641	0.317703	0.39664	0.253131	0.369435	0.298078	0.296956	0.445976	0.424224	0.447372	0.285947	0.38292	0.953743	0.34559	0.363162	0.326778	0.331885	0.504586	0	0.374909	0.331415	0.372601	HSC_only
Elp3	0.200957	0.157846	0.0786689	0.24061	0.203706	0.184354	0.271727	0.232002	0.226455	0.189307	0.260693	0.165815	0.214557	0.0991958	0.187725	0	0.262715	0.115233	0.231615	0.187868	0.228328	0.208001	0.194042	0.215911	0.195839	HSC_only
Emc10	0.577743	0.767206	0.550306	0.681098	0.580955	0.631661	0.728652	0.499652	0.708074	0.644982	0.639166	0.625064	0.731944	0.487779	0.614805	1.43289	0.7162	0.64757	0.731489	0.603525	0.673846	0.467589	0.521013	0.654564	0.658893	HSC_only
Emilin1	0.283315	0.397789	0.214451	0.36026	0.332262	0.334015	0.427453	0.226254	0.376172	0.33617	0.334219	0.302857	0.409937	0.227867	0.323821	0	0.441973	0.26351	0.370893	0.335063	0.354897	0.342792	0.197019	0.374333	0.304158	HSC_only
Enah	0.0823128	0.0513241	0.197761	0.0785773	0.0792875	0.0217826	0.0337774	0.0233568	0.0329392	0.0303574	0.0501091	0.0964969	0.0383288	0	0.0282889	0	0.00968798	0.0239582	0.0285851	0.0332807	0.0201569	0	0.131985	0.042785	0.0553317	HSC_only
Enpp4	0.141047	0.175389	0.50751	0.11822	0.158857	0.153368	0.0989211	0.439835	0.144037	0.160523	0.24664	0.231615	0.176215	0.227017	0.156112	0	0.138307	0.414921	0.139218	0.16961	0.319163	0	0.767972	0.319876	0.266834	HSC_only
Entpd1	0.0431986	0.0124373	0.189464	0.0404117	0.0584375	0.0507026	0.0335148	0.0718172	0.0407857	0.0543122	0.0966095	0.0545801	0.0789161	0.0347822	0.0481963	0	0.0931908	0.0778572	0.038668	0.0454337	0.116998	0	0.138112	0.0781552	0.0770741	HSC_only
Epb41l4aos	0.555302	0.36975	0.57417	0.544847	0.568996	0.606132	0.394957	0.615767	0.566261	0.565961	0.727459	0.742319	0.559867	0.727656	0.606432	0.953743	0.335792	0.559526	0.555377	0.56839	0.61252	1.32091	0.62354	0.623812	0.672592	HSC_only
Epop	0.0637547	0.0951718	0.132411	0.115746	0.0493571	0.0323694	0.0321705	0.0549862	0.0436945	0.0220311	0.0586572	0.0938997	0.107502	0	0.0329926	0	0.0406312	0.0353193	0.0476336	0.0277093	0	0	0.0804561	0.0493437	0.0175907	HSC_only
Erbin	0.309302	0.289352	0.351867	0.295766	0.277341	0.329496	0.301728	0.286578	0.283304	0.293293	0.504385	0.384502	0.430713	0.379056	0.329709	0.953743	0.334466	0.273371	0.294111	0.295347	0.370357	0.550793	0.385623	0.401051	0.379428	HSC_only
Erg	0.238971	0.0919499	0.240505	0.200702	0.247415	0.243554	0.269807	0.285726	0.223324	0.226551	0.178728	0.154383	0.238788	0.229866	0.251488	0.953743	0.20058	0.225303	0.210816	0.210836	0.325077	0.208001	0.224892	0.238802	0.254982	HSC_only
Eri1	0.200169	0.675134	0.26202	0.228565	0.188311	0.22271	0.471449	0.201319	0.269713	0.194454	0.182886	0.166614	0.182713	0.117366	0.211557	0	0.547566	0.134772	0.263112	0.186747	0.353196	0	0.277733	0.28739	0.268936	HSC_only
Eri3	0.193476	0.321772	0.218632	0.243623	0.175147	0.190738	0.352092	0.0998718	0.233378	0.174187	0.194805	0.184956	0.233914	0.132862	0.173816	0	0.329489	0.096049	0.231827	0.182221	0.208192	1.01185	0.188826	0.238662	0.191582	HSC_only
Ern1	0.136844	0.0389702	0.0857304	0.108806	0.123288	0.162263	0.0738276	0.190641	0.13161	0.132522	0.223753	0.185304	0.196852	0.109671	0.15169	0	0.0565783	0.153123	0.127126	0.157737	0.172111	0.550793	0.138441	0.15881	0.192716	HSC_only
Erp29	0.672004	0.971093	0.604612	0.784549	0.653777	0.614174	1.00762	0.471704	0.719025	0.60224	0.536338	0.616249	0.784789	0.391178	0.658541	0	1.02617	0.647209	0.736038	0.61124	0.637825	0.90258	0.535802	0.664014	0.563538	HSC_only
Esyt1	0.243184	0.384515	0.0345868	0.287759	0.193796	0.184521	0.306717	0.146215	0.237012	0.15001	0.241021	0.24404	0.230849	0.334698	0.193117	0	0.356008	0.132887	0.216687	0.163022	0.276837	0	0.338562	0.217599	0.247	HSC_only
Etfa	0.410553	0.56675	0.552557	0.436685	0.333054	0.366169	0.710421	0.283996	0.430237	0.346768	0.308733	0.320805	0.342925	0.249026	0.372312	0.953743	0.691768	0.447842	0.445175	0.35451	0.280431	0.752259	0.410102	0.412931	0.327765	HSC_only
Ets2	0.104445	0.14098	0.0335076	0.0961157	0.111464	0.0910522	0.0365015	0.170835	0.0974553	0.0904904	0.196429	0.189548	0.143581	0.190963	0.0892383	0	0.112655	0.101607	0.089789	0.101765	0.103862	0	0.226773	0.137081	0.143202	HSC_only
Eva1b	0.354894	0.221816	0.222781	0.290956	0.390637	0.409768	0.223614	0.357521	0.325885	0.444134	0.36282	0.56695	0.413606	0.742037	0.401434	0	0.20614	0.416926	0.331875	0.440412	0.358171	0	0.20343	0.275662	0.387854	HSC_only
Exoc5	0.173578	0.207063	0.257957	0.176006	0.152334	0.104167	0.140665	0.0944773	0.148004	0.114556	0.17457	0.196091	0.291963	0.153305	0.122445	0	0.140614	0.188332	0.13494	0.113852	0.206988	0	0.109349	0.209364	0.132138	HSC_only
Exoc6b	0.18423	0.0739094	0.22408	0.153831	0.190649	0.184337	0.117243	0.14729	0.155728	0.201146	0.287612	0.224511	0.198201	0.27693	0.20681	0	0.102572	0.279818	0.160051	0.185088	0.152815	0	0.161322	0.201185	0.243267	HSC_only
Exosc2	0.217591	0.315679	0.255469	0.279052	0.198982	0.149861	0.32961	0.151624	0.248918	0.163077	0.238438	0.215298	0.213127	0.197526	0.140958	0	0.26598	0.101261	0.224272	0.158556	0.15131	0	0.1714	0.198202	0.178209	HSC_only
Exosc4	0.32896	0.377467	0.147934	0.422132	0.314712	0.241785	0.314505	0.269614	0.344135	0.275669	0.239091	0.307597	0.337549	0.301916	0.256795	0	0.228268	0.316442	0.32356	0.272394	0.302832	0	0.197381	0.311791	0.289443	HSC_only
Exosc5	0.55217	0.745054	0.403907	0.705887	0.493938	0.452698	0.732697	0.286255	0.694493	0.429195	0.347861	0.3251	0.579874	0.244915	0.469262	0	0.653689	0.459149	0.728908	0.445195	0.364774	0.559788	0.349168	0.577171	0.408476	HSC_only
Exosc8	0.350686	0.837856	0.322184	0.465774	0.371445	0.285037	0.792384	0.384614	0.427472	0.285936	0.29412	0.289113	0.388463	0.116102	0.298718	0.953743	0.776009	0.212036	0.418277	0.28646	0.318657	0.467589	0.268869	0.36544	0.27154	HSC_only
Eya2	0.159699	0.0666411	0.0425184	0.134293	0.185794	0.285459	0.166312	0.239011	0.243611	0.306215	0.375256	0.374168	0.301515	0.35401	0.286116	0	0.124085	0.30975	0.231243	0.31122	0.340839	0.752259	0.195759	0.288324	0.384705	HSC_only
Ezh2	0.192757	0.981438	0.108218	0.227053	0.138889	0.172026	1.00216	0.221769	0.265763	0.146406	0.147748	0.0864194	0.235905	0.0298939	0.164855	0	0.958515	0.202007	0.244515	0.131473	0.205638	1.04772	0.283969	0.23329	0.128497	HSC_only
F11r	0.334663	0.365778	0.350586	0.31467	0.347695	0.33677	0.402473	0.516908	0.310359	0.388632	0.481338	0.447529	0.346006	0.528841	0.34669	0	0.29949	0.49143	0.317101	0.385127	0.44856	0.544258	0.862276	0.415923	0.465645	HSC_only
Fam103a1	0.41603	0.348983	0.494843	0.355417	0.365356	0.461975	0.396841	0.287102	0.397189	0.388956	0.57566	0.466083	0.500781	0.551644	0.463118	0	0.500372	0.486892	0.429481	0.404253	0.58695	0.810381	0.38539	0.479	0.50158	HSC_only
Fam118a	0.0654486	0.0351958	0.127735	0.08439	0.0614828	0.0743098	0.0868055	0.0607733	0.0628515	0.0641635	0.0798078	0.107923	0.129769	0.065513	0.0710151	0	0.0833935	0.0609871	0.0672607	0.0647762	0.058556	0	0.0366579	0.0893858	0.0934946	HSC_only
Fam118b	0.0677574	0.100159	0.158479	0.0890819	0.0817474	0.0499673	0.0465547	0.0784595	0.0640761	0.0443055	0.02746	0.0258331	0.0510679	0.0347822	0.0415188	0	0.11439	0.0931088	0.0471717	0.0474455	0.0314872	0	0.072328	0.0663694	0.0590903	HSC_only
Fam173b	0.100349	0.16948	0.12894	0.119814	0.0946257	0.098751	0.187696	0.0469285	0.119371	0.090851	0.108701	0.0566682	0.0748822	0.0335932	0.115438	0	0.094177	0.131493	0.128701	0.0991828	0.118295	0	0.088799	0.136053	0.0962579	HSC_only
Fam174a	0.504949	0.491622	0.428057	0.466298	0.576456	0.521198	0.48932	0.792877	0.485592	0.556971	0.694339	0.659382	0.589705	0.555781	0.519536	0	0.446171	0.544029	0.488598	0.542927	0.593364	0	0.552135	0.557273	0.588806	HSC_only
Fam181b	0.0672056	0.0220854	0	0.0501845	0.043616	0.0738714	0.0447348	0	0.0569739	0.0697982	0.0447073	0.0417206	0.0265285	0	0.0775338	0	0.0876355	0	0.0545281	0.0630893	0.0378224	0	0.0211333	0.0508582	0.0496606	HSC_only
Fam189b	0.0524289	0.0321378	0	0.0513081	0.0631212	0.0725418	0.064991	0.0800974	0.0720752	0.0887153	0.10065	0.0882372	0.0717146	0.0519469	0.0859121	0.953743	0.0246705	0.117934	0.0654658	0.0874239	0.084141	0	0.0610187	0.074542	0.0919166	HSC_only
Fam241a	0.115614	0.24562	0.148965	0.109665	0.104537	0.0970349	0.161884	0.307754	0.104009	0.114423	0.259172	0.220983	0.142259	0.230258	0.105128	0	0.188972	0.188821	0.0849848	0.102277	0.202746	0	0.577295	0.180796	0.134213	HSC_only
Fam3c	0.210693	0.193808	0.251622	0.196448	0.160108	0.161174	0.180653	0.195774	0.196483	0.154337	0.254884	0.24044	0.219799	0.28436	0.162437	0	0.181018	0.0604217	0.187465	0.160537	0.173204	0.208001	0.218962	0.233087	0.173786	HSC_only
Fam43a	0.235839	0.157616	0.174711	0.151543	0.247536	0.284585	0.16845	0.203443	0.222038	0.29951	0.413797	0.354986	0.312465	0.498459	0.318611	0	0.161043	0.164858	0.209923	0.292393	0.385109	0.208001	0.19146	0.261248	0.430497	HSC_only
Fam50a	0.239813	0.401947	0.325094	0.277534	0.215782	0.221896	0.295317	0.183901	0.257863	0.204441	0.186162	0.18391	0.191118	0.187293	0.238899	1.43289	0.292769	0.29326	0.267817	0.240087	0.218447	0	0.195857	0.258023	0.20817	HSC_only
Fam76a	0.259051	0.198697	0.399601	0.219946	0.244473	0.251363	0.260853	0.264394	0.233458	0.230278	0.409419	0.428356	0.352823	0.207102	0.237043	0	0.294151	0.205866	0.22237	0.256717	0.233202	0	0.280863	0.194948	0.269869	HSC_only
Fam8a1	0.125867	0.21901	0.0634091	0.0935734	0.129099	0.153885	0.124201	0.0625311	0.110236	0.12456	0.216755	0.213916	0.120787	0.152905	0.144366	0	0.123868	0.107569	0.106344	0.131486	0.141072	0.342792	0.0871926	0.142136	0.128314	HSC_only
Fam91a1	0.132219	0.223283	0.112081	0.116745	0.106909	0.103996	0.105777	0.131549	0.108351	0.0964446	0.166181	0.199512	0.151044	0.166217	0.115273	0	0.102874	0.0700269	0.105121	0.0974337	0.155949	0	0.165209	0.154056	0.125556	HSC_only
Fancf	0.0604595	0.0615975	0.0311127	0.0807617	0.0499389	0.040275	0.0574642	0.0619833	0.0692161	0.045973	0.0649981	0.0989024	0.115801	0.0683754	0.0561757	0	0.0750625	0.053084	0.0740316	0.0557501	0.0448064	0	0.013705	0.0938556	0.0222224	HSC_only
Farsa	0.447513	0.564673	0.6188	0.573357	0.373325	0.328957	0.456344	0.357365	0.43902	0.346529	0.302089	0.324797	0.469741	0.230956	0.317351	0.953743	0.503609	0.352439	0.453571	0.319122	0.299634	0.342792	0.306275	0.481359	0.312818	HSC_only
Farsb	0.332226	0.413261	0.355569	0.464162	0.302412	0.218002	0.297921	0.198078	0.311958	0.216727	0.210595	0.199619	0.234351	0.194791	0.238474	0	0.303789	0.23456	0.318549	0.231764	0.23289	0.550793	0.3059	0.336249	0.276101	HSC_only
Fbl	1.06085	1.17416	1.03095	1.3555	0.949619	0.903787	1.23709	0.920015	1.22058	0.795896	0.783045	0.89916	1.22927	0.635713	0.897666	1.43289	1.19061	0.828315	1.23377	0.807029	0.892233	0.865208	0.796685	1.16741	0.720372	HSC_only
Fbrs	0.173729	0.194207	0.083692	0.171864	0.207023	0.183301	0.0954902	0.238298	0.153129	0.155326	0.287852	0.202066	0.225936	0.121587	0.183187	0	0.0991762	0.149985	0.170191	0.167857	0.173836	0.208001	0.173047	0.182808	0.200115	HSC_only
Fbxl12	0.144075	0.120933	0.298748	0.123421	0.171719	0.199294	0.0855467	0.254497	0.135407	0.190477	0.267809	0.224832	0.192707	0.380929	0.18352	0.953743	0.0585738	0.167037	0.161383	0.188769	0.174057	0	0.115318	0.162311	0.213972	HSC_only
Fbxl14	0.276785	0.390244	0.234369	0.333131	0.293613	0.306988	0.418462	0.371049	0.303434	0.274042	0.442914	0.430323	0.481928	0.531439	0.343537	0.953743	0.381346	0.435249	0.327248	0.254711	0.35595	0.550793	0.222428	0.386074	0.408381	HSC_only
Fbxl17	0.138059	0.0462274	0.0866029	0.135598	0.162035	0.135919	0.136308	0.0855339	0.147497	0.12937	0.189985	0.233972	0.235832	0.12918	0.15869	0	0.152048	0.208061	0.136186	0.144287	0.118254	0	0.175879	0.195186	0.159836	HSC_only
Fbxo31	0.117596	0.0690016	0.174175	0.147486	0.0995521	0.0974916	0.0763828	0.0524702	0.117131	0.0964391	0.062477	0.0857821	0.107704	0.100795	0.0894938	0	0.0859944	0.0955663	0.124919	0.106358	0.185381	0.208001	0.0721162	0.128033	0.0708493	HSC_only
Fbxo44	0.0610205	0.021294	0.0440821	0.0721606	0.0380965	0.059125	0.0525291	0	0.0499458	0.0559057	0.0532961	0.123123	0.0761658	0.0659607	0.052946	0	0.0727832	0.0516478	0.0451604	0.0606356	0.0719993	0	0.0277937	0.0474745	0.0416963	HSC_only
Fbxo7	0.16509	0.190721	0.227424	0.193016	0.156046	0.165007	0.226756	0.128347	0.19249	0.171756	0.12398	0.120358	0.13844	0.247675	0.161803	0	0.236776	0.182391	0.17971	0.174237	0.12277	0	0.159316	0.189732	0.150774	HSC_only
Fbxo8	0.112055	0.0910397	0.0459124	0.105253	0.107825	0.128124	0.148976	0.150778	0.100572	0.127537	0.202251	0.14429	0.107267	0.160727	0.120281	0	0.200275	0.085837	0.10807	0.107811	0.093083	0.342792	0.0993794	0.149357	0.145736	HSC_only
Fbxw7	0.18884	0.190865	0.320449	0.197946	0.143487	0.131277	0.182733	0.261632	0.14894	0.128056	0.166866	0.210704	0.206762	0.220745	0.146128	0	0.191594	0.205505	0.154989	0.127894	0.126594	0	0.186007	0.17807	0.171611	HSC_only
Fcer1g	0.437704	0.409007	0.383012	0.365091	0.497204	0.454472	0.194976	0.453255	0.355289	0.476222	0.542129	0.496889	0.303629	0.604246	0.401197	0	0.214543	0.283789	0.298764	0.42282	0.468567	0	0.396804	0.366349	0.455398	HSC_only
Fcho2	0.424315	0.312776	0.675359	0.309233	0.473606	0.521621	0.330088	0.540724	0.376031	0.519168	0.661039	0.500389	0.406376	0.630431	0.502138	0	0.360925	0.596989	0.40444	0.54401	0.710768	0.697248	0.556502	0.470672	0.67354	HSC_only
Fchsd1	0.0426085	0.0117064	0	0.0273118	0.0460226	0.0321025	0.0398747	0.0353623	0.035517	0.0361475	0.0614434	0.106982	0.0367327	0.0723445	0.0373528	0	0.0421955	0.0393744	0.0518549	0.0410105	0.0290919	0.342792	0.02865	0.0339206	0.0643202	HSC_only
Fdxr	0.0761565	0.149371	0.139916	0.130399	0.0841419	0.120887	0.232846	0.0547882	0.141941	0.118382	0.0937638	0.0446594	0.0979535	0.137539	0.114218	0	0.175158	0.203388	0.146512	0.107787	0.0727091	0	0.0673264	0.157933	0.118268	HSC_only
Fen1	0.137533	0.725888	0.110411	0.223263	0.0969203	0.114501	0.677576	0.111288	0.227355	0.104307	0.111652	0.106658	0.150849	0.123243	0.117317	0	0.7284	0.115654	0.198197	0.0882761	0.115547	0.467589	0.109996	0.13455	0.0760459	HSC_only
Fgd3	0.0440529	0.0447487	0.087473	0.0375156	0.0409162	0.0512676	0.0303698	0.0641083	0.0543047	0.0700485	0.0385136	0.0242542	0.0257347	0	0.0590965	0	0	0.0557803	0.0526432	0.0627234	0.0426932	0	0.0182789	0.0587171	0.0489493	HSC_only
Fh1	0.297096	0.545214	0.16159	0.437888	0.290346	0.30933	0.57647	0.371088	0.396682	0.297739	0.227479	0.281794	0.374546	0.202776	0.277029	0.953743	0.506342	0.157233	0.411806	0.289185	0.280149	0.544258	0.321759	0.391612	0.241837	HSC_only
Fhod1	0.0371919	0.0661899	0	0.0379452	0.0422064	0.0780062	0.0739031	0.0445806	0.0602508	0.0734627	0.0288782	0.0173972	0.038676	0	0.063614	0	0.109492	0.0562866	0.064633	0.0659536	0.0962561	0.550793	0.0249032	0.0810754	0.0710995	HSC_only
Fkbp11	0.221613	0.214747	0.248873	0.470768	0.162932	0.118266	0.221772	0.146201	0.29687	0.113647	0.116016	0.151256	0.238292	0	0.135932	0	0.175265	0.139706	0.295693	0.122882	0.0877028	0	0.117325	0.240995	0.0698375	HSC_only
Fkbp3	0.920232	1.20876	0.894675	1.07286	0.917131	1.00387	1.25558	1.10581	1.16872	0.991919	0.946636	0.940768	1.16736	0.573853	0.963199	0.953743	1.21126	0.906934	1.12571	0.932301	1.0648	0.704924	0.894458	1.11788	0.902819	HSC_only
Fkbp4	0.866133	1.02014	0.714428	1.06438	0.73614	0.777804	1.13177	0.691757	1.03517	0.737233	0.665756	0.75798	1.14235	0.679837	0.763955	1.75548	1.12092	0.73454	1.05482	0.75065	0.5257	0.354456	0.564151	0.924234	0.713695	HSC_only
Fkrp	0.147407	0.173325	0.14721	0.144215	0.142152	0.138877	0.094299	0.137746	0.132875	0.132423	0.218824	0.187556	0.147362	0.157045	0.135551	0	0.145237	0.120295	0.144279	0.127315	0.0940899	0	0.127812	0.117826	0.174915	HSC_only
Flii	0.364078	0.273191	0.398924	0.326251	0.308349	0.283107	0.374177	0.284812	0.295921	0.276884	0.381194	0.379652	0.366392	0.183477	0.293849	0	0.207757	0.371419	0.307778	0.309552	0.276501	0.354456	0.301477	0.373913	0.340447	HSC_only
Flot2	0.185601	0.174642	0.0823027	0.180141	0.160207	0.113137	0.18439	0.129635	0.0957742	0.117272	0.143387	0.146206	0.155742	0.138233	0.0930133	0	0.168983	0.126782	0.100941	0.109988	0.081629	0	0.151748	0.158584	0.101404	HSC_only
Fmc1	0.394291	0.590237	0.362541	0.523267	0.410766	0.404988	0.788195	0.435763	0.530201	0.414597	0.405079	0.406695	0.474917	0.275403	0.374503	0	0.577739	0.399412	0.504168	0.364479	0.410968	0.898713	0.369478	0.511133	0.417241	HSC_only
Fmo5	0.0637699	0.0408113	0.0415605	0.0489558	0.094657	0.121719	0.126108	0.0870843	0.0828369	0.150772	0.248485	0.13084	0.135546	0.178114	0.118136	0	0.0636106	0.0446166	0.0879631	0.14812	0.211089	0	0.128408	0.107413	0.164119	HSC_only
Fnbp1	0.367737	0.381362	0.292141	0.353831	0.3696	0.434784	0.423564	0.455862	0.402458	0.414183	0.61816	0.504831	0.568606	0.598449	0.409821	0	0.344127	0.348074	0.395312	0.412599	0.444821	0	0.402288	0.535859	0.467464	HSC_only
Foxa3	0.0823843	0.0682336	0	0.0575802	0.0940896	0.0926507	0.0546535	0.0389816	0.0805772	0.128112	0.0663056	0.0354085	0.0349399	0.0999424	0.106506	0	0.0665723	0.176089	0.0795124	0.118563	0.100265	0	0.0444999	0.10978	0.135375	HSC_only
Foxp1	0.79318	0.668393	0.679469	0.656413	0.773921	0.974114	0.735976	0.69115	0.815578	0.926491	1.0345	1.01297	0.992107	1.26574	0.985831	0	0.559	0.913161	0.843154	0.950022	1.24138	0.697248	0.930353	0.993864	1.17198	HSC_only
Fra10ac1	0.183775	0.235437	0.164788	0.243786	0.163473	0.175608	0.216985	0.157101	0.21881	0.159152	0.166131	0.11356	0.21892	0.0329244	0.160559	0	0.145643	0.0998687	0.220441	0.166018	0.172439	0.208001	0.13691	0.236195	0.186075	HSC_only
Frmd4a	0.157527	0.177067	0.149638	0.145662	0.134346	0.179722	0.0920437	0.311263	0.154284	0.139678	0.116948	0.104998	0.0803912	0.204661	0.144317	0	0.134374	0.169703	0.141254	0.14144	0.292708	0.550793	0.25937	0.208559	0.182738	HSC_only
Frs2	0.103386	0.147186	0.0770251	0.0966606	0.121691	0.12484	0.113723	0.129558	0.0870887	0.124069	0.166252	0.117168	0.152752	0.0683446	0.127921	0	0.0941589	0.180502	0.110769	0.129705	0.119427	0.544258	0.107609	0.114461	0.160854	HSC_only
Fstl1	0.127701	0.0808227	0.212967	0.0938121	0.128883	0.168124	0.145153	0.142895	0.117153	0.168106	0.236201	0.241079	0.196127	0.289417	0.171352	0	0.215177	0.16865	0.13721	0.175388	0.157865	0.697248	0.188305	0.192874	0.246146	HSC_only
Ftl1	3.19751	2.84703	3.07287	3.09098	3.19207	3.18895	2.72999	3.1571	3.0816	3.16096	2.98508	3.10576	2.98561	3.08635	3.23376	3.54106	2.77282	3.18242	3.1337	3.21678	2.9174	2.41514	2.69949	2.9375	2.9861	HSC_only
Ftsj3	0.407636	0.462768	0.549186	0.60686	0.339776	0.214573	0.351375	0.0883609	0.356244	0.180349	0.161669	0.218058	0.385227	0.161885	0.215871	0	0.327342	0.246963	0.349639	0.185572	0.255094	0.208001	0.244747	0.35383	0.174728	HSC_only
Fubp3	0.123182	0.107438	0.0345868	0.114045	0.110974	0.122188	0.0907175	0.102014	0.128565	0.123268	0.214543	0.175	0.191969	0.212479	0.116511	0	0.0757052	0.0526843	0.113727	0.127709	0.104824	0.550793	0.117621	0.1688	0.140696	HSC_only
Fuca2	0.154	0.220327	0.0440821	0.126433	0.142442	0.190294	0.26823	0.172468	0.168174	0.188995	0.138612	0.155251	0.166634	0.109123	0.179503	0	0.209644	0.124642	0.154727	0.189742	0.197733	0.354456	0.147518	0.181329	0.222637	HSC_only
Fundc2	0.631508	1.00881	0.737881	0.662959	0.614318	0.633005	0.904358	0.600356	0.709697	0.62731	0.656381	0.718432	0.695483	0.398604	0.625597	0	0.941674	0.724241	0.693157	0.620289	0.752542	0.810381	0.595577	0.675838	0.696331	HSC_only
Fuom	0.0518519	0.0596487	0.117683	0.0485971	0.0555522	0.0526861	0.157018	0.0201868	0.0657798	0.0551143	0.0359552	0.0423778	0.056093	0.0298939	0.0547737	0	0.139305	0.0788276	0.0582059	0.0546517	0.0627341	0	0.0371611	0.0357392	0.0262176	HSC_only
Fuz	0.11883	0.104129	0.14014	0.129652	0.133164	0.140826	0.140446	0.131881	0.157984	0.146876	0.175189	0.110101	0.100902	0.103401	0.14682	0	0.177106	0.162018	0.154124	0.158788	0.142606	0.208001	0.121846	0.154489	0.15734	HSC_only
Fxn	0.174432	0.36918	0.153543	0.220458	0.140798	0.167566	0.411796	0.216775	0.225664	0.139341	0.100361	0.114232	0.155506	0.136157	0.160136	0.953743	0.365284	0.188613	0.224373	0.145816	0.105079	0.208001	0.133414	0.201971	0.103734	HSC_only
Fyb	0.257348	0.307662	0.154041	0.269699	0.201268	0.202294	0.306044	0.381692	0.234557	0.185572	0.156821	0.157526	0.204382	0.105753	0.193651	0	0.171199	0.215463	0.24115	0.184645	0.239714	0.208001	0.346452	0.2377	0.208887	HSC_only
Fzd4	0.0808275	0.0445063	0.0744048	0.0506178	0.0334702	0.0686619	0.0410635	0.0770145	0.0417403	0.0422055	0.181687	0.140655	0.15345	0.143079	0.0826715	0	0.0568716	0	0.0355918	0.0307482	0.0403086	0	0.00766519	0.0161745	0.0476788	HSC_only
Fzd9	0.0545712	0.0261305	0	0.0474958	0.0274515	0.0507282	0.0286088	0.0512083	0.0301623	0.0277802	0.158198	0.172482	0.13394	0.177569	0.0664691	0.953743	0.0772283	0	0.0495523	0.0210819	0.0411695	0	0.00515266	0.0305324	0.0163961	HSC_only
Fzr1	0.172967	0.329324	0	0.169581	0.198049	0.177687	0.381183	0.130459	0.173153	0.156992	0.131158	0.119208	0.163594	0.100319	0.17528	0	0.33957	0.0591885	0.167761	0.179973	0.215199	0	0.109884	0.18889	0.161211	HSC_only
Gabarap	1.33913	1.15089	1.42039	1.2764	1.41851	1.28512	1.18547	1.23941	1.18927	1.33485	1.34517	1.37547	1.27542	1.54017	1.3078	0.953743	1.21385	1.23848	1.17506	1.36719	1.25453	1.10704	1.17201	1.2012	1.28254	HSC_only
Gabarapl2	0.70929	0.82786	0.600324	0.638843	0.731347	0.737264	0.724535	0.779562	0.643685	0.694697	0.824146	0.783346	0.779244	1.00468	0.723795	0.953743	0.828662	0.661756	0.680275	0.740391	0.725027	0.898713	0.672008	0.657065	0.765806	HSC_only
Gadd45b	0.128946	0.184779	0.172918	0.106642	0.0897894	0.203658	0.198628	0.253539	0.136101	0.0923163	0.104711	0.0663805	0.0876446	0.14171	0.208145	0	0.227393	0.241817	0.131313	0.0991796	0.297923	0.966455	0.959454	0.12675	0.124038	HSC_only
Gadd45g	0.154761	0.182357	0.253936	0.156151	0.205421	0.100241	0.0686566	0.20385	0.0749836	0.0956545	0.0655719	0.0908665	0.129866	0.29885	0.117212	0	0.196219	0.287576	0.0834944	0.12189	0.342627	0.889561	1.56569	0.3168	0.290615	HSC_only
Galk1	0.329325	0.508738	0.439788	0.438531	0.264469	0.264492	0.578065	0.248235	0.448591	0.262631	0.280779	0.264595	0.409605	0.127168	0.2772	1.75548	0.454786	0.221441	0.429948	0.246739	0.187926	0.467589	0.193563	0.316555	0.203718	HSC_only
Galnt11	0.237254	0.11457	0.28998	0.188244	0.224406	0.231855	0.10733	0.0799632	0.209038	0.209526	0.282951	0.272492	0.265373	0.255126	0.215505	0	0.17326	0.25159	0.208825	0.198447	0.318913	0.550793	0.235863	0.246583	0.234013	HSC_only
Gars	0.385912	0.626097	0.236635	0.574388	0.293143	0.243555	0.569091	0.231539	0.385672	0.229683	0.293863	0.309208	0.461798	0.311134	0.233343	0	0.457922	0.261745	0.371009	0.233257	0.258778	0.354456	0.287616	0.333444	0.209582	HSC_only
Gart	0.334794	0.47229	0.452586	0.481272	0.297603	0.243461	0.501119	0.322727	0.438701	0.228636	0.23142	0.279258	0.476281	0.0918059	0.239767	0.953743	0.478433	0.247358	0.410406	0.226013	0.178311	0	0.215569	0.427764	0.256062	HSC_only
Gatad2b	0.356631	0.410555	0.316518	0.365759	0.395159	0.331644	0.427678	0.295361	0.335914	0.328113	0.498719	0.430893	0.430545	0.512317	0.356855	0	0.492112	0.299081	0.359612	0.340971	0.374058	0.208001	0.28473	0.398626	0.442853	HSC_only
Gatb	0.0613046	0.0860533	0.0823188	0.0728611	0.0536596	0.0732852	0.09236	0.0615838	0.0836755	0.0820825	0.0673661	0.0417692	0.0910786	0.0309234	0.0594152	0	0.0356519	0.0931504	0.0830225	0.0785257	0.0700571	0	0.0668354	0.0983268	0.0587361	HSC_only
Gatc	0.105997	0.107402	0.153453	0.110331	0.0938284	0.0754764	0.130626	0.0479071	0.0924493	0.0797695	0.066306	0.0562989	0.0700251	0.060319	0.0885346	0	0.12762	0.0427597	0.103788	0.0878269	0.0739471	0.208001	0.0656264	0.0933436	0.0986394	HSC_only
Gatd1	0.310887	0.338839	0.499032	0.300666	0.325849	0.372869	0.407077	0.342732	0.375111	0.368938	0.361037	0.285528	0.278726	0.284973	0.403576	0.953743	0.34107	0.49866	0.387215	0.414591	0.381814	0	0.273782	0.393665	0.345487	HSC_only
Gatm	0.0843825	0.172796	0.115926	0.138518	0.0710544	0.0900857	0.334888	0.0807568	0.165127	0.0813989	0.111678	0.105514	0.1318	0.0347822	0.0953349	0	0.430192	0.071715	0.147997	0.0873581	0.14241	0.208001	0.115196	0.164241	0.0515909	HSC_only
Gcat	0.0575898	0.145054	0.0898896	0.103837	0.087123	0.106626	0.222094	0.093355	0.160438	0.119282	0.115789	0.135043	0.0883161	0.0284565	0.117757	0	0.112204	0.0645381	0.150186	0.116351	0.120825	0	0.0709096	0.088222	0.0776975	HSC_only
Gcc1	0.0772148	0.0654358	0.114214	0.0571978	0.0573131	0.043068	0.0610782	0	0.0442704	0.0340938	0.0741794	0.090983	0.110805	0.0589638	0.0519485	0	0.0722195	0.0610518	0.0408092	0.0443944	0.118727	0	0.217456	0.066117	0.0874185	HSC_only
Gcc2	0.257638	0.250991	0.464249	0.297718	0.28432	0.283644	0.344735	0.199087	0.294965	0.279464	0.270464	0.228795	0.302217	0.161032	0.284043	0	0.391087	0.332975	0.25954	0.293477	0.475913	0.342792	0.319305	0.350479	0.354043	HSC_only
Gcsh	0.333307	0.332406	0.240608	0.513472	0.269238	0.263857	0.481442	0.33623	0.44342	0.241163	0.223168	0.266412	0.468112	0.0304251	0.267895	1.43289	0.297774	0.320344	0.429854	0.227969	0.29148	0.208001	0.204379	0.369732	0.217462	HSC_only
Gda	0.497291	0.189018	0.135239	0.423788	0.456045	0.287549	0.188586	0.173318	0.264105	0.298461	0.35468	0.469249	0.433005	0.224838	0.256918	0	0.213312	0.289955	0.261995	0.246212	0.364529	0	0.420298	0.433237	0.429662	HSC_only
Gdf3	0.104461	0.141759	0.0649003	0.16959	0.0985953	0.107248	0.226936	0.0543896	0.179221	0.105041	0.0694869	0.121247	0.11314	0	0.141218	0	0.300845	0.0590568	0.204984	0.154604	0.163185	0.208001	0.0736423	0.17324	0.0626251	HSC_only
Gemin2	0.130042	0.271746	0.122531	0.179754	0.134075	0.11931	0.285684	0.140355	0.170507	0.122535	0.0615787	0.114219	0.149218	0.0593799	0.125644	0	0.185081	0.0980699	0.162232	0.107001	0.144865	0.208001	0.0727274	0.137127	0.156913	HSC_only
Gemin8	0.0678013	0.136412	0.0769202	0.095408	0.0507966	0.0723763	0.162558	0.121973	0.0907586	0.0642309	0.0691969	0.0550968	0.057661	0.0347822	0.0747171	0	0.126098	0.0611207	0.103862	0.0640095	0.121822	0.208001	0.0578711	0.115537	0.0675322	HSC_only
Gfer	0.289264	0.454188	0.207886	0.386136	0.261567	0.175525	0.337215	0.162902	0.271589	0.168216	0.145479	0.199107	0.236225	0.102112	0.16691	0	0.278787	0.205163	0.261648	0.168214	0.105747	0.354456	0.144677	0.225644	0.174872	HSC_only
Gga1	0.26365	0.248068	0.0900755	0.243786	0.265159	0.26544	0.26712	0.265308	0.245643	0.243793	0.414887	0.423497	0.309052	0.44041	0.261394	0	0.203403	0.218687	0.24084	0.265207	0.236118	0.544258	0.234585	0.290289	0.260558	HSC_only
Gga3	0.0801685	0.0691004	0	0.0936595	0.0723459	0.0639365	0.0691469	0.0180785	0.0589387	0.0545443	0.0291999	0.021365	0.0602693	0.15479	0.0556583	0	0.060867	0.129773	0.0720764	0.07025	0.0773701	0.342792	0.0551866	0.071807	0.0606508	HSC_only
Ghitm	0.497563	0.680722	0.626328	0.560321	0.465636	0.508507	0.57382	0.524781	0.520109	0.465566	0.640396	0.59256	0.65965	0.55692	0.518166	0	0.714923	0.542509	0.523326	0.477405	0.56595	0.354456	0.742938	0.544047	0.501513	HSC_only
Gid8	0.171948	0.311678	0.213699	0.223882	0.204019	0.150647	0.212439	0.261062	0.172335	0.16861	0.202757	0.143296	0.136829	0.124729	0.16852	0	0.210393	0.169401	0.200328	0.17303	0.13038	0	0.153912	0.194188	0.172817	HSC_only
Gimap3	0.058683	0	0	0.0282053	0.112232	0.066104	0.0121632	0.142389	0.0399908	0.112358	0.0737801	0.0513601	0.0374025	0.0593799	0.0760385	0	0.0225362	0.161258	0.0389962	0.10653	0.0939768	0	0.0985724	0.0911649	0.172337	HSC_only
Gimap5	0.509188	0.29179	0.78473	0.443844	0.560313	0.682407	0.339248	0.75899	0.601172	0.71446	0.714324	0.731378	0.652728	0.673407	0.610088	0	0.307229	0.73501	0.523529	0.658905	0.853718	0	0.779181	0.660489	0.791521	HSC_only
Gimap9	0.182772	0.157012	0.197964	0.197818	0.221798	0.227139	0.226381	0.244979	0.261205	0.287763	0.124957	0.171395	0.146825	0.109816	0.226497	0	0.27083	0.297914	0.262952	0.293139	0.321565	1.00666	0.13228	0.251757	0.247192	HSC_only
Gins2	0.0449454	0.298936	0.0689485	0.12216	0.0579551	0.0550394	0.523991	0.107499	0.165906	0.0470967	0.0167057	0.0357959	0.0981186	0.0704286	0.0415196	0	0.446184	0.0494084	0.129447	0.0524847	0.0516085	0	0.0474704	0.0863673	0.0678751	HSC_only
Gins4	0.153913	0.381832	0.126526	0.217546	0.180434	0.205128	0.454856	0.188576	0.251357	0.193817	0.127639	0.143951	0.142306	0.0284565	0.169113	0	0.46162	0.114832	0.230851	0.194318	0.189846	0	0.178087	0.212184	0.155504	HSC_only
Glipr2	0.217892	0.181861	0.38271	0.172771	0.244506	0.236568	0.144862	0.280266	0.211475	0.256996	0.324204	0.300078	0.281936	0.329424	0.247624	0	0.151072	0.324489	0.219182	0.265825	0.281299	0	0.425496	0.249122	0.278113	HSC_only
Glmn	0.153316	0.224439	0.0335076	0.176312	0.150907	0.157006	0.20946	0.14122	0.17201	0.156287	0.1044	0.119325	0.108386	0	0.155673	0	0.159671	0.111955	0.148637	0.149281	0.0916286	0.208001	0.110605	0.205306	0.190879	HSC_only
Glo1	0.513261	0.546972	0.387053	0.601689	0.521024	0.554762	0.707545	0.604263	0.606606	0.55111	0.501706	0.549123	0.572628	0.58035	0.567273	0	0.730868	0.640852	0.645093	0.567298	0.546747	0.208001	0.470522	0.609753	0.553629	HSC_only
Glod4	0.451447	0.706183	0.508222	0.503996	0.431981	0.446364	0.714424	0.360773	0.537638	0.425014	0.409857	0.434106	0.531444	0.214045	0.452945	0	0.681634	0.481701	0.51238	0.471631	0.438579	0.810381	0.412432	0.475098	0.474251	HSC_only
Glrx2	0.444053	0.278758	0.481687	0.478517	0.412016	0.401829	0.300086	0.353728	0.45827	0.376508	0.388942	0.365176	0.469474	0.246304	0.417524	0.953743	0.215467	0.402929	0.443579	0.372834	0.525913	0.208001	0.391912	0.43994	0.415034	HSC_only
Gls	0.55336	0.571972	0.473104	0.513546	0.420918	0.540371	0.471007	0.322809	0.469342	0.410532	0.611782	0.647498	0.495758	0.513924	0.531662	0.953743	0.412071	0.451271	0.46192	0.445924	0.532281	1.04192	0.559732	0.562938	0.505606	HSC_only
Glyr1	0.434612	0.418433	0.535623	0.410625	0.381461	0.377505	0.437434	0.34885	0.368838	0.351616	0.511756	0.503415	0.443336	0.386234	0.36921	1.43289	0.381901	0.330744	0.37249	0.344982	0.526513	0	0.410616	0.433915	0.417446	HSC_only
Gm11808	0.420829	0.382683	0.596773	0.429096	0.417736	0.457194	0.474185	0.413039	0.453106	0.453059	0.817879	0.805618	0.839005	0.575985	0.428851	0	0.580169	0.443047	0.452842	0.441972	0.667775	0.980396	0.688688	0.766703	0.793176	HSC_only
Gm16104	0.117615	0	0.0877187	0.106523	0.116334	0.148367	0.0429123	0.144525	0.125227	0.15114	0.204635	0.23578	0.187909	0.163997	0.125256	0.953743	0.0237285	0.0926476	0.104073	0.119021	0.101725	0	0.0899672	0.140397	0.179231	HSC_only
Gm17018	0.138292	0.223025	0.181383	0.171869	0.130482	0.159055	0.228708	0.215505	0.184107	0.15722	0.210277	0.135973	0.14574	0.0677066	0.175562	0	0.226334	0.256799	0.185383	0.15841	0.178552	0	0.124433	0.128766	0.129214	HSC_only
Gm19426	0.0347338	0.0614361	0	0.039176	0.0310616	0.0361293	0.08257	0.0391137	0.0579453	0.0320241	0.027448	0.0107005	0.0282775	0	0.0415791	0	0.126917	0.04464	0.0500029	0.0359014	0.0510964	0	0.0239744	0.0433465	0.0425413	HSC_only
Gm2000	0.408266	0.549976	0.440511	0.462572	0.421773	0.430041	0.422562	0.456448	0.499847	0.446375	0.588583	0.69944	0.702237	0.69704	0.361545	0	0.41171	0.280573	0.409161	0.385219	0.757078	1.18186	0.623732	0.676964	0.642468	HSC_only
Gm26518	0.0795787	0.0501464	0.039818	0.0546032	0.054421	0.0911326	0.0458415	0.0586182	0.0550591	0.0543337	0.110805	0.0951367	0.0983945	0.19179	0.0935927	0	0.0322888	0.0321285	0.0632625	0.0558641	0.145838	0	0.0862644	0.0715795	0.109521	HSC_only
Gm26724	0.239868	0.185677	0.274892	0.201811	0.204393	0.211367	0.106903	0.216403	0.191271	0.220563	0.270555	0.254808	0.193034	0.255104	0.208761	0	0.17492	0.231626	0.189994	0.215274	0.127471	0.342792	0.0747282	0.189606	0.196304	HSC_only
Gm26802	0.0176131	0.0112081	0.0603096	0.0239706	0.0130603	0.048288	0.0564025	0.0442278	0.0691827	0.0665046	0.0146437	0.00811925	0.0135393	0	0.0389143	0	0.0605241	0.0878996	0.0515573	0.0726114	0.0989775	0	0.234598	0.199998	0.147503	HSC_only
Gm26853	0.0828445	0.106191	0.0407954	0.0774069	0.0565826	0.0878361	0.0712691	0.184769	0.0712869	0.0582738	0.211497	0.178533	0.22997	0.157838	0.0951989	0	0.113838	0.0614849	0.0858675	0.0695874	0.158668	0	0.0677123	0.106924	0.0881494	HSC_only
Gm2a	0.262946	0.320822	0.192293	0.242004	0.303982	0.364618	0.18588	0.262044	0.297715	0.33685	0.503959	0.42052	0.335784	0.323792	0.35628	0	0.208271	0.195914	0.284481	0.379671	0.439805	0	0.27168	0.327231	0.407081	HSC_only
Gm47283	0.773487	0.960156	0.9237	0.962424	0.723883	0.637236	0.761828	0.696682	0.781381	0.610915	0.733831	0.738369	0.952645	0.571302	0.684082	0.953743	0.791848	0.479929	0.839239	0.672883	0.647793	1.15505	0.830105	0.810706	0.62319	HSC_only
Gm5914	0.0950688	0.178301	0.0688468	0.0955224	0.131225	0.133622	0.0953941	0.157952	0.129209	0.119253	0.257663	0.231447	0.21496	0.162236	0.130701	0	0.121581	0.139443	0.120593	0.107375	0.117914	0.697248	0.108278	0.154889	0.15261	HSC_only
Gm973	0.0794651	0.0545991	0.0675358	0.0521142	0.128778	0.127123	0.0177454	0.0902381	0.0700906	0.155295	0.14254	0.143079	0.112025	0.309082	0.144431	0	0.0124872	0.129953	0.0751914	0.161103	0.180413	0.342792	0.131655	0.119714	0.256195	HSC_only
Gmds	0.276308	0.429083	0.16896	0.300307	0.239481	0.226204	0.358082	0.279631	0.28484	0.221558	0.243399	0.270681	0.303064	0.0326124	0.226016	0	0.315171	0.237405	0.293115	0.229576	0.218694	0.342792	0.226912	0.270084	0.219177	HSC_only
Gmfg	0.792796	0.863161	0.691073	0.817324	0.711289	0.854982	0.957209	0.68715	0.826849	0.693563	0.70034	0.60282	0.75539	0.531644	0.826748	0	0.669793	0.457303	0.860239	0.699206	0.773215	1.24918	0.64391	0.763258	0.741488	HSC_only
Gmnn	0.0698887	0.948475	0	0.15261	0.0822192	0.0954977	0.984373	0.0594597	0.22954	0.0898929	0.0862872	0.0470643	0.121867	0.126464	0.0904131	0	0.931192	0.0464028	0.189327	0.0889038	0.129235	0.467589	0.047632	0.115293	0.0745463	HSC_only
Gna12	0.1254	0.244793	0.0792429	0.15292	0.140108	0.16674	0.202421	0.124696	0.158026	0.175635	0.182241	0.264592	0.256899	0.272709	0.168833	0.953743	0.0958569	0.183139	0.172135	0.165378	0.159422	0.342792	0.12214	0.182297	0.193701	HSC_only
Gna15	0.156506	0.190852	0.0994871	0.130593	0.111935	0.18895	0.372797	0.134589	0.208199	0.154463	0.13094	0.101416	0.226241	0.133545	0.191026	0	0.266576	0.30262	0.218725	0.16649	0.115076	0.208001	0.100362	0.137031	0.121226	HSC_only
Gnai2	1.65348	1.9275	1.5058	1.65721	1.71268	1.65159	1.77531	1.49861	1.65287	1.67853	1.79971	1.76389	1.75442	1.71571	1.67909	0.953743	1.80756	1.71634	1.68884	1.69334	1.66212	1.79851	1.51433	1.69512	1.71441	HSC_only
Gnai3	0.518094	0.477558	0.701821	0.501022	0.5214	0.456785	0.569557	0.630385	0.447686	0.45181	0.775159	0.761326	0.643027	0.586924	0.47466	0	0.400296	0.493392	0.459876	0.445377	0.465143	1.04192	0.621581	0.535873	0.564021	HSC_only
Gnat2	0.0413068	0.0229365	0.0335076	0.033245	0.034123	0.0425518	0.0237432	0.114514	0.0532589	0.0498925	0	0.0289032	0.0306381	0.0309234	0.0431779	0	0.0102207	0.0528187	0.0546534	0.0437341	0.00819798	0.342792	0.0376149	0.0672407	0.0195365	HSC_only
Gnptab	0.12628	0.139128	0.0968913	0.113811	0.105553	0.117948	0.149945	0.162868	0.120886	0.102966	0.12307	0.0837794	0.074403	0.0748264	0.121591	0	0.0562058	0.139697	0.136262	0.108818	0.108315	0	0.0894731	0.129284	0.0857559	HSC_only
Golph3l	0.24093	0.265154	0.287749	0.231343	0.214909	0.197927	0.203384	0.0666981	0.184076	0.195898	0.154185	0.159195	0.167747	0.144545	0.213295	0.953743	0.324029	0.175296	0.213506	0.215583	0.231689	0	0.187978	0.231161	0.254522	HSC_only
Gosr1	0.0753015	0.0862045	0.0407954	0.0735608	0.069688	0.0860387	0.102588	0.0628132	0.0781642	0.07279	0.0880457	0.110841	0.149368	0.0957997	0.0769528	0	0.00868008	0.04501	0.0655743	0.0763213	0.101475	0	0.0953067	0.0799718	0.115345	HSC_only
Gpaa1	0.122574	0.374721	0.0949134	0.187749	0.153052	0.114523	0.369286	0.118206	0.200018	0.120494	0.129672	0.147344	0.168928	0.17131	0.121595	0	0.23044	0.105206	0.185503	0.122573	0.0725624	0	0.130675	0.138687	0.149637	HSC_only
Gpatch8	0.381117	0.381692	0.55851	0.379208	0.370138	0.415559	0.396395	0.403065	0.38953	0.403555	0.480216	0.509928	0.391476	0.6016	0.40423	0	0.365309	0.394535	0.390323	0.386367	0.558974	0.895465	0.383162	0.46313	0.34709	HSC_only
Gpbp1	0.586899	0.59898	0.609089	0.526039	0.527171	0.500967	0.521341	0.672442	0.46475	0.469354	0.547531	0.599602	0.714286	0.680942	0.516149	0.953743	0.532089	0.541781	0.513616	0.497555	0.592649	0.697248	0.737282	0.551518	0.601988	HSC_only
Gpbp1l1	0.224988	0.30151	0.292724	0.211897	0.235335	0.237754	0.284255	0.221963	0.242257	0.270112	0.332282	0.301898	0.332495	0.284838	0.281454	0	0.250813	0.282378	0.250378	0.263511	0.295857	0.550793	0.297552	0.345846	0.276615	HSC_only
Gpcpd1	0.129064	0.113397	0.169391	0.111779	0.121883	0.149332	0.190607	0.210137	0.139477	0.171788	0.237536	0.221941	0.218193	0.18127	0.167376	0	0.160433	0.200894	0.140971	0.170702	0.248428	0	0.180097	0.187373	0.212573	HSC_only
Gps1	0.479211	0.600556	0.533961	0.677184	0.441134	0.300732	0.555339	0.355742	0.439163	0.283618	0.230957	0.281954	0.490642	0.14748	0.299805	0	0.646537	0.388471	0.454771	0.279068	0.272671	0	0.245401	0.345568	0.247125	HSC_only
Gsk3a	0.256232	0.334111	0.156701	0.309435	0.263804	0.220025	0.389138	0.169529	0.260577	0.233509	0.35508	0.350804	0.305071	0.300067	0.262716	0	0.359299	0.209238	0.264881	0.247367	0.23782	1.01185	0.249736	0.286469	0.26271	HSC_only
Gstm1	0.827009	0.340153	0.564521	0.670026	0.943348	1.05283	0.585974	0.897758	0.832795	1.16055	1.05429	1.13381	0.847203	1.35098	1.07967	1.75548	0.3278	1.01049	0.805502	1.13119	1.01235	0.342792	0.862153	0.866166	1.20478	HSC_only
Gstm5	0.355251	0.290927	0.412357	0.439858	0.359584	0.381832	0.510368	0.279328	0.444468	0.399118	0.281616	0.354333	0.387552	0.289889	0.377748	0	0.496039	0.338583	0.454269	0.377514	0.38238	0.354456	0.321644	0.405519	0.32859	HSC_only
Gsto1	0.450053	0.387952	0.515917	0.581353	0.368461	0.434065	0.388539	0.318349	0.573773	0.372444	0.308686	0.366861	0.49019	0.375226	0.430738	0	0.332033	0.376918	0.594048	0.385835	0.405866	0.354456	0.400046	0.526048	0.371994	HSC_only
Gtf2h4	0.173272	0.215606	0.24256	0.181589	0.165864	0.163176	0.24064	0.178964	0.211645	0.160123	0.0908117	0.0936732	0.186873	0.068519	0.149692	0.953743	0.181264	0.17257	0.18035	0.171726	0.0652085	0.342792	0.147882	0.221043	0.14092	HSC_only
Gtpbp6	0.101542	0.154398	0.0862906	0.141484	0.109733	0.106777	0.12102	0.0721158	0.119204	0.12066	0.179982	0.183465	0.158743	0.0639165	0.123059	0.953743	0.164221	0.150074	0.132275	0.128802	0.13264	0	0.159852	0.137814	0.143715	HSC_only
Gtpbp8	0.113667	0.215634	0.187696	0.1461	0.139587	0.117736	0.143594	0.1222	0.122566	0.125655	0.113096	0.0952	0.0696801	0.182348	0.123811	0.953743	0.157688	0.16883	0.138027	0.134608	0.104796	0	0.132699	0.14378	0.167289	HSC_only
Guca1a	0.376702	0.303632	0.508875	0.446675	0.309575	0.276586	0.288709	0.286452	0.388205	0.286479	0.26332	0.285892	0.370622	0.268361	0.287063	0.953743	0.221566	0.469334	0.373864	0.283277	0.291662	0.559788	0.255982	0.313632	0.244299	HSC_only
Gucd1	0.0482913	0.0665949	0.0733257	0.0551384	0.0777607	0.054596	0.0583521	0.0173889	0.0718289	0.0562304	0.0603077	0.0628731	0.0874517	0.0532252	0.0489866	0	0.0912786	0.0281814	0.0639452	0.0627054	0.0336736	0.208001	0.0676308	0.0644169	0.0778463	HSC_only
Guk1	0.454741	0.421655	0.323089	0.569016	0.37585	0.376416	0.392708	0.402064	0.482739	0.35373	0.385553	0.508595	0.530361	0.444759	0.374981	1.43289	0.426759	0.359334	0.507602	0.363761	0.233771	0	0.281833	0.437902	0.305342	HSC_only
H2-Ab1	0.290886	0.268668	0.60315	0.325694	0.256571	0.294791	0.280245	0.535627	0.338074	0.261841	0.241429	0.322802	0.34238	0.225486	0.292564	0	0.27459	0.698174	0.379136	0.303652	0.253525	0.342792	0.259094	0.247175	0.20959	HSC_only
H2-D1	2.56731	2.54095	2.85578	2.50786	2.6667	2.70901	2.51029	2.96077	2.59546	2.76912	2.80429	2.80376	2.6359	2.97046	2.72117	2.83051	2.60728	2.94902	2.63465	2.77914	2.59263	2.83494	2.88001	2.59868	2.7345	HSC_only
H2-DMb1	0.20207	0.35565	0.226768	0.22796	0.219678	0.305609	0.242444	0.44712	0.331773	0.312872	0.33827	0.342557	0.361445	0.40029	0.320042	0	0.239775	0.388471	0.336713	0.320018	0.328452	0.354456	0.256894	0.284644	0.24374	HSC_only
H2-Ke6	0.323883	0.268353	0.535223	0.443907	0.338029	0.355228	0.394027	0.381072	0.44364	0.342471	0.34145	0.350778	0.362758	0.487228	0.353261	0	0.337276	0.309421	0.448535	0.3587	0.374373	0.467589	0.301495	0.409173	0.395696	HSC_only
H2afv	0.911241	2.11628	0.714411	0.851461	0.887513	0.973148	2.10706	0.913482	1.00932	1.00423	1.02026	0.896695	0.937618	0.790252	1.04139	1.43289	2.10217	0.923936	1.00245	1.04683	0.937809	1.78207	0.777511	0.911549	0.920941	HSC_only
Hacd1	0.187552	0.255037	0.121841	0.295498	0.161687	0.147763	0.240519	0.173131	0.230123	0.138763	0.0854049	0.152276	0.138912	0.0304251	0.127505	0	0.171398	0.106619	0.228241	0.129192	0.149901	0.697248	0.127475	0.228585	0.121559	HSC_only
Hacd2	0.16416	0.24651	0.334103	0.150966	0.133211	0.147719	0.288811	0.113231	0.156073	0.153372	0.142924	0.101543	0.11571	0.0665176	0.159397	0	0.306734	0.187967	0.166604	0.14843	0.17255	0	0.177345	0.140516	0.126782	HSC_only
Hagh	0.121584	0.238782	0.0683745	0.154277	0.145799	0.15934	0.174353	0.105428	0.166529	0.136737	0.131532	0.106328	0.096357	0.213384	0.155223	0	0.182823	0.0876564	0.152996	0.148999	0.174058	0	0.129017	0.163868	0.139647	HSC_only
Hat1	0.320944	0.789737	0.562043	0.432497	0.289423	0.271024	0.957444	0.447687	0.405559	0.25393	0.314462	0.399272	0.439856	0.422815	0.265172	0	0.765237	0.399721	0.392322	0.259895	0.365515	0.559788	0.376604	0.361138	0.247525	HSC_only
Haus1	0.103689	0.32219	0.0810733	0.121684	0.0881034	0.113362	0.360637	0.185511	0.17261	0.111286	0.116295	0.0912224	0.136719	0.161326	0.114559	0	0.332663	0.131542	0.137427	0.111009	0.162325	0.354456	0.0905655	0.161908	0.0915902	HSC_only
Haus4	0.172414	0.619989	0.217053	0.171585	0.190744	0.237314	0.820058	0.212327	0.287626	0.233211	0.183228	0.17336	0.260906	0.303721	0.2275	0.953743	0.799355	0.224199	0.275524	0.242833	0.265218	0.544258	0.183925	0.314225	0.26508	HSC_only
Haus5	0.0517782	0.240626	0	0.0611628	0.042068	0.0431823	0.235661	0.0222988	0.0898097	0.049533	0.0640954	0.0486074	0.0824234	0	0.047546	0	0.291437	0.0265232	0.069095	0.0607651	0.0213921	0.559788	0.0433308	0.0783384	0.0387557	HSC_only
Haus6	0.0496177	0.20352	0.0311127	0.0615798	0.0429328	0.0430269	0.136964	0.138324	0.0620939	0.0468546	0.0228408	0.0273596	0.0798512	0	0.0492267	0	0.112026	0.0473931	0.0607953	0.0419301	0.0370301	0	0.0427413	0.0681982	0.0600112	HSC_only
Haus7	0.118685	0.313568	0.234883	0.157975	0.111733	0.0982843	0.277994	0.0619955	0.154746	0.0979452	0.0862869	0.0797011	0.0796473	0.10082	0.110345	0	0.375141	0.0933716	0.137546	0.101375	0.0697984	0.550793	0.0978516	0.12817	0.0835739	HSC_only
Hbp1	0.295227	0.184397	0.0933853	0.20444	0.315427	0.324143	0.209738	0.299731	0.234443	0.354572	0.379887	0.344774	0.275472	0.434517	0.345216	0	0.230459	0.142204	0.259765	0.32786	0.36957	0.550793	0.134137	0.309805	0.334995	HSC_only
Hcls1	0.568784	0.459703	0.493885	0.561298	0.541586	0.579585	0.561941	0.384206	0.589568	0.537475	0.620802	0.657644	0.721106	0.740445	0.550334	0	0.60927	0.548421	0.593622	0.524468	0.573522	0.752259	0.609421	0.62873	0.587626	HSC_only
Hdac1	0.4827	0.695239	0.555745	0.54923	0.532353	0.468006	0.781443	0.535945	0.560814	0.511254	0.49554	0.516186	0.616158	0.336713	0.518662	0	0.844919	0.598166	0.575075	0.511645	0.471384	1.01185	0.61465	0.589463	0.489343	HSC_only
Hdac3	0.281645	0.432835	0.232581	0.336228	0.25328	0.264375	0.445155	0.169677	0.344899	0.262465	0.231988	0.307378	0.323523	0.369499	0.256227	0	0.42752	0.246694	0.348276	0.252723	0.238344	0.354456	0.276835	0.346431	0.287082	HSC_only
Hdac7	0.160166	0.137536	0.127558	0.128527	0.155319	0.20406	0.249805	0.138045	0.188041	0.184015	0.178179	0.144753	0.202664	0.106251	0.208925	0.953743	0.182596	0.0896819	0.201873	0.204966	0.21702	0.208001	0.0858327	0.194289	0.206176	HSC_only
Hdgf	1.09565	1.56525	1.00109	1.3111	1.01669	0.865621	1.51626	1.04608	1.14584	0.847531	0.894572	0.999777	1.22783	0.906364	0.855198	0.953743	1.55332	0.718877	1.11441	0.812643	0.983694	1.44935	0.759285	1.11592	0.874496	HSC_only
Hectd1	0.786496	0.664079	0.852068	0.682693	0.670762	0.727773	0.566314	0.587061	0.633281	0.58362	0.822726	0.770416	0.690321	0.846432	0.740022	0	0.667758	0.587979	0.626249	0.62317	0.785207	1.01185	1.09324	0.770287	0.677563	HSC_only
Helb	0.0974531	0.21043	0.165408	0.100366	0.0838292	0.0902519	0.192746	0.0458861	0.103831	0.0874698	0.0953269	0.0577509	0.135687	0.107214	0.0936518	0	0.190857	0.100208	0.0990831	0.0927949	0.114304	0	0.0819758	0.0745087	0.081106	HSC_only
Herc1	0.37277	0.468748	0.390043	0.33075	0.350427	0.365792	0.394433	0.368379	0.331972	0.314936	0.46887	0.45125	0.419137	0.556454	0.374118	0.953743	0.294848	0.286889	0.324437	0.326981	0.440138	0	0.381978	0.424226	0.426845	HSC_only
Herpud2	0.214606	0.267195	0.259658	0.18117	0.185618	0.239932	0.233374	0.305951	0.206671	0.210623	0.284258	0.280569	0.181784	0.392777	0.234989	0.953743	0.269948	0.260561	0.2037	0.216234	0.221151	0.208001	0.295042	0.230566	0.344767	HSC_only
Hint1	1.54223	2.1771	1.27262	1.7177	1.50569	1.45063	2.13325	1.48699	1.72817	1.44534	1.38192	1.50826	1.6313	1.54956	1.44877	1.43289	2.04317	1.43627	1.68487	1.4778	1.34474	1.55267	1.26805	1.51215	1.39165	HSC_only
Hipk2	0.265475	0.392071	0.261611	0.241543	0.210892	0.183197	0.325282	0.189041	0.187671	0.180334	0.280561	0.25441	0.258497	0.32335	0.216915	0	0.228475	0.2913	0.199515	0.196479	0.195956	0.208001	0.25848	0.24931	0.224905	HSC_only
Hist1h1c	0.741381	0.341041	0.528411	0.390652	0.674521	0.808338	0.484456	0.615997	0.435489	0.727905	0.608687	0.747947	0.448129	0.90516	0.627343	0	0.603296	0.424583	0.330742	0.598279	0.800308	0.544258	0.361101	0.575045	0.864566	HSC_only
Hist1h1d	0.0375788	0.211286	0.0879438	0.0459968	0.0731171	0.046186	0.196181	0.0178163	0.0516228	0.0937474	0.0247318	0.0320441	0.0178044	0.0506798	0.0361476	0	0.22871	0.0382092	0.0506587	0.084163	0.0644632	0	0.0549827	0.0818301	0.0472839	HSC_only
Hist1h1e	0.201455	0.446277	0.0810733	0.158859	0.1741	0.197806	0.411065	0.129847	0.157105	0.214876	0.214425	0.228885	0.232465	0.0783511	0.187487	0	0.399694	0.162407	0.165769	0.182908	0.297789	0	0.162704	0.22019	0.222017	HSC_only
Hist1h2bc	0.391492	0.330041	0.30074	0.135781	0.209024	0.455024	0.324596	0.380117	0.157706	0.323817	0.186436	0.288052	0.151289	0.183621	0.385623	0.953743	0.486164	0.222974	0.160485	0.319612	0.51722	0.687464	0.171063	0.168021	0.344724	HSC_only
Hist3h2ba	0.0770636	0.201944	0	0.0485069	0.099299	0.139157	0.169228	0.0720033	0.0525675	0.141733	0.214109	0.153435	0.0770191	0.138193	0.128635	0	0.385047	0.0343653	0.0637309	0.116285	0.0685423	0	0.0908319	0.0874088	0.0938692	HSC_only
Hivep3	0.214712	0.11779	0	0.173245	0.200387	0.188247	0.0849244	0.223544	0.186804	0.2127	0.382786	0.452609	0.317153	0.327816	0.214708	0	0.0951379	0.287212	0.155997	0.201296	0.222556	0	0.166264	0.218563	0.254763	HSC_only
Hmg20b	0.422267	0.429075	0.578532	0.47283	0.442669	0.413448	0.506772	0.317426	0.469132	0.441202	0.348808	0.414835	0.401182	0.364806	0.435188	0	0.63884	0.400675	0.474271	0.42687	0.489872	0.550793	0.37557	0.52193	0.424773	HSC_only
Hmgb1	1.84894	2.82203	1.65224	1.90057	1.85191	1.88116	2.70229	1.79049	1.97436	1.86199	2.12016	2.18804	2.13159	2.04908	1.91193	1.43289	2.73948	1.82567	1.99678	1.89103	2.16285	2.65489	1.79927	2.16506	2.10286	HSC_only
Hmgb3	0.499446	1.22045	0.650773	0.579961	0.459789	0.532534	1.10955	0.447905	0.685173	0.496489	0.507893	0.548725	0.7149	0.559668	0.53001	0	1.19179	0.480522	0.674926	0.497999	0.582032	1.39239	0.41808	0.638461	0.496471	HSC_only
Hmgn5	0.242009	0.787761	0.22481	0.245253	0.191085	0.26072	0.715479	0.233784	0.310251	0.242803	0.274146	0.260276	0.370553	0.281893	0.269932	0	0.708371	0.236191	0.314892	0.241623	0.309483	1.15505	0.230543	0.367918	0.260459	HSC_only
Hnmt	0.105511	0.0647263	0	0.0819378	0.0906303	0.152854	0.142131	0.146184	0.134677	0.146084	0.114783	0.0899263	0.0984266	0.111539	0.145373	0	0.169992	0.171514	0.127406	0.138365	0.15626	0	0.0999158	0.193761	0.189138	HSC_only
Hnrnpa0	1.45819	1.59326	1.43268	1.48481	1.29892	1.28825	1.5233	1.14801	1.32163	1.15785	1.38988	1.44336	1.41554	1.29493	1.36188	1.75548	1.62557	1.12676	1.38633	1.2228	1.35599	1.67069	1.19358	1.36004	1.28872	HSC_only
Hnrnpa1	1.90789	2.27417	1.75783	2.02583	1.79331	1.84666	2.24451	1.83299	2.00932	1.77393	1.8088	1.89312	2.0872	1.83746	1.87735	0.953743	2.20481	1.71838	2.01007	1.77418	1.93499	2.44086	1.71769	1.99845	1.75608	HSC_only
Hnrnpc	0.932784	1.12862	1.04862	1.02372	0.858454	0.883187	1.16826	0.90868	0.993118	0.901502	0.968883	0.924277	1.06317	0.738161	0.969479	1.43289	1.13983	0.991153	1.03063	0.913534	0.959086	0.898713	0.894884	0.942292	0.805315	HSC_only
Hnrnph3	0.545568	0.455096	0.529193	0.528824	0.565486	0.572959	0.580328	0.382246	0.525307	0.570193	0.780025	0.652946	0.661351	0.481264	0.593454	0	0.648216	0.593064	0.545647	0.607026	0.664773	0	0.465589	0.592959	0.643302	HSC_only
Hnrnpll	0.153542	0.276411	0.17037	0.168953	0.116691	0.138342	0.240887	0.0863562	0.14917	0.119573	0.242942	0.212808	0.223297	0.256164	0.133034	0	0.260388	0.111896	0.157603	0.135862	0.136555	0.208001	0.136671	0.204047	0.133139	HSC_only
Hnrnpu	1.52353	1.89221	1.4778	1.73043	1.35747	1.28021	1.73293	1.29751	1.47333	1.12036	1.30639	1.364	1.5148	0.99987	1.28223	2.19467	1.72282	1.11376	1.45555	1.11052	1.35331	1.59641	1.18535	1.49961	1.21546	HSC_only
Homer1	0.0700412	0.134889	0	0.0496812	0.0477145	0.0463557	0.0310949	0.100578	0.0416859	0.0549593	0.148204	0.0991027	0.102073	0.0707901	0.0569525	0	0.0697593	0.0581823	0.0464412	0.0525009	0.0361605	0	0.203509	0.0624902	0.0739212	HSC_only
Hook1	0.17846	0.164817	0.115844	0.194998	0.171112	0.133353	0.176965	0.216905	0.135494	0.117051	0.211536	0.184697	0.210192	0.107444	0.143616	0	0.222559	0.110568	0.131912	0.124989	0.126292	0.550793	0.156799	0.154885	0.198095	HSC_only
Hoxa7	0.338426	0.272826	0.191414	0.295754	0.33334	0.337728	0.282886	0.201765	0.328276	0.367493	0.40389	0.477122	0.361716	0.328859	0.349686	0	0.310543	0.356993	0.329954	0.362399	0.313225	0.697248	0.186575	0.326557	0.361104	HSC_only
Hoxb2	0.148612	0.257347	0.200861	0.172922	0.199509	0.18423	0.285838	0.280615	0.180821	0.210812	0.175724	0.143615	0.139018	0.103374	0.181668	0	0.202299	0.284336	0.196707	0.238721	0.227826	0.467589	0.529538	0.233052	0.249825	HSC_only
Hpf1	0.347996	0.89947	0.319382	0.460789	0.352244	0.300747	0.941626	0.389514	0.459262	0.330596	0.329564	0.28523	0.43833	0.163586	0.317533	0	0.947155	0.295963	0.421974	0.331739	0.371553	1.01185	0.348172	0.440628	0.349074	HSC_only
Hsd17b11	0.162672	0.142006	0.0376498	0.129217	0.215407	0.211559	0.126275	0.243634	0.176195	0.280317	0.389828	0.229912	0.196529	0.460088	0.241686	0	0.218369	0.248309	0.207404	0.28351	0.397233	0.544258	0.253993	0.247288	0.316768	HSC_only
Hsh2d	0.0600794	0.0493875	0.199387	0.0750747	0.0625237	0.0848636	0.0767289	0.21876	0.0868043	0.0852449	0.122002	0.0877953	0.170653	0.15315	0.0646353	0	0.108721	0.234106	0.0945585	0.0833159	0.228388	0	0.421284	0.19064	0.218013	HSC_only
Hsp90aa1	2.13753	2.55972	2.27851	2.42924	1.89998	1.86798	2.53734	2.03736	2.19448	1.66353	1.73635	1.76799	2.08766	1.6848	1.91676	2.4988	2.62845	1.7979	2.23378	1.72761	1.76729	2.16683	1.81339	1.96126	1.54515	HSC_only
Hsp90ab1	3.20967	3.25102	3.17863	3.35756	3.11432	3.14798	3.36068	3.19529	3.3434	3.08019	2.99097	3.15926	3.26818	3.10193	3.16919	2.83051	3.43542	3.14743	3.35746	3.08986	3.01176	3.14941	2.94156	3.23705	2.98438	HSC_only
Hspa12b	0.040915	0.0398197	0.0787426	0.056221	0.0685778	0.0804482	0.0651723	0.0469972	0.0798279	0.085703	0.0978018	0.0260695	0.0628693	0.0424506	0.0840762	0	0.0976273	0.0608198	0.0868703	0.092706	0.10564	0	0.0376813	0.0786813	0.117475	HSC_only
Hspa5	1.77815	1.4534	1.93235	1.88248	1.35136	1.34025	1.29541	1.47762	1.32874	0.996765	1.22622	1.14923	1.32681	1.0031	1.51349	1.99899	1.57102	1.52929	1.42525	1.03019	1.31345	1.44935	1.73372	1.25087	1.05464	HSC_only
Hspbp1	0.342208	0.271921	0.317222	0.427417	0.290549	0.314693	0.367264	0.269042	0.452422	0.302395	0.262919	0.264036	0.390254	0.312663	0.328044	0	0.392329	0.31595	0.472658	0.294871	0.269575	0.354456	0.239545	0.399779	0.259713	HSC_only
Hspd1	1.15248	1.41129	1.05908	1.56425	1.05703	0.947712	1.37291	1.05846	1.34138	0.856258	0.822731	0.998566	1.42519	0.544781	0.906709	0	1.35671	0.963249	1.31214	0.832824	0.828026	1.10405	0.888758	1.21197	0.889172	HSC_only
Hsph1	0.185312	0.351412	0.253064	0.322781	0.143405	0.11917	0.232239	0.140298	0.203552	0.101341	0.0802564	0.112303	0.248987	0.0329244	0.135311	0	0.182094	0.112519	0.223776	0.109787	0.121466	0.550793	0.10805	0.181894	0.107011	HSC_only
Htr2a	0.0472984	0.0168068	0.039818	0.0434689	0.0487695	0.0548234	0.0593445	0.116439	0.0567296	0.0560036	0.220414	0.16574	0.237177	0.0824948	0.0534261	0	0.0759497	0.0521737	0.05901	0.0599218	0.116711	0	0.0208987	0.0699612	0.044174	HSC_only
Id2	0.107847	0.165983	0.171278	0.0706202	0.0786373	0.103266	0.152124	0.126118	0.0788068	0.0870033	0.182498	0.147736	0.126111	0.111929	0.115017	0	0.143102	0.177487	0.0650572	0.0753435	0.181124	0.342792	0.397411	0.154938	0.106741	HSC_only
Idh2	0.518563	0.675056	0.573602	0.670815	0.488071	0.604068	0.950426	0.471992	0.782423	0.574304	0.539471	0.488643	0.781278	0.692691	0.624344	0.953743	0.95891	0.683882	0.810571	0.575415	0.537431	0.90258	0.539215	0.622428	0.536526	HSC_only
Idh3g	0.576902	0.85654	0.600498	0.659569	0.534571	0.641823	0.870742	0.634633	0.690415	0.596209	0.517638	0.558334	0.669437	0.571215	0.625112	0.953743	0.918615	0.73027	0.668685	0.585256	0.536137	0.90258	0.503342	0.648879	0.584055	HSC_only
Ier3ip1	0.393937	0.462059	0.587482	0.404112	0.349379	0.375927	0.500792	0.368229	0.403404	0.352144	0.47137	0.473335	0.530639	0.435142	0.341009	0.953743	0.401049	0.330395	0.376367	0.343757	0.572552	0.342792	0.383721	0.514091	0.455638	HSC_only
Ier5	0.430717	0.43267	0.479741	0.300585	0.287471	0.523997	0.324958	0.356753	0.352009	0.329224	0.392451	0.244677	0.298489	0.235229	0.633285	0.953743	0.41175	0.407607	0.392986	0.345254	0.592856	0.752259	1.06173	0.340862	0.337079	HSC_only
Ifi35	0.342431	0.361491	0.810253	0.426934	0.324017	0.277472	0.300263	0.867116	0.340878	0.243495	0.216198	0.232394	0.264419	0.151017	0.273699	0	0.289083	0.81664	0.34813	0.277146	0.422052	0	1.08186	0.441742	0.434935	HSC_only
Ifit2	0.0522742	0.109986	0.923919	0.0513841	0.0480733	0.065781	0.127485	0.942349	0.094777	0.082274	0.0826408	0.0337941	0.0557845	0.0345896	0.0781184	0	0.159872	0.971482	0.0767546	0.0740622	0.775141	0.550793	2.24578	0.460697	0.506949	HSC_only
Ift20	0.712334	0.665191	0.590552	0.798055	0.661656	0.669265	0.719308	0.556036	0.726932	0.677017	0.634522	0.595238	0.691911	0.539229	0.68593	0.953743	0.695061	0.669173	0.740445	0.697491	0.712234	0.697248	0.437061	0.713285	0.662955	HSC_only
Ift22	0.105955	0.125724	0.0751947	0.11499	0.113145	0.118386	0.161181	0.105581	0.144247	0.116008	0.0862928	0.102035	0.123855	0.0911934	0.102875	0	0.153513	0.128198	0.107261	0.117117	0.11609	0	0.0724368	0.182509	0.140872	HSC_only
Ift27	0.176656	0.299662	0.214276	0.202374	0.172754	0.205159	0.392028	0.320091	0.255866	0.188751	0.161506	0.160281	0.16152	0.174123	0.195471	0	0.3587	0.232819	0.232647	0.191348	0.157527	0.208001	0.117592	0.22078	0.156553	HSC_only
Ift46	0.0856519	0.110254	0.080765	0.0658507	0.0790564	0.111548	0.169935	0.0524554	0.0864087	0.111975	0.0722439	0.0593914	0.05429	0.0307681	0.10314	0	0.159892	0.0916708	0.080083	0.120597	0.099426	0	0.0674699	0.0907334	0.0961555	HSC_only
Ift74	0.136178	0.287935	0.109448	0.128358	0.140086	0.143441	0.215718	0.0920262	0.15689	0.137158	0.159527	0.115826	0.0930854	0.0335932	0.153951	0.953743	0.173412	0.122957	0.12639	0.120784	0.155173	0	0.127567	0.149788	0.231489	HSC_only
Igf2bp2	0.175483	0.111981	0.270702	0.131675	0.199999	0.15895	0.115925	0.193263	0.138991	0.173148	0.219171	0.232119	0.187072	0.244422	0.165807	0	0.113548	0.200899	0.125107	0.183524	0.130846	0	0.190888	0.171089	0.215612	HSC_only
Igf2bp3	0.083382	0.112017	0.16257	0.0850798	0.106982	0.0959233	0.0403824	0.132275	0.0812881	0.106722	0.153232	0.173762	0.122928	0.177179	0.106256	0	0.0655923	0.129919	0.0808573	0.0992861	0.189823	0	0.08647	0.115016	0.152513	HSC_only
Igfbp4	0.376824	0.478395	0.386897	0.530435	0.403469	0.505062	0.53346	0.365337	0.64607	0.466672	0.427857	0.444435	0.535419	0.42197	0.452655	1.43289	0.533921	0.336952	0.605391	0.435461	0.50566	0	0.354088	0.534146	0.473716	HSC_only
Ikzf1	0.407128	0.449859	0.378431	0.39799	0.361111	0.384278	0.423493	0.250827	0.365934	0.338766	0.55862	0.488085	0.508288	0.548334	0.385527	0.953743	0.396713	0.431098	0.352362	0.349651	0.555392	0.697248	0.39799	0.448507	0.463571	HSC_only
Il4	0.0545639	0.0196138	0	0.0341472	0.0733899	0.147037	0.0408819	0.106809	0.129044	0.149299	0.0827771	0.075616	0.0694415	0.163914	0.154879	0	0.0415407	0.197216	0.111313	0.153239	0.140843	0	0.0923619	0.111563	0.120166	HSC_only
Immp1l	0.410416	0.515019	0.362876	0.432245	0.385496	0.366449	0.5558	0.459059	0.411189	0.367081	0.424197	0.354168	0.441148	0.370134	0.390464	0.953743	0.477573	0.466622	0.418478	0.388678	0.420892	0.354456	0.337854	0.425719	0.360883	HSC_only
Impa1	0.290707	0.474857	0.166996	0.342711	0.312185	0.319833	0.414452	0.419398	0.363958	0.308065	0.305382	0.288285	0.33511	0.159952	0.309788	0	0.339733	0.328246	0.336831	0.30583	0.363499	0.697248	0.325274	0.363524	0.321101	HSC_only
Impa2	0.200764	0.465948	0.195739	0.244658	0.223575	0.28764	0.591463	0.276676	0.385366	0.279631	0.278658	0.261256	0.309154	0.275856	0.300822	0	0.602336	0.342116	0.36693	0.294211	0.356174	0.208001	0.243783	0.270088	0.335422	HSC_only
Impdh2	1.23019	1.63377	1.05897	1.40478	1.16233	1.17221	1.73948	1.1499	1.42367	1.1621	1.10503	1.17282	1.30215	1.05657	1.136	1.43289	1.66001	1.16655	1.38538	1.15208	1.15484	1.78505	1.17597	1.38906	1.03752	HSC_only
Inafm2	0.0757393	0.036821	0.0759668	0.0832305	0.0629938	0.0750978	0.0610381	0.07974	0.0826232	0.0541769	0.111728	0.116029	0.176893	0.0620629	0.0816481	0	0.0736361	0.0578499	0.0753594	0.0608745	0.076101	0	0.0505149	0.100436	0.0400579	HSC_only
Ing1	0.364102	0.591211	0.261328	0.330769	0.356501	0.402263	0.533884	0.238965	0.37956	0.403001	0.277175	0.37854	0.42879	0.288429	0.393003	1.43289	0.522395	0.346655	0.378878	0.410094	0.323302	0.550793	0.2318	0.365549	0.403717	HSC_only
Inhba	0.0947568	0.0200154	0.0689485	0.0472148	0.167434	0.0877843	0	0.0825104	0.0395958	0.133484	0.128972	0.163988	0.0500275	0.169071	0.0900045	0	0	0.136412	0.0470864	0.136436	0.15102	0	0.0269221	0.0518898	0.138068	HSC_only
Ino80e	0.315751	0.370089	0.318425	0.360986	0.305373	0.270771	0.375123	0.230093	0.317845	0.257943	0.189076	0.258905	0.242414	0.203095	0.263216	0	0.397472	0.234302	0.323539	0.282677	0.305796	0	0.155935	0.335428	0.251031	HSC_only
Inpp4a	0.0523486	0.113539	0.0801682	0.0657722	0.0875792	0.0794451	0.0342715	0.0904605	0.0650981	0.0874479	0.164354	0.121894	0.108873	0.123004	0.0982063	0	0.0843382	0.0761895	0.0714639	0.106123	0.0800282	0.342792	0.124651	0.104842	0.167033	HSC_only
Inpp5a	0.0639911	0.0786899	0	0.0496357	0.0593773	0.04745	0.0228965	0.0785177	0.0452143	0.0366562	0.0962277	0.0896028	0.102429	0.0298939	0.0496974	0.953743	0.0357333	0.0737042	0.056278	0.0364247	0.0589976	0	0.0557344	0.0571301	0.0692349	HSC_only
Insig1	0.297034	0.111706	0.308719	0.306586	0.224162	0.263516	0.206006	0.3058	0.244856	0.232592	0.324852	0.363782	0.333155	0.411846	0.269847	1.43289	0.196895	0.131671	0.221523	0.223035	0.340496	0	0.135915	0.268337	0.194596	HSC_only
Ints10	0.145585	0.201505	0.190081	0.162335	0.15085	0.160051	0.314023	0.0934672	0.197761	0.153877	0.126403	0.113318	0.13149	0	0.151594	0	0.216471	0.109017	0.170562	0.134327	0.15363	0.342792	0.100139	0.183665	0.172164	HSC_only
Ints11	0.138226	0.323357	0.12351	0.145784	0.145757	0.131527	0.290067	0.182426	0.17629	0.121222	0.117796	0.102744	0.198301	0.0347822	0.115759	0.953743	0.314999	0.108704	0.173003	0.123001	0.185754	0	0.0969635	0.152306	0.144039	HSC_only
Ippk	0.0839392	0.066156	0.0351608	0.0792601	0.054207	0.0555094	0.0665014	0.0461736	0.0568156	0.0558955	0.0137578	0.0436007	0.0367111	0	0.045756	0	0.0665632	0.0714939	0.0557316	0.0536178	0.0961337	0	0.0305411	0.0717741	0.0651172	HSC_only
Iqgap1	0.618479	0.790331	0.584732	0.533301	0.589778	0.659672	0.659706	0.623904	0.561536	0.602179	0.825713	0.687694	0.597988	0.684129	0.642266	0	0.681495	0.656778	0.558112	0.622419	0.727429	1.15311	0.634902	0.681717	0.764828	HSC_only
Irf2bp2	0.375592	0.409142	0.378064	0.381364	0.333764	0.404484	0.265643	0.473187	0.39944	0.34947	0.804142	0.632758	0.775953	0.517595	0.423148	0.953743	0.32493	0.286193	0.414099	0.381303	0.524517	0.354456	0.73964	0.439866	0.334629	HSC_only
Irf8	0.0332484	0.0772308	0.102555	0.027516	0.0274108	0.0359175	0.0610109	0.0952248	0.0417351	0.0453198	0.139567	0.18331	0.120835	0.14556	0.038373	0	0.0119323	0.216931	0.0430471	0.0335011	0.125596	0	0.570058	0.0599923	0.0498889	HSC_only
Isoc2b	0.0855676	0.104146	0.0391254	0.0701065	0.0979984	0.121072	0.129894	0.162999	0.109012	0.129301	0.0928387	0.0676902	0.0676586	0.0335932	0.106947	0	0.134435	0.102723	0.124751	0.137726	0.182406	0.342792	0.0964164	0.121789	0.153654	HSC_only
Ist1	0.255134	0.244168	0.269726	0.222104	0.233243	0.209513	0.293234	0.0996007	0.207094	0.209235	0.345852	0.231335	0.332258	0.207635	0.230882	0	0.344461	0.0939124	0.223918	0.230215	0.250117	0.354456	0.261014	0.220489	0.26997	HSC_only
Isyna1	0.157526	0.199863	0.0900755	0.245959	0.139218	0.170052	0.297112	0.102593	0.281951	0.151309	0.146736	0.130144	0.180336	0.108245	0.193627	1.75548	0.343158	0.100386	0.290677	0.178626	0.19262	0	0.134151	0.181946	0.0856647	HSC_only
Itga5	0.0950457	0.0878965	0.039818	0.100635	0.094365	0.0796608	0.0848365	0.123309	0.0794673	0.0761588	0.0690664	0.0672159	0.0690522	0.0701167	0.0702474	0	0.0722534	0.0767449	0.0780626	0.0794021	0.123704	0	0.0349811	0.0896267	0.0958856	HSC_only
Itgb1	0.529422	0.670873	0.642	0.540217	0.509227	0.481614	0.607912	0.411762	0.518794	0.43495	0.61681	0.635989	0.721921	0.74152	0.480444	1.43289	0.572916	0.527778	0.536233	0.440586	0.43072	0.704924	0.496318	0.618688	0.561322	HSC_only
Itgb3	0.080249	0.123311	0.0920596	0.0911458	0.0723073	0.0560421	0.0528538	0.035218	0.0507776	0.0471599	0.111156	0.154808	0.185871	0.0400442	0.055046	0	0.0356384	0.0284056	0.068026	0.0434683	0.154515	0	0.0517374	0.0732205	0.0711104	HSC_only
Itm2a	0.167315	0.234949	0.166405	0.161031	0.179029	0.233245	0.225894	0.264857	0.207094	0.214389	0.305381	0.280215	0.284241	0.212511	0.244384	0	0.318467	0.234052	0.20252	0.235112	0.227885	0	0.183684	0.234824	0.272661	HSC_only
Itpa	0.161758	0.405914	0.237819	0.234806	0.160454	0.179418	0.41803	0.266558	0.247013	0.173901	0.109646	0.137811	0.19488	0.144025	0.160132	0	0.406149	0.14499	0.222449	0.180506	0.235804	0	0.124896	0.203694	0.178014	HSC_only
Itsn1	0.450505	0.266983	0.348937	0.310777	0.458849	0.532307	0.36786	0.346417	0.392407	0.526441	0.776453	0.54267	0.525478	0.327175	0.543707	0	0.300525	0.412972	0.38048	0.535771	0.638864	0.342792	0.424967	0.486151	0.659198	HSC_only
Jade1	0.316172	0.302106	0.323662	0.290244	0.325945	0.28855	0.278483	0.221437	0.268302	0.270634	0.42015	0.470199	0.453174	0.669522	0.285294	0	0.241683	0.295504	0.253143	0.280392	0.352209	0.354456	0.166333	0.331234	0.340918	HSC_only
Jade2	0.1203	0.0974314	0.252113	0.107015	0.102998	0.138962	0.0857465	0.234145	0.126395	0.139198	0.251043	0.212827	0.196058	0.262776	0.127682	0	0.0502965	0.098336	0.120302	0.118213	0.137842	0	0.113196	0.151588	0.158629	HSC_only
Jam2	0.191373	0.220394	0.258521	0.153723	0.183776	0.0684815	0.0582755	0.0793809	0.0505442	0.0892778	0.121259	0.146125	0.071903	0.032993	0.0909932	0	0.0555378	0.0743165	0.0740884	0.104191	0.0675564	0	0.247932	0.0880744	0.113196	HSC_only
Jpt2	0.167999	0.389658	0.204396	0.249901	0.148633	0.10655	0.407013	0.10473	0.231964	0.102968	0.0997008	0.147908	0.21737	0.160632	0.120363	0	0.399255	0.151675	0.197385	0.0992506	0.108725	0.467589	0.121936	0.162566	0.0951627	HSC_only
Jtb	0.499696	0.446864	0.333129	0.615001	0.475917	0.407308	0.5117	0.324619	0.513408	0.426826	0.380335	0.428577	0.411462	0.402383	0.438132	1.43289	0.42952	0.41127	0.505074	0.414253	0.338634	0.467589	0.398966	0.485113	0.455296	HSC_only
Kansl1	0.32096	0.268222	0.216622	0.280665	0.305566	0.363101	0.29071	0.317801	0.272271	0.277413	0.313964	0.397364	0.380753	0.207338	0.362777	0	0.342768	0.301425	0.28594	0.278093	0.322684	0.208001	0.274579	0.311384	0.342698	HSC_only
Kansl3	0.246872	0.235776	0.341338	0.257798	0.215724	0.220453	0.305177	0.260099	0.237071	0.185882	0.265389	0.337644	0.234819	0.46274	0.227737	0	0.363856	0.317512	0.238286	0.204317	0.226634	0.208001	0.181551	0.269008	0.262349	HSC_only
Kat2a	0.185448	0.18099	0.242505	0.267891	0.144047	0.13425	0.260814	0.110821	0.242724	0.156534	0.109155	0.1468	0.231838	0.138265	0.143933	0.953743	0.146047	0.105319	0.220095	0.139049	0.136765	0.342792	0.169612	0.266074	0.127836	HSC_only
Katnb1	0.0670314	0.149303	0.045235	0.0651599	0.0486285	0.0619253	0.083288	0.0403765	0.0611009	0.0505338	0.0363949	0.0351269	0.0252974	0.0307681	0.0579636	0	0.111364	0.0633231	0.0654179	0.062293	0.0377566	0	0.0545591	0.0687218	0.0882209	HSC_only
Kbtbd4	0.0727614	0.123513	0.12201	0.088068	0.0952471	0.0801646	0.0738133	0.167793	0.093236	0.0907125	0.0706853	0.0688924	0.058646	0.0704286	0.0688234	0	0.13451	0.129253	0.0813661	0.0885209	0.0588997	0	0.0616372	0.0895775	0.0567635	HSC_only
Kcnn4	0.523357	0.643918	0.550008	0.564072	0.543298	0.49781	0.553403	0.474778	0.563262	0.53239	0.44577	0.43778	0.416224	0.679126	0.451277	1.43289	0.529964	0.432229	0.549384	0.519797	0.396466	0.810381	0.094087	0.415368	0.454452	HSC_only
Kctd10	0.163833	0.128444	0.12505	0.11725	0.200441	0.17707	0.165516	0.0125262	0.149306	0.198005	0.308258	0.27828	0.245604	0.421304	0.191584	0	0.180017	0.17534	0.16923	0.181358	0.125487	0.342792	0.157547	0.192372	0.212589	HSC_only
Kctd14	0.0969291	0.108322	0.2221	0.0955034	0.0803315	0.0950752	0.0877073	0.120152	0.099589	0.0948585	0.0655237	0.0475566	0.0331062	0	0.0966586	0	0.0471466	0.0856922	0.0970662	0.0881644	0.102905	0	0.0206905	0.128643	0.0730902	HSC_only
Kdm3a	0.135623	0.152409	0.163504	0.108602	0.121539	0.129624	0.0844285	0.0781241	0.102243	0.0999144	0.151191	0.0999914	0.219032	0.0684272	0.133191	0	0.0850454	0.075973	0.117214	0.110324	0.109836	0	0.0942561	0.107669	0.123215	HSC_only
Khdrbs1	0.727832	1.12326	0.699451	0.814553	0.661325	0.607977	0.89904	0.73319	0.723495	0.532159	0.77188	0.761064	0.824631	0.997541	0.63165	0.953743	0.818076	0.771938	0.711228	0.554726	0.789342	0	0.744291	0.745112	0.635831	HSC_only
Khk	0.430203	0.462358	0.622797	0.491495	0.466621	0.507599	0.579441	0.431116	0.555465	0.524739	0.432599	0.516384	0.387387	0.499532	0.528973	1.75548	0.487312	0.534976	0.591305	0.515501	0.513475	0.208001	0.468673	0.570062	0.424779	HSC_only
Kidins220	0.194422	0.342824	0.211065	0.195802	0.195278	0.186371	0.245586	0.186658	0.170255	0.195333	0.286954	0.249344	0.261338	0.32604	0.205078	0	0.152727	0.243867	0.199422	0.186698	0.304038	0	0.22517	0.256389	0.232324	HSC_only
Kif16b	0.0923637	0.0921425	0	0.106398	0.0898901	0.104769	0.0632097	0.0712063	0.103193	0.100398	0.1618	0.131528	0.223686	0.067896	0.108899	0	0.0841664	0.101044	0.105584	0.103301	0.0753565	0	0.102425	0.108974	0.108639	HSC_only
Kif5b	0.633897	0.829799	0.692172	0.608123	0.565682	0.52248	0.63795	0.358186	0.532071	0.439053	0.709322	0.655503	0.783456	0.656397	0.507254	0.953743	0.601629	0.412783	0.559217	0.481645	0.698843	1.24725	0.63265	0.590762	0.575466	HSC_only
Klf16	0.134781	0.121377	0.194458	0.117806	0.0949068	0.0926066	0.155067	0.0923662	0.104163	0.0624257	0.0881887	0.17155	0.167303	0.202506	0.105914	0	0.16846	0.0924149	0.0908077	0.0555082	0.0531026	0.354456	0.0297603	0.0742674	0.0704738	HSC_only
Klhl2	0.179447	0.16948	0.077702	0.172323	0.178147	0.140415	0.154891	0.132604	0.131809	0.134779	0.159253	0.20089	0.199023	0.248324	0.126746	0	0.111239	0.0749772	0.135427	0.138083	0.20364	0.208001	0.249522	0.141601	0.201438	HSC_only
Klhl22	0.0910688	0.132777	0.201364	0.0904339	0.0969509	0.0839672	0.183959	0.0881231	0.105888	0.102617	0.102031	0.0570033	0.0680663	0.077359	0.0982128	0.953743	0.0604314	0.0420395	0.0985057	0.0895016	0.168479	0.342792	0.0456696	0.0910641	0.114258	HSC_only
Kmt2c	0.36096	0.389162	0.1704	0.309866	0.34158	0.340203	0.250038	0.191062	0.308457	0.302927	0.473122	0.426887	0.393516	0.207873	0.361067	0	0.268477	0.333622	0.321466	0.32468	0.45299	0	0.341955	0.376631	0.3966	HSC_only
Kmt2d	0.140194	0.186529	0.048515	0.143822	0.135275	0.137424	0.116218	0.148609	0.126837	0.116265	0.277741	0.22224	0.254953	0.298262	0.143455	0	0.147161	0.188254	0.120187	0.136938	0.272392	0.467589	0.211666	0.245299	0.200798	HSC_only
Kpna4	0.481579	0.419291	0.55241	0.491958	0.452775	0.384024	0.37597	0.500179	0.392492	0.346619	0.556206	0.528132	0.489422	0.546803	0.366953	0	0.473868	0.429343	0.387392	0.330783	0.472248	0.342792	0.555494	0.475831	0.398426	HSC_only
Krr1	0.323591	0.418285	0.46021	0.315238	0.273908	0.317137	0.259182	0.231585	0.287147	0.247674	0.215018	0.210871	0.290997	0.214883	0.280148	0	0.353868	0.285001	0.28385	0.246949	0.369382	0	0.270666	0.255428	0.291982	HSC_only
Lactb2	0.0997833	0.104804	0.204574	0.120109	0.0891982	0.116112	0.164315	0.156626	0.132281	0.114523	0.143583	0.122986	0.171601	0.0605616	0.100439	0	0.153848	0.0858427	0.127851	0.111766	0.141418	0.208001	0.0807714	0.141491	0.142179	HSC_only
Lag3	0.0627901	0.03596	0.0933853	0.0515978	0.0673255	0.0668703	0.056952	0.0710982	0.039406	0.0467645	0.100423	0.0977117	0.0482695	0.0748264	0.0618495	0	0.0126322	0.149237	0.0588095	0.06561	0.0255876	0	0.178571	0.0810089	0.0566861	HSC_only
Lamtor2	0.625139	0.833754	0.718641	0.676353	0.643836	0.664681	0.940438	0.443747	0.781862	0.646094	0.625114	0.541043	0.67171	0.239453	0.681772	1.43289	0.863928	0.633852	0.762109	0.647596	0.498906	0.898713	0.503507	0.671862	0.630028	HSC_only
Lancl3	0.0465946	0.0314037	0	0.0379521	0.0586634	0.0587963	0.0239443	0.0686382	0.0496639	0.0656682	0.117478	0.1339	0.0818418	0.107421	0.0524648	0	0.0415317	0.105968	0.0388677	0.0745095	0.101434	0	0.0798618	0.0599655	0.0959712	HSC_only
Lars	0.342868	0.453391	0.389155	0.485382	0.257563	0.253682	0.37	0.29389	0.323151	0.229479	0.319415	0.24839	0.34573	0.223458	0.215806	0	0.382957	0.172883	0.312483	0.204551	0.23235	0.550793	0.285925	0.360618	0.266334	HSC_only
Lcmt1	0.141382	0.278838	0.179267	0.176156	0.161821	0.234995	0.340674	0.203014	0.236931	0.20527	0.202242	0.190194	0.192657	0.150264	0.218296	0	0.284237	0.193597	0.247356	0.222393	0.239296	0	0.141329	0.218701	0.185989	HSC_only
Ldah	0.264218	0.224788	0.575932	0.254559	0.233289	0.245587	0.268358	0.117147	0.238575	0.250437	0.24132	0.208482	0.154254	0.156748	0.23585	0	0.176261	0.294752	0.253229	0.244805	0.236092	0.208001	0.198812	0.336013	0.259986	HSC_only
Leo1	0.244015	0.31474	0.190354	0.252282	0.224099	0.220612	0.335505	0.272536	0.236492	0.178161	0.154357	0.143762	0.196123	0.172158	0.217321	0.953743	0.246931	0.208151	0.234592	0.176862	0.197654	0.208001	0.223176	0.268921	0.1781	HSC_only
Lgals8	0.231058	0.238562	0.568319	0.192578	0.234725	0.227851	0.173177	0.258604	0.209972	0.219412	0.3366	0.322265	0.237284	0.201327	0.249262	1.43289	0.201687	0.351512	0.21074	0.24104	0.284336	0.208001	0.442524	0.308869	0.291606	HSC_only
Lin9	0.06452	0.209118	0.0376498	0.0776528	0.0636956	0.055048	0.198536	0.0337605	0.10174	0.0661238	0.0492238	0.0560749	0.0646185	0.0976555	0.0646751	0	0.22012	0.0537651	0.0929704	0.0648014	0.124814	0.208001	0.0636654	0.120673	0.113501	HSC_only
Lman2	0.581393	0.714001	0.502921	0.75729	0.583687	0.466544	0.623383	0.412457	0.50181	0.486553	0.707886	0.5225	0.669308	0.521301	0.475447	0.953743	0.537567	0.455217	0.57263	0.479775	0.454253	0.704924	0.430983	0.547268	0.467305	HSC_only
Lmbr1l	0.0496595	0.0305423	0.077201	0.0295048	0.0534555	0.0644444	0.013147	0.112103	0.0352186	0.0517327	0.0648202	0.078961	0.0763703	0.140477	0.0497882	0	0.026933	0.0488052	0.0392734	0.0514171	0.0727427	0	0.0605895	0.0558417	0.0561392	HSC_only
Lmbrd1	0.220574	0.152995	0.213164	0.142758	0.214409	0.229326	0.168653	0.13656	0.156354	0.226608	0.247121	0.261417	0.210775	0.271398	0.237855	0	0.16665	0.265548	0.176237	0.255211	0.243685	0	0.235586	0.217022	0.313554	HSC_only
Lmf1	0.077779	0.0689294	0	0.0747207	0.0612172	0.0867648	0.0886414	0.0490476	0.0939141	0.0750152	0.0642016	0.0831303	0.0659619	0.0726566	0.0860326	0	0.115721	0.0582837	0.0935828	0.0754581	0.116653	0	0.0660089	0.0749652	0.04534	HSC_only
Lmnb2	0.0721214	0.293467	0	0.129693	0.0685709	0.0561643	0.298447	0.0996902	0.109391	0.0657795	0.0548649	0.0489077	0.106354	0.0347822	0.0566165	0	0.335852	0.0427588	0.102091	0.0634626	0.0547267	0.550793	0.0665747	0.088092	0.0441166	HSC_only
Lpcat3	0.299177	0.311543	0.408369	0.317806	0.306649	0.267372	0.218039	0.179713	0.268786	0.27322	0.396199	0.31005	0.390915	0.377409	0.244394	0	0.437414	0.223863	0.265243	0.273764	0.221159	0.208001	0.266923	0.285884	0.317575	HSC_only
Lpin2	0.237165	0.412483	0.357344	0.251832	0.250339	0.233745	0.218706	0.289003	0.21466	0.231155	0.363114	0.336529	0.371611	0.264945	0.239209	0.953743	0.20903	0.321834	0.237164	0.246664	0.300438	0.550793	0.441401	0.298007	0.348809	HSC_only
Lpp	0.26788	0.177367	0.191077	0.250971	0.237584	0.265414	0.172626	0.320336	0.230378	0.252699	0.317311	0.354114	0.322542	0.271698	0.263727	0	0.143359	0.235767	0.230504	0.25009	0.333224	0.354456	0.278364	0.260637	0.306443	HSC_only
Lrch1	0.0788023	0.131825	0.138813	0.0571823	0.0640834	0.082897	0.0888342	0.0971481	0.0712951	0.0783751	0.122514	0.15851	0.125708	0.0812701	0.082738	0	0.0811637	0.139085	0.0757035	0.0761839	0.130965	0	0.15128	0.0776171	0.0887668	HSC_only
Lrch3	0.158342	0.164969	0.20179	0.139181	0.164162	0.115329	0.134427	0.116907	0.127077	0.110353	0.170415	0.195546	0.156994	0.179177	0.146128	0	0.102248	0.162909	0.129981	0.144075	0.140053	0	0.163324	0.144767	0.140464	HSC_only
Lrp8	0.0609444	0.0795458	0	0.0732772	0.0372236	0.0515598	0.0785616	0	0.0817927	0.0420896	0.0378437	0.0444995	0.0559051	0	0.0458876	0	0.0647338	0.0269128	0.0749938	0.0359274	0.0763371	0	0.0162179	0.0664456	0.0329409	HSC_only
Lrrc42	0.199695	0.239049	0.11915	0.237404	0.169803	0.132106	0.327613	0.161336	0.196289	0.11974	0.126828	0.131151	0.13675	0.124751	0.135371	0	0.235959	0.173295	0.195741	0.125584	0.0983099	0	0.0924314	0.180025	0.124472	HSC_only
Lrrc8a	0.142589	0.204918	0.152329	0.107202	0.132571	0.158352	0.169149	0.104268	0.121277	0.133664	0.382091	0.286862	0.230394	0.326174	0.155476	0	0.112441	0.21502	0.128879	0.129768	0.189427	0	0.156567	0.172966	0.225402	HSC_only
Lrrk1	0.221603	0.170454	0.15881	0.201499	0.207106	0.220958	0.120866	0.225651	0.188323	0.203482	0.32781	0.237268	0.296489	0.222001	0.204194	0	0.172071	0.268998	0.213102	0.210006	0.25405	0	0.185518	0.236673	0.206867	HSC_only
Lrwd1	0.171052	0.415818	0.199727	0.188947	0.159811	0.205762	0.401351	0.227175	0.227366	0.206662	0.163758	0.164944	0.170529	0.116117	0.214289	0	0.490191	0.164244	0.224824	0.201604	0.218562	0.697248	0.155784	0.235838	0.213471	HSC_only
Lsm3	0.726657	1.16509	0.847882	0.80038	0.710855	0.792146	1.31624	0.764072	0.934738	0.777899	0.739376	0.667098	0.79427	0.55043	0.802831	1.43289	1.25729	0.822829	0.928625	0.766974	0.76236	1.18186	0.560969	0.819775	0.704605	HSC_only
Lsm4	0.795974	1.26282	0.883052	0.858125	0.761948	0.747823	1.22435	0.765682	0.857074	0.719311	0.680668	0.734391	0.844226	0.608765	0.73635	0	1.07805	0.838816	0.897945	0.741079	0.673738	1.35715	0.743465	0.844525	0.700515	HSC_only
Lsm5	0.485194	0.74738	0.516568	0.550067	0.464072	0.467823	0.749721	0.615361	0.540306	0.455421	0.62624	0.638435	0.696377	0.486253	0.443928	0.953743	0.677129	0.389022	0.496608	0.429944	0.548643	0.550793	0.435043	0.593826	0.528653	HSC_only
Lsm6	0.491149	1.0207	0.433545	0.628165	0.455138	0.428957	0.957939	0.480975	0.590432	0.415457	0.41521	0.470001	0.629151	0.376304	0.407618	0	0.754237	0.521596	0.58253	0.362732	0.366923	0.208001	0.454013	0.529754	0.394048	HSC_only
Ltbp3	0.176263	0.113618	0.108486	0.157497	0.167652	0.196506	0.156756	0.169538	0.200672	0.187473	0.23637	0.306253	0.243918	0.241354	0.169187	0	0.096353	0.106473	0.184728	0.169174	0.199264	0	0.176478	0.173208	0.204714	HSC_only
Ltv1	0.372228	0.450747	0.266883	0.51199	0.2768	0.195428	0.222705	0.117422	0.341525	0.153426	0.177501	0.214933	0.321257	0.211443	0.200438	0	0.266023	0.276594	0.326239	0.156403	0.23174	0.559788	0.268161	0.341211	0.121417	HSC_only
Lurap1	0.0568346	0.132496	0.0770251	0.0471448	0.0753001	0.0706888	0.0734791	0.0638182	0.0556705	0.0780981	0.035779	0.0341933	0.0425316	0.0309234	0.0733812	0	0.073745	0.0692377	0.0543421	0.0698808	0.0876626	0	0.0139966	0.0459258	0.0691786	HSC_only
Luzp1	0.170411	0.203569	0.193291	0.169662	0.138675	0.104988	0.148109	0.145206	0.133554	0.0955469	0.186984	0.20677	0.187244	0.0644834	0.122412	0	0.204798	0.14695	0.128465	0.0920008	0.0648945	0	0.426239	0.132688	0.118772	HSC_only
Lyar	0.454307	0.734697	0.321891	0.637835	0.362379	0.349345	0.86058	0.447179	0.517848	0.329618	0.304944	0.346292	0.636549	0.23458	0.327156	0.953743	0.834502	0.347853	0.469591	0.317741	0.263033	0.467589	0.382327	0.474847	0.319407	HSC_only
Mad2l1	0.049368	0.660193	0.0345868	0.0517873	0.0460511	0.0535329	0.587429	0.0166373	0.082551	0.0535093	0.0568295	0.0507661	0.0691195	0.0768916	0.0648791	0	0.535702	0.0436229	0.0709782	0.0540453	0.0473942	0.208001	0.0613129	0.0709588	0.0436733	HSC_only
Mad2l2	0.137813	0.16958	0.21288	0.202335	0.142697	0.114245	0.175967	0.109863	0.162773	0.117421	0.0812285	0.11708	0.138734	0.272215	0.111144	0	0.188072	0.140615	0.164968	0.124297	0.101747	0.208001	0.115587	0.15221	0.0888206	HSC_only
Mafk	0.151928	0.0753242	0.11566	0.108298	0.0996484	0.207336	0.0910474	0.168675	0.129342	0.100191	0.272004	0.259507	0.267138	0.150882	0.216264	0	0.100183	0.249444	0.139753	0.0892352	0.221127	0.544258	0.281816	0.129008	0.110221	HSC_only
Maged1	0.361552	0.258399	0.372997	0.349337	0.341589	0.36655	0.271701	0.230058	0.348315	0.353773	0.57299	0.43583	0.441796	0.544208	0.366215	0	0.316551	0.365618	0.322066	0.314903	0.320708	0.550793	0.333961	0.394278	0.332046	HSC_only
Magt1	0.331597	0.561316	0.340891	0.384771	0.298451	0.280997	0.501633	0.235169	0.334502	0.25717	0.265331	0.239618	0.268502	0.182428	0.269344	0	0.420751	0.323932	0.337223	0.273674	0.285728	0.898713	0.27755	0.356796	0.296157	HSC_only
Malat1	5.05718	4.33349	5.08136	4.81968	5.05567	5.09567	4.19566	5.11491	4.80799	5.06968	5.21554	5.0662	4.92924	5.07475	4.98977	4.19587	4.12939	5.03864	4.73962	5.00089	5.29583	4.36144	5.13341	5.15108	5.34982	HSC_only
Mamdc2	0.138261	0.0428312	0.0407954	0.0734783	0.167335	0.170865	0.106517	0.126031	0.121054	0.220267	0.317418	0.251276	0.168607	0.477135	0.159775	0	0.0810391	0.0957428	0.0966479	0.205464	0.243032	0	0.146469	0.144227	0.277997	HSC_only
Maml2	0.0936422	0.0990407	0.0917199	0.0601156	0.0871675	0.112002	0.0842811	0.11483	0.0828427	0.105677	0.145243	0.128587	0.146097	0.133268	0.114238	0	0.0543183	0.104447	0.095806	0.130987	0.107817	0	0.114312	0.144738	0.150556	HSC_only
Man2b2	0.0566927	0.111076	0	0.0621593	0.0640658	0.0580133	0.0958477	0	0.067367	0.0653428	0.138321	0.104255	0.0836205	0.192059	0.0640976	0	0.0523914	0.0438073	0.0690826	0.0673143	0.0906932	0	0.0811704	0.116271	0.08996	HSC_only
Map2k1	0.202618	0.179123	0.286656	0.198514	0.263025	0.228287	0.2329	0.317596	0.229799	0.24096	0.369566	0.332238	0.363547	0.369453	0.233631	0	0.274601	0.399758	0.229346	0.267686	0.296648	0	0.514104	0.277658	0.230248	HSC_only
Map4k1	0.121852	0.277319	0.207805	0.181501	0.085432	0.142215	0.196567	0.13325	0.202342	0.119605	0.118399	0.131984	0.169258	0.0564862	0.125511	0	0.198679	0.131709	0.186401	0.107026	0.109189	0.354456	0.154538	0.214238	0.112699	HSC_only
Map4k4	0.39387	0.44198	0.520695	0.327006	0.371899	0.347549	0.293895	0.264206	0.295601	0.325366	0.533587	0.452266	0.480777	0.369617	0.395404	0	0.297934	0.398558	0.316614	0.338403	0.458058	0.550793	0.27481	0.411843	0.345523	HSC_only
Map4k5	0.100943	0.0695519	0.0784451	0.0843643	0.0718092	0.092727	0.0807629	0.0785921	0.0813464	0.0853892	0.104736	0.0896079	0.0926138	0.240613	0.0880307	0	0.119396	0.160706	0.0736017	0.0788225	0.0979188	0	0.0446642	0.0805441	0.114073	HSC_only
Map9	0.0786596	0.0338792	0.0687624	0.100415	0.0582417	0.086648	0.068913	0.0443134	0.0873844	0.0685729	0.102857	0.177898	0.1289	0	0.103076	0	0.0725619	0.0641074	0.0881294	0.0618442	0.0742721	0	0.0536432	0.123617	0.0864768	HSC_only
Mapk14	0.328111	0.559374	0.343999	0.369851	0.316311	0.391007	0.43388	0.336592	0.398456	0.348804	0.42836	0.280023	0.438182	0.290905	0.39228	0	0.414286	0.323266	0.383787	0.390521	0.423045	0.752259	0.231336	0.419113	0.386302	HSC_only
Mapre1	0.708844	0.989242	0.752828	0.743158	0.574377	0.645373	0.951027	0.602966	0.658977	0.516688	0.735484	0.763222	0.74044	0.803211	0.717583	0.953743	0.831426	0.568723	0.639997	0.523475	0.693001	1.35715	0.707435	0.711372	0.546265	HSC_only
Marc2	0.720543	0.956601	0.885964	0.765665	0.744958	0.726051	0.81987	0.960329	0.814932	0.731009	0.749261	0.685031	0.752442	0.564489	0.732467	1.75548	0.760722	0.783441	0.822676	0.724005	0.696252	1.01185	0.693023	0.740146	0.781195	HSC_only
March6	0.17229	0.229105	0.0728106	0.182542	0.191217	0.203889	0.0942723	0.0827114	0.191055	0.19262	0.288142	0.270793	0.228137	0.137144	0.194191	0	0.200603	0.23881	0.184457	0.203408	0.250291	0	0.216115	0.220573	0.228918	HSC_only
March7	0.440789	0.361171	0.458719	0.362375	0.385248	0.42514	0.401094	0.331956	0.371401	0.379875	0.605345	0.504532	0.438511	0.503473	0.464698	0	0.442254	0.343428	0.410578	0.416099	0.496978	0.354456	0.418605	0.436585	0.47475	HSC_only
Mark4	0.155315	0.163491	0.139777	0.136104	0.152373	0.0960182	0.0809717	0.120469	0.0977076	0.106809	0.182336	0.201461	0.227437	0.218804	0.114499	0	0.0865599	0.0765726	0.109628	0.115499	0.13108	0	0.143488	0.138516	0.123819	HSC_only
Mars	0.18126	0.427995	0.12043	0.374367	0.175218	0.093555	0.29261	0.0875256	0.208149	0.0849883	0.0953633	0.10823	0.181582	0.0934312	0.0890021	0	0.220223	0.0865748	0.180767	0.0787442	0.0897698	0.697248	0.0937625	0.196763	0.0875091	HSC_only
Mars2	0.0353835	0.046253	0	0.0524204	0.0230569	0.0349455	0.0250116	0.0430044	0.0524508	0.0290371	0.0301237	0.0792126	0.0648669	0	0.0365288	0	0.0897818	0.0175133	0.0542587	0.036028	0.0526027	0	0.0387383	0.0717506	0.0381301	HSC_only
Matr3	0.948737	0.988828	1.01621	0.984695	0.934358	0.885215	1.16322	0.890762	0.945505	0.879179	1.1191	1.14503	1.22117	1.17518	0.94996	1.43289	1.14034	0.781931	0.985888	0.917412	1.06073	0.90258	0.78548	1.03916	1.08192	HSC_only
Maz	0.613678	0.765443	0.484752	0.697979	0.519049	0.569013	0.87849	0.38575	0.70012	0.577388	0.635977	0.590699	0.793938	0.378501	0.567528	0.953743	0.875888	0.50257	0.716891	0.564148	0.600167	1.01185	0.356725	0.638251	0.512379	HSC_only
Mb21d1	0.0573269	0.301853	0.136771	0.108778	0.071184	0.0547169	0.227521	0.209664	0.10705	0.0577529	0.0589396	0.0520289	0.0894874	0.048273	0.0419964	0.953743	0.242542	0.159972	0.106439	0.0560404	0.264859	0.550793	1.20736	0.22949	0.167318	HSC_only
Mbd2	0.530966	0.790841	0.544459	0.520951	0.473673	0.414405	0.554624	0.499601	0.422835	0.394472	0.565381	0.627433	0.575448	0.575363	0.4216	0.953743	0.585841	0.391056	0.416809	0.398957	0.495404	0.898713	0.618727	0.482306	0.446785	HSC_only
Mbd3	0.65729	0.889802	0.575861	0.857461	0.612437	0.504937	0.830147	0.451448	0.701841	0.46968	0.461692	0.613192	0.664175	0.462385	0.526373	1.43289	0.741542	0.55926	0.694418	0.478766	0.423976	0.354456	0.349888	0.632708	0.44633	HSC_only
Mbd6	0.159274	0.225619	0.149063	0.14475	0.163257	0.192723	0.222237	0.18407	0.197733	0.173379	0.144313	0.118527	0.0854041	0.110633	0.202404	0.953743	0.225522	0.186685	0.187003	0.200093	0.216555	0.898713	0.118415	0.160967	0.249442	HSC_only
Mbnl2	0.427394	0.316613	0.521863	0.345568	0.416121	0.495064	0.410884	0.652902	0.417524	0.493043	0.631699	0.489544	0.547262	0.704298	0.547711	0.953743	0.336688	0.61401	0.431154	0.510883	0.738319	0.208001	0.934649	0.589168	0.657776	HSC_only
Mboat7	0.191794	0.165932	0.20495	0.169081	0.214338	0.207862	0.196357	0.0876582	0.200559	0.198245	0.240772	0.246308	0.295725	0.508116	0.197167	0	0.166807	0.0411591	0.182742	0.202008	0.188643	0.342792	0.185744	0.201569	0.225448	HSC_only
Mbp	0.248921	0.277915	0.359929	0.227887	0.212942	0.257466	0.280544	0.211297	0.260553	0.244471	0.176566	0.210697	0.238522	0.273191	0.247567	0	0.214646	0.31445	0.242005	0.239471	0.256867	0	0.147995	0.227913	0.18248	HSC_only
Mbtps1	0.266106	0.392442	0.386737	0.236553	0.261859	0.252794	0.238123	0.200016	0.242433	0.244043	0.357146	0.345346	0.304128	0.293092	0.251195	0.953743	0.338983	0.220331	0.250208	0.264718	0.273716	0.208001	0.220481	0.30195	0.329118	HSC_only
Mcm4	0.139865	0.538901	0.0407954	0.248181	0.121524	0.124575	0.606236	0.157925	0.300226	0.113708	0.160417	0.136753	0.218225	0	0.136306	0	0.583349	0.0987596	0.277372	0.113841	0.110386	0.208001	0.168486	0.220369	0.113607	HSC_only
Mcmbp	0.200369	0.422597	0.115774	0.258292	0.190585	0.168167	0.344417	0.179203	0.245869	0.161906	0.232891	0.20401	0.265473	0.239467	0.158291	0	0.288119	0.19406	0.243666	0.163072	0.212024	0.354456	0.168713	0.264688	0.235475	HSC_only
Mcrip2	0.153639	0.194114	0.165238	0.262199	0.145115	0.112319	0.119973	0.0980316	0.181395	0.0950633	0.0625911	0.104711	0.161237	0.0346078	0.104801	0	0.110756	0.11383	0.180031	0.0946917	0.0560331	0.208001	0.0529966	0.13189	0.083765	HSC_only
Mcts1	0.37751	0.497022	0.577853	0.448389	0.411932	0.358603	0.446803	0.331519	0.424689	0.354692	0.284846	0.292656	0.459722	0.251669	0.367061	0	0.336106	0.298408	0.446934	0.360462	0.475821	0.550793	0.331965	0.40905	0.370059	HSC_only
Mdfi	0.219998	0.171618	0.309784	0.265029	0.154905	0.215557	0.224304	0.0915149	0.286131	0.173412	0.207242	0.174344	0.308157	0.0824295	0.219781	0.953743	0.310057	0.111082	0.299827	0.210646	0.227064	0.559788	0.102527	0.276141	0.203049	HSC_only
Mdh2	0.9577	1.23413	0.906844	1.12997	0.885206	0.821199	1.09744	0.746614	1.03409	0.779027	0.903865	0.898496	1.10054	0.743914	0.838561	0	1.28032	0.763346	1.01404	0.808307	0.676892	0.810381	0.78956	0.934729	0.723261	HSC_only
Mea1	0.322993	0.302102	0.288319	0.391639	0.301631	0.268717	0.342604	0.310957	0.333587	0.281727	0.191544	0.286909	0.334237	0.340043	0.286572	0	0.373913	0.307946	0.342167	0.289968	0.331724	0.354456	0.256294	0.359389	0.269349	HSC_only
Meaf6	0.264478	0.553345	0.195573	0.330566	0.241497	0.239332	0.60609	0.290834	0.302444	0.235322	0.175674	0.208775	0.294796	0.122447	0.235732	0	0.425647	0.282559	0.302246	0.236746	0.18569	0.208001	0.254448	0.305041	0.253655	HSC_only
Mecp2	0.226514	0.175331	0.393948	0.237928	0.264988	0.259788	0.236536	0.196998	0.24201	0.244149	0.515135	0.327859	0.318807	0.326509	0.27125	0	0.27679	0.154519	0.241095	0.245026	0.327117	0	0.214279	0.292558	0.306744	HSC_only
Med13	0.221148	0.303919	0.139025	0.198526	0.195256	0.193064	0.192318	0.287174	0.176202	0.171298	0.282268	0.225153	0.267819	0.481044	0.221008	0	0.192004	0.294161	0.183425	0.192237	0.259798	0.550793	0.340865	0.22705	0.244742	HSC_only
Med16	0.178185	0.188041	0.274303	0.169785	0.173594	0.187037	0.180309	0.197882	0.16372	0.166865	0.267876	0.246752	0.261954	0.291016	0.186555	0	0.256491	0.0768138	0.164978	0.158894	0.216968	0.697248	0.157842	0.178819	0.196956	HSC_only
Med18	0.0473915	0.087563	0.152574	0.0542443	0.0437969	0.0375461	0.119832	0.0212974	0.0632835	0.047027	0.0293203	0.0383078	0.0198451	0	0.0306042	0	0.104388	0.0141342	0.0565051	0.0403162	0.023097	0.550793	0.019634	0.0546349	0.0809696	HSC_only
Med19	0.253739	0.464996	0.372672	0.31425	0.264667	0.211487	0.428469	0.20403	0.26822	0.221129	0.168026	0.159488	0.180738	0.172405	0.21838	0	0.324534	0.319893	0.255714	0.252394	0.163393	0.559788	0.228641	0.246695	0.230672	HSC_only
Med28	0.541189	0.616706	0.620437	0.545708	0.521407	0.479766	0.644145	0.58575	0.519589	0.541023	0.466108	0.457471	0.523669	0.504056	0.500787	0.953743	0.612888	0.649284	0.553552	0.535929	0.5312	0.208001	0.52205	0.534077	0.592836	HSC_only
Med29	0.304886	0.310119	0.475095	0.370721	0.289108	0.292187	0.303997	0.276603	0.31408	0.22592	0.221801	0.19581	0.321638	0.252307	0.294253	0.953743	0.34221	0.302535	0.310484	0.238374	0.25629	0.550793	0.180764	0.264524	0.2475	HSC_only
Med8	0.304829	0.417112	0.395684	0.377119	0.255303	0.25867	0.338367	0.230886	0.310265	0.243545	0.217071	0.219591	0.277929	0.303122	0.24068	0	0.467396	0.21172	0.294364	0.250161	0.279623	0.354456	0.173123	0.296948	0.242381	HSC_only
Metrn	0.0431113	0.169745	0	0.0826458	0.0454705	0.0549508	0.241845	0.0723327	0.119866	0.0491726	0.0522437	0.0654019	0.0868432	0.0657057	0.0531016	0	0.222742	0.0466867	0.107326	0.0546276	0.0893439	0.354456	0.0372511	0.0566423	0.0355942	HSC_only
Mettl1	0.639541	0.379823	0.557326	0.78907	0.527266	0.369389	0.312307	0.346555	0.605318	0.319485	0.238047	0.418592	0.560227	0.127297	0.386302	0.953743	0.274123	0.399447	0.593936	0.341231	0.392283	0.354456	0.294647	0.55374	0.359	HSC_only
Mettl13	0.134843	0.121912	0.225698	0.161973	0.116541	0.086726	0.0821934	0.117398	0.131398	0.0895784	0.0629407	0.0505036	0.118674	0	0.0743573	0	0.045521	0.111525	0.109998	0.0915763	0.062918	0.208001	0.0527091	0.11951	0.0969804	HSC_only
Mettl17	0.0357313	0.0653662	0.109566	0.0441229	0.0400106	0.0390476	0.0542561	0.0792904	0.0465199	0.0430948	0.0388207	0.0437456	0.0184804	0.0407381	0.0403859	0	0.0181785	0.0138924	0.0558682	0.0573411	0.0603879	0	0.0475519	0.0664399	0.0624915	HSC_only
Mfap2	0.0685008	0.0543804	0	0.0420645	0.0795317	0.0854193	0.123194	0.0958961	0.0637567	0.104782	0.0899201	0.135077	0.0956729	0.202701	0.083714	0	0.022687	0.226082	0.0592354	0.0889181	0.068249	0.208001	0.0652709	0.0786504	0.0660899	HSC_only
Mfng	0.677986	0.592495	0.482195	0.677343	0.683993	0.700605	0.628748	0.481813	0.69123	0.692858	0.814131	0.836873	0.718504	0.727581	0.682819	2.19467	0.569511	0.557071	0.699841	0.698898	0.507674	0.810381	0.480855	0.632169	0.626054	HSC_only
Mfsd10	0.378317	0.715384	0.424308	0.479792	0.364748	0.414712	0.660046	0.270721	0.499058	0.40117	0.390151	0.375162	0.435865	0.373434	0.402583	0.953743	0.593131	0.449744	0.517576	0.428453	0.442229	0.704924	0.357965	0.456777	0.454398	HSC_only
Mgst1	0.172128	0.127255	0.196406	0.103906	0.201182	0.260362	0.112139	0.291246	0.123989	0.260323	0.32025	0.192589	0.104496	0.366596	0.26836	0	0.0935812	0.266884	0.129066	0.300283	0.263006	0	0.180462	0.129424	0.337479	HSC_only
Mib1	0.202179	0.119173	0.119463	0.189854	0.152271	0.181081	0.163432	0.214311	0.177938	0.156076	0.346536	0.289193	0.233345	0.111654	0.197056	0	0.241049	0.104551	0.191889	0.148756	0.236498	0.208001	0.190019	0.225759	0.19872	HSC_only
Miip	0.0746755	0.247344	0.124768	0.0579459	0.0860966	0.0693307	0.204054	0.0207483	0.0748281	0.0876507	0.0580913	0.0774485	0.0802051	0.0974145	0.0756155	0	0.254029	0.0748101	0.0822315	0.0841756	0.106053	0	0.0631685	0.114222	0.112532	HSC_only
Minos1	0.724202	1.20376	0.695633	0.870403	0.701946	0.615208	1.11293	0.7465	0.824115	0.627482	0.654152	0.724569	0.741061	0.783049	0.611723	1.43289	1.18157	0.73613	0.787798	0.556815	0.665272	1.04772	0.636966	0.719844	0.572793	HSC_only
Minpp1	0.37215	0.382104	0.432582	0.443649	0.331327	0.324355	0.452682	0.409239	0.388651	0.317852	0.474969	0.561778	0.598982	0.319202	0.347714	0	0.419243	0.388833	0.374815	0.317285	0.302618	0.208001	0.532806	0.410079	0.364546	HSC_only
Mir155hg	0.08278	0.134593	0.0391254	0.0733895	0.0791591	0.0999802	0.065158	0.125367	0.0836958	0.0827861	0.104916	0.133098	0.103199	0.104142	0.0932897	0	0.056005	0.037537	0.084321	0.0818589	0.0753612	0.544258	0.398627	0.104627	0.088988	HSC_only
Mirt1	0.0394718	0	0	0.0145848	0.0494677	0.056801	0.012827	0.0207483	0.0326923	0.0675635	0.0965379	0.102152	0.0608463	0.15104	0.0673627	0	0.0104937	0.0875005	0.0349984	0.0732386	0.146415	0	0.058674	0.0316605	0.0902755	HSC_only
Mlkl	0.0864572	0.150507	0.150216	0.107769	0.085325	0.0882616	0.210418	0.329028	0.10519	0.084284	0.048968	0.06791	0.114791	0.0309234	0.068835	0	0.144437	0.156236	0.0919187	0.0767707	0.0847978	0.342792	0.407905	0.122753	0.0558356	HSC_only
Mmaa	0.0408212	0.0744737	0.135239	0.0367059	0.0412624	0.0551886	0.0670976	0.0650978	0.0735176	0.065905	0.0260291	0.0216645	0.0484168	0.0400442	0.0541403	0	0.0943083	0.0164896	0.0692978	0.060234	0.0594919	0	0.0432776	0.0650358	0.051014	HSC_only
Mob1b	0.143386	0.160497	0.124358	0.142501	0.128584	0.115898	0.110688	0.244084	0.112762	0.100294	0.206653	0.156667	0.199089	0.18535	0.118896	0	0.114088	0.128913	0.132984	0.107656	0.188857	0.544258	0.156469	0.125904	0.111515	HSC_only
Mogs	0.339139	0.521912	0.282511	0.437665	0.26184	0.234202	0.497299	0.155942	0.359743	0.205227	0.206675	0.257733	0.347919	0.249916	0.239341	0	0.422755	0.231992	0.370257	0.185524	0.151193	0.697248	0.15735	0.360372	0.215196	HSC_only
Mpp6	0.735279	0.708119	0.639797	0.823339	0.731202	0.641164	0.740004	0.565316	0.704079	0.629453	0.579116	0.652386	0.712695	0.556621	0.629456	0	0.825863	0.601638	0.721471	0.630855	0.63401	0.697248	0.66973	0.721557	0.719814	HSC_only
Mrnip	0.0295301	0.10677	0	0.0369873	0.0279087	0.0354649	0.134685	0.0226027	0.0530554	0.0381812	0.0145449	0.0179976	0.0259025	0	0.0346177	0	0.0824833	0.0579369	0.0535361	0.0411234	0.0457737	0	0.0176578	0.0410579	0.0439059	HSC_only
Mrpl10	0.124252	0.227772	0.0972721	0.15752	0.147845	0.130071	0.177336	0.155462	0.155563	0.144797	0.0742985	0.125896	0.0802727	0.100743	0.143621	0	0.259237	0.158466	0.167564	0.152045	0.182127	0	0.134036	0.157723	0.135416	HSC_only
Mrpl13	0.478476	0.880866	0.283732	0.578128	0.43087	0.432965	0.77925	0.454277	0.574007	0.445972	0.351935	0.416756	0.407817	0.211691	0.462529	0	0.810467	0.441471	0.572619	0.431374	0.411986	0.980396	0.387106	0.499951	0.428523	HSC_only
Mrpl15	0.472904	0.590478	0.348335	0.667589	0.438679	0.429008	0.57445	0.529807	0.532093	0.426362	0.318853	0.37117	0.480653	0.233192	0.404095	1.43289	0.67998	0.382039	0.52397	0.404764	0.40809	0.354456	0.313036	0.463839	0.392853	HSC_only
Mrpl16	0.300262	0.452131	0.339356	0.411206	0.322095	0.251084	0.430472	0.273912	0.330762	0.245402	0.224741	0.222576	0.222157	0.128263	0.242251	0	0.329202	0.35122	0.323314	0.228907	0.212479	0	0.258427	0.308686	0.263075	HSC_only
Mrpl19	0.345038	0.496975	0.295206	0.465084	0.32324	0.272094	0.378948	0.21116	0.362651	0.246674	0.207781	0.2343	0.356286	0.105114	0.241187	0	0.38634	0.132473	0.359981	0.24169	0.324471	0.697248	0.224337	0.370042	0.319449	HSC_only
Mrpl2	0.36938	0.471312	0.383947	0.448413	0.346756	0.340153	0.503384	0.348057	0.420492	0.316118	0.231947	0.263527	0.363997	0.331253	0.327016	0.953743	0.520911	0.341528	0.411335	0.323608	0.294575	0.550793	0.275563	0.373546	0.2508	HSC_only
Mrpl20	0.621757	0.885628	0.495678	0.794062	0.53931	0.474929	0.749843	0.582933	0.660982	0.451876	0.435639	0.528879	0.685228	0.504829	0.462291	0	0.706473	0.432414	0.628237	0.461621	0.52305	0.354456	0.463697	0.574858	0.445491	HSC_only
Mrpl21	0.410854	0.482618	0.243322	0.55738	0.363752	0.351133	0.608577	0.321987	0.478065	0.317521	0.281093	0.304656	0.378827	0.321374	0.350908	0.953743	0.593793	0.29709	0.471586	0.33604	0.318796	0.550793	0.356902	0.409406	0.296911	HSC_only
Mrpl22	0.288589	0.360661	0.20933	0.352677	0.264121	0.215532	0.44447	0.234458	0.270779	0.2215	0.197206	0.145326	0.185989	0.269204	0.242963	0.953743	0.287186	0.144039	0.300909	0.242169	0.209995	0	0.139072	0.259323	0.203007	HSC_only
Mrpl28	0.40981	0.619105	0.532451	0.523119	0.378431	0.386392	0.761362	0.366433	0.497439	0.400436	0.280637	0.334657	0.500051	0.191386	0.383096	0	0.680725	0.329212	0.496777	0.377013	0.370264	0.90258	0.295199	0.421542	0.361096	HSC_only
Mrpl3	0.352073	0.376387	0.265816	0.39725	0.314487	0.29226	0.399533	0.278297	0.342118	0.282598	0.280708	0.260392	0.300708	0.168284	0.283677	0	0.44946	0.280401	0.34533	0.271371	0.267329	0.550793	0.311441	0.360184	0.291332	HSC_only
Mrpl35	0.362494	0.569138	0.539939	0.452886	0.399119	0.360191	0.616558	0.281423	0.398688	0.33588	0.293375	0.244023	0.303649	0.346265	0.359721	0	0.544883	0.231462	0.39435	0.316356	0.339728	0	0.311881	0.355539	0.380672	HSC_only
Mrpl36	0.400261	0.530346	0.240265	0.632398	0.411698	0.331985	0.508422	0.335785	0.507726	0.357977	0.241186	0.306698	0.402915	0.142226	0.33831	0	0.518754	0.290818	0.521552	0.314491	0.27112	0.208001	0.268471	0.486279	0.372316	HSC_only
Mrpl4	0.425119	0.50173	0.452651	0.481348	0.427559	0.382667	0.441367	0.440759	0.462856	0.383975	0.390132	0.392522	0.391504	0.254238	0.389858	0	0.412996	0.42758	0.464664	0.402899	0.434313	1.15505	0.353102	0.438419	0.439997	HSC_only
Mrpl43	0.523854	0.621281	0.548899	0.568592	0.476715	0.429255	0.499675	0.329581	0.488851	0.427746	0.460953	0.394791	0.424662	0.467367	0.423372	0	0.491755	0.454622	0.478379	0.411053	0.384337	0	0.245666	0.528801	0.375626	HSC_only
Mrpl45	0.2733	0.309604	0.102756	0.27536	0.262496	0.236672	0.3464	0.297942	0.27726	0.245613	0.186963	0.18891	0.230398	0.113584	0.243495	0.953743	0.322208	0.134165	0.257366	0.254255	0.259209	0.354456	0.212568	0.253107	0.218463	HSC_only
Mrpl46	0.221401	0.463789	0.257404	0.288104	0.232662	0.194617	0.342624	0.160481	0.238772	0.179163	0.189248	0.207393	0.197877	0.200993	0.192855	0	0.277153	0.15973	0.245297	0.180344	0.145695	0	0.189731	0.254009	0.182026	HSC_only
Mrpl47	0.0969365	0.118635	0.11149	0.112299	0.0682858	0.0767947	0.128019	0.0956051	0.111376	0.079924	0.0412263	0.0621605	0.0824642	0	0.0760379	0	0.112139	0.0440635	0.101193	0.0728281	0.115808	0	0.0585303	0.125488	0.0690984	HSC_only
Mrpl50	0.345486	0.500571	0.293224	0.41421	0.313329	0.263037	0.39995	0.182339	0.354644	0.272601	0.292808	0.291097	0.331529	0.236578	0.28637	0	0.340579	0.312916	0.351451	0.265669	0.32523	0.208001	0.238681	0.356817	0.280679	HSC_only
Mrpl52	1.03906	0.924447	1.11841	1.06577	1.07372	0.949099	0.920797	1.03614	1.01634	0.999983	1.09855	1.1349	1.09759	1.19226	0.868339	1.43289	0.734984	0.889829	0.967773	0.880289	1.13332	0.697248	1.09504	1.24426	1.1667	HSC_only
Mrpl55	0.268554	0.277962	0.322318	0.332164	0.226751	0.216558	0.359668	0.266981	0.280905	0.215482	0.222552	0.222338	0.188909	0.177693	0.211863	0.953743	0.34644	0.205318	0.275056	0.20907	0.242435	0	0.1622	0.252887	0.146561	HSC_only
Mrpl57	0.575343	0.720452	0.491183	0.687434	0.518979	0.509624	0.754657	0.538213	0.62773	0.440885	0.521075	0.533293	0.627157	0.21631	0.480946	0.953743	0.67242	0.543687	0.59425	0.459878	0.538195	0	0.39371	0.587852	0.446353	HSC_only
Mrps11	0.214921	0.379666	0.156639	0.254338	0.180992	0.182774	0.407549	0.140932	0.23485	0.175772	0.103114	0.142835	0.128536	0.0643613	0.185648	1.43289	0.342769	0.159488	0.230688	0.18316	0.163866	0.342792	0.136697	0.206508	0.187492	HSC_only
Mrps12	0.525232	0.570213	0.58194	0.650155	0.498433	0.410169	0.647764	0.474402	0.517329	0.395345	0.318331	0.318933	0.421994	0.137921	0.40987	0.953743	0.738431	0.428364	0.501375	0.412433	0.423555	0.208001	0.311148	0.417381	0.36637	HSC_only
Mrps15	0.466518	0.624813	0.420626	0.560489	0.430676	0.424764	0.576837	0.499574	0.506802	0.406094	0.392875	0.385431	0.489432	0.310512	0.40293	0	0.489038	0.44806	0.496648	0.410226	0.45808	0.550793	0.385261	0.414514	0.420718	HSC_only
Mrps18a	0.401308	0.431858	0.545929	0.489095	0.41009	0.32713	0.467946	0.290566	0.400584	0.327209	0.320739	0.308052	0.374577	0.174928	0.325012	0	0.47149	0.439227	0.392233	0.333743	0.436451	0.208001	0.345171	0.386897	0.341847	HSC_only
Mrps21	0.33778	0.452679	0.360326	0.426059	0.338247	0.358014	0.635034	0.347395	0.462903	0.365211	0.314049	0.365966	0.388272	0.463885	0.351423	0	0.504292	0.313565	0.42599	0.367597	0.539896	0.687464	0.312592	0.490081	0.417434	HSC_only
Mrps23	0.365709	0.561852	0.295421	0.464267	0.354806	0.317137	0.515024	0.233747	0.397628	0.31772	0.334846	0.335624	0.37452	0.201101	0.309637	0.953743	0.453456	0.265046	0.382408	0.333419	0.306568	0.208001	0.259489	0.336972	0.321289	HSC_only
Mrps27	0.095313	0.134659	0.0866239	0.129068	0.0807514	0.0862551	0.0999383	0.0965794	0.100443	0.0695735	0.057773	0.0453088	0.090196	0.0309234	0.0770943	0	0.134593	0.100478	0.105937	0.0800509	0.139781	0	0.0622176	0.135324	0.0801584	HSC_only
Mrps28	0.339698	0.415151	0.473915	0.421884	0.285632	0.26306	0.316187	0.258724	0.411341	0.239927	0.221103	0.283017	0.419117	0.204263	0.280182	0	0.354424	0.361959	0.440173	0.242653	0.234287	0	0.306718	0.391197	0.271598	HSC_only
Mrps34	0.427505	0.336916	0.516136	0.57295	0.453184	0.306784	0.444264	0.363951	0.399624	0.307837	0.262181	0.3437	0.384077	0.364196	0.345564	0	0.473465	0.419386	0.435784	0.328041	0.208454	0.467589	0.254027	0.376641	0.343681	HSC_only
Mrps35	0.277271	0.330617	0.294506	0.328033	0.276431	0.283021	0.400824	0.171001	0.342269	0.275005	0.226232	0.254878	0.307958	0.176247	0.290555	0	0.374863	0.191546	0.325108	0.262835	0.275523	0	0.144823	0.305513	0.244901	HSC_only
Mrps7	0.416573	0.607205	0.463832	0.532266	0.433011	0.327604	0.484112	0.408792	0.422575	0.333558	0.258793	0.330777	0.296451	0.222464	0.330789	0.953743	0.583247	0.432203	0.406723	0.328732	0.244879	0	0.299417	0.411243	0.33758	HSC_only
Mrrf	0.254677	0.29555	0.284711	0.279196	0.226479	0.190983	0.173842	0.145018	0.208452	0.178434	0.251685	0.152929	0.122097	0.0912781	0.207101	0	0.219342	0.230164	0.205685	0.184914	0.139705	0	0.212109	0.225694	0.178083	HSC_only
Msh2	0.284431	0.532398	0.243328	0.381916	0.296274	0.332942	0.629067	0.257426	0.418887	0.335522	0.406563	0.288797	0.421924	0.471225	0.354343	0	0.583949	0.263935	0.40858	0.340407	0.320433	0.208001	0.240734	0.409009	0.316775	HSC_only
Msh3	0.113799	0.291671	0.0425184	0.139989	0.104137	0.143491	0.225448	0.131625	0.171001	0.119504	0.166252	0.109904	0.135187	0.0746337	0.131491	0.953743	0.217633	0.184564	0.173512	0.123676	0.16942	0.544258	0.103153	0.170312	0.170102	HSC_only
Msh6	0.145936	0.284866	0.0976371	0.192875	0.124604	0.137519	0.36528	0.0644795	0.184806	0.101592	0.169308	0.116085	0.254689	0.0683263	0.131638	0	0.383809	0.119242	0.172944	0.112442	0.225792	0.208001	0.102839	0.19382	0.141472	HSC_only
Msl2	0.232036	0.137445	0.215005	0.199605	0.205691	0.219698	0.179038	0.280869	0.19716	0.181731	0.332785	0.26845	0.234936	0.213757	0.214051	0	0.25824	0.212238	0.206765	0.19622	0.37849	0.342792	0.193333	0.220218	0.230735	HSC_only
Msl3	0.203057	0.400767	0.24767	0.212943	0.202325	0.195108	0.349869	0.245904	0.22695	0.201339	0.192206	0.17425	0.23555	0.172259	0.189582	0.953743	0.355174	0.220955	0.242092	0.196339	0.20032	0.550793	0.19086	0.227432	0.227341	HSC_only
Msn	0.887251	0.94421	1.01279	0.819977	0.830763	0.76478	0.745018	0.962622	0.732836	0.771061	1.02078	1.02051	0.896329	1.10996	0.805413	0.953743	0.656853	0.856565	0.751303	0.763345	0.850818	1.24725	1.0541	0.799733	0.920348	HSC_only
Msto1	0.116873	0.165528	0.1616	0.189251	0.111672	0.104573	0.116294	0.1362	0.157291	0.112776	0.0818627	0.0983244	0.153915	0.111826	0.10807	0	0.136131	0.157226	0.16017	0.111423	0.029346	0.208001	0.100007	0.148089	0.103662	HSC_only
Mtch1	0.627843	0.84126	0.543422	0.705837	0.608735	0.613546	0.928071	0.449185	0.729918	0.62309	0.691872	0.698931	0.615258	0.452754	0.578985	0	0.825173	0.451158	0.705845	0.625709	0.535678	1.10704	0.532622	0.671939	0.570118	HSC_only
Mtch2	0.449315	0.64375	0.498226	0.534518	0.444148	0.395492	0.666121	0.484996	0.476779	0.34586	0.346081	0.376805	0.487598	0.245473	0.374601	0	0.66294	0.289531	0.428746	0.363999	0.403392	0.354456	0.3475	0.421351	0.351701	HSC_only
Mtfp1	0.0520647	0.150758	0	0.0779683	0.0466899	0.030322	0.11423	0	0.0741759	0.0335554	0.0167424	0.025825	0.0455425	0	0.040817	0	0.0753151	0.0296806	0.0833317	0.036086	0.0862723	0	0.0098802	0.0798436	0.0294602	HSC_only
Mtg1	0.0939364	0.133754	0.132415	0.0948835	0.0717126	0.109654	0.118826	0.0876021	0.128808	0.103236	0.125001	0.0478332	0.144488	0.0758841	0.118499	0	0.15127	0.0698483	0.131721	0.111529	0.114864	0	0.101063	0.115878	0.0945126	HSC_only
Mthfd1	0.152309	0.25767	0.161485	0.221689	0.113427	0.122983	0.2938	0.0769233	0.225561	0.0973115	0.100071	0.142135	0.27021	0.0407381	0.113361	0	0.303498	0.0878722	0.218919	0.092108	0.0748474	0.354456	0.127278	0.195627	0.0998984	HSC_only
Mthfd1l	0.0523034	0.246075	0	0.113806	0.0402728	0.0629209	0.221449	0.0625081	0.116164	0.0481765	0.0504169	0.0581698	0.151337	0	0.0547475	0	0.18344	0.042367	0.118817	0.0521075	0.0619038	0	0.0591367	0.0968847	0.0372426	HSC_only
Mtss1	0.0746245	0.0481804	0.0794201	0.0751726	0.062273	0.0862702	0.0767002	0.0892386	0.087025	0.0848709	0.110062	0.190828	0.160368	0.147493	0.103321	0	0.128963	0.0681627	0.112413	0.0799538	0.107109	0	0.0800295	0.114429	0.0989042	HSC_only
Mtus2	0.0486307	0.0640962	0	0.0369153	0.0449969	0.0442909	0.0693847	0.090813	0.0457264	0.0481086	0.0388323	0.0236992	0.00532975	0	0.0568674	0	0.0286281	0.0934095	0.0423501	0.04628	0.0747193	0	0.0270532	0.0623861	0.0499315	HSC_only
Mtx1	0.235076	0.308708	0.27365	0.29813	0.240109	0.233039	0.299546	0.272076	0.261414	0.219559	0.184729	0.195374	0.239158	0.196901	0.25247	0	0.280735	0.190914	0.268333	0.226853	0.1891	0.354456	0.209368	0.220826	0.192715	HSC_only
Muc13	0.491626	0.532125	0.3809	0.697028	0.401083	0.418595	0.5341	0.314655	0.489092	0.34527	0.482626	0.467104	0.584867	0.193297	0.378021	0	0.483274	0.329028	0.531069	0.367542	0.43917	0.559788	0.612993	0.557869	0.345561	HSC_only
Mvp	0.347228	0.171048	0.420549	0.2863	0.325666	0.29462	0.0765295	0.429418	0.243823	0.311348	0.392579	0.459238	0.380044	0.37139	0.306741	0	0.0634272	0.391866	0.272698	0.297982	0.431487	0	0.491662	0.278767	0.366791	HSC_only
Mycbp	0.117588	0.231718	0.134158	0.1427	0.110908	0.085316	0.236213	0.0887618	0.142546	0.0924834	0.112316	0.0734772	0.0816361	0	0.0828401	0.953743	0.304953	0.066215	0.109967	0.100471	0.145637	0.208001	0.0932085	0.119682	0.100056	HSC_only
Mycbp2	0.858162	0.721001	0.922021	0.847017	0.812894	0.824343	0.682649	1.07779	0.779971	0.745919	0.924773	0.945392	0.946681	0.980373	0.837534	0	0.685077	1.12168	0.807733	0.762318	1.04854	0.354456	1.11364	1.00574	0.917342	HSC_only
Myg1	0.207358	0.441272	0.236367	0.289047	0.213329	0.221127	0.490494	0.155729	0.287748	0.223809	0.133227	0.104327	0.228538	0.187091	0.2015	0.953743	0.519393	0.146661	0.295659	0.231445	0.178199	0.208001	0.166433	0.222568	0.256391	HSC_only
Myl12a	0.882195	1.08716	0.704773	0.91551	0.764158	0.800647	1.01337	0.742049	0.950731	0.777889	0.704647	0.80924	0.99395	0.609679	0.8658	1.43289	1.06699	0.896602	0.962167	0.809399	0.775332	0.704924	0.832224	0.877317	0.800567	HSC_only
Myl6	2.10759	2.28039	2.0763	2.20561	2.07255	2.11133	2.16855	2.1716	2.22248	2.09516	1.99824	2.10004	2.13758	1.85508	2.11397	2.19467	2.20434	2.11468	2.21227	2.07844	1.92932	2.11291	1.90766	2.09624	1.92396	HSC_only
Myof	0.214672	0.0231187	0.241448	0.156306	0.262813	0.261477	0.091611	0.378738	0.176594	0.241783	0.297296	0.314075	0.20319	0.322314	0.257582	1.43289	0.0743008	0.247559	0.187717	0.277676	0.332673	0	0.301388	0.273552	0.3242	HSC_only
N4bp2	0.332673	0.376399	0.193925	0.239101	0.293697	0.445475	0.34508	0.359787	0.364355	0.440586	0.790846	0.733768	0.509632	0.575128	0.436124	0	0.295137	0.217933	0.362819	0.407069	0.432924	0.752259	0.297704	0.465902	0.442079	HSC_only
Naa20	0.418512	0.617218	0.717324	0.548352	0.396475	0.37285	0.655073	0.551623	0.474996	0.37984	0.312623	0.393386	0.361901	0.210896	0.398737	0	0.629443	0.364407	0.485659	0.362755	0.355303	0.342792	0.601337	0.511132	0.302909	HSC_only
Naa40	0.126916	0.320075	0.0907666	0.149483	0.0973485	0.0941956	0.316446	0.0441892	0.127292	0.0923662	0.0896732	0.0806623	0.132929	0	0.10263	0	0.264221	0.142191	0.141817	0.105602	0.112781	0.354456	0.0608982	0.15314	0.116394	HSC_only
Naa50	0.400813	0.738872	0.339242	0.534947	0.364534	0.318708	0.760683	0.226515	0.45364	0.271141	0.447392	0.304618	0.550053	0.182243	0.278768	0	0.778034	0.292156	0.412645	0.259979	0.330886	0.354456	0.303755	0.472086	0.303036	HSC_only
Nab1	0.326817	0.482219	0.285473	0.358129	0.308203	0.285009	0.289139	0.331962	0.304606	0.280964	0.378618	0.411248	0.423214	0.227835	0.293231	0	0.305597	0.373386	0.298039	0.293987	0.363953	0.467589	0.518857	0.413657	0.412393	HSC_only
Nabp2	0.357193	0.434458	0.282501	0.396621	0.32242	0.382926	0.511548	0.357226	0.45898	0.381617	0.288625	0.353927	0.475274	0.322013	0.401478	0.953743	0.427086	0.412151	0.456999	0.38671	0.364757	0	0.26207	0.362612	0.318923	HSC_only
Nagpa	0.101522	0.115277	0.080765	0.0985523	0.0868867	0.0834687	0.118318	0.0333688	0.108199	0.083137	0.0865557	0.0408883	0.0619561	0.0337368	0.0754574	0	0.0666985	0.0718313	0.0889012	0.0809442	0.0780205	0	0.0700682	0.105379	0.0989174	HSC_only
Naip5	0.0861098	0.0100336	0.0458075	0.0584862	0.0836991	0.0994698	0.0917429	0.0795269	0.0781224	0.0888958	0.14361	0.138722	0.0573934	0.102444	0.110407	0	0.0717372	0.0399704	0.0893697	0.103601	0.0993004	0.342792	0.156782	0.134452	0.113526	HSC_only
Nans	0.161649	0.446875	0.25629	0.265074	0.170191	0.159373	0.435735	0.137343	0.231779	0.142781	0.165172	0.162244	0.163986	0.126658	0.148778	0	0.430376	0.169149	0.233918	0.14308	0.11291	0.208001	0.147701	0.194154	0.173769	HSC_only
Napsa	0.729325	0.617898	0.928992	0.693124	0.698576	0.715813	0.558539	0.766498	0.704808	0.701939	0.809302	0.813569	0.848406	0.967372	0.709422	1.43289	0.485999	0.955897	0.73428	0.743857	0.767061	0.550793	0.97605	0.74781	0.73515	HSC_only
Narf	0.064141	0.0338365	0	0.0457498	0.0668469	0.0931144	0.0951412	0.129324	0.0684768	0.0938715	0.0828199	0.0352357	0.0466915	0.145061	0.0954374	0	0.10623	0.0736396	0.097484	0.089029	0.0666012	0	0.0173642	0.0728612	0.105849	HSC_only
Nasp	0.251497	1.03054	0.191454	0.415004	0.186365	0.13977	0.867539	0.383198	0.378214	0.123953	0.117844	0.115644	0.274524	0.126261	0.139222	0	0.977991	0.157151	0.330919	0.120121	0.153665	0.637604	0.211789	0.220856	0.136228	HSC_only
Nat10	0.139471	0.0563297	0.0883502	0.191391	0.110522	0.0887595	0.113386	0.0945675	0.148578	0.0754171	0.0657205	0.0929106	0.130389	0.0452083	0.086818	0	0.120529	0.0784609	0.158694	0.0676465	0.0877187	0	0.0948408	0.171507	0.0892506	HSC_only
Naxd	0.359006	0.449702	0.384682	0.46069	0.404403	0.347683	0.576532	0.319048	0.445659	0.369649	0.311715	0.368754	0.409692	0.346977	0.370091	0.953743	0.393889	0.269662	0.438949	0.413451	0.397966	0.544258	0.306925	0.439081	0.351698	HSC_only
Naxe	0.403332	0.620867	0.487628	0.44448	0.43358	0.441755	0.599296	0.606417	0.464082	0.431265	0.390267	0.418138	0.43068	0.425757	0.44078	1.43289	0.652163	0.338633	0.474629	0.46366	0.400945	0.467589	0.387713	0.406454	0.485799	HSC_only
Nbea	0.168044	0.10213	0.148605	0.124944	0.172299	0.139716	0.122971	0.275758	0.121447	0.140849	0.196359	0.21585	0.146957	0.191231	0.141365	0	0.0555854	0.220872	0.130558	0.149881	0.245006	0	0.122493	0.143457	0.181101	HSC_only
Nbn	0.115475	0.232343	0.0407954	0.135112	0.0844214	0.0991328	0.18673	0.183248	0.146805	0.0968969	0.0875935	0.0826926	0.0952826	0.060662	0.101667	0	0.181453	0.0739118	0.136426	0.0949513	0.0907769	0.342792	0.114528	0.140219	0.114856	HSC_only
Ncam2	0.0724959	0.0394925	0.0603096	0.0587954	0.0582704	0.0451904	0.016761	0.0537746	0.0397553	0.0593072	0.0787357	0.0908275	0.0637376	0.0962317	0.0638167	0.953743	0.0196299	0.0256848	0.0442373	0.0609244	0.116027	0	0.0486465	0.0762854	0.0701428	HSC_only
Ncapd3	0.128499	0.552897	0.0459124	0.149024	0.10165	0.129306	0.524344	0.0938738	0.181117	0.132738	0.178706	0.105073	0.147069	0.0912631	0.127574	0	0.558292	0.113032	0.158472	0.119534	0.0841892	0.752259	0.106545	0.16323	0.204308	HSC_only
Ncl	2.26691	2.31753	2.16734	2.65175	2.01124	1.83999	2.13766	1.71984	2.20886	1.69898	1.82888	1.96687	2.24042	1.71442	1.79383	1.43289	2.10604	1.69364	2.19404	1.63347	1.87429	2.25701	1.88522	2.13226	1.7064	HSC_only
Ndfip1	0.0964589	0.125128	0.122218	0.0941224	0.125244	0.0970579	0.130066	0.156843	0.0967563	0.119014	0.14561	0.147774	0.139829	0.193673	0.102659	0	0.0821469	0.0900799	0.0909991	0.115356	0.0898302	0	0.0915877	0.109682	0.119378	HSC_only
Ndfip2	0.262491	0.274037	0.345733	0.225449	0.249652	0.265224	0.262326	0.226126	0.262576	0.251504	0.452508	0.389524	0.350247	0.332551	0.303366	0	0.379507	0.343486	0.277019	0.284208	0.300383	0	0.320482	0.315866	0.317326	HSC_only
Ndufa10	0.5896	0.761979	0.495118	0.648231	0.564822	0.535612	0.63238	0.5976	0.672733	0.533687	0.53085	0.591752	0.714094	0.35286	0.555946	0	0.801869	0.514472	0.632227	0.518652	0.565469	0.550793	0.542249	0.591697	0.496096	HSC_only
Ndufa11	0.665902	0.811887	0.93677	0.769998	0.65585	0.535026	0.805258	0.67895	0.681654	0.518361	0.538739	0.555155	0.630156	0.422595	0.537504	0.953743	0.673503	0.516192	0.661689	0.523297	0.536654	0.467589	0.457565	0.598613	0.508173	HSC_only
[truncated: 2,507 more rows]

## Sheet: GCSF_1.5
	GCSF_Activated	GCSF_Cell-cycle	GCSF_Interferon	GCSF_Metabolism	GCSF_Quiescent	ct_Activated	ct_Cell-cycle	ct_Interferon	ct_Metabolism	ct_Quiescent	dmPGE2_Activated	dmPGE2_Acute-Activation	dmPGE2_Metabolism	dmPGE2_Quiescent	indo_Activated	indo_Acute-Activation	indo_Cell-cycle	indo_Interferon	indo_Metabolism	indo_Quiescent	pIC_Activated	pIC_Cell-cycle	pIC_Interferon	pIC_Metabolism	pIC_Quiescent	specific
[truncated: 19 more rows]

[truncated: 8 more sheets: GCSF_1.2, GCSF_nocutoff, indo_1.5, indo_1.2, indo_nocutoff, pIC_1.5, pIC_1.2, pIC_nocutoff]
