# Supplementary material for: External signals regulate continuous transcriptional states in hematopoietic stem cells
Source: eLife. 2021 Dec 23;10:e66512. doi: 10.7554/eLife.66512 (PMC8700284; doi:10.7554/eLife.66512)
Supplement: Supplementary file 9. — Comparison of top 100 genes between LSK or HSC treatments and clusters (no duplicates) and comparison of top 100 genes between LSK and HSC clusters (with duplicates) and in HSC clusters Replicate 1 vs. Replicate 2. [file elife-66512-supp9.xlsx]

## Sheet: HSC_cluster_tx_overlap
Gene	HSC cluster	HSC treatment
Ran	Metabolism	GCSF
Eif5a	Metabolism
Mif	Metabolism
Ncl	Metabolism	GCSF
Ppia	Metabolism
Nme1	Metabolism	GCSF
Pfn1	Metabolism
Ptma	Metabolism
Anp32b	Metabolism	GCSF
Slc25a5	Metabolism	GCSF
Ranbp1	Metabolism	GCSF
Hsp90aa1	Metabolism	GCSF
Eif4a1	Metabolism	GCSF
Srm	Metabolism	GCSF
Set	Metabolism	GCSF
Atp5g1	Metabolism	GCSF
Hspd1	Metabolism	GCSF
Ybx3	Metabolism	GCSF
Hsp90ab1	Metabolism
Hspa8	Metabolism
Nop56	Metabolism	GCSF
C1qbp	Metabolism
Pa2g4	Metabolism	GCSF
Nop10	Metabolism
Npm1	Metabolism
Ybx1	Metabolism
Hspe1	Metabolism
Serbp1	Metabolism	GCSF
Hnrnpf	Metabolism	GCSF
Phgdh	Metabolism
Dctpp1	Metabolism
Cct3	Metabolism	GCSF
Ppp1r14b	Metabolism
Fbl	Metabolism
Cfl1	Metabolism
Srsf2	Metabolism	GCSF
Snrpd1	Metabolism
Actb	Metabolism
Cdca7	Metabolism
Cox5a	Metabolism
Tuba1b	Metabolism
Nhp2	Metabolism	GCSF
Nop58	Metabolism	GCSF
G3bp1	Metabolism	GCSF
Prdx1	Metabolism
Dkc1	Metabolism
Cdk4	Metabolism
Cct8	Metabolism
Banf1	Metabolism
Aprt	Metabolism
Ldha	Metabolism	GCSF
Bzw2	Metabolism
H2afz	Metabolism
Prmt1	Metabolism	GCSF
Ppa1	Metabolism
Apex1	Metabolism
Cnbp	Metabolism
Mcm6	Metabolism
Psma7	Metabolism
Mrpl12	Metabolism	GCSF
Atp5b	Metabolism
Mcm3	Metabolism
Snrpd3	Metabolism
Sumo2	Metabolism
Nolc1	Metabolism	GCSF
Snrpb	Metabolism
Rps27l	Metabolism
Rpsa	Metabolism
Tkt	Metabolism
Pebp1	Metabolism
Eef1g	Metabolism
Dut	Metabolism
Rbm3	Metabolism
Hnrnpab	Metabolism	GCSF
Pcbp1	Metabolism	GCSF
Fkbp4	Metabolism
Mat2a	Metabolism	GCSF
Dnph1	Metabolism
Gar1	Metabolism
Calr	Metabolism
Park7	Metabolism
Psmb5	Metabolism
Gapdh	Metabolism
Sec61b	Metabolism
Hnrnpu	Metabolism	GCSF
Snrpd2	Metabolism
Txn1	Metabolism
Rps8	Metabolism
Eif3a	Metabolism	GCSF
Gnl3	Metabolism	GCSF
Atp5e	Metabolism
U2af1	Metabolism	GCSF
Hdgf	Metabolism
Timm8a1	Metabolism
Nap1l1	Metabolism
Rsl1d1	Metabolism	GCSF
Tuba4a	Metabolism
Nsun2	Metabolism
Noc2l	Metabolism
Srsf3	Metabolism
Txnip	Quiescent	dmPGE2
Rps24	Quiescent
Rplp1	Quiescent
Fau	Quiescent
Mllt3	Quiescent
Rps14	Quiescent
Rpl9	Quiescent
Rps27	Quiescent
Rpl30	Quiescent
Pdzk1ip1	Quiescent
Ltb	Quiescent
Rsrp1	Quiescent
Pfdn5	Quiescent
Rps4x	Quiescent
Rps9	Quiescent
Hlf	Quiescent
mt-Co1	Quiescent
Rpl7	Quiescent
Rpl13	Quiescent
Rps10	Quiescent
Rpl26	Quiescent
Rpl27a	Quiescent
Itm2b	Quiescent
Gimap6	Quiescent
Cox7a2l	Quiescent
Mettl7a1	Quiescent
mt-Atp6	Quiescent
Rpl21	Quiescent
Ypel3	Quiescent
Gimap1	Quiescent
Smpdl3a	Quiescent
Clec2d	Quiescent
Procr	Quiescent
Rpl17	Quiescent
Gstm1	Quiescent
Rpl37a	Quiescent	indo
Rpl19	Quiescent
Rps21	Quiescent
Ifitm1	Quiescent	GCSF
Lmo2	Quiescent
Rps5	Quiescent
Tpt1	Quiescent
Pik3ip1	Quiescent	dmPGE2
Ogt	Quiescent
Rpl5	Quiescent
Malat1	Quiescent
Rpl18a	Quiescent
Rpl23	Quiescent
Crlf3	Quiescent
Rps3a1	Quiescent
Hacd4	Quiescent
Lst1	Quiescent
Rps23	Quiescent
Rps3	Quiescent
AC149090.1	Quiescent
Pik3r1	Quiescent
mt-Co3	Quiescent
H2-D1	Quiescent
Rpl11	Quiescent
Meg3	Quiescent
Rpl35a	Quiescent
Rabac1	Quiescent
Selenop	Quiescent
Gng11	Quiescent
mt-Co2	Quiescent
B2m	Quiescent
Tmem176b	Quiescent
Rps20	Quiescent
Rpl10	Quiescent
Rps12	Quiescent
H2-K1	Quiescent
Adgrg1	Quiescent
Gabarap	Quiescent
Tbxas1	Quiescent
Eif4a2	Quiescent
Cdkn1c	Quiescent
Limd2	Quiescent
Eif3f	Quiescent
Tmem59	Quiescent
Trim47	Quiescent
Rpl6	Quiescent
Pnisr	Quiescent
H2-T23	Quiescent
Prr13	Quiescent
Rbm5	Quiescent
Psap	Quiescent
Rpl34	Quiescent
Rps7	Quiescent
Glul	Quiescent
AI467606	Quiescent
Zfp950	Quiescent
Gm42418	Quiescent
Cd81	Quiescent
Tmem176a	Quiescent
Rpl12	Quiescent
Rpl24	Quiescent
Pold4	Quiescent
Rab38	Quiescent
Rps15	Quiescent
Tmem50a	Quiescent
Nr4a1	Activated
Hes1	Activated	indo
H3f3b	Activated
Ier2	Activated
Junb	Activated	pIC
Klf2	Activated	dmPGE2
Fos	Activated	pIC
Smad7	Activated
Nr4a2	Activated
Rgs2	Activated
Zfp36	Activated	pIC
Skil	Activated
Ier3	Activated
Pnrc1	Activated
Ubc	Activated
Mcl1	Activated
Ppp1r15a	Activated
Ccnt1	Activated
Dusp1	Activated
Isca1	Activated
Btg2	Activated
Ddx5	Activated
Egr1	Activated
Ccnl1	Activated
Klf9	Activated	dmPGE2
Klf4	Activated	indo
Cdk11b	Activated
Klf6	Activated	pIC
Srsf5	Activated	dmPGE2
Tsc22d2	Activated
Cebpb	Activated	dmPGE2
Rlim	Activated
Clk1	Activated
Tsc22d1	Activated	dmPGE2
Fam110a	Activated
Coq10b	Activated
Jund	Activated
Eif1	Activated	dmPGE2
Dnajb1	Activated
D8Ertd738e	Activated
Gm26532	Activated
Sik1	Activated	dmPGE2
Dennd4a	Activated	dmPGE2
Dusp2	Activated	dmPGE2
Wwc2	Activated
Jun	Activated	pIC
Sfr1	Activated
Rgs1	Activated
Rhob	Activated
Id1	Activated
Snrpc	Activated
Zcchc6	Activated
Elf1	Activated
Dnajb9	Activated
Stk17b	Activated	dmPGE2
Maff	Activated
Neat1	Activated
Cdkn1a	Activated	dmPGE2
Btg1	Activated	pIC
Klhl24	Activated
Tiparp	Activated
Neurl3	Activated	dmPGE2
Ranbp2	Activated
Rbm39	Activated
Dusp5	Activated
Avl9	Activated
Ctla2a	Activated	dmPGE2
Socs3	Activated	pIC
Klf13	Activated	dmPGE2
Ing2	Activated
Ddx50	Activated
Yrdc	Activated
Tra2b	Activated
Slc38a1	Activated	dmPGE2
Cenpa	Activated
Ier5	Activated	pIC
Nkx2-3	Activated
2810403A07Rik	Activated
Per1	Activated	dmPGE2
Tra2a	Activated
Fosb	Activated	indo
Myct1	Activated
Selenok	Activated
Rnf4	Activated
Luc7l2	Activated
Purb	Activated
Snu13	Activated
Frat2	Activated
Ncf2	Activated
Vamp3	Activated
Aff4	Activated
Ptp4a1	Activated
Hspa5	Activated	GCSF
Tgoln1	Activated
Zc3h12a	Activated
Serinc1	Activated
Jmjd1c	Activated
Etv3	Activated
Pcgf5	Activated
Tmem131l	Activated
Iigp1	Interferon	pIC
Isg15	Interferon	pIC
Ifit1	Interferon	pIC
Gbp7	Interferon	pIC
Oasl2	Interferon	pIC
Gm4951	Interferon	pIC
Ifitm3	Interferon
Rtp4	Interferon	pIC
Igtp	Interferon	pIC
Ifi203	Interferon	pIC
Serpina3g	Interferon	pIC
Ifi47	Interferon	pIC
Rsad2	Interferon	pIC
Irgm1	Interferon	pIC
Irf7	Interferon	pIC
Slfn5	Interferon	pIC
Ifi44	Interferon	pIC
Herc6	Interferon	pIC
Ifit3	Interferon	pIC
Parp14	Interferon	pIC
Xaf1	Interferon	pIC
Mndal	Interferon	pIC
Gbp5	Interferon	pIC
Ifit2	Interferon	pIC
Usp18	Interferon	pIC
Cmpk2	Interferon	pIC
Isg20	Interferon	pIC
Mx1	Interferon
Cxcl10	Interferon
Serpina3f	Interferon	pIC
Irf1	Interferon	pIC
Gbp2	Interferon	pIC
Trim30a	Interferon	pIC
Slfn8	Interferon	pIC
Eif2ak2	Interferon	pIC
Gbp3	Interferon
Tnfsf10	Interferon	pIC
Tor3a	Interferon	pIC
Gbp4	Interferon	pIC
Stat1	Interferon
Oasl1	Interferon	pIC
Apobec3	Interferon	pIC
Ddx58	Interferon	pIC
Parp9	Interferon	pIC
Pim1	Interferon	pIC
Casp4	Interferon	pIC
Cited2	Interferon	pIC
Samd9l	Interferon	pIC
Sp100	Interferon	pIC
Trim12a	Interferon	pIC
Zufsp	Interferon	pIC
Samhd1	Interferon	pIC
Tap1	Interferon
Slfn2	Interferon	pIC
Ehd4	Interferon	pIC
Ncoa7	Interferon	pIC
Ly6e	Interferon
Cd274	Interferon	pIC
9930111J21Rik2	Interferon	pIC
Ifih1	Interferon
Socs1	Interferon	pIC
Stat2	Interferon
Phf11b	Interferon
Bst2	Interferon
Zbp1	Interferon
F830016B08Rik	Interferon	pIC
Batf	Interferon	pIC
Znfx1	Interferon
Ube2l6	Interferon
Shisa5	Interferon
Irgm2	Interferon
Ifit3b	Interferon
Arid5a	Interferon	pIC
Dhx58	Interferon
Trafd1	Interferon
Mb21d1	Interferon	pIC
Csrnp1	Interferon	pIC
Daxx	Interferon	pIC
Cish	Interferon	pIC
Pnp	Interferon	pIC
Xbp1	Interferon	pIC
Socs2	Interferon	pIC
Ly6a	Interferon	pIC
Tgtp2	Interferon
Nfkbia	Interferon	pIC
Gadd45g	Interferon	pIC
Ifi35	Interferon
Slfn9	Interferon
Trim12c	Interferon
Rnf213	Interferon
Plscr1	Interferon	pIC
Dtx3l	Interferon
Il27	Interferon	pIC
Pml	Interferon	pIC
Sbno2	Interferon	pIC
Treml2	Interferon
Samsn1	Interferon	pIC
Oas3	Interferon
Etnk1	Interferon
Il2rg	Interferon	pIC
Hmgb2	Cell-cycle	dmPGE2
Stmn1	Cell-cycle
Hmgb1	Cell-cycle
Mki67	Cell-cycle
H2afv	Cell-cycle
Spc24	Cell-cycle
Top2a	Cell-cycle
Cks2	Cell-cycle
Birc5	Cell-cycle
Lmnb1	Cell-cycle
Smc2	Cell-cycle
Cdca8	Cell-cycle
Hmgn2	Cell-cycle
Smc4	Cell-cycle
Pbk	Cell-cycle
Dek	Cell-cycle
Tk1	Cell-cycle
Nucks1	Cell-cycle
Ube2s	Cell-cycle
Rrm1	Cell-cycle
Cdk1	Cell-cycle
Cenpm	Cell-cycle
Tmpo	Cell-cycle
Gmnn	Cell-cycle
Ezh2	Cell-cycle
H2afx	Cell-cycle
Tpx2	Cell-cycle
Cenpk	Cell-cycle
Pclaf	Cell-cycle
Lockd	Cell-cycle
Cdca3	Cell-cycle
H1fx	Cell-cycle
Ccdc34	Cell-cycle
Tyms	Cell-cycle
Cenpf	Cell-cycle
Rad51	Cell-cycle
Kif15	Cell-cycle
Ccnb2	Cell-cycle
Dnajc9	Cell-cycle
Nrm	Cell-cycle
Ccna2	Cell-cycle
Lig1	Cell-cycle
Atad2	Cell-cycle
Clspn	Cell-cycle
Cenph	Cell-cycle
Prc1	Cell-cycle
Nusap1	Cell-cycle
Uhrf1	Cell-cycle
Ckap2l	Cell-cycle
Knstrn	Cell-cycle
Hmgn1	Cell-cycle
Mad2l1	Cell-cycle
Neil3	Cell-cycle
Selenoh	Cell-cycle
Aurkb	Cell-cycle
Cenpw	Cell-cycle
Raly	Cell-cycle
Rfc4	Cell-cycle
Lsm2	Cell-cycle
Dnmt1	Cell-cycle
Rad51ap1	Cell-cycle
Cdc20	Cell-cycle
Ncapd2	Cell-cycle
Kif20b	Cell-cycle
Knl1	Cell-cycle
Racgap1	Cell-cycle
Mns1	Cell-cycle
Hirip3	Cell-cycle
Fignl1	Cell-cycle
Asf1b	Cell-cycle
Prim1	Cell-cycle
Cenpe	Cell-cycle
Kif11	Cell-cycle
Shcbp1	Cell-cycle
Nuf2	Cell-cycle
Kif22	Cell-cycle
Tacc3	Cell-cycle
Rrm2	Cell-cycle
Ywhah	Cell-cycle
Oaz1	Cell-cycle
Anp32e	Cell-cycle
Fen1	Cell-cycle
Rfc5	Cell-cycle
Usp1	Cell-cycle
Incenp	Cell-cycle
Cit	Cell-cycle
Esco2	Cell-cycle
Bub1b	Cell-cycle
Pmf1	Cell-cycle
Haus4	Cell-cycle
Ssrp1	Cell-cycle
Ncapg	Cell-cycle
Slbp	Cell-cycle
Hmgb3	Cell-cycle
Sgo1	Cell-cycle
Rangap1	Cell-cycle
Prdx4	Cell-cycle
Nt5dc2	Cell-cycle
Hist1h1b	Cell-cycle
Spc25	Cell-cycle
Fut8		GCSF
Nupr1		GCSF
Prtn3		GCSF
Eif2s2		GCSF
Eif4ebp1		GCSF
Manf		GCSF
Dnaja1		GCSF
Selenos		GCSF
Ddx21		GCSF
Myb		GCSF
Gspt1		GCSF
Herpud1		GCSF
Eif5b		GCSF
Serp1		GCSF
Pbx1		GCSF
Nars		GCSF
Eif3b		GCSF
Spi1		GCSF
Rrbp1		GCSF
Cacybp		GCSF
Ostc		GCSF
Cdv3		GCSF
Wdr43		GCSF
Spcs2		GCSF
Dynll1		GCSF
Sec61g		GCSF
Arpc1b		GCSF
Eprs		GCSF
Mydgf		GCSF
Fubp1		GCSF
Mgat2		GCSF
Adgrl4		GCSF
Ubxn4		GCSF
Mettl1		GCSF
Plcg2		GCSF
Tagln2		GCSF
Hdlbp		GCSF
Lman2		GCSF
Lrrc59		GCSF
Ftsj3		GCSF
Cct5		GCSF
Ptges3		GCSF
Gps1		GCSF
Puf60		GCSF
Eif4e		GCSF
Hspa9		GCSF
Srsf9		GCSF
Cltb		GCSF
Ssr2		GCSF
Slc39a7		GCSF
Tmed9		GCSF
Mthfd2		GCSF
Ifitm2		GCSF
Nktr		GCSF
Tmem167		GCSF
Abce1		GCSF
Nifk		GCSF
Sdcbp		GCSF
Psma3		GCSF
Timm10		GCSF
Txnl1		GCSF
Lsm12		GCSF
Tars		GCSF
Vcp		GCSF
Gm20186		pIC
Atf3		pIC
Tnip3		pIC
Ccrl2		pIC
Cd69		pIC
Tgm2		pIC
Peli1		pIC
Gadd45b		pIC
Top1		pIC
Bhlhe40		pIC
2810474O19Rik		pIC
Rps6ka3		pIC
Icam1		pIC
Zeb2		pIC
Clic4		pIC
Birc3		pIC
Ccl4		pIC
Susd6		pIC
Selp		pIC
Hk2		pIC
Uba52		indo
Rpl36		indo
Tsc22d3		dmPGE2
Plaur		dmPGE2
Ifngr1		dmPGE2
Fosl2		dmPGE2
Anks1		dmPGE2
Cytip		dmPGE2
Rnf125		dmPGE2
St8sia4		dmPGE2
Pde10a		dmPGE2
Cirbp		dmPGE2
Arpc3		dmPGE2
Fbxo9		dmPGE2
Mef2c		dmPGE2
mt-Nd3		dmPGE2
Dyrk3		dmPGE2
Pde4b		dmPGE2
Ddit4		dmPGE2
Upp1		dmPGE2
Zbtb20		dmPGE2
Egfl7		dmPGE2
Stxbp5		dmPGE2
Gpr65		dmPGE2
Hspa4		dmPGE2
Nek6		dmPGE2
Mindy1		dmPGE2
Pde4d		dmPGE2
Ucp2		dmPGE2
Tnfaip8		dmPGE2
Cdkn2d		dmPGE2
Ptp4a2		dmPGE2
Sult1a1		dmPGE2
Sla2		dmPGE2
Osbpl9		dmPGE2
Cdk17		dmPGE2
Man2a2		dmPGE2
Odc1		dmPGE2
Tinagl1		dmPGE2
Irf2bp2		dmPGE2
mt-Nd1		dmPGE2
Galc		dmPGE2
Ddx6		dmPGE2
Smim3		dmPGE2
Ube2e3		dmPGE2
Stat4		dmPGE2
Khdrbs1		dmPGE2
Vapa		dmPGE2
Gm11808		dmPGE2
Snrk		dmPGE2
P2rx4		dmPGE2
Fam107b		dmPGE2
Hnrnpdl		dmPGE2
Pdcd6		dmPGE2
Prdx6		dmPGE2
Pim3		dmPGE2
2010107E04Rik		dmPGE2
Ablim1		dmPGE2
Prkar1a		dmPGE2
Tmed5		dmPGE2
Myh9		dmPGE2
Rabgef1		dmPGE2
Dazap2		dmPGE2
Gpr132		dmPGE2
Txndc11		dmPGE2
B3gnt5		dmPGE2
Por		dmPGE2
Usmg5		dmPGE2
Epb41		dmPGE2
Map2k3		dmPGE2
Foxo3		dmPGE2
Emb		dmPGE2
Stx12		dmPGE2
Son		dmPGE2
Wnk1		dmPGE2
Abhd17b		dmPGE2
Ago2		dmPGE2
Foxo1		dmPGE2
Rpl36al		dmPGE2
Prkch		dmPGE2
Msi2		dmPGE2
Tm9sf3		dmPGE2
Tmsb10		dmPGE2

## Sheet: LSK_cluster_tx_overlap
Gene	LSK cluster	LSK treatment
Rps9	LSK_Primed
Rpl18a	LSK_Primed
Rpl10	LSK_Primed
Rpl32	LSK_Primed
Ogt	LSK_Primed
Rps18	LSK_Primed
Rpl17	LSK_Primed
Rps11	LSK_Primed
Rpl18	LSK_Primed
Sox4	LSK_Primed
Rsrp1	LSK_Primed
Rps10	LSK_Primed
Rps3	LSK_Primed
Cd37	LSK_Primed
Rps13	LSK_Primed
Rpl19	LSK_Primed
Naca	LSK_Primed
Arhgdib	LSK_Primed
Rps7	LSK_Primed
Rpl12	LSK_Primed
Rpl3	LSK_Primed
Ramp1	LSK_Primed
Rpl27a	LSK_Primed
Rplp0	LSK_Primed
Rps27a	LSK_Primed
Rack1	LSK_Primed
Aldoa	LSK_Primed
Cd34	LSK_Primed
Rpl11	LSK_Primed
Rpl22	LSK_Primed
Wfdc17	LSK_Primed
Rpl29	LSK_Primed
Il12a	LSK_Primed
Rpl24	LSK_Primed
Rpl10a	LSK_Primed
H2afy	LSK_Primed
Rps26	LSK_Primed
Serpinb1a	LSK_Primed
Gcnt2	LSK_Primed
Rps15a	LSK_Primed
Cd52	LSK_Primed
Plac8	LSK_Primed
Tespa1	LSK_Primed
Ptprcap	LSK_Primed
Rps2	LSK_Primed
Lyl1	LSK_Primed
Ptpre	LSK_Primed
Mtdh	LSK_Primed
Flt3	LSK_Primed
Rpl15	LSK_Primed
Myc	LSK_Primed	GCSF
Rpl34	LSK_Primed
Bmyc	LSK_Primed
Pou2f2	LSK_Primed
Cd27	LSK_Primed
Rps5	LSK_Primed
Rpl7	LSK_Primed
Rps16	LSK_Primed
Eif3f	LSK_Primed
Ighm	LSK_Primed	dmPGE2
Taldo1	LSK_Primed
Hoxa9	LSK_Primed
Eef1b2	LSK_Primed
AC149090.1	LSK_Primed
Lat2	LSK_Primed
Fam117a	LSK_Primed
Satb1	LSK_Primed
Rpsa	LSK_Primed
Rpl8	LSK_Primed
Rpl6	LSK_Primed
Mgat1	LSK_Primed
Il16	LSK_Primed
BC035044	LSK_Primed
Gm5111	LSK_Primed
Coro1a	LSK_Primed
Hhex	LSK_Primed
Fam212a	LSK_Primed
Tspan32	LSK_Primed
Sh2d5	LSK_Primed
Fxyd5	LSK_Primed
Cd53	LSK_Primed	dmPGE2
Adgrl4	LSK_Primed
Tcp11l2	LSK_Primed
Vldlr	LSK_Primed	GCSF
Kdm5b	LSK_Primed
Igfbp4	LSK_Primed
Sh3bgrl3	LSK_Primed
2001-09-01	LSK_Primed
Dntt	LSK_Primed
Laptm5	LSK_Primed
Luc7l3	LSK_Primed
Rps19	LSK_Primed
Lsp1	LSK_Primed
Rplp2	LSK_Primed
Gmfg	LSK_Primed
Rps6	LSK_Primed
Myb	LSK_Primed
Ptpn18	LSK_Primed
Actb	LSK_Primed
Zfand5	LSK_Primed
Dut	LSK_Metabolism
Lig1	LSK_Metabolism
Tyms	LSK_Metabolism
Ppia	LSK_Metabolism
Ran	LSK_Metabolism	GCSF
Ranbp1	LSK_Metabolism	GCSF
Dctpp1	LSK_Metabolism
Ybx1	LSK_Metabolism
Gmnn	LSK_Metabolism
Uhrf1	LSK_Metabolism
Mcm6	LSK_Metabolism
Mcm7	LSK_Metabolism
Ptma	LSK_Metabolism
Stmn1	LSK_Metabolism
Tipin	LSK_Metabolism
Hsp90aa1	LSK_Metabolism	GCSF
Mcm3	LSK_Metabolism
Mcm5	LSK_Metabolism
Slc25a5	LSK_Metabolism
Rpa2	LSK_Metabolism
Siva1	LSK_Metabolism
Dhfr	LSK_Metabolism
Nap1l1	LSK_Metabolism
Tk1	LSK_Metabolism
Nasp	LSK_Metabolism
Slbp	LSK_Metabolism
Tuba1b	LSK_Metabolism
Pclaf	LSK_Metabolism	dmPGE2
Pcna	LSK_Metabolism
Fen1	LSK_Metabolism
Rrm2	LSK_Metabolism
Tpi1	LSK_Metabolism
Rrm1	LSK_Metabolism
Syce2	LSK_Metabolism
Gapdh	LSK_Metabolism
Cox5a	LSK_Metabolism
Mif	LSK_Metabolism
Atad2	LSK_Metabolism
Dnajc9	LSK_Metabolism
Hint1	LSK_Metabolism
Alyref	LSK_Metabolism
Dnmt1	LSK_Metabolism
Mcm2	LSK_Metabolism
Rfc4	LSK_Metabolism
Dek	LSK_Metabolism
Rad51	LSK_Metabolism
Prim1	LSK_Metabolism
Hspd1	LSK_Metabolism	GCSF
Clspn	LSK_Metabolism
Nudc	LSK_Metabolism
Dtymk	LSK_Metabolism
Prdx1	LSK_Metabolism
Cdca7	LSK_Metabolism
Nt5dc2	LSK_Metabolism
Anp32b	LSK_Metabolism
Rfc2	LSK_Metabolism
Pa2g4	LSK_Metabolism	GCSF
Nme1	LSK_Metabolism	GCSF
Cenpm	LSK_Metabolism
Cdk4	LSK_Metabolism
Dtl	LSK_Metabolism	dmPGE2
Set	LSK_Metabolism	GCSF
Hat1	LSK_Metabolism
Tfdp1	LSK_Metabolism
Mrpl18	LSK_Metabolism
Gins2	LSK_Metabolism
Hells	LSK_Metabolism
Sumo2	LSK_Metabolism
Rfc5	LSK_Metabolism
Cdt1	LSK_Metabolism
Fabp5	LSK_Metabolism
Hmgn1	LSK_Metabolism
Ybx3	LSK_Metabolism	GCSF
Npm1	LSK_Metabolism
Orc6	LSK_Metabolism
Ssrp1	LSK_Metabolism
E2f1	LSK_Metabolism
Paics	LSK_Metabolism
Ppil1	LSK_Metabolism
Tuba4a	LSK_Metabolism
Mcm4	LSK_Metabolism
Rad51ap1	LSK_Metabolism
Hnrnpf	LSK_Metabolism
Sdf2l1	LSK_Metabolism
Snrpd1	LSK_Metabolism
Rbbp7	LSK_Metabolism
Lsm2	LSK_Metabolism
Ung	LSK_Metabolism
Rpa1	LSK_Metabolism
Pola1	LSK_Metabolism
Hnrnpab	LSK_Metabolism	GCSF
Ezh2	LSK_Metabolism
Pold2	LSK_Metabolism
Timm8a1	LSK_Metabolism	GCSF
Cbx5	LSK_Metabolism
Shmt1	LSK_Metabolism
Usp1	LSK_Metabolism
Cycs	LSK_Metabolism
Ldha	LSK_Metabolism	GCSF
Ncl	LSK_Metabolism	GCSF
Ftl1	LSK_Primitive
Ifitm1	LSK_Primitive	GCSF
Jund	LSK_Primitive
Hlf	LSK_Primitive
Malat1	LSK_Primitive
Rps14	LSK_Primitive
Rpl21	LSK_Primitive
Fos	LSK_Primitive	dmPGE2
Cd63	LSK_Primitive
Ier2	LSK_Primitive	dmPGE2
Apoe	LSK_Primitive
Pnrc1	LSK_Primitive
Dusp1	LSK_Primitive	dmPGE2
Ppp1r15a	LSK_Primitive
Adgrg1	LSK_Primitive
Pdzk1ip1	LSK_Primitive
Meis1	LSK_Primitive
Fau	LSK_Primitive
Mllt3	LSK_Primitive
Hacd4	LSK_Primitive
Rpl13	LSK_Primitive
Rpl23	LSK_Primitive
Rpl9	LSK_Primitive
Gng11	LSK_Primitive
Mpl	LSK_Primitive
Eif4a2	LSK_Primitive
Rbp1	LSK_Primitive
Procr	LSK_Primitive
Map1lc3b	LSK_Primitive
Rbm39	LSK_Primitive
Rpl5	LSK_Primitive
Clk1	LSK_Primitive	dmPGE2
Nr4a1	LSK_Primitive
Car2	LSK_Primitive
Vamp5	LSK_Primitive
Lmo2	LSK_Primitive
Mecom	LSK_Primitive
Angpt1	LSK_Primitive
Rpl26	LSK_Primitive
Cbfa2t3	LSK_Primitive
Egr1	LSK_Primitive
Neat1	LSK_Primitive	dmPGE2
Rhob	LSK_Primitive
Fosb	LSK_Primitive
Tbxas1	LSK_Primitive
Rab38	LSK_Primitive
Zfp36	LSK_Primitive	dmPGE2
Rplp1	LSK_Primitive
Tmem176b	LSK_Primitive
Smad7	LSK_Primitive
Krt18	LSK_Primitive
Pbx1	LSK_Primitive
Rpl30	LSK_Primitive
Cox7a2l	LSK_Primitive
Gimap1	LSK_Primitive
Gstm1	LSK_Primitive
Tpt1	LSK_Primitive
Ddx5	LSK_Primitive	pIC
Nkx2-3	LSK_Primitive
Myl6	LSK_Primitive
Pfdn5	LSK_Primitive
Gimap6	LSK_Primitive
Rgs2	LSK_Primitive
Klf2	LSK_Primitive	dmPGE2
Ldhb	LSK_Primitive
B2m	LSK_Primitive
Glul	LSK_Primitive
Gm19590	LSK_Primitive
Selenow	LSK_Primitive
H2-K1	LSK_Primitive
Vamp8	LSK_Primitive
Btg1	LSK_Primitive	dmPGE2
Gata2	LSK_Primitive
Zfp36l2	LSK_Primitive	dmPGE2
Ctsl	LSK_Primitive
Rabac1	LSK_Primitive
Gabarapl1	LSK_Primitive
Rps3a1	LSK_Primitive
Isca1	LSK_Primitive
Smpdl3a	LSK_Primitive
Dnajb9	LSK_Primitive
Pnisr	LSK_Primitive
Rps28	LSK_Primitive
Esam	LSK_Primitive
Itm2b	LSK_Primitive
Nr4a2	LSK_Primitive
Lst1	LSK_Primitive
Coq10b	LSK_Primitive
Klhl24	LSK_Primitive
Prr13	LSK_Primitive
Ddx50	LSK_Primitive
Hes1	LSK_Primitive
Cd9	LSK_Primitive
Capg	LSK_Primitive
Skil	LSK_Primitive
H2-T23	LSK_Primitive
Eif1	LSK_Primitive
Nfat5	LSK_Primitive
Avl9	LSK_Primitive
Tra2a	LSK_Primitive
Hmgb2	LSK_Cell-cycle	dmPGE2
Ube2c	LSK_Cell-cycle
Cdca8	LSK_Cell-cycle
Nusap1	LSK_Cell-cycle
Ccnb2	LSK_Cell-cycle
Cenpf	LSK_Cell-cycle
Cks2	LSK_Cell-cycle
Birc5	LSK_Cell-cycle
Mki67	LSK_Cell-cycle
Tubb4b	LSK_Cell-cycle
H2afv	LSK_Cell-cycle
Top2a	LSK_Cell-cycle
Cdca3	LSK_Cell-cycle
Cenpa	LSK_Cell-cycle
Tpx2	LSK_Cell-cycle
H2afx	LSK_Cell-cycle
Cdc20	LSK_Cell-cycle
Ccna2	LSK_Cell-cycle
Smc4	LSK_Cell-cycle
Ube2s	LSK_Cell-cycle
Hmmr	LSK_Cell-cycle
Prc1	LSK_Cell-cycle
Knl1	LSK_Cell-cycle
Kif11	LSK_Cell-cycle
Nucks1	LSK_Cell-cycle
Racgap1	LSK_Cell-cycle
Tubb5	LSK_Cell-cycle
Bub1b	LSK_Cell-cycle
Cks1b	LSK_Cell-cycle
Cdk1	LSK_Cell-cycle
Kif22	LSK_Cell-cycle
Arl6ip1	LSK_Cell-cycle
Mis18bp1	LSK_Cell-cycle
Knstrn	LSK_Cell-cycle
H2afz	LSK_Cell-cycle
Smc2	LSK_Cell-cycle
Hmgb1	LSK_Cell-cycle
Cenpe	LSK_Cell-cycle
Ckap2l	LSK_Cell-cycle
Incenp	LSK_Cell-cycle
Aurkb	LSK_Cell-cycle
Pimreg	LSK_Cell-cycle
Ccnb1	LSK_Cell-cycle
Kif15	LSK_Cell-cycle
Kif20b	LSK_Cell-cycle
Jpt1	LSK_Cell-cycle
Lockd	LSK_Cell-cycle
Kif23	LSK_Cell-cycle
Ckap5	LSK_Cell-cycle
Spc24	LSK_Cell-cycle
Calm2	LSK_Cell-cycle
Bub3	LSK_Cell-cycle
Tmpo	LSK_Cell-cycle
Ncapd2	LSK_Cell-cycle
Neil3	LSK_Cell-cycle
Lmnb1	LSK_Cell-cycle
Aspm	LSK_Cell-cycle
Tacc3	LSK_Cell-cycle
Ubb	LSK_Cell-cycle
Hmgn2	LSK_Cell-cycle
Nuf2	LSK_Cell-cycle
Pbk	LSK_Cell-cycle
Spc25	LSK_Cell-cycle
Plk1	LSK_Cell-cycle
Cdkn3	LSK_Cell-cycle
Hist1h1b	LSK_Cell-cycle
Hjurp	LSK_Cell-cycle
Tuba1c	LSK_Cell-cycle
Cit	LSK_Cell-cycle
Anp32e	LSK_Cell-cycle
Mad2l1	LSK_Cell-cycle
Shcbp1	LSK_Cell-cycle
Aurka	LSK_Cell-cycle
Rad21	LSK_Cell-cycle
Selenoh	LSK_Cell-cycle
Ccdc34	LSK_Cell-cycle
Ckap2	LSK_Cell-cycle
Kif20a	LSK_Cell-cycle
Kif4	LSK_Cell-cycle
Dlgap5	LSK_Cell-cycle
Bub1	LSK_Cell-cycle
Cdca2	LSK_Cell-cycle
Ect2	LSK_Cell-cycle
Dbf4	LSK_Cell-cycle
Hist1h2ap	LSK_Cell-cycle	dmPGE2
Psrc1	LSK_Cell-cycle
Nde1	LSK_Cell-cycle
Ndc80	LSK_Cell-cycle
Ncapg	LSK_Cell-cycle
Spag5	LSK_Cell-cycle
Cep55	LSK_Cell-cycle
Kif2c	LSK_Cell-cycle
Sgo2a	LSK_Cell-cycle
Rangap1	LSK_Cell-cycle
Cdc25b	LSK_Cell-cycle
Sgo1	LSK_Cell-cycle
Reep4	LSK_Cell-cycle
Cdca5	LSK_Cell-cycle
Arhgap11a	LSK_Cell-cycle
Sapcd2	LSK_Cell-cycle
Tmsb4x	LSK_Myeloid
Tyrobp	LSK_Myeloid
Ap3s1	LSK_Myeloid
Lgals1	LSK_Myeloid
Tspo	LSK_Myeloid
Fcer1g	LSK_Myeloid
Clec12a	LSK_Myeloid
Ctsg	LSK_Myeloid
Rab44	LSK_Myeloid
Gng12	LSK_Myeloid
Hsp90b1	LSK_Myeloid
Fcgr3	LSK_Myeloid
Cebpa	LSK_Myeloid
Alox5ap	LSK_Myeloid
Cst7	LSK_Myeloid
Hdc	LSK_Myeloid
Ssr4	LSK_Myeloid
Cst3	LSK_Myeloid
Msrb1	LSK_Myeloid
Atp8b4	LSK_Myeloid
Fcgr2b	LSK_Myeloid
Pdia6	LSK_Myeloid
Mcpt8	LSK_Myeloid
Pdia3	LSK_Myeloid
Gsr	LSK_Myeloid
Mpo	LSK_Myeloid
Cyba	LSK_Myeloid
Serf2	LSK_Myeloid
Anxa1	LSK_Myeloid
Npc2	LSK_Myeloid
Ctsz	LSK_Myeloid
Anxa2	LSK_Myeloid
Sec61g	LSK_Myeloid
Manf	LSK_Myeloid	GCSF
Actr3	LSK_Myeloid
Ms4a3	LSK_Myeloid
Ppib	LSK_Myeloid
Lgals3	LSK_Myeloid
Il3ra	LSK_Myeloid
Itgb7	LSK_Myeloid
Hvcn1	LSK_Myeloid
Atp6ap2	LSK_Myeloid
Reep5	LSK_Myeloid
Ostf1	LSK_Myeloid
Erp29	LSK_Myeloid
Ccl9	LSK_Myeloid
Cpa3	LSK_Myeloid
Emilin2	LSK_Myeloid
Fam46a	LSK_Myeloid
Fam129a	LSK_Myeloid
Slpi	LSK_Myeloid
Cotl1	LSK_Myeloid
Itgb2	LSK_Myeloid
Gpi1	LSK_Myeloid
1700020L24Rik	LSK_Myeloid
Tmed3	LSK_Myeloid
Nkg7	LSK_Myeloid
Sec11c	LSK_Myeloid
Csf2rb	LSK_Myeloid
Lmo4	LSK_Myeloid
Cdk2ap2	LSK_Myeloid
Anxa3	LSK_Myeloid
Pfkp	LSK_Myeloid
P4hb	LSK_Myeloid
S100a11	LSK_Myeloid
Arpc1b	LSK_Myeloid
Ms4a2	LSK_Myeloid
Igsf6	LSK_Myeloid
Serp1	LSK_Myeloid
Lman2	LSK_Myeloid
Atox1	LSK_Myeloid
Ankrd12	LSK_Myeloid
Sem1	LSK_Myeloid
Dbi	LSK_Myeloid
Csgalnact2	LSK_Myeloid
Fam49b	LSK_Myeloid
Myl12b	LSK_Myeloid
Lamtor2	LSK_Myeloid
Ddost	LSK_Myeloid
Myo1f	LSK_Myeloid
F630028O10Rik	LSK_Myeloid
Pdia4	LSK_Myeloid
Ltb4r1	LSK_Myeloid
Atp6v0b	LSK_Myeloid
Tmed2	LSK_Myeloid
Mapkapk3	LSK_Myeloid
Vim	LSK_Myeloid
Ostc	LSK_Myeloid
Atp5h	LSK_Myeloid
Nin	LSK_Myeloid
H2afj	LSK_Myeloid
Ssr2	LSK_Myeloid
Csrp3	LSK_Myeloid
Mrpl33	LSK_Myeloid
Cox6c	LSK_Myeloid
Itga2b	LSK_Myeloid
Atp6v0e	LSK_Myeloid
Alox5	LSK_Myeloid
Cyp4f18	LSK_Myeloid
Cnn2	LSK_Myeloid
Srm		GCSF
Gnl3		GCSF
Nop56		GCSF
Hspa5		GCSF
Nop58		GCSF
Nolc1		GCSF
Srsf7		GCSF
Dnaja1		GCSF
Eif2s2		GCSF
Hspa4		GCSF
Gspt1		GCSF
Mat2a		GCSF
Ppan		GCSF
Wdr43		GCSF
Rsl1d1		GCSF
Nhp2		GCSF
Dnaja2		GCSF
Eif4ebp1		GCSF
Timm9		GCSF
Rps6ka3		GCSF
Mrpl12		GCSF
Eif4g2		GCSF
Cacybp		GCSF
Mthfd2		GCSF
Mphosph10		GCSF
Eif1a		GCSF
Ppp1r14b		GCSF
Mrto4		GCSF
C1qbp		GCSF
Gtpbp4		GCSF
Srsf2		GCSF
Tomm40		GCSF
Dnajc2		GCSF
Nr2f6		GCSF
Mettl1		GCSF
Timm10		GCSF
Dkc1		GCSF
Cdv3		GCSF
Nars		GCSF
Lyar		GCSF
Eif5b		GCSF
Apex1		GCSF
Abce1		GCSF
Eif3b		GCSF
Aen		GCSF
Fut8		GCSF
Mrpl20		GCSF
Hnrnpd		GCSF
Eif4a1		GCSF
Ddx21		GCSF
Gar1		GCSF
Chchd4		GCSF
Strap		GCSF
Tars		GCSF
Tomm5		GCSF
Snu13		GCSF
Txnrd1		GCSF
Srsf9		GCSF
Eif5a		GCSF
Eif3a		GCSF
Mybbp1a		GCSF
Prmt1		GCSF
Ndufaf4		GCSF
Rrp1b		GCSF
Cnbp		GCSF
Lsm12		GCSF
Ifitm2		GCSF
Srpk1		GCSF
Syncrip		GCSF
Ppid		GCSF
Pcbp1		GCSF
Ptges3		GCSF
Fubp1		GCSF
Exosc1		GCSF
Prtn3		GCSF
Xbp1		GCSF
Gpatch4		GCSF
Rrbp1		GCSF
Psmd12		GCSF
Agpat5		GCSF
Ftsj3		GCSF
Ccdc86		GCSF
Rrs1		GCSF
Ppa1		GCSF
Cxcl10		pIC
Serpina3g		pIC
Rsad2		pIC
Ifit1		pIC
Iigp1		pIC
Pim1		pIC
Isg15		pIC
Cited2		pIC
Cd69		pIC
Rtp4		pIC
Irgm1		pIC
Usp18		pIC
Irf1		pIC
Oasl2		pIC
Parp14		pIC
Ifi203		pIC
Igtp		pIC
Ccl4		pIC
Ifit3		pIC
Gbp7		pIC
Cmpk2		pIC
Gbp5		pIC
Serpina3f		pIC
Ifi47		pIC
Socs1		pIC
Junb		pIC
Herc6		pIC
Mx1		pIC
Ifi44		pIC
Ifit2		pIC
Gm4951		pIC
Slfn8		pIC
Slfn5		pIC
Irf7		pIC
Trim30a		pIC
Nfkbia		pIC
Socs3		pIC
Ifitm3		pIC
Ncoa7		pIC
Tor3a		pIC
Isg20		pIC
Oasl1		pIC
Eif2ak2		pIC
Mndal		pIC
Xaf1		pIC
Stat1		pIC
Trim12a		pIC
Tnfsf10		pIC
9930111J21Rik2		pIC
Ddx58		pIC
Cish		pIC
Batf		pIC
Casp4		pIC
Ly6a		pIC
Parp9		pIC
Zufsp		pIC
Mb21d1		pIC
Arid5a		pIC
Ccnd2		pIC
Samd9l		pIC
Ly6e		pIC
Trim12c		pIC
Ehd4		pIC
Jun		pIC
Pnp		pIC
Cd274		pIC
Gbp2		pIC
Apobec3		pIC
Clec2d		pIC
Etnk1		pIC
Trafd1		pIC
Sp100		pIC
Samsn1		pIC
Slfn2		pIC
Dtx3l		pIC
Treml2		pIC
Icam1		pIC
Ifit3b		pIC
Sbno2		pIC
Bcl3		pIC
Samhd1		pIC
Irgm2		pIC
Ifi204		pIC
Stat2		pIC
Daxx		pIC
Ifih1		pIC
Bcl11a		pIC
Ifi206		pIC
Bst2		pIC
Gbp3		pIC
Csrnp1		pIC
Gadd45g		pIC
Ms4a6c		pIC
Ifi35		pIC
Zbp1		pIC
Zc3hav1		pIC
Gadd45b		pIC
Rnf213		pIC
Ifit1bl1		pIC
Trim13		indo
Cebpb		dmPGE2
Tsc22d3		dmPGE2
Ifngr1		dmPGE2
Pde4b		dmPGE2
Plaur		dmPGE2
Ctla2a		dmPGE2
Cdkn1a		dmPGE2
Gm10076		dmPGE2
Neurl3		dmPGE2
Rgs1		dmPGE2
Stk17b		dmPGE2
Cytip		dmPGE2
Bcl2l11		dmPGE2
Tsc22d1		dmPGE2
Selplg		dmPGE2
Fosl2		dmPGE2
Cirbp		dmPGE2
Ninj1		dmPGE2
Uba52		dmPGE2
Per1		dmPGE2
Dennd4a		dmPGE2
Erh		dmPGE2
mt-Nd3		dmPGE2
Odc1		dmPGE2
Rnf125		dmPGE2
Pik3ip1		dmPGE2
Anks1		dmPGE2
B3gnt5		dmPGE2
Klf6		dmPGE2
Pde10a		dmPGE2
Abhd17b		dmPGE2
Akap13		dmPGE2
Smim3		dmPGE2
Rpl35		dmPGE2
mt-Nd1		dmPGE2
Sell		dmPGE2
Srsf5		dmPGE2
Cables1		dmPGE2
Mcl1		dmPGE2
Fbxo9		dmPGE2
Txnip		dmPGE2
1700017B05Rik		dmPGE2
Klf13		dmPGE2
Gpr65		dmPGE2
Map2k3		dmPGE2
Rasa2		dmPGE2
Tgfb1		dmPGE2
Runx3		dmPGE2
Sult1a1		dmPGE2
H3f3b		dmPGE2
Nek6		dmPGE2
Emb		dmPGE2
Hnrnpdl		dmPGE2
Klf9		dmPGE2
Tmed5		dmPGE2
Lgals9		dmPGE2
Ucp2		dmPGE2
Runx2		dmPGE2
Ddit4		dmPGE2
Galc		dmPGE2
Nceh1		dmPGE2
Arpc3		dmPGE2
Myct1		dmPGE2
Pde4d		dmPGE2
Slc3a2		dmPGE2
Gpr132		dmPGE2
Rps27		dmPGE2
Sik1		dmPGE2
Inpp5d		dmPGE2
Myh9		dmPGE2
Jdp2		dmPGE2
Txndc11		dmPGE2
Rps21		dmPGE2
Cdk17		dmPGE2
Mef2c		dmPGE2
Fam107b		dmPGE2
Meg3		dmPGE2
St7		dmPGE2
Stat4		dmPGE2
Tnrc18		dmPGE2
Sla2		dmPGE2
Slc38a1		dmPGE2
Malt1		dmPGE2
Dusp5		dmPGE2
Ier3		dmPGE2

## Sheet: HSC_Repl1_2_overlap
gene	Quiescent_Replicate1	Activated_Replicate1	Metabolism_Replicate1	Interferon_Replicate1	Quiescent_Replicate2	Activated_Replicate2	Metabolism_Replicate2	Interferon_Replicate2
Ifitm1	TRUE	FALSE	FALSE	FALSE	TRUE	FALSE	FALSE	FALSE
Txnip	TRUE	FALSE	FALSE	FALSE	TRUE	FALSE	FALSE	FALSE
Ltb	TRUE	FALSE	FALSE	FALSE	FALSE	FALSE	FALSE	FALSE
B2m	TRUE	FALSE	FALSE	FALSE	FALSE	FALSE	FALSE	TRUE
Rsrp1	TRUE	FALSE	FALSE	FALSE	TRUE	FALSE	FALSE	FALSE
Mettl7a1	TRUE	FALSE	FALSE	FALSE	FALSE	FALSE	FALSE	FALSE
Gimap6	TRUE	FALSE	FALSE	FALSE	FALSE	FALSE	FALSE	FALSE
Ly6a	TRUE	FALSE	FALSE	TRUE	FALSE	FALSE	FALSE	TRUE
Gimap1	TRUE	FALSE	FALSE	FALSE	TRUE	FALSE	FALSE	FALSE
Mllt3	TRUE	FALSE	FALSE	FALSE	FALSE	FALSE	FALSE	FALSE
mt-Co1	TRUE	FALSE	FALSE	FALSE	FALSE	FALSE	FALSE	FALSE
Procr	TRUE	FALSE	FALSE	FALSE	FALSE	FALSE	FALSE	FALSE
Cox7a2l	TRUE	FALSE	FALSE	FALSE	FALSE	FALSE	FALSE	FALSE
Meg3	TRUE	FALSE	FALSE	FALSE	FALSE	FALSE	FALSE	FALSE
Gstm1	TRUE	FALSE	FALSE	FALSE	FALSE	FALSE	FALSE	FALSE
Hacd4	TRUE	FALSE	FALSE	FALSE	TRUE	FALSE	FALSE	FALSE
Pdzk1ip1	TRUE	FALSE	FALSE	FALSE	TRUE	FALSE	FALSE	FALSE
H2-K1	TRUE	FALSE	FALSE	FALSE	FALSE	FALSE	FALSE	FALSE
Malat1	TRUE	TRUE	FALSE	FALSE	FALSE	FALSE	FALSE	FALSE
H2-D1	TRUE	FALSE	FALSE	FALSE	FALSE	FALSE	FALSE	FALSE
Itm2b	TRUE	FALSE	FALSE	FALSE	FALSE	FALSE	FALSE	FALSE
Ifitm3	TRUE	FALSE	FALSE	TRUE	FALSE	FALSE	FALSE	TRUE
Tmem176b	TRUE	FALSE	FALSE	FALSE	FALSE	FALSE	FALSE	FALSE
Cd74	TRUE	FALSE	FALSE	FALSE	FALSE	FALSE	FALSE	FALSE
mt-Cytb	TRUE	FALSE	FALSE	FALSE	FALSE	FALSE	FALSE	FALSE
Hlf	TRUE	FALSE	FALSE	FALSE	FALSE	FALSE	FALSE	FALSE
mt-Co3	TRUE	FALSE	FALSE	FALSE	FALSE	FALSE	FALSE	FALSE
Shisa5	TRUE	FALSE	FALSE	TRUE	FALSE	FALSE	FALSE	TRUE
mt-Atp6	TRUE	FALSE	FALSE	FALSE	FALSE	FALSE	FALSE	FALSE
Rps14	TRUE	FALSE	FALSE	FALSE	TRUE	FALSE	FALSE	FALSE
Crlf3	TRUE	FALSE	FALSE	FALSE	TRUE	FALSE	FALSE	FALSE
Pim1	TRUE	FALSE	FALSE	FALSE	FALSE	FALSE	FALSE	FALSE
Gimap5	TRUE	FALSE	FALSE	FALSE	FALSE	FALSE	FALSE	FALSE
Rps9	TRUE	FALSE	FALSE	FALSE	TRUE	FALSE	FALSE	FALSE
Rps4x	TRUE	FALSE	FALSE	FALSE	TRUE	FALSE	FALSE	FALSE
Ogt	TRUE	FALSE	FALSE	FALSE	TRUE	FALSE	FALSE	FALSE
Zfp950	TRUE	FALSE	FALSE	FALSE	TRUE	FALSE	FALSE	FALSE
PISD	TRUE	FALSE	FALSE	FALSE	FALSE	FALSE	FALSE	FALSE
Smtnl1	TRUE	FALSE	FALSE	FALSE	FALSE	FALSE	FALSE	FALSE
Pfdn5	TRUE	FALSE	FALSE	FALSE	FALSE	FALSE	FALSE	FALSE
AI480526	TRUE	FALSE	FALSE	FALSE	TRUE	FALSE	FALSE	FALSE
Tmem176a	TRUE	FALSE	FALSE	FALSE	FALSE	FALSE	FALSE	FALSE
mt-Co2	TRUE	FALSE	FALSE	FALSE	FALSE	FALSE	FALSE	FALSE
Socs2	TRUE	FALSE	FALSE	FALSE	FALSE	FALSE	FALSE	FALSE
Eef1a1	TRUE	FALSE	FALSE	FALSE	FALSE	FALSE	FALSE	FALSE
Sult1a1	TRUE	FALSE	FALSE	FALSE	FALSE	FALSE	FALSE	FALSE
Lmo2	TRUE	FALSE	FALSE	FALSE	FALSE	FALSE	FALSE	FALSE
Rps24	TRUE	FALSE	FALSE	FALSE	TRUE	FALSE	FALSE	FALSE
Iigp1	TRUE	FALSE	FALSE	TRUE	FALSE	FALSE	FALSE	TRUE
Rplp1	TRUE	FALSE	FALSE	FALSE	TRUE	FALSE	FALSE	FALSE
Agpat4	TRUE	FALSE	FALSE	FALSE	FALSE	FALSE	FALSE	FALSE
Mycn	TRUE	FALSE	FALSE	FALSE	TRUE	FALSE	FALSE	FALSE
Taz	TRUE	FALSE	FALSE	FALSE	FALSE	FALSE	FALSE	FALSE
Clec2d	TRUE	FALSE	FALSE	FALSE	TRUE	FALSE	FALSE	FALSE
Trib3	TRUE	FALSE	FALSE	FALSE	FALSE	FALSE	FALSE	FALSE
Hmha1	TRUE	FALSE	FALSE	FALSE	FALSE	FALSE	FALSE	FALSE
Tbxas1	TRUE	FALSE	FALSE	FALSE	FALSE	FALSE	FALSE	FALSE
Gm4951	TRUE	FALSE	FALSE	TRUE	FALSE	FALSE	FALSE	TRUE
Ppfibp2	TRUE	FALSE	FALSE	FALSE	FALSE	FALSE	FALSE	FALSE
Hist1h2be	TRUE	FALSE	FALSE	FALSE	FALSE	FALSE	FALSE	FALSE
Ypel3	TRUE	FALSE	FALSE	FALSE	FALSE	FALSE	FALSE	FALSE
Tnip3	TRUE	FALSE	FALSE	FALSE	TRUE	FALSE	FALSE	FALSE
Eif4a2	TRUE	FALSE	FALSE	FALSE	FALSE	FALSE	FALSE	FALSE
Lst1	TRUE	FALSE	FALSE	FALSE	FALSE	FALSE	FALSE	FALSE
Tinagl1	TRUE	FALSE	FALSE	FALSE	FALSE	FALSE	FALSE	FALSE
Mgst1	TRUE	FALSE	FALSE	FALSE	FALSE	FALSE	FALSE	FALSE
Rpl13a	TRUE	FALSE	FALSE	FALSE	FALSE	FALSE	FALSE	FALSE
Sepp1	TRUE	FALSE	FALSE	FALSE	FALSE	FALSE	FALSE	FALSE
Rpl13	TRUE	FALSE	FALSE	FALSE	TRUE	FALSE	FALSE	FALSE
Ecscr	TRUE	FALSE	FALSE	FALSE	FALSE	FALSE	FALSE	FALSE
Pik3r1	TRUE	FALSE	FALSE	FALSE	FALSE	FALSE	FALSE	FALSE
Efna1	TRUE	FALSE	FALSE	FALSE	FALSE	FALSE	FALSE	FALSE
Prtn3	TRUE	FALSE	FALSE	FALSE	FALSE	FALSE	FALSE	FALSE
Sema4b	TRUE	FALSE	FALSE	FALSE	TRUE	FALSE	FALSE	FALSE
Rbm5	TRUE	FALSE	FALSE	FALSE	TRUE	FALSE	FALSE	FALSE
Cd81	TRUE	FALSE	FALSE	FALSE	FALSE	FALSE	FALSE	FALSE
Cers4	TRUE	FALSE	FALSE	FALSE	FALSE	FALSE	FALSE	FALSE
H2-M3	TRUE	FALSE	FALSE	FALSE	FALSE	FALSE	FALSE	FALSE
Lpar6	TRUE	FALSE	FALSE	FALSE	TRUE	FALSE	FALSE	FALSE
Serpinb6a	TRUE	FALSE	FALSE	FALSE	FALSE	FALSE	FALSE	FALSE
Smpdl3a	TRUE	FALSE	FALSE	FALSE	FALSE	FALSE	FALSE	FALSE
Tnfrsf25	TRUE	FALSE	FALSE	FALSE	FALSE	FALSE	FALSE	FALSE
Gimap4	TRUE	FALSE	FALSE	FALSE	FALSE	FALSE	FALSE	FALSE
Eef2	TRUE	FALSE	FALSE	FALSE	FALSE	FALSE	FALSE	FALSE
Parp14	TRUE	FALSE	FALSE	TRUE	TRUE	FALSE	FALSE	TRUE
Clec1a	TRUE	FALSE	FALSE	FALSE	FALSE	FALSE	FALSE	FALSE
Madd	TRUE	FALSE	FALSE	FALSE	TRUE	FALSE	FALSE	FALSE
Apobec3	TRUE	FALSE	FALSE	FALSE	FALSE	FALSE	FALSE	TRUE
Rps3a1	TRUE	FALSE	FALSE	FALSE	TRUE	FALSE	FALSE	FALSE
Rpl7	TRUE	FALSE	FALSE	FALSE	TRUE	FALSE	FALSE	FALSE
Cbx6	TRUE	FALSE	FALSE	FALSE	TRUE	FALSE	FALSE	FALSE
Gng11	TRUE	FALSE	FALSE	FALSE	FALSE	FALSE	FALSE	FALSE
Arl6ip5	TRUE	FALSE	FALSE	FALSE	FALSE	FALSE	FALSE	FALSE
Gabarapl1	TRUE	FALSE	FALSE	FALSE	FALSE	FALSE	FALSE	FALSE
Mttp	TRUE	FALSE	FALSE	FALSE	FALSE	FALSE	FALSE	FALSE
Rabac1	TRUE	FALSE	FALSE	FALSE	FALSE	FALSE	FALSE	FALSE
Rpl19	TRUE	FALSE	FALSE	FALSE	TRUE	FALSE	FALSE	FALSE
Ifi47	TRUE	FALSE	FALSE	TRUE	FALSE	FALSE	FALSE	TRUE
Tmem63b	TRUE	FALSE	FALSE	FALSE	FALSE	FALSE	FALSE	FALSE
AW112010	TRUE	FALSE	FALSE	TRUE	FALSE	FALSE	FALSE	TRUE
Fos	FALSE	TRUE	FALSE	TRUE	FALSE	TRUE	FALSE	FALSE
Nr4a1	FALSE	TRUE	FALSE	FALSE	FALSE	TRUE	FALSE	FALSE
Dusp1	FALSE	TRUE	FALSE	FALSE	FALSE	TRUE	FALSE	FALSE
Zfp36	FALSE	TRUE	FALSE	FALSE	FALSE	TRUE	FALSE	FALSE
H3f3b	FALSE	TRUE	FALSE	FALSE	FALSE	TRUE	FALSE	FALSE
Junb	FALSE	TRUE	FALSE	FALSE	FALSE	TRUE	FALSE	FALSE
Klf6	FALSE	TRUE	FALSE	FALSE	FALSE	TRUE	FALSE	FALSE
Ier2	FALSE	TRUE	FALSE	FALSE	FALSE	TRUE	FALSE	FALSE
Fosb	FALSE	TRUE	FALSE	FALSE	FALSE	FALSE	FALSE	FALSE
Rgs2	FALSE	TRUE	FALSE	FALSE	FALSE	TRUE	FALSE	FALSE
Nr4a2	FALSE	TRUE	FALSE	FALSE	FALSE	TRUE	FALSE	FALSE
Ppp1r15a	FALSE	TRUE	FALSE	FALSE	FALSE	TRUE	FALSE	FALSE
Jun	FALSE	TRUE	FALSE	FALSE	FALSE	TRUE	FALSE	FALSE
Sik1	FALSE	TRUE	FALSE	FALSE	FALSE	TRUE	FALSE	FALSE
Egr1	FALSE	TRUE	FALSE	FALSE	FALSE	TRUE	FALSE	FALSE
Cdk11b	FALSE	TRUE	FALSE	FALSE	FALSE	TRUE	FALSE	FALSE
Neat1	FALSE	TRUE	FALSE	TRUE	FALSE	FALSE	FALSE	FALSE
Snrpc	FALSE	TRUE	FALSE	FALSE	FALSE	TRUE	FALSE	FALSE
Btg2	FALSE	TRUE	FALSE	FALSE	FALSE	TRUE	FALSE	FALSE
Coq10b	FALSE	TRUE	FALSE	FALSE	FALSE	TRUE	FALSE	FALSE
Ubc	FALSE	TRUE	FALSE	FALSE	FALSE	TRUE	FALSE	FALSE
Hes1	FALSE	TRUE	FALSE	FALSE	FALSE	TRUE	FALSE	FALSE
Klf4	FALSE	TRUE	FALSE	FALSE	FALSE	TRUE	FALSE	FALSE
Srsf5	FALSE	TRUE	FALSE	FALSE	FALSE	TRUE	FALSE	FALSE
Skil	FALSE	TRUE	FALSE	TRUE	FALSE	TRUE	FALSE	FALSE
Id1	FALSE	TRUE	FALSE	FALSE	FALSE	TRUE	FALSE	FALSE
Rlim	FALSE	TRUE	FALSE	FALSE	FALSE	TRUE	FALSE	FALSE
Clk1	FALSE	TRUE	FALSE	FALSE	FALSE	TRUE	FALSE	FALSE
Rgs1	FALSE	TRUE	FALSE	FALSE	FALSE	TRUE	FALSE	FALSE
Ddx5	FALSE	TRUE	FALSE	FALSE	FALSE	TRUE	FALSE	FALSE
Eif1	FALSE	TRUE	FALSE	FALSE	FALSE	TRUE	FALSE	FALSE
Nfkbiz	FALSE	TRUE	FALSE	FALSE	FALSE	FALSE	FALSE	FALSE
Ccnl1	FALSE	TRUE	FALSE	FALSE	FALSE	TRUE	FALSE	FALSE
Ier3	FALSE	TRUE	FALSE	FALSE	FALSE	TRUE	FALSE	FALSE
Socs3	FALSE	TRUE	FALSE	FALSE	FALSE	TRUE	FALSE	FALSE
Slc3a2	FALSE	TRUE	FALSE	FALSE	FALSE	FALSE	FALSE	FALSE
Tsc22d2	FALSE	TRUE	FALSE	FALSE	FALSE	TRUE	FALSE	FALSE
Avl9	FALSE	TRUE	FALSE	FALSE	FALSE	TRUE	FALSE	FALSE
Gm26532	FALSE	TRUE	FALSE	FALSE	FALSE	TRUE	FALSE	FALSE
Klf9	FALSE	TRUE	FALSE	FALSE	FALSE	TRUE	FALSE	FALSE
Klf2	FALSE	TRUE	FALSE	FALSE	FALSE	TRUE	FALSE	FALSE
Elf1	FALSE	TRUE	FALSE	FALSE	FALSE	TRUE	FALSE	FALSE
Dnajb1	FALSE	TRUE	FALSE	FALSE	FALSE	TRUE	FALSE	FALSE
Pde10a	FALSE	TRUE	FALSE	FALSE	FALSE	TRUE	FALSE	FALSE
Atf3	FALSE	TRUE	FALSE	FALSE	FALSE	TRUE	FALSE	FALSE
Fam110a	FALSE	TRUE	FALSE	FALSE	FALSE	TRUE	FALSE	FALSE
Mcl1	FALSE	TRUE	FALSE	FALSE	FALSE	TRUE	FALSE	FALSE
Cdkn1a	FALSE	TRUE	FALSE	FALSE	FALSE	TRUE	FALSE	FALSE
Rbm39	FALSE	TRUE	FALSE	FALSE	FALSE	FALSE	FALSE	FALSE
2810403A07Rik	FALSE	TRUE	FALSE	FALSE	FALSE	TRUE	FALSE	FALSE
S1pr1	FALSE	TRUE	FALSE	FALSE	FALSE	TRUE	FALSE	FALSE
Prdx6	FALSE	TRUE	FALSE	FALSE	FALSE	FALSE	FALSE	FALSE
Ccnt1	FALSE	TRUE	FALSE	FALSE	FALSE	TRUE	FALSE	FALSE
Tra2b	FALSE	TRUE	FALSE	FALSE	FALSE	TRUE	FALSE	FALSE
Nap1l3	FALSE	TRUE	FALSE	FALSE	FALSE	FALSE	FALSE	FALSE
Spty2d1	FALSE	TRUE	FALSE	FALSE	FALSE	FALSE	FALSE	FALSE
Nfkbid	FALSE	TRUE	FALSE	FALSE	FALSE	TRUE	FALSE	FALSE
Ddx3x	FALSE	TRUE	FALSE	FALSE	FALSE	FALSE	FALSE	FALSE
Tiparp	FALSE	TRUE	FALSE	FALSE	FALSE	TRUE	FALSE	FALSE
D8Ertd738e	FALSE	TRUE	FALSE	FALSE	FALSE	TRUE	FALSE	FALSE
Arhgap31	FALSE	TRUE	FALSE	FALSE	FALSE	FALSE	FALSE	FALSE
Tsc22d1	FALSE	TRUE	FALSE	FALSE	FALSE	TRUE	FALSE	FALSE
Rhob	FALSE	TRUE	FALSE	FALSE	FALSE	TRUE	FALSE	FALSE
Tra2a	FALSE	TRUE	FALSE	FALSE	FALSE	FALSE	FALSE	FALSE
Dnajb9	FALSE	TRUE	FALSE	FALSE	FALSE	TRUE	FALSE	FALSE
egfp	FALSE	TRUE	FALSE	FALSE	FALSE	FALSE	FALSE	FALSE
Ctla2a	FALSE	TRUE	FALSE	FALSE	FALSE	TRUE	FALSE	FALSE
Spry1	FALSE	TRUE	FALSE	FALSE	FALSE	TRUE	FALSE	FALSE
Hist1h1c	FALSE	TRUE	FALSE	FALSE	FALSE	FALSE	FALSE	FALSE
Jmjd1c	FALSE	TRUE	FALSE	FALSE	FALSE	FALSE	FALSE	FALSE
Smad7	FALSE	TRUE	FALSE	FALSE	FALSE	TRUE	FALSE	FALSE
Isca1	FALSE	TRUE	FALSE	FALSE	FALSE	TRUE	FALSE	FALSE
Taf7	FALSE	TRUE	FALSE	FALSE	FALSE	FALSE	FALSE	FALSE
Hist1h2bc	FALSE	TRUE	FALSE	FALSE	FALSE	TRUE	FALSE	FALSE
Ubb	FALSE	TRUE	FALSE	FALSE	FALSE	FALSE	FALSE	FALSE
Pnrc1	FALSE	TRUE	FALSE	FALSE	FALSE	TRUE	FALSE	FALSE
Cenpa	FALSE	TRUE	FALSE	FALSE	FALSE	TRUE	FALSE	FALSE
Zc3h12a	FALSE	TRUE	FALSE	FALSE	FALSE	TRUE	FALSE	FALSE
Spag6l	FALSE	TRUE	FALSE	FALSE	FALSE	FALSE	FALSE	FALSE
Gem	FALSE	TRUE	FALSE	FALSE	FALSE	FALSE	FALSE	FALSE
Adgre5	FALSE	TRUE	FALSE	FALSE	FALSE	FALSE	FALSE	FALSE
Bhlhe40	FALSE	TRUE	FALSE	FALSE	FALSE	TRUE	FALSE	FALSE
1200007C13Rik	FALSE	TRUE	FALSE	FALSE	FALSE	FALSE	FALSE	FALSE
Fbxw2	FALSE	TRUE	FALSE	FALSE	FALSE	FALSE	FALSE	FALSE
Stk17b	FALSE	TRUE	FALSE	FALSE	FALSE	TRUE	FALSE	FALSE
Vegfa	FALSE	TRUE	FALSE	FALSE	FALSE	TRUE	FALSE	FALSE
Trib1	FALSE	TRUE	FALSE	FALSE	FALSE	FALSE	FALSE	FALSE
Tssc4	FALSE	TRUE	FALSE	FALSE	FALSE	FALSE	FALSE	FALSE
Sfr1	FALSE	TRUE	FALSE	TRUE	FALSE	TRUE	FALSE	FALSE
Btg1	FALSE	TRUE	FALSE	FALSE	FALSE	TRUE	FALSE	FALSE
Hey1	FALSE	TRUE	FALSE	FALSE	FALSE	FALSE	FALSE	FALSE
Tnfaip2	FALSE	TRUE	FALSE	FALSE	FALSE	FALSE	FALSE	FALSE
Jund	FALSE	TRUE	FALSE	FALSE	FALSE	TRUE	FALSE	FALSE
Hspa5	FALSE	TRUE	FALSE	FALSE	FALSE	TRUE	FALSE	FALSE
Dpm1	FALSE	TRUE	FALSE	FALSE	FALSE	FALSE	FALSE	FALSE
Ftl1	FALSE	TRUE	FALSE	FALSE	FALSE	FALSE	FALSE	FALSE
Arpc3	FALSE	TRUE	FALSE	FALSE	FALSE	FALSE	FALSE	FALSE
Atf4	FALSE	TRUE	FALSE	FALSE	FALSE	FALSE	FALSE	FALSE
Rgcc	FALSE	TRUE	FALSE	FALSE	FALSE	FALSE	FALSE	FALSE
Ran	FALSE	FALSE	TRUE	FALSE	FALSE	FALSE	TRUE	FALSE
Ptma	FALSE	FALSE	TRUE	FALSE	FALSE	FALSE	TRUE	FALSE
Ranbp1	FALSE	FALSE	TRUE	FALSE	FALSE	FALSE	TRUE	FALSE
Actb	FALSE	FALSE	TRUE	FALSE	FALSE	FALSE	FALSE	FALSE
Cdca7	FALSE	FALSE	TRUE	FALSE	FALSE	FALSE	TRUE	FALSE
Ppia	FALSE	FALSE	TRUE	FALSE	FALSE	FALSE	TRUE	FALSE
H2afz	FALSE	FALSE	TRUE	FALSE	FALSE	FALSE	TRUE	FALSE
Mif	FALSE	FALSE	TRUE	FALSE	FALSE	FALSE	TRUE	FALSE
Nop56	FALSE	FALSE	TRUE	FALSE	FALSE	FALSE	TRUE	FALSE
Dctpp1	FALSE	FALSE	TRUE	FALSE	FALSE	FALSE	TRUE	FALSE
Eif5a	FALSE	FALSE	TRUE	FALSE	FALSE	FALSE	TRUE	FALSE
Nme1	FALSE	FALSE	TRUE	FALSE	FALSE	FALSE	TRUE	FALSE
Dut	FALSE	FALSE	TRUE	FALSE	FALSE	FALSE	TRUE	FALSE
Ung	FALSE	FALSE	TRUE	FALSE	FALSE	FALSE	TRUE	FALSE
Ncl	FALSE	FALSE	TRUE	FALSE	FALSE	FALSE	FALSE	FALSE
Nasp	FALSE	FALSE	TRUE	FALSE	FALSE	FALSE	TRUE	FALSE
Srsf7	FALSE	FALSE	TRUE	FALSE	FALSE	FALSE	FALSE	FALSE
Mcm3	FALSE	FALSE	TRUE	FALSE	FALSE	FALSE	TRUE	FALSE
Mcm2	FALSE	FALSE	TRUE	FALSE	FALSE	FALSE	TRUE	FALSE
Rbm3	FALSE	FALSE	TRUE	FALSE	FALSE	FALSE	TRUE	FALSE
Erh	FALSE	FALSE	TRUE	FALSE	FALSE	FALSE	FALSE	FALSE
Hsp90aa1	FALSE	FALSE	TRUE	FALSE	FALSE	FALSE	TRUE	FALSE
Hells	FALSE	FALSE	TRUE	FALSE	FALSE	FALSE	TRUE	FALSE
Set	FALSE	FALSE	TRUE	FALSE	FALSE	FALSE	TRUE	FALSE
Stmn1	FALSE	FALSE	TRUE	FALSE	FALSE	FALSE	TRUE	FALSE
Mcm6	FALSE	FALSE	TRUE	FALSE	FALSE	FALSE	TRUE	FALSE
Pfn1	FALSE	FALSE	TRUE	FALSE	FALSE	FALSE	TRUE	FALSE
Tipin	FALSE	FALSE	TRUE	FALSE	FALSE	FALSE	TRUE	FALSE
Snrpd1	FALSE	FALSE	TRUE	FALSE	FALSE	FALSE	TRUE	FALSE
Cox5a	FALSE	FALSE	TRUE	FALSE	FALSE	FALSE	TRUE	FALSE
Slc25a5	FALSE	FALSE	TRUE	FALSE	FALSE	FALSE	TRUE	FALSE
Dnmt1	FALSE	FALSE	TRUE	FALSE	FALSE	FALSE	TRUE	FALSE
Txn1	FALSE	FALSE	TRUE	FALSE	FALSE	FALSE	TRUE	FALSE
Lig1	FALSE	FALSE	TRUE	FALSE	FALSE	FALSE	TRUE	FALSE
Nap1l1	FALSE	FALSE	TRUE	FALSE	FALSE	FALSE	TRUE	FALSE
Nop10	FALSE	FALSE	TRUE	FALSE	FALSE	FALSE	FALSE	FALSE
Serbp1	FALSE	FALSE	TRUE	FALSE	FALSE	FALSE	FALSE	FALSE
Eif4a1	FALSE	FALSE	TRUE	FALSE	FALSE	FALSE	FALSE	FALSE
Rps27l	FALSE	FALSE	TRUE	FALSE	FALSE	FALSE	FALSE	FALSE
Mcm5	FALSE	FALSE	TRUE	FALSE	FALSE	FALSE	TRUE	FALSE
Hmgb3	FALSE	FALSE	TRUE	FALSE	FALSE	FALSE	FALSE	FALSE
Mcm7	FALSE	FALSE	TRUE	FALSE	FALSE	FALSE	TRUE	FALSE
Sdf2l1	FALSE	FALSE	TRUE	FALSE	FALSE	FALSE	FALSE	FALSE
Hspd1	FALSE	FALSE	TRUE	FALSE	FALSE	FALSE	TRUE	FALSE
Gmnn	FALSE	FALSE	TRUE	FALSE	FALSE	FALSE	TRUE	FALSE
Ddx39	FALSE	FALSE	TRUE	FALSE	FALSE	FALSE	FALSE	FALSE
Hnrnpf	FALSE	FALSE	TRUE	FALSE	FALSE	FALSE	TRUE	FALSE
Nop58	FALSE	FALSE	TRUE	FALSE	FALSE	FALSE	TRUE	FALSE
Atpif1	FALSE	FALSE	TRUE	FALSE	FALSE	FALSE	FALSE	FALSE
Atp5g1	FALSE	FALSE	TRUE	FALSE	FALSE	FALSE	TRUE	FALSE
Srsf3	FALSE	FALSE	TRUE	FALSE	FALSE	FALSE	FALSE	FALSE
Siva1	FALSE	FALSE	TRUE	FALSE	FALSE	FALSE	TRUE	FALSE
Dynll1	FALSE	FALSE	TRUE	FALSE	FALSE	FALSE	FALSE	FALSE
Ak2	FALSE	FALSE	TRUE	FALSE	FALSE	FALSE	FALSE	FALSE
Crip1	FALSE	FALSE	TRUE	FALSE	FALSE	FALSE	FALSE	FALSE
Rpl36al	FALSE	FALSE	TRUE	FALSE	FALSE	FALSE	FALSE	FALSE
C1qbp	FALSE	FALSE	TRUE	FALSE	FALSE	FALSE	FALSE	FALSE
Cfl1	FALSE	FALSE	TRUE	FALSE	FALSE	FALSE	FALSE	FALSE
Dtymk	FALSE	FALSE	TRUE	FALSE	FALSE	FALSE	TRUE	FALSE
Pa2g4	FALSE	FALSE	TRUE	FALSE	FALSE	FALSE	TRUE	FALSE
Ezh2	FALSE	FALSE	TRUE	FALSE	FALSE	FALSE	TRUE	FALSE
Dkc1	FALSE	FALSE	TRUE	FALSE	FALSE	FALSE	FALSE	FALSE
Syce2	FALSE	FALSE	TRUE	FALSE	FALSE	FALSE	TRUE	FALSE
Mcm4	FALSE	FALSE	TRUE	FALSE	FALSE	FALSE	TRUE	FALSE
Gins2	FALSE	FALSE	TRUE	FALSE	FALSE	FALSE	TRUE	FALSE
Cdk6	FALSE	FALSE	TRUE	FALSE	FALSE	FALSE	FALSE	FALSE
Banf1	FALSE	FALSE	TRUE	FALSE	FALSE	FALSE	TRUE	FALSE
Uqcc2	FALSE	FALSE	TRUE	FALSE	FALSE	FALSE	FALSE	FALSE
Slbp	FALSE	FALSE	TRUE	FALSE	FALSE	FALSE	TRUE	FALSE
Gnl3	FALSE	FALSE	TRUE	FALSE	FALSE	FALSE	FALSE	FALSE
Minos1	FALSE	FALSE	TRUE	FALSE	FALSE	FALSE	FALSE	FALSE
Dnph1	FALSE	FALSE	TRUE	FALSE	FALSE	FALSE	FALSE	FALSE
Cks2	FALSE	FALSE	TRUE	FALSE	FALSE	FALSE	FALSE	FALSE
Anp32b	FALSE	FALSE	TRUE	FALSE	FALSE	FALSE	TRUE	FALSE
Oaz1	FALSE	FALSE	TRUE	FALSE	FALSE	FALSE	FALSE	FALSE
2010107E04Rik	FALSE	FALSE	TRUE	FALSE	FALSE	FALSE	FALSE	FALSE
Nolc1	FALSE	FALSE	TRUE	FALSE	FALSE	FALSE	FALSE	FALSE
Hsp90ab1	FALSE	FALSE	TRUE	FALSE	FALSE	FALSE	FALSE	FALSE
Srsf2	FALSE	FALSE	TRUE	FALSE	FALSE	FALSE	FALSE	FALSE
Rpsa	FALSE	FALSE	TRUE	FALSE	FALSE	FALSE	FALSE	FALSE
Gar1	FALSE	FALSE	TRUE	FALSE	FALSE	FALSE	FALSE	FALSE
Uhrf1	FALSE	FALSE	TRUE	FALSE	FALSE	FALSE	TRUE	FALSE
Snrpf	FALSE	FALSE	TRUE	FALSE	FALSE	FALSE	FALSE	FALSE
Itga2b	FALSE	FALSE	TRUE	FALSE	FALSE	FALSE	FALSE	FALSE
Timeless	FALSE	FALSE	TRUE	FALSE	FALSE	FALSE	TRUE	FALSE
Eif3a	FALSE	FALSE	TRUE	FALSE	FALSE	FALSE	FALSE	FALSE
Fignl1	FALSE	FALSE	TRUE	FALSE	FALSE	FALSE	TRUE	FALSE
Hsp90b1	FALSE	FALSE	TRUE	FALSE	FALSE	FALSE	FALSE	FALSE
Fam111a	FALSE	FALSE	TRUE	FALSE	FALSE	FALSE	TRUE	FALSE
Prmt1	FALSE	FALSE	TRUE	FALSE	FALSE	FALSE	FALSE	FALSE
U2af1	FALSE	FALSE	TRUE	FALSE	FALSE	FALSE	FALSE	FALSE
Fbl	FALSE	FALSE	TRUE	FALSE	FALSE	FALSE	FALSE	FALSE
Srm	FALSE	FALSE	TRUE	FALSE	FALSE	FALSE	FALSE	FALSE
Prdx1	FALSE	FALSE	TRUE	FALSE	FALSE	FALSE	FALSE	FALSE
Slc22a3	FALSE	FALSE	TRUE	FALSE	FALSE	FALSE	FALSE	FALSE
Chchd2	FALSE	FALSE	TRUE	FALSE	FALSE	FALSE	FALSE	FALSE
Pgls	FALSE	FALSE	TRUE	FALSE	FALSE	FALSE	FALSE	FALSE
Hnrnpa1	FALSE	FALSE	TRUE	FALSE	FALSE	FALSE	FALSE	FALSE
Tkt	FALSE	FALSE	TRUE	FALSE	FALSE	FALSE	TRUE	FALSE
Nkg7	FALSE	FALSE	TRUE	FALSE	FALSE	FALSE	FALSE	FALSE
Ifi44	FALSE	FALSE	FALSE	TRUE	FALSE	FALSE	FALSE	TRUE
Ifit1	FALSE	FALSE	FALSE	TRUE	FALSE	FALSE	FALSE	TRUE
Oasl2	FALSE	FALSE	FALSE	TRUE	FALSE	FALSE	FALSE	TRUE
Isg15	FALSE	FALSE	FALSE	TRUE	FALSE	FALSE	FALSE	TRUE
Stat1	FALSE	FALSE	FALSE	TRUE	FALSE	FALSE	FALSE	TRUE
Rtp4	FALSE	FALSE	FALSE	TRUE	FALSE	FALSE	FALSE	TRUE
Irf7	FALSE	FALSE	FALSE	TRUE	FALSE	FALSE	FALSE	TRUE
Igtp	FALSE	FALSE	FALSE	TRUE	FALSE	FALSE	FALSE	TRUE
Ifit3	FALSE	FALSE	FALSE	TRUE	FALSE	FALSE	FALSE	TRUE
Bst2	FALSE	FALSE	FALSE	TRUE	FALSE	FALSE	FALSE	TRUE
Ifi35	FALSE	FALSE	FALSE	TRUE	FALSE	FALSE	FALSE	TRUE
Rsad2	FALSE	FALSE	FALSE	TRUE	FALSE	FALSE	FALSE	TRUE
Slfn8	FALSE	FALSE	FALSE	TRUE	FALSE	FALSE	FALSE	TRUE
Ifi203	FALSE	FALSE	FALSE	TRUE	FALSE	FALSE	FALSE	TRUE
Herc6	FALSE	FALSE	FALSE	TRUE	FALSE	FALSE	FALSE	TRUE
Rnf213	FALSE	FALSE	FALSE	TRUE	FALSE	FALSE	FALSE	TRUE
Eif2ak2	FALSE	FALSE	FALSE	TRUE	FALSE	FALSE	FALSE	TRUE
Sp140	FALSE	FALSE	FALSE	TRUE	FALSE	FALSE	FALSE	FALSE
Irgm1	FALSE	FALSE	FALSE	TRUE	FALSE	FALSE	FALSE	TRUE
Slfn5	FALSE	FALSE	FALSE	TRUE	FALSE	FALSE	FALSE	TRUE
Oas1a	FALSE	FALSE	FALSE	TRUE	FALSE	FALSE	FALSE	FALSE
Chchd7	FALSE	FALSE	FALSE	TRUE	FALSE	FALSE	FALSE	FALSE
Ly6e	FALSE	FALSE	FALSE	TRUE	FALSE	FALSE	FALSE	TRUE
Tor1aip1	FALSE	FALSE	FALSE	TRUE	FALSE	FALSE	FALSE	FALSE
Parp9	FALSE	FALSE	FALSE	TRUE	FALSE	FALSE	FALSE	TRUE
Xaf1	FALSE	FALSE	FALSE	TRUE	FALSE	FALSE	FALSE	TRUE
Mndal	FALSE	FALSE	FALSE	TRUE	FALSE	FALSE	FALSE	TRUE
Trim12c	FALSE	FALSE	FALSE	TRUE	FALSE	FALSE	FALSE	TRUE
Ddx58	FALSE	FALSE	FALSE	TRUE	FALSE	FALSE	FALSE	TRUE
F2r	FALSE	FALSE	FALSE	TRUE	FALSE	FALSE	FALSE	FALSE
Treml2	FALSE	FALSE	FALSE	TRUE	FALSE	FALSE	FALSE	TRUE
F830016B08Rik	FALSE	FALSE	FALSE	TRUE	FALSE	FALSE	FALSE	TRUE
Epsti1	FALSE	FALSE	FALSE	TRUE	FALSE	FALSE	FALSE	TRUE
Oasl1	FALSE	FALSE	FALSE	TRUE	FALSE	FALSE	FALSE	TRUE
Ube2l6	FALSE	FALSE	FALSE	TRUE	FALSE	FALSE	FALSE	TRUE
Gbp2	FALSE	FALSE	FALSE	TRUE	FALSE	FALSE	FALSE	TRUE
Usp18	FALSE	FALSE	FALSE	TRUE	FALSE	FALSE	FALSE	TRUE
Psmb2	FALSE	FALSE	FALSE	TRUE	FALSE	FALSE	FALSE	FALSE
Gbp7	FALSE	FALSE	FALSE	TRUE	FALSE	FALSE	FALSE	TRUE
Cmpk2	FALSE	FALSE	FALSE	TRUE	FALSE	FALSE	FALSE	TRUE
9930111J21Rik2	FALSE	FALSE	FALSE	TRUE	FALSE	FALSE	FALSE	TRUE
Zbp1	FALSE	FALSE	FALSE	TRUE	FALSE	FALSE	FALSE	TRUE
Flii	FALSE	FALSE	FALSE	TRUE	FALSE	FALSE	FALSE	FALSE
Dlgap4	FALSE	FALSE	FALSE	TRUE	FALSE	FALSE	FALSE	FALSE
Samhd1	FALSE	FALSE	FALSE	TRUE	FALSE	FALSE	FALSE	TRUE
Abhd17b	FALSE	FALSE	FALSE	TRUE	FALSE	FALSE	FALSE	FALSE
Kctd10	FALSE	FALSE	FALSE	TRUE	FALSE	FALSE	FALSE	FALSE
Lgals3bp	FALSE	FALSE	FALSE	TRUE	FALSE	FALSE	FALSE	TRUE
Smim24	FALSE	FALSE	FALSE	TRUE	FALSE	FALSE	FALSE	FALSE
Irgm2	FALSE	FALSE	FALSE	TRUE	FALSE	FALSE	FALSE	TRUE
Hdgf	FALSE	FALSE	FALSE	TRUE	FALSE	FALSE	FALSE	FALSE
Zfp839	FALSE	FALSE	FALSE	TRUE	FALSE	FALSE	FALSE	FALSE
Ncoa7	FALSE	FALSE	FALSE	TRUE	FALSE	FALSE	FALSE	TRUE
Poglut1	FALSE	FALSE	FALSE	TRUE	FALSE	FALSE	FALSE	FALSE
Trim30c	FALSE	FALSE	FALSE	TRUE	FALSE	FALSE	FALSE	FALSE
Mitd1	FALSE	FALSE	FALSE	TRUE	FALSE	FALSE	FALSE	TRUE
Nmi	FALSE	FALSE	FALSE	TRUE	FALSE	FALSE	FALSE	FALSE
Nol12	FALSE	FALSE	FALSE	TRUE	FALSE	FALSE	FALSE	FALSE
Ddx60	FALSE	FALSE	FALSE	TRUE	FALSE	FALSE	FALSE	FALSE
Psmb8	FALSE	FALSE	FALSE	TRUE	FALSE	FALSE	FALSE	TRUE
Ifit2	FALSE	FALSE	FALSE	TRUE	FALSE	FALSE	FALSE	TRUE
Gbp5	FALSE	FALSE	FALSE	TRUE	FALSE	FALSE	FALSE	TRUE
Isg20	FALSE	FALSE	FALSE	TRUE	FALSE	FALSE	FALSE	TRUE
Stat2	FALSE	FALSE	FALSE	TRUE	FALSE	FALSE	FALSE	TRUE
Prr3	FALSE	FALSE	FALSE	TRUE	FALSE	FALSE	FALSE	FALSE
Wbp1l	FALSE	FALSE	FALSE	TRUE	FALSE	FALSE	FALSE	FALSE
Timm8b	FALSE	FALSE	FALSE	TRUE	FALSE	FALSE	FALSE	FALSE
Mageh1	FALSE	FALSE	FALSE	TRUE	FALSE	FALSE	FALSE	FALSE
AI314180	FALSE	FALSE	FALSE	TRUE	FALSE	FALSE	FALSE	FALSE
Zfp30	FALSE	FALSE	FALSE	TRUE	FALSE	FALSE	FALSE	FALSE
1810030O07Rik	FALSE	FALSE	FALSE	TRUE	FALSE	FALSE	FALSE	FALSE
Ccnd2	FALSE	FALSE	FALSE	TRUE	TRUE	FALSE	FALSE	FALSE
Parp12	FALSE	FALSE	FALSE	TRUE	FALSE	FALSE	FALSE	FALSE
Usp5	FALSE	FALSE	FALSE	TRUE	FALSE	FALSE	FALSE	FALSE
Gm13822	FALSE	FALSE	FALSE	TRUE	FALSE	FALSE	FALSE	FALSE
Ppa1	FALSE	FALSE	FALSE	TRUE	FALSE	FALSE	FALSE	TRUE
Shmt2	FALSE	FALSE	FALSE	TRUE	FALSE	FALSE	FALSE	FALSE
Nub1	FALSE	FALSE	FALSE	TRUE	FALSE	FALSE	FALSE	FALSE
Lfng	FALSE	FALSE	FALSE	TRUE	FALSE	FALSE	FALSE	FALSE
Tspo	FALSE	FALSE	FALSE	TRUE	FALSE	FALSE	FALSE	FALSE
Mecom	FALSE	FALSE	FALSE	TRUE	FALSE	FALSE	FALSE	FALSE
Dyrk1a	FALSE	FALSE	FALSE	TRUE	FALSE	FALSE	FALSE	FALSE
Gm12185	FALSE	FALSE	FALSE	TRUE	FALSE	FALSE	FALSE	TRUE
Zufsp	FALSE	FALSE	FALSE	TRUE	FALSE	FALSE	FALSE	TRUE
Il27	FALSE	FALSE	FALSE	TRUE	FALSE	FALSE	FALSE	FALSE
Gpatch8	FALSE	FALSE	FALSE	TRUE	FALSE	FALSE	FALSE	FALSE
H2-T22	FALSE	FALSE	FALSE	TRUE	FALSE	FALSE	FALSE	FALSE
Zfp85	FALSE	FALSE	FALSE	TRUE	FALSE	FALSE	FALSE	FALSE
Gm16141	FALSE	FALSE	FALSE	FALSE	TRUE	FALSE	FALSE	FALSE
Fam212a	FALSE	FALSE	FALSE	FALSE	TRUE	FALSE	FALSE	FALSE
AI467606	FALSE	FALSE	FALSE	FALSE	TRUE	FALSE	FALSE	FALSE
Ppp1r10	FALSE	FALSE	FALSE	FALSE	TRUE	FALSE	FALSE	FALSE
Pik3ip1	FALSE	FALSE	FALSE	FALSE	TRUE	FALSE	FALSE	FALSE
Rpl17	FALSE	FALSE	FALSE	FALSE	TRUE	FALSE	FALSE	FALSE
Cited2	FALSE	FALSE	FALSE	FALSE	TRUE	FALSE	FALSE	FALSE
Hist2h4	FALSE	FALSE	FALSE	FALSE	TRUE	FALSE	FALSE	FALSE
Hist1h2ac	FALSE	FALSE	FALSE	FALSE	TRUE	FALSE	FALSE	FALSE
2610037D02Rik	FALSE	FALSE	FALSE	FALSE	TRUE	FALSE	FALSE	FALSE
A630072M18Rik	FALSE	FALSE	FALSE	FALSE	TRUE	FALSE	FALSE	FALSE
Rpl10	FALSE	FALSE	FALSE	FALSE	TRUE	FALSE	FALSE	FALSE
Dapp1	FALSE	FALSE	FALSE	FALSE	TRUE	FALSE	FALSE	FALSE
Hist1h1d	FALSE	FALSE	FALSE	FALSE	TRUE	FALSE	FALSE	FALSE
Luc7l3	FALSE	FALSE	FALSE	FALSE	TRUE	FALSE	FALSE	FALSE
Meis1	FALSE	FALSE	FALSE	FALSE	TRUE	FALSE	FALSE	FALSE
Xbp1	FALSE	FALSE	FALSE	FALSE	TRUE	FALSE	FALSE	FALSE
Gm20045	FALSE	FALSE	FALSE	FALSE	TRUE	FALSE	FALSE	FALSE
Arhgap45	FALSE	FALSE	FALSE	FALSE	TRUE	FALSE	FALSE	FALSE
Rpl35a	FALSE	FALSE	FALSE	FALSE	TRUE	FALSE	FALSE	FALSE
Rpl9	FALSE	FALSE	FALSE	FALSE	TRUE	FALSE	FALSE	FALSE
Rpl30	FALSE	FALSE	FALSE	FALSE	TRUE	FALSE	FALSE	FALSE
Zfp760	FALSE	FALSE	FALSE	FALSE	TRUE	FALSE	FALSE	FALSE
Rps27	FALSE	FALSE	FALSE	FALSE	TRUE	FALSE	FALSE	FALSE
Snhg20	FALSE	FALSE	FALSE	FALSE	TRUE	FALSE	FALSE	FALSE
Hist1h3d	FALSE	FALSE	FALSE	FALSE	TRUE	FALSE	FALSE	FALSE
Gm19590	FALSE	FALSE	FALSE	FALSE	TRUE	FALSE	FALSE	FALSE
Rpl5	FALSE	FALSE	FALSE	FALSE	TRUE	FALSE	FALSE	FALSE
Tmem80	FALSE	FALSE	FALSE	FALSE	TRUE	FALSE	FALSE	FALSE
Rpl23	FALSE	FALSE	FALSE	FALSE	TRUE	FALSE	FALSE	FALSE
Itga4	FALSE	FALSE	FALSE	FALSE	TRUE	FALSE	FALSE	FALSE
Rps5	FALSE	FALSE	FALSE	FALSE	TRUE	FALSE	FALSE	FALSE
Kcnq1ot1	FALSE	FALSE	FALSE	FALSE	TRUE	FALSE	FALSE	FALSE
Arl10	FALSE	FALSE	FALSE	FALSE	TRUE	FALSE	FALSE	FALSE
Lyl1	FALSE	FALSE	FALSE	FALSE	TRUE	FALSE	FALSE	FALSE
Gm3448	FALSE	FALSE	FALSE	FALSE	TRUE	FALSE	FALSE	FALSE
Rpl24	FALSE	FALSE	FALSE	FALSE	TRUE	FALSE	FALSE	FALSE
Nrip1	FALSE	FALSE	FALSE	FALSE	TRUE	FALSE	FALSE	FALSE
Tmem140	FALSE	FALSE	FALSE	FALSE	TRUE	FALSE	FALSE	TRUE
Pnisr	FALSE	FALSE	FALSE	FALSE	TRUE	FALSE	FALSE	FALSE
Tmem126b	FALSE	FALSE	FALSE	FALSE	TRUE	FALSE	FALSE	FALSE
Map3k14	FALSE	FALSE	FALSE	FALSE	TRUE	FALSE	FALSE	FALSE
Zfp397	FALSE	FALSE	FALSE	FALSE	TRUE	FALSE	FALSE	FALSE
Adgrg1	FALSE	FALSE	FALSE	FALSE	TRUE	FALSE	FALSE	FALSE
Rpl37a	FALSE	FALSE	FALSE	FALSE	TRUE	FALSE	FALSE	FALSE
Rpl26	FALSE	FALSE	FALSE	FALSE	TRUE	FALSE	FALSE	FALSE
Hist4h4	FALSE	FALSE	FALSE	FALSE	TRUE	FALSE	FALSE	FALSE
Abcg3	FALSE	FALSE	FALSE	FALSE	TRUE	FALSE	FALSE	FALSE
Slfn2	FALSE	FALSE	FALSE	FALSE	TRUE	FALSE	FALSE	TRUE
Rpl27a	FALSE	FALSE	FALSE	FALSE	TRUE	FALSE	FALSE	FALSE
Rpl37	FALSE	FALSE	FALSE	FALSE	TRUE	FALSE	FALSE	FALSE
Trmt13	FALSE	FALSE	FALSE	FALSE	TRUE	FALSE	FALSE	FALSE
Naca	FALSE	FALSE	FALSE	FALSE	TRUE	FALSE	FALSE	FALSE
Letm2	FALSE	FALSE	FALSE	FALSE	TRUE	FALSE	FALSE	FALSE
Rpl11	FALSE	FALSE	FALSE	FALSE	TRUE	FALSE	FALSE	FALSE
Gm36839	FALSE	FALSE	FALSE	FALSE	TRUE	FALSE	FALSE	FALSE
Gimap8	FALSE	FALSE	FALSE	FALSE	TRUE	FALSE	FALSE	FALSE
Ap2b1	FALSE	FALSE	FALSE	FALSE	TRUE	FALSE	FALSE	FALSE
5031425E22Rik	FALSE	FALSE	FALSE	FALSE	TRUE	FALSE	FALSE	FALSE
Mtdh	FALSE	FALSE	FALSE	FALSE	TRUE	FALSE	FALSE	FALSE
E230032D23Rik	FALSE	FALSE	FALSE	FALSE	TRUE	FALSE	FALSE	FALSE
Mast4	FALSE	FALSE	FALSE	FALSE	TRUE	FALSE	FALSE	FALSE
Uqcc3	FALSE	FALSE	FALSE	FALSE	TRUE	FALSE	FALSE	FALSE
Rps13	FALSE	FALSE	FALSE	FALSE	TRUE	FALSE	FALSE	FALSE
Gdpgp1	FALSE	FALSE	FALSE	FALSE	TRUE	FALSE	FALSE	FALSE
AC149090.1	FALSE	FALSE	FALSE	FALSE	TRUE	FALSE	FALSE	FALSE
Gm17473	FALSE	FALSE	FALSE	FALSE	TRUE	FALSE	FALSE	FALSE
Tia1	FALSE	FALSE	FALSE	FALSE	TRUE	FALSE	FALSE	FALSE
Guf1	FALSE	FALSE	FALSE	FALSE	TRUE	FALSE	FALSE	FALSE
Rpl18a	FALSE	FALSE	FALSE	FALSE	TRUE	FALSE	FALSE	FALSE
Gm44777	FALSE	FALSE	FALSE	FALSE	TRUE	FALSE	FALSE	FALSE
Cebpb	FALSE	FALSE	FALSE	FALSE	FALSE	TRUE	FALSE	FALSE
Dusp5	FALSE	FALSE	FALSE	FALSE	FALSE	TRUE	FALSE	FALSE
Maff	FALSE	FALSE	FALSE	FALSE	FALSE	TRUE	FALSE	FALSE
Dusp2	FALSE	FALSE	FALSE	FALSE	FALSE	TRUE	FALSE	FALSE
Wwc2	FALSE	FALSE	FALSE	FALSE	FALSE	TRUE	FALSE	FALSE
Per1	FALSE	FALSE	FALSE	FALSE	FALSE	TRUE	FALSE	FALSE
Dennd4a	FALSE	FALSE	FALSE	FALSE	FALSE	TRUE	FALSE	FALSE
Csrnp1	FALSE	FALSE	FALSE	FALSE	FALSE	TRUE	FALSE	FALSE
Yrdc	FALSE	FALSE	FALSE	FALSE	FALSE	TRUE	FALSE	FALSE
Fosl2	FALSE	FALSE	FALSE	FALSE	FALSE	TRUE	FALSE	FALSE
Ier5	FALSE	FALSE	FALSE	FALSE	FALSE	TRUE	FALSE	FALSE
Pim3	FALSE	FALSE	FALSE	FALSE	FALSE	TRUE	FALSE	FALSE
Ranbp2	FALSE	FALSE	FALSE	FALSE	FALSE	TRUE	FALSE	FALSE
Nkx2-3	FALSE	FALSE	FALSE	FALSE	FALSE	TRUE	FALSE	FALSE
Plk2	FALSE	FALSE	FALSE	FALSE	FALSE	TRUE	FALSE	FALSE
Lysmd3	FALSE	FALSE	FALSE	FALSE	FALSE	TRUE	FALSE	FALSE
Siah2	FALSE	FALSE	FALSE	FALSE	FALSE	TRUE	FALSE	FALSE
Ing2	FALSE	FALSE	FALSE	FALSE	FALSE	TRUE	FALSE	FALSE
Zcchc6	FALSE	FALSE	FALSE	FALSE	FALSE	TRUE	FALSE	FALSE
Sertad1	FALSE	FALSE	FALSE	FALSE	FALSE	TRUE	FALSE	FALSE
Snu13	FALSE	FALSE	FALSE	FALSE	FALSE	TRUE	FALSE	FALSE
Vamp3	FALSE	FALSE	FALSE	FALSE	FALSE	TRUE	FALSE	FALSE
Klf13	FALSE	FALSE	FALSE	FALSE	FALSE	TRUE	FALSE	FALSE
Rnf4	FALSE	FALSE	FALSE	FALSE	FALSE	TRUE	FALSE	FALSE
Neurl3	FALSE	FALSE	FALSE	FALSE	FALSE	TRUE	FALSE	FALSE
Etv3	FALSE	FALSE	FALSE	FALSE	FALSE	TRUE	FALSE	FALSE
Slc38a1	FALSE	FALSE	FALSE	FALSE	FALSE	TRUE	FALSE	FALSE
Mapk6	FALSE	FALSE	FALSE	FALSE	FALSE	TRUE	FALSE	FALSE
Ptp4a1	FALSE	FALSE	FALSE	FALSE	FALSE	TRUE	FALSE	FALSE
Dyrk3	FALSE	FALSE	FALSE	FALSE	FALSE	TRUE	FALSE	FALSE
Ndel1	FALSE	FALSE	FALSE	FALSE	FALSE	TRUE	FALSE	FALSE
Tuba1b	FALSE	FALSE	FALSE	FALSE	FALSE	FALSE	TRUE	FALSE
Prim1	FALSE	FALSE	FALSE	FALSE	FALSE	FALSE	TRUE	FALSE
Tubb5	FALSE	FALSE	FALSE	FALSE	FALSE	FALSE	TRUE	FALSE
Cdt1	FALSE	FALSE	FALSE	FALSE	FALSE	FALSE	TRUE	FALSE
Rpa2	FALSE	FALSE	FALSE	FALSE	FALSE	FALSE	TRUE	FALSE
Dek	FALSE	FALSE	FALSE	FALSE	FALSE	FALSE	TRUE	FALSE
Hint1	FALSE	FALSE	FALSE	FALSE	FALSE	FALSE	TRUE	FALSE
Rfc2	FALSE	FALSE	FALSE	FALSE	FALSE	FALSE	TRUE	FALSE
Cdk4	FALSE	FALSE	FALSE	FALSE	FALSE	FALSE	TRUE	FALSE
Dhfr	FALSE	FALSE	FALSE	FALSE	FALSE	FALSE	TRUE	FALSE
Lmnb1	FALSE	FALSE	FALSE	FALSE	FALSE	FALSE	TRUE	FALSE
Hspa8	FALSE	FALSE	FALSE	FALSE	FALSE	FALSE	TRUE	FALSE
E2f1	FALSE	FALSE	FALSE	FALSE	FALSE	FALSE	TRUE	FALSE
Dnajc9	FALSE	FALSE	FALSE	FALSE	FALSE	FALSE	TRUE	FALSE
Ybx1	FALSE	FALSE	FALSE	FALSE	FALSE	FALSE	TRUE	FALSE
Rfc5	FALSE	FALSE	FALSE	FALSE	FALSE	FALSE	TRUE	FALSE
Rrm1	FALSE	FALSE	FALSE	FALSE	FALSE	FALSE	TRUE	FALSE
Tyms	FALSE	FALSE	FALSE	FALSE	FALSE	FALSE	TRUE	FALSE
Hat1	FALSE	FALSE	FALSE	FALSE	FALSE	FALSE	TRUE	FALSE
Pold1	FALSE	FALSE	FALSE	FALSE	FALSE	FALSE	TRUE	FALSE
Atad2	FALSE	FALSE	FALSE	FALSE	FALSE	FALSE	TRUE	FALSE
Usp1	FALSE	FALSE	FALSE	FALSE	FALSE	FALSE	TRUE	FALSE
Tpi1	FALSE	FALSE	FALSE	FALSE	FALSE	FALSE	TRUE	FALSE
Fen1	FALSE	FALSE	FALSE	FALSE	FALSE	FALSE	TRUE	FALSE
Chaf1a	FALSE	FALSE	FALSE	FALSE	FALSE	FALSE	TRUE	FALSE
Nrm	FALSE	FALSE	FALSE	FALSE	FALSE	FALSE	TRUE	FALSE
Hmgb2	FALSE	FALSE	FALSE	FALSE	FALSE	FALSE	TRUE	FALSE
Snrpb	FALSE	FALSE	FALSE	FALSE	FALSE	FALSE	TRUE	FALSE
Rnaseh2b	FALSE	FALSE	FALSE	FALSE	FALSE	FALSE	TRUE	FALSE
Tmpo	FALSE	FALSE	FALSE	FALSE	FALSE	FALSE	TRUE	FALSE
Alyref	FALSE	FALSE	FALSE	FALSE	FALSE	FALSE	TRUE	FALSE
Hirip3	FALSE	FALSE	FALSE	FALSE	FALSE	FALSE	TRUE	FALSE
Cks1b	FALSE	FALSE	FALSE	FALSE	FALSE	FALSE	TRUE	FALSE
Pmf1	FALSE	FALSE	FALSE	FALSE	FALSE	FALSE	TRUE	FALSE
Sumo2	FALSE	FALSE	FALSE	FALSE	FALSE	FALSE	TRUE	FALSE
Pcna	FALSE	FALSE	FALSE	FALSE	FALSE	FALSE	TRUE	FALSE
Gapdh	FALSE	FALSE	FALSE	FALSE	FALSE	FALSE	TRUE	FALSE
Rfc4	FALSE	FALSE	FALSE	FALSE	FALSE	FALSE	TRUE	FALSE
Nudc	FALSE	FALSE	FALSE	FALSE	FALSE	FALSE	TRUE	FALSE
Rmi2	FALSE	FALSE	FALSE	FALSE	FALSE	FALSE	TRUE	FALSE
Dtl	FALSE	FALSE	FALSE	FALSE	FALSE	FALSE	TRUE	FALSE
Ybx3	FALSE	FALSE	FALSE	FALSE	FALSE	FALSE	TRUE	FALSE
Hnrnpd	FALSE	FALSE	FALSE	FALSE	FALSE	FALSE	TRUE	FALSE
Topbp1	FALSE	FALSE	FALSE	FALSE	FALSE	FALSE	TRUE	FALSE
Cenps	FALSE	FALSE	FALSE	FALSE	FALSE	FALSE	TRUE	FALSE
Mrpl18	FALSE	FALSE	FALSE	FALSE	FALSE	FALSE	TRUE	FALSE
Ssrp1	FALSE	FALSE	FALSE	FALSE	FALSE	FALSE	TRUE	FALSE
Mx1	FALSE	FALSE	FALSE	FALSE	FALSE	FALSE	FALSE	TRUE
Serpina3g	FALSE	FALSE	FALSE	FALSE	FALSE	FALSE	FALSE	TRUE
Tap1	FALSE	FALSE	FALSE	FALSE	FALSE	FALSE	FALSE	TRUE
Gbp3	FALSE	FALSE	FALSE	FALSE	FALSE	FALSE	FALSE	TRUE
Trim12a	FALSE	FALSE	FALSE	FALSE	FALSE	FALSE	FALSE	TRUE
Dhx58	FALSE	FALSE	FALSE	FALSE	FALSE	FALSE	FALSE	TRUE
Cxcl10	FALSE	FALSE	FALSE	FALSE	FALSE	FALSE	FALSE	TRUE
Sp100	FALSE	FALSE	FALSE	FALSE	FALSE	FALSE	FALSE	TRUE
Trim30a	FALSE	FALSE	FALSE	FALSE	FALSE	FALSE	FALSE	TRUE
Ms4a6b	FALSE	FALSE	FALSE	FALSE	FALSE	FALSE	FALSE	TRUE
Gbp4	FALSE	FALSE	FALSE	FALSE	FALSE	FALSE	FALSE	TRUE
Ifih1	FALSE	FALSE	FALSE	FALSE	FALSE	FALSE	FALSE	TRUE
Psmb10	FALSE	FALSE	FALSE	FALSE	FALSE	FALSE	FALSE	TRUE
Oas3	FALSE	FALSE	FALSE	FALSE	FALSE	FALSE	FALSE	TRUE
Gm4841	FALSE	FALSE	FALSE	FALSE	FALSE	FALSE	FALSE	TRUE
Dtx3l	FALSE	FALSE	FALSE	FALSE	FALSE	FALSE	FALSE	TRUE
Psme1	FALSE	FALSE	FALSE	FALSE	FALSE	FALSE	FALSE	TRUE
Samd9l	FALSE	FALSE	FALSE	FALSE	FALSE	FALSE	FALSE	TRUE
Serpina3f	FALSE	FALSE	FALSE	FALSE	FALSE	FALSE	FALSE	TRUE
H2-T23	FALSE	FALSE	FALSE	FALSE	FALSE	FALSE	FALSE	TRUE
Tor3a	FALSE	FALSE	FALSE	FALSE	FALSE	FALSE	FALSE	TRUE
Ms4a6c	FALSE	FALSE	FALSE	FALSE	FALSE	FALSE	FALSE	TRUE
Gbp6	FALSE	FALSE	FALSE	FALSE	FALSE	FALSE	FALSE	TRUE
Ifit3b	FALSE	FALSE	FALSE	FALSE	FALSE	FALSE	FALSE	TRUE
Batf2	FALSE	FALSE	FALSE	FALSE	FALSE	FALSE	FALSE	TRUE
Gbp9	FALSE	FALSE	FALSE	FALSE	FALSE	FALSE	FALSE	TRUE
Ifit1bl1	FALSE	FALSE	FALSE	FALSE	FALSE	FALSE	FALSE	TRUE
Trafd1	FALSE	FALSE	FALSE	FALSE	FALSE	FALSE	FALSE	TRUE
Phf11b	FALSE	FALSE	FALSE	FALSE	FALSE	FALSE	FALSE	TRUE
Ehd4	FALSE	FALSE	FALSE	FALSE	FALSE	FALSE	FALSE	TRUE
Gbp8	FALSE	FALSE	FALSE	FALSE	FALSE	FALSE	FALSE	TRUE
Etnk1	FALSE	FALSE	FALSE	FALSE	FALSE	FALSE	FALSE	TRUE
Znfx1	FALSE	FALSE	FALSE	FALSE	FALSE	FALSE	FALSE	TRUE
Cd274	FALSE	FALSE	FALSE	FALSE	FALSE	FALSE	FALSE	TRUE
Tgtp1	FALSE	FALSE	FALSE	FALSE	FALSE	FALSE	FALSE	TRUE
Mov10	FALSE	FALSE	FALSE	FALSE	FALSE	FALSE	FALSE	TRUE
Irf1	FALSE	FALSE	FALSE	FALSE	FALSE	FALSE	FALSE	TRUE
Irf9	FALSE	FALSE	FALSE	FALSE	FALSE	FALSE	FALSE	TRUE
AW011738	FALSE	FALSE	FALSE	FALSE	FALSE	FALSE	FALSE	TRUE

## Sheet: HSC_LSK_cluster_overlap
gene	HSC_Quiescent	HSC_Metabolism	HSC_Activated	HSC_Interferon	HSC_Acute-Activation	HSC_Cell-cycle	LSK_Primed	LSK_Metabolism	LSK_Primitive	LSK_Cell-cycle	LSK_Acute-Activation	LSK_Interferon	LSK_Interferon cell-cycle	LSK_Myeloid
Txnip	TRUE	FALSE	FALSE	FALSE	FALSE	FALSE	FALSE	FALSE	TRUE	FALSE	TRUE	FALSE	FALSE	FALSE
Rps24	TRUE	FALSE	FALSE	FALSE	FALSE	FALSE	TRUE	FALSE	FALSE	FALSE	TRUE	FALSE	FALSE	FALSE
Rplp1	TRUE	FALSE	FALSE	FALSE	TRUE	FALSE	TRUE	FALSE	TRUE	FALSE	FALSE	FALSE	FALSE	FALSE
Fau	TRUE	FALSE	FALSE	FALSE	FALSE	FALSE	TRUE	FALSE	TRUE	FALSE	FALSE	FALSE	FALSE	FALSE
Mllt3	TRUE	FALSE	FALSE	FALSE	FALSE	FALSE	FALSE	FALSE	TRUE	FALSE	FALSE	FALSE	FALSE	FALSE
Rps14	TRUE	FALSE	FALSE	FALSE	FALSE	FALSE	TRUE	FALSE	TRUE	FALSE	FALSE	FALSE	FALSE	FALSE
Rpl9	TRUE	FALSE	FALSE	FALSE	FALSE	FALSE	TRUE	FALSE	TRUE	FALSE	FALSE	FALSE	FALSE	FALSE
Rps27	TRUE	FALSE	FALSE	FALSE	TRUE	FALSE	FALSE	FALSE	TRUE	FALSE	TRUE	FALSE	FALSE	FALSE
Rpl30	TRUE	FALSE	FALSE	FALSE	TRUE	FALSE	TRUE	FALSE	TRUE	FALSE	FALSE	FALSE	FALSE	FALSE
Pdzk1ip1	TRUE	FALSE	FALSE	FALSE	FALSE	FALSE	FALSE	FALSE	TRUE	FALSE	FALSE	FALSE	FALSE	FALSE
Ltb	TRUE	FALSE	FALSE	FALSE	FALSE	FALSE	FALSE	FALSE	TRUE	FALSE	FALSE	FALSE	FALSE	FALSE
Rsrp1	TRUE	FALSE	FALSE	FALSE	FALSE	FALSE	TRUE	FALSE	FALSE	FALSE	FALSE	FALSE	FALSE	FALSE
Pfdn5	TRUE	FALSE	FALSE	FALSE	FALSE	FALSE	FALSE	FALSE	TRUE	FALSE	FALSE	FALSE	FALSE	FALSE
Rps4x	TRUE	FALSE	FALSE	FALSE	FALSE	FALSE	FALSE	FALSE	FALSE	FALSE	FALSE	FALSE	FALSE	FALSE
Rps9	TRUE	FALSE	FALSE	FALSE	FALSE	FALSE	TRUE	FALSE	TRUE	FALSE	FALSE	FALSE	FALSE	FALSE
Hlf	TRUE	FALSE	TRUE	FALSE	FALSE	FALSE	FALSE	FALSE	TRUE	FALSE	FALSE	FALSE	FALSE	FALSE
mt-Co1	TRUE	FALSE	TRUE	FALSE	TRUE	FALSE	FALSE	FALSE	FALSE	FALSE	TRUE	FALSE	FALSE	FALSE
Rpl7	TRUE	FALSE	FALSE	FALSE	FALSE	FALSE	TRUE	FALSE	FALSE	FALSE	FALSE	FALSE	FALSE	FALSE
Rpl13	TRUE	FALSE	FALSE	FALSE	FALSE	FALSE	TRUE	FALSE	TRUE	FALSE	FALSE	FALSE	FALSE	FALSE
Rps10	TRUE	FALSE	FALSE	FALSE	FALSE	FALSE	TRUE	FALSE	TRUE	FALSE	FALSE	FALSE	FALSE	FALSE
Rpl26	TRUE	FALSE	FALSE	FALSE	FALSE	FALSE	TRUE	FALSE	TRUE	FALSE	FALSE	FALSE	FALSE	FALSE
Rpl27a	TRUE	FALSE	FALSE	FALSE	FALSE	FALSE	TRUE	FALSE	FALSE	FALSE	FALSE	FALSE	FALSE	FALSE
Itm2b	TRUE	FALSE	FALSE	FALSE	FALSE	FALSE	FALSE	FALSE	FALSE	FALSE	FALSE	FALSE	FALSE	FALSE
Gimap6	TRUE	FALSE	FALSE	FALSE	FALSE	FALSE	FALSE	FALSE	TRUE	FALSE	FALSE	FALSE	FALSE	FALSE
Cox7a2l	TRUE	FALSE	FALSE	FALSE	FALSE	FALSE	TRUE	FALSE	TRUE	FALSE	FALSE	FALSE	FALSE	FALSE
Mettl7a1	TRUE	FALSE	FALSE	FALSE	FALSE	FALSE	FALSE	FALSE	FALSE	FALSE	FALSE	FALSE	FALSE	FALSE
mt-Atp6	TRUE	FALSE	FALSE	FALSE	FALSE	FALSE	FALSE	FALSE	FALSE	FALSE	TRUE	FALSE	FALSE	FALSE
Rpl21	TRUE	FALSE	FALSE	FALSE	FALSE	FALSE	FALSE	FALSE	TRUE	FALSE	FALSE	FALSE	FALSE	FALSE
Ypel3	TRUE	FALSE	TRUE	FALSE	FALSE	FALSE	FALSE	FALSE	FALSE	FALSE	FALSE	FALSE	FALSE	FALSE
Gimap1	TRUE	FALSE	FALSE	FALSE	FALSE	FALSE	FALSE	FALSE	TRUE	FALSE	FALSE	FALSE	FALSE	FALSE
Smpdl3a	TRUE	FALSE	FALSE	FALSE	FALSE	FALSE	FALSE	FALSE	FALSE	FALSE	FALSE	FALSE	FALSE	FALSE
Clec2d	TRUE	FALSE	FALSE	FALSE	FALSE	FALSE	FALSE	FALSE	FALSE	FALSE	FALSE	TRUE	TRUE	FALSE
Procr	TRUE	FALSE	FALSE	FALSE	FALSE	FALSE	FALSE	FALSE	TRUE	FALSE	FALSE	FALSE	FALSE	FALSE
Rpl17	TRUE	FALSE	FALSE	FALSE	FALSE	FALSE	TRUE	FALSE	TRUE	FALSE	TRUE	FALSE	FALSE	FALSE
Gstm1	TRUE	FALSE	FALSE	FALSE	FALSE	FALSE	FALSE	FALSE	TRUE	FALSE	FALSE	FALSE	FALSE	FALSE
Rpl37a	TRUE	FALSE	FALSE	FALSE	TRUE	FALSE	FALSE	FALSE	FALSE	FALSE	TRUE	FALSE	FALSE	FALSE
Rpl19	TRUE	FALSE	FALSE	FALSE	FALSE	FALSE	TRUE	FALSE	TRUE	FALSE	FALSE	FALSE	FALSE	FALSE
Rps21	TRUE	FALSE	FALSE	FALSE	TRUE	FALSE	FALSE	FALSE	FALSE	FALSE	TRUE	FALSE	FALSE	FALSE
Ifitm1	TRUE	FALSE	FALSE	FALSE	FALSE	FALSE	FALSE	FALSE	TRUE	FALSE	FALSE	FALSE	FALSE	FALSE
Lmo2	TRUE	FALSE	FALSE	FALSE	FALSE	FALSE	FALSE	FALSE	TRUE	FALSE	FALSE	FALSE	FALSE	FALSE
Rps5	TRUE	FALSE	FALSE	FALSE	FALSE	FALSE	TRUE	FALSE	FALSE	FALSE	FALSE	FALSE	FALSE	FALSE
Tpt1	TRUE	FALSE	FALSE	FALSE	FALSE	FALSE	TRUE	FALSE	TRUE	FALSE	FALSE	FALSE	FALSE	FALSE
Pik3ip1	TRUE	FALSE	FALSE	FALSE	FALSE	FALSE	FALSE	FALSE	FALSE	FALSE	TRUE	FALSE	FALSE	FALSE
Ogt	TRUE	FALSE	FALSE	FALSE	FALSE	FALSE	TRUE	FALSE	FALSE	FALSE	FALSE	FALSE	FALSE	FALSE
Rpl5	TRUE	FALSE	FALSE	FALSE	FALSE	FALSE	TRUE	FALSE	TRUE	FALSE	FALSE	FALSE	FALSE	FALSE
Malat1	TRUE	FALSE	TRUE	FALSE	FALSE	FALSE	FALSE	FALSE	TRUE	FALSE	FALSE	FALSE	FALSE	FALSE
Rpl18a	TRUE	FALSE	FALSE	FALSE	FALSE	FALSE	TRUE	FALSE	FALSE	FALSE	FALSE	FALSE	FALSE	FALSE
Rpl23	TRUE	FALSE	FALSE	FALSE	FALSE	FALSE	TRUE	FALSE	TRUE	FALSE	TRUE	FALSE	FALSE	FALSE
Ly6a	TRUE	FALSE	FALSE	TRUE	FALSE	FALSE	FALSE	FALSE	TRUE	FALSE	FALSE	TRUE	FALSE	FALSE
Crlf3	TRUE	FALSE	FALSE	FALSE	FALSE	FALSE	FALSE	FALSE	FALSE	FALSE	FALSE	FALSE	FALSE	FALSE
Rps3a1	TRUE	FALSE	FALSE	FALSE	FALSE	FALSE	FALSE	FALSE	FALSE	FALSE	FALSE	FALSE	FALSE	FALSE
Hacd4	TRUE	FALSE	FALSE	FALSE	FALSE	FALSE	FALSE	FALSE	TRUE	FALSE	FALSE	FALSE	FALSE	FALSE
Lst1	TRUE	FALSE	FALSE	FALSE	FALSE	FALSE	FALSE	FALSE	FALSE	FALSE	FALSE	FALSE	FALSE	FALSE
Rps23	TRUE	FALSE	FALSE	FALSE	FALSE	FALSE	FALSE	FALSE	FALSE	FALSE	FALSE	FALSE	FALSE	FALSE
Rps3	TRUE	FALSE	FALSE	FALSE	FALSE	FALSE	TRUE	FALSE	FALSE	FALSE	FALSE	FALSE	FALSE	FALSE
AC149090.1	TRUE	FALSE	FALSE	FALSE	FALSE	FALSE	TRUE	FALSE	FALSE	FALSE	FALSE	FALSE	FALSE	FALSE
Pik3r1	TRUE	FALSE	FALSE	FALSE	FALSE	FALSE	FALSE	FALSE	FALSE	FALSE	FALSE	FALSE	FALSE	FALSE
mt-Co3	TRUE	FALSE	FALSE	FALSE	TRUE	FALSE	FALSE	FALSE	FALSE	FALSE	TRUE	FALSE	FALSE	FALSE
H2-D1	TRUE	FALSE	FALSE	FALSE	FALSE	FALSE	FALSE	FALSE	FALSE	FALSE	FALSE	FALSE	FALSE	FALSE
Rpl11	TRUE	FALSE	FALSE	FALSE	FALSE	FALSE	TRUE	FALSE	FALSE	FALSE	FALSE	FALSE	FALSE	FALSE
Meg3	TRUE	FALSE	FALSE	FALSE	FALSE	FALSE	FALSE	FALSE	FALSE	FALSE	FALSE	FALSE	FALSE	FALSE
Rpl35a	TRUE	FALSE	FALSE	FALSE	TRUE	FALSE	FALSE	FALSE	FALSE	FALSE	FALSE	FALSE	FALSE	FALSE
Shisa5	TRUE	FALSE	FALSE	TRUE	FALSE	FALSE	FALSE	FALSE	TRUE	FALSE	FALSE	TRUE	FALSE	FALSE
Rabac1	TRUE	FALSE	FALSE	FALSE	FALSE	FALSE	FALSE	FALSE	FALSE	FALSE	FALSE	FALSE	FALSE	FALSE
Selenop	TRUE	FALSE	FALSE	FALSE	FALSE	FALSE	FALSE	FALSE	FALSE	FALSE	FALSE	FALSE	FALSE	FALSE
Gng11	TRUE	FALSE	FALSE	FALSE	FALSE	FALSE	FALSE	FALSE	TRUE	FALSE	FALSE	FALSE	FALSE	FALSE
mt-Co2	TRUE	FALSE	FALSE	FALSE	FALSE	FALSE	FALSE	FALSE	FALSE	FALSE	TRUE	FALSE	FALSE	FALSE
Cited2	TRUE	FALSE	FALSE	TRUE	FALSE	FALSE	FALSE	FALSE	FALSE	FALSE	FALSE	TRUE	TRUE	FALSE
B2m	TRUE	FALSE	FALSE	FALSE	FALSE	FALSE	FALSE	FALSE	TRUE	FALSE	FALSE	FALSE	FALSE	FALSE
Tmem176b	TRUE	FALSE	FALSE	FALSE	FALSE	FALSE	FALSE	FALSE	TRUE	FALSE	FALSE	FALSE	FALSE	FALSE
Rps20	TRUE	FALSE	FALSE	FALSE	FALSE	FALSE	FALSE	FALSE	FALSE	FALSE	FALSE	FALSE	FALSE	FALSE
Rpl10	TRUE	FALSE	FALSE	FALSE	FALSE	FALSE	TRUE	FALSE	TRUE	FALSE	FALSE	FALSE	FALSE	FALSE
Rps29	TRUE	FALSE	FALSE	FALSE	TRUE	FALSE	FALSE	FALSE	FALSE	FALSE	TRUE	FALSE	FALSE	FALSE
Rps12	TRUE	FALSE	FALSE	FALSE	TRUE	FALSE	FALSE	FALSE	FALSE	FALSE	FALSE	FALSE	FALSE	FALSE
H2-K1	TRUE	FALSE	FALSE	FALSE	FALSE	FALSE	FALSE	FALSE	TRUE	FALSE	FALSE	FALSE	FALSE	FALSE
Adgrg1	TRUE	FALSE	FALSE	FALSE	FALSE	FALSE	FALSE	FALSE	TRUE	FALSE	FALSE	FALSE	FALSE	FALSE
Gabarap	TRUE	FALSE	FALSE	FALSE	FALSE	FALSE	FALSE	FALSE	FALSE	FALSE	FALSE	FALSE	FALSE	FALSE
Tbxas1	TRUE	FALSE	FALSE	FALSE	FALSE	FALSE	FALSE	FALSE	TRUE	FALSE	FALSE	FALSE	FALSE	FALSE
Eif4a2	TRUE	FALSE	FALSE	FALSE	FALSE	FALSE	FALSE	FALSE	TRUE	FALSE	FALSE	FALSE	FALSE	FALSE
Cdkn1c	TRUE	FALSE	FALSE	FALSE	FALSE	FALSE	FALSE	FALSE	FALSE	FALSE	FALSE	FALSE	FALSE	FALSE
Limd2	TRUE	FALSE	FALSE	FALSE	FALSE	FALSE	FALSE	FALSE	FALSE	FALSE	FALSE	FALSE	FALSE	FALSE
Eif3f	TRUE	FALSE	FALSE	FALSE	FALSE	FALSE	TRUE	FALSE	FALSE	FALSE	FALSE	FALSE	FALSE	FALSE
Tmem59	TRUE	FALSE	FALSE	FALSE	FALSE	FALSE	FALSE	FALSE	FALSE	FALSE	FALSE	FALSE	FALSE	FALSE
Trim47	TRUE	FALSE	FALSE	FALSE	FALSE	FALSE	FALSE	FALSE	FALSE	FALSE	FALSE	FALSE	FALSE	FALSE
Rpl6	TRUE	FALSE	FALSE	FALSE	FALSE	FALSE	TRUE	FALSE	FALSE	FALSE	FALSE	FALSE	FALSE	FALSE
Pnisr	TRUE	FALSE	FALSE	FALSE	FALSE	FALSE	TRUE	FALSE	FALSE	FALSE	FALSE	FALSE	FALSE	FALSE
H2-T23	TRUE	FALSE	FALSE	FALSE	FALSE	FALSE	FALSE	FALSE	FALSE	FALSE	FALSE	FALSE	FALSE	FALSE
Prr13	TRUE	FALSE	FALSE	FALSE	FALSE	FALSE	FALSE	FALSE	FALSE	FALSE	FALSE	FALSE	FALSE	FALSE
Rbm5	TRUE	FALSE	FALSE	FALSE	FALSE	FALSE	FALSE	FALSE	FALSE	FALSE	FALSE	FALSE	FALSE	FALSE
Psap	TRUE	FALSE	FALSE	FALSE	FALSE	FALSE	FALSE	FALSE	FALSE	FALSE	FALSE	FALSE	FALSE	FALSE
Rpl34	TRUE	FALSE	FALSE	FALSE	TRUE	FALSE	TRUE	FALSE	FALSE	FALSE	FALSE	FALSE	FALSE	FALSE
Rps7	TRUE	FALSE	FALSE	FALSE	FALSE	FALSE	TRUE	FALSE	FALSE	FALSE	TRUE	FALSE	FALSE	FALSE
Glul	TRUE	FALSE	FALSE	FALSE	FALSE	FALSE	FALSE	FALSE	TRUE	FALSE	TRUE	FALSE	FALSE	FALSE
AI467606	TRUE	FALSE	FALSE	FALSE	FALSE	FALSE	FALSE	FALSE	FALSE	FALSE	FALSE	FALSE	FALSE	FALSE
Eef2	TRUE	FALSE	FALSE	FALSE	TRUE	FALSE	FALSE	FALSE	FALSE	FALSE	TRUE	FALSE	FALSE	FALSE
Zfp950	TRUE	FALSE	FALSE	FALSE	FALSE	FALSE	FALSE	FALSE	FALSE	FALSE	FALSE	FALSE	FALSE	FALSE
Gm42418	TRUE	FALSE	FALSE	FALSE	FALSE	FALSE	FALSE	FALSE	FALSE	FALSE	FALSE	FALSE	FALSE	FALSE
Cd81	TRUE	FALSE	FALSE	FALSE	FALSE	FALSE	FALSE	FALSE	FALSE	FALSE	FALSE	FALSE	FALSE	FALSE
Tmem176a	TRUE	FALSE	FALSE	FALSE	FALSE	FALSE	FALSE	FALSE	FALSE	FALSE	FALSE	FALSE	FALSE	FALSE
Rpl12	TRUE	FALSE	FALSE	FALSE	FALSE	FALSE	TRUE	FALSE	FALSE	FALSE	FALSE	FALSE	FALSE	FALSE
Ran	FALSE	TRUE	FALSE	FALSE	FALSE	TRUE	FALSE	TRUE	FALSE	FALSE	FALSE	FALSE	FALSE	FALSE
Eif5a	FALSE	TRUE	FALSE	FALSE	FALSE	FALSE	FALSE	FALSE	FALSE	FALSE	FALSE	FALSE	FALSE	FALSE
Mif	FALSE	TRUE	FALSE	FALSE	FALSE	FALSE	FALSE	TRUE	FALSE	FALSE	FALSE	FALSE	FALSE	FALSE
Ncl	FALSE	TRUE	FALSE	FALSE	FALSE	FALSE	FALSE	FALSE	FALSE	FALSE	FALSE	FALSE	FALSE	FALSE
Ppia	FALSE	TRUE	FALSE	FALSE	FALSE	TRUE	FALSE	TRUE	FALSE	FALSE	FALSE	FALSE	FALSE	FALSE
Nme1	FALSE	TRUE	FALSE	FALSE	FALSE	FALSE	FALSE	TRUE	FALSE	FALSE	FALSE	FALSE	FALSE	FALSE
Pfn1	FALSE	TRUE	FALSE	FALSE	FALSE	FALSE	FALSE	FALSE	FALSE	FALSE	FALSE	FALSE	FALSE	TRUE
Ptma	FALSE	TRUE	FALSE	FALSE	FALSE	TRUE	FALSE	TRUE	FALSE	FALSE	FALSE	FALSE	FALSE	FALSE
Anp32b	FALSE	TRUE	FALSE	FALSE	FALSE	TRUE	FALSE	TRUE	FALSE	FALSE	FALSE	FALSE	FALSE	FALSE
Slc25a5	FALSE	TRUE	FALSE	FALSE	FALSE	FALSE	FALSE	TRUE	FALSE	FALSE	FALSE	FALSE	FALSE	FALSE
Ranbp1	FALSE	TRUE	FALSE	FALSE	FALSE	FALSE	FALSE	TRUE	FALSE	FALSE	FALSE	FALSE	FALSE	FALSE
Hsp90aa1	FALSE	TRUE	FALSE	FALSE	FALSE	TRUE	FALSE	TRUE	FALSE	FALSE	FALSE	FALSE	FALSE	FALSE
Eif4a1	FALSE	TRUE	FALSE	FALSE	FALSE	FALSE	FALSE	FALSE	FALSE	FALSE	FALSE	FALSE	FALSE	FALSE
Srm	FALSE	TRUE	FALSE	FALSE	FALSE	FALSE	FALSE	FALSE	FALSE	FALSE	FALSE	FALSE	FALSE	FALSE
Set	FALSE	TRUE	FALSE	FALSE	FALSE	FALSE	FALSE	TRUE	FALSE	FALSE	FALSE	FALSE	FALSE	FALSE
Atp5g1	FALSE	TRUE	FALSE	FALSE	FALSE	FALSE	FALSE	FALSE	FALSE	FALSE	FALSE	FALSE	FALSE	FALSE
Hspd1	FALSE	TRUE	FALSE	FALSE	FALSE	FALSE	FALSE	TRUE	FALSE	FALSE	FALSE	FALSE	FALSE	FALSE
Ybx3	FALSE	TRUE	FALSE	FALSE	FALSE	FALSE	FALSE	TRUE	FALSE	FALSE	FALSE	FALSE	FALSE	FALSE
Hsp90ab1	FALSE	TRUE	FALSE	FALSE	FALSE	FALSE	FALSE	FALSE	FALSE	FALSE	FALSE	FALSE	FALSE	FALSE
Hspa8	FALSE	TRUE	FALSE	FALSE	FALSE	FALSE	FALSE	FALSE	FALSE	FALSE	FALSE	FALSE	FALSE	FALSE
Nop56	FALSE	TRUE	FALSE	FALSE	FALSE	FALSE	FALSE	FALSE	FALSE	FALSE	FALSE	FALSE	FALSE	FALSE
C1qbp	FALSE	TRUE	FALSE	FALSE	FALSE	FALSE	FALSE	FALSE	FALSE	FALSE	FALSE	FALSE	FALSE	FALSE
Pa2g4	FALSE	TRUE	FALSE	FALSE	FALSE	FALSE	FALSE	TRUE	FALSE	FALSE	FALSE	FALSE	FALSE	FALSE
Nop10	FALSE	TRUE	FALSE	FALSE	FALSE	FALSE	FALSE	FALSE	FALSE	FALSE	FALSE	FALSE	FALSE	FALSE
Npm1	FALSE	TRUE	FALSE	FALSE	FALSE	FALSE	FALSE	TRUE	FALSE	FALSE	FALSE	FALSE	FALSE	FALSE
Ybx1	FALSE	TRUE	FALSE	FALSE	FALSE	FALSE	FALSE	TRUE	FALSE	FALSE	FALSE	FALSE	FALSE	FALSE
Hspe1	FALSE	TRUE	FALSE	FALSE	FALSE	FALSE	FALSE	FALSE	FALSE	FALSE	FALSE	FALSE	FALSE	FALSE
Serbp1	FALSE	TRUE	FALSE	FALSE	FALSE	FALSE	FALSE	FALSE	FALSE	FALSE	FALSE	FALSE	FALSE	FALSE
Hnrnpf	FALSE	TRUE	FALSE	FALSE	FALSE	FALSE	FALSE	TRUE	FALSE	FALSE	FALSE	FALSE	FALSE	FALSE
Phgdh	FALSE	TRUE	FALSE	FALSE	FALSE	FALSE	FALSE	FALSE	FALSE	FALSE	FALSE	FALSE	FALSE	FALSE
Dctpp1	FALSE	TRUE	FALSE	FALSE	FALSE	FALSE	FALSE	TRUE	FALSE	FALSE	FALSE	FALSE	FALSE	FALSE
Cct3	FALSE	TRUE	FALSE	FALSE	FALSE	FALSE	FALSE	FALSE	FALSE	FALSE	FALSE	FALSE	FALSE	FALSE
Ppp1r14b	FALSE	TRUE	FALSE	FALSE	FALSE	FALSE	FALSE	FALSE	FALSE	FALSE	FALSE	FALSE	FALSE	FALSE
Fbl	FALSE	TRUE	FALSE	FALSE	FALSE	FALSE	FALSE	FALSE	FALSE	FALSE	FALSE	FALSE	FALSE	FALSE
Cfl1	FALSE	TRUE	FALSE	FALSE	FALSE	FALSE	FALSE	FALSE	FALSE	FALSE	FALSE	FALSE	FALSE	FALSE
Srsf2	FALSE	TRUE	FALSE	FALSE	FALSE	FALSE	FALSE	FALSE	FALSE	FALSE	FALSE	FALSE	FALSE	FALSE
Snrpd1	FALSE	TRUE	FALSE	FALSE	FALSE	TRUE	FALSE	TRUE	FALSE	FALSE	FALSE	FALSE	FALSE	FALSE
Actb	FALSE	TRUE	FALSE	FALSE	FALSE	FALSE	FALSE	FALSE	FALSE	FALSE	FALSE	FALSE	FALSE	FALSE
Cdca7	FALSE	TRUE	FALSE	FALSE	FALSE	FALSE	FALSE	TRUE	FALSE	FALSE	FALSE	FALSE	FALSE	FALSE
Cox5a	FALSE	TRUE	FALSE	FALSE	FALSE	FALSE	FALSE	TRUE	FALSE	FALSE	FALSE	FALSE	FALSE	FALSE
Tuba1b	FALSE	TRUE	FALSE	FALSE	FALSE	TRUE	FALSE	TRUE	FALSE	TRUE	FALSE	FALSE	FALSE	FALSE
Nhp2	FALSE	TRUE	FALSE	FALSE	FALSE	FALSE	FALSE	FALSE	FALSE	FALSE	FALSE	FALSE	FALSE	FALSE
Nop58	FALSE	TRUE	FALSE	FALSE	FALSE	FALSE	FALSE	FALSE	FALSE	FALSE	FALSE	FALSE	FALSE	FALSE
G3bp1	FALSE	TRUE	FALSE	FALSE	FALSE	FALSE	FALSE	FALSE	FALSE	FALSE	FALSE	FALSE	FALSE	FALSE
Prdx1	FALSE	TRUE	FALSE	FALSE	FALSE	FALSE	FALSE	TRUE	FALSE	FALSE	FALSE	FALSE	FALSE	FALSE
Dkc1	FALSE	TRUE	FALSE	FALSE	FALSE	FALSE	FALSE	FALSE	FALSE	FALSE	FALSE	FALSE	FALSE	FALSE
Cdk4	FALSE	TRUE	FALSE	FALSE	FALSE	FALSE	FALSE	TRUE	FALSE	FALSE	FALSE	FALSE	FALSE	FALSE
Cct8	FALSE	TRUE	FALSE	FALSE	FALSE	FALSE	FALSE	FALSE	FALSE	FALSE	FALSE	FALSE	FALSE	FALSE
Banf1	FALSE	TRUE	FALSE	FALSE	FALSE	FALSE	FALSE	FALSE	FALSE	FALSE	FALSE	FALSE	FALSE	FALSE
Aprt	FALSE	TRUE	FALSE	FALSE	FALSE	FALSE	FALSE	FALSE	FALSE	FALSE	FALSE	FALSE	FALSE	FALSE
Ldha	FALSE	TRUE	FALSE	FALSE	FALSE	FALSE	FALSE	FALSE	FALSE	FALSE	FALSE	FALSE	FALSE	FALSE
Bzw2	FALSE	TRUE	FALSE	FALSE	FALSE	FALSE	FALSE	FALSE	FALSE	FALSE	FALSE	FALSE	FALSE	FALSE
H2afz	FALSE	TRUE	FALSE	FALSE	FALSE	TRUE	FALSE	TRUE	FALSE	TRUE	FALSE	FALSE	FALSE	FALSE
Prmt1	FALSE	TRUE	FALSE	FALSE	FALSE	FALSE	FALSE	FALSE	FALSE	FALSE	FALSE	FALSE	FALSE	FALSE
Ppa1	FALSE	TRUE	FALSE	TRUE	FALSE	FALSE	FALSE	FALSE	FALSE	FALSE	FALSE	TRUE	FALSE	FALSE
Apex1	FALSE	TRUE	FALSE	FALSE	FALSE	FALSE	FALSE	FALSE	FALSE	FALSE	FALSE	FALSE	FALSE	FALSE
Cnbp	FALSE	TRUE	FALSE	FALSE	FALSE	FALSE	FALSE	FALSE	FALSE	FALSE	FALSE	FALSE	FALSE	FALSE
Mcm6	FALSE	TRUE	FALSE	FALSE	FALSE	FALSE	FALSE	TRUE	FALSE	FALSE	FALSE	FALSE	FALSE	FALSE
Psma7	FALSE	TRUE	FALSE	FALSE	FALSE	FALSE	FALSE	FALSE	FALSE	FALSE	FALSE	FALSE	FALSE	FALSE
Mrpl12	FALSE	TRUE	FALSE	FALSE	FALSE	FALSE	FALSE	FALSE	FALSE	FALSE	FALSE	FALSE	FALSE	FALSE
Atp5b	FALSE	TRUE	FALSE	FALSE	FALSE	FALSE	FALSE	FALSE	FALSE	FALSE	FALSE	FALSE	FALSE	FALSE
Mcm3	FALSE	TRUE	FALSE	FALSE	FALSE	TRUE	FALSE	TRUE	FALSE	FALSE	FALSE	FALSE	FALSE	FALSE
Snrpd3	FALSE	TRUE	FALSE	FALSE	FALSE	FALSE	FALSE	FALSE	FALSE	FALSE	FALSE	FALSE	FALSE	FALSE
Sumo2	FALSE	TRUE	FALSE	FALSE	FALSE	FALSE	FALSE	TRUE	FALSE	FALSE	FALSE	FALSE	FALSE	FALSE
Nolc1	FALSE	TRUE	FALSE	FALSE	FALSE	FALSE	FALSE	FALSE	FALSE	FALSE	FALSE	FALSE	FALSE	FALSE
Snrpb	FALSE	TRUE	FALSE	FALSE	FALSE	FALSE	FALSE	FALSE	FALSE	FALSE	FALSE	FALSE	FALSE	FALSE
Rps27l	FALSE	TRUE	FALSE	FALSE	FALSE	FALSE	FALSE	FALSE	FALSE	FALSE	FALSE	FALSE	FALSE	FALSE
Rpsa	FALSE	TRUE	FALSE	FALSE	FALSE	FALSE	TRUE	FALSE	FALSE	FALSE	FALSE	FALSE	FALSE	FALSE
Tkt	FALSE	TRUE	FALSE	FALSE	FALSE	FALSE	FALSE	FALSE	FALSE	FALSE	FALSE	FALSE	FALSE	FALSE
Pebp1	FALSE	TRUE	FALSE	FALSE	FALSE	FALSE	FALSE	FALSE	FALSE	FALSE	FALSE	FALSE	FALSE	FALSE
Eef1g	FALSE	TRUE	FALSE	FALSE	FALSE	FALSE	FALSE	FALSE	FALSE	FALSE	FALSE	FALSE	FALSE	FALSE
Dut	FALSE	TRUE	FALSE	FALSE	FALSE	TRUE	FALSE	TRUE	FALSE	FALSE	FALSE	FALSE	FALSE	FALSE
Rbm3	FALSE	TRUE	FALSE	FALSE	FALSE	TRUE	FALSE	FALSE	FALSE	FALSE	FALSE	FALSE	FALSE	FALSE
Hnrnpab	FALSE	TRUE	FALSE	FALSE	FALSE	FALSE	FALSE	TRUE	FALSE	FALSE	FALSE	FALSE	FALSE	FALSE
Pcbp1	FALSE	TRUE	FALSE	FALSE	FALSE	FALSE	FALSE	FALSE	FALSE	FALSE	FALSE	FALSE	FALSE	FALSE
Fkbp4	FALSE	TRUE	FALSE	FALSE	FALSE	FALSE	FALSE	FALSE	FALSE	FALSE	FALSE	FALSE	FALSE	FALSE
Mat2a	FALSE	TRUE	FALSE	FALSE	FALSE	FALSE	FALSE	FALSE	FALSE	FALSE	FALSE	FALSE	FALSE	FALSE
Dnph1	FALSE	TRUE	FALSE	FALSE	FALSE	FALSE	FALSE	FALSE	FALSE	FALSE	FALSE	FALSE	FALSE	FALSE
Gar1	FALSE	TRUE	FALSE	FALSE	FALSE	FALSE	FALSE	FALSE	FALSE	FALSE	FALSE	FALSE	FALSE	FALSE
Calr	FALSE	TRUE	FALSE	FALSE	FALSE	FALSE	FALSE	FALSE	FALSE	FALSE	FALSE	FALSE	FALSE	TRUE
Park7	FALSE	TRUE	FALSE	FALSE	FALSE	FALSE	FALSE	FALSE	FALSE	FALSE	FALSE	FALSE	FALSE	FALSE
Psmb5	FALSE	TRUE	FALSE	FALSE	FALSE	FALSE	FALSE	FALSE	FALSE	FALSE	FALSE	FALSE	FALSE	FALSE
Gapdh	FALSE	TRUE	FALSE	FALSE	FALSE	FALSE	FALSE	TRUE	FALSE	FALSE	FALSE	FALSE	FALSE	FALSE
Sec61b	FALSE	TRUE	FALSE	FALSE	FALSE	FALSE	FALSE	FALSE	FALSE	FALSE	FALSE	FALSE	FALSE	TRUE
Hnrnpu	FALSE	TRUE	FALSE	FALSE	FALSE	FALSE	FALSE	FALSE	FALSE	FALSE	FALSE	FALSE	FALSE	FALSE
Snrpd2	FALSE	TRUE	FALSE	FALSE	FALSE	FALSE	FALSE	FALSE	FALSE	FALSE	FALSE	FALSE	FALSE	FALSE
Txn1	FALSE	TRUE	FALSE	FALSE	FALSE	TRUE	FALSE	FALSE	FALSE	FALSE	FALSE	FALSE	FALSE	FALSE
Rps8	FALSE	TRUE	FALSE	FALSE	FALSE	FALSE	FALSE	FALSE	FALSE	FALSE	FALSE	FALSE	FALSE	FALSE
Eif3a	FALSE	TRUE	FALSE	FALSE	FALSE	FALSE	FALSE	FALSE	FALSE	FALSE	FALSE	FALSE	FALSE	FALSE
Gnl3	FALSE	TRUE	FALSE	FALSE	FALSE	FALSE	FALSE	FALSE	FALSE	FALSE	FALSE	FALSE	FALSE	FALSE
Atp5e	FALSE	TRUE	FALSE	FALSE	FALSE	FALSE	FALSE	FALSE	FALSE	FALSE	FALSE	FALSE	FALSE	FALSE
U2af1	FALSE	TRUE	FALSE	FALSE	FALSE	FALSE	FALSE	FALSE	FALSE	FALSE	FALSE	FALSE	FALSE	FALSE
Hdgf	FALSE	TRUE	FALSE	FALSE	FALSE	FALSE	FALSE	FALSE	FALSE	FALSE	FALSE	FALSE	FALSE	FALSE
Timm8a1	FALSE	TRUE	FALSE	FALSE	FALSE	FALSE	FALSE	TRUE	FALSE	FALSE	FALSE	FALSE	FALSE	FALSE
Nap1l1	FALSE	TRUE	FALSE	FALSE	FALSE	TRUE	FALSE	TRUE	FALSE	FALSE	FALSE	FALSE	FALSE	FALSE
Rsl1d1	FALSE	TRUE	FALSE	FALSE	FALSE	FALSE	FALSE	FALSE	FALSE	FALSE	FALSE	FALSE	FALSE	FALSE
Tuba4a	FALSE	TRUE	FALSE	FALSE	FALSE	FALSE	FALSE	TRUE	FALSE	FALSE	FALSE	FALSE	FALSE	FALSE
Nsun2	FALSE	TRUE	FALSE	FALSE	FALSE	FALSE	FALSE	FALSE	FALSE	FALSE	FALSE	FALSE	FALSE	FALSE
Noc2l	FALSE	TRUE	FALSE	FALSE	FALSE	FALSE	FALSE	FALSE	FALSE	FALSE	FALSE	FALSE	FALSE	FALSE
Srsf3	FALSE	TRUE	FALSE	FALSE	FALSE	TRUE	FALSE	FALSE	FALSE	FALSE	FALSE	FALSE	FALSE	FALSE
Nr4a1	FALSE	FALSE	TRUE	FALSE	FALSE	FALSE	FALSE	FALSE	TRUE	FALSE	FALSE	FALSE	FALSE	FALSE
Hes1	FALSE	FALSE	TRUE	FALSE	FALSE	FALSE	FALSE	FALSE	FALSE	FALSE	FALSE	FALSE	FALSE	FALSE
H3f3b	FALSE	FALSE	TRUE	FALSE	FALSE	FALSE	FALSE	FALSE	TRUE	FALSE	TRUE	FALSE	FALSE	FALSE
Ier2	FALSE	FALSE	TRUE	FALSE	FALSE	FALSE	FALSE	FALSE	TRUE	FALSE	TRUE	FALSE	FALSE	FALSE
Junb	FALSE	FALSE	TRUE	FALSE	FALSE	FALSE	FALSE	FALSE	TRUE	FALSE	FALSE	TRUE	TRUE	FALSE
Klf2	FALSE	FALSE	TRUE	FALSE	FALSE	FALSE	FALSE	FALSE	TRUE	FALSE	FALSE	FALSE	FALSE	FALSE
Fos	FALSE	FALSE	TRUE	FALSE	FALSE	FALSE	FALSE	FALSE	TRUE	FALSE	FALSE	FALSE	FALSE	FALSE
Smad7	FALSE	FALSE	TRUE	FALSE	FALSE	FALSE	FALSE	FALSE	TRUE	FALSE	FALSE	FALSE	FALSE	FALSE
Nr4a2	FALSE	FALSE	TRUE	FALSE	FALSE	FALSE	FALSE	FALSE	FALSE	FALSE	FALSE	FALSE	FALSE	FALSE
Rgs2	FALSE	FALSE	TRUE	FALSE	FALSE	FALSE	FALSE	FALSE	TRUE	FALSE	FALSE	FALSE	FALSE	FALSE
Zfp36	FALSE	FALSE	TRUE	FALSE	FALSE	FALSE	FALSE	FALSE	TRUE	FALSE	FALSE	FALSE	FALSE	FALSE
Skil	FALSE	FALSE	TRUE	FALSE	FALSE	FALSE	FALSE	FALSE	FALSE	FALSE	FALSE	FALSE	FALSE	FALSE
Ier3	FALSE	FALSE	TRUE	FALSE	FALSE	FALSE	FALSE	FALSE	FALSE	FALSE	FALSE	FALSE	FALSE	FALSE
Pnrc1	FALSE	FALSE	TRUE	FALSE	FALSE	FALSE	FALSE	FALSE	TRUE	FALSE	FALSE	FALSE	FALSE	FALSE
Ubc	FALSE	FALSE	TRUE	FALSE	FALSE	FALSE	FALSE	FALSE	FALSE	FALSE	TRUE	FALSE	FALSE	FALSE
Mcl1	FALSE	FALSE	TRUE	FALSE	FALSE	FALSE	FALSE	FALSE	TRUE	FALSE	TRUE	FALSE	FALSE	FALSE
Ppp1r15a	FALSE	FALSE	TRUE	FALSE	FALSE	FALSE	FALSE	FALSE	TRUE	FALSE	FALSE	FALSE	FALSE	FALSE
Ccnt1	FALSE	FALSE	TRUE	FALSE	FALSE	FALSE	FALSE	FALSE	FALSE	FALSE	FALSE	FALSE	FALSE	FALSE
Dusp1	FALSE	FALSE	TRUE	FALSE	FALSE	FALSE	FALSE	FALSE	TRUE	FALSE	FALSE	FALSE	FALSE	FALSE
Isca1	FALSE	FALSE	TRUE	FALSE	FALSE	FALSE	FALSE	FALSE	FALSE	FALSE	FALSE	FALSE	FALSE	FALSE
Btg2	FALSE	FALSE	TRUE	FALSE	FALSE	FALSE	FALSE	FALSE	FALSE	FALSE	FALSE	FALSE	FALSE	FALSE
Ddx5	FALSE	FALSE	TRUE	FALSE	FALSE	FALSE	FALSE	FALSE	TRUE	FALSE	FALSE	FALSE	FALSE	FALSE
Egr1	FALSE	FALSE	TRUE	FALSE	FALSE	FALSE	FALSE	FALSE	TRUE	FALSE	FALSE	FALSE	FALSE	FALSE
Ccnl1	FALSE	FALSE	TRUE	FALSE	FALSE	FALSE	FALSE	FALSE	FALSE	FALSE	FALSE	FALSE	FALSE	FALSE
Klf9	FALSE	FALSE	TRUE	FALSE	TRUE	FALSE	FALSE	FALSE	FALSE	FALSE	TRUE	FALSE	FALSE	FALSE
Klf4	FALSE	FALSE	TRUE	FALSE	FALSE	FALSE	FALSE	FALSE	FALSE	FALSE	FALSE	FALSE	FALSE	FALSE
Cdk11b	FALSE	FALSE	TRUE	FALSE	FALSE	FALSE	FALSE	FALSE	FALSE	FALSE	FALSE	FALSE	FALSE	FALSE
Klf6	FALSE	FALSE	TRUE	FALSE	FALSE	FALSE	FALSE	FALSE	TRUE	FALSE	FALSE	FALSE	FALSE	FALSE
Srsf5	FALSE	FALSE	TRUE	FALSE	TRUE	FALSE	FALSE	FALSE	TRUE	FALSE	TRUE	FALSE	FALSE	FALSE
Tsc22d2	FALSE	FALSE	TRUE	FALSE	FALSE	FALSE	FALSE	FALSE	FALSE	FALSE	FALSE	FALSE	FALSE	FALSE
Cebpb	FALSE	FALSE	TRUE	FALSE	TRUE	FALSE	FALSE	FALSE	FALSE	FALSE	TRUE	FALSE	FALSE	FALSE
Rlim	FALSE	FALSE	TRUE	FALSE	FALSE	FALSE	FALSE	FALSE	FALSE	FALSE	FALSE	FALSE	FALSE	FALSE
Clk1	FALSE	FALSE	TRUE	FALSE	FALSE	FALSE	FALSE	FALSE	TRUE	FALSE	TRUE	FALSE	FALSE	FALSE
Tsc22d1	FALSE	FALSE	TRUE	FALSE	TRUE	FALSE	FALSE	FALSE	TRUE	FALSE	TRUE	FALSE	FALSE	FALSE
Fam110a	FALSE	FALSE	TRUE	FALSE	FALSE	FALSE	FALSE	FALSE	FALSE	FALSE	FALSE	FALSE	FALSE	FALSE
Coq10b	FALSE	FALSE	TRUE	FALSE	FALSE	FALSE	FALSE	FALSE	FALSE	FALSE	FALSE	FALSE	FALSE	FALSE
Jund	FALSE	FALSE	TRUE	FALSE	FALSE	FALSE	FALSE	FALSE	TRUE	FALSE	FALSE	FALSE	FALSE	FALSE
Eif1	FALSE	FALSE	TRUE	FALSE	TRUE	FALSE	FALSE	FALSE	FALSE	FALSE	FALSE	FALSE	FALSE	FALSE
Dnajb1	FALSE	FALSE	TRUE	FALSE	FALSE	FALSE	FALSE	FALSE	FALSE	FALSE	FALSE	FALSE	FALSE	FALSE
D8Ertd738e	FALSE	FALSE	TRUE	FALSE	FALSE	FALSE	FALSE	FALSE	FALSE	FALSE	FALSE	FALSE	FALSE	FALSE
Gm26532	FALSE	FALSE	TRUE	FALSE	FALSE	FALSE	FALSE	FALSE	FALSE	FALSE	FALSE	FALSE	FALSE	FALSE
Sik1	FALSE	FALSE	TRUE	FALSE	FALSE	FALSE	FALSE	FALSE	FALSE	FALSE	TRUE	FALSE	FALSE	FALSE
Dennd4a	FALSE	FALSE	TRUE	FALSE	TRUE	FALSE	FALSE	FALSE	FALSE	FALSE	TRUE	FALSE	FALSE	FALSE
Dusp2	FALSE	FALSE	TRUE	FALSE	TRUE	FALSE	FALSE	FALSE	FALSE	FALSE	FALSE	FALSE	FALSE	FALSE
Wwc2	FALSE	FALSE	TRUE	FALSE	FALSE	FALSE	FALSE	FALSE	FALSE	FALSE	FALSE	FALSE	FALSE	FALSE
Jun	FALSE	FALSE	TRUE	FALSE	FALSE	FALSE	FALSE	FALSE	TRUE	FALSE	FALSE	FALSE	FALSE	FALSE
Sfr1	FALSE	FALSE	TRUE	FALSE	FALSE	FALSE	FALSE	FALSE	FALSE	FALSE	FALSE	FALSE	FALSE	FALSE
Rgs1	FALSE	FALSE	TRUE	FALSE	FALSE	FALSE	FALSE	FALSE	TRUE	FALSE	FALSE	FALSE	FALSE	FALSE
Rhob	FALSE	FALSE	TRUE	FALSE	FALSE	FALSE	FALSE	FALSE	TRUE	FALSE	FALSE	FALSE	FALSE	FALSE
Id1	FALSE	FALSE	TRUE	FALSE	FALSE	FALSE	FALSE	FALSE	FALSE	FALSE	FALSE	FALSE	FALSE	FALSE
Snrpc	FALSE	FALSE	TRUE	FALSE	FALSE	FALSE	FALSE	FALSE	FALSE	FALSE	FALSE	FALSE	FALSE	FALSE
Zcchc6	FALSE	FALSE	TRUE	FALSE	FALSE	FALSE	FALSE	FALSE	FALSE	FALSE	FALSE	FALSE	FALSE	FALSE
Elf1	FALSE	FALSE	TRUE	FALSE	FALSE	FALSE	FALSE	FALSE	FALSE	FALSE	FALSE	FALSE	FALSE	FALSE
Dnajb9	FALSE	FALSE	TRUE	FALSE	FALSE	FALSE	FALSE	FALSE	FALSE	FALSE	FALSE	FALSE	FALSE	FALSE
Stk17b	FALSE	FALSE	TRUE	FALSE	TRUE	FALSE	FALSE	FALSE	FALSE	FALSE	TRUE	FALSE	FALSE	FALSE
Maff	FALSE	FALSE	TRUE	FALSE	FALSE	FALSE	FALSE	FALSE	FALSE	FALSE	FALSE	FALSE	FALSE	FALSE
Neat1	FALSE	FALSE	TRUE	FALSE	FALSE	FALSE	FALSE	FALSE	TRUE	FALSE	FALSE	FALSE	FALSE	TRUE
Cdkn1a	FALSE	FALSE	TRUE	FALSE	TRUE	FALSE	FALSE	FALSE	FALSE	FALSE	TRUE	FALSE	FALSE	FALSE
Btg1	FALSE	FALSE	TRUE	FALSE	FALSE	FALSE	FALSE	FALSE	TRUE	FALSE	FALSE	FALSE	FALSE	FALSE
Klhl24	FALSE	FALSE	TRUE	FALSE	FALSE	FALSE	FALSE	FALSE	FALSE	FALSE	FALSE	FALSE	FALSE	FALSE
Tiparp	FALSE	FALSE	TRUE	FALSE	FALSE	FALSE	FALSE	FALSE	FALSE	FALSE	FALSE	FALSE	FALSE	FALSE
Neurl3	FALSE	FALSE	TRUE	FALSE	TRUE	FALSE	FALSE	FALSE	FALSE	FALSE	TRUE	FALSE	FALSE	FALSE
Ranbp2	FALSE	FALSE	TRUE	FALSE	FALSE	FALSE	FALSE	FALSE	FALSE	FALSE	FALSE	FALSE	FALSE	FALSE
Rbm39	FALSE	FALSE	TRUE	FALSE	FALSE	FALSE	FALSE	FALSE	TRUE	FALSE	FALSE	FALSE	FALSE	FALSE
Dusp5	FALSE	FALSE	TRUE	FALSE	FALSE	FALSE	FALSE	FALSE	FALSE	FALSE	FALSE	FALSE	FALSE	FALSE
Avl9	FALSE	FALSE	TRUE	FALSE	FALSE	FALSE	FALSE	FALSE	FALSE	FALSE	FALSE	FALSE	FALSE	FALSE
Ctla2a	FALSE	FALSE	TRUE	FALSE	TRUE	FALSE	FALSE	FALSE	FALSE	FALSE	TRUE	FALSE	FALSE	FALSE
Socs3	FALSE	FALSE	TRUE	FALSE	FALSE	FALSE	FALSE	FALSE	FALSE	FALSE	FALSE	TRUE	FALSE	FALSE
Klf13	FALSE	FALSE	TRUE	FALSE	TRUE	FALSE	FALSE	FALSE	FALSE	FALSE	TRUE	FALSE	FALSE	FALSE
Ing2	FALSE	FALSE	TRUE	FALSE	FALSE	FALSE	FALSE	FALSE	FALSE	FALSE	FALSE	FALSE	FALSE	FALSE
Ddx50	FALSE	FALSE	TRUE	FALSE	FALSE	FALSE	FALSE	FALSE	FALSE	FALSE	FALSE	FALSE	FALSE	FALSE
Yrdc	FALSE	FALSE	TRUE	FALSE	FALSE	FALSE	FALSE	FALSE	FALSE	FALSE	FALSE	FALSE	FALSE	FALSE
Tra2b	FALSE	FALSE	TRUE	FALSE	FALSE	FALSE	FALSE	FALSE	FALSE	FALSE	FALSE	FALSE	FALSE	FALSE
Slc38a1	FALSE	FALSE	TRUE	FALSE	FALSE	FALSE	FALSE	FALSE	FALSE	FALSE	TRUE	FALSE	FALSE	FALSE
Cenpa	FALSE	FALSE	TRUE	FALSE	FALSE	FALSE	FALSE	FALSE	FALSE	TRUE	FALSE	FALSE	FALSE	FALSE
Ier5	FALSE	FALSE	TRUE	FALSE	FALSE	FALSE	FALSE	FALSE	FALSE	FALSE	FALSE	FALSE	FALSE	FALSE
Nkx2-3	FALSE	FALSE	TRUE	FALSE	FALSE	FALSE	FALSE	FALSE	TRUE	FALSE	FALSE	FALSE	FALSE	FALSE
2810403A07Rik	FALSE	FALSE	TRUE	FALSE	FALSE	FALSE	FALSE	FALSE	FALSE	FALSE	FALSE	FALSE	FALSE	FALSE
Per1	FALSE	FALSE	TRUE	FALSE	TRUE	FALSE	FALSE	FALSE	FALSE	FALSE	TRUE	FALSE	FALSE	FALSE
Tra2a	FALSE	FALSE	TRUE	FALSE	FALSE	FALSE	FALSE	FALSE	FALSE	FALSE	FALSE	FALSE	FALSE	FALSE
Fosb	FALSE	FALSE	TRUE	FALSE	FALSE	FALSE	FALSE	FALSE	TRUE	FALSE	FALSE	FALSE	FALSE	FALSE
Myct1	FALSE	FALSE	TRUE	FALSE	FALSE	FALSE	FALSE	FALSE	FALSE	FALSE	TRUE	FALSE	FALSE	FALSE
Selenok	FALSE	FALSE	TRUE	FALSE	FALSE	FALSE	FALSE	FALSE	FALSE	FALSE	FALSE	FALSE	FALSE	FALSE
Rnf4	FALSE	FALSE	TRUE	FALSE	FALSE	FALSE	FALSE	FALSE	FALSE	FALSE	FALSE	FALSE	FALSE	FALSE
Luc7l2	FALSE	FALSE	TRUE	FALSE	FALSE	FALSE	FALSE	FALSE	FALSE	FALSE	FALSE	FALSE	FALSE	FALSE
Purb	FALSE	FALSE	TRUE	FALSE	FALSE	FALSE	FALSE	FALSE	FALSE	FALSE	FALSE	FALSE	FALSE	FALSE
Snu13	FALSE	FALSE	TRUE	FALSE	FALSE	FALSE	FALSE	FALSE	FALSE	FALSE	FALSE	FALSE	FALSE	FALSE
Frat2	FALSE	FALSE	TRUE	FALSE	FALSE	FALSE	FALSE	FALSE	FALSE	FALSE	FALSE	FALSE	FALSE	FALSE
Fosl2	FALSE	FALSE	TRUE	FALSE	TRUE	FALSE	FALSE	FALSE	FALSE	FALSE	TRUE	FALSE	FALSE	FALSE
Ncf2	FALSE	FALSE	TRUE	FALSE	FALSE	FALSE	FALSE	FALSE	FALSE	FALSE	FALSE	FALSE	FALSE	FALSE
Vamp3	FALSE	FALSE	TRUE	FALSE	FALSE	FALSE	FALSE	FALSE	FALSE	FALSE	FALSE	FALSE	FALSE	FALSE
Aff4	FALSE	FALSE	TRUE	FALSE	FALSE	FALSE	FALSE	FALSE	FALSE	FALSE	FALSE	FALSE	FALSE	FALSE
Ptp4a1	FALSE	FALSE	TRUE	FALSE	FALSE	FALSE	FALSE	FALSE	FALSE	FALSE	FALSE	FALSE	FALSE	FALSE
Hspa5	FALSE	FALSE	TRUE	FALSE	FALSE	FALSE	FALSE	FALSE	FALSE	FALSE	FALSE	FALSE	FALSE	TRUE
Tgoln1	FALSE	FALSE	TRUE	FALSE	FALSE	FALSE	FALSE	FALSE	FALSE	FALSE	FALSE	FALSE	FALSE	FALSE
Zc3h12a	FALSE	FALSE	TRUE	FALSE	FALSE	FALSE	FALSE	FALSE	FALSE	FALSE	FALSE	FALSE	FALSE	FALSE
Iigp1	FALSE	FALSE	FALSE	TRUE	FALSE	FALSE	FALSE	FALSE	FALSE	FALSE	FALSE	TRUE	TRUE	FALSE
Isg15	FALSE	FALSE	FALSE	TRUE	FALSE	FALSE	FALSE	FALSE	FALSE	FALSE	FALSE	TRUE	TRUE	FALSE
Ifit1	FALSE	FALSE	FALSE	TRUE	FALSE	FALSE	FALSE	FALSE	FALSE	FALSE	FALSE	TRUE	TRUE	FALSE
Gbp7	FALSE	FALSE	FALSE	TRUE	FALSE	FALSE	FALSE	FALSE	FALSE	FALSE	FALSE	TRUE	TRUE	FALSE
Oasl2	FALSE	FALSE	FALSE	TRUE	FALSE	FALSE	FALSE	FALSE	FALSE	FALSE	FALSE	TRUE	TRUE	FALSE
Gm4951	FALSE	FALSE	FALSE	TRUE	FALSE	FALSE	FALSE	FALSE	FALSE	FALSE	FALSE	TRUE	TRUE	FALSE
Ifitm3	FALSE	FALSE	FALSE	TRUE	FALSE	FALSE	FALSE	FALSE	TRUE	FALSE	FALSE	TRUE	TRUE	FALSE
Rtp4	FALSE	FALSE	FALSE	TRUE	FALSE	FALSE	FALSE	FALSE	FALSE	FALSE	FALSE	TRUE	TRUE	FALSE
Igtp	FALSE	FALSE	FALSE	TRUE	FALSE	FALSE	FALSE	FALSE	FALSE	FALSE	FALSE	TRUE	TRUE	FALSE
Ifi203	FALSE	FALSE	FALSE	TRUE	FALSE	FALSE	FALSE	FALSE	FALSE	FALSE	FALSE	TRUE	TRUE	FALSE
Serpina3g	FALSE	FALSE	FALSE	TRUE	FALSE	FALSE	FALSE	FALSE	FALSE	FALSE	FALSE	TRUE	TRUE	FALSE
Ifi47	FALSE	FALSE	FALSE	TRUE	FALSE	FALSE	FALSE	FALSE	FALSE	FALSE	FALSE	TRUE	TRUE	FALSE
Rsad2	FALSE	FALSE	FALSE	TRUE	FALSE	FALSE	FALSE	FALSE	FALSE	FALSE	FALSE	TRUE	TRUE	FALSE
Irgm1	FALSE	FALSE	FALSE	TRUE	FALSE	FALSE	FALSE	FALSE	FALSE	FALSE	FALSE	TRUE	TRUE	FALSE
Irf7	FALSE	FALSE	FALSE	TRUE	FALSE	FALSE	FALSE	FALSE	FALSE	FALSE	FALSE	TRUE	TRUE	FALSE
Slfn5	FALSE	FALSE	FALSE	TRUE	FALSE	FALSE	FALSE	FALSE	FALSE	FALSE	FALSE	TRUE	FALSE	FALSE
Ifi44	FALSE	FALSE	FALSE	TRUE	FALSE	FALSE	FALSE	FALSE	FALSE	FALSE	FALSE	TRUE	TRUE	FALSE
Herc6	FALSE	FALSE	FALSE	TRUE	FALSE	FALSE	FALSE	FALSE	FALSE	FALSE	FALSE	TRUE	TRUE	FALSE
Ifit3	FALSE	FALSE	FALSE	TRUE	FALSE	FALSE	FALSE	FALSE	FALSE	FALSE	FALSE	TRUE	TRUE	FALSE
Parp14	FALSE	FALSE	FALSE	TRUE	FALSE	FALSE	FALSE	FALSE	FALSE	FALSE	FALSE	TRUE	TRUE	FALSE
Xaf1	FALSE	FALSE	FALSE	TRUE	FALSE	FALSE	FALSE	FALSE	FALSE	FALSE	FALSE	TRUE	TRUE	FALSE
Mndal	FALSE	FALSE	FALSE	TRUE	FALSE	FALSE	FALSE	FALSE	FALSE	FALSE	FALSE	TRUE	TRUE	FALSE
Gbp5	FALSE	FALSE	FALSE	TRUE	FALSE	FALSE	FALSE	FALSE	FALSE	FALSE	FALSE	TRUE	TRUE	FALSE
Ifit2	FALSE	FALSE	FALSE	TRUE	FALSE	FALSE	FALSE	FALSE	FALSE	FALSE	FALSE	TRUE	TRUE	FALSE
Usp18	FALSE	FALSE	FALSE	TRUE	FALSE	FALSE	FALSE	FALSE	FALSE	FALSE	FALSE	TRUE	TRUE	FALSE
Cmpk2	FALSE	FALSE	FALSE	TRUE	FALSE	FALSE	FALSE	FALSE	FALSE	FALSE	FALSE	TRUE	TRUE	FALSE
Isg20	FALSE	FALSE	FALSE	TRUE	FALSE	FALSE	FALSE	FALSE	FALSE	FALSE	FALSE	TRUE	TRUE	FALSE
Mx1	FALSE	FALSE	FALSE	TRUE	FALSE	FALSE	FALSE	FALSE	FALSE	FALSE	FALSE	TRUE	TRUE	FALSE
Cxcl10	FALSE	FALSE	FALSE	TRUE	FALSE	FALSE	FALSE	FALSE	FALSE	FALSE	FALSE	TRUE	TRUE	FALSE
Serpina3f	FALSE	FALSE	FALSE	TRUE	FALSE	FALSE	FALSE	FALSE	FALSE	FALSE	FALSE	TRUE	TRUE	FALSE
Irf1	FALSE	FALSE	FALSE	TRUE	FALSE	FALSE	FALSE	FALSE	FALSE	FALSE	FALSE	TRUE	TRUE	FALSE
Gbp2	FALSE	FALSE	FALSE	TRUE	FALSE	FALSE	FALSE	FALSE	FALSE	FALSE	FALSE	TRUE	FALSE	FALSE
Trim30a	FALSE	FALSE	FALSE	TRUE	FALSE	FALSE	FALSE	FALSE	FALSE	FALSE	FALSE	TRUE	TRUE	FALSE
Slfn8	FALSE	FALSE	FALSE	TRUE	FALSE	FALSE	FALSE	FALSE	FALSE	FALSE	FALSE	TRUE	TRUE	FALSE
Eif2ak2	FALSE	FALSE	FALSE	TRUE	FALSE	FALSE	FALSE	FALSE	FALSE	FALSE	FALSE	TRUE	TRUE	FALSE
Gbp3	FALSE	FALSE	FALSE	TRUE	FALSE	FALSE	FALSE	FALSE	FALSE	FALSE	FALSE	TRUE	TRUE	FALSE
Tnfsf10	FALSE	FALSE	FALSE	TRUE	FALSE	FALSE	FALSE	FALSE	FALSE	FALSE	FALSE	TRUE	TRUE	FALSE
Tor3a	FALSE	FALSE	FALSE	TRUE	FALSE	FALSE	FALSE	FALSE	FALSE	FALSE	FALSE	TRUE	TRUE	FALSE
Gbp4	FALSE	FALSE	FALSE	TRUE	FALSE	FALSE	FALSE	FALSE	FALSE	FALSE	FALSE	FALSE	FALSE	FALSE
Stat1	FALSE	FALSE	FALSE	TRUE	FALSE	FALSE	FALSE	FALSE	FALSE	FALSE	FALSE	TRUE	TRUE	FALSE
Oasl1	FALSE	FALSE	FALSE	TRUE	FALSE	FALSE	FALSE	FALSE	FALSE	FALSE	FALSE	TRUE	TRUE	FALSE
Apobec3	FALSE	FALSE	FALSE	TRUE	FALSE	FALSE	FALSE	FALSE	FALSE	FALSE	FALSE	TRUE	TRUE	FALSE
Ddx58	FALSE	FALSE	FALSE	TRUE	FALSE	FALSE	FALSE	FALSE	FALSE	FALSE	FALSE	TRUE	TRUE	FALSE
Parp9	FALSE	FALSE	FALSE	TRUE	FALSE	FALSE	FALSE	FALSE	FALSE	FALSE	FALSE	TRUE	TRUE	FALSE
Pim1	FALSE	FALSE	FALSE	TRUE	FALSE	FALSE	FALSE	FALSE	FALSE	FALSE	FALSE	TRUE	TRUE	FALSE
Casp4	FALSE	FALSE	FALSE	TRUE	FALSE	FALSE	FALSE	FALSE	FALSE	FALSE	FALSE	TRUE	TRUE	FALSE
Samd9l	FALSE	FALSE	FALSE	TRUE	FALSE	FALSE	FALSE	FALSE	FALSE	FALSE	FALSE	TRUE	TRUE	FALSE
Sp100	FALSE	FALSE	FALSE	TRUE	FALSE	FALSE	FALSE	FALSE	FALSE	FALSE	FALSE	TRUE	TRUE	FALSE
Trim12a	FALSE	FALSE	FALSE	TRUE	FALSE	FALSE	FALSE	FALSE	FALSE	FALSE	FALSE	TRUE	TRUE	FALSE
Zufsp	FALSE	FALSE	FALSE	TRUE	FALSE	FALSE	FALSE	FALSE	FALSE	FALSE	FALSE	TRUE	TRUE	FALSE
Samhd1	FALSE	FALSE	FALSE	TRUE	FALSE	FALSE	FALSE	FALSE	FALSE	FALSE	FALSE	TRUE	FALSE	FALSE
Tap1	FALSE	FALSE	FALSE	TRUE	FALSE	FALSE	FALSE	FALSE	FALSE	FALSE	FALSE	TRUE	TRUE	FALSE
Slfn2	FALSE	FALSE	FALSE	TRUE	FALSE	FALSE	FALSE	FALSE	FALSE	FALSE	FALSE	TRUE	FALSE	FALSE
Ehd4	FALSE	FALSE	FALSE	TRUE	FALSE	FALSE	FALSE	FALSE	FALSE	FALSE	FALSE	TRUE	TRUE	FALSE
Ncoa7	FALSE	FALSE	FALSE	TRUE	FALSE	FALSE	FALSE	FALSE	FALSE	FALSE	FALSE	TRUE	TRUE	FALSE
Ly6e	FALSE	FALSE	FALSE	TRUE	FALSE	FALSE	FALSE	FALSE	FALSE	FALSE	FALSE	TRUE	TRUE	TRUE
Cd274	FALSE	FALSE	FALSE	TRUE	FALSE	FALSE	FALSE	FALSE	FALSE	FALSE	FALSE	TRUE	FALSE	FALSE
9930111J21Rik2	FALSE	FALSE	FALSE	TRUE	FALSE	FALSE	FALSE	FALSE	FALSE	FALSE	FALSE	TRUE	TRUE	FALSE
Ifih1	FALSE	FALSE	FALSE	TRUE	FALSE	FALSE	FALSE	FALSE	FALSE	FALSE	FALSE	TRUE	TRUE	FALSE
Socs1	FALSE	FALSE	FALSE	TRUE	FALSE	FALSE	FALSE	FALSE	FALSE	FALSE	FALSE	TRUE	TRUE	FALSE
Stat2	FALSE	FALSE	FALSE	TRUE	FALSE	FALSE	FALSE	FALSE	FALSE	FALSE	FALSE	TRUE	TRUE	FALSE
Phf11b	FALSE	FALSE	FALSE	TRUE	FALSE	FALSE	FALSE	FALSE	FALSE	FALSE	FALSE	TRUE	FALSE	FALSE
Bst2	FALSE	FALSE	FALSE	TRUE	FALSE	FALSE	FALSE	FALSE	FALSE	FALSE	FALSE	TRUE	TRUE	FALSE
Zbp1	FALSE	FALSE	FALSE	TRUE	FALSE	FALSE	FALSE	FALSE	FALSE	FALSE	FALSE	TRUE	FALSE	FALSE
F830016B08Rik	FALSE	FALSE	FALSE	TRUE	FALSE	FALSE	FALSE	FALSE	FALSE	FALSE	FALSE	FALSE	FALSE	FALSE
Batf	FALSE	FALSE	FALSE	TRUE	FALSE	FALSE	FALSE	FALSE	FALSE	FALSE	FALSE	TRUE	TRUE	FALSE
Znfx1	FALSE	FALSE	FALSE	TRUE	FALSE	FALSE	FALSE	FALSE	FALSE	FALSE	FALSE	TRUE	FALSE	FALSE
Ube2l6	FALSE	FALSE	FALSE	TRUE	FALSE	FALSE	FALSE	FALSE	FALSE	FALSE	FALSE	TRUE	FALSE	FALSE
Irgm2	FALSE	FALSE	FALSE	TRUE	FALSE	FALSE	FALSE	FALSE	FALSE	FALSE	FALSE	TRUE	TRUE	FALSE
Ifit3b	FALSE	FALSE	FALSE	TRUE	FALSE	FALSE	FALSE	FALSE	FALSE	FALSE	FALSE	TRUE	FALSE	FALSE
Arid5a	FALSE	FALSE	FALSE	TRUE	FALSE	FALSE	FALSE	FALSE	FALSE	FALSE	FALSE	TRUE	TRUE	FALSE
Dhx58	FALSE	FALSE	FALSE	TRUE	FALSE	FALSE	FALSE	FALSE	FALSE	FALSE	FALSE	FALSE	TRUE	FALSE
Trafd1	FALSE	FALSE	FALSE	TRUE	FALSE	FALSE	FALSE	FALSE	FALSE	FALSE	FALSE	TRUE	TRUE	FALSE
Mb21d1	FALSE	FALSE	FALSE	TRUE	FALSE	FALSE	FALSE	FALSE	FALSE	FALSE	FALSE	TRUE	TRUE	FALSE
Csrnp1	FALSE	FALSE	FALSE	TRUE	FALSE	FALSE	FALSE	FALSE	FALSE	FALSE	FALSE	TRUE	FALSE	FALSE
Daxx	FALSE	FALSE	FALSE	TRUE	FALSE	FALSE	FALSE	FALSE	FALSE	FALSE	FALSE	TRUE	TRUE	FALSE
Cish	FALSE	FALSE	FALSE	TRUE	TRUE	FALSE	FALSE	FALSE	FALSE	FALSE	FALSE	TRUE	TRUE	FALSE
Pnp	FALSE	FALSE	FALSE	TRUE	FALSE	FALSE	FALSE	FALSE	FALSE	FALSE	FALSE	TRUE	TRUE	FALSE
Xbp1	FALSE	FALSE	FALSE	TRUE	FALSE	FALSE	FALSE	FALSE	FALSE	FALSE	FALSE	FALSE	FALSE	FALSE
Socs2	FALSE	FALSE	FALSE	TRUE	FALSE	FALSE	FALSE	FALSE	FALSE	FALSE	FALSE	FALSE	FALSE	FALSE
Tgtp2	FALSE	FALSE	FALSE	TRUE	FALSE	FALSE	FALSE	FALSE	FALSE	FALSE	FALSE	FALSE	FALSE	FALSE
Nfkbia	FALSE	FALSE	FALSE	TRUE	FALSE	FALSE	FALSE	FALSE	FALSE	FALSE	FALSE	TRUE	TRUE	FALSE
Gadd45g	FALSE	FALSE	FALSE	TRUE	FALSE	FALSE	FALSE	FALSE	FALSE	FALSE	FALSE	FALSE	FALSE	FALSE
Ifi35	FALSE	FALSE	FALSE	TRUE	FALSE	FALSE	FALSE	FALSE	FALSE	FALSE	FALSE	TRUE	FALSE	FALSE
Slfn9	FALSE	FALSE	FALSE	TRUE	FALSE	FALSE	FALSE	FALSE	FALSE	FALSE	FALSE	FALSE	TRUE	FALSE
Trim12c	FALSE	FALSE	FALSE	TRUE	FALSE	FALSE	FALSE	FALSE	FALSE	FALSE	FALSE	TRUE	TRUE	FALSE
Rnf213	FALSE	FALSE	FALSE	TRUE	FALSE	FALSE	FALSE	FALSE	FALSE	FALSE	FALSE	TRUE	FALSE	FALSE
Plscr1	FALSE	FALSE	FALSE	TRUE	FALSE	FALSE	FALSE	FALSE	FALSE	FALSE	FALSE	FALSE	FALSE	FALSE
Dtx3l	FALSE	FALSE	FALSE	TRUE	FALSE	FALSE	FALSE	FALSE	FALSE	FALSE	FALSE	TRUE	FALSE	FALSE
Il27	FALSE	FALSE	FALSE	TRUE	FALSE	FALSE	FALSE	FALSE	FALSE	FALSE	FALSE	FALSE	FALSE	FALSE
Pml	FALSE	FALSE	FALSE	TRUE	FALSE	FALSE	FALSE	FALSE	FALSE	FALSE	FALSE	FALSE	FALSE	FALSE
Sbno2	FALSE	FALSE	FALSE	TRUE	FALSE	FALSE	FALSE	FALSE	FALSE	FALSE	FALSE	FALSE	FALSE	FALSE
Treml2	FALSE	FALSE	FALSE	TRUE	FALSE	FALSE	FALSE	FALSE	FALSE	FALSE	FALSE	FALSE	FALSE	FALSE
Samsn1	FALSE	FALSE	FALSE	TRUE	FALSE	FALSE	FALSE	FALSE	FALSE	FALSE	FALSE	TRUE	FALSE	FALSE
Oas3	FALSE	FALSE	FALSE	TRUE	FALSE	FALSE	FALSE	FALSE	FALSE	FALSE	FALSE	FALSE	TRUE	FALSE
Etnk1	FALSE	FALSE	FALSE	TRUE	FALSE	FALSE	FALSE	FALSE	FALSE	FALSE	FALSE	TRUE	FALSE	FALSE
Tsc22d3	FALSE	FALSE	FALSE	FALSE	TRUE	FALSE	FALSE	FALSE	FALSE	FALSE	TRUE	FALSE	FALSE	FALSE
Plaur	FALSE	FALSE	FALSE	FALSE	TRUE	FALSE	FALSE	FALSE	FALSE	FALSE	TRUE	FALSE	FALSE	FALSE
Ifngr1	FALSE	FALSE	FALSE	FALSE	TRUE	FALSE	FALSE	FALSE	FALSE	FALSE	TRUE	FALSE	FALSE	TRUE
Anks1	FALSE	FALSE	FALSE	FALSE	TRUE	FALSE	FALSE	FALSE	FALSE	FALSE	TRUE	FALSE	FALSE	FALSE
Rps28	FALSE	FALSE	FALSE	FALSE	TRUE	FALSE	TRUE	FALSE	FALSE	FALSE	FALSE	FALSE	FALSE	FALSE
Pde10a	FALSE	FALSE	FALSE	FALSE	TRUE	FALSE	FALSE	FALSE	FALSE	FALSE	TRUE	FALSE	FALSE	FALSE
Rpl37	FALSE	FALSE	FALSE	FALSE	TRUE	FALSE	FALSE	FALSE	FALSE	FALSE	TRUE	FALSE	FALSE	FALSE
Rnf125	FALSE	FALSE	FALSE	FALSE	TRUE	FALSE	FALSE	FALSE	FALSE	FALSE	TRUE	FALSE	FALSE	FALSE
Arpc3	FALSE	FALSE	FALSE	FALSE	TRUE	FALSE	FALSE	FALSE	FALSE	FALSE	TRUE	FALSE	FALSE	TRUE
mt-Nd3	FALSE	FALSE	FALSE	FALSE	TRUE	FALSE	FALSE	FALSE	FALSE	FALSE	TRUE	FALSE	FALSE	FALSE
Cirbp	FALSE	FALSE	FALSE	FALSE	TRUE	FALSE	FALSE	FALSE	FALSE	FALSE	TRUE	FALSE	FALSE	FALSE
Nek6	FALSE	FALSE	FALSE	FALSE	TRUE	FALSE	FALSE	FALSE	FALSE	FALSE	FALSE	FALSE	FALSE	FALSE
Rpl36	FALSE	FALSE	FALSE	FALSE	TRUE	FALSE	FALSE	FALSE	FALSE	FALSE	TRUE	FALSE	FALSE	FALSE
Rpl39	FALSE	FALSE	FALSE	FALSE	TRUE	FALSE	FALSE	FALSE	FALSE	FALSE	TRUE	FALSE	FALSE	FALSE
Rpl38	FALSE	FALSE	FALSE	FALSE	TRUE	FALSE	FALSE	FALSE	FALSE	FALSE	TRUE	FALSE	FALSE	FALSE
Rpl35	FALSE	FALSE	FALSE	FALSE	TRUE	FALSE	FALSE	FALSE	FALSE	FALSE	TRUE	FALSE	FALSE	FALSE
mt-Nd2	FALSE	FALSE	FALSE	FALSE	TRUE	FALSE	FALSE	FALSE	FALSE	FALSE	TRUE	FALSE	FALSE	FALSE
Mef2c	FALSE	FALSE	FALSE	FALSE	TRUE	FALSE	FALSE	FALSE	FALSE	FALSE	TRUE	FALSE	FALSE	FALSE
mt-Nd1	FALSE	FALSE	FALSE	FALSE	TRUE	FALSE	FALSE	FALSE	FALSE	FALSE	TRUE	FALSE	FALSE	FALSE
Mindy1	FALSE	FALSE	FALSE	FALSE	TRUE	FALSE	FALSE	FALSE	FALSE	FALSE	FALSE	FALSE	FALSE	FALSE
Lmcd1	FALSE	FALSE	FALSE	FALSE	TRUE	FALSE	FALSE	FALSE	FALSE	FALSE	FALSE	FALSE	FALSE	FALSE
Hspa4	FALSE	FALSE	FALSE	FALSE	TRUE	FALSE	FALSE	FALSE	FALSE	FALSE	FALSE	FALSE	FALSE	FALSE
Hk2	FALSE	FALSE	FALSE	FALSE	TRUE	FALSE	FALSE	FALSE	FALSE	FALSE	FALSE	FALSE	FALSE	FALSE
Fbxo9	FALSE	FALSE	FALSE	FALSE	TRUE	FALSE	FALSE	FALSE	FALSE	FALSE	TRUE	FALSE	FALSE	FALSE
Sla2	FALSE	FALSE	FALSE	FALSE	TRUE	FALSE	FALSE	FALSE	FALSE	FALSE	TRUE	FALSE	FALSE	FALSE
Ucp2	FALSE	FALSE	FALSE	FALSE	TRUE	FALSE	FALSE	FALSE	FALSE	FALSE	TRUE	FALSE	FALSE	FALSE
Ddit4	FALSE	FALSE	FALSE	FALSE	TRUE	FALSE	FALSE	FALSE	FALSE	FALSE	TRUE	FALSE	FALSE	FALSE
Rpl36a	FALSE	FALSE	FALSE	FALSE	TRUE	FALSE	FALSE	FALSE	FALSE	FALSE	TRUE	FALSE	FALSE	FALSE
Cytip	FALSE	FALSE	FALSE	FALSE	TRUE	FALSE	FALSE	FALSE	FALSE	FALSE	TRUE	FALSE	FALSE	FALSE
Myh9	FALSE	FALSE	FALSE	FALSE	TRUE	FALSE	FALSE	FALSE	FALSE	FALSE	FALSE	FALSE	FALSE	FALSE
Stxbp5	FALSE	FALSE	FALSE	FALSE	TRUE	FALSE	FALSE	FALSE	FALSE	FALSE	FALSE	FALSE	FALSE	FALSE
Rpl41	FALSE	FALSE	FALSE	FALSE	TRUE	FALSE	FALSE	FALSE	FALSE	FALSE	FALSE	FALSE	FALSE	FALSE
Foxo1	FALSE	FALSE	FALSE	FALSE	TRUE	FALSE	FALSE	FALSE	FALSE	FALSE	FALSE	FALSE	FALSE	FALSE
Ramp3	FALSE	FALSE	FALSE	FALSE	TRUE	FALSE	FALSE	FALSE	FALSE	FALSE	FALSE	FALSE	FALSE	FALSE
Txndc11	FALSE	FALSE	FALSE	FALSE	TRUE	FALSE	FALSE	FALSE	FALSE	FALSE	FALSE	FALSE	FALSE	FALSE
Ablim1	FALSE	FALSE	FALSE	FALSE	TRUE	FALSE	FALSE	FALSE	FALSE	FALSE	FALSE	FALSE	FALSE	FALSE
Snrk	FALSE	FALSE	FALSE	FALSE	TRUE	FALSE	FALSE	FALSE	FALSE	FALSE	FALSE	FALSE	FALSE	FALSE
Prdx6	FALSE	FALSE	FALSE	FALSE	TRUE	FALSE	FALSE	FALSE	FALSE	FALSE	TRUE	FALSE	FALSE	FALSE
Pde4d	FALSE	FALSE	FALSE	FALSE	TRUE	FALSE	FALSE	FALSE	FALSE	FALSE	TRUE	FALSE	FALSE	FALSE
Por	FALSE	FALSE	FALSE	FALSE	TRUE	FALSE	FALSE	FALSE	FALSE	FALSE	FALSE	FALSE	FALSE	FALSE
Dyrk3	FALSE	FALSE	FALSE	FALSE	TRUE	FALSE	FALSE	FALSE	FALSE	FALSE	FALSE	FALSE	FALSE	FALSE
Galc	FALSE	FALSE	FALSE	FALSE	TRUE	FALSE	FALSE	FALSE	FALSE	FALSE	FALSE	FALSE	FALSE	FALSE
Pim3	FALSE	FALSE	FALSE	FALSE	TRUE	FALSE	FALSE	FALSE	FALSE	FALSE	FALSE	FALSE	FALSE	FALSE
Fkbp1a	FALSE	FALSE	FALSE	FALSE	TRUE	FALSE	FALSE	FALSE	FALSE	FALSE	FALSE	FALSE	FALSE	FALSE
Upp1	FALSE	FALSE	FALSE	FALSE	TRUE	FALSE	FALSE	FALSE	FALSE	FALSE	FALSE	FALSE	FALSE	FALSE
Cers2	FALSE	FALSE	FALSE	FALSE	TRUE	FALSE	FALSE	FALSE	FALSE	FALSE	FALSE	FALSE	FALSE	FALSE
Tmsb4x	FALSE	FALSE	FALSE	FALSE	TRUE	FALSE	FALSE	FALSE	FALSE	FALSE	FALSE	FALSE	FALSE	TRUE
Hnrnpdl	FALSE	FALSE	FALSE	FALSE	TRUE	FALSE	FALSE	FALSE	FALSE	FALSE	FALSE	FALSE	FALSE	FALSE
Sult1a1	FALSE	FALSE	FALSE	FALSE	TRUE	FALSE	FALSE	FALSE	FALSE	FALSE	FALSE	FALSE	FALSE	FALSE
Map2k3	FALSE	FALSE	FALSE	FALSE	TRUE	FALSE	FALSE	FALSE	FALSE	FALSE	FALSE	FALSE	FALSE	FALSE
Tinagl1	FALSE	FALSE	FALSE	FALSE	TRUE	FALSE	FALSE	FALSE	FALSE	FALSE	FALSE	FALSE	FALSE	FALSE
Crem	FALSE	FALSE	FALSE	FALSE	TRUE	FALSE	FALSE	FALSE	FALSE	FALSE	FALSE	FALSE	FALSE	FALSE
Gpr132	FALSE	FALSE	FALSE	FALSE	TRUE	FALSE	FALSE	FALSE	FALSE	FALSE	FALSE	FALSE	FALSE	FALSE
Chd7	FALSE	FALSE	FALSE	FALSE	TRUE	FALSE	FALSE	FALSE	FALSE	FALSE	FALSE	FALSE	FALSE	FALSE
Cdk17	FALSE	FALSE	FALSE	FALSE	TRUE	FALSE	FALSE	FALSE	FALSE	FALSE	FALSE	FALSE	FALSE	FALSE
Man2a2	FALSE	FALSE	FALSE	FALSE	TRUE	FALSE	FALSE	FALSE	FALSE	FALSE	FALSE	FALSE	FALSE	FALSE
Pfkfb3	FALSE	FALSE	FALSE	FALSE	TRUE	FALSE	FALSE	FALSE	FALSE	FALSE	FALSE	FALSE	FALSE	FALSE
Stat4	FALSE	FALSE	FALSE	FALSE	TRUE	FALSE	FALSE	FALSE	FALSE	FALSE	TRUE	FALSE	FALSE	FALSE
Rplp2	FALSE	FALSE	FALSE	FALSE	TRUE	FALSE	FALSE	FALSE	FALSE	FALSE	FALSE	FALSE	FALSE	FALSE
Pdcd6	FALSE	FALSE	FALSE	FALSE	TRUE	FALSE	FALSE	FALSE	FALSE	FALSE	FALSE	FALSE	FALSE	FALSE
Eef1a1	FALSE	FALSE	FALSE	FALSE	TRUE	FALSE	TRUE	FALSE	FALSE	FALSE	TRUE	FALSE	FALSE	FALSE
Rpl27	FALSE	FALSE	FALSE	FALSE	TRUE	FALSE	FALSE	FALSE	FALSE	FALSE	FALSE	FALSE	FALSE	FALSE
P2rx4	FALSE	FALSE	FALSE	FALSE	TRUE	FALSE	FALSE	FALSE	FALSE	FALSE	FALSE	FALSE	FALSE	FALSE
Egfl7	FALSE	FALSE	FALSE	FALSE	TRUE	FALSE	FALSE	FALSE	FALSE	FALSE	FALSE	FALSE	FALSE	FALSE
Slc44a2	FALSE	FALSE	FALSE	FALSE	TRUE	FALSE	FALSE	FALSE	FALSE	FALSE	FALSE	FALSE	FALSE	FALSE
Elmsan1	FALSE	FALSE	FALSE	FALSE	TRUE	FALSE	FALSE	FALSE	FALSE	FALSE	FALSE	FALSE	FALSE	FALSE
Rab27b	FALSE	FALSE	FALSE	FALSE	TRUE	FALSE	FALSE	FALSE	FALSE	FALSE	FALSE	FALSE	FALSE	FALSE
St7	FALSE	FALSE	FALSE	FALSE	TRUE	FALSE	FALSE	FALSE	FALSE	FALSE	FALSE	FALSE	FALSE	FALSE
Ago2	FALSE	FALSE	FALSE	FALSE	TRUE	FALSE	FALSE	FALSE	FALSE	FALSE	FALSE	FALSE	FALSE	FALSE
Vapa	FALSE	FALSE	FALSE	FALSE	TRUE	FALSE	FALSE	FALSE	FALSE	FALSE	FALSE	FALSE	FALSE	FALSE
Gm11808	FALSE	FALSE	FALSE	FALSE	TRUE	FALSE	FALSE	FALSE	FALSE	FALSE	FALSE	FALSE	FALSE	FALSE
N4bp2	FALSE	FALSE	FALSE	FALSE	TRUE	FALSE	FALSE	FALSE	FALSE	FALSE	FALSE	FALSE	FALSE	FALSE
Pde4b	FALSE	FALSE	FALSE	FALSE	TRUE	FALSE	FALSE	FALSE	FALSE	FALSE	TRUE	FALSE	FALSE	FALSE
Hmgb2	FALSE	FALSE	FALSE	FALSE	FALSE	TRUE	FALSE	FALSE	FALSE	TRUE	FALSE	FALSE	TRUE	FALSE
Stmn1	FALSE	FALSE	FALSE	FALSE	FALSE	TRUE	FALSE	TRUE	FALSE	TRUE	FALSE	FALSE	FALSE	FALSE
Hmgb1	FALSE	FALSE	FALSE	FALSE	FALSE	TRUE	FALSE	FALSE	FALSE	TRUE	FALSE	FALSE	FALSE	FALSE
Mki67	FALSE	FALSE	FALSE	FALSE	FALSE	TRUE	FALSE	FALSE	FALSE	TRUE	FALSE	FALSE	TRUE	FALSE
H2afv	FALSE	FALSE	FALSE	FALSE	FALSE	TRUE	FALSE	FALSE	FALSE	TRUE	FALSE	FALSE	FALSE	FALSE
Cks1b	FALSE	FALSE	FALSE	FALSE	FALSE	TRUE	FALSE	FALSE	FALSE	TRUE	FALSE	FALSE	FALSE	FALSE
Spc24	FALSE	FALSE	FALSE	FALSE	FALSE	TRUE	FALSE	TRUE	FALSE	TRUE	FALSE	FALSE	FALSE	FALSE
Top2a	FALSE	FALSE	FALSE	FALSE	FALSE	TRUE	FALSE	TRUE	FALSE	TRUE	FALSE	FALSE	TRUE	FALSE
Tubb5	FALSE	FALSE	FALSE	FALSE	FALSE	TRUE	FALSE	TRUE	FALSE	TRUE	FALSE	FALSE	FALSE	FALSE
Cks2	FALSE	FALSE	FALSE	FALSE	FALSE	TRUE	FALSE	FALSE	FALSE	TRUE	FALSE	FALSE	TRUE	FALSE
Birc5	FALSE	FALSE	FALSE	FALSE	FALSE	TRUE	FALSE	FALSE	FALSE	TRUE	FALSE	FALSE	TRUE	FALSE
Lmnb1	FALSE	FALSE	FALSE	FALSE	FALSE	TRUE	FALSE	FALSE	FALSE	TRUE	FALSE	FALSE	FALSE	FALSE
Smc2	FALSE	FALSE	FALSE	FALSE	FALSE	TRUE	FALSE	FALSE	FALSE	TRUE	FALSE	FALSE	TRUE	FALSE
Cdca8	FALSE	FALSE	FALSE	FALSE	FALSE	TRUE	FALSE	FALSE	FALSE	TRUE	FALSE	FALSE	TRUE	FALSE
Hmgn2	FALSE	FALSE	FALSE	FALSE	FALSE	TRUE	FALSE	FALSE	FALSE	TRUE	FALSE	FALSE	FALSE	FALSE
Smc4	FALSE	FALSE	FALSE	FALSE	FALSE	TRUE	FALSE	FALSE	FALSE	TRUE	FALSE	FALSE	TRUE	FALSE
Pbk	FALSE	FALSE	FALSE	FALSE	FALSE	TRUE	FALSE	FALSE	FALSE	TRUE	FALSE	FALSE	FALSE	FALSE
Dek	FALSE	FALSE	FALSE	FALSE	FALSE	TRUE	FALSE	TRUE	FALSE	FALSE	FALSE	FALSE	FALSE	FALSE
Tk1	FALSE	FALSE	FALSE	FALSE	FALSE	TRUE	FALSE	TRUE	FALSE	FALSE	FALSE	FALSE	FALSE	FALSE
Nucks1	FALSE	FALSE	FALSE	FALSE	FALSE	TRUE	FALSE	FALSE	FALSE	TRUE	FALSE	FALSE	FALSE	FALSE
Ube2s	FALSE	FALSE	FALSE	FALSE	FALSE	TRUE	FALSE	FALSE	FALSE	TRUE	FALSE	FALSE	TRUE	FALSE
Rrm1	FALSE	FALSE	FALSE	FALSE	FALSE	TRUE	FALSE	TRUE	FALSE	FALSE	FALSE	FALSE	FALSE	FALSE
Cdk1	FALSE	FALSE	FALSE	FALSE	FALSE	TRUE	FALSE	FALSE	FALSE	TRUE	FALSE	FALSE	TRUE	FALSE
Cenpm	FALSE	FALSE	FALSE	FALSE	FALSE	TRUE	FALSE	TRUE	FALSE	FALSE	FALSE	FALSE	FALSE	FALSE
Tmpo	FALSE	FALSE	FALSE	FALSE	FALSE	TRUE	FALSE	FALSE	FALSE	TRUE	FALSE	FALSE	FALSE	FALSE
Gmnn	FALSE	FALSE	FALSE	FALSE	FALSE	TRUE	FALSE	TRUE	FALSE	FALSE	FALSE	FALSE	FALSE	FALSE
Ezh2	FALSE	FALSE	FALSE	FALSE	FALSE	TRUE	FALSE	TRUE	FALSE	FALSE	FALSE	FALSE	FALSE	FALSE
H2afx	FALSE	FALSE	FALSE	FALSE	FALSE	TRUE	FALSE	FALSE	FALSE	TRUE	FALSE	FALSE	TRUE	FALSE
Tubb4b	FALSE	FALSE	FALSE	FALSE	FALSE	TRUE	FALSE	FALSE	FALSE	TRUE	FALSE	FALSE	FALSE	FALSE
Tpx2	FALSE	FALSE	FALSE	FALSE	FALSE	TRUE	FALSE	FALSE	FALSE	TRUE	FALSE	FALSE	TRUE	FALSE
Cenpk	FALSE	FALSE	FALSE	FALSE	FALSE	TRUE	FALSE	FALSE	FALSE	FALSE	FALSE	FALSE	FALSE	FALSE
Pclaf	FALSE	FALSE	FALSE	FALSE	FALSE	TRUE	FALSE	TRUE	FALSE	FALSE	FALSE	FALSE	FALSE	FALSE
Lockd	FALSE	FALSE	FALSE	FALSE	FALSE	TRUE	FALSE	FALSE	FALSE	TRUE	FALSE	FALSE	FALSE	FALSE
Cdca3	FALSE	FALSE	FALSE	FALSE	FALSE	TRUE	FALSE	FALSE	FALSE	TRUE	FALSE	FALSE	TRUE	FALSE
H1fx	FALSE	FALSE	FALSE	FALSE	FALSE	TRUE	FALSE	FALSE	FALSE	FALSE	FALSE	FALSE	FALSE	FALSE
Ccdc34	FALSE	FALSE	FALSE	FALSE	FALSE	TRUE	FALSE	FALSE	FALSE	TRUE	FALSE	FALSE	FALSE	FALSE
Tyms	FALSE	FALSE	FALSE	FALSE	FALSE	TRUE	FALSE	TRUE	FALSE	FALSE	FALSE	FALSE	FALSE	FALSE
Cenpf	FALSE	FALSE	FALSE	FALSE	FALSE	TRUE	FALSE	FALSE	FALSE	TRUE	FALSE	FALSE	FALSE	FALSE
Rad51	FALSE	FALSE	FALSE	FALSE	FALSE	TRUE	FALSE	TRUE	FALSE	FALSE	FALSE	FALSE	FALSE	FALSE
Kif15	FALSE	FALSE	FALSE	FALSE	FALSE	TRUE	FALSE	FALSE	FALSE	TRUE	FALSE	FALSE	FALSE	FALSE
Ccnb2	FALSE	FALSE	FALSE	FALSE	FALSE	TRUE	FALSE	FALSE	FALSE	TRUE	FALSE	FALSE	TRUE	FALSE
Dnajc9	FALSE	FALSE	FALSE	FALSE	FALSE	TRUE	FALSE	TRUE	FALSE	FALSE	FALSE	FALSE	FALSE	FALSE
Nrm	FALSE	FALSE	FALSE	FALSE	FALSE	TRUE	FALSE	FALSE	FALSE	FALSE	FALSE	FALSE	FALSE	FALSE
Ccna2	FALSE	FALSE	FALSE	FALSE	FALSE	TRUE	FALSE	FALSE	FALSE	TRUE	FALSE	FALSE	TRUE	FALSE
Lig1	FALSE	FALSE	FALSE	FALSE	FALSE	TRUE	FALSE	TRUE	FALSE	FALSE	FALSE	FALSE	FALSE	FALSE
Atad2	FALSE	FALSE	FALSE	FALSE	FALSE	TRUE	FALSE	TRUE	FALSE	FALSE	FALSE	FALSE	FALSE	FALSE
Clspn	FALSE	FALSE	FALSE	FALSE	FALSE	TRUE	FALSE	TRUE	FALSE	FALSE	FALSE	FALSE	FALSE	FALSE
Hint1	FALSE	FALSE	FALSE	FALSE	FALSE	TRUE	FALSE	TRUE	FALSE	FALSE	FALSE	FALSE	FALSE	FALSE
Cenph	FALSE	FALSE	FALSE	FALSE	FALSE	TRUE	FALSE	FALSE	FALSE	FALSE	FALSE	FALSE	FALSE	FALSE
Prc1	FALSE	FALSE	FALSE	FALSE	FALSE	TRUE	FALSE	FALSE	FALSE	TRUE	FALSE	FALSE	TRUE	FALSE
Nusap1	FALSE	FALSE	FALSE	FALSE	FALSE	TRUE	FALSE	FALSE	FALSE	TRUE	FALSE	FALSE	TRUE	FALSE
Uhrf1	FALSE	FALSE	FALSE	FALSE	FALSE	TRUE	FALSE	TRUE	FALSE	FALSE	FALSE	FALSE	FALSE	FALSE
Ckap2l	FALSE	FALSE	FALSE	FALSE	FALSE	TRUE	FALSE	FALSE	FALSE	TRUE	FALSE	FALSE	FALSE	FALSE
Knstrn	FALSE	FALSE	FALSE	FALSE	FALSE	TRUE	FALSE	FALSE	FALSE	TRUE	FALSE	FALSE	FALSE	FALSE
Hmgn1	FALSE	FALSE	FALSE	FALSE	FALSE	TRUE	FALSE	TRUE	FALSE	FALSE	FALSE	FALSE	FALSE	FALSE
Nasp	FALSE	FALSE	FALSE	FALSE	FALSE	TRUE	FALSE	TRUE	FALSE	FALSE	FALSE	FALSE	FALSE	FALSE
Mad2l1	FALSE	FALSE	FALSE	FALSE	FALSE	TRUE	FALSE	FALSE	FALSE	TRUE	FALSE	FALSE	FALSE	FALSE
Neil3	FALSE	FALSE	FALSE	FALSE	FALSE	TRUE	FALSE	FALSE	FALSE	TRUE	FALSE	FALSE	FALSE	FALSE
Selenoh	FALSE	FALSE	FALSE	FALSE	FALSE	TRUE	FALSE	FALSE	FALSE	TRUE	FALSE	FALSE	FALSE	FALSE
Aurkb	FALSE	FALSE	FALSE	FALSE	FALSE	TRUE	FALSE	FALSE	FALSE	TRUE	FALSE	FALSE	FALSE	FALSE
Cenpw	FALSE	FALSE	FALSE	FALSE	FALSE	TRUE	FALSE	FALSE	FALSE	FALSE	FALSE	FALSE	FALSE	FALSE
Mcm7	FALSE	FALSE	FALSE	FALSE	FALSE	TRUE	FALSE	TRUE	FALSE	FALSE	FALSE	FALSE	FALSE	FALSE
Raly	FALSE	FALSE	FALSE	FALSE	FALSE	TRUE	FALSE	FALSE	FALSE	FALSE	FALSE	FALSE	FALSE	FALSE
Rfc4	FALSE	FALSE	FALSE	FALSE	FALSE	TRUE	FALSE	TRUE	FALSE	FALSE	FALSE	FALSE	FALSE	FALSE
Lsm2	FALSE	FALSE	FALSE	FALSE	FALSE	TRUE	FALSE	TRUE	FALSE	FALSE	FALSE	FALSE	FALSE	FALSE
Dnmt1	FALSE	FALSE	FALSE	FALSE	FALSE	TRUE	FALSE	TRUE	FALSE	FALSE	FALSE	FALSE	FALSE	FALSE
Rad51ap1	FALSE	FALSE	FALSE	FALSE	FALSE	TRUE	FALSE	TRUE	FALSE	FALSE	FALSE	FALSE	FALSE	FALSE
Cdc20	FALSE	FALSE	FALSE	FALSE	FALSE	TRUE	FALSE	FALSE	FALSE	TRUE	FALSE	FALSE	FALSE	FALSE
Ncapd2	FALSE	FALSE	FALSE	FALSE	FALSE	TRUE	FALSE	FALSE	FALSE	TRUE	FALSE	FALSE	FALSE	FALSE
Mcm5	FALSE	FALSE	FALSE	FALSE	FALSE	TRUE	FALSE	TRUE	FALSE	FALSE	FALSE	FALSE	FALSE	FALSE
Kif20b	FALSE	FALSE	FALSE	FALSE	FALSE	TRUE	FALSE	FALSE	FALSE	TRUE	FALSE	FALSE	FALSE	FALSE
Knl1	FALSE	FALSE	FALSE	FALSE	FALSE	TRUE	FALSE	FALSE	FALSE	TRUE	FALSE	FALSE	TRUE	FALSE
Racgap1	FALSE	FALSE	FALSE	FALSE	FALSE	TRUE	FALSE	FALSE	FALSE	TRUE	FALSE	FALSE	FALSE	FALSE
Mns1	FALSE	FALSE	FALSE	FALSE	FALSE	TRUE	FALSE	FALSE	FALSE	FALSE	FALSE	FALSE	FALSE	FALSE
Dtymk	FALSE	FALSE	FALSE	FALSE	FALSE	TRUE	FALSE	TRUE	FALSE	FALSE	FALSE	FALSE	FALSE	FALSE
Hirip3	FALSE	FALSE	FALSE	FALSE	FALSE	TRUE	FALSE	FALSE	FALSE	FALSE	FALSE	FALSE	FALSE	FALSE
Fignl1	FALSE	FALSE	FALSE	FALSE	FALSE	TRUE	FALSE	FALSE	FALSE	FALSE	FALSE	FALSE	FALSE	FALSE
Asf1b	FALSE	FALSE	FALSE	FALSE	FALSE	TRUE	FALSE	FALSE	FALSE	FALSE	FALSE	FALSE	FALSE	FALSE
Prim1	FALSE	FALSE	FALSE	FALSE	FALSE	TRUE	FALSE	TRUE	FALSE	FALSE	FALSE	FALSE	FALSE	FALSE
Srsf7	FALSE	FALSE	FALSE	FALSE	FALSE	TRUE	FALSE	FALSE	FALSE	FALSE	FALSE	FALSE	FALSE	FALSE
Cenpe	FALSE	FALSE	FALSE	FALSE	FALSE	TRUE	FALSE	FALSE	FALSE	TRUE	FALSE	FALSE	TRUE	FALSE
Dynll1	FALSE	FALSE	FALSE	FALSE	FALSE	TRUE	FALSE	FALSE	FALSE	FALSE	FALSE	FALSE	FALSE	FALSE
Kif11	FALSE	FALSE	FALSE	FALSE	FALSE	TRUE	FALSE	FALSE	FALSE	TRUE	FALSE	FALSE	TRUE	FALSE
Shcbp1	FALSE	FALSE	FALSE	FALSE	FALSE	TRUE	FALSE	FALSE	FALSE	TRUE	FALSE	FALSE	FALSE	FALSE
Nuf2	FALSE	FALSE	FALSE	FALSE	FALSE	TRUE	FALSE	FALSE	FALSE	TRUE	FALSE	FALSE	FALSE	FALSE
Tipin	FALSE	FALSE	FALSE	FALSE	FALSE	TRUE	FALSE	TRUE	FALSE	FALSE	FALSE	FALSE	FALSE	FALSE
Rpl32	FALSE	FALSE	FALSE	FALSE	FALSE	FALSE	TRUE	FALSE	FALSE	FALSE	TRUE	FALSE	FALSE	FALSE
Rps18	FALSE	FALSE	FALSE	FALSE	FALSE	FALSE	TRUE	FALSE	TRUE	FALSE	FALSE	FALSE	FALSE	FALSE
Rps11	FALSE	FALSE	FALSE	FALSE	FALSE	FALSE	TRUE	FALSE	FALSE	FALSE	FALSE	FALSE	FALSE	FALSE
Rpl18	FALSE	FALSE	FALSE	FALSE	FALSE	FALSE	TRUE	FALSE	FALSE	FALSE	FALSE	FALSE	FALSE	FALSE
Sox4	FALSE	FALSE	FALSE	FALSE	FALSE	FALSE	TRUE	FALSE	FALSE	FALSE	FALSE	FALSE	FALSE	FALSE
Cd37	FALSE	FALSE	FALSE	FALSE	FALSE	FALSE	TRUE	FALSE	FALSE	FALSE	FALSE	FALSE	FALSE	FALSE
Rps13	FALSE	FALSE	FALSE	FALSE	FALSE	FALSE	TRUE	FALSE	TRUE	FALSE	FALSE	FALSE	FALSE	FALSE
Naca	FALSE	FALSE	FALSE	FALSE	FALSE	FALSE	TRUE	FALSE	FALSE	FALSE	FALSE	FALSE	FALSE	FALSE
Arhgdib	FALSE	FALSE	FALSE	FALSE	FALSE	FALSE	TRUE	FALSE	FALSE	FALSE	FALSE	FALSE	FALSE	FALSE
Rpl3	FALSE	FALSE	FALSE	FALSE	FALSE	FALSE	TRUE	FALSE	FALSE	FALSE	FALSE	FALSE	FALSE	FALSE
Ramp1	FALSE	FALSE	FALSE	FALSE	FALSE	FALSE	TRUE	FALSE	FALSE	FALSE	FALSE	FALSE	FALSE	FALSE
Rplp0	FALSE	FALSE	FALSE	FALSE	FALSE	FALSE	TRUE	FALSE	FALSE	FALSE	FALSE	FALSE	FALSE	FALSE
Rps27a	FALSE	FALSE	FALSE	FALSE	FALSE	FALSE	TRUE	FALSE	FALSE	FALSE	FALSE	FALSE	FALSE	FALSE
Rack1	FALSE	FALSE	FALSE	FALSE	FALSE	FALSE	TRUE	FALSE	FALSE	FALSE	FALSE	FALSE	FALSE	FALSE
Aldoa	FALSE	FALSE	FALSE	FALSE	FALSE	FALSE	TRUE	FALSE	TRUE	FALSE	FALSE	FALSE	FALSE	FALSE
Cd34	FALSE	FALSE	FALSE	FALSE	FALSE	FALSE	TRUE	FALSE	FALSE	FALSE	FALSE	FALSE	FALSE	FALSE
Rpl22	FALSE	FALSE	FALSE	FALSE	FALSE	FALSE	TRUE	FALSE	FALSE	FALSE	FALSE	FALSE	FALSE	FALSE
Wfdc17	FALSE	FALSE	FALSE	FALSE	FALSE	FALSE	TRUE	FALSE	FALSE	FALSE	FALSE	FALSE	FALSE	FALSE
Rpl29	FALSE	FALSE	FALSE	FALSE	FALSE	FALSE	TRUE	FALSE	FALSE	FALSE	FALSE	FALSE	FALSE	FALSE
Il12a	FALSE	FALSE	FALSE	FALSE	FALSE	FALSE	TRUE	FALSE	FALSE	FALSE	FALSE	FALSE	FALSE	FALSE
Rpl24	FALSE	FALSE	FALSE	FALSE	FALSE	FALSE	TRUE	FALSE	TRUE	FALSE	FALSE	FALSE	FALSE	FALSE
Rpl10a	FALSE	FALSE	FALSE	FALSE	FALSE	FALSE	TRUE	FALSE	FALSE	FALSE	FALSE	FALSE	FALSE	FALSE
H2afy	FALSE	FALSE	FALSE	FALSE	FALSE	FALSE	TRUE	FALSE	FALSE	FALSE	FALSE	FALSE	FALSE	FALSE
Rps26	FALSE	FALSE	FALSE	FALSE	FALSE	FALSE	TRUE	FALSE	FALSE	FALSE	FALSE	FALSE	FALSE	FALSE
Serpinb1a	FALSE	FALSE	FALSE	FALSE	FALSE	FALSE	TRUE	FALSE	FALSE	FALSE	FALSE	FALSE	FALSE	FALSE
Gcnt2	FALSE	FALSE	FALSE	FALSE	FALSE	FALSE	TRUE	FALSE	TRUE	FALSE	FALSE	FALSE	FALSE	FALSE
Rps15a	FALSE	FALSE	FALSE	FALSE	FALSE	FALSE	TRUE	FALSE	FALSE	FALSE	FALSE	FALSE	FALSE	FALSE
Cd52	FALSE	FALSE	FALSE	FALSE	FALSE	FALSE	TRUE	FALSE	FALSE	FALSE	FALSE	FALSE	FALSE	FALSE
Plac8	FALSE	FALSE	FALSE	FALSE	FALSE	FALSE	TRUE	FALSE	FALSE	FALSE	FALSE	FALSE	FALSE	TRUE
Tespa1	FALSE	FALSE	FALSE	FALSE	FALSE	FALSE	TRUE	FALSE	FALSE	FALSE	FALSE	FALSE	FALSE	FALSE
Ptprcap	FALSE	FALSE	FALSE	FALSE	FALSE	FALSE	TRUE	FALSE	TRUE	FALSE	FALSE	FALSE	FALSE	FALSE
Rps2	FALSE	FALSE	FALSE	FALSE	FALSE	FALSE	TRUE	FALSE	FALSE	FALSE	FALSE	FALSE	FALSE	FALSE
Lyl1	FALSE	FALSE	FALSE	FALSE	FALSE	FALSE	TRUE	FALSE	FALSE	FALSE	FALSE	FALSE	FALSE	FALSE
Ptpre	FALSE	FALSE	FALSE	FALSE	FALSE	FALSE	TRUE	FALSE	FALSE	FALSE	FALSE	FALSE	FALSE	FALSE
Mtdh	FALSE	FALSE	FALSE	FALSE	FALSE	FALSE	TRUE	FALSE	FALSE	FALSE	FALSE	FALSE	FALSE	FALSE
Cbfa2t3	FALSE	FALSE	FALSE	FALSE	FALSE	FALSE	TRUE	FALSE	TRUE	FALSE	FALSE	FALSE	FALSE	FALSE
Flt3	FALSE	FALSE	FALSE	FALSE	FALSE	FALSE	TRUE	FALSE	FALSE	FALSE	FALSE	FALSE	FALSE	FALSE
Rpl15	FALSE	FALSE	FALSE	FALSE	FALSE	FALSE	TRUE	FALSE	FALSE	FALSE	FALSE	FALSE	FALSE	FALSE
Myc	FALSE	FALSE	FALSE	FALSE	FALSE	FALSE	TRUE	FALSE	FALSE	FALSE	FALSE	FALSE	FALSE	FALSE
Bmyc	FALSE	FALSE	FALSE	FALSE	FALSE	FALSE	TRUE	FALSE	FALSE	FALSE	FALSE	FALSE	FALSE	FALSE
Pou2f2	FALSE	FALSE	FALSE	FALSE	FALSE	FALSE	TRUE	FALSE	FALSE	FALSE	FALSE	FALSE	FALSE	FALSE
Cd27	FALSE	FALSE	FALSE	FALSE	FALSE	FALSE	TRUE	FALSE	FALSE	FALSE	FALSE	FALSE	FALSE	FALSE
Rps16	FALSE	FALSE	FALSE	FALSE	FALSE	FALSE	TRUE	FALSE	FALSE	FALSE	FALSE	FALSE	FALSE	FALSE
Ighm	FALSE	FALSE	FALSE	FALSE	FALSE	FALSE	TRUE	FALSE	FALSE	FALSE	FALSE	FALSE	FALSE	FALSE
Taldo1	FALSE	FALSE	FALSE	FALSE	FALSE	FALSE	TRUE	FALSE	FALSE	FALSE	FALSE	FALSE	FALSE	TRUE
Hoxa9	FALSE	FALSE	FALSE	FALSE	FALSE	FALSE	TRUE	FALSE	FALSE	FALSE	FALSE	FALSE	FALSE	FALSE
Eef1b2	FALSE	FALSE	FALSE	FALSE	FALSE	FALSE	TRUE	FALSE	FALSE	FALSE	FALSE	FALSE	FALSE	FALSE
Lat2	FALSE	FALSE	FALSE	FALSE	FALSE	FALSE	TRUE	FALSE	FALSE	FALSE	FALSE	FALSE	FALSE	FALSE
Fam117a	FALSE	FALSE	FALSE	FALSE	FALSE	FALSE	TRUE	FALSE	FALSE	FALSE	FALSE	FALSE	FALSE	FALSE
Satb1	FALSE	FALSE	FALSE	FALSE	FALSE	FALSE	TRUE	FALSE	FALSE	FALSE	FALSE	FALSE	FALSE	FALSE
Rpl8	FALSE	FALSE	FALSE	FALSE	FALSE	FALSE	TRUE	FALSE	FALSE	FALSE	FALSE	FALSE	FALSE	FALSE
Mgat1	FALSE	FALSE	FALSE	FALSE	FALSE	FALSE	TRUE	FALSE	FALSE	FALSE	FALSE	FALSE	FALSE	FALSE
Il16	FALSE	FALSE	FALSE	FALSE	FALSE	FALSE	TRUE	FALSE	FALSE	FALSE	FALSE	FALSE	FALSE	FALSE
BC035044	FALSE	FALSE	FALSE	FALSE	FALSE	FALSE	TRUE	FALSE	FALSE	FALSE	FALSE	FALSE	FALSE	FALSE
Gm5111	FALSE	FALSE	FALSE	FALSE	FALSE	FALSE	TRUE	FALSE	FALSE	FALSE	FALSE	FALSE	FALSE	FALSE
Coro1a	FALSE	FALSE	FALSE	FALSE	FALSE	FALSE	TRUE	FALSE	FALSE	FALSE	FALSE	FALSE	FALSE	FALSE
Hhex	FALSE	FALSE	FALSE	FALSE	FALSE	FALSE	TRUE	FALSE	FALSE	FALSE	FALSE	FALSE	FALSE	FALSE
Fam212a	FALSE	FALSE	FALSE	FALSE	FALSE	FALSE	TRUE	FALSE	FALSE	FALSE	FALSE	FALSE	FALSE	FALSE
Tspan32	FALSE	FALSE	FALSE	FALSE	FALSE	FALSE	TRUE	FALSE	FALSE	FALSE	FALSE	FALSE	FALSE	FALSE
Sh2d5	FALSE	FALSE	FALSE	FALSE	FALSE	FALSE	TRUE	FALSE	FALSE	FALSE	FALSE	FALSE	FALSE	FALSE
Fxyd5	FALSE	FALSE	FALSE	FALSE	FALSE	FALSE	TRUE	FALSE	FALSE	FALSE	FALSE	FALSE	FALSE	FALSE
Cd53	FALSE	FALSE	FALSE	FALSE	FALSE	FALSE	TRUE	FALSE	FALSE	FALSE	FALSE	FALSE	FALSE	FALSE
Adgrl4	FALSE	FALSE	FALSE	FALSE	FALSE	FALSE	TRUE	FALSE	FALSE	FALSE	FALSE	FALSE	FALSE	FALSE
Tcp11l2	FALSE	FALSE	FALSE	FALSE	FALSE	FALSE	TRUE	FALSE	FALSE	FALSE	FALSE	FALSE	FALSE	FALSE
Vldlr	FALSE	FALSE	FALSE	FALSE	FALSE	FALSE	TRUE	FALSE	FALSE	FALSE	FALSE	FALSE	FALSE	FALSE
Rpa2	FALSE	FALSE	FALSE	FALSE	FALSE	FALSE	FALSE	TRUE	FALSE	FALSE	FALSE	FALSE	FALSE	FALSE
Siva1	FALSE	FALSE	FALSE	FALSE	FALSE	FALSE	FALSE	TRUE	FALSE	FALSE	FALSE	FALSE	FALSE	FALSE
Dhfr	FALSE	FALSE	FALSE	FALSE	FALSE	FALSE	FALSE	TRUE	FALSE	FALSE	FALSE	FALSE	FALSE	FALSE
Slbp	FALSE	FALSE	FALSE	FALSE	FALSE	FALSE	FALSE	TRUE	FALSE	FALSE	FALSE	FALSE	FALSE	FALSE
Pcna	FALSE	FALSE	FALSE	FALSE	FALSE	FALSE	FALSE	TRUE	FALSE	FALSE	FALSE	FALSE	FALSE	FALSE
Fen1	FALSE	FALSE	FALSE	FALSE	FALSE	FALSE	FALSE	TRUE	FALSE	FALSE	FALSE	FALSE	FALSE	FALSE
Rrm2	FALSE	FALSE	FALSE	FALSE	FALSE	FALSE	FALSE	TRUE	FALSE	FALSE	FALSE	FALSE	FALSE	FALSE
Tpi1	FALSE	FALSE	FALSE	FALSE	FALSE	FALSE	FALSE	TRUE	FALSE	FALSE	FALSE	FALSE	FALSE	FALSE
Syce2	FALSE	FALSE	FALSE	FALSE	FALSE	FALSE	FALSE	TRUE	FALSE	FALSE	FALSE	FALSE	FALSE	FALSE
Alyref	FALSE	FALSE	FALSE	FALSE	FALSE	FALSE	FALSE	TRUE	FALSE	FALSE	FALSE	FALSE	FALSE	FALSE
Mcm2	FALSE	FALSE	FALSE	FALSE	FALSE	FALSE	FALSE	TRUE	FALSE	FALSE	FALSE	FALSE	FALSE	FALSE
Nudc	FALSE	FALSE	FALSE	FALSE	FALSE	FALSE	FALSE	TRUE	FALSE	FALSE	FALSE	FALSE	FALSE	FALSE
Nt5dc2	FALSE	FALSE	FALSE	FALSE	FALSE	FALSE	FALSE	TRUE	FALSE	FALSE	FALSE	FALSE	FALSE	FALSE
Rfc2	FALSE	FALSE	FALSE	FALSE	FALSE	FALSE	FALSE	TRUE	FALSE	FALSE	FALSE	FALSE	FALSE	FALSE
Dtl	FALSE	FALSE	FALSE	FALSE	FALSE	FALSE	FALSE	TRUE	FALSE	FALSE	FALSE	FALSE	FALSE	FALSE
Hat1	FALSE	FALSE	FALSE	FALSE	FALSE	FALSE	FALSE	TRUE	FALSE	FALSE	FALSE	FALSE	FALSE	FALSE
Tfdp1	FALSE	FALSE	FALSE	FALSE	FALSE	FALSE	FALSE	TRUE	FALSE	FALSE	FALSE	FALSE	FALSE	FALSE
Mrpl18	FALSE	FALSE	FALSE	FALSE	FALSE	FALSE	FALSE	TRUE	FALSE	FALSE	FALSE	FALSE	FALSE	FALSE
Gins2	FALSE	FALSE	FALSE	FALSE	FALSE	FALSE	FALSE	TRUE	FALSE	FALSE	FALSE	FALSE	FALSE	FALSE
Hells	FALSE	FALSE	FALSE	FALSE	FALSE	FALSE	FALSE	TRUE	FALSE	FALSE	FALSE	FALSE	FALSE	FALSE
Rfc5	FALSE	FALSE	FALSE	FALSE	FALSE	FALSE	FALSE	TRUE	FALSE	FALSE	FALSE	FALSE	FALSE	FALSE
Cdt1	FALSE	FALSE	FALSE	FALSE	FALSE	FALSE	FALSE	TRUE	FALSE	FALSE	FALSE	FALSE	FALSE	FALSE
Fabp5	FALSE	FALSE	FALSE	FALSE	FALSE	FALSE	FALSE	TRUE	FALSE	FALSE	FALSE	FALSE	FALSE	FALSE
Orc6	FALSE	FALSE	FALSE	FALSE	FALSE	FALSE	FALSE	TRUE	FALSE	FALSE	FALSE	FALSE	FALSE	FALSE
Ssrp1	FALSE	FALSE	FALSE	FALSE	FALSE	FALSE	FALSE	TRUE	FALSE	FALSE	FALSE	FALSE	FALSE	FALSE
E2f1	FALSE	FALSE	FALSE	FALSE	FALSE	FALSE	FALSE	TRUE	FALSE	FALSE	FALSE	FALSE	FALSE	FALSE
Paics	FALSE	FALSE	FALSE	FALSE	FALSE	FALSE	FALSE	TRUE	FALSE	FALSE	FALSE	FALSE	FALSE	FALSE
Ppil1	FALSE	FALSE	FALSE	FALSE	FALSE	FALSE	FALSE	TRUE	FALSE	FALSE	FALSE	FALSE	FALSE	FALSE
Mcm4	FALSE	FALSE	FALSE	FALSE	FALSE	FALSE	FALSE	TRUE	FALSE	FALSE	FALSE	FALSE	FALSE	FALSE
Sdf2l1	FALSE	FALSE	FALSE	FALSE	FALSE	FALSE	FALSE	TRUE	FALSE	FALSE	FALSE	FALSE	FALSE	TRUE
Rbbp7	FALSE	FALSE	FALSE	FALSE	FALSE	FALSE	FALSE	TRUE	FALSE	FALSE	FALSE	FALSE	FALSE	FALSE
Ung	FALSE	FALSE	FALSE	FALSE	FALSE	FALSE	FALSE	TRUE	FALSE	FALSE	FALSE	FALSE	FALSE	FALSE
Rpa1	FALSE	FALSE	FALSE	FALSE	FALSE	FALSE	FALSE	TRUE	FALSE	FALSE	FALSE	FALSE	FALSE	FALSE
Pola1	FALSE	FALSE	FALSE	FALSE	FALSE	FALSE	FALSE	TRUE	FALSE	FALSE	FALSE	FALSE	FALSE	FALSE
Pold2	FALSE	FALSE	FALSE	FALSE	FALSE	FALSE	FALSE	TRUE	FALSE	FALSE	FALSE	FALSE	FALSE	FALSE
Cbx5	FALSE	FALSE	FALSE	FALSE	FALSE	FALSE	FALSE	TRUE	FALSE	FALSE	FALSE	FALSE	FALSE	FALSE
Shmt1	FALSE	FALSE	FALSE	FALSE	FALSE	FALSE	FALSE	TRUE	FALSE	FALSE	FALSE	FALSE	FALSE	FALSE
Ftl1	FALSE	FALSE	FALSE	FALSE	FALSE	FALSE	FALSE	FALSE	TRUE	FALSE	TRUE	FALSE	FALSE	FALSE
Cd63	FALSE	FALSE	FALSE	FALSE	FALSE	FALSE	FALSE	FALSE	TRUE	FALSE	FALSE	FALSE	FALSE	FALSE
Apoe	FALSE	FALSE	FALSE	FALSE	FALSE	FALSE	FALSE	FALSE	TRUE	FALSE	FALSE	FALSE	FALSE	FALSE
Meis1	FALSE	FALSE	FALSE	FALSE	FALSE	FALSE	FALSE	FALSE	TRUE	FALSE	FALSE	FALSE	FALSE	FALSE
Mpl	FALSE	FALSE	FALSE	FALSE	FALSE	FALSE	FALSE	FALSE	TRUE	FALSE	FALSE	FALSE	FALSE	FALSE
Rbp1	FALSE	FALSE	FALSE	FALSE	FALSE	FALSE	FALSE	FALSE	TRUE	FALSE	FALSE	FALSE	FALSE	FALSE
Map1lc3b	FALSE	FALSE	FALSE	FALSE	FALSE	FALSE	FALSE	FALSE	TRUE	FALSE	FALSE	FALSE	FALSE	FALSE
Car2	FALSE	FALSE	FALSE	FALSE	FALSE	FALSE	FALSE	FALSE	TRUE	FALSE	FALSE	FALSE	FALSE	FALSE
Vamp5	FALSE	FALSE	FALSE	FALSE	FALSE	FALSE	FALSE	FALSE	TRUE	FALSE	FALSE	FALSE	FALSE	FALSE
Mecom	FALSE	FALSE	FALSE	FALSE	FALSE	FALSE	FALSE	FALSE	TRUE	FALSE	FALSE	FALSE	FALSE	FALSE
Angpt1	FALSE	FALSE	FALSE	FALSE	FALSE	FALSE	FALSE	FALSE	TRUE	FALSE	FALSE	FALSE	FALSE	FALSE
Rab38	FALSE	FALSE	FALSE	FALSE	FALSE	FALSE	FALSE	FALSE	TRUE	FALSE	FALSE	FALSE	FALSE	FALSE
Krt18	FALSE	FALSE	FALSE	FALSE	FALSE	FALSE	FALSE	FALSE	TRUE	FALSE	FALSE	FALSE	FALSE	FALSE
Pbx1	FALSE	FALSE	FALSE	FALSE	FALSE	FALSE	FALSE	FALSE	TRUE	FALSE	FALSE	FALSE	FALSE	FALSE
Myl6	FALSE	FALSE	FALSE	FALSE	FALSE	FALSE	FALSE	FALSE	TRUE	FALSE	FALSE	FALSE	FALSE	TRUE
Ldhb	FALSE	FALSE	FALSE	FALSE	FALSE	FALSE	FALSE	FALSE	TRUE	FALSE	FALSE	FALSE	FALSE	FALSE
Gm19590	FALSE	FALSE	FALSE	FALSE	FALSE	FALSE	FALSE	FALSE	TRUE	FALSE	FALSE	FALSE	FALSE	FALSE
Selenow	FALSE	FALSE	FALSE	FALSE	FALSE	FALSE	FALSE	FALSE	TRUE	FALSE	FALSE	FALSE	FALSE	FALSE
Vamp8	FALSE	FALSE	FALSE	FALSE	FALSE	FALSE	FALSE	FALSE	TRUE	FALSE	FALSE	FALSE	FALSE	FALSE
Gata2	FALSE	FALSE	FALSE	FALSE	FALSE	FALSE	FALSE	FALSE	TRUE	FALSE	FALSE	FALSE	FALSE	FALSE
Zfp36l2	FALSE	FALSE	FALSE	FALSE	FALSE	FALSE	FALSE	FALSE	TRUE	FALSE	FALSE	FALSE	FALSE	FALSE
Ctsl	FALSE	FALSE	FALSE	FALSE	FALSE	FALSE	FALSE	FALSE	TRUE	FALSE	FALSE	FALSE	FALSE	FALSE
Ube2c	FALSE	FALSE	FALSE	FALSE	FALSE	FALSE	FALSE	FALSE	FALSE	TRUE	FALSE	FALSE	TRUE	FALSE
Hmmr	FALSE	FALSE	FALSE	FALSE	FALSE	FALSE	FALSE	FALSE	FALSE	TRUE	FALSE	FALSE	FALSE	FALSE
Bub1b	FALSE	FALSE	FALSE	FALSE	FALSE	FALSE	FALSE	FALSE	FALSE	TRUE	FALSE	FALSE	FALSE	FALSE
Kif22	FALSE	FALSE	FALSE	FALSE	FALSE	FALSE	FALSE	FALSE	FALSE	TRUE	FALSE	FALSE	FALSE	FALSE
Arl6ip1	FALSE	FALSE	FALSE	FALSE	FALSE	FALSE	FALSE	FALSE	FALSE	TRUE	FALSE	FALSE	FALSE	FALSE
Mis18bp1	FALSE	FALSE	FALSE	FALSE	FALSE	FALSE	FALSE	FALSE	FALSE	TRUE	FALSE	FALSE	FALSE	FALSE
Incenp	FALSE	FALSE	FALSE	FALSE	FALSE	FALSE	FALSE	FALSE	FALSE	TRUE	FALSE	FALSE	FALSE	FALSE
Pimreg	FALSE	FALSE	FALSE	FALSE	FALSE	FALSE	FALSE	FALSE	FALSE	TRUE	FALSE	FALSE	FALSE	FALSE
Ccnb1	FALSE	FALSE	FALSE	FALSE	FALSE	FALSE	FALSE	FALSE	FALSE	TRUE	FALSE	FALSE	FALSE	FALSE
Jpt1	FALSE	FALSE	FALSE	FALSE	FALSE	FALSE	FALSE	FALSE	FALSE	TRUE	FALSE	FALSE	FALSE	FALSE
Kif23	FALSE	FALSE	FALSE	FALSE	FALSE	FALSE	FALSE	FALSE	FALSE	TRUE	FALSE	FALSE	FALSE	FALSE
Ckap5	FALSE	FALSE	FALSE	FALSE	FALSE	FALSE	FALSE	FALSE	FALSE	TRUE	FALSE	FALSE	FALSE	FALSE
Calm2	FALSE	FALSE	FALSE	FALSE	FALSE	FALSE	FALSE	FALSE	FALSE	TRUE	FALSE	FALSE	FALSE	FALSE
Bub3	FALSE	FALSE	FALSE	FALSE	FALSE	FALSE	FALSE	FALSE	FALSE	TRUE	FALSE	FALSE	FALSE	FALSE
Aspm	FALSE	FALSE	FALSE	FALSE	FALSE	FALSE	FALSE	FALSE	FALSE	TRUE	FALSE	FALSE	FALSE	FALSE
Tacc3	FALSE	FALSE	FALSE	FALSE	FALSE	FALSE	FALSE	FALSE	FALSE	TRUE	FALSE	FALSE	FALSE	FALSE
Ubb	FALSE	FALSE	FALSE	FALSE	FALSE	FALSE	FALSE	FALSE	FALSE	TRUE	FALSE	FALSE	FALSE	FALSE
Spc25	FALSE	FALSE	FALSE	FALSE	FALSE	FALSE	FALSE	FALSE	FALSE	TRUE	FALSE	FALSE	FALSE	FALSE
Plk1	FALSE	FALSE	FALSE	FALSE	FALSE	FALSE	FALSE	FALSE	FALSE	TRUE	FALSE	FALSE	FALSE	FALSE
Cdkn3	FALSE	FALSE	FALSE	FALSE	FALSE	FALSE	FALSE	FALSE	FALSE	TRUE	FALSE	FALSE	FALSE	FALSE
Hist1h1b	FALSE	FALSE	FALSE	FALSE	FALSE	FALSE	FALSE	FALSE	FALSE	TRUE	FALSE	FALSE	FALSE	FALSE
Hjurp	FALSE	FALSE	FALSE	FALSE	FALSE	FALSE	FALSE	FALSE	FALSE	TRUE	FALSE	FALSE	FALSE	FALSE
Tuba1c	FALSE	FALSE	FALSE	FALSE	FALSE	FALSE	FALSE	FALSE	FALSE	TRUE	FALSE	FALSE	FALSE	FALSE
Cit	FALSE	FALSE	FALSE	FALSE	FALSE	FALSE	FALSE	FALSE	FALSE	TRUE	FALSE	FALSE	FALSE	FALSE
Anp32e	FALSE	FALSE	FALSE	FALSE	FALSE	FALSE	FALSE	FALSE	FALSE	TRUE	FALSE	FALSE	FALSE	FALSE
Aurka	FALSE	FALSE	FALSE	FALSE	FALSE	FALSE	FALSE	FALSE	FALSE	TRUE	FALSE	FALSE	FALSE	FALSE
Rad21	FALSE	FALSE	FALSE	FALSE	FALSE	FALSE	FALSE	FALSE	FALSE	TRUE	FALSE	FALSE	FALSE	FALSE
Ckap2	FALSE	FALSE	FALSE	FALSE	FALSE	FALSE	FALSE	FALSE	FALSE	TRUE	FALSE	FALSE	FALSE	FALSE
Kif20a	FALSE	FALSE	FALSE	FALSE	FALSE	FALSE	FALSE	FALSE	FALSE	TRUE	FALSE	FALSE	FALSE	FALSE
Kif4	FALSE	FALSE	FALSE	FALSE	FALSE	FALSE	FALSE	FALSE	FALSE	TRUE	FALSE	FALSE	FALSE	FALSE
Dlgap5	FALSE	FALSE	FALSE	FALSE	FALSE	FALSE	FALSE	FALSE	FALSE	TRUE	FALSE	FALSE	FALSE	FALSE
Bub1	FALSE	FALSE	FALSE	FALSE	FALSE	FALSE	FALSE	FALSE	FALSE	TRUE	FALSE	FALSE	FALSE	FALSE
Cdca2	FALSE	FALSE	FALSE	FALSE	FALSE	FALSE	FALSE	FALSE	FALSE	TRUE	FALSE	FALSE	FALSE	FALSE
Ect2	FALSE	FALSE	FALSE	FALSE	FALSE	FALSE	FALSE	FALSE	FALSE	TRUE	FALSE	FALSE	FALSE	FALSE
Dbf4	FALSE	FALSE	FALSE	FALSE	FALSE	FALSE	FALSE	FALSE	FALSE	TRUE	FALSE	FALSE	FALSE	FALSE
Hist1h2ap	FALSE	FALSE	FALSE	FALSE	FALSE	FALSE	FALSE	FALSE	FALSE	TRUE	FALSE	FALSE	FALSE	FALSE
Psrc1	FALSE	FALSE	FALSE	FALSE	FALSE	FALSE	FALSE	FALSE	FALSE	TRUE	FALSE	FALSE	FALSE	FALSE
Nde1	FALSE	FALSE	FALSE	FALSE	FALSE	FALSE	FALSE	FALSE	FALSE	TRUE	FALSE	FALSE	FALSE	FALSE
Ndc80	FALSE	FALSE	FALSE	FALSE	FALSE	FALSE	FALSE	FALSE	FALSE	TRUE	FALSE	FALSE	FALSE	FALSE
Ncapg	FALSE	FALSE	FALSE	FALSE	FALSE	FALSE	FALSE	FALSE	FALSE	TRUE	FALSE	FALSE	FALSE	FALSE
Spag5	FALSE	FALSE	FALSE	FALSE	FALSE	FALSE	FALSE	FALSE	FALSE	TRUE	FALSE	FALSE	FALSE	FALSE
Cep55	FALSE	FALSE	FALSE	FALSE	FALSE	FALSE	FALSE	FALSE	FALSE	TRUE	FALSE	FALSE	FALSE	FALSE
Kif2c	FALSE	FALSE	FALSE	FALSE	FALSE	FALSE	FALSE	FALSE	FALSE	TRUE	FALSE	FALSE	FALSE	FALSE
Sgo2a	FALSE	FALSE	FALSE	FALSE	FALSE	FALSE	FALSE	FALSE	FALSE	TRUE	FALSE	FALSE	FALSE	FALSE
Rangap1	FALSE	FALSE	FALSE	FALSE	FALSE	FALSE	FALSE	FALSE	FALSE	TRUE	FALSE	FALSE	FALSE	FALSE
Cdc25b	FALSE	FALSE	FALSE	FALSE	FALSE	FALSE	FALSE	FALSE	FALSE	TRUE	FALSE	FALSE	FALSE	FALSE
Sgo1	FALSE	FALSE	FALSE	FALSE	FALSE	FALSE	FALSE	FALSE	FALSE	TRUE	FALSE	FALSE	FALSE	FALSE
Reep4	FALSE	FALSE	FALSE	FALSE	FALSE	FALSE	FALSE	FALSE	FALSE	TRUE	FALSE	FALSE	FALSE	FALSE
Cdca5	FALSE	FALSE	FALSE	FALSE	FALSE	FALSE	FALSE	FALSE	FALSE	TRUE	FALSE	FALSE	FALSE	FALSE
Gm10076	FALSE	FALSE	FALSE	FALSE	FALSE	FALSE	FALSE	FALSE	FALSE	FALSE	TRUE	FALSE	FALSE	FALSE
Ninj1	FALSE	FALSE	FALSE	FALSE	FALSE	FALSE	FALSE	FALSE	FALSE	FALSE	TRUE	FALSE	FALSE	FALSE
Bcl2l11	FALSE	FALSE	FALSE	FALSE	FALSE	FALSE	FALSE	FALSE	FALSE	FALSE	TRUE	FALSE	FALSE	FALSE
Srgn	FALSE	FALSE	FALSE	FALSE	FALSE	FALSE	FALSE	FALSE	FALSE	FALSE	TRUE	FALSE	FALSE	FALSE
Fth1	FALSE	FALSE	FALSE	FALSE	FALSE	FALSE	FALSE	FALSE	FALSE	FALSE	TRUE	FALSE	FALSE	FALSE
Uba52	FALSE	FALSE	FALSE	FALSE	FALSE	FALSE	FALSE	FALSE	FALSE	FALSE	TRUE	FALSE	FALSE	FALSE
Cables1	FALSE	FALSE	FALSE	FALSE	FALSE	FALSE	FALSE	FALSE	FALSE	FALSE	TRUE	FALSE	FALSE	FALSE
Akap13	FALSE	FALSE	FALSE	FALSE	FALSE	FALSE	FALSE	FALSE	FALSE	FALSE	TRUE	FALSE	FALSE	FALSE
Smim3	FALSE	FALSE	FALSE	FALSE	FALSE	FALSE	FALSE	FALSE	FALSE	FALSE	TRUE	FALSE	FALSE	FALSE
B3gnt5	FALSE	FALSE	FALSE	FALSE	FALSE	FALSE	FALSE	FALSE	FALSE	FALSE	TRUE	FALSE	FALSE	FALSE
Selplg	FALSE	FALSE	FALSE	FALSE	FALSE	FALSE	FALSE	FALSE	FALSE	FALSE	TRUE	FALSE	FALSE	FALSE
Runx2	FALSE	FALSE	FALSE	FALSE	FALSE	FALSE	FALSE	FALSE	FALSE	FALSE	TRUE	FALSE	FALSE	FALSE
1700017B05Rik	FALSE	FALSE	FALSE	FALSE	FALSE	FALSE	FALSE	FALSE	FALSE	FALSE	TRUE	FALSE	FALSE	FALSE
Ifitm2	FALSE	FALSE	FALSE	FALSE	FALSE	FALSE	FALSE	FALSE	FALSE	FALSE	TRUE	FALSE	FALSE	FALSE
Rasa2	FALSE	FALSE	FALSE	FALSE	FALSE	FALSE	FALSE	FALSE	FALSE	FALSE	TRUE	FALSE	FALSE	FALSE
Rab4a	FALSE	FALSE	FALSE	FALSE	FALSE	FALSE	FALSE	FALSE	FALSE	FALSE	TRUE	FALSE	FALSE	FALSE
Card19	FALSE	FALSE	FALSE	FALSE	FALSE	FALSE	FALSE	FALSE	FALSE	FALSE	TRUE	FALSE	FALSE	FALSE
Emb	FALSE	FALSE	FALSE	FALSE	FALSE	FALSE	FALSE	FALSE	FALSE	FALSE	TRUE	FALSE	FALSE	FALSE
Zyx	FALSE	FALSE	FALSE	FALSE	FALSE	FALSE	FALSE	FALSE	FALSE	FALSE	TRUE	FALSE	FALSE	FALSE
mt-Nd4	FALSE	FALSE	FALSE	FALSE	FALSE	FALSE	FALSE	FALSE	FALSE	FALSE	TRUE	FALSE	FALSE	FALSE
Tmsb10	FALSE	FALSE	FALSE	FALSE	FALSE	FALSE	FALSE	FALSE	FALSE	FALSE	TRUE	FALSE	FALSE	FALSE
Nceh1	FALSE	FALSE	FALSE	FALSE	FALSE	FALSE	FALSE	FALSE	FALSE	FALSE	TRUE	FALSE	FALSE	FALSE
Gpr65	FALSE	FALSE	FALSE	FALSE	FALSE	FALSE	FALSE	FALSE	FALSE	FALSE	TRUE	FALSE	FALSE	FALSE
Jdp2	FALSE	FALSE	FALSE	FALSE	FALSE	FALSE	FALSE	FALSE	FALSE	FALSE	TRUE	FALSE	FALSE	FALSE
H3f3a	FALSE	FALSE	FALSE	FALSE	FALSE	FALSE	FALSE	FALSE	FALSE	FALSE	TRUE	FALSE	FALSE	FALSE
Msi2	FALSE	FALSE	FALSE	FALSE	FALSE	FALSE	FALSE	FALSE	FALSE	FALSE	TRUE	FALSE	FALSE	FALSE
Abhd17b	FALSE	FALSE	FALSE	FALSE	FALSE	FALSE	FALSE	FALSE	FALSE	FALSE	TRUE	FALSE	FALSE	FALSE
Tnrc18	FALSE	FALSE	FALSE	FALSE	FALSE	FALSE	FALSE	FALSE	FALSE	FALSE	TRUE	FALSE	FALSE	FALSE
Fam69b	FALSE	FALSE	FALSE	FALSE	FALSE	FALSE	FALSE	FALSE	FALSE	FALSE	TRUE	FALSE	FALSE	FALSE
P2ry10	FALSE	FALSE	FALSE	FALSE	FALSE	FALSE	FALSE	FALSE	FALSE	FALSE	TRUE	FALSE	FALSE	FALSE
Tgfb1	FALSE	FALSE	FALSE	FALSE	FALSE	FALSE	FALSE	FALSE	FALSE	FALSE	TRUE	FALSE	FALSE	FALSE
mt-Cytb	FALSE	FALSE	FALSE	FALSE	FALSE	FALSE	FALSE	FALSE	FALSE	FALSE	TRUE	FALSE	FALSE	FALSE
Pan3	FALSE	FALSE	FALSE	FALSE	FALSE	FALSE	FALSE	FALSE	FALSE	FALSE	TRUE	FALSE	FALSE	FALSE
mt-Nd5	FALSE	FALSE	FALSE	FALSE	FALSE	FALSE	FALSE	FALSE	FALSE	FALSE	TRUE	FALSE	FALSE	FALSE
Cd69	FALSE	FALSE	FALSE	FALSE	FALSE	FALSE	FALSE	FALSE	FALSE	FALSE	FALSE	TRUE	TRUE	FALSE
Ifi204	FALSE	FALSE	FALSE	FALSE	FALSE	FALSE	FALSE	FALSE	FALSE	FALSE	FALSE	TRUE	TRUE	FALSE
Icam1	FALSE	FALSE	FALSE	FALSE	FALSE	FALSE	FALSE	FALSE	FALSE	FALSE	FALSE	TRUE	TRUE	FALSE
Bcl3	FALSE	FALSE	FALSE	FALSE	FALSE	FALSE	FALSE	FALSE	FALSE	FALSE	FALSE	TRUE	TRUE	FALSE
Ccnd2	FALSE	FALSE	FALSE	FALSE	FALSE	FALSE	FALSE	FALSE	FALSE	FALSE	FALSE	TRUE	FALSE	FALSE
Ccl4	FALSE	FALSE	FALSE	FALSE	FALSE	FALSE	FALSE	FALSE	FALSE	FALSE	FALSE	TRUE	FALSE	FALSE
Ccrl2	FALSE	FALSE	FALSE	FALSE	FALSE	FALSE	FALSE	FALSE	FALSE	FALSE	FALSE	TRUE	FALSE	FALSE
Ifi206	FALSE	FALSE	FALSE	FALSE	FALSE	FALSE	FALSE	FALSE	FALSE	FALSE	FALSE	TRUE	TRUE	FALSE
Gadd45b	FALSE	FALSE	FALSE	FALSE	FALSE	FALSE	FALSE	FALSE	FALSE	FALSE	FALSE	TRUE	TRUE	FALSE
Relb	FALSE	FALSE	FALSE	FALSE	FALSE	FALSE	FALSE	FALSE	FALSE	FALSE	FALSE	TRUE	TRUE	FALSE
Tnip3	FALSE	FALSE	FALSE	FALSE	FALSE	FALSE	FALSE	FALSE	FALSE	FALSE	FALSE	TRUE	FALSE	FALSE
Tyrobp	FALSE	FALSE	FALSE	FALSE	FALSE	FALSE	FALSE	FALSE	FALSE	FALSE	FALSE	FALSE	FALSE	TRUE
Ap3s1	FALSE	FALSE	FALSE	FALSE	FALSE	FALSE	FALSE	FALSE	FALSE	FALSE	FALSE	FALSE	FALSE	TRUE
Lgals1	FALSE	FALSE	FALSE	FALSE	FALSE	FALSE	FALSE	FALSE	FALSE	FALSE	FALSE	FALSE	FALSE	TRUE
Tspo	FALSE	FALSE	FALSE	FALSE	FALSE	FALSE	FALSE	FALSE	FALSE	FALSE	FALSE	FALSE	FALSE	TRUE
Fcer1g	FALSE	FALSE	FALSE	FALSE	FALSE	FALSE	FALSE	FALSE	FALSE	FALSE	FALSE	FALSE	FALSE	TRUE
Clec12a	FALSE	FALSE	FALSE	FALSE	FALSE	FALSE	FALSE	FALSE	FALSE	FALSE	FALSE	FALSE	FALSE	TRUE
Ctsg	FALSE	FALSE	FALSE	FALSE	FALSE	FALSE	FALSE	FALSE	FALSE	FALSE	FALSE	FALSE	FALSE	TRUE
Rab44	FALSE	FALSE	FALSE	FALSE	FALSE	FALSE	FALSE	FALSE	FALSE	FALSE	FALSE	FALSE	FALSE	TRUE
Gng12	FALSE	FALSE	FALSE	FALSE	FALSE	FALSE	FALSE	FALSE	FALSE	FALSE	FALSE	FALSE	FALSE	TRUE
Hsp90b1	FALSE	FALSE	FALSE	FALSE	FALSE	FALSE	FALSE	FALSE	FALSE	FALSE	FALSE	FALSE	FALSE	TRUE
Fcgr3	FALSE	FALSE	FALSE	FALSE	FALSE	FALSE	FALSE	FALSE	FALSE	FALSE	FALSE	FALSE	FALSE	TRUE
Cebpa	FALSE	FALSE	FALSE	FALSE	FALSE	FALSE	FALSE	FALSE	FALSE	FALSE	FALSE	FALSE	FALSE	TRUE
Alox5ap	FALSE	FALSE	FALSE	FALSE	FALSE	FALSE	FALSE	FALSE	FALSE	FALSE	FALSE	FALSE	FALSE	TRUE
Cst7	FALSE	FALSE	FALSE	FALSE	FALSE	FALSE	FALSE	FALSE	FALSE	FALSE	FALSE	FALSE	FALSE	TRUE
Hdc	FALSE	FALSE	FALSE	FALSE	FALSE	FALSE	FALSE	FALSE	FALSE	FALSE	FALSE	FALSE	FALSE	TRUE
Ssr4	FALSE	FALSE	FALSE	FALSE	FALSE	FALSE	FALSE	FALSE	FALSE	FALSE	FALSE	FALSE	FALSE	TRUE
Cst3	FALSE	FALSE	FALSE	FALSE	FALSE	FALSE	FALSE	FALSE	FALSE	FALSE	FALSE	FALSE	FALSE	TRUE
Msrb1	FALSE	FALSE	FALSE	FALSE	FALSE	FALSE	FALSE	FALSE	FALSE	FALSE	FALSE	FALSE	FALSE	TRUE
Atp8b4	FALSE	FALSE	FALSE	FALSE	FALSE	FALSE	FALSE	FALSE	FALSE	FALSE	FALSE	FALSE	FALSE	TRUE
Fcgr2b	FALSE	FALSE	FALSE	FALSE	FALSE	FALSE	FALSE	FALSE	FALSE	FALSE	FALSE	FALSE	FALSE	TRUE
Pdia6	FALSE	FALSE	FALSE	FALSE	FALSE	FALSE	FALSE	FALSE	FALSE	FALSE	FALSE	FALSE	FALSE	TRUE
Mcpt8	FALSE	FALSE	FALSE	FALSE	FALSE	FALSE	FALSE	FALSE	FALSE	FALSE	FALSE	FALSE	FALSE	TRUE
Pdia3	FALSE	FALSE	FALSE	FALSE	FALSE	FALSE	FALSE	FALSE	FALSE	FALSE	FALSE	FALSE	FALSE	TRUE
Gsr	FALSE	FALSE	FALSE	FALSE	FALSE	FALSE	FALSE	FALSE	FALSE	FALSE	FALSE	FALSE	FALSE	TRUE
Sh3bgrl3	FALSE	FALSE	FALSE	FALSE	FALSE	FALSE	FALSE	FALSE	FALSE	FALSE	FALSE	FALSE	FALSE	TRUE
Mpo	FALSE	FALSE	FALSE	FALSE	FALSE	FALSE	FALSE	FALSE	FALSE	FALSE	FALSE	FALSE	FALSE	TRUE
Cyba	FALSE	FALSE	FALSE	FALSE	FALSE	FALSE	FALSE	FALSE	FALSE	FALSE	FALSE	FALSE	FALSE	TRUE
Serf2	FALSE	FALSE	FALSE	FALSE	FALSE	FALSE	FALSE	FALSE	FALSE	FALSE	FALSE	FALSE	FALSE	TRUE
Anxa1	FALSE	FALSE	FALSE	FALSE	FALSE	FALSE	FALSE	FALSE	FALSE	FALSE	FALSE	FALSE	FALSE	TRUE
Npc2	FALSE	FALSE	FALSE	FALSE	FALSE	FALSE	FALSE	FALSE	FALSE	FALSE	FALSE	FALSE	FALSE	TRUE
Ctsz	FALSE	FALSE	FALSE	FALSE	FALSE	FALSE	FALSE	FALSE	FALSE	FALSE	FALSE	FALSE	FALSE	TRUE
Anxa2	FALSE	FALSE	FALSE	FALSE	FALSE	FALSE	FALSE	FALSE	FALSE	FALSE	FALSE	FALSE	FALSE	TRUE
Sec61g	FALSE	FALSE	FALSE	FALSE	FALSE	FALSE	FALSE	FALSE	FALSE	FALSE	FALSE	FALSE	FALSE	TRUE
Itm2c	FALSE	FALSE	FALSE	FALSE	FALSE	FALSE	FALSE	FALSE	FALSE	FALSE	FALSE	FALSE	FALSE	TRUE
Manf	FALSE	FALSE	FALSE	FALSE	FALSE	FALSE	FALSE	FALSE	FALSE	FALSE	FALSE	FALSE	FALSE	TRUE
Actr3	FALSE	FALSE	FALSE	FALSE	FALSE	FALSE	FALSE	FALSE	FALSE	FALSE	FALSE	FALSE	FALSE	TRUE
Ms4a3	FALSE	FALSE	FALSE	FALSE	FALSE	FALSE	FALSE	FALSE	FALSE	FALSE	FALSE	FALSE	FALSE	TRUE
Ppib	FALSE	FALSE	FALSE	FALSE	FALSE	FALSE	FALSE	FALSE	FALSE	FALSE	FALSE	FALSE	FALSE	TRUE
Lgals3	FALSE	FALSE	FALSE	FALSE	FALSE	FALSE	FALSE	FALSE	FALSE	FALSE	FALSE	FALSE	FALSE	TRUE
Il3ra	FALSE	FALSE	FALSE	FALSE	FALSE	FALSE	FALSE	FALSE	FALSE	FALSE	FALSE	FALSE	FALSE	TRUE
Itgb7	FALSE	FALSE	FALSE	FALSE	FALSE	FALSE	FALSE	FALSE	FALSE	FALSE	FALSE	FALSE	FALSE	TRUE
Hvcn1	FALSE	FALSE	FALSE	FALSE	FALSE	FALSE	FALSE	FALSE	FALSE	FALSE	FALSE	FALSE	FALSE	TRUE
Atp6ap2	FALSE	FALSE	FALSE	FALSE	FALSE	FALSE	FALSE	FALSE	FALSE	FALSE	FALSE	FALSE	FALSE	TRUE
Cd9	FALSE	FALSE	FALSE	FALSE	FALSE	FALSE	FALSE	FALSE	FALSE	FALSE	FALSE	FALSE	FALSE	TRUE
Napsa	FALSE	FALSE	FALSE	FALSE	FALSE	FALSE	FALSE	FALSE	FALSE	FALSE	FALSE	FALSE	FALSE	TRUE
Reep5	FALSE	FALSE	FALSE	FALSE	FALSE	FALSE	FALSE	FALSE	FALSE	FALSE	FALSE	FALSE	FALSE	TRUE
Ostf1	FALSE	FALSE	FALSE	FALSE	FALSE	FALSE	FALSE	FALSE	FALSE	FALSE	FALSE	FALSE	FALSE	TRUE
Erp29	FALSE	FALSE	FALSE	FALSE	FALSE	FALSE	FALSE	FALSE	FALSE	FALSE	FALSE	FALSE	FALSE	TRUE
Ccl9	FALSE	FALSE	FALSE	FALSE	FALSE	FALSE	FALSE	FALSE	FALSE	FALSE	FALSE	FALSE	FALSE	TRUE
Cpa3	FALSE	FALSE	FALSE	FALSE	FALSE	FALSE	FALSE	FALSE	FALSE	FALSE	FALSE	FALSE	FALSE	TRUE
Emilin2	FALSE	FALSE	FALSE	FALSE	FALSE	FALSE	FALSE	FALSE	FALSE	FALSE	FALSE	FALSE	FALSE	TRUE
Man2b1	FALSE	FALSE	FALSE	FALSE	FALSE	FALSE	FALSE	FALSE	FALSE	FALSE	FALSE	FALSE	FALSE	TRUE
Fam46a	FALSE	FALSE	FALSE	FALSE	FALSE	FALSE	FALSE	FALSE	FALSE	FALSE	FALSE	FALSE	FALSE	TRUE
Fam129a	FALSE	FALSE	FALSE	FALSE	FALSE	FALSE	FALSE	FALSE	FALSE	FALSE	FALSE	FALSE	FALSE	TRUE
Slpi	FALSE	FALSE	FALSE	FALSE	FALSE	FALSE	FALSE	FALSE	FALSE	FALSE	FALSE	FALSE	FALSE	TRUE
Gm2a	FALSE	FALSE	FALSE	FALSE	FALSE	FALSE	FALSE	FALSE	FALSE	FALSE	FALSE	FALSE	FALSE	TRUE
Cotl1	FALSE	FALSE	FALSE	FALSE	FALSE	FALSE	FALSE	FALSE	FALSE	FALSE	FALSE	FALSE	FALSE	TRUE
Itgb2	FALSE	FALSE	FALSE	FALSE	FALSE	FALSE	FALSE	FALSE	FALSE	FALSE	FALSE	FALSE	FALSE	TRUE
Gpi1	FALSE	FALSE	FALSE	FALSE	FALSE	FALSE	FALSE	FALSE	FALSE	FALSE	FALSE	FALSE	FALSE	TRUE
1700020L24Rik	FALSE	FALSE	FALSE	FALSE	FALSE	FALSE	FALSE	FALSE	FALSE	FALSE	FALSE	FALSE	FALSE	TRUE
Tmed3	FALSE	FALSE	FALSE	FALSE	FALSE	FALSE	FALSE	FALSE	FALSE	FALSE	FALSE	FALSE	FALSE	TRUE
Nkg7	FALSE	FALSE	FALSE	FALSE	FALSE	FALSE	FALSE	FALSE	FALSE	FALSE	FALSE	FALSE	FALSE	TRUE
Sec11c	FALSE	FALSE	FALSE	FALSE	FALSE	FALSE	FALSE	FALSE	FALSE	FALSE	FALSE	FALSE	FALSE	TRUE
Csf2rb	FALSE	FALSE	FALSE	FALSE	FALSE	FALSE	FALSE	FALSE	FALSE	FALSE	FALSE	FALSE	FALSE	TRUE
Lmo4	FALSE	FALSE	FALSE	FALSE	FALSE	FALSE	FALSE	FALSE	FALSE	FALSE	FALSE	FALSE	FALSE	TRUE
Cdk2ap2	FALSE	FALSE	FALSE	FALSE	FALSE	FALSE	FALSE	FALSE	FALSE	FALSE	FALSE	FALSE	FALSE	TRUE
Anxa3	FALSE	FALSE	FALSE	FALSE	FALSE	FALSE	FALSE	FALSE	FALSE	FALSE	FALSE	FALSE	FALSE	TRUE
Pfkp	FALSE	FALSE	FALSE	FALSE	FALSE	FALSE	FALSE	FALSE	FALSE	FALSE	FALSE	FALSE	FALSE	TRUE
P4hb	FALSE	FALSE	FALSE	FALSE	FALSE	FALSE	FALSE	FALSE	FALSE	FALSE	FALSE	FALSE	FALSE	TRUE
S100a11	FALSE	FALSE	FALSE	FALSE	FALSE	FALSE	FALSE	FALSE	FALSE	FALSE	FALSE	FALSE	FALSE	TRUE
Gpx1	FALSE	FALSE	FALSE	FALSE	FALSE	FALSE	FALSE	FALSE	FALSE	FALSE	FALSE	FALSE	FALSE	TRUE
Arpc1b	FALSE	FALSE	FALSE	FALSE	FALSE	FALSE	FALSE	FALSE	FALSE	FALSE	FALSE	FALSE	FALSE	TRUE
Ms4a2	FALSE	FALSE	FALSE	FALSE	FALSE	FALSE	FALSE	FALSE	FALSE	FALSE	FALSE	FALSE	FALSE	TRUE
Igsf6	FALSE	FALSE	FALSE	FALSE	FALSE	FALSE	FALSE	FALSE	FALSE	FALSE	FALSE	FALSE	FALSE	TRUE
Serp1	FALSE	FALSE	FALSE	FALSE	FALSE	FALSE	FALSE	FALSE	FALSE	FALSE	FALSE	FALSE	FALSE	TRUE
Lman2	FALSE	FALSE	FALSE	FALSE	FALSE	FALSE	FALSE	FALSE	FALSE	FALSE	FALSE	FALSE	FALSE	TRUE
Atox1	FALSE	FALSE	FALSE	FALSE	FALSE	FALSE	FALSE	FALSE	FALSE	FALSE	FALSE	FALSE	FALSE	TRUE
Ankrd12	FALSE	FALSE	FALSE	FALSE	FALSE	FALSE	FALSE	FALSE	FALSE	FALSE	FALSE	FALSE	FALSE	TRUE
Sem1	FALSE	FALSE	FALSE	FALSE	FALSE	FALSE	FALSE	FALSE	FALSE	FALSE	FALSE	FALSE	FALSE	TRUE
Dbi	FALSE	FALSE	FALSE	FALSE	FALSE	FALSE	FALSE	FALSE	FALSE	FALSE	FALSE	FALSE	FALSE	TRUE
Csgalnact2	FALSE	FALSE	FALSE	FALSE	FALSE	FALSE	FALSE	FALSE	FALSE	FALSE	FALSE	FALSE	FALSE	TRUE
Fam49b	FALSE	FALSE	FALSE	FALSE	FALSE	FALSE	FALSE	FALSE	FALSE	FALSE	FALSE	FALSE	FALSE	TRUE
Myl12b	FALSE	FALSE	FALSE	FALSE	FALSE	FALSE	FALSE	FALSE	FALSE	FALSE	FALSE	FALSE	FALSE	TRUE
Lamtor2	FALSE	FALSE	FALSE	FALSE	FALSE	FALSE	FALSE	FALSE	FALSE	FALSE	FALSE	FALSE	FALSE	TRUE
Ddost	FALSE	FALSE	FALSE	FALSE	FALSE	FALSE	FALSE	FALSE	FALSE	FALSE	FALSE	FALSE	FALSE	TRUE
Myo1f	FALSE	FALSE	FALSE	FALSE	FALSE	FALSE	FALSE	FALSE	FALSE	FALSE	FALSE	FALSE	FALSE	TRUE
F630028O10Rik	FALSE	FALSE	FALSE	FALSE	FALSE	FALSE	FALSE	FALSE	FALSE	FALSE	FALSE	FALSE	FALSE	TRUE
