# Supplementary material for: External signals regulate continuous transcriptional states in hematopoietic stem cells
Source: eLife. 2021 Dec 23;10:e66512. doi: 10.7554/eLife.66512 (PMC8700284; doi:10.7554/eLife.66512)
Supplement: Supplementary file 10. — Count normalized and log transformed UMI counts were averaged across cells in LSK clusters for differentially regulated genes from model-based analysis of single-cell transcriptomics (MAST). [file elife-66512-supp10.xlsx]

## Sheet: dmPGE2_1.5
	GCSF_Acute-Activation	GCSF_Cell-cycle	GCSF_Interferon	GCSF_Interferon cell-cycle	GCSF_Metabolism	GCSF_Myeloid	GCSF_Primed	GCSF_Primitive	ct_Acute-Activation	ct_Cell-cycle	ct_Interferon	ct_Metabolism	ct_Myeloid	ct_Primed	ct_Primitive	dmPGE2_Acute-Activation	dmPGE2_Cell-cycle	dmPGE2_Interferon	dmPGE2_Metabolism	dmPGE2_Myeloid	dmPGE2_Primed	dmPGE2_Primitive	indo_Acute-Activation	indo_Cell-cycle	indo_Interferon	indo_Interferon cell-cycle	indo_Metabolism	indo_Myeloid	indo_Primed	indo_Primitive	pIC_Cell-cycle	pIC_Interferon	pIC_Interferon cell-cycle	pIC_Metabolism	pIC_Myeloid	pIC_Primed	pIC_Primitive	specific
1700017B05Rik	0.425001	0.376155	0	0.401521	0.321809	0.211633	0.320721	0.34392	0.365895	0.258212	0.592418	0.305838	0	0.283302	0.303593	0.696658	0.671024	0.32109	0.524532	0.402372	0.624433	0.593765	0.138072	0.285568	0.248633	0	0.309611	0.289339	0.252876	0.31397	0.269621	0.128652	0.161329	0.277521	0.258166	0.241035	0.166491	MPP_only
Abhd17b	0.468933	0.496704	0.209267	0.687225	0.47557	0.0786559	0.656605	0.341445	0.450782	0.322842	0.379251	0.366889	0.227015	0.427909	0.241214	0.859315	0.800479	0	0.675898	0.569414	0.881773	0.541227	0.318806	0.35308	0.347066	0.612356	0.360174	0.0768278	0.414997	0.2594	0.50865	0.973496	0.901225	0.48159	0.39879	0.582622	0.353584	MPP_only
Akap13	0.837248	0.9892	0.561833	0.687225	0.898024	0.618601	1.02555	1.19891	0.959335	1.19398	1.389	1.01647	0.839766	1.22279	1.31753	1.69714	1.62773	0.32109	1.45707	1.06655	1.84189	1.55427	1.22422	1.2243	0.781121	1.13524	0.9976	0.720771	1.16869	1.2864	1.29436	1.04453	1.08735	1.11005	0.823396	1.31613	1.43217	MPP_only
Arid5a	0.3819	0.291403	0.490823	0	0.23909	0.0668846	0.327742	0.240994	0.0901543	0.262637	0.720752	0.236554	0.227015	0.288004	0.216373	0.652567	0.693464	0.32109	0.527842	0.303222	0.521318	0.475942	0	0.314482	0.457306	0	0.217601	0.376496	0.267409	0.253643	0.531574	1.20962	1.23513	0.434612	0.422604	0.494206	0.44711	MPP_only
Aurka	0	0.624583	0	0.401521	0.0826227	0.34669	0.033551	0.0054962	0.116573	0.788586	0	0.13054	0	0.0324138	0.0238366	0.0244555	0.272698	0	0.0774757	0.0402078	0	0.0127859	0	0.728961	0	1.13524	0.143745	0	0.0198789	0.0200773	0.767895	0.0244119	0.426658	0.101926	0.0985443	0.0151998	0.0138195	MPP_only
B3gnt5	0.033547	0.148564	0	0	0.115385	0.0454007	0.0946638	0.133193	0	0.272059	0	0.16574	0	0.160994	0.142809	0.691842	0.682354	0	0.608241	0.457449	0.738617	0.486142	0.373848	0.242313	0.180695	0.612356	0.143431	0	0.134447	0.123708	0.255154	0.208703	0.27101	0.18876	0.085458	0.17286	0.220835	MPP_only
Bcl2l11	0.162888	0.0802376	0.137962	0	0.121748	0.123574	0.145233	0.193323	0.354078	0.0602536	0	0.134384	0	0.108118	0.185287	0.86847	0.895566	0.32109	0.573619	0.436858	0.798225	0.34465	0.180734	0.0975709	0.129766	0	0.115608	0.116523	0.0981375	0.20849	0.0988593	0.299723	0.239709	0.121406	0.0713537	0.125711	0.115733	MPP_only
Cables1	0	0.035385	0	0	0.0305999	0.0384008	0.0464645	0.0512155	0	0.0489155	0	0.0550862	0	0.0823122	0.0692072	0.659718	0.442839	0	0.361519	0.454744	0.397499	0.476683	0.161014	0.0391745	0.0396713	0	0.0521696	0	0.0506009	0.067926	0.0466396	0.0330454	0.027033	0.0458817	0.135798	0.0469822	0.091471	MPP_only
Ccl4	0.457614	0.115159	0.531373	0	0.126581	0.110743	0.214037	0.375397	0.499325	0.204631	0.341502	0.269926	0	0.432555	0.523274	0.600585	0.516482	0	0.405782	0.857475	1.50624	0.48533	0.707267	0.198326	0.554389	0.989372	0.17263	0.116523	0.330398	0.427356	0.474333	2.22814	1.93883	0.47882	0.336963	0.885406	0.740042	MPP_only
Ccnb1	0	1.04166	0	0.401521	0.117965	0.154635	0.0399441	0.0298279	0	1.02806	0	0.15851	0	0.0494021	0.0204159	0.0247416	0.616773	0	0.143218	0.171717	0.0953121	0.0143411	0	1.0729	0.0304697	0.818528	0.180495	0.272657	0.045963	0.0230881	1.08708	0.0326531	0.755493	0.151429	0.197126	0.0362959	0.0245987	MPP_only
Cdc20	0.290758	1.36584	0	0	0.266944	0.562274	0.121798	0.0959365	0.120145	1.44461	0.720752	0.302707	0	0.0767582	0.0708994	0.0586125	0.910321	0	0.19417	0.183998	0.113197	0.0450519	0	1.50801	0.102088	1.73099	0.303638	0.272657	0.0753249	0.0929635	1.39536	0.0930892	0.978012	0.246035	0.270187	0.0920107	0.0859103	MPP_only
Cdc42ep3	0.179934	0.478522	0.178481	0.401521	0.297021	0.381422	0.349369	0.353914	0.731946	0.595428	0.720752	0.459555	0.394895	0.586629	0.529492	0.171792	0.227965	0	0.192708	0.315805	0.323707	0.238161	0.612211	0.629384	0.509081	0.818528	0.432417	0.366305	0.587954	0.597039	0.567768	0.147522	0.226137	0.401536	0.342585	0.47218	0.485246	MPP_only
Cdca2	0.134642	0.61323	0.0783793	0	0.23597	0.287434	0.0555894	0.0343005	0.214084	0.695495	0	0.291611	0.227015	0.0447058	0.0518297	0.0352934	0.335078	0	0.170287	0.130893	0.0189105	0.0148492	0.133236	0.696176	0.126683	0.989372	0.279033	0.0769661	0.052156	0.0272776	0.7773	0.0545994	0.443778	0.266314	0.119523	0.0437172	0.029039	MPP_only
Cdk1	0.0586226	1.43636	0	1.09071	0.848808	0.9515	0.122956	0.0662135	0.12391	1.56524	0	0.887133	0	0.137499	0.100629	0.117944	1.07272	0	0.827772	0.411597	0.071163	0.0607641	0	1.59735	0.390342	1.99277	0.896811	0.584078	0.102142	0.101448	1.54487	0.255895	1.52895	0.833679	0.514973	0.0902123	0.0697314	MPP_only
Cenpe	0.166807	0.978466	0	0	0.164165	0.490794	0.0347423	0.0620233	0	1.1289	0	0.21948	0	0.107779	0.0657329	0.0499912	0.667162	0	0.210106	0.287156	0.101836	0.0434583	0	1.15859	0.128281	1.65324	0.25819	0.400088	0.0780547	0.0744826	1.21218	0.118754	1.05932	0.285619	0.236449	0.104475	0.0370235	MPP_only
Cenpf	0	1.64174	0	0.687225	0.27429	0.377689	0.0335456	0.0482674	0	1.73874	0	0.400266	0	0.0498415	0.027095	0.0459581	1.28498	0	0.344788	0.309187	0	0.0185977	0	1.78409	0.0304697	1.65324	0.325127	0	0.0339279	0.0318167	1.7543	0.0870476	1.24129	0.328838	0.276038	0.078232	0.0490152	MPP_only
Cks2	0.284305	1.94481	0.209267	0.687225	0.795758	1.39869	0.409074	0.31133	0.535292	2.16823	0.341502	0.95174	0.227015	0.403559	0.424092	0.396939	1.59059	0	0.899059	1.30648	0.562463	0.279605	0.629009	2.1549	0.392861	2.4103	0.916257	1.11666	0.375423	0.368839	2.08963	0.520303	1.80769	0.876452	1.26142	0.380281	0.303453	MPP_only
Dusp1	0.777695	0.252094	0.178481	0	0.252863	0.316736	0.229485	1.00685	0.870496	0.544062	0.921783	0.413044	0	0.383736	1.26726	1.03425	0.871163	1.48335	0.784077	1.1219	0.91749	1.44825	1.04502	0.408986	0.795515	0.352336	0.327202	0.5152	0.330269	1.45197	0.458417	0.834457	0.505802	0.414678	0.419533	0.505578	1.31264	MPP_only
Emb	0.998257	1.19968	0.986908	0.90918	1.17855	1.1011	1.2238	0.707851	1.51825	1.22387	1.27794	1.16445	1.25603	1.36964	0.698896	1.56955	1.57052	0	1.29684	1.52921	1.53625	0.980009	0.977072	1.26597	1.01272	2.04875	1.24996	1.8871	1.36038	0.779113	1.31831	0.996806	1.25914	1.28709	1.26619	1.35426	0.828396	MPP_only
Erh	0.80289	0.784077	0.458759	1.24429	0.960725	0.666577	0.696729	0.583047	0.473503	0.551417	0.933919	0.737997	0.991642	0.480526	0.424869	0.844701	0.970643	0	1.26799	0.916448	0.83875	0.567496	0.486597	0.665821	0.731805	0.612356	0.919848	0.908002	0.538759	0.439947	0.630739	0.638335	0.742951	0.934897	0.678702	0.520193	0.401441	MPP_only
Fbxo5	0	0.636032	0	0	0.395404	0.72988	0.0697534	0.0422395	0	0.767877	0	0.448731	0	0.0648383	0.0529277	0.0581479	0.341997	0	0.346473	0.158147	0.134867	0.0258341	0	0.821467	0.101764	1.47684	0.46985	0.538835	0.0729507	0.0412113	0.697601	0.090111	0.363166	0.391207	0.0825922	0.0503119	0.0256117	MPP_only
Gm10076	0.654801	0.759188	0.49396	0.401521	0.788066	1.0052	0.756974	0.684121	0.627456	0.865809	0.542532	0.819956	0	0.736675	0.741171	1.71631	1.82424	1.56576	1.80339	1.80848	1.6281	1.70566	0.819615	0.985345	0.823222	0.818528	0.903225	0.863649	0.84512	0.785219	1.03953	0.856496	0.92715	0.995692	0.918099	0.890157	0.830772	MPP_only
Gm42418	1.35754	1.83963	1.40365	2.82204	1.63013	1.98495	1.56608	1.51047	1.65143	1.76743	1.46881	1.56969	1.55418	1.65445	1.653	1.14926	1.31515	0.563756	1.21333	1.26995	1.26555	1.28121	1.89485	1.75256	1.75367	1.37541	1.62963	1.56995	1.73981	1.66856	1.60837	1.31686	1.56884	1.42204	1.40154	1.32586	1.33426	MPP_only
H3f3b	3.40329	3.10853	2.39121	3.20747	2.93511	2.98094	2.88566	3.44937	3.41448	3.2698	2.78651	2.9926	3.02482	3.02123	3.53064	3.45835	3.68742	2.34811	3.39035	3.48151	3.51615	3.45868	3.53262	3.21675	3.25829	3.28712	2.88954	2.87315	2.95625	3.44118	3.09444	2.89711	3.07797	2.83997	2.81075	2.95788	3.37114	MPP_only
Hhex	0.476603	0.888726	0.668026	0.90918	0.713884	0.407501	0.746758	0.692709	0.937428	0.923023	1.29071	0.758148	0	0.829415	0.793312	0.441628	0.543197	0	0.475509	0.283414	0.668428	0.319766	0.50136	0.921291	0.573802	0.352336	0.733813	0.494177	0.864873	0.701431	0.864164	0.274634	0.355518	0.648389	0.439509	0.74634	0.634169	MPP_only
Hist1h2ap	0.0879726	0.513085	0	0.90918	0.282419	0.585916	0.02464	0.0434215	0	0.69802	0	0.42028	0	0.0244427	0.0327461	0.170467	1.50686	0	1.2092	0.590935	0.210994	0.137355	0.138072	0.722016	0.119435	0.352336	0.385231	0.116523	0.0171027	0.0349426	0.821749	0.0879963	0.779258	0.462272	0.197681	0.0632977	0.039709	MPP_only
Hmmr	0	1.0141	0	1.09071	0.136158	0.110212	0.0117397	0.00747725	0	1.23293	0	0.237811	0	0.00394777	0	0.00861599	0.704347	0	0.161703	0.111208	0	0.0186132	0	1.16184	0.0914384	1.26252	0.186802	0	0.00640372	0.0125527	1.2078	0.0259277	0.780047	0.181288	0.149964	0.0125817	0.00736447	MPP_only
Ier2	2.06984	0.675708	0.603117	0	0.849303	0.746348	1.10348	1.80882	2.03145	0.751327	0.949212	0.870127	1.20186	1.00175	1.97512	1.73026	1.45368	0.563756	1.28577	1.75617	1.67839	2.01377	1.02059	0.622949	1.4842	0.352336	0.741029	0.718909	0.836062	1.92976	0.697435	1.54392	1.35901	0.85181	1.16347	1.13658	1.87629	MPP_only
Incenp	0.0897942	1.02838	0.178481	0.687225	0.458293	0.618376	0.0892167	0.0876747	0.0901543	1.15243	0	0.509071	0.227015	0.100831	0.0695783	0.0782124	0.776336	0	0.464215	0.259708	0.0286146	0.086123	0	1.14038	0.17262	1.37541	0.49413	0.381066	0.0920827	0.0899882	1.17998	0.135768	0.959964	0.479825	0.382374	0.0823535	0.0821619	MPP_only
Junb	0.926694	0.310035	0.363558	0	0.515819	0.625636	0.604476	1.30869	1.31748	0.437553	0.949212	0.462077	0	0.611438	1.56435	1.20719	1.03934	0.563756	0.84586	1.52598	0.858953	1.31941	1.45931	0.380815	0.960707	0.612356	0.40974	0.360867	0.450236	1.49766	0.734443	2.38098	2.21382	0.792758	0.901303	0.943493	1.72302	MPP_only
Kif20a	0	0.506347	0	0.90918	0.12665	0.168515	0.00651001	0.0136517	0.0668688	0.627218	0	0.133171	0	0	0.00675894	0.00386411	0.283689	0	0.101582	0.0794951	0	0.0115741	0	0.656578	0.0740969	0.352336	0.168491	0.0769661	0.0024565	0.0133928	0.585481	0.022341	0.353059	0.146825	0.084878	0.00279196	0.0154711	MPP_only
Kif20b	0	1.11998	0	0.687225	0.399373	0.467869	0.105304	0.0717493	0.110198	1.05411	0	0.467831	0	0.0830779	0.0511848	0.0579215	0.572279	0	0.308289	0.244857	0.0232394	0.0522715	0	1.09	0.0916003	1.65324	0.378999	0.116523	0.086552	0.0718342	1.06761	0.116144	0.80928	0.435098	0.329256	0.0933264	0.0690929	MPP_only
Kif23	0.0586226	0.864881	0	0	0.215069	0.559644	0.0643152	0.0312696	0.445658	1.08532	0	0.356081	0	0.205469	0.208376	0.228496	0.710489	0	0.359348	0.206247	0.205371	0.183359	0	1.03883	0.33403	0.818528	0.308072	0.172954	0.19038	0.184497	1.08593	0.102258	0.679528	0.30781	0.290669	0.197294	0.184772	MPP_only
Lgals9	0.42495	0.714117	0.489544	0.90918	0.549969	0.565726	0.383403	0.327208	0.241694	0.807363	1.27794	0.680166	0.227015	0.552062	0.41279	0.726768	1.11421	0	1.02496	0.754783	0.911517	0.477919	0.463976	0.87736	0.817147	0.818528	0.760292	0.42507	0.496477	0.432484	0.96512	0.878796	1.12189	0.804875	0.669937	0.617084	0.496326	MPP_only
Luc7l3	0.985141	1.00546	1.11175	1.49485	1.05596	0.871077	1.01388	0.843976	0.717469	0.779414	1.06477	0.989282	1.07194	0.865448	0.673581	0.415369	0.510981	0.32109	0.560498	0.440991	0.668112	0.501357	0.510295	0.815938	0.965819	0.818528	0.945259	1.00185	0.847992	0.630386	0.870803	0.801283	0.928315	1.00903	0.840023	0.881258	0.659512	MPP_only
Map2k3	0.590758	0.507879	0.255896	0.401521	0.494614	0.400655	0.389603	0.405644	0.439669	0.341447	0.379251	0.400115	0.227015	0.274237	0.382094	0.695795	0.736016	0	0.616703	0.581578	0.536828	0.648141	0.299086	0.344933	0.254994	0.352336	0.359759	0.212559	0.303697	0.346454	0.36916	0.581267	0.583347	0.390779	0.342836	0.319785	0.31265	MPP_only
Mcl1	1.00227	0.815688	0.997449	0.90918	0.783595	1.10856	0.8536	1.14159	1.48241	0.789231	0.542532	0.673235	1.2095	0.760448	1.3291	1.34044	1.21964	0	1.10503	1.19616	1.05844	1.44748	1.20161	0.740753	1.16186	0.818528	0.667384	0.644653	0.720153	1.27032	0.95209	1.48388	1.30345	0.876024	1.0473	1.08079	1.41902	MPP_only
Mis18bp1	0	0.811573	0	0	0.224765	0.467988	0.0336502	0.0134345	0	1.07712	0	0.276448	0	0.0505043	0.0180096	0.04476	0.56879	0	0.253046	0.163883	0.0775947	0.0322721	0.138072	1.0974	0.12112	1.80313	0.294158	0	0.039577	0.0264801	1.06362	0.0566629	0.68675	0.311267	0.0867641	0.0425534	0.0284044	MPP_only
Mki67	0.0786542	2.04705	0	1.24429	0.827002	1.28021	0.0331486	0.0410763	0.20714	2.22472	0	1.08839	0.621911	0.0684694	0.0356602	0.0860349	1.75933	0	0.95509	0.56126	0.0766828	0.030437	0	2.22061	0.249388	2.95296	0.955516	0.709024	0.0422278	0.0555867	2.2088	0.213366	2.02319	0.973934	0.408824	0.0847831	0.0360814	MPP_only
Myc	1.03032	0.916849	1.09793	1.24429	1.16947	0.839374	1.30522	0.783499	0.682108	0.587268	0.964229	0.842487	0.50104	0.864412	0.692266	0.353644	0.344409	0	0.504224	0.486444	0.623453	0.250206	0.407335	0.705046	0.634928	1.37541	0.883202	1.10877	0.919812	0.566329	0.83859	1.23839	1.26448	1.02425	1.06767	1.00876	0.546307	MPP_only
Ncapg	0.033547	0.562488	0	0	0.30712	0.351153	0.0156234	0.0123827	0.0668688	0.650865	0.341502	0.326829	0	0.0250151	0.00774467	0.0207613	0.294186	0	0.190003	0.10192	0.0665603	0.0163953	0	0.661136	0.0762127	0.818528	0.313119	0.0769661	0.0122482	0.00659887	0.675348	0.0906362	0.5314	0.271516	0.150776	0.0177444	0.0166056	MPP_only
Neat1	1.05107	0.457567	0.137962	0.401521	0.494448	1.13023	0.679485	1.13955	0.746891	0.721924	0	0.593507	1.41972	0.804309	1.3185	1.18495	1.18169	0.922082	1.01473	1.9366	1.10176	1.43617	0.943046	0.618498	0.871919	0.612356	0.54659	0.744185	0.717541	1.32092	0.739162	1.12517	0.904701	0.620564	1.35318	0.981408	1.48735	MPP_only
Ninj1	0.721984	0.626764	0.281556	0.687225	0.859847	0.316049	0.974315	0.964451	1.05989	0.612612	0.741395	0.863193	0.596747	0.981639	1.01623	1.60784	1.24786	0.32109	1.28691	0.771896	1.19535	1.34796	1.09493	0.609962	0.914543	0	0.79102	0.912877	0.925196	0.943143	0.568717	0.853221	0.635675	0.751736	0.567382	0.833173	0.919349	MPP_only
Plk1	0	0.647946	0	0	0.0588701	0.0384008	0.00832981	0.00314435	0	0.766957	0	0.0948418	0	0.0035194	0.00508784	0.00891026	0.272903	0	0.0443963	0.0837975	0	0	0	0.786327	0.0304697	0.352336	0.099085	0.255726	0.00529941	0.00698709	0.780834	0.0150674	0.446839	0.101816	0.122447	0.0099196	0.00504618	MPP_only
Prc1	0.033547	1.21593	0	0.687225	0.320967	0.357892	0.0260436	0.0225111	0.0668688	1.39038	0	0.401014	0	0.034633	0.0310265	0.0280139	0.737734	0	0.249739	0.217186	0.0193091	0.0124854	0	1.37439	0.226539	1.37541	0.382017	0.255726	0.0260563	0.015955	1.34059	0.072239	0.961865	0.335592	0.154732	0.0212419	0.0185453	MPP_only
Rasa2	0.306091	0.235253	0.465163	0.401521	0.223952	0.0668846	0.193968	0.201128	0.0668688	0.172271	0	0.162325	0	0.169006	0.142589	0.575187	0.602446	0.32109	0.399707	0.295487	0.503473	0.407451	0	0.166746	0.151427	0	0.152895	0.308547	0.161979	0.132721	0.24417	0.162068	0.18398	0.172497	0.145235	0.185482	0.18514	MPP_only
Retreg1	0.260758	0.414218	0.0783793	0	0.296746	0.211741	0.333852	0.367788	0.808108	0.709689	0.592418	0.46256	0.227015	0.679091	0.573194	0.411599	0.461231	0.32109	0.339424	0.261435	0.178212	0.387528	0.752049	0.722408	0.616181	1.26252	0.495167	0.270317	0.609894	0.780631	0.756539	0.5486	0.64857	0.448676	0.217275	0.638455	0.679065	MPP_only
Rpl29	2.86947	2.98263	2.97217	3.10217	2.94488	2.78412	2.98934	2.94053	3.06808	3.03043	3.30617	3.00969	3.01174	3.10634	3.00961	2.72788	2.69064	1.71264	2.69542	2.67269	2.65364	2.70416	2.93992	3.03303	3.0681	2.90788	3.01588	3.03969	3.0849	2.98095	2.92121	2.86744	2.86578	2.95147	2.94771	2.98531	2.93138	MPP_only
Rpl35	1.96283	1.96023	1.73808	2.00462	2.00385	2.06122	2.05277	2.03862	2.48063	2.00773	2.03877	2.1214	2.04229	2.10181	2.10422	2.58043	2.45255	1.48335	2.5465	2.52881	2.58822	2.5036	2.25394	2.09761	2.07549	2.04875	2.19675	2.24453	2.20855	2.12842	2.18896	2.11931	2.10453	2.23538	2.23378	2.21418	2.21438	MPP_only
Rpl36al	0.933031	0.903538	0.900803	1.59995	0.965248	0.817105	0.960793	0.899226	0.749055	0.848401	0.921783	0.973003	1.11379	0.923464	0.720184	0.490701	0.555787	0.563756	0.579594	0.815549	0.467777	0.48159	0.592492	0.797614	0.618459	0.612356	0.973995	1.40513	0.838991	0.754106	0.813952	0.811661	0.811399	0.943406	1.2223	0.851916	0.743466	MPP_only
Runx2	0.882452	0.501373	0.321561	0.401521	0.43857	0.226022	0.580214	0.486369	0.634794	0.527612	0	0.416309	0	0.630778	0.445925	0.92361	0.870542	0	0.704141	0.409955	0.98845	0.661057	0.41217	0.540497	0.237655	0.818528	0.441083	0.358527	0.508087	0.476143	0.632879	0.327351	0.392199	0.508744	0.0881593	0.618545	0.563267	MPP_only
Runx3	0.480235	0.60606	0.680327	0.687225	0.563119	0.200951	0.614276	0.389598	0.594223	0.560318	0.933919	0.601752	0.38257	0.518337	0.337996	0.899189	0.965269	0	0.892809	0.481651	0.812057	0.351502	0.430128	0.562382	0.191893	0.352336	0.58742	0.358665	0.539607	0.399595	0.675859	0.865593	0.993033	0.644133	0.426556	0.655119	0.350463	MPP_only
Sell	0.211314	0.429545	0.960604	0.687225	0.351088	0.746845	0.337961	0.103736	0.12391	0.389154	1.02773	0.357643	0.394895	0.266263	0.0997258	0.273672	0.495298	0	0.387572	0.579635	0.71274	0.0507225	0.294251	0.471316	0.456638	0.989372	0.40114	0.514	0.308052	0.11268	0.633836	0.449682	0.615155	0.521838	0.469834	0.444277	0.0707259	MPP_only
Selplg	0.551057	0.705031	0.758707	0.401521	0.709147	1.48106	0.6697	0.434989	0.601853	0.803025	0.720752	0.772489	2.21959	0.719972	0.554564	1.24261	1.47368	0.563756	1.19657	1.12381	1.2038	0.746123	0.563015	0.796498	0.584546	0.352336	0.797978	1.13752	0.786983	0.647956	0.783186	0.66148	0.782763	0.833205	0.74575	0.762944	0.525497	MPP_only
Tgfb1	0.905067	1.22324	1.13084	1.69504	1.31717	1.26672	1.11383	0.821188	0.859966	1.12918	0.933919	1.28259	1.74107	1.11365	0.854618	1.4475	1.52812	0	1.60099	1.44659	1.18442	0.883219	1.0253	1.13838	1.05948	0.989372	1.27858	1.29283	1.10666	0.864662	1.12107	1.154	1.3722	1.26636	1.2254	1.0641	0.712937	MPP_only
Trim59	0	0.61616	0.0783793	0.687225	0.188666	0.249596	0.131792	0.0995562	0.0668688	0.696709	0.379251	0.252896	0	0.172033	0.126294	0.0900501	0.201694	0	0.146383	0.110705	0.0271904	0.0631547	0	0.618272	0.315276	1.13524	0.231876	0.0959884	0.136982	0.102269	0.655458	0.0966107	0.320426	0.207566	0.11934	0.156219	0.0893215	MPP_only
Tuba1b	1.57543	2.61868	0.925988	2.79221	2.49698	2.29678	1.4243	1.16576	1.53751	2.75338	0.887398	2.54951	1.75937	1.14368	1.10753	0.982884	2.26845	0	2.26374	1.19339	0.997161	0.778089	1.57753	2.75669	1.47003	3.09645	2.61826	2.13682	1.17625	1.02912	2.57598	1.3344	2.65522	2.49957	1.21565	1.03215	0.929595	MPP_only
Tuba1c	0.393799	0.900784	0	0.401521	0.201283	0.438231	0.112921	0.165154	0.0668688	0.961639	0.379251	0.268851	0.621911	0.12465	0.133131	0.132748	0.467796	0	0.181665	0.21445	0.117011	0.132908	0	0.936959	0.0668427	0.612356	0.234834	0.42499	0.112057	0.139734	0.888218	0.0988168	0.671548	0.195062	0.247691	0.100507	0.110239	MPP_only
Txnip	1.01394	0.886782	0.741079	0	0.679821	0.665653	0.96407	1.31629	1.233	1.19653	1.84083	0.917489	1.10111	1.55803	1.69605	1.77499	1.58039	0	1.37822	1.31543	1.87183	2.11667	1.38453	1.16266	1.42949	0.818528	0.898071	0.679305	1.56129	1.69235	1.02929	0.820491	0.7891	0.807533	0.616047	1.46801	1.76695	MPP_only
Uba52	0.379229	0.396294	0.0783793	0.401521	0.42497	0.532603	0.397048	0.373905	0.380233	0.556872	1.49174	0.466239	1.2095	0.553983	0.519469	1.05811	1.07225	0.563756	1.0609	1.02077	0.961172	0.931378	0.432323	0.470604	0.562612	0	0.48182	0.479413	0.504771	0.503073	0.463666	0.492921	0.490047	0.520751	0.419019	0.509004	0.515169	MPP_only
Ube2c	0	1.97301	0	0	0.193487	0.927251	0.0196839	0.0195862	0.0668688	2.17578	0	0.301171	0	0.0471812	0.0407925	0.0278772	1.71642	0	0.194365	0.462268	0.0286146	0.0240713	0	2.13167	0	2.24577	0.263068	0.639575	0.0309155	0.0318989	2.04244	0.0387729	1.59208	0.236717	0.383408	0.0443159	0.0482077	MPP_only
Zfp36	0.747151	0.199428	0.178481	0	0.266823	0.505189	0.363043	0.855878	1.22639	0.408238	0	0.39969	0.777465	0.579127	1.32632	1.1137	0.834492	0.758884	0.681393	0.951886	1.03161	1.15064	1.13641	0.345703	1.07442	0	0.328413	0.332692	0.479181	1.27833	0.57118	1.32903	1.06749	0.553006	0.535513	0.853833	1.35852	MPP_only
Anks1	0.109566	0.305007	0.281556	0	0.256779	0.204547	0.228911	0.183499	0.364792	0.295733	0.856024	0.234487	0.227015	0.28097	0.262104	0.697484	0.641762	0	0.663671	0.338867	0.575656	0.874606	0.133236	0.323431	0.272115	0.612356	0.243458	0.281699	0.245326	0.29593	0.327013	0.188196	0.230515	0.273571	0.178758	0.287765	0.248195	overlap
Cdkn1a	0.126175	0.142757	0	0	0.167076	0.116574	0.0793628	0.266853	0.189028	0.124335	0	0.0924323	0.227015	0.0400232	0.261548	0.807828	1.08641	0	0.891187	0.419775	0.585076	0.652276	0	0.0700708	0.330995	0	0.107741	0.212511	0.0294971	0.197652	0.15802	0.760989	0.772375	0.1824	0.122159	0.113701	0.185333	overlap
Cebpb	0.738115	0.509828	1.54858	0.90918	0.72787	0.711861	0.704708	0.892269	1.26219	0.31173	0.720752	0.388677	0.227015	0.303622	0.745925	2.0352	1.99468	0	1.53756	1.42834	1.79195	2.4572	0.843108	0.30028	1.03868	0.352336	0.387643	1.14209	0.28896	0.83783	0.580691	1.40554	1.44434	0.651371	1.04504	0.779489	0.849535	overlap
Cirbp	0.847657	0.5788	0.466128	0.90918	0.618968	0.321284	0.613833	0.723481	1.14478	0.860434	1.17583	0.790173	0.991642	0.741935	1.06913	1.49751	1.47668	0.758884	1.3834	1.25525	1.04652	1.60744	1.46201	0.910843	0.831726	0.818528	0.860081	0.607074	0.858404	1.13204	0.856722	0.618856	0.631255	0.890606	0.553349	0.89606	1.09022	overlap
Cish	0	0.0743847	0.209267	0	0.0736979	0	0.0777865	0.185532	0.250787	0.0691497	0.933919	0.051467	0	0.0871228	0.167415	0.364189	0.385978	0	0.283508	0.146287	0.137724	0.687026	0	0.0624934	0.210601	0.352336	0.0549507	0.116523	0.0790012	0.159559	0.273655	1.18709	1.03331	0.219841	0.119445	0.224382	0.555192	overlap
Cited2	0.633383	0.481084	0.916485	0.401521	0.391892	0.563745	0.432973	0.570864	0.461599	0.691901	0.921783	0.519714	0.621911	0.722267	0.854559	0.40614	0.323957	1.06235	0.301178	0.551896	0.318279	0.404803	1.00699	0.704516	0.990036	1.93346	0.533371	0.898858	0.7009	0.807873	1.16142	2.99943	2.52705	0.950904	1.01796	1.32145	1.67567	overlap
Ctla2a	3.04063	1.93619	1.85851	1.49485	2.00771	0.893877	2.25631	2.61026	3.10871	2.10832	2.61857	2.04141	1.03316	2.40188	2.7915	3.83257	3.11513	0.32109	3.11487	1.60992	3.38471	3.61803	3.06463	2.00605	2.54109	1.56892	2.02617	0.437301	2.30279	2.75855	1.96168	2.18523	1.7905	1.89453	0.460853	2.36738	2.57992	overlap
Cytip	0.395502	0.355993	0.404831	0.401521	0.24561	0.722893	0.288688	0.35513	0.434953	0.288028	0	0.24032	0.227015	0.351455	0.326606	1.30146	1.08665	0.563756	0.892608	1.1946	1.1799	1.02365	0.161014	0.299923	0.208386	0.352336	0.216083	0.445473	0.327237	0.357352	0.374395	0.619688	0.566642	0.280929	0.583054	0.377658	0.42442	overlap
Ddit4	0.0897942	0.0572054	0.209267	0	0.0369134	0.0611382	0.0646444	0.144887	0.12391	0.0628089	0	0.0421578	0	0.12707	0.140057	0.402721	0.480987	0	0.311609	0.435011	0.540996	0.517116	0.138072	0.063408	0.053773	0	0.0484217	0	0.11736	0.130556	0.0559598	0.0292305	0.0147282	0.0368534	0.0300309	0.0768438	0.0887533	overlap
Dennd4a	0.295681	0.206316	0	0.401521	0.184067	0.24515	0.119434	0.349284	0.116573	0.138627	0.379251	0.124727	0	0.145425	0.397256	0.778372	0.643634	0	0.440025	0.392082	0.606068	1.08211	0	0.184244	0.399034	0	0.146469	0.193489	0.151465	0.512551	0.215339	0.841455	0.696746	0.205209	0.182731	0.166696	0.414794	overlap
Fbxo9	0.256512	0.352437	0	0.687225	0.324663	0.395911	0.306832	0.44241	0.691535	0.372412	0.720752	0.391209	0.38257	0.375221	0.5097	0.901164	0.557745	0.32109	0.674549	0.662567	0.587193	1.07146	0.664018	0.334731	0.398301	0.818528	0.368476	0.487446	0.404679	0.549707	0.410288	0.620949	0.497114	0.403076	0.554034	0.460589	0.74684	overlap
Fos	2.1128	0.425708	0.671672	0	0.516891	1.08752	0.525055	1.80759	2.43743	0.878007	0.379251	0.91847	0.394895	1.02021	2.37575	1.48078	1.35099	2.31126	1.18038	2.04923	1.80032	1.66235	1.95632	0.672991	1.4091	0	0.737428	0.620579	0.835376	2.41679	0.866424	1.37429	0.925151	0.942981	1.13785	1.36439	2.33744	overlap
Fosb	1.00063	0.224782	0.395309	0	0.275823	0.444082	0.289419	0.727347	0.517263	0.601021	0.949212	0.634004	0.50104	0.710876	1.26278	0.47286	0.445989	2.273	0.50409	1.24167	0.513859	0.584855	0.857491	0.59048	0.946544	0	0.617584	0.758142	0.719907	1.48165	0.70415	1.06553	0.773553	0.683063	0.688781	0.792934	1.60262	overlap
Fosl2	0.142255	0.0303299	0	0	0.0557732	0	0.056087	0.201709	0	0.0593532	0	0.0572757	0.38257	0.0624122	0.205638	0.704287	0.608056	0	0.409704	0.279758	0.595518	1.00145	0.133236	0.028421	0.119821	0.352336	0.0364601	0	0.0237838	0.219904	0.0754904	0.303636	0.14537	0.0491236	0.119829	0.0783118	0.166914	overlap
Galc	0	0.0620342	0	0	0.0365479	0	0.0455008	0.0772839	0	0.0785351	0	0.0459304	0	0.0842387	0.113945	0.209956	0.20635	0	0.200149	0.0456203	0.252668	0.509918	0.180734	0.084553	0.144493	0	0.0692214	0.212511	0.0664449	0.0938369	0.105127	0.0479866	0.0939872	0.0617088	0.0155872	0.0788394	0.15204	overlap
Gimap1	0.864884	0.799539	0.805929	0.401521	0.66838	0.122983	0.804847	0.92422	1.14461	1.01591	1.53797	0.736394	0.677045	1.11601	1.28178	0.688493	0.686962	0.563756	0.603326	0.464278	0.635803	0.698793	1.05821	0.962162	0.768408	1.37541	0.784288	0.344614	1.08832	1.25542	1.03352	0.841993	0.877722	0.769769	0.4124	1.02539	1.20959	overlap
Gpr65	0.157347	0.191313	0.355998	0	0.138525	0.27239	0.160074	0.109093	0	0.118717	0	0.135314	0	0.175529	0.078776	0.547261	0.477793	0	0.492107	0.360001	0.587139	0.509371	0.180734	0.159096	0.296639	0.352336	0.142233	0.348242	0.157479	0.115202	0.194055	0.324378	0.30543	0.190463	0.219387	0.256039	0.201787	overlap
Hlf	1.59669	1.19119	0.588137	0.401521	0.861416	0.363484	1.21059	1.74417	1.39371	1.29876	1.74342	0.944902	0.50104	1.34562	1.79345	0.916963	0.943182	0	0.753002	0.229687	1.06752	1.26273	1.36483	1.21443	1.15118	0	0.87994	0.48702	1.25329	1.70547	1.14463	0.592235	0.653238	0.797905	0.168502	1.20617	1.70784	overlap
Hnrnpdl	0.93908	1.18545	0.280277	0.90918	1.10494	0.923008	0.911496	0.946387	0.989248	0.917882	0	0.916317	1.2095	0.606997	0.660256	1.04616	1.2291	0.32109	1.28521	1.13242	0.753577	0.904291	1.24388	0.922543	0.516732	1.56892	0.917652	0.779475	0.653486	0.649266	0.965916	0.855025	1.0076	0.991673	0.707417	0.673806	0.69562	overlap
Ifngr1	0.579026	0.466218	0.209267	0.401521	0.418316	1.04815	0.424632	0.523266	0.384007	0.557906	0.379251	0.476053	0.596747	0.598151	0.544585	1.8756	1.59099	0	1.43788	1.57433	1.53305	1.71692	0.723974	0.632471	0.511551	0.612356	0.525852	1.12242	0.62984	0.593994	0.588977	0.459125	0.514565	0.528554	1.21765	0.623058	0.561905	overlap
Jun	2.06393	1.0276	1.21664	0	1.01293	1.34485	1.38515	2.1697	2.5085	1.52609	1.64232	1.47002	1.96314	1.77969	2.46744	1.72086	1.55205	2.75789	1.33233	2.20499	1.69133	1.60678	1.6318	1.47162	2.15267	1.65324	1.43	1.18667	1.69734	2.71658	1.6574	2.77567	2.28704	1.56479	1.63843	2.12673	2.77737	overlap
Klf13	0.23558	0.433111	0.563593	0	0.387613	0.341796	0.428373	0.386801	0.42579	0.356993	0.379251	0.309448	0.621911	0.280389	0.486794	0.768877	0.758172	0.32109	0.597935	0.675693	0.632735	0.866639	0.409658	0.327513	0.316531	0.352336	0.312191	0.368645	0.348347	0.431428	0.421306	0.323906	0.374837	0.317132	0.558321	0.400234	0.390269	overlap
Klf2	0.531899	0.137324	0	0	0.0900942	0.751217	0.110754	0.516815	0.920164	0.296943	0	0.126956	0.394895	0.15274	0.832877	0.780427	0.655145	0.32109	0.273461	0.521851	0.852501	1.29867	1.37244	0.327265	0.844139	0	0.186785	0.348024	0.20704	1.13991	0.358166	0.406528	0.375299	0.195194	0.436855	0.367161	0.768688	overlap
Klf6	1.31257	0.351124	0.355998	0.401521	0.184055	0.658468	0.232351	0.913948	1.19446	0.652761	0	0.318608	0.50104	0.455996	1.16969	0.972963	0.67444	0.32109	0.544682	1.33751	1.04844	1.13104	1.55061	0.536418	1.02827	0.352336	0.267615	0.195691	0.411927	1.28064	0.702775	1.615	1.13244	0.441901	0.638717	0.823302	1.68188	overlap
Klf9	0.248608	0.129138	0	0	0.0973259	0.0384008	0.102725	0.400637	0.59803	0.140081	0.379251	0.092516	0	0.126791	0.504995	0.607986	0.535178	0	0.449857	0.282499	0.262202	0.96538	0.276422	0.105324	0.257048	0	0.0862718	0	0.0955272	0.471741	0.125477	0.391683	0.31427	0.0733951	0.1008	0.140047	0.500473	overlap
Lyl1	1.14058	1.01814	0.386784	1.09071	0.860955	0.299118	0.980699	0.9741	0.929788	0.877973	1.29071	0.835882	0.806967	0.925913	0.882617	0.404711	0.521464	0	0.413064	0.279204	0.783836	0.413373	0.829841	0.908712	0.785458	0.352336	0.809637	0.700127	0.862047	0.813295	0.851729	0.416756	0.655256	0.740612	0.375452	0.877685	0.736141	overlap
Nek6	0.188061	0.209492	0.177517	0.401521	0.232055	0.173162	0.209863	0.148693	0.162932	0.115934	0	0.168043	0	0.138835	0.142286	0.436479	0.364541	0	0.413721	0.210191	0.325847	0.585828	0	0.0933528	0.160892	0	0.134295	0.299801	0.117816	0.120862	0.121682	0.144385	0.0881541	0.146294	0.132354	0.142413	0.0959058	overlap
Neurl3	0.355721	0.113788	0	0.401521	0.126689	0.0768722	0.178769	0.422803	0.712199	0.264911	1.13495	0.220845	0.227015	0.392741	0.696135	1.45891	1.12829	0	0.916658	0.733314	1.08422	1.77485	1.01216	0.25385	0.590829	0	0.193523	0.193489	0.422613	0.750595	0.242838	0.812242	0.476969	0.186105	0.125078	0.35834	0.730235	overlap
Odc1	0.683968	0.981392	0.59672	1.3774	1.17699	0.75972	0.799964	0.730054	0.651539	0.675918	0.921783	0.914624	1.28979	0.473705	0.585473	1.06774	1.18237	0	1.31549	0.714518	0.765416	0.760418	0.740744	0.700063	0.616785	0.989372	0.952091	0.636071	0.541315	0.530804	0.765366	0.660014	0.831931	0.970759	0.727554	0.569562	0.506464	overlap
Pde10a	0	0.012629	0	0	0.00709426	0	0.00122857	0.0769043	0.216544	0.0137278	0	0.007056	0	0	0.0906412	0.418247	0.468626	0	0.32921	0.0473393	0.10949	0.645513	0.274098	0.0110702	0	0	0.00843842	0	0.00260199	0.0824899	0.0127385	0.0219785	0.00935743	0.00243331	0	0.0103867	0.0533232	overlap
Pde4b	0.673502	0.230462	0.358656	0	0.1922	0.0384008	0.204478	0.323055	0.578198	0.320012	0.720752	0.267633	0.227015	0.326651	0.446164	1.37102	1.35365	0	1.13457	0.617168	1.29025	1.0047	0.556478	0.308265	0.345343	0.818528	0.279335	0.0769661	0.337578	0.496521	0.323568	0.806638	0.571573	0.275196	0.162956	0.341416	0.468958	overlap
Per1	0.198301	0.0485089	0	0	0.0394001	0.0838015	0.0520369	0.172195	0.233205	0.0850933	0	0.0619779	0	0.0549875	0.197089	0.630737	0.699844	0.32109	0.575551	0.37481	0.499493	0.769851	0.218979	0.0679772	0.0588521	0	0.0506156	0	0.0680647	0.197826	0.0656844	0.206582	0.147638	0.0684798	0.0430971	0.0871697	0.234264	overlap
Pik3ip1	0.434619	0.27781	0	0.401521	0.155671	0	0.355156	0.477195	0.959728	0.541939	1.39856	0.325187	0	0.721223	0.868059	1.12169	1.01097	0.32109	0.742363	0.698451	1.39484	1.25228	0.643111	0.457988	0.591883	0.612356	0.32226	0.331203	0.671609	0.799075	0.56425	0.351638	0.286282	0.330242	0.248695	0.615236	0.845161	overlap
Plaur	0	0.0808968	0	0	0.084805	0.123574	0.0728525	0.106316	0.180259	0.0654235	0	0.083016	0	0.0790778	0.128546	1.15211	1.13639	0	0.962175	0.594894	0.968053	1.06996	0	0.0613233	0.104595	0	0.0549421	0.135731	0.0496771	0.0919122	0.0508805	0.0606045	0.0654647	0.0584847	0.0949961	0.0518334	0.0654697	overlap
Rgs1	1.79188	0.448642	0	0	0.380387	0.227135	0.367474	1.60533	2.10662	0.962544	0.592418	0.672945	0.806967	0.753747	2.04009	1.40315	1.13817	0	0.971396	1.35646	1.75026	1.32182	2.17122	0.704584	1.42416	0.352336	0.532838	0.562747	0.805494	1.95782	0.821167	2.50145	1.79505	0.665757	0.628976	1.11235	1.78512	overlap
Rnf125	0.033547	0.0732986	0.355998	0	0.0527555	0.162013	0.0463692	0.145364	0.0668688	0.09983	0.379251	0.0740038	0	0.0556799	0.129511	0.555144	0.501047	0	0.430674	0.3919	0.469585	0.745703	0	0.103996	0.0304697	0	0.0707528	0	0.0519005	0.181474	0.0992898	0.0316638	0.0301711	0.0531871	0.0795236	0.041674	0.164209	overlap
Rsrp1	1.1459	1.29622	1.44104	0.687225	1.05414	1.20358	1.32938	1.37217	1.14513	1.43839	2.03877	1.28281	1.35896	1.65162	1.40407	0.815233	0.784261	0	0.629963	0.865489	1.07571	0.8559	0.996318	1.56897	1.61522	1.87042	1.37905	1.56922	1.73307	1.53247	1.47527	1.18607	1.20907	1.25797	1.60153	1.6761	1.49377	overlap
Smim3	0.138507	0.177624	0	0.401521	0.205759	0.224022	0.247502	0.309232	0.526439	0.150447	0.720752	0.193855	0.596747	0.27214	0.266073	0.80031	0.637612	0	0.612795	0.591632	0.423508	0.628164	0.249045	0.214287	0.412616	0	0.210741	0.332692	0.286441	0.304766	0.213295	0.324724	0.257986	0.207642	0.192248	0.290489	0.301007	overlap
Sox4	1.98852	1.86875	1.53933	0.687225	1.58359	0.836658	1.97094	1.72595	1.7844	1.91024	1.82431	1.59634	1.10111	2.17991	1.69854	1.51159	1.66474	0	1.27171	1.1265	1.771	0.991508	1.72503	1.80987	1.87837	1.99277	1.59869	1.15831	2.10048	1.68817	1.8313	1.43085	1.57131	1.54635	0.697324	1.9632	1.58583	overlap
Srsf5	2.22372	1.48902	1.40714	1.09071	1.46482	1.43685	1.66367	1.93214	1.62684	1.38681	1.63473	1.43426	1.35896	1.50756	1.85571	2.00413	1.89123	0	1.76613	1.76616	1.94585	2.18605	1.94028	1.34667	1.78645	1.56892	1.36019	1.41711	1.4869	1.89335	1.42252	1.75363	1.51531	1.40027	1.39595	1.52576	1.75868	overlap
Stk17b	0.565796	0.348014	0	0	0.185526	0.209954	0.237245	0.362426	0.864611	0.439968	0	0.23629	0.227015	0.292741	0.469423	1.24868	1.10338	0	0.898451	0.809507	1.29083	1.021	0.946013	0.423154	0.40032	0.612356	0.235724	0.195691	0.308003	0.509419	0.455116	0.371295	0.388443	0.293955	0.197434	0.324328	0.499189	overlap
Sult1a1	0	0.00823455	0	0	0.00597751	0.167541	0.0103582	0.149552	0	0.00909071	0	0.00348257	0	0.00542751	0.147286	0.0890207	0.0250219	0	0.0432753	0.0928982	0.0759029	0.619743	0.133236	0.00526353	0.0588521	0	0.011461	0	0.00634818	0.110798	0.0155316	0.0922723	0.0177518	0.0209653	0.142188	0.0159989	0.236373	overlap
Tmed5	1.21086	0.916769	0.609753	1.24429	0.800313	0.778045	0.803889	0.913855	1.19366	0.668571	0.921783	0.643979	1.35657	0.65583	0.785904	1.0479	1.03577	0	0.962493	1.0265	0.816689	1.0007	1.15981	0.669377	0.625479	0.818528	0.675758	0.898575	0.631065	0.808442	0.751471	1.05426	1.02921	0.700697	0.725166	0.774214	0.857671	overlap
Tsc22d1	1.08996	1.03946	0.881434	0	0.724138	0.217352	0.882638	1.38647	1.08779	1.02818	0.921783	0.75	0.227015	1.0447	1.3854	1.62301	1.50814	0	0.982492	0.416744	1.66363	2.25691	1.34845	0.975674	1.11737	1.73099	0.679626	0	1.09295	1.39759	1.07086	1.0772	1.09086	0.748672	0.222968	1.18276	1.34824	overlap
Tsc22d3	0.5752	0.32633	0.833149	0.401521	0.238823	0.181264	0.309033	0.558061	0.693661	0.708047	1.43708	0.485955	0.227015	0.667876	1.07562	1.95058	1.84368	0.32109	1.52418	1.1697	1.91193	2.5038	0.815988	0.634235	0.863709	0	0.380479	0.193489	0.616381	0.962382	0.718343	0.41536	0.386652	0.453986	0.236266	0.754113	1.12801	overlap
Ucp2	1.42049	1.0009	0.976707	0.687225	1.21123	1.68922	1.20544	0.940539	0.919349	1.21402	1.53797	1.41876	1.57095	1.468	1.26804	1.95919	1.57839	1.18533	1.6869	1.56694	1.78648	1.6888	1.49854	1.33659	1.44098	1.37541	1.4466	1.0694	1.52974	1.21661	1.13535	1.19218	1.15626	1.36406	1.09134	1.43217	1.11943	overlap
mt-Nd1	2.85657	2.69815	2.36525	2.66309	2.83801	2.8287	2.59814	2.63968	2.89711	2.81316	2.17696	2.93245	2.44866	2.66397	2.74866	3.21723	3.2034	2.38365	3.41587	3.32487	2.92743	3.07784	3.2767	2.8601	2.67972	3.01699	2.99107	3.01899	2.70164	2.7784	2.96697	2.89864	2.91669	3.15179	2.98676	2.87338	2.97587	overlap
mt-Nd3	0.852181	0.934544	1.13676	0.90918	1.00267	0.892384	0.902803	1.03378	1.52718	1.16942	0.921783	1.21712	1.14655	1.07811	1.28425	1.83311	1.72715	1.39353	1.81211	1.88751	1.50621	1.91442	1.6417	1.20391	1.31525	0.989372	1.32289	1.44399	1.22841	1.30311	1.43615	1.41325	1.39467	1.5838	1.50913	1.46356	1.64433	overlap

## Sheet: dmPGE2_1.2
	GCSF_Acute-Activation	GCSF_Cell-cycle	GCSF_Interferon	GCSF_Interferon cell-cycle	GCSF_Metabolism	GCSF_Myeloid	GCSF_Primed	GCSF_Primitive	ct_Acute-Activation	ct_Cell-cycle	ct_Interferon	ct_Metabolism	ct_Myeloid	ct_Primed	ct_Primitive	dmPGE2_Acute-Activation	dmPGE2_Cell-cycle	dmPGE2_Interferon	dmPGE2_Metabolism	dmPGE2_Myeloid	dmPGE2_Primed	dmPGE2_Primitive	indo_Acute-Activation	indo_Cell-cycle	indo_Interferon	indo_Interferon cell-cycle	indo_Metabolism	indo_Myeloid	indo_Primed	indo_Primitive	pIC_Cell-cycle	pIC_Interferon	pIC_Interferon cell-cycle	pIC_Metabolism	pIC_Myeloid	pIC_Primed	pIC_Primitive	specific
1810058I24Rik	0.572228	0.782646	0.918282	0	0.746612	0.528119	0.771121	0.707939	0.925212	0.788492	1.06477	0.75569	0.777465	0.841775	0.664773	0.694089	0.681059	0	0.590915	0.587007	0.656858	0.635499	0.531305	0.774445	0.656079	0.818528	0.778834	0.831478	0.897833	0.72925	0.731606	0.588412	0.583713	0.713336	0.667522	0.7856	0.633366	MPP_only
2310033P09Rik	0.359079	0.405076	0.698266	0.401521	0.55018	0.728171	0.455508	0.432223	0.377081	0.304508	0.379251	0.409427	0.61275	0.294904	0.342655	0.21305	0.238226	0.32109	0.234521	0.0970464	0.20618	0.310245	0.218979	0.303604	0.395409	0	0.392176	0.271244	0.39081	0.314558	0.308633	0.348427	0.29622	0.422107	0.208324	0.292074	0.31774	MPP_only
5430427O19Rik	0	0.16206	0.209267	0	0.102233	0.11438	0.100699	0.0394529	0	0.283304	0.379251	0.142321	0	0.157814	0.110763	0.0877153	0.100503	0	0.0793353	0.126889	0.0970472	0.0395127	0.138072	0.243511	0.38997	0.818528	0.150622	0.172954	0.16978	0.088733	0.37025	0.584864	0.530424	0.216374	0.197817	0.283629	0.219222	MPP_only
AC149090.1	0.644459	0.605844	0.858699	0.401521	0.62021	0.514884	0.678643	0.714544	0.698431	0.733782	0.741395	0.77469	0.394895	0.935653	0.784766	0.55494	0.488352	0	0.45078	0.31251	0.592923	0.604746	0.656231	0.732933	0.966747	0.352336	0.791178	0.378488	0.967377	0.902588	0.781869	0.510536	0.455026	0.803595	0.575098	0.971285	0.946043	MPP_only
Aebp2	0.197129	0.347117	0.178481	0.401521	0.336693	0.245817	0.333296	0.326974	0.403558	0.255749	0	0.277732	0	0.26421	0.208349	0.281305	0.310941	0	0.317965	0.183441	0.282862	0.420136	0.180734	0.27752	0.150082	0	0.25403	0.193351	0.247242	0.2617	0.354799	0.324987	0.402421	0.315252	0.231354	0.263686	0.267338	MPP_only
Akirin2	0.533394	0.647998	0.359935	0	0.369378	0.447937	0.480259	0.548312	0.516281	0.742231	0.933919	0.345764	0.227015	0.497587	0.478378	0.384163	0.458104	0	0.319526	0.372102	0.561501	0.416486	0.363288	0.735679	0.377542	1.13524	0.374271	0.0959884	0.456603	0.51423	0.718192	0.371005	0.510873	0.379476	0.393971	0.464457	0.516626	MPP_only
Anln	0	0.394313	0	0.401521	0.11456	0.240735	0.00718507	0.0123881	0	0.466996	0	0.116782	0	0.0302459	0.0114373	0.0182965	0.172615	0	0.10246	0.0997493	0	0.0299733	0	0.429306	0.0657148	0.818528	0.130774	0	0.0116867	0.019143	0.428015	0.0312394	0.300469	0.159221	0.155153	0.0253188	0.00698962	MPP_only
Anp32e	0.780485	1.40162	0.0783793	1.86176	1.02362	1.26273	0.714013	0.786723	0.880842	1.37102	0.341502	0.964372	0.991642	0.557731	0.516748	0.690788	1.34572	0.32109	1.08492	0.947019	0.635777	0.653105	1.2131	1.31472	0.52901	1.73099	0.956886	1.41837	0.562546	0.553683	1.35807	0.666872	1.26212	0.943939	0.875776	0.498006	0.50777	MPP_only
Ap2a2	0.509197	0.21438	0.287646	0	0.20896	0.122209	0.164547	0.167629	0.193515	0.178252	0	0.17987	0	0.185923	0.19816	0.351209	0.366738	0.32109	0.310199	0.325426	0.173941	0.227231	0.294251	0.213259	0.202572	0.352336	0.192832	0.31897	0.201607	0.207188	0.258377	0.128764	0.186607	0.214638	0.216108	0.216643	0.150233	MPP_only
Arf6	0.244648	0.4298	0.387749	0.401521	0.384454	0.339943	0.337382	0.320013	0.283812	0.415949	0	0.362901	0.227015	0.309743	0.435005	0.387344	0.577404	0.32109	0.459603	0.513586	0.189093	0.326556	0.138072	0.362474	0.351569	0.352336	0.403732	0.29953	0.288597	0.341508	0.392685	0.358618	0.442268	0.371486	0.391751	0.287717	0.314037	MPP_only
Arhgap11a	0.0675525	0.451183	0	0	0.147152	0.511233	0.0540193	0.0297121	0.12391	0.486693	0	0.186157	0.227015	0.0299382	0.0427914	0.0474312	0.323694	0	0.171369	0.155403	0	0.0430528	0.161014	0.516907	0.070141	0.612356	0.161425	0.212511	0.037378	0.0382554	0.599467	0.0724928	0.43804	0.184739	0.220969	0.0488831	0.0264266	MPP_only
Arhgef39	0	0.275352	0	0	0.0664794	0.0454007	0.0154013	0.0187684	0	0.402075	0	0.110436	0	0.0342483	0.0258838	0.0333082	0.219265	0	0.0560192	0.0846062	0.0298977	0.0167082	0	0.367773	0	0.352336	0.109729	0	0.0336063	0.0219086	0.455024	0.0221123	0.199417	0.0864199	0.0877842	0.0475834	0.0375318	MPP_only
Arl6ip1	1.44093	2.15392	1.08373	1.24429	1.23229	1.56201	1.22897	1.23904	0.901635	2.37368	1.49174	1.32814	1.72022	1.3507	1.31354	1.25596	2.09508	0.32109	1.25487	1.43282	1.26275	1.19626	1.13814	2.29172	1.56274	2.55154	1.30496	1.31462	1.33722	1.36202	2.35079	1.52104	2.16567	1.40995	1.42106	1.42612	1.31145	MPP_only
Arrdc3	0.155525	0.11479	0	0	0.0502496	0.0934968	0.047229	0.109249	0.0974522	0.128123	0	0.0701933	0	0.0620187	0.139935	0.193827	0.296361	0	0.14291	0.0924276	0.113541	0.211707	0.498514	0.150112	0	0	0.068411	0	0.10996	0.135527	0.130673	0.0256517	0.0278043	0.0450054	0.0223659	0.0712822	0.141659	MPP_only
Arrdc4	0.134642	0.0890083	0.209267	0	0.0620161	0.110846	0.0818303	0.173238	0	0.117323	0.379251	0.064531	0	0.104428	0.107536	0.260752	0.186005	0	0.150817	0.253161	0.200165	0.347389	0.133236	0.0659037	0.221798	0	0.0421402	0.116523	0.0978371	0.141346	0.0944267	0.0948561	0.0917898	0.0516682	0.0476613	0.106982	0.190693	MPP_only
Aspm	0	0.627176	0	0	0.0611328	0.0768722	0.011547	0.0152888	0	0.802231	0	0.0729912	0	0.00199785	0.00596694	0.00849038	0.405478	0	0.0462608	0.0656344	0	0.00487514	0	0.803302	0	1.13524	0.0831439	0.195691	0	0.00978328	0.846089	0.0128394	0.526105	0.0863995	0.0966214	0.0143915	0.0118109	MPP_only
Atp1b3	0.533934	0.583542	0.668026	0.90918	0.697028	0.800251	0.525717	0.341438	0.296416	0.422417	0.542532	0.717411	0.777465	0.397321	0.285643	0.532245	0.618715	0.32109	0.774792	0.488921	0.552936	0.319874	0.150789	0.482653	0.560051	0.818528	0.676362	0.523885	0.394482	0.247451	0.548395	0.53348	0.657534	0.722258	0.439536	0.456245	0.346091	MPP_only
Atp2a2	0.465391	0.49825	0.0783793	1.09071	0.529926	0.545425	0.454572	0.365664	0.275741	0.304307	0	0.366697	0.394895	0.260361	0.244629	0.442409	0.401513	0	0.530674	0.520687	0.386028	0.475603	0	0.266636	0.367953	0.352336	0.385109	0.183007	0.30942	0.256687	0.354532	0.340041	0.362481	0.445575	0.35743	0.266695	0.29083	MPP_only
Atp5j	1.42416	1.57263	1.37101	1.3774	1.67465	1.49896	1.43358	1.50547	1.40202	1.58154	1.39856	1.72066	1.92851	1.46112	1.46185	1.36097	1.48011	0.922082	1.62891	1.50532	1.0772	1.34837	1.67973	1.6172	1.43883	1.73099	1.70331	1.59261	1.40502	1.47638	1.51183	1.40213	1.47792	1.6883	1.54723	1.34341	1.40585	MPP_only
Atp5k	0.36202	0.528824	0.321561	0.687225	0.556376	0.430701	0.369864	0.378752	0.606233	0.450334	0	0.513576	0.777465	0.35604	0.333311	0.461309	0.61806	0.563756	0.689474	0.646136	0.482286	0.403315	0.284025	0.552289	0.669433	0.612356	0.620257	0.545187	0.401201	0.397258	0.5075	0.421187	0.542525	0.622992	0.591814	0.382131	0.453671	MPP_only
Aurka	0	0.624583	0	0.401521	0.0826227	0.34669	0.033551	0.0054962	0.116573	0.788586	0	0.13054	0	0.0324138	0.0238366	0.0244555	0.272698	0	0.0774757	0.0402078	0	0.0127859	0	0.728961	0	1.13524	0.143745	0	0.0198789	0.0200773	0.767895	0.0244119	0.426658	0.101926	0.0985443	0.0151998	0.0138195	MPP_only
Baiap2	0.169551	0.237756	0	0.401521	0.209723	0	0.223307	0.113903	0.0570411	0.125339	0	0.165069	0	0.23547	0.123742	0.286113	0.30822	0	0.254465	0.243996	0.396346	0.0939071	0	0.161886	0.0886095	0	0.199413	0.212559	0.211029	0.139754	0.162674	0.11717	0.125172	0.182295	0.118541	0.211733	0.0960913	MPP_only
Bcl2	0.450442	0.629748	0.137962	0.687225	0.665509	0.440261	0.541005	0.355912	0.29981	0.63028	0.592418	0.617892	1.14655	0.586511	0.352918	0.36624	0.446649	0	0.399008	0.477462	0.495312	0.374657	0.861256	0.671067	0.460367	0.818528	0.686672	1.0414	0.445912	0.365117	0.691791	0.369295	0.542686	0.724429	0.485787	0.585624	0.412426	MPP_only
Bcl2l11	0.162888	0.0802376	0.137962	0	0.121748	0.123574	0.145233	0.193323	0.354078	0.0602536	0	0.134384	0	0.108118	0.185287	0.86847	0.895566	0.32109	0.573619	0.436858	0.798225	0.34465	0.180734	0.0975709	0.129766	0	0.115608	0.116523	0.0981375	0.20849	0.0988593	0.299723	0.239709	0.121406	0.0713537	0.125711	0.115733	MPP_only
Bcl3	0.033547	0.234812	0	0.401521	0.211173	0.167076	0.234758	0.148302	0	0.0309303	0.720752	0.0279451	0	0.0675538	0.0286064	0.170521	0.206974	0	0.118672	0.0716694	0.140759	0.135957	0	0.0447838	0.141859	0	0.0558152	0.0768278	0.0562736	0.0352372	0.207412	0.90238	0.971718	0.235377	0.207701	0.189672	0.251381	MPP_only
Bend4	0.033547	0.0576943	0	0	0.0951468	0.233701	0.0473861	0.0341931	0.120145	0.0506114	0	0.0757838	0.61275	0.0508221	0.0276997	0.268476	0.236874	0	0.219172	0.0635507	0.140336	0.281985	0.271308	0.0490443	0.0304697	0	0.0802685	0	0.0473994	0.0429607	0.0419016	0.0249585	0.0341572	0.0588177	0.0203974	0.0401938	0.0356774	MPP_only
Bex4	0.183524	0.0699862	0	0.401521	0.178092	0	0.0372475	0.217712	0.557275	0.102956	0	0.137016	0	0.0625614	0.228571	0.142764	0.0778749	0	0.237535	0.0209938	0.0972394	0.4776	0.133236	0.0927413	0.199301	0	0.16901	0	0.0452937	0.261102	0.101811	0.132523	0.100464	0.169392	0	0.0507694	0.279359	MPP_only
Bex6	0.137457	0.555921	0.209267	0	0.478596	0.375459	0.355395	0.0664273	0.423562	0.490553	0.921783	0.499154	1.20102	0.450827	0.0703306	0.104146	0.219004	0	0.190814	0.109015	0.271292	0.00749754	0.138072	0.540998	0.340549	0.612356	0.480318	0.61129	0.450528	0.0715165	0.507651	0.319689	0.502706	0.508559	0.188248	0.422737	0.0468833	MPP_only
Birc5	0	1.71517	0	1.93574	0.773898	1.19483	0.0255541	0.0367696	0.110198	1.75512	0	0.802843	0	0.0306883	0.0167527	0.0431152	1.4791	0	0.828498	0.589454	0	0.0457522	0	1.73675	0.232991	1.87042	0.746209	0.744742	0.0219886	0.0299616	1.65721	0.139701	1.49427	0.703771	0.461458	0.0277066	0.0434447	MPP_only
Bnip2	0.238513	0.580137	0.358656	0.687225	0.538044	0.77953	0.465981	0.432259	0.273655	0.587609	0.720752	0.529937	0	0.408378	0.473503	0.370047	0.408777	0.32109	0.410066	0.330992	0.332015	0.435347	0	0.566799	0.334157	0.612356	0.478491	0.651546	0.446341	0.495841	0.631603	0.500708	0.6301	0.536389	0.508393	0.525256	0.471248	MPP_only
Bora	0.101998	0.518301	0	0	0.205533	0.315359	0.158341	0.139176	0.244055	0.596418	0.379251	0.228248	0	0.122508	0.186327	0.112555	0.288087	0	0.160823	0.227147	0.0794796	0.148631	0	0.613163	0.313354	0.352336	0.248797	0.193489	0.15786	0.170297	0.65894	0.0915231	0.286474	0.224799	0.167157	0.137259	0.103945	MPP_only
Btg1	0.588566	0.29528	0	0	0.200981	0.65666	0.255747	0.718572	0.679776	0.438381	0	0.286744	1.38098	0.38622	0.861527	0.702216	0.611888	0	0.363734	1.08266	0.856136	0.800241	0.538155	0.386191	0.585852	0.612356	0.268978	0.516659	0.430457	0.853938	0.50837	0.961955	0.754018	0.336175	0.63611	0.556281	0.871853	MPP_only
Capza1	0.395631	0.538443	0.49396	1.09071	0.49731	0.598541	0.466126	0.36388	0.52984	0.544122	0.379251	0.445799	0.227015	0.447415	0.318343	0.454737	0.588483	0	0.596289	0.638135	0.672863	0.245413	0.531305	0.550947	0.368408	0.352336	0.513339	0.69786	0.40104	0.333488	0.6548	0.459882	0.546036	0.537326	0.765421	0.430413	0.364564	MPP_only
Ccdc34	0.127074	0.873162	0	0.687225	0.607171	0.255195	0.175863	0.153558	0.309826	1.0132	0	0.751423	0.227015	0.289649	0.233111	0.232815	0.840387	0	0.638878	0.409505	0.263152	0.139522	0	1.0073	0.547189	0.612356	0.688931	0.710348	0.287116	0.211872	0.999056	0.242648	0.730485	0.65874	0.386496	0.278442	0.212134	MPP_only
Ccl4	0.457614	0.115159	0.531373	0	0.126581	0.110743	0.214037	0.375397	0.499325	0.204631	0.341502	0.269926	0	0.432555	0.523274	0.600585	0.516482	0	0.405782	0.857475	1.50624	0.48533	0.707267	0.198326	0.554389	0.989372	0.17263	0.116523	0.330398	0.427356	0.474333	2.22814	1.93883	0.47882	0.336963	0.885406	0.740042	MPP_only
Ccna2	0	1.12004	0	1.09071	0.472433	0.712121	0.014004	0.0103063	0.142313	1.15667	0	0.46954	0	0.00909531	0.0109635	0.0233927	0.955636	0	0.463477	0.366014	0	0.0116341	0	1.14221	0.262265	0.818528	0.437587	0.49556	0.0179358	0.00518849	1.18644	0.10595	0.9755	0.466567	0.268216	0.014164	0.0258311	MPP_only
Ccnb1	0	1.04166	0	0.401521	0.117965	0.154635	0.0399441	0.0298279	0	1.02806	0	0.15851	0	0.0494021	0.0204159	0.0247416	0.616773	0	0.143218	0.171717	0.0953121	0.0143411	0	1.0729	0.0304697	0.818528	0.180495	0.272657	0.045963	0.0230881	1.08708	0.0326531	0.755493	0.151429	0.197126	0.0362959	0.0245987	MPP_only
Ccnd2	1.37549	0.934198	1.3441	0.687225	1.17083	0.638768	1.29156	1.26481	1.38558	0.732625	0.964229	1.0437	1.44103	1.07563	1.23589	1.06471	0.658521	0.32109	0.862291	0.515733	1.1924	1.28134	0.943599	0.693398	1.51745	2.24577	0.943546	0.663055	1.07298	1.17696	1.04253	1.9616	1.53495	1.32307	0.806085	1.50448	1.5464	MPP_only
Ccnf	0.033547	0.458408	0	0.401521	0.142618	0.397085	0.0365975	0.0154109	0	0.525095	0	0.160489	0.227015	0.0281503	0.00855752	0.0152936	0.146508	0	0.0720115	0.0526869	0.0232394	0.00646603	0	0.505596	0.036373	0.818528	0.1622	0.116523	0.0319057	0.0209704	0.50401	0.0220234	0.259258	0.165425	0.0427446	0.0270352	0.0196267	MPP_only
Cd27	0.98019	0.982203	0.577253	0.401521	0.775703	0.205782	0.939825	0.770668	0.884459	1.29393	1.69784	1.00861	0.777465	1.22684	0.917799	0.896003	1.03846	0	0.768535	0.449267	0.996936	0.701715	1.08046	1.23457	0.909431	0.989372	0.988567	0.640888	1.26036	0.980295	1.19891	0.794883	0.845247	0.918001	0.252319	1.20968	0.919684	MPP_only
Cd34	1.75221	1.73691	1.51438	1.78187	1.68146	0.776692	1.81998	1.17373	1.51999	1.87532	1.53797	1.75171	1.42806	1.97814	1.34404	1.87917	1.89093	0	1.71364	1.10103	2.00124	0.938391	1.85695	1.85753	1.75239	1.37541	1.76436	1.48124	2.04582	1.30089	1.85728	1.46906	1.59643	1.7413	0.818309	1.96537	1.17875	MPP_only
Cd37	1.17228	0.79119	0.918223	0	0.810124	0.919581	1.03709	0.634137	0.854014	0.86491	1.39856	0.860733	1.65105	1.24058	0.817142	0.894335	0.744414	0.32109	0.724352	0.822542	0.867203	0.471946	0.811321	0.868549	0.798105	1.13524	0.954266	0.814956	1.25538	0.763831	0.812325	0.716047	0.70455	0.860784	0.911094	1.10062	0.682984	MPP_only
Cd48	0.321481	0.897256	0.537452	1.24429	0.992123	1.28749	0.792415	0.106313	0.0668688	0.715599	1.6526	0.848464	2.07596	0.673633	0.109411	0.317431	0.482456	0.32109	0.598689	0.721758	0.721163	0.0173999	0.274098	0.740962	0.460768	0.612356	0.841676	1.23783	0.670873	0.0951114	0.710243	0.54638	0.827079	0.903137	1.08458	0.679654	0.0773574	MPP_only
Cd53	0.832638	0.885562	0.797404	0.90918	0.759337	0.821927	1.03042	0.640792	0.619999	0.591458	0.933919	0.577653	1.36073	0.752684	0.311598	0.700911	0.711464	0.922082	0.533969	1.25076	1.09144	0.338794	0.475571	0.69475	0.627088	1.37541	0.593224	0.739026	0.832921	0.343704	0.748242	0.982508	0.929651	0.684488	1.13991	0.775215	0.360335	MPP_only
Cd69	0.149789	0.286464	0.603117	0	0.351323	0.0780734	0.286133	0.183791	0.215942	0.522933	0	0.516705	0.777465	0.517158	0.261785	0.486601	0.585172	0.32109	0.318627	1.04718	0.700432	0.25463	0	0.473795	1.21357	1.65324	0.512289	0.374158	0.459546	0.327953	1.01527	2.75928	2.81183	0.999043	1.03318	1.10471	0.583551	MPP_only
Cd9	0.257294	0.514619	0.256861	0	0.240881	0.959069	0.208945	0.51652	0.523869	0.716095	0.933919	0.368873	1.20186	0.340915	0.627388	0.357284	0.502359	0	0.336428	1.00522	0.273095	0.650051	0.518159	0.584003	0.246303	0.352336	0.272287	0.698207	0.273351	0.618862	0.611812	0.345337	0.407256	0.246274	1.09079	0.284195	0.581697	MPP_only
Cd93	0.339052	0.506816	0.209267	0.401521	0.325065	0.215471	0.307385	0.244163	0.427708	0.809584	0.592418	0.526728	0	0.627364	0.460429	0.790873	0.931405	0.32109	0.641636	0.35827	0.693389	0.326956	0.56058	0.854457	0.365664	0.352336	0.555603	0.717913	0.635893	0.463479	0.930806	0.331686	0.629999	0.628891	0.371382	0.741397	0.497568	MPP_only
Cdc20	0.290758	1.36584	0	0	0.266944	0.562274	0.121798	0.0959365	0.120145	1.44461	0.720752	0.302707	0	0.0767582	0.0708994	0.0586125	0.910321	0	0.19417	0.183998	0.113197	0.0450519	0	1.50801	0.102088	1.73099	0.303638	0.272657	0.0753249	0.0929635	1.39536	0.0930892	0.978012	0.246035	0.270187	0.0920107	0.0859103	MPP_only
Cdca2	0.134642	0.61323	0.0783793	0	0.23597	0.287434	0.0555894	0.0343005	0.214084	0.695495	0	0.291611	0.227015	0.0447058	0.0518297	0.0352934	0.335078	0	0.170287	0.130893	0.0189105	0.0148492	0.133236	0.696176	0.126683	0.989372	0.279033	0.0769661	0.052156	0.0272776	0.7773	0.0545994	0.443778	0.266314	0.119523	0.0437172	0.029039	MPP_only
Cdca8	0.033547	1.61863	0	1.69504	0.633976	0.963067	0.043393	0.0289913	0.345756	1.67464	0	0.711442	0.394895	0.0492466	0.0396489	0.0675362	1.43602	0	0.677593	0.475168	0.0193091	0.0369417	0	1.67488	0.130152	2.10176	0.657724	0.710899	0.0463181	0.0433504	1.58128	0.143589	1.37345	0.601125	0.408929	0.0518256	0.0628582	MPP_only
Cdk1	0.0586226	1.43636	0	1.09071	0.848808	0.9515	0.122956	0.0662135	0.12391	1.56524	0	0.887133	0	0.137499	0.100629	0.117944	1.07272	0	0.827772	0.411597	0.071163	0.0607641	0	1.59735	0.390342	1.99277	0.896811	0.584078	0.102142	0.101448	1.54487	0.255895	1.52895	0.833679	0.514973	0.0902123	0.0697314	MPP_only
Cdk2ap1	0.471458	0.668116	0.178481	0.687225	0.841203	0.636065	0.650824	0.448315	0.712713	0.659294	0	0.859499	0.50104	0.550704	0.384836	0.332447	0.394894	0.32109	0.515042	0.487859	0.392475	0.163216	0.369012	0.72423	0.545551	1.13524	0.840314	0.418593	0.552111	0.390643	0.631512	0.508486	0.646127	0.755471	0.723971	0.491795	0.374743	MPP_only
Cdk6	1.10444	1.57261	0.916437	0.401521	1.43754	0.684525	1.42908	0.925221	0.747232	1.37352	1.70562	1.24042	0.50104	1.1649	0.675857	1.1369	1.46482	0	1.4291	1.29876	1.2243	0.543724	1.22577	1.48673	0.875113	1.65324	1.32111	1.00977	1.10801	0.62964	1.61719	1.34713	1.64286	1.57735	1.23844	1.27401	0.80308	MPP_only
Cdkn2c	0	0.31986	0	0	0.115735	0.532502	0.0460055	0.0221558	0	0.42213	0	0.186049	0	0.0888591	0.0494273	0.0852769	0.278504	0.32109	0.198542	0.261651	0.0893068	0.0338513	0.133236	0.486684	0.0304697	0.612356	0.177922	0.255726	0.0733686	0.0884002	0.446017	0.0502772	0.248042	0.18622	0.124028	0.0725455	0.0638584	MPP_only
Cdkn3	0	0.532278	0	0	0.0268775	0.352829	0.00594185	0.00931516	0	0.736449	0	0.0643625	0.394895	0.011154	0.0032109	0.00736997	0.445473	0	0.0423104	0.109955	0.0211925	0.00487514	0	0.711441	0	0.989372	0.0618203	0.404054	0.00196802	0.00592703	0.622233	0.0114025	0.494986	0.0500183	0.191745	0.0130943	0.0105307	MPP_only
Cebpg	0.259041	0.439384	0.209267	0	0.413313	0.32165	0.359713	0.322941	0.292539	0.379338	0.68552	0.372319	0.394895	0.330635	0.213356	0.161399	0.18961	0	0.231091	0.151911	0.193287	0.137826	0	0.405276	0.39284	0.352336	0.377921	0.348242	0.314896	0.278758	0.41868	0.309695	0.40822	0.386669	0.473427	0.309408	0.291056	MPP_only
Cebpz	0.748121	0.76316	0.875221	0.401521	0.807761	0.440697	0.803852	0.824316	0.439669	0.440828	1.13495	0.64777	0.895935	0.557998	0.675164	0.686247	0.591682	0	0.740862	0.489659	0.863998	0.653764	0.524302	0.455605	0.565632	0.352336	0.626613	0.848788	0.611025	0.682906	0.551923	0.745606	0.684504	0.678886	0.437887	0.606318	0.672547	MPP_only
Cenpa	0.350278	1.52695	0.178481	0.401521	0.12622	0.562063	0.109406	0.244307	0.498127	1.76729	0.379251	0.180462	0.227015	0.181751	0.324288	0.506107	1.57067	0	0.386147	0.7187	0.544172	0.437274	0.435113	1.7224	0.109342	1.26252	0.190365	0.642937	0.148064	0.291884	1.72434	0.0999011	1.14763	0.188912	0.54368	0.193054	0.219859	MPP_only
Cenpc1	0.101099	0.472418	0	0	0.189085	0.296145	0.137468	0.148206	0.263768	0.57574	0	0.239674	0.50104	0.170311	0.153795	0.123985	0.354437	0	0.189655	0.113987	0.129036	0.174479	0	0.544376	0.0740969	0.612356	0.261785	0.116523	0.121031	0.142777	0.571847	0.11237	0.383589	0.242751	0.171616	0.163451	0.154598	MPP_only
Cenpe	0.166807	0.978466	0	0	0.164165	0.490794	0.0347423	0.0620233	0	1.1289	0	0.21948	0	0.107779	0.0657329	0.0499912	0.667162	0	0.210106	0.287156	0.101836	0.0434583	0	1.15859	0.128281	1.65324	0.25819	0.400088	0.0780547	0.0744826	1.21218	0.118754	1.05932	0.285619	0.236449	0.104475	0.0370235	MPP_only
Cenpf	0	1.64174	0	0.687225	0.27429	0.377689	0.0335456	0.0482674	0	1.73874	0	0.400266	0	0.0498415	0.027095	0.0459581	1.28498	0	0.344788	0.309187	0	0.0185977	0	1.78409	0.0304697	1.65324	0.325127	0	0.0339279	0.0318167	1.7543	0.0870476	1.24129	0.328838	0.276038	0.078232	0.0490152	MPP_only
Cenpl	0	0.302818	0	0.401521	0.0801019	0.308003	0.0259249	0.034986	0	0.479774	0	0.134417	0	0.0584068	0.0593825	0.026322	0.171447	0	0.0914761	0.153524	0.0841992	0.0681687	0	0.504929	0	0.989372	0.138204	0.212511	0.0428544	0.0830736	0.488654	0.0699701	0.304885	0.13566	0.056265	0.0460358	0.0623152	MPP_only
Cep57l1	0.068451	0.364042	0.177517	1.24429	0.257832	0.235268	0.199116	0.181111	0.311516	0.521904	0.592418	0.375292	0.227015	0.330396	0.211121	0.190048	0.315535	0	0.255995	0.163401	0.28946	0.173501	0.318806	0.528494	0.325515	0	0.393776	0.172816	0.290767	0.263992	0.527612	0.249855	0.395683	0.406543	0.245056	0.306625	0.303144	MPP_only
Cggbp1	0.748518	0.589987	0.177517	0	0.548502	0.71144	0.512063	0.501978	0.357801	0.689306	0.741395	0.526752	0	0.460216	0.569675	0.43776	0.54736	0	0.52561	0.52176	0.343226	0.48897	0.583111	0.605493	0.498239	0.818528	0.553738	0.231719	0.512896	0.582619	0.676191	0.664465	0.631276	0.583843	0.555066	0.507715	0.588564	MPP_only
Chchd2	2.30109	2.27942	2.1739	2.18667	2.31498	2.09211	2.1323	2.14136	1.88616	2.23826	2.3008	2.28811	2.02657	2.07038	2.06386	1.92819	2.05353	1.06235	2.06193	2.01159	1.94631	1.80406	2.33159	2.24904	1.99202	2.28951	2.26499	2.4373	2.07924	2.04612	2.18178	2.02709	2.14166	2.25584	2.24887	2.04483	1.89231	MPP_only
Chka	0.403167	0.324701	0.255896	0.401521	0.289705	0.0780734	0.333049	0.363299	0.244648	0.269312	0	0.256185	0.38257	0.22751	0.33205	0.432156	0.464832	0	0.445659	0.358228	0.31511	0.433528	0.311803	0.270398	0.16669	0	0.257786	0.231501	0.229361	0.357978	0.327295	0.220062	0.246829	0.312587	0.211354	0.203757	0.359033	MPP_only
Cit	0.0675525	0.5488	0	0	0.26709	0.543537	0.0329179	0.0209632	0	0.688887	0	0.313314	0	0.0287755	0.0210393	0.0378937	0.531725	0	0.258642	0.112157	0	0.0319868	0.138072	0.66087	0.036373	1.13524	0.3221	0.344614	0.0403105	0.0189785	0.696112	0.067504	0.508968	0.334953	0.199683	0.0569257	0.0238345	MPP_only
Ckap2	0.033547	0.54438	0	0.401521	0.176518	0.225123	0.068868	0.0507248	0	0.683181	0	0.220058	0	0.0773628	0.0362708	0.0441566	0.430646	0	0.160282	0.140229	0.029114	0.0130896	0	0.677424	0.036373	0.612356	0.198523	0	0.04407	0.0374367	0.696444	0.0679457	0.457298	0.20406	0.101796	0.0499366	0.0501829	MPP_only
Ckap2l	0	0.697847	0	0	0.175459	0.25115	0.0108859	0.00828733	0.142313	0.861925	0	0.294591	0	0.013066	0.0109089	0.0239512	0.572788	0	0.251901	0.0875345	0.0313042	0	0	0.852109	0.0304697	0.612356	0.248443	0.116523	0.0125407	0.0162439	0.866491	0.0322835	0.549244	0.240463	0.180076	0.00690941	0.0123899	MPP_only
Ckap5	0.223125	0.927211	0	0	0.324703	0.487422	0.187056	0.262902	0.244648	1.05586	0.379251	0.334614	0	0.209915	0.206887	0.18993	0.791171	0	0.356394	0.199537	0.266344	0.20571	0.133236	1.0006	0.373201	1.13524	0.335047	0.193351	0.163	0.204038	0.994302	0.213586	0.77908	0.31274	0.240897	0.186228	0.216828	MPP_only
Cklf	0.256162	0.286483	0	0.401521	0.291989	0.394937	0.244238	0.177067	0.238049	0.409786	0	0.375068	0.38257	0.305922	0.199083	0.172569	0.259647	0	0.196046	0.18944	0.102811	0.156019	0.424887	0.467834	0.387044	0.352336	0.381002	0.329082	0.313121	0.282349	0.409447	0.218871	0.305979	0.359581	0.326681	0.284317	0.227724	MPP_only
Cks2	0.284305	1.94481	0.209267	0.687225	0.795758	1.39869	0.409074	0.31133	0.535292	2.16823	0.341502	0.95174	0.227015	0.403559	0.424092	0.396939	1.59059	0	0.899059	1.30648	0.562463	0.279605	0.629009	2.1549	0.392861	2.4103	0.916257	1.11666	0.375423	0.368839	2.08963	0.520303	1.80769	0.876452	1.26142	0.380281	0.303453	MPP_only
Cnn3	0.0675525	0.179209	0	0	0.165948	0.078173	0.149509	0.0295465	0.214025	0.203605	0.379251	0.158226	0	0.225001	0.0220166	0.267404	0.393021	0	0.261262	0.105931	0.296806	0.164077	0	0.236244	0.0304697	0	0.21164	0.279266	0.178415	0.0272711	0.252456	0.081093	0.245582	0.28086	0.0728764	0.196331	0.0297733	MPP_only
Cnot1	0.372015	0.552684	0	0.401521	0.507835	0.333567	0.442607	0.454625	0.507785	0.580804	0.720752	0.447583	0.621911	0.402675	0.386165	0.464667	0.668364	0	0.579919	0.435858	0.305742	0.452414	0.763845	0.599818	0.483645	0.352336	0.446837	0.193489	0.41362	0.417283	0.660725	0.445863	0.613148	0.540304	0.275025	0.450559	0.452676	MPP_only
Copa	0.187161	0.450246	0.386784	0.401521	0.413997	0.244106	0.448723	0.449996	0.487734	0.439566	0	0.448586	0.895935	0.367956	0.3962	0.416096	0.593829	0	0.503336	0.438857	0.352174	0.386359	0.635488	0.490858	0.305063	0	0.438733	0.457268	0.405423	0.434642	0.525359	0.365552	0.461152	0.479449	0.45515	0.435952	0.415315	MPP_only
Coq10b	0.222615	0.205391	0.0783793	0	0.250275	0.255471	0.197436	0.521691	0.166782	0.262704	0	0.220372	0	0.187276	0.56469	0.419968	0.456606	0	0.353389	0.278189	0.274162	0.553776	0.133236	0.203326	0.15029	0	0.185494	0.172954	0.16924	0.559619	0.173724	0.406623	0.303535	0.16909	0.154138	0.220687	0.463037	MPP_only
Creg1	0.950536	0.898078	0.700121	1.09071	0.89632	1.04401	0.875104	1.02702	0.930782	0.982159	1.74579	1.00096	0.677045	0.975446	1.0945	0.80942	0.781776	0.563756	0.821158	1.08441	0.94562	0.89312	0.887227	0.943415	1.0644	0.818528	0.939558	1.32623	0.997892	1.09698	0.922901	0.799001	0.777074	0.894943	1.18429	0.93185	1.04971	MPP_only
Crlf3	0.381753	0.752093	0.41062	1.3774	0.678635	0.35271	0.730097	0.764757	0.87128	0.916308	0.720752	0.737472	0.50104	0.947071	0.93921	0.743418	0.731436	0	0.662491	0.658092	0.742091	0.811373	0.709674	0.94123	0.909966	0.352336	0.771292	0.349485	1.01028	0.991856	0.948544	0.685009	0.793993	0.834561	0.586021	1.00013	0.94582	MPP_only
Ctr9	0.227619	0.53329	0.0783793	0.90918	0.481129	0.522732	0.432797	0.323491	0.401919	0.473943	0	0.448102	0	0.396006	0.263418	0.244807	0.298036	0	0.32696	0.22999	0.178671	0.224901	0.294251	0.495337	0.369346	1.13524	0.441816	0.435493	0.348	0.258997	0.564276	0.283844	0.411481	0.486079	0.21325	0.393048	0.250453	MPP_only
Cyfip2	0.571465	0.444181	0.465163	0	0.483898	0.342918	0.428378	0.339383	0.483282	0.570352	0.341502	0.522008	0.839766	0.47033	0.426485	0.681336	0.751018	0	0.643163	0.521421	0.582415	0.53131	0.429779	0.60875	0.689572	0.612356	0.476902	0.255726	0.500336	0.440816	0.6491	0.552937	0.622764	0.635107	0.459239	0.559208	0.525033	MPP_only
Cyth1	0.0760195	0.122525	0.178481	0	0.0757388	0.0384008	0.0968335	0.103721	0.116632	0.166767	0	0.123504	0	0.124312	0.116628	0.308971	0.321596	0.32109	0.243928	0.354612	0.413974	0.248734	0.271308	0.171821	0.15262	0	0.117615	0.116523	0.143997	0.169216	0.185677	0.121275	0.165286	0.119332	0.107018	0.184467	0.152004	MPP_only
Cyth4	0.32317	0.295937	0.321561	0	0.283579	0.58645	0.403606	0.301146	0.189169	0.330224	0.341502	0.26611	0.777465	0.437423	0.332627	0.356096	0.301025	0	0.255035	0.255287	0.489015	0.54808	0.382281	0.304589	0.432611	0.352336	0.276202	0.515815	0.483289	0.335936	0.303642	0.169448	0.180695	0.290139	0.582935	0.459491	0.323859	MPP_only
D030056L22Rik	0.104501	0.494693	0.0783793	0	0.424531	0.468967	0.304549	0.213327	0.428148	0.573703	0.341502	0.378654	0.621911	0.209071	0.200312	0.129872	0.284878	0	0.26766	0.201132	0.165992	0.138089	0.133236	0.528101	0.42866	0.612356	0.378296	0.435493	0.222587	0.224701	0.494513	0.223459	0.445236	0.350806	0.15694	0.219632	0.199577	MPP_only
Ddx17	0.581612	0.678415	0.640212	0.90918	0.547411	0.482767	0.659727	0.656445	0.221362	0.583205	0.379251	0.499726	0.38257	0.587328	0.555143	0.458901	0.448463	0	0.408526	0.310044	0.524536	0.624403	0.379993	0.535735	0.363533	0.989372	0.47024	0.541805	0.556262	0.54752	0.614016	0.526076	0.503208	0.508123	0.463466	0.567994	0.655451	MPP_only
Ddx21	0.741132	0.730455	0.852934	0	0.888077	0.341051	0.864308	0.742164	0.381323	0.367893	0	0.514	0.777465	0.429255	0.323405	0.445138	0.417031	0.32109	0.653156	0.435369	0.455068	0.527997	0.531305	0.342861	0.574788	0.612356	0.582966	0.408169	0.38659	0.346231	0.426543	0.728977	0.664618	0.645041	0.593237	0.443651	0.450938	MPP_only
Ddx3x	0.640451	0.604863	0.386784	0	0.563619	0.775077	0.541415	0.622079	0.56845	0.569571	0	0.514852	0.38257	0.454352	0.613509	0.711626	0.693496	0.922082	0.686953	0.738364	0.416584	0.672328	0.696195	0.509042	0.661281	0.612356	0.470106	0.801444	0.428903	0.603359	0.666469	0.648541	0.678591	0.586511	0.619684	0.532328	0.628852	MPP_only
Dhrs3	0.159858	0.16137	0.209267	0.687225	0.140567	0.0532417	0.182263	0.0626611	0.0974522	0.345193	0	0.238509	0.621911	0.397209	0.131452	0.489982	0.507028	0	0.274382	0.166974	0.569212	0.240889	0	0.325684	0.168149	0	0.243753	0.289339	0.405102	0.148139	0.30267	0.124246	0.182464	0.216848	0.159342	0.36911	0.107049	MPP_only
Diaph1	0.781913	0.714758	0.700121	0.90918	0.579318	0.466029	0.601926	0.900418	0.701913	0.730656	0.341502	0.703677	0	0.622445	0.781713	0.682816	0.834047	0	0.687877	0.625987	0.655891	1.00459	0.845297	0.746217	0.525673	0.612356	0.601699	0.504158	0.61792	0.823739	0.829818	0.682694	0.717493	0.605222	0.505246	0.648484	0.821991	MPP_only
Dlgap5	0	0.419059	0.178481	0	0.120143	0.338425	0.0183974	0.0140171	0	0.641989	0	0.180916	0	0.027998	0.0213408	0.0149438	0.393077	0	0.0988757	0.0872661	0.0410799	0.00669893	0.133236	0.636642	0.0914384	0	0.171531	0.368645	0.0262104	0.0227386	0.604531	0.0458126	0.412157	0.148113	0.10195	0.0150996	0.0162569	MPP_only
Dtl	0.622576	0.311478	0	0.401521	0.848061	0.508777	0.481975	0.270012	0.549721	0.386268	0.341502	0.861606	0.99532	0.34314	0.29743	0.311837	0.715475	0	1.03466	0.475746	0.292104	0.237933	0.645802	0.357325	0.509092	0.352336	0.785339	0.563818	0.282375	0.284196	0.351453	0.334352	0.339543	0.888919	0.378204	0.294547	0.237416	MPP_only
Dusp1	0.777695	0.252094	0.178481	0	0.252863	0.316736	0.229485	1.00685	0.870496	0.544062	0.921783	0.413044	0	0.383736	1.26726	1.03425	0.871163	1.48335	0.784077	1.1219	0.91749	1.44825	1.04502	0.408986	0.795515	0.352336	0.327202	0.5152	0.330269	1.45197	0.458417	0.834457	0.505802	0.414678	0.419533	0.505578	1.31264	MPP_only
Dusp5	0.384542	0.125926	0.0783793	0	0.13708	0	0.163921	0.293155	0.765434	0.115092	0	0.12181	0	0.15594	0.352636	0.405002	0.434938	0	0.303786	0.291194	0.473569	0.308183	0	0.106123	0.0743521	0	0.0979478	0	0.124366	0.418174	0.119794	0.261951	0.227452	0.138227	0.0533444	0.180713	0.20889	MPP_only
Dynlt1f	0.368429	0.29367	0	0.687225	0.292164	0.47535	0.185819	0.171239	0.166782	0.360751	0.341502	0.341413	0	0.227818	0.247666	0.307503	0.553175	0	0.469465	0.500911	0.416703	0.253074	0.138072	0.406763	0.243353	0.352336	0.371695	0.474957	0.259187	0.169523	0.460369	0.233061	0.418035	0.367932	0.390257	0.280844	0.19711	MPP_only
Ect2	0	0.46632	0	0	0.103875	0.206213	0.0161703	0.023114	0	0.548434	0.379251	0.144735	0.394895	0.0319688	0.0173419	0.0275744	0.385953	0	0.159696	0.0882487	0.0193091	0.00429041	0	0.595219	0	0.612356	0.146999	0.195691	0.0319841	0.0340233	0.605335	0.0475156	0.548618	0.173978	0.166001	0.0334606	0.0336857	MPP_only
Efhd2	0.476406	0.468149	0.178481	0.687225	0.475179	0.907763	0.412308	0.393162	0.454535	0.295119	0	0.393386	0.839766	0.33166	0.291252	0.469289	0.48301	0	0.491191	0.595688	0.362973	0.432424	0.133236	0.355808	0.482378	0.818528	0.398301	0.249782	0.338367	0.302237	0.399441	0.332809	0.383667	0.365736	0.656827	0.350674	0.285455	MPP_only
Eif3c	1.16131	1.29203	0.841891	1.09071	1.21398	1.12267	1.10757	1.0735	0.806197	1.10953	0.341502	1.05065	1.28979	0.912497	0.887653	0.998128	1.14572	0	1.19596	0.989364	0.920117	0.892209	0.973742	1.07845	1.12718	1.13524	1.09534	1.13816	0.92337	0.90221	1.17239	1.04668	1.17054	1.11283	1.07475	1.00934	0.859046	MPP_only
Elovl5	0.068451	0.182061	0	0	0.164841	0.374986	0.114575	0.123299	0.187606	0.239099	0	0.167845	0.621911	0.172294	0.112367	0.354191	0.427097	0	0.327724	0.303133	0.337936	0.275852	0.218979	0.253973	0.0842427	0	0.208416	0.172816	0.183018	0.124275	0.279576	0.180467	0.263807	0.258645	0.303813	0.198762	0.11455	MPP_only
Emc7	0.629129	0.59374	0.805987	0.90918	0.616494	0.68497	0.489643	0.503658	0.520131	0.53593	0	0.548736	0.99532	0.385995	0.474341	0.543425	0.67582	0	0.601594	0.593719	0.556748	0.601316	0	0.518279	0.339667	0.818528	0.552377	0.620972	0.467777	0.437826	0.498684	0.479456	0.600935	0.510429	0.553274	0.461339	0.412895	MPP_only
Eno1	0.42224	0.61511	0.178481	0.90918	0.723013	0.714833	0.613418	0.567604	0.896585	0.519874	0	0.739817	0.839766	0.547932	0.544638	0.723391	0.727979	0	0.906456	0.924248	0.651826	0.638502	0.582266	0.603789	0.522524	0.989372	0.759269	0.816369	0.619025	0.55495	0.591596	0.567585	0.625594	0.760732	0.74755	0.605285	0.551315	MPP_only
Erh	0.80289	0.784077	0.458759	1.24429	0.960725	0.666577	0.696729	0.583047	0.473503	0.551417	0.933919	0.737997	0.991642	0.480526	0.424869	0.844701	0.970643	0	1.26799	0.916448	0.83875	0.567496	0.486597	0.665821	0.731805	0.612356	0.919848	0.908002	0.538759	0.439947	0.630739	0.638335	0.742951	0.934897	0.678702	0.520193	0.401441	MPP_only
Esco2	0	0.391261	0	0.90918	0.301259	0.549073	0.00737281	0.00423658	0.0668688	0.573782	0.341502	0.382809	0	0.0017823	0.00928449	0.0119782	0.278477	0	0.293047	0.0936039	0	0	0	0.52005	0.0522366	0.352336	0.34666	0.195691	0.00496865	0.00627254	0.436223	0.0649225	0.42185	0.349007	0.0593964	0.00464906	0	MPP_only
Fam136a	0.496867	0.511338	0.0783793	0.401521	0.65759	0.389452	0.581671	0.435773	0.313938	0.237607	0.379251	0.46557	0.38257	0.400722	0.241126	0.216193	0.200905	0	0.285285	0.198657	0.327075	0.162081	0.50136	0.264334	0.368498	0.612356	0.396322	0.61047	0.381312	0.276514	0.24171	0.360288	0.301626	0.412331	0.438772	0.305273	0.247148	MPP_only
Fam160b1	0.225798	0.252074	0.209267	0	0.187268	0.175515	0.21084	0.263552	0.407089	0.220701	0	0.212974	0	0.224834	0.224427	0.315199	0.430422	0.32109	0.274214	0.230185	0.237685	0.285754	0.299086	0.261431	0.0436273	0	0.188586	0.212511	0.288041	0.26889	0.329583	0.135743	0.204181	0.227384	0.185565	0.309292	0.270826	MPP_only
Fam69b	1.07685	0.704364	0.634603	0.401521	0.866819	0.256137	0.839865	0.664454	1.06214	0.712245	0.542532	0.825875	0.227015	0.824264	0.714707	1.02603	0.893919	0	0.945323	0.377488	0.806803	0.703332	0.537906	0.654279	0.70388	1.13524	0.810256	0.360867	0.875105	0.681522	0.686647	0.360152	0.37751	0.8007	0.163508	0.781382	0.653089	MPP_only
Fau	3.36207	3.28732	3.0724	3.33844	3.20812	3.45352	3.42301	3.47623	3.58422	3.39089	3.38287	3.30605	3.62351	3.55888	3.55682	3.40969	3.29725	2.6023	3.20261	3.54434	3.3865	3.51959	3.40188	3.3895	3.44986	3.30277	3.30948	3.57176	3.56203	3.58505	3.38212	3.33994	3.25065	3.26914	3.59595	3.52024	3.54441	MPP_only
Fbxo5	0	0.636032	0	0	0.395404	0.72988	0.0697534	0.0422395	0	0.767877	0	0.448731	0	0.0648383	0.0529277	0.0581479	0.341997	0	0.346473	0.158147	0.134867	0.0258341	0	0.821467	0.101764	1.47684	0.46985	0.538835	0.0729507	0.0412113	0.697601	0.090111	0.363166	0.391207	0.0825922	0.0503119	0.0256117	MPP_only
Fignl1	0.234578	0.410559	0.178481	1.09071	0.548308	0.48293	0.226988	0.0823471	0.0570411	0.382478	0	0.597463	0.394895	0.14445	0.0610909	0.0694937	0.258663	0	0.34733	0.135812	0.060807	0.0330625	0	0.450528	0.307099	0.818528	0.537231	0.388387	0.140083	0.0648894	0.431754	0.159617	0.416825	0.544447	0.184923	0.109598	0.0417582	MPP_only
Fmnl1	0.322654	0.432779	0	0.401521	0.291688	0.262324	0.332154	0.266937	0.116632	0.519705	0.933919	0.339684	0.621911	0.395802	0.325738	0.499835	0.69558	0	0.459266	0.518939	0.496127	0.408419	0.369767	0.471191	0.306473	0.352336	0.343893	0.504158	0.411632	0.394162	0.578321	0.318744	0.481388	0.390726	0.246024	0.473265	0.413746	MPP_only
Fth1	3.32986	3.00202	2.90549	3.05673	3.25639	2.98792	3.26207	3.27051	3.4073	3.0827	3.27352	3.25139	3.33974	3.22528	3.28193	3.49192	3.28643	1.71264	3.38162	3.08686	3.43167	3.35988	3.30022	2.99555	3.14527	2.83619	3.19191	2.89035	3.22672	3.30092	2.94759	3.05731	2.86707	3.1822	2.82981	3.20101	3.17849	MPP_only
Fubp1	1.26012	1.49859	1.40082	1.3774	1.50872	1.33965	1.52286	1.47859	0.930736	1.15223	0.921783	1.25196	0.895935	1.1979	1.02632	0.957907	0.981289	0.32109	1.16484	0.742031	0.91564	0.852991	1.58207	1.14599	1.04615	1.87042	1.27374	1.09554	1.1361	1.01019	1.13257	1.14239	1.16092	1.24336	0.697298	1.15394	1.0404	MPP_only
G2e3	0	0.424949	0	0	0.0836838	0.154412	0.0757907	0.0840296	0	0.569319	0	0.0884028	0	0.0635925	0.0842035	0.0765285	0.209508	0	0.0649059	0.103064	0.0698581	0.0705187	0	0.540943	0.262246	1.13524	0.120773	0.135731	0.0869618	0.0689493	0.639488	0.0831976	0.303534	0.10722	0.104009	0.0944855	0.096255	MPP_only
Gapdh	2.72586	2.47097	2.4512	2.95915	2.84111	2.6688	2.52148	2.37695	2.67781	2.61363	2.77679	2.93268	2.78907	2.52654	2.49042	2.47264	2.47831	1.18533	2.81717	2.74071	2.32155	2.10566	2.68994	2.6187	2.48436	2.48341	2.96731	3.11533	2.59999	2.45857	2.44078	2.41225	2.51438	2.86531	2.74937	2.46915	2.30458	MPP_only
Gas2l3	0.033547	0.486361	0	0.401521	0.113374	0.14494	0.0263581	0.0814925	0	0.569979	0	0.146644	0	0.0576341	0.0726003	0.0852515	0.249462	0	0.148814	0.0930487	0.0454861	0.223032	0	0.554043	0.0436273	0	0.144506	0	0.059548	0.113033	0.634789	0.0283482	0.228307	0.125568	0.0910294	0.0488607	0.113478	MPP_only
Gfod1	0.237447	0.0956179	0	0	0.0636495	0.152781	0.101357	0.0632098	0.1759	0.0621515	0	0.0807163	0.61275	0.0708692	0.073424	0.233738	0.298548	0	0.185305	0.205498	0.177685	0.113294	0.180734	0.0936575	0.158368	0	0.0751246	0.195691	0.0779746	0.0785892	0.0874649	0.0286354	0.0454096	0.0782815	0.143532	0.0722224	0.0603614	MPP_only
Gm10076	0.654801	0.759188	0.49396	0.401521	0.788066	1.0052	0.756974	0.684121	0.627456	0.865809	0.542532	0.819956	0	0.736675	0.741171	1.71631	1.82424	1.56576	1.80339	1.80848	1.6281	1.70566	0.819615	0.985345	0.823222	0.818528	0.903225	0.863649	0.84512	0.785219	1.03953	0.856496	0.92715	0.995692	0.918099	0.890157	0.830772	MPP_only
Gm42418	1.35754	1.83963	1.40365	2.82204	1.63013	1.98495	1.56608	1.51047	1.65143	1.76743	1.46881	1.56969	1.55418	1.65445	1.653	1.14926	1.31515	0.563756	1.21333	1.26995	1.26555	1.28121	1.89485	1.75256	1.75367	1.37541	1.62963	1.56995	1.73981	1.66856	1.60837	1.31686	1.56884	1.42204	1.40154	1.32586	1.33426	MPP_only
Gm5111	0.57145	0.447113	0.387749	0	0.383425	0.0532417	0.457719	0.245662	0.386012	0.482828	0	0.444634	0	0.650193	0.406131	0.325971	0.299627	0	0.251219	0.0946344	0.532361	0.12623	0	0.439703	0.558825	0.612356	0.425594	0	0.630734	0.378331	0.490138	0.364768	0.358827	0.441228	0.115103	0.593145	0.388246	MPP_only
Gm9493	0.511213	0.537637	0.404831	0.401521	0.574282	0.488714	0.547389	0.518432	0.812736	0.580476	0.542532	0.579852	0	0.596405	0.507839	0.425223	0.395725	0	0.361569	0.536559	0.381843	0.374021	0.815988	0.585637	0.653223	0.352336	0.621168	0.422811	0.624355	0.597725	0.539773	0.516261	0.492925	0.567657	0.545206	0.595743	0.59432	MPP_only
Gna13	0.523386	0.322524	0	0	0.301872	0.293611	0.257263	0.291875	0.244055	0.335484	0.341502	0.30444	0	0.304293	0.301375	0.491995	0.545553	0.32109	0.475392	0.365842	0.27799	0.415354	0.294251	0.326752	0.30499	0.989372	0.273715	0.135512	0.265286	0.31259	0.439118	0.595147	0.707287	0.323687	0.28375	0.381368	0.359461	MPP_only
Gramd1b	0	0.085372	0.178481	0	0.0617992	0.0710735	0.0895034	0.117895	0	0.124351	0	0.0717694	0	0.122512	0.126168	0.357746	0.306739	0	0.229622	0.18409	0.179425	0.304741	0	0.108821	0.0396713	0	0.0760699	0	0.123185	0.177652	0.117797	0.0617995	0.040266	0.0591874	0.0758379	0.113061	0.136471	MPP_only
Gstp1	0.033547	0.0859564	0	0	0.160452	0.0454007	0.125675	0.0923057	0.0901543	0.104963	0	0.141014	0.227015	0.131833	0.0896521	0.339469	0.27659	0	0.420618	0.37592	0.224504	0.22999	0.150789	0.111041	0.0773387	0	0.195544	0.242142	0.146417	0.124956	0.115111	0.135937	0.0997172	0.194323	0.0699843	0.125495	0.144844	MPP_only
H2-Q6	0.448692	0.62907	0.386784	0	0.589653	0.569052	0.532506	0.724062	0.842503	0.663622	0	0.668195	0.227015	0.587567	0.836453	0.709227	0.870741	0	0.618417	0.349479	0.75506	0.859293	0.719748	0.749348	0.723557	0.352336	0.676848	0.344614	0.671159	0.822731	0.779777	1.21941	1.23194	0.63805	0.249465	0.612723	0.810273	MPP_only
H2afj	1.02854	0.97554	1.10716	1.86176	1.15969	1.04389	1.01396	0.937149	0.768161	0.876281	0.542532	1.05738	0.677045	0.777163	0.709265	1.06092	1.01502	0	1.14586	1.35675	1.08166	0.833073	1.15145	0.844448	0.766212	0.352336	1.08856	1.49397	0.849435	0.665252	0.879143	0.805669	0.851326	1.12604	1.36538	0.811498	0.658623	MPP_only
H2afx	0.506477	2.13183	0.500043	2.18667	1.17742	1.48502	0.56498	0.469438	0.466576	2.32243	0.379251	1.17911	0.777465	0.394958	0.400259	0.395476	2.13112	0	1.37519	1.05771	0.357414	0.338305	0.299086	2.29002	0.662308	2.51805	1.22055	1.34342	0.426493	0.384518	2.12032	0.460117	2.10717	1.17821	0.81495	0.353316	0.332245	MPP_only
H2afy	3.01963	3.24742	2.40701	3.46973	3.38899	2.79264	3.3688	2.43514	3.12065	3.2739	2.84895	3.3893	3.32569	3.38477	2.3415	3.18027	3.35076	0	3.31283	2.65908	3.38215	1.96965	3.01864	3.28045	2.85068	3.83288	3.45458	3.13589	3.41134	2.40334	3.30768	2.91849	3.24184	3.48341	2.52759	3.39638	2.2728	MPP_only
Hells	0.290214	0.219131	0.178481	0.401521	0.803022	0.495796	0.359632	0.133984	0.0668688	0.212112	0.341502	0.693509	0	0.199548	0.0956297	0.116027	0.184344	0	0.405903	0.139322	0.0761052	0.0271047	0.320995	0.242928	0.580128	0.352336	0.695185	0.356094	0.206265	0.0929758	0.245652	0.361401	0.373868	0.747212	0.352792	0.202178	0.110186	MPP_only
Hist1h1b	0	1.24319	0	1.59995	0.766664	1.19515	0.0350269	0.0463087	0.157023	1.12457	0	0.810024	0	0.0588248	0.0276206	0.0517688	1.08115	0	0.893104	0.43975	0.102313	0	0	1.17595	0.25311	0.989372	0.721147	0.523738	0.0193256	0.0300352	1.07955	0.120433	1.01764	0.676868	0.146288	0.0341102	0.0349494	MPP_only
Hist1h2ap	0.0879726	0.513085	0	0.90918	0.282419	0.585916	0.02464	0.0434215	0	0.69802	0	0.42028	0	0.0244427	0.0327461	0.170467	1.50686	0	1.2092	0.590935	0.210994	0.137355	0.138072	0.722016	0.119435	0.352336	0.385231	0.116523	0.0171027	0.0349426	0.821749	0.0879963	0.779258	0.462272	0.197681	0.0632977	0.039709	MPP_only
Hjurp	0.2653	1.00563	0	0.687225	0.585272	0.613949	0.337118	0.352365	0.258559	1.26928	0	0.675744	0	0.41778	0.50744	0.386103	0.925168	0	0.651285	0.400509	0.355502	0.308174	0.488921	1.27185	0.48103	1.26252	0.669099	0.516659	0.39364	0.450279	1.31565	0.209326	0.787519	0.683382	0.477384	0.387895	0.434706	MPP_only
Hmga1	0.033547	0.0704738	0	0	0.0919864	0	0.0829201	0.0721985	0.120145	0.0561292	0	0.101038	0	0.0723362	0.0771921	0.164554	0.182035	0	0.225716	0.167158	0.149574	0.263512	0	0.0662195	0.0436273	0	0.0835168	0.165176	0.084716	0.0762953	0.0749052	0.1098	0.0946209	0.10052	0.133104	0.0713494	0.0757373	MPP_only
Hmga2	0.23558	0.318112	0	0.401521	0.251188	0.0916425	0.211438	0.160502	0.20765	0.268743	0.720752	0.22501	0.227015	0.236707	0.113301	0.416237	0.505415	0	0.358492	0.170135	0.571971	0.237443	0.294251	0.327064	0	0	0.274965	0	0.283387	0.158256	0.351317	0.128046	0.176342	0.254693	0.0933654	0.251076	0.124012	MPP_only
Hmgn2	1.14976	1.86316	0.386784	2.2919	1.60545	1.29153	1.08543	0.940122	0.624819	1.81658	0.68552	1.6046	1.44103	1.01275	0.883772	1.25815	2.10737	0	1.87914	1.54692	1.35676	1.02751	1.19905	1.98424	1.26603	2.33142	1.71833	1.82054	1.11832	0.95558	1.89913	1.06783	1.84673	1.58434	1.61934	1.00615	0.946521	MPP_only
Hmmr	0	1.0141	0	1.09071	0.136158	0.110212	0.0117397	0.00747725	0	1.23293	0	0.237811	0	0.00394777	0	0.00861599	0.704347	0	0.161703	0.111208	0	0.0186132	0	1.16184	0.0914384	1.26252	0.186802	0	0.00640372	0.0125527	1.2078	0.0259277	0.780047	0.181288	0.149964	0.0125817	0.00736447	MPP_only
Hnrnpa2b1	1.98955	2.32565	1.4963	2.43151	2.23575	2.14131	2.10329	2.05812	1.70748	2.27382	1.26665	2.15273	2.04266	1.84396	1.80884	2.07407	2.48457	0.32109	2.37113	2.12789	2.10966	1.91982	1.70005	2.26193	1.91528	2.67528	2.12558	2.09591	1.83599	1.7526	2.38515	2.04186	2.36882	2.29098	1.96774	1.99942	1.84745	MPP_only
Hnrnpa3	1.67137	1.6763	1.41201	2.18667	1.74884	1.85972	1.44409	1.42843	1.60824	1.6795	0.592418	1.72692	1.47504	1.30166	1.25563	1.59146	1.91105	0.922082	1.9529	1.80305	1.5662	1.45563	1.21807	1.6015	1.1244	1.99277	1.73451	1.46499	1.3455	1.28066	1.65245	1.37367	1.63324	1.79021	1.6387	1.38967	1.28268	MPP_only
Hnrnpab	1.37994	1.68665	0.994864	1.93574	1.87477	1.52725	1.5435	1.3873	1.32978	1.28292	0.379251	1.62783	1.86766	1.10862	0.992215	1.36132	1.54246	0.563756	1.83079	1.43333	1.26794	1.16426	1.13159	1.32627	1.29309	1.26252	1.68164	1.23165	1.11684	0.98357	1.41887	1.42438	1.65447	1.75138	1.22271	1.21279	0.993004	MPP_only
Hvcn1	0	0.0189441	0	0	0.0102532	0.2369	0.00935756	0.0162011	0	0.0581284	0	0.0421361	0.394895	0.0402725	0.0444645	0.13261	0.232347	0.563756	0.169698	0.604453	0.0338735	0.101866	0	0.0515917	0	0	0.0111815	0.289477	0.0181791	0.0176221	0.0890297	0.0204633	0.0685058	0.0247527	0.313436	0.0229329	0.0293057	MPP_only
Icam2	0.033547	0.305375	0.363558	0.401521	0.223087	0.0780734	0.175761	0.213304	0.300265	0.421636	0	0.278271	0.621911	0.250156	0.245263	0.155688	0.24378	0	0.247273	0.199805	0.102396	0.166784	0.161014	0.366499	0.113712	0	0.302429	0.356094	0.255171	0.244685	0.346806	0.206108	0.320635	0.294998	0.355882	0.208016	0.245188	MPP_only
Ier2	2.06984	0.675708	0.603117	0	0.849303	0.746348	1.10348	1.80882	2.03145	0.751327	0.949212	0.870127	1.20186	1.00175	1.97512	1.73026	1.45368	0.563756	1.28577	1.75617	1.67839	2.01377	1.02059	0.622949	1.4842	0.352336	0.741029	0.718909	0.836062	1.92976	0.697435	1.54392	1.35901	0.85181	1.16347	1.13658	1.87629	MPP_only
Ifi203	0.588415	1.06061	1.0749	1.59995	0.789654	0.674492	0.880107	0.843537	0.921988	1.18014	2.36384	0.882051	1.71033	1.26173	1.08919	0.811691	0.928038	0	0.729799	0.340917	1.20931	0.875217	0.911174	1.22856	2.28508	2.04875	0.927288	0.595201	1.20039	1.06923	1.70247	2.71481	2.52843	1.39564	0.637097	1.83232	1.798	MPP_only
Ifitm2	2.59596	2.24869	1.81932	2.3871	2.30679	1.60898	2.43787	2.52613	1.96101	1.93682	2.48173	2.11665	2.11898	2.0184	2.15881	2.46757	2.20659	0	2.28869	2.34191	2.19521	2.36168	2.26111	1.92634	2.09337	1.93346	2.08406	1.92899	2.01031	2.15267	1.90413	2.42548	2.10665	2.02651	1.93345	2.00897	2.18718	MPP_only
Ifitm3	2.43331	2.39463	2.70796	2.79221	2.25799	1.72613	2.56716	2.85755	2.20065	1.96869	3.3515	1.88514	1.03316	2.15556	2.42554	2.04554	1.77867	0.32109	1.75857	1.14947	2.06881	2.5283	2.20615	1.98145	3.2849	3.01699	1.91805	1.49246	2.27316	2.50042	2.29499	3.35042	3.17603	2.1534	1.68955	2.54077	2.85259	MPP_only
Ighm	0.197539	0.685078	2.04122	0.401521	0.54594	0.898903	0.617989	0.0566853	0.723425	0.856002	0.379251	0.699501	0.991	0.908502	0.11695	0.35806	0.67345	7.55568	0.343808	0.444929	0.75305	0.0834695	0	0.921663	0.438258	1.80313	0.732585	0.632725	0.934382	0.154898	0.832023	0.310153	0.619735	0.730088	0.430933	0.82381	0.0725753	MPP_only
Il12a	0.205909	0.562979	0.355998	0.687225	0.510489	0.124057	0.683866	0.224601	0.256936	0.495821	0.341502	0.43678	0.621911	0.68115	0.211609	0.124144	0.136331	0	0.108698	0.140326	0.246995	0.044661	0.180734	0.468401	0.295058	1.56892	0.479102	0.219308	0.641138	0.204655	0.439516	0.308943	0.376974	0.465152	0.158765	0.589716	0.192163	MPP_only
Il1r2	0.0760195	0.0126201	0	0	0.0216908	0	0.019116	0.00676933	0	0.0119085	0	0.0168612	0.227015	0.0188574	0.0167748	0.295336	0.191871	0	0.14602	0.260561	0.212644	0.0570075	0	0.0133636	0	0	0.0256059	0	0.0331083	0.00835256	0.0178178	0.0189758	0.00815229	0.0158633	0.0329451	0.0359691	0.0146533	MPP_only
Incenp	0.0897942	1.02838	0.178481	0.687225	0.458293	0.618376	0.0892167	0.0876747	0.0901543	1.15243	0	0.509071	0.227015	0.100831	0.0695783	0.0782124	0.776336	0	0.464215	0.259708	0.0286146	0.086123	0	1.14038	0.17262	1.37541	0.49413	0.381066	0.0920827	0.0899882	1.17998	0.135768	0.959964	0.479825	0.382374	0.0823535	0.0821619	MPP_only
Ing2	0.353283	0.309956	0	0	0.285185	0.314127	0.212325	0.278443	0.330696	0.348119	0.379251	0.242004	0.61275	0.157012	0.384769	0.306826	0.525293	0	0.386182	0.267111	0.304822	0.35333	0.138072	0.31809	0.268332	0	0.272663	0	0.199753	0.356082	0.312436	0.221333	0.249901	0.30136	0.256515	0.167498	0.255991	MPP_only
Inpp5d	0.109566	0.320719	0	0.401521	0.243933	0.511579	0.213171	0.234847	0.383582	0.511913	0.720752	0.352728	0.38257	0.355121	0.32437	0.604894	0.773018	0	0.594402	0.444981	0.720412	0.36096	0.382281	0.513217	0.308013	0.818528	0.348587	0.270317	0.389143	0.378595	0.5046	0.265287	0.400876	0.445916	0.441185	0.417989	0.397541	MPP_only
Ipo5	0.214148	0.527857	0.577253	0.90918	0.791479	0.412051	0.52035	0.350266	0.494112	0.428895	0.542532	0.715936	0.621911	0.318426	0.30407	0.413618	0.487484	0	0.898744	0.34625	0.37192	0.416192	0.133236	0.425483	0.347657	0.989372	0.741189	0.541805	0.363522	0.299367	0.464805	0.424416	0.554606	0.806598	0.309553	0.350283	0.28593	MPP_only
Irak1	0.567575	0.611258	0.209267	0.687225	0.60213	0.562602	0.608494	0.568333	0.855192	0.484812	0.341502	0.592987	0.227015	0.482157	0.421924	0.525088	0.558342	0	0.623685	0.44657	0.665048	0.589246	0.133236	0.501421	0.564461	0.352336	0.560617	0.494177	0.492718	0.435133	0.489471	0.529056	0.549576	0.587953	0.382829	0.553127	0.490899	MPP_only
Irak2	0	0.0132363	0	0	0.0104311	0.0326727	0.0216601	0.0206911	0	0.0195295	0	0.020846	0.61275	0.0302727	0.0579856	0.30392	0.181489	0	0.15247	0.155363	0.271644	0.198821	0.180734	0.0332331	0.0436273	0	0.0131453	0	0.04479	0.0541057	0.0371114	0.0618269	0.0684619	0.0320553	0.131882	0.0418314	0.0730432	MPP_only
Irf1	0.0709541	0.186301	0.358656	0.401521	0.238748	0.165029	0.239051	0.21718	0.413438	0.309106	0.592418	0.301889	0.227015	0.402621	0.437453	0.41419	0.483346	0.32109	0.378514	0.277371	0.481026	0.460669	0.133236	0.317652	1.04053	1.37541	0.338778	0.271244	0.391031	0.426599	0.770532	2.31788	2.30508	0.605192	0.501926	0.71924	0.99124	MPP_only
Ivns1abp	0.769566	0.709328	0.999719	1.3774	0.72692	0.841428	0.707208	0.612366	0.464821	0.557497	0.341502	0.706888	0.227015	0.552787	0.528971	0.584473	0.742193	0.758884	0.772135	0.670283	0.806203	0.518012	0.763845	0.596495	0.412327	0.989372	0.682813	0.929588	0.573429	0.537746	0.675684	0.642957	0.706306	0.789778	0.711291	0.553033	0.475296	MPP_only
Jpt1	0.945173	1.8298	0.500043	1.09071	1.21129	1.26506	1.06171	0.733131	0.629381	1.84611	1.42692	1.16927	1.38098	0.968537	0.623679	0.772374	1.60337	0.32109	1.08711	1.02927	0.669574	0.518381	0.738708	1.79491	0.793325	1.93346	1.17264	1.37968	0.919366	0.642452	1.69061	0.906069	1.57092	1.10498	1.01576	0.840756	0.608419	MPP_only
Junb	0.926694	0.310035	0.363558	0	0.515819	0.625636	0.604476	1.30869	1.31748	0.437553	0.949212	0.462077	0	0.611438	1.56435	1.20719	1.03934	0.563756	0.84586	1.52598	0.858953	1.31941	1.45931	0.380815	0.960707	0.612356	0.40974	0.360867	0.450236	1.49766	0.734443	2.38098	2.21382	0.792758	0.901303	0.943493	1.72302	MPP_only
Kctd12	0.384503	0.257928	0.359935	0.401521	0.256118	0.575252	0.281823	0.297493	0	0.330355	0.341502	0.305293	0.394895	0.398255	0.245167	0.572431	0.561029	0	0.450591	0.556664	0.329695	0.352088	0.424887	0.286233	0.243841	0.352336	0.269316	0.0959884	0.350462	0.313846	0.339433	0.361233	0.280844	0.285481	0.269783	0.373522	0.286111	MPP_only
Kif11	0	0.975036	0	1.09071	0.312491	0.660869	0.02272	0.0143389	0.0668688	1.1267	0	0.401261	0	0.0329371	0.0221615	0.0324707	0.875247	0	0.436982	0.244494	0.0335706	0.00675896	0	1.13568	0.0886095	1.93346	0.367202	0.255726	0.0294712	0.0103703	1.17462	0.0755628	0.99248	0.393887	0.171318	0.0220632	0.0170755	MPP_only
Kif15	0	0.908078	0	0.90918	0.448999	0.826643	0.0177557	0.02219	0.110198	1.00022	0	0.54207	0.394895	0.0202916	0.0100787	0.0352102	0.792263	0	0.565708	0.198439	0.0405017	0.0113375	0	0.972986	0.0609687	1.26252	0.488607	0.193489	0.0251785	0.0134323	0.980241	0.100497	0.863921	0.468951	0.147312	0.0354312	0.00756375	MPP_only
Kif18a	0	0.380395	0	0.401521	0.0985322	0.0611382	0.0337656	0.0351605	0	0.385985	0	0.135501	0	0.0357351	0.0349581	0.0418618	0.19904	0	0.127938	0.0642733	0.0826363	0.0463068	0	0.416081	0.045743	0.612356	0.1036	0.193489	0.0344201	0.0605924	0.474445	0.0231151	0.285099	0.113084	0.077426	0.0230664	0.0545609	MPP_only
Kif20a	0	0.506347	0	0.90918	0.12665	0.168515	0.00651001	0.0136517	0.0668688	0.627218	0	0.133171	0	0	0.00675894	0.00386411	0.283689	0	0.101582	0.0794951	0	0.0115741	0	0.656578	0.0740969	0.352336	0.168491	0.0769661	0.0024565	0.0133928	0.585481	0.022341	0.353059	0.146825	0.084878	0.00279196	0.0154711	MPP_only
Kif20b	0	1.11998	0	0.687225	0.399373	0.467869	0.105304	0.0717493	0.110198	1.05411	0	0.467831	0	0.0830779	0.0511848	0.0579215	0.572279	0	0.308289	0.244857	0.0232394	0.0522715	0	1.09	0.0916003	1.65324	0.378999	0.116523	0.086552	0.0718342	1.06761	0.116144	0.80928	0.435098	0.329256	0.0933264	0.0690929	MPP_only
Kif22	0.068451	0.782093	0	0.687225	0.236986	0.212635	0.013778	0.0274414	0	0.94768	0	0.279566	0	0.035816	0.0213263	0.0314054	0.627574	0	0.238637	0.20744	0	0.0151242	0	0.96159	0.0304697	0.818528	0.294508	0.195691	0.0298947	0.010024	0.944934	0.0629032	0.739782	0.255031	0.139449	0.0227295	0.0146043	MPP_only
Kif23	0.0586226	0.864881	0	0	0.215069	0.559644	0.0643152	0.0312696	0.445658	1.08532	0	0.356081	0	0.205469	0.208376	0.228496	0.710489	0	0.359348	0.206247	0.205371	0.183359	0	1.03883	0.33403	0.818528	0.308072	0.172954	0.19038	0.184497	1.08593	0.102258	0.679528	0.30781	0.290669	0.197294	0.184772	MPP_only
Kif2c	0	0.456812	0	0	0.0585557	0	0	0.00609018	0	0.502443	0	0.113844	0	0.00350327	0.00649693	0.0049464	0.217617	0	0.0551604	0.0605922	0	0.00553828	0	0.561487	0	1.26252	0.0953034	0.193489	0.00331931	0.00120821	0.578949	0.0148639	0.303367	0.0866673	0.0653006	0.00373467	0	MPP_only
Kif4	0	0.512754	0	0.401521	0.173031	0.445467	0.00445347	0.00608515	0.110198	0.5854	0	0.16609	0	0.0031614	0.00220196	0.0065646	0.411072	0	0.165026	0.138522	0	0.0143683	0	0.542959	0	1.13524	0.177783	0.255726	0.000665053	0.00627429	0.534628	0.0262614	0.466499	0.166045	0.0758044	0.00762094	0.0108287	MPP_only
Kifc1	0	0.253487	0	0	0.0675649	0.0532417	0.00951099	0	0.0668688	0.323596	0	0.0935885	0	0.00199785	0.00266736	0.00381207	0.142673	0	0.0716929	0.0196305	0	0	0	0.324264	0	0	0.0759268	0.195691	0.00443662	0	0.367003	0.0195162	0.232384	0.0824703	0.0605365	0.0164415	0	MPP_only
Klhl24	0.500942	0.427089	0	0	0.224184	0.427969	0.405553	0.649305	0.97092	0.760956	0.341502	0.434924	0.394895	0.686639	0.959736	0.845757	0.8741	0	0.613677	0.409742	1.07502	0.866898	1.14027	0.764928	0.526537	0.989372	0.435866	0.289477	0.725183	0.946376	0.776073	0.476439	0.441558	0.451393	0.436504	0.745823	0.915902	MPP_only
Klhl6	0.300828	0.481201	0.601838	0.90918	0.293322	0.457104	0.334986	0.373934	0.455646	0.630269	1.19753	0.457905	0.227015	0.517169	0.534605	0.322016	0.455363	0	0.299284	0.419459	0.251294	0.335369	0.428468	0.624161	0.663566	0.352336	0.437305	0.645521	0.485191	0.600599	0.632717	0.280637	0.448213	0.446019	0.469059	0.514156	0.453205	MPP_only
Knl1	0	1.03476	0	0	0.316632	0.603777	0.0239976	0.0158713	0	1.05035	0	0.397463	0	0.0114294	0.00841488	0.0338204	0.827075	0	0.368122	0.265604	0	0.0118191	0	1.11097	0.0522366	1.13524	0.364496	0.381066	0.0197745	0.0169167	1.0944	0.0746479	0.946047	0.383582	0.275073	0.0144397	0.0256213	MPP_only
Knstrn	0.033547	0.774706	0	0.401521	0.181512	0.099539	0.0289603	0.0587681	0	1.06471	0	0.260448	0.394895	0.0554215	0.0505512	0.0371049	0.741497	0	0.178814	0.280771	0.0193091	0.0477541	0	0.952666	0.159492	1.26252	0.25027	0.376629	0.0514117	0.0505303	0.961212	0.0757635	0.714602	0.261886	0.232263	0.0607655	0.0436272	MPP_only
Lamtor3	0.631461	0.542018	0.137962	0.401521	0.466738	0.436715	0.43281	0.444369	0	0.525379	0.341502	0.456817	0	0.395059	0.428652	0.267784	0.366447	0	0.312496	0.269081	0.258067	0.304103	0.474985	0.495472	0.228596	0	0.419672	0.358527	0.428244	0.390291	0.449939	0.39196	0.482394	0.409769	0.513217	0.368037	0.433995	MPP_only
Ldha	2.14607	1.80263	1.49432	2.18667	2.27223	2.02328	2.00738	1.93752	1.40501	1.1822	1.39856	1.9476	1.9131	1.38193	1.39298	1.5757	1.31009	0	1.95613	1.97166	1.37046	1.60009	1.70647	1.18961	1.29086	1.13524	1.91832	1.98973	1.40972	1.35544	1.19898	1.77444	1.55216	1.93026	1.91142	1.35261	1.38975	MPP_only
Lgals9	0.42495	0.714117	0.489544	0.90918	0.549969	0.565726	0.383403	0.327208	0.241694	0.807363	1.27794	0.680166	0.227015	0.552062	0.41279	0.726768	1.11421	0	1.02496	0.754783	0.911517	0.477919	0.463976	0.87736	0.817147	0.818528	0.760292	0.42507	0.496477	0.432484	0.96512	0.878796	1.12189	0.804875	0.669937	0.617084	0.496326	MPP_only
Lims1	0.144471	0.526628	0.466128	0.401521	0.424943	0.424453	0.464118	0.34915	0.360297	0.665419	0.379251	0.498737	0	0.639636	0.449563	0.280885	0.446026	0	0.334234	0.361857	0.413278	0.235381	0.448275	0.632196	0.572048	0.989372	0.482949	0.300688	0.552931	0.379309	0.671788	0.435569	0.576188	0.523272	0.565696	0.603469	0.453496	MPP_only
Lnpep	0.177119	0.324448	0	0	0.242768	0.358328	0.235278	0.268205	0.156954	0.389811	0.379251	0.293396	0	0.346937	0.277413	0.385863	0.451664	0	0.391061	0.314818	0.474411	0.515454	0.218979	0.375645	0.393433	0.818528	0.28943	0.153794	0.328901	0.36343	0.448967	0.399169	0.400009	0.346859	0.38768	0.418933	0.422755	MPP_only
Lockd	0.0879726	0.629337	0	0	0.165941	0.169816	0.0496419	0.0509129	0.210111	0.880871	0	0.265489	0	0.0711681	0.0894788	0.0577964	0.616619	0	0.26684	0.224294	0.0250218	0.0504248	0.150789	0.926028	0.0304697	0.612356	0.245036	0.195691	0.0603574	0.0778406	0.87666	0.0754427	0.575258	0.262198	0.221039	0.0771865	0.110065	MPP_only
Ltb	0.382522	0.34321	0.209267	0	0.249526	0.112258	0.511439	0.802751	0.937458	0.457435	1.53797	0.357118	0.38257	0.907782	1.2868	0.652434	0.318972	0	0.209769	0.212862	0.75726	1.02166	0.768959	0.468224	0.925797	1.13524	0.39365	0.195691	0.879014	1.34353	0.438555	1.41883	1.01617	0.307388	0.128761	0.8282	1.09735	MPP_only
Ly6a	0.865401	0.679765	2.28828	1.49485	0.910519	0.424223	1.23049	1.39784	0.492812	0.53252	2.52993	0.658382	0.596747	0.916529	1.14094	0.76976	0.399337	2.00643	0.515043	0.188875	0.828446	1.12981	0.615245	0.554861	2.09096	1.26252	0.730701	0.3041	1.04691	1.20149	0.624898	2.04786	1.20378	0.806576	0.235196	1.12693	1.37274	MPP_only
Lyst	0.033547	0.116511	0	0	0.135653	0.414389	0.13389	0.1368	0	0.182288	0	0.149191	0	0.195589	0.121095	0.334458	0.388457	0	0.31831	0.143317	0.298144	0.207696	0.47982	0.175203	0.17561	0	0.156205	0.270317	0.218069	0.146379	0.194168	0.150774	0.186041	0.199327	0.190268	0.17696	0.169092	MPP_only
Malt1	0.170664	0.166782	0.524746	0	0.144903	0.384116	0.132278	0.161566	0.279563	0.165287	0	0.145191	0.621911	0.153706	0.158795	0.456229	0.435355	0	0.336365	0.301262	0.498438	0.201223	0	0.148695	0.0588521	0	0.153237	0.0768278	0.129547	0.141756	0.177571	0.216691	0.294631	0.152469	0.1014	0.145667	0.125216	MPP_only
Maml3	0	0.377124	0.178481	0.401521	0.319004	0.150659	0.39888	0.18335	0.383725	0.33921	0	0.295466	0.227015	0.430595	0.239352	0.424694	0.530623	0	0.341025	0.229946	0.558585	0.22026	0.161014	0.424219	0.233066	0.818528	0.315758	0	0.43147	0.222074	0.496166	0.293017	0.456446	0.386609	0.142196	0.47958	0.242148	MPP_only
Mapk1	0.546291	0.635356	0	0.90918	0.539827	0.370892	0.515687	0.449727	0.369659	0.513211	0.379251	0.54587	0.50104	0.46229	0.462218	0.508248	0.664748	0.32109	0.638588	0.507535	0.522815	0.453323	0.428468	0.595411	0.504019	0.352336	0.537823	0.425149	0.479399	0.453599	0.689056	0.490426	0.669835	0.632081	0.341399	0.567903	0.507311	MPP_only
Marcks	0.158245	0.216511	0	0.401521	0.08043	0.572372	0.081032	0.121438	0	0.487674	0.379251	0.191257	0.227015	0.173212	0.187447	0.20029	0.343504	0	0.188871	0.156925	0.154462	0.132159	0.311803	0.371647	0	0.612356	0.202668	0.0769661	0.176684	0.178597	0.445676	0.192813	0.314411	0.238728	0.387673	0.182172	0.187506	MPP_only
Marcksl1	0.884429	0.459151	0.531373	0.401521	0.866862	0.295023	0.818562	0.755269	0.875088	0.395489	1.06477	0.821707	0.227015	0.745065	0.701949	0.877089	0.605444	0	0.913966	0.462702	1.004	0.601359	0.884841	0.425415	0.716263	0.612356	0.832662	0.45713	0.758061	0.772482	0.423956	1.21466	0.78756	0.830442	0.377679	0.727961	0.632869	MPP_only
Mctp1	0.123341	0.199316	0.255896	0	0.156155	0.464233	0.210526	0.270886	0.31366	0.240092	0	0.133426	0	0.276324	0.256192	0.240228	0.194658	0	0.172403	0.155665	0.168769	0.425556	0.133236	0.189529	0.0436273	0	0.171831	0.135512	0.242153	0.292988	0.176506	0.258248	0.22748	0.178025	0.361559	0.301181	0.387322	MPP_only
Mef2d	0.405757	0.24822	0	0	0.204867	0.332193	0.232028	0.282501	0.670459	0.179525	0.379251	0.259885	0.38257	0.255413	0.28201	0.437179	0.468585	0	0.404065	0.382208	0.415857	0.37694	0.161014	0.238815	0.271569	0	0.245877	0.231501	0.241673	0.279011	0.275187	0.221626	0.219336	0.307928	0.204265	0.292539	0.273462	MPP_only
Mettl23	0.596533	0.679788	0.281556	0	0.540945	0.435047	0.657094	0.635026	0.900873	0.635885	0.921783	0.636414	0.596747	0.607437	0.631084	0.516142	0.535755	0.32109	0.412573	0.379034	0.573766	0.491154	0.804867	0.594639	0.763714	0.989372	0.574279	0.544145	0.62664	0.55491	0.588277	0.533221	0.567759	0.553848	0.332399	0.565369	0.595151	MPP_only
Mettl27	0	0.18703	0	0	0.0615972	0.115142	0.103954	0.118101	0.364604	0.349662	0	0.0991226	0	0.277187	0.3237	0.146824	0.197411	0	0.0716668	0.0656286	0.256124	0.254332	0.138072	0.307528	0.368359	0.352336	0.095175	0.0959884	0.284326	0.292286	0.317336	0.099084	0.142518	0.103707	0.0562084	0.240125	0.277845	MPP_only
Mgat1	0.264417	0.554792	0	0.687225	0.44113	0.205782	0.469681	0.362932	0.349099	0.64115	0.921783	0.539292	0.61275	0.715847	0.355843	0.265682	0.387443	0.563756	0.288637	0.244968	0.676179	0.210513	0.474985	0.646279	0.531442	0.818528	0.55341	0.368645	0.679649	0.427476	0.65789	0.443585	0.527913	0.577614	0.390084	0.711666	0.422636	MPP_only
Mis18bp1	0	0.811573	0	0	0.224765	0.467988	0.0336502	0.0134345	0	1.07712	0	0.276448	0	0.0505043	0.0180096	0.04476	0.56879	0	0.253046	0.163883	0.0775947	0.0322721	0.138072	1.0974	0.12112	1.80313	0.294158	0	0.039577	0.0264801	1.06362	0.0566629	0.68675	0.311267	0.0867641	0.0425534	0.0284044	MPP_only
Mki67	0.0786542	2.04705	0	1.24429	0.827002	1.28021	0.0331486	0.0410763	0.20714	2.22472	0	1.08839	0.621911	0.0684694	0.0356602	0.0860349	1.75933	0	0.95509	0.56126	0.0766828	0.030437	0	2.22061	0.249388	2.95296	0.955516	0.709024	0.0422278	0.0555867	2.2088	0.213366	2.02319	0.973934	0.408824	0.0847831	0.0360814	MPP_only
Mllt3	0.294764	0.163285	0	0	0.147689	0.175117	0.16267	0.624325	0.327795	0.282413	0.379251	0.176813	0	0.16475	0.606776	0.243775	0.224031	0	0.205759	0.151691	0.155278	0.93534	0.284025	0.224286	0.346267	0.352336	0.163922	0	0.195123	0.672939	0.244851	0.295552	0.19991	0.176246	0.115947	0.211471	0.76226	MPP_only
Mns1	0.0810236	0.430164	0	0.90918	0.394596	0.586607	0.0579219	0.0413283	0.110198	0.602295	0.341502	0.42728	0	0.0761608	0.0727101	0.0461424	0.323027	0	0.331288	0.398756	0	0.0358323	0	0.558631	0.202653	0.352336	0.435737	0.721975	0.0826819	0.0398295	0.558449	0.108072	0.433465	0.405654	0.523333	0.0865101	0.0592872	MPP_only
Mphosph6	0.179461	0.270088	0.0783793	0.401521	0.280558	0.227071	0.194949	0.204945	0.0901543	0.239479	0	0.226398	0	0.181195	0.16026	0.352201	0.434421	0	0.377589	0.325342	0.318709	0.310078	0	0.278201	0.182404	0.352336	0.282332	0.422811	0.175291	0.210975	0.308369	0.230722	0.291241	0.271629	0.226267	0.19088	0.171906	MPP_only
Mphosph8	0.245016	0.485947	0.354326	0	0.512815	0.280168	0.41813	0.387331	0.096063	0.467855	0.542532	0.410175	0.227015	0.341789	0.298429	0.197528	0.239487	0	0.252679	0.110339	0.227529	0.196519	0.288861	0.424215	0.232905	0.612356	0.426034	0.165176	0.312695	0.28719	0.388607	0.299639	0.355873	0.41732	0.126739	0.270761	0.30399	MPP_only
Mpl	0.471798	0.243625	0.634447	0	0.32439	0.131898	0.308292	0.748988	0.498456	0.321159	0	0.3395	0	0.349285	0.732359	0.524788	0.293544	0	0.483643	0.0842533	0.298894	1.00009	0.615769	0.285532	0.511121	0	0.304353	0	0.353549	0.72927	0.299835	0.5381	0.321893	0.370998	0.0173579	0.346417	0.828621	MPP_only
Mpo	0	0.531601	0.577253	2.00462	0.675804	1.23184	0.376992	0.0412794	0.12391	0.68668	0.592418	0.821782	0.909997	0.549385	0.0638331	0.527118	0.787989	0	0.964589	2.20251	0.980725	0.0377738	0	0.702579	0.459731	0.612356	0.834747	3.07129	0.509258	0.0814925	0.825896	0.471062	0.791197	1.05322	3.02467	0.603777	0.0642946	MPP_only
Mrps25	0.204043	0.55497	0.177517	0.687225	0.573912	0.576563	0.388985	0.395212	0.507126	0.555604	0.341502	0.5449	0	0.346351	0.364741	0.287674	0.35992	0	0.495298	0.308088	0.237594	0.242684	0.271308	0.525458	0.473251	0.352336	0.551175	0.42507	0.366689	0.294644	0.406634	0.300248	0.411795	0.512547	0.556515	0.305467	0.294136	MPP_only
Mta3	0.363841	0.379608	0.354326	0.401521	0.333726	0.320184	0.308262	0.214014	0.425799	0.497107	0.379251	0.396376	0	0.431686	0.269941	0.543191	0.654717	0	0.561416	0.447119	0.557422	0.251878	0.492537	0.522137	0.581686	0.612356	0.436959	0.308467	0.451031	0.261473	0.535311	0.315557	0.469351	0.474257	0.298664	0.436426	0.271773	MPP_only
Mtf2	0.286035	0.863868	0.59672	0	0.731842	0.348575	0.584189	0.499714	0.818095	0.659348	0.542532	0.631555	0.227015	0.528553	0.47754	0.33979	0.448975	0.32109	0.513475	0.370981	0.5116	0.324969	0.613057	0.745428	0.456432	0.818528	0.638344	0.165176	0.498111	0.491513	0.70482	0.458691	0.676896	0.660347	0.319189	0.512416	0.473653	MPP_only
Mtx2	0.540465	0.505728	0.853404	0.401521	0.61104	0.472621	0.547082	0.448427	0.235956	0.486215	0.341502	0.607857	0.38257	0.457246	0.487693	0.420481	0.433786	0.563756	0.558111	0.380366	0.471254	0.234358	0.350571	0.511676	0.597288	0.352336	0.607107	0.69294	0.457986	0.419023	0.444274	0.46987	0.500551	0.573086	0.414489	0.430402	0.410414	MPP_only
Mxd1	0.166127	0.0525608	0	0	0.0578219	0.201187	0.045969	0.0991141	0.120145	0.0581982	0	0.071142	0.50104	0.0711664	0.139451	0.242097	0.2946	0	0.217658	0.211004	0.230512	0.22248	0.274098	0.095635	0.227384	0.352336	0.0607029	0.193351	0.0794675	0.161994	0.103223	0.360075	0.281266	0.06519	0.0659902	0.109192	0.169555	MPP_only
Mxd3	0	0.240576	0	0	0.0840919	0.20048	0.000901177	0.00247164	0.0668688	0.407067	0	0.115401	0	0.00400883	0.0036686	0.00336924	0.0940458	0	0.0815361	0.0557093	0	0	0	0.367226	0	0.612356	0.116821	0.255726	0.00492383	0	0.332867	0.0122916	0.176115	0.0945902	0.0698868	0	0	MPP_only
Myl10	0.855591	0.658213	0.565265	0.401521	0.695192	0.156398	0.789982	0.855872	0.574456	0.506878	0	0.597901	0	0.684062	0.983374	0.561657	0.418207	0	0.37674	0.105502	0.299387	0.429622	0.474239	0.727254	1.0758	1.80313	0.793007	0	0.841234	1.01063	0.483154	0.529158	0.537138	0.554801	0.102397	0.670226	0.543356	MPP_only
Myl12b	1.76196	1.56002	1.41102	1.49485	1.42067	1.98252	1.5035	1.59548	1.56888	1.81071	1.49174	1.64271	2.07596	1.72981	1.8127	1.69324	1.6729	0	1.56984	2.00773	1.5975	1.54427	1.73787	1.77702	1.73708	1.37541	1.60944	1.85794	1.75205	1.81543	1.62035	1.57568	1.50889	1.48486	2.11981	1.6186	1.67919	MPP_only
Ncapg	0.033547	0.562488	0	0	0.30712	0.351153	0.0156234	0.0123827	0.0668688	0.650865	0.341502	0.326829	0	0.0250151	0.00774467	0.0207613	0.294186	0	0.190003	0.10192	0.0665603	0.0163953	0	0.661136	0.0762127	0.818528	0.313119	0.0769661	0.0122482	0.00659887	0.675348	0.0906362	0.5314	0.271516	0.150776	0.0177444	0.0166056	MPP_only
Ncor2	0.294031	0.253909	0	0	0.23279	0.324581	0.204168	0.255672	0	0.243345	0	0.230653	0.394895	0.198613	0.241739	0.342242	0.303136	0	0.324883	0.168852	0.103174	0.500326	0.452042	0.213484	0.211462	0.352336	0.209194	0.165176	0.196877	0.269214	0.278339	0.209951	0.200164	0.251387	0.104263	0.210032	0.315666	MPP_only
Ndc80	0.033547	0.422338	0	0.401521	0.214268	0.495092	0.0274119	0.0121459	0.0668688	0.639079	0	0.295585	0	0.0272692	0.0320788	0.0346038	0.442856	0.32109	0.267716	0.120904	0.0495132	0.0372238	0	0.618949	0.0304697	0.989372	0.304801	0.193489	0.0393846	0.0246486	0.66206	0.0735327	0.601724	0.302242	0.137484	0.0321677	0.0439722	MPP_only
Neat1	1.05107	0.457567	0.137962	0.401521	0.494448	1.13023	0.679485	1.13955	0.746891	0.721924	0	0.593507	1.41972	0.804309	1.3185	1.18495	1.18169	0.922082	1.01473	1.9366	1.10176	1.43617	0.943046	0.618498	0.871919	0.612356	0.54659	0.744185	0.717541	1.32092	0.739162	1.12517	0.904701	0.620564	1.35318	0.981408	1.48735	MPP_only
Neil3	0	0.561423	0	0.687225	0.216121	0.449399	0.0106288	0.0111254	0	0.741625	0	0.332027	0	0.0166779	0.00638056	0.0311798	0.592394	0	0.358509	0.0947243	0.0193091	0.00628081	0	0.826898	0.105556	1.37541	0.34851	0.116523	0.0104605	0.00971263	0.815555	0.0561259	0.66848	0.303069	0.103562	0.0116486	0.00655345	MPP_only
Notch1	0.203093	0.382707	0.209267	0	0.242835	0.0402551	0.350488	0.177646	0.0901543	0.340978	0	0.214227	0	0.331985	0.166278	0.310582	0.576241	0	0.281311	0.186086	0.369547	0.211567	0.602831	0.340375	0.101764	0.818528	0.241688	0.272518	0.337917	0.172725	0.383757	0.257167	0.351001	0.301721	0.101928	0.375519	0.188733	MPP_only
Nrip1	0.87659	0.780341	0.931783	0.687225	0.642439	0.387049	0.710835	0.84155	0.526823	0.888946	0.341502	0.698562	0	0.753706	0.870907	0.684365	0.736114	0	0.630916	0.412199	0.54389	0.602817	0.503004	0.867602	0.64012	0.818528	0.668579	0.427191	0.791906	0.882781	0.973193	0.771977	0.812662	0.740332	0.331601	0.796581	0.962982	MPP_only
Nudcd2	0.420728	0.865923	0.780634	0	0.873358	0.699881	0.73946	0.579989	0.214084	0.691237	0.542532	0.697322	0.227015	0.44733	0.396331	0.381922	0.434381	0	0.586995	0.474054	0.531968	0.291704	0.352215	0.560418	0.533873	0.818528	0.685817	0.848096	0.409538	0.289855	0.630308	0.456955	0.568257	0.668446	0.715401	0.41439	0.328332	MPP_only
Nuf2	0	0.635382	0	0.401521	0.218842	0.501088	0.0103886	0.0042244	0.157023	0.688063	0	0.278492	0	0.00964213	0.00829038	0.0150545	0.475678	0	0.224792	0.117598	0.0211925	0	0	0.713397	0.0668427	0.818528	0.270455	0.299801	0.010951	0.00732482	0.687087	0.055259	0.564576	0.27119	0.0527496	0.0035699	0.0137334	MPP_only
Nxt1	0.369512	0.793711	0.565265	1.09071	0.872566	0.580368	0.641761	0.458707	0.472732	0.701119	0.379251	0.794702	0.227015	0.438572	0.383066	0.286287	0.51476	0	0.65159	0.357165	0.201502	0.218363	0.363288	0.774299	0.591845	1.13524	0.833427	0.885893	0.445177	0.309732	0.65488	0.461786	0.727263	0.76077	0.711925	0.437345	0.298281	MPP_only
Ogt	0.85778	0.878151	1.15017	0.401521	0.732852	0.764805	1.1129	1.06901	0.891601	0.907496	1.39856	0.887568	1.14111	1.34801	1.17053	0.88352	0.629872	0	0.524656	0.584378	1.15596	0.909087	1.41592	0.908662	1.10557	0.989372	0.833301	0.658041	1.3696	1.14795	1.00649	0.867445	0.713938	0.87821	0.650241	1.39497	1.25079	MPP_only
P2ry10	0	0.0173815	0.0783793	0	0.0169693	0.0611382	0.00860753	0.012894	0	0.0285982	0	0.0190294	0	0.0340076	0.0229509	0.348265	0.284042	0.32109	0.268708	0.336935	0.242288	0.155423	0	0.0395257	0	0	0.0129713	0	0.0179342	0.0331507	0.0439685	0.0147308	0.00697953	0.0221242	0.132306	0.0222705	0.0282015	MPP_only
Paqr5	0.213008	0.0772348	0.281556	0	0.147409	0.0532417	0.149176	0.0728483	0.141986	0.166443	0	0.252421	0	0.289914	0.183913	0.498643	0.296858	0	0.417981	0.15311	0.391518	0.238725	0.271308	0.143404	0.182296	0.352336	0.245597	0.0959884	0.31087	0.205317	0.13645	0.17562	0.117256	0.272185	0.030218	0.291946	0.191317	MPP_only
Paxip1	0.197129	0.211666	0.256861	0	0.293925	0.161975	0.119777	0.107256	0	0.216654	0	0.258634	0	0.103513	0.0985793	0.160552	0.245016	0.32109	0.429802	0.147133	0.172908	0.101502	0.318806	0.198439	0.0609687	0.612356	0.253418	0.116523	0.112643	0.109333	0.222261	0.159853	0.276459	0.290482	0.192997	0.114415	0.0989295	MPP_only
Pcbp2	1.17561	1.39812	0.287646	0.90918	1.29633	1.48174	1.14526	1.09672	1.20437	1.43023	2.0427	1.39365	0.991642	1.24178	1.1255	1.39728	1.6189	1.48335	1.57128	1.43584	1.11454	1.25981	1.50455	1.47831	1.21072	1.37541	1.36833	1.47117	1.25595	1.16376	1.54194	1.24849	1.45845	1.44609	1.38225	1.35022	1.26632	MPP_only
Pclaf	0.0786542	0.756113	0.177517	1.78187	1.25608	1.67717	0.0385504	0.0214357	0.327471	0.857728	0	1.36236	0.394895	0.0604068	0.0223439	0.103311	0.854762	0	1.44988	0.763122	0.0864307	0.016727	0	0.922722	0.322385	1.56892	1.33172	1.03202	0.0450591	0.025645	0.851338	0.342654	0.982641	1.33019	0.50019	0.0232633	0.0271969	MPP_only
Pcp4l1	0.297579	0.287877	0	0	0.260014	0.0454007	0.310948	0.428669	0.369792	0.297146	0.68552	0.273876	0.227015	0.310825	0.457183	0.244298	0.195614	0	0.196411	0.0632245	0.193592	0.21197	0.218979	0.354609	0.406794	0	0.254916	0.279266	0.36796	0.435233	0.248755	0.363112	0.269757	0.205578	0.0706539	0.268365	0.354444	MPP_only
Pik3r1	0.311413	0.691838	0.785597	0.90918	0.505942	0.251888	0.501879	0.634315	0.400243	0.688658	0	0.422445	0	0.640067	0.717073	0.680386	0.726828	0.563756	0.607158	0.43255	0.837142	0.918268	0.218979	0.655769	0.417024	0.989372	0.450199	0.331422	0.513893	0.665478	0.741935	0.666713	0.665177	0.553592	0.54357	0.650569	0.84221	MPP_only
Pim1	1.04232	1.24513	2.14681	1.3774	1.22158	0.515635	1.72513	1.35297	0.863925	0.70867	1.49174	0.649842	0.38257	0.995279	0.943909	1.00188	0.982614	0	0.787641	0.861632	0.955061	0.719751	0.70835	0.910627	1.4311	0.818528	0.736683	0.195691	1.13602	1.05444	1.47825	2.76695	2.64822	1.38144	1.02197	1.7482	1.69679	MPP_only
Pimreg	0	0.585366	0	0.401521	0.0726603	0.193346	0.00728162	0.0070565	0	0.926722	0	0.144989	0	0.0181131	0.00717256	0.0113243	0.608869	0	0.137461	0.041027	0	0	0	0.944296	0.036373	1.47684	0.153995	0.331422	0.00449315	0.00701525	0.871104	0.0184173	0.46236	0.17011	0.0965862	0.00695741	0.00298999	MPP_only
Plekha2	0.0810236	0.166431	0.0783793	0.687225	0.141753	0.262248	0.147783	0.163795	0.116573	0.276436	0.592418	0.172892	0	0.23393	0.241975	0.401456	0.500895	0	0.34866	0.191826	0.323998	0.327527	0.133236	0.234206	0.171961	0.352336	0.160664	0	0.252895	0.216824	0.266989	0.309747	0.341719	0.230405	0.154929	0.247732	0.257639	MPP_only
Plk1	0	0.647946	0	0	0.0588701	0.0384008	0.00832981	0.00314435	0	0.766957	0	0.0948418	0	0.0035194	0.00508784	0.00891026	0.272903	0	0.0443963	0.0837975	0	0	0	0.786327	0.0304697	0.352336	0.099085	0.255726	0.00529941	0.00698709	0.780834	0.0150674	0.446839	0.101816	0.122447	0.0099196	0.00504618	MPP_only
Plp2	0.306964	0.413609	0.0783793	0	0.482907	0.842653	0.302378	0.269792	0.443434	0.59478	0.341502	0.64358	0.991642	0.395384	0.332746	0.253682	0.357904	0.32109	0.410083	0.503521	0.157267	0.179038	0.586384	0.577605	0.348929	0.612356	0.585742	0.381066	0.410963	0.335044	0.499498	0.288949	0.436049	0.530472	0.500701	0.33138	0.281028	MPP_only
Pnisr	1.00981	1.17538	1.24678	1.24429	0.898596	0.848433	1.15393	1.27533	1.33862	1.2789	1.62879	1.00802	0.621911	1.38082	1.36106	1.17349	1.0724	0	0.885336	0.945168	1.32927	1.29313	1.3073	1.29331	1.24077	1.47684	1.02269	0.994217	1.42886	1.36813	1.34566	0.90718	0.91397	1.03393	0.819429	1.38858	1.40648	MPP_only
Pnrc2	0.156424	0.349068	0.177517	0.401521	0.178163	0.348819	0.266117	0.32646	0.0999129	0.497018	1.0829	0.25394	0.227015	0.34696	0.422915	0.306904	0.315436	0	0.226977	0.275403	0.211463	0.318823	0.161014	0.491319	0.553765	0.612356	0.275098	0.231501	0.346343	0.370487	0.449406	0.283331	0.35672	0.258709	0.261363	0.353096	0.333686	MPP_only
Ppp1r35	0.395359	0.526096	0.209267	1.09071	0.437804	0.471344	0.367914	0.376085	0.400243	0.593102	0.341502	0.51385	0.777465	0.437285	0.41138	0.24747	0.436697	0	0.360587	0.242598	0.308434	0.176947	0.138072	0.602022	0.414211	0.612356	0.461834	0.534721	0.429469	0.354248	0.527118	0.289575	0.434707	0.447625	0.39499	0.337552	0.370026	MPP_only
Prc1	0.033547	1.21593	0	0.687225	0.320967	0.357892	0.0260436	0.0225111	0.0668688	1.39038	0	0.401014	0	0.034633	0.0310265	0.0280139	0.737734	0	0.249739	0.217186	0.0193091	0.0124854	0	1.37439	0.226539	1.37541	0.382017	0.255726	0.0260563	0.015955	1.34059	0.072239	0.961865	0.335592	0.154732	0.0212419	0.0185453	MPP_only
Prune1	0.068451	0.0659993	0.177517	0	0.0426163	0.0384008	0.0425366	0.0614492	0.120145	0.0859263	0	0.0651647	0	0.0348579	0.0899311	0.235758	0.195711	0	0.20203	0.166162	0.140048	0.256375	0	0.0723327	0.105875	0	0.0667391	0	0.0564325	0.052579	0.0826004	0.0421156	0.0525777	0.071772	0.0834831	0.06959	0.0561187	MPP_only
Psmg1	0.849487	0.573891	0.465163	0	0.585496	0.332875	0.462634	0.47047	0.467495	0.533704	0	0.579942	0.227015	0.45145	0.396223	0.370619	0.404522	0	0.429329	0.404632	0.27821	0.19266	0.161014	0.460218	0.337205	0	0.552253	0.730713	0.435815	0.338178	0.421047	0.407452	0.432098	0.516272	0.484202	0.385957	0.329558	MPP_only
Psrc1	0	0.369518	0	0	0.0366063	0	0.0392893	0.0274236	0	0.585072	0	0.0933665	0	0.0632562	0.0473998	0.0291107	0.390892	0	0.0580403	0.0624139	0.0269448	0.0537135	0	0.580577	0	0.352336	0.053616	0	0.0430714	0.0423416	0.589752	0.0282485	0.300776	0.0583249	0.0897224	0.0433851	0.0499154	MPP_only
Ptma	3.77926	3.97519	3.02567	3.99567	4.1126	4.12774	3.76095	3.50071	3.7535	3.97671	3.67649	4.11799	4.13361	3.6192	3.46375	3.7956	4.13641	1.56576	4.27658	4.09748	3.75803	3.45125	3.63083	3.9751	3.74191	4.00082	4.10979	4.38784	3.63149	3.46698	3.92338	3.63815	3.92661	4.09709	3.90083	3.6122	3.39404	MPP_only
Ptp4a1	0.396592	0.447915	0.178481	0	0.544649	0.4744	0.467495	0.550762	0.674824	0.414772	0	0.450624	0.50104	0.312365	0.41768	0.519389	0.599889	0	0.566281	0.517681	0.506817	0.48974	0.724697	0.408188	0.167541	0.352336	0.412996	0.318738	0.326695	0.454464	0.411721	0.404399	0.413691	0.395189	0.491368	0.349788	0.41199	MPP_only
Ptp4a3	0.916499	0.941142	0.757849	0.401521	0.873609	0.47479	0.863949	0.73595	0.9189	0.967101	0.341502	1.01976	0.227015	0.977869	0.678132	0.745207	0.828185	0.563756	0.788868	0.364064	1.06647	0.602732	0.796559	0.959581	0.864345	0.818528	1.0137	0.586561	1.0591	0.820621	0.820003	0.649939	0.773328	0.912416	0.475403	0.892265	0.59755	MPP_only
Ptrh2	0.334674	0.415637	0.281556	0.401521	0.596378	0.234712	0.457187	0.296819	0.307563	0.330638	0.341502	0.489467	0	0.326693	0.268	0.193108	0.274674	0	0.314312	0.185273	0.302643	0.159161	0.150789	0.359387	0.319802	0.818528	0.453847	0.704421	0.361419	0.231586	0.313099	0.304475	0.354984	0.519868	0.447218	0.338894	0.181159	MPP_only
Rab21	0.251902	0.478169	0.751307	0.401521	0.421431	0.763856	0.41318	0.381766	0.472643	0.526155	0.921783	0.429226	0.621911	0.431696	0.450123	0.544858	0.690847	0.758884	0.552436	0.880519	0.416054	0.577531	0.44504	0.515763	0.491852	0	0.430491	0.271244	0.47633	0.444489	0.586416	0.69047	0.75546	0.495854	0.818211	0.524558	0.51491	MPP_only
Ramp1	1.83385	1.54617	1.31813	1.59995	1.60062	1.41304	1.73474	1.28999	1.87434	1.75562	2.05854	1.80987	1.75937	2.13394	1.56687	1.8859	1.78748	0	1.63116	1.57547	2.02507	1.19304	1.86306	1.7736	1.88176	1.87042	1.8241	2.1466	2.11339	1.73604	1.6812	1.51772	1.54631	1.7585	1.50898	1.99189	1.43155	MPP_only
Rbm3	2.3883	2.54489	2.30819	2.55399	2.5758	2.53057	2.33161	2.23118	2.30815	2.45389	1.78211	2.42834	2.58219	2.14353	1.99598	2.33616	2.56754	1.06235	2.66001	2.4219	2.27271	2.07411	2.33837	2.49576	2.2702	2.15211	2.51885	2.45224	2.15247	2.09842	2.31111	2.10993	2.29228	2.35956	2.23702	2.13084	1.90433	MPP_only
Rbm43	0.367989	0.436604	0.499078	0.90918	0.417865	0.373779	0.36288	0.37118	0.380865	0.467566	0	0.511962	0.227015	0.419254	0.352468	0.267874	0.329983	0	0.308686	0.158367	0.326993	0.269686	0	0.492794	0.663371	0.352336	0.4974	0.0769661	0.480629	0.337758	0.521128	0.508968	0.560429	0.498339	0.278916	0.472571	0.470409	MPP_only
Rbm5	0.624632	0.689826	0.209267	0.687225	0.555872	0.721958	0.611091	0.672028	0.166782	0.777837	0.921783	0.624921	0.227015	0.773024	0.660285	0.528494	0.578575	0	0.450209	0.403567	0.644659	0.526717	0.475571	0.791057	0.863169	0.612356	0.675576	0.408169	0.774344	0.747323	0.782723	0.631494	0.746866	0.690852	0.539926	0.835258	0.723899	MPP_only
Rbmxl1	0.872604	0.935972	0.960604	0.90918	1.10793	0.72804	0.891403	0.672733	0.396392	0.768267	0.341502	1.02877	0.61275	0.649974	0.551564	0.415022	0.522267	0	0.680981	0.479515	0.483507	0.318081	0.590724	0.798129	0.683088	1.13524	1.0603	1.00464	0.717101	0.499817	0.794588	0.906072	0.941163	1.02153	0.742028	0.625571	0.58448	MPP_only
Rbpms	0.641135	0.616832	0	0	0.460325	0.147815	0.485323	0.668985	0.573947	0.991493	0.542532	0.70453	0.227015	0.745412	0.874472	0.661487	0.694795	0	0.549655	0.367523	0.847908	0.695562	0.894479	0.962372	0.88321	0.352336	0.71948	0.249782	0.832111	0.990776	0.840528	0.518587	0.56106	0.610094	0.321929	0.665329	0.77443	MPP_only
Rcc2	0.798652	0.937474	0.813677	0.90918	1.00676	0.770996	0.93325	0.845144	0.675591	0.795137	0.720752	0.951661	0.38257	0.735369	0.772691	0.928722	0.964325	0.32109	1.04872	0.854034	0.824247	0.787269	1.06246	0.795771	0.671577	1.13524	0.976291	0.928787	0.762171	0.724185	0.899009	0.861932	0.923822	1.02647	0.766315	0.769995	0.727703	MPP_only
Reep4	0.253976	0.627313	0	0.687225	0.227885	0.118428	0.134814	0.154429	0.156954	0.631587	0.341502	0.193958	0.227015	0.136002	0.103558	0.101589	0.406329	0	0.153258	0.186737	0.0600675	0.0673559	0	0.65941	0.0832419	0.352336	0.208743	0.289477	0.122116	0.136965	0.648475	0.1256	0.496194	0.200911	0.144165	0.117522	0.105148	MPP_only
Rgs19	0.751942	0.588315	0.563593	0.687225	0.592991	0.573289	0.580869	0.448213	0.339852	0.694826	0.720752	0.656725	0.991642	0.693319	0.554053	0.494751	0.485228	0	0.498465	0.519315	0.61045	0.368707	0.957339	0.693008	0.67731	0.612356	0.647047	0.726535	0.714316	0.526987	0.658027	0.452515	0.49988	0.62553	0.718363	0.644006	0.449439	MPP_only
Rlim	0.939324	0.33792	0.387749	0.687225	0.305111	0.262195	0.298855	0.55617	0.366312	0.344238	0	0.323224	0	0.293423	0.59582	0.597174	0.606882	0	0.46511	0.464942	0.554697	0.691756	0.68807	0.354387	0.244058	0.989372	0.273963	0.195691	0.261644	0.624025	0.3372	0.462619	0.369221	0.31034	0.263205	0.357177	0.584156	MPP_only
Rnh1	1.03589	0.824336	0.399941	0.90918	0.801346	1.08545	0.727872	0.854901	0.675104	0.938543	1.0829	0.901432	1.14655	0.79015	0.813465	0.806216	0.782039	0.922082	0.797654	0.976821	0.56992	0.734617	1.07807	0.903981	0.917094	0.989372	0.814865	1.16841	0.85718	0.816056	0.788557	0.704388	0.720076	0.792124	0.837684	0.742305	0.830634	MPP_only
Rnmt	0.239574	0.512376	0.177517	0.401521	0.446265	0.222304	0.549233	0.447538	0.556874	0.419132	0.720752	0.461492	0	0.367981	0.275939	0.475509	0.450027	0	0.498421	0.364854	0.335902	0.492386	0.369012	0.404602	0.349876	0.989372	0.490698	0.455315	0.436597	0.371249	0.44642	0.442293	0.488471	0.457686	0.315908	0.435228	0.340563	MPP_only
Rnps1	0.442145	0.771631	0.819489	0.401521	0.731012	0.663696	0.588907	0.516433	0.322893	0.571352	0.933919	0.664649	0.50104	0.478724	0.425465	0.554034	0.793284	0	0.815128	0.628259	0.605278	0.445152	0.288861	0.636034	0.344253	0.612356	0.656812	0.538098	0.472532	0.441031	0.694483	0.542707	0.775853	0.715415	0.545511	0.502264	0.497702	MPP_only
Rock2	0.826292	0.700435	0.458759	1.24429	0.689734	0.318089	0.596129	0.635815	0.756964	0.721998	0.341502	0.650512	0.227015	0.626848	0.619204	0.611089	0.659115	0.563756	0.693565	0.390602	0.518617	0.84699	0.523144	0.618812	0.571392	1.13524	0.605253	0.366305	0.583084	0.649071	0.737879	0.584857	0.6628	0.686374	0.2855	0.618381	0.626531	MPP_only
Rpl10	3.50977	3.21096	3.10714	3.48499	3.32806	3.50955	3.5331	3.48636	3.53347	3.22266	3.37393	3.2725	3.70145	3.52294	3.49191	3.39757	3.16885	2.31126	3.19467	3.45128	3.32838	3.37381	3.29754	3.22076	3.348	3.25505	3.30771	3.44566	3.52788	3.47416	3.20945	3.31816	3.13559	3.28974	3.61072	3.53103	3.47461	MPP_only
Rpl29	2.86947	2.98263	2.97217	3.10217	2.94488	2.78412	2.98934	2.94053	3.06808	3.03043	3.30617	3.00969	3.01174	3.10634	3.00961	2.72788	2.69064	1.71264	2.69542	2.67269	2.65364	2.70416	2.93992	3.03303	3.0681	2.90788	3.01588	3.03969	3.0849	2.98095	2.92121	2.86744	2.86578	2.95147	2.94771	2.98531	2.93138	MPP_only
Rpl36	2.67299	2.51683	2.27646	2.66309	2.51325	2.28201	2.64971	2.7077	2.78559	2.56853	2.61787	2.57258	1.80109	2.77058	2.79776	2.9792	2.80336	1.56576	2.83662	2.74084	2.87525	3.05318	3.07369	2.6393	2.65752	2.48341	2.66242	2.66331	2.84061	2.86805	2.65675	2.70434	2.56412	2.68352	2.5681	2.87855	2.9524	MPP_only
Rpl36a	2.38905	2.35693	2.09642	2.2919	2.355	1.89604	2.40427	2.42827	2.53613	2.43832	2.48173	2.5004	1.94823	2.55245	2.60958	2.70918	2.64015	1.06235	2.66305	2.54718	2.73019	2.75721	2.70804	2.49795	2.53013	2.95296	2.56118	2.40641	2.60366	2.56999	2.53981	2.51789	2.46839	2.57895	2.49859	2.60214	2.68891	MPP_only
Rpl37	2.54267	2.53385	2.27777	2.62803	2.52442	2.50666	2.70309	2.74165	3.01927	2.62515	2.85584	2.6673	2.54762	2.8629	2.86808	3.08911	2.87657	1.89904	2.90653	2.9624	3.11241	3.15476	2.78595	2.693	2.64614	2.67528	2.74214	2.70164	2.90156	2.89228	2.7303	2.80178	2.6426	2.79233	2.78757	2.94697	3.01259	MPP_only
Rpl37a	2.72995	2.61672	2.29306	2.5917	2.63724	2.49539	2.73158	2.82372	2.62435	2.73031	2.64533	2.72762	2.82471	2.90434	2.97677	3.0797	2.95089	1.95417	2.9823	3.01803	3.1228	3.26886	2.9577	2.79542	2.81049	2.78538	2.82078	2.71702	2.95912	3.02066	2.81522	2.82128	2.70064	2.82047	2.91132	2.96348	3.09046	MPP_only
Rpl39	2.84673	2.90252	2.77425	3.12413	2.8194	2.80717	3.02727	2.93173	3.09246	3.07495	2.83661	3.01132	2.74631	3.20425	3.12074	3.44291	3.30209	2.14857	3.24329	3.34445	3.42461	3.39563	3.12514	3.13004	2.9984	3.33337	3.08471	3.13118	3.31744	3.17292	3.20428	3.13915	3.08821	3.14197	3.24459	3.34488	3.27962	MPP_only
Rpl7l1	0.62489	0.986935	0.813849	0.90918	0.887163	0.736687	0.844214	0.80602	0.964343	0.745138	0.341502	0.833749	0.746214	0.726012	0.655189	0.498388	0.626466	0	0.599035	0.421014	0.555048	0.548103	1.00165	0.764706	0.774852	0.352336	0.788244	0.794651	0.701649	0.644821	0.692366	0.661963	0.76846	0.709989	0.628413	0.61056	0.674493	MPP_only
Rpn1	0.743658	0.665785	0.572825	1.09071	0.764947	0.606261	0.566089	0.530682	0.400243	0.480403	0.341502	0.553352	0.227015	0.366738	0.317807	0.402303	0.494863	0.563756	0.75412	0.884339	0.459046	0.350173	0.464759	0.432922	0.626638	0.352336	0.611424	1.0437	0.358771	0.270806	0.53546	0.436663	0.518794	0.693586	0.909044	0.340682	0.333185	MPP_only
Rpp25l	0.392404	0.419285	0.209267	0.687225	0.444654	0.345631	0.425299	0.332911	0.301919	0.413527	0.379251	0.44139	0.394895	0.379054	0.278187	0.208241	0.301445	0.32109	0.248588	0.217262	0.0830195	0.202852	0.294251	0.405204	0.329994	0.612356	0.391505	0.476258	0.361735	0.266428	0.3472	0.246914	0.279945	0.36231	0.323865	0.312013	0.285968	MPP_only
Rps2	3.83345	3.88501	3.38805	4.10735	3.89377	3.84794	3.83851	3.73449	3.98487	3.94873	3.85967	3.97374	3.49062	3.90728	3.83603	3.58413	3.5885	2.273	3.67113	3.51972	3.66457	3.44586	3.73142	3.95377	3.91199	3.65306	3.97877	3.92053	3.92935	3.79282	3.83839	3.68899	3.78004	3.897	3.76052	3.84909	3.7016	MPP_only
Rps21	2.57727	2.4024	2.17951	2.5917	2.45292	2.49873	2.58651	2.66923	2.87438	2.54557	2.93901	2.58134	2.4666	2.73129	2.84055	2.99137	2.8126	1.84068	2.86656	2.87253	3.08902	3.18203	2.74196	2.61003	2.80973	2.33142	2.6652	2.41627	2.78874	2.85794	2.67276	2.70541	2.53222	2.68799	2.75291	2.82821	2.99919	MPP_only
Rps29	2.98693	2.79236	2.55265	2.87916	2.79125	2.94426	2.88049	2.91551	2.96637	2.86282	3.16891	2.87104	2.80854	2.98743	3.02864	3.20899	3.10477	2.19179	3.09664	3.25151	3.20433	3.26681	3.04848	2.98756	3.03988	3.03746	2.99165	2.99764	3.07868	3.09771	2.92914	2.95576	2.84147	2.95658	3.06785	3.03449	3.11534	MPP_only
Rrbp1	0.993027	0.95275	0.635443	1.3774	0.954625	0.945824	1.04621	0.961186	0.477164	0.68403	0.921783	0.76688	1.44103	0.705889	0.629588	0.766375	0.824888	0.758884	0.825962	0.887908	0.757521	0.66746	0.424887	0.712699	0.81093	1.26252	0.712101	1.08671	0.644404	0.666831	0.724896	0.801702	0.868187	0.712418	0.942799	0.689101	0.630926	MPP_only
Rrm1	0.49054	0.995237	0	1.49485	1.12235	1.03196	0.314717	0.219128	0.356101	1.02721	0	1.09512	0.61275	0.327653	0.209166	0.328204	1.04011	0	1.2692	0.626078	0.397196	0.176188	0.492537	1.03798	0.567603	0.612356	1.12559	0.622958	0.303267	0.179722	1.04619	0.444542	1.05544	1.13598	0.672646	0.278926	0.208903	MPP_only
Runx3	0.480235	0.60606	0.680327	0.687225	0.563119	0.200951	0.614276	0.389598	0.594223	0.560318	0.933919	0.601752	0.38257	0.518337	0.337996	0.899189	0.965269	0	0.892809	0.481651	0.812057	0.351502	0.430128	0.562382	0.191893	0.352336	0.58742	0.358665	0.539607	0.399595	0.675859	0.865593	0.993033	0.644133	0.426556	0.655119	0.350463	MPP_only
Sapcd2	0	0.495845	0	0	0.109914	0.0532417	0.0125689	0.00989116	0	0.43499	0	0.0915473	0	0	0.00810726	0.00611383	0.242056	0	0.0976151	0.0435262	0	0.00487514	0	0.483272	0	0.612356	0.0639853	0.195691	0.00845302	0	0.437285	0.00683949	0.277943	0.096979	0.0191026	0.00604302	0.00546641	MPP_only
Sar1a	0.350719	0.580413	0.315479	0	0.599209	0.546375	0.572501	0.614999	0.562887	0.457269	0.720752	0.487802	0.38257	0.398221	0.444075	0.542801	0.609783	0	0.572306	0.523684	0.305924	0.610328	0.138072	0.417951	0.434533	0	0.462384	0.455664	0.41909	0.456453	0.445893	0.584067	0.611587	0.488445	0.564359	0.454317	0.464317	MPP_only
Sarnp	0.543835	0.693838	0.681496	1.09071	0.726926	0.46964	0.617018	0.570955	0.545075	0.669049	0.341502	0.740559	0.61275	0.54197	0.47898	0.355335	0.525475	0	0.475328	0.491558	0.362269	0.37391	0.798791	0.745758	0.587262	0.818528	0.684906	0.889692	0.527483	0.555995	0.650672	0.608938	0.751216	0.678108	0.610767	0.571071	0.539328	MPP_only
Satb1	0.193318	0.638343	0	0.90918	0.506092	0.156829	0.536446	0.117389	0.559023	0.711724	0.933919	0.538976	0.38257	0.774796	0.177439	0.480275	0.561267	0.32109	0.316356	0.384731	0.713216	0.125162	0.180734	0.725741	0.479101	1.65324	0.556814	0.165176	0.807022	0.202132	0.8014	0.332435	0.579925	0.638674	0.305381	0.762675	0.180171	MPP_only
Sell	0.211314	0.429545	0.960604	0.687225	0.351088	0.746845	0.337961	0.103736	0.12391	0.389154	1.02773	0.357643	0.394895	0.266263	0.0997258	0.273672	0.495298	0	0.387572	0.579635	0.71274	0.0507225	0.294251	0.471316	0.456638	0.989372	0.40114	0.514	0.308052	0.11268	0.633836	0.449682	0.615155	0.521838	0.469834	0.444277	0.0707259	MPP_only
Senp2	0.349741	0.354711	0.434377	0.401521	0.327515	0.232808	0.314713	0.388285	0.215912	0.342416	0	0.300544	0.38257	0.287023	0.448485	0.459151	0.512566	0	0.405782	0.33348	0.450904	0.439133	0.452042	0.357769	0.199137	0.612356	0.310287	0.270317	0.267824	0.379704	0.381254	0.34577	0.385072	0.313461	0.206778	0.356256	0.395779	MPP_only
Serpinb1a	1.08346	1.19914	0.668339	1.24429	1.13801	0.779697	1.14833	0.645402	0.968188	1.28046	1.54154	1.15989	1.30489	1.29323	0.702586	0.870886	0.995116	0	0.890447	0.957931	1.14671	0.364833	0.599616	1.27511	0.906637	0.612356	1.19251	1.70173	1.33883	0.709795	1.19968	0.996955	1.19567	1.12557	1.37746	1.27949	0.643699	MPP_only
Sfr1	1.20354	0.934142	0.209267	1.09071	1.03144	1.07392	0.98669	1.0598	1.50882	1.03629	1.06477	1.18699	1.55698	1.0363	1.23566	1.07515	1.0851	0.32109	1.12548	0.946561	1.10471	0.949653	1.49848	0.993255	1.07189	1.56892	1.11336	1.07786	1.01225	1.22035	1.01502	0.87881	0.899093	1.04088	0.785079	0.970632	1.02721	MPP_only
Sgo1	0	0.46587	0	0.687225	0.209014	0.216685	0.0242775	0.0131197	0	0.575543	0	0.236482	0	0.0225579	0.00929458	0.0151414	0.275637	0	0.157942	0.0849138	0.0189105	0.0219363	0	0.52733	0.132237	0.612356	0.208468	0	0.00795179	0.00731454	0.582144	0.0345487	0.410567	0.186668	0.0818078	0.0193749	0.0115698	MPP_only
Sgo2a	0	0.513163	0	0	0.179513	0.198992	0.0108911	0.0158731	0	0.542902	0	0.168865	0	0.00716336	0.00761088	0.018269	0.244353	0.32109	0.135063	0.176825	0.026177	0.010226	0	0.604998	0.13111	0.612356	0.168272	0.172954	0.0110058	0.0080712	0.607916	0.0217988	0.288532	0.182532	0.154215	0.00976724	0.0159393	MPP_only
Sh2d3c	0.033547	0.218987	0	0	0.0648027	0.0384008	0.0948761	0.0821316	0.0570411	0.288517	0.379251	0.0822987	0	0.152004	0.141476	0.0399864	0.0815524	0	0.0397913	0.0849368	0.0560354	0.0316638	0	0.258603	0.156671	0.352336	0.0669845	0	0.122503	0.102517	0.300964	0.0248902	0.107636	0.0851056	0.135213	0.126787	0.111992	MPP_only
Shcbp1	0	0.592631	0	0.401521	0.28477	0.3935	0.0154414	0.00871212	0.166782	0.660435	0	0.387402	0	0.0239985	0.0133766	0.0294705	0.510584	0	0.358437	0.175992	0.0425485	0.0203079	0	0.68685	0.070141	1.26252	0.327136	0.339734	0.0156863	0.00836076	0.666379	0.0754369	0.568464	0.299681	0.157196	0.0163609	0.0260841	MPP_only
Sigmar1	0.657684	0.483148	0.178481	0.687225	0.548177	0.980942	0.471315	0.338021	0.0570411	0.27826	0.341502	0.427535	0.227015	0.334764	0.245188	0.130941	0.152771	0	0.2426	0.225968	0.218395	0.134752	0.530027	0.277568	0.249602	0.352336	0.435382	0.41743	0.306295	0.256692	0.237056	0.222967	0.211754	0.3629	0.301078	0.240227	0.214559	MPP_only
Ska2	0.108506	0.274875	0	0	0.102612	0.0384008	0.0498337	0.034622	0	0.399324	0	0.188273	0	0.0494614	0.0420223	0.0312599	0.174869	0	0.104794	0.0424375	0.0777358	0.0188317	0.133236	0.381223	0.0743521	0	0.154916	0.0769661	0.0499241	0.0407675	0.345049	0.0328602	0.217762	0.137785	0.111479	0.0493325	0.054357	MPP_only
Slc16a6	0	0.130127	0	0.401521	0.177934	0.189304	0.150262	0.0812167	0.116632	0.0820903	0	0.140881	0.227015	0.127844	0.0911467	0.224141	0.29608	0.32109	0.258475	0.333504	0.256929	0.170677	0.138072	0.10987	0.053773	0.352336	0.114828	0.165176	0.0818147	0.0792392	0.121772	0.108864	0.121797	0.149119	0.210963	0.105455	0.0954206	MPP_only
Slc9a8	0.156424	0.177185	0.0783793	0	0.149047	0	0.153598	0.221145	0.0570411	0.184526	0	0.141613	0.38257	0.17513	0.162107	0.225604	0.282177	0.32109	0.232355	0.173829	0.281828	0.332013	0.138072	0.205471	0.0851359	0.818528	0.156276	0.0769661	0.182769	0.179062	0.225654	0.164739	0.181578	0.172934	0.0655686	0.213794	0.174523	MPP_only
Smad7	0.892585	0.34725	0.178481	0	0.256802	0.23181	0.364537	0.741753	1.07436	0.537465	0	0.357307	0	0.505493	0.927912	0.665014	0.701455	0	0.457583	0.280178	0.756112	0.764354	1.12142	0.47235	0.513909	0.352336	0.327501	0.116523	0.532882	0.959377	0.389204	0.219106	0.20004	0.323569	0.10755	0.454617	0.67368	MPP_only
Smarca4	0.896088	0.810252	0.922094	0.687225	0.742823	0.750606	0.600412	0.530033	0.206727	0.822951	0.379251	0.635544	0.38257	0.497092	0.428922	0.629059	0.859297	0	0.804357	0.5686	0.480932	0.436345	0.654936	0.768994	0.687068	0	0.69687	0.541672	0.502546	0.412111	0.799759	0.632877	0.876042	0.774932	0.34824	0.583351	0.505932	MPP_only
Smc4	0.345206	1.83529	0	2.00462	1.15669	1.52709	0.557318	0.503739	0.838575	1.95505	0.542532	1.28234	1.26502	0.596243	0.538881	0.488819	1.67803	0.32109	1.11167	0.872155	0.573932	0.47986	0.649935	1.97245	0.823173	2.15211	1.25771	0.915107	0.585613	0.496346	1.94326	0.62692	1.80381	1.2637	0.869018	0.559732	0.53748	MPP_only
Smco4	0.349713	0.354513	0.280277	0.401521	0.699472	0.156894	0.564258	0.399483	0.360628	0.20549	0.341502	0.63928	0	0.300841	0.265852	0.27497	0.192752	0	0.463601	0.221171	0.229253	0.257624	0.311803	0.197822	0.425228	0.352336	0.52067	0.260106	0.315617	0.253898	0.208562	0.342647	0.250405	0.51113	0.317277	0.264978	0.26574	MPP_only
Snx2	0.274615	0.606864	0.489544	1.59995	0.566014	0.489087	0.549749	0.480398	0.413573	0.595154	1.0829	0.455576	0.621911	0.450705	0.384456	0.323272	0.384365	0	0.389976	0.48855	0.399128	0.323463	0.373513	0.509738	0.686875	0.818528	0.471803	0.7195	0.439444	0.450273	0.578242	0.904369	0.867941	0.582417	0.431909	0.517166	0.482342	MPP_only
Sp3	0.386178	0.413393	0.0783793	0.90918	0.362136	0.475426	0.323617	0.326048	0.116573	0.530946	0.921783	0.444426	0.227015	0.31869	0.250338	0.289108	0.362252	0	0.353311	0.430616	0.278022	0.271835	0.568349	0.451911	0.546022	0.818528	0.44959	0.272657	0.351966	0.307545	0.499364	0.268656	0.455756	0.442005	0.415346	0.370048	0.324612	MPP_only
Spc24	0.0709541	1.10268	0	1.09071	0.866138	0.911926	0.0608433	0.0309115	0.142313	1.19058	0	0.92217	0.394895	0.0749775	0.0436115	0.0842356	1.01037	0.32109	0.954266	0.373241	0.0193091	0.0488757	0.150789	1.19965	0.273073	0.989372	0.881875	0.866227	0.0544313	0.0268051	1.06976	0.204696	1.10935	0.82855	0.362931	0.0460169	0.0320938	MPP_only
Spc25	0	0.601136	0	0.687225	0.362438	0.506648	0.0262102	0.00407029	0.0668688	0.861481	0	0.418138	0	0.0343589	0.0289706	0.0335711	0.573592	0	0.357312	0.184655	0.0193091	0.0155256	0	0.887706	0.279081	1.37541	0.392669	0.252254	0.0301786	0.0136469	0.812797	0.0756977	0.691357	0.408097	0.159455	0.0193492	0.017864	MPP_only
Spdl1	0.033547	0.352675	0	0	0.152697	0.266307	0.0214767	0.0148097	0	0.383934	0	0.112529	0	0.0173435	0.0150947	0.0129135	0.140888	0	0.0659446	0.05616	0	0.00669893	0	0.43033	0.130167	0.989372	0.138741	0.195691	0.0209762	0.00857286	0.419675	0.0544146	0.371746	0.153753	0.0910431	0.0113554	0.00566828	MPP_only
Ssbp1	0.818232	0.895616	0.439533	0.90918	0.866251	0.627726	0.775838	0.64268	0.551539	0.873105	0.921783	0.824729	0.50104	0.707206	0.626428	0.651509	0.714137	0.32109	0.729289	0.536685	0.762687	0.467273	0.352215	0.795027	0.538761	0.612356	0.861576	0.835973	0.771251	0.637985	0.820686	0.649598	0.808645	0.828805	0.870128	0.760004	0.601233	MPP_only
Ssh2	0.29539	0.250724	0.209267	0.401521	0.183832	0.441214	0.241772	0.253246	0.440192	0.407273	0	0.243337	0.227015	0.442002	0.312899	0.612435	0.54555	0.32109	0.362941	0.434709	0.595421	0.416233	0.161014	0.395219	0.225001	0.612356	0.217017	0.0768278	0.387857	0.278582	0.517552	0.487545	0.499359	0.368778	0.26956	0.537252	0.371554	MPP_only
Ssna1	0.270616	0.893888	0.459072	0.90918	0.851747	0.831779	0.576572	0.577343	0.741257	0.985066	1.13495	0.84978	0.991642	0.567812	0.549386	0.468563	0.827631	0.32109	0.729767	0.68606	0.493703	0.42239	0.98471	0.958756	0.666294	0.818528	0.847739	0.974097	0.62254	0.572584	0.859321	0.395676	0.721143	0.823733	0.641294	0.537003	0.488505	MPP_only
Stk16	0.361434	0.775297	0.7711	1.49485	0.664194	0.530282	0.581312	0.554024	0.571257	0.741593	1.27794	0.580105	0.839766	0.541584	0.484692	0.41272	0.497597	0	0.504357	0.521497	0.43827	0.296163	0	0.761886	0.553839	0.352336	0.62599	0.622503	0.569042	0.460331	0.675643	0.542513	0.679913	0.620465	0.737141	0.557622	0.433331	MPP_only
Strn3	0.336945	0.378461	0.137962	0.401521	0.339317	0.186309	0.345652	0.356983	0.283355	0.330364	0.341502	0.301639	0.394895	0.353761	0.268171	0.336335	0.352862	0	0.3297	0.279237	0.331751	0.513735	0.53307	0.296189	0.190573	0.352336	0.293274	0	0.292423	0.354275	0.402542	0.343333	0.395054	0.317624	0.356921	0.334612	0.405188	MPP_only
Suz12	0.404612	0.715236	0.434377	0.687225	0.744147	0.581769	0.493795	0.447924	0.461658	0.637442	0	0.680262	0	0.343792	0.297977	0.435998	0.694315	0	0.744387	0.589423	0.402143	0.508699	0.318806	0.673165	0.393302	0.818528	0.624189	0.260106	0.379421	0.304236	0.747256	0.530548	0.791324	0.766887	0.560058	0.423107	0.379592	MPP_only
Tagln2	2.2412	2.16324	1.98219	2.82204	2.33697	2.30735	2.17928	2.11334	2.05524	1.92341	2.05344	2.14767	2.69205	1.90221	1.84294	2.16881	2.07946	0.563756	2.30476	2.31621	1.975	2.0294	1.83948	1.91443	1.90935	1.47684	2.14077	2.35544	1.92078	1.89815	1.93034	2.09023	2.04548	2.10832	2.05736	1.91121	1.8335	MPP_only
Tbxa2r	0	0.217695	0	0	0.196698	0.0384008	0.242469	0.0758254	0.096063	0.277706	0	0.229791	0	0.353814	0.145928	0.0403062	0.0497474	0	0.0223115	0.0126387	0.114905	0.0296749	0.150789	0.280733	0.0675066	0	0.273344	0.116523	0.311968	0.120865	0.227296	0.0387028	0.0834074	0.183399	0.0226921	0.215577	0.103019	MPP_only
Terf1	0.184727	0.538273	0.387749	0	0.210342	0.0768722	0.170022	0.200832	0.110198	0.709705	0.379251	0.244457	0.394895	0.232541	0.216274	0.162958	0.396811	0	0.206833	0.141267	0.198662	0.201175	0.47982	0.66857	0.268945	0.612356	0.254378	0.272657	0.207243	0.222778	0.662977	0.150308	0.431218	0.283059	0.147428	0.237128	0.178131	MPP_only
Thrap3	1.09705	1.14684	0.921078	1.24429	1.09725	0.896985	1.00725	1.02677	0.55467	1.04235	0.921783	1.09313	0.991642	0.872159	0.88149	0.971762	1.08233	0.32109	1.1399	0.758035	0.964922	1.04147	0.842911	0.999572	0.905738	1.56892	1.02324	0.739026	0.819683	0.821379	1.04947	0.971048	1.11079	1.06977	0.865173	0.894476	0.918952	MPP_only
Timm10	0.959493	0.676797	0.489544	0.687225	0.79047	0.502677	0.722451	0.590569	0.496864	0.261479	1.06477	0.507687	0.227015	0.425873	0.35629	0.233947	0.213483	0	0.302355	0.174769	0.283693	0.178763	0	0.299124	0.528785	0.352336	0.473023	0.475157	0.404888	0.333903	0.346517	0.540762	0.550395	0.507892	0.370206	0.348081	0.315542	MPP_only
Timm10b	0.500543	0.52192	0.625121	0.687225	0.482784	0.492899	0.495811	0.484175	0.271125	0.471508	0.341502	0.484246	0.61275	0.366771	0.362422	0.250926	0.320978	0	0.273163	0.388043	0.142206	0.215063	0.422097	0.473053	0.219139	0.818528	0.485162	0.827083	0.40652	0.416081	0.439294	0.469808	0.525244	0.463983	0.666686	0.373077	0.367154	MPP_only
Timm9	0.56878	0.891528	0.578422	0.687225	0.95389	0.46096	0.863443	0.757578	0.435676	0.492293	0.341502	0.622826	0.50104	0.508805	0.477198	0.326633	0.356974	0.32109	0.434437	0.300771	0.581594	0.41994	0.654936	0.472862	0.442462	0.612356	0.656705	0.605818	0.503733	0.461235	0.517864	0.58716	0.654291	0.604943	0.605078	0.496763	0.418695	MPP_only
Tlk1	0.0709541	0.342962	0.435617	0.90918	0.307852	0.306796	0.261143	0.322982	0.164321	0.231144	0	0.226905	0.50104	0.274112	0.2486	0.244879	0.266645	0.32109	0.282532	0.333472	0.582757	0.339867	0.288861	0.307562	0.369709	0.352336	0.259164	0.40825	0.207915	0.251522	0.317363	0.194482	0.206882	0.303443	0.198739	0.243832	0.290773	MPP_only
Tm6sf1	0.371701	0.484695	0	0.687225	0.449219	0.895446	0.430551	0.195411	0.597809	0.600395	0.720752	0.553168	1.05314	0.543939	0.237542	0.701798	0.819026	0	0.663716	1.01122	0.86663	0.304521	0.341748	0.598141	0.35753	0.989372	0.575017	0.820944	0.610234	0.291561	0.695684	0.383618	0.506945	0.653636	0.825085	0.674	0.212994	MPP_only
Tmem173	0.185525	0.471034	0.577253	0	0.352978	0.251697	0.382054	0.207801	0.716698	0.447447	1.13495	0.347123	0.394895	0.504573	0.214519	0.171077	0.219645	0.32109	0.159247	0.261803	0.255688	0.103165	0.150789	0.462766	0.380539	0.612356	0.365142	0.469819	0.483433	0.245005	0.485839	0.593697	0.683783	0.433552	0.342886	0.489499	0.280682	MPP_only
Tmem176a	1.14756	1.00625	1.57781	0.687225	0.989848	0.661196	1.0928	1.22448	1.04953	1.13057	1.0829	1.03699	1.41972	1.19554	1.105	0.995781	0.939962	1.77871	0.921337	0.594013	0.955853	1.05033	1.21399	0.991885	1.35579	1.13524	1.03189	0.553776	1.09158	1.20164	1.04638	1.07341	0.954216	0.94556	0.507438	1.09541	1.2625	MPP_only
Tob2	0.64565	0.199201	0.177517	0.401521	0.174188	0.254584	0.221515	0.236745	0	0.321309	0	0.218436	0.227015	0.265949	0.284042	0.475746	0.580174	0	0.429606	0.352914	0.499809	0.432801	0.269114	0.288391	0.32562	0	0.234959	0.329002	0.238036	0.315802	0.321848	0.174161	0.167022	0.236299	0.339806	0.288165	0.24877	MPP_only
Top1	0.718386	1.29571	1.49397	0.687225	1.12829	0.841974	1.21649	1.24648	0.505687	1.16439	0.921783	0.972252	0.50104	1.03673	1.07847	0.895406	1.01525	0.563756	0.773131	0.732481	1.15223	0.94502	0.939052	1.17351	0.828114	0.818528	0.934316	0.790749	1.02071	1.12453	1.18262	1.43697	1.34341	0.998299	1.18863	1.11026	1.15655	MPP_only
Top2a	0.310598	2.32153	0.387749	2.12959	1.52279	1.77725	0.289397	0.135262	0.0570411	2.44024	0	1.54951	0.596747	0.255342	0.180153	0.252037	2.16656	0	1.57116	0.960835	0.268603	0.10137	0.133236	2.49782	0.594916	2.78538	1.53777	0.895097	0.229838	0.129548	2.46979	0.443274	2.30981	1.54778	0.687152	0.202767	0.166904	MPP_only
Tox4	0.370354	0.437016	0.255896	0.687225	0.377727	0.727553	0.377416	0.434254	0.381751	0.356607	0.379251	0.345744	0.394895	0.348996	0.455686	0.455661	0.544534	0	0.436279	0.314766	0.296279	0.490181	0.592492	0.424442	0.295538	0	0.38185	0.51466	0.357317	0.42018	0.396694	0.512272	0.471466	0.3928	0.315034	0.440112	0.4367	MPP_only
Tpx2	0	1.26676	0	0.90918	0.395286	0.402375	0.0362944	0.0296576	0.110198	1.36854	0	0.437011	0	0.0200985	0.0192722	0.0354755	0.982033	0	0.356503	0.224645	0.068508	0.021371	0.138072	1.35759	0.171484	1.47684	0.409229	0.332692	0.0332282	0.0228382	1.39966	0.102936	1.18255	0.425822	0.230376	0.0261268	0.0446909	MPP_only
Tra2b	1.12733	1.15486	0.978543	1.49485	1.22357	1.14244	1.06232	1.15819	0.809778	0.919553	1.26665	1.07832	0.895935	0.817939	1.08876	1.01154	1.10854	0	1.25865	0.948075	0.998648	0.952997	0.718639	0.964112	1.0549	1.13524	1.07519	1.00002	0.803599	1.07126	1.04186	1.21364	1.27325	1.18189	1.11461	0.961466	1.14454	MPP_only
Traf3ip3	0.366347	0.336397	0.988077	0.401521	0.323449	0.271464	0.361232	0.372954	0.489485	0.566101	0.720752	0.451677	0	0.567708	0.530965	0.343348	0.363073	0.32109	0.263895	0.187698	0.48668	0.383392	0.133236	0.513209	0.531339	0.352336	0.444823	0.270317	0.570594	0.58753	0.467458	0.276192	0.294911	0.403015	0.42146	0.513709	0.597131	MPP_only
Trim59	0	0.61616	0.0783793	0.687225	0.188666	0.249596	0.131792	0.0995562	0.0668688	0.696709	0.379251	0.252896	0	0.172033	0.126294	0.0900501	0.201694	0	0.146383	0.110705	0.0271904	0.0631547	0	0.618272	0.315276	1.13524	0.231876	0.0959884	0.136982	0.102269	0.655458	0.0966107	0.320426	0.207566	0.11934	0.156219	0.0893215	MPP_only
Tsen15	0.522928	0.544112	0.74064	0	0.581762	0.337382	0.388945	0.390212	0.325154	0.462378	0.341502	0.585923	0	0.370554	0.382683	0.235703	0.343223	0	0.379137	0.171833	0.235017	0.25566	0.549746	0.378234	0.452322	0.352336	0.503364	0.252254	0.296597	0.334585	0.373028	0.32343	0.392325	0.488186	0.16276	0.266554	0.338105	MPP_only
Ttk	0.033547	0.374346	0	0.401521	0.145016	0	0.00976528	0.00990954	0	0.482393	0	0.165385	0	0.0148936	0.00660748	0.0171298	0.289568	0	0.164998	0.158572	0	0.00506141	0	0.440129	0.106514	0	0.148566	0.193489	0.00962214	0.00879276	0.478385	0.0400163	0.311143	0.147903	0.036967	0.00296214	0.00610514	MPP_only
Tuba1b	1.57543	2.61868	0.925988	2.79221	2.49698	2.29678	1.4243	1.16576	1.53751	2.75338	0.887398	2.54951	1.75937	1.14368	1.10753	0.982884	2.26845	0	2.26374	1.19339	0.997161	0.778089	1.57753	2.75669	1.47003	3.09645	2.61826	2.13682	1.17625	1.02912	2.57598	1.3344	2.65522	2.49957	1.21565	1.03215	0.929595	MPP_only
Tuba1c	0.393799	0.900784	0	0.401521	0.201283	0.438231	0.112921	0.165154	0.0668688	0.961639	0.379251	0.268851	0.621911	0.12465	0.133131	0.132748	0.467796	0	0.181665	0.21445	0.117011	0.132908	0	0.936959	0.0668427	0.612356	0.234834	0.42499	0.112057	0.139734	0.888218	0.0988168	0.671548	0.195062	0.247691	0.100507	0.110239	MPP_only
Tubb5	1.86261	2.9964	0.994864	3.12413	2.74985	2.54926	1.68815	1.51477	1.8467	3.19682	1.95189	2.83974	2.35189	1.64844	1.5494	1.75002	3.22507	0.563756	3.02283	2.18661	1.70138	1.59827	1.88248	3.26494	2.06349	3.27121	2.91603	2.27165	1.69971	1.58473	3.17079	1.50511	3.03308	2.80365	1.62414	1.5859	1.47384	MPP_only
Ubald2	0.368537	0.904422	0.746405	0	0.421097	0.71072	0.49702	0.511133	0.720453	1.28667	0.921783	0.605415	0	0.685537	0.709494	0.713392	1.01702	0.32109	0.604835	0.766288	0.849565	0.773859	0.750405	1.23245	0.662837	1.13524	0.658008	0.468205	0.680877	0.683364	1.21652	0.796326	1.22072	0.611682	0.665408	0.702848	0.671674	MPP_only
Ubb	2.94953	3.39945	2.72705	3.37292	2.98068	3.07057	2.95248	3.0818	3.24196	3.51093	3.40616	3.03367	3.08296	3.02614	3.13104	3.3123	3.6887	2.54455	3.19182	3.41093	3.16056	3.33807	3.20598	3.54864	3.10852	3.52478	3.09223	2.97123	3.07998	3.21855	3.45985	3.03512	3.38891	3.02774	2.8746	3.02728	3.16065	MPP_only
Ube2c	0	1.97301	0	0	0.193487	0.927251	0.0196839	0.0195862	0.0668688	2.17578	0	0.301171	0	0.0471812	0.0407925	0.0278772	1.71642	0	0.194365	0.462268	0.0286146	0.0240713	0	2.13167	0	2.24577	0.263068	0.639575	0.0309155	0.0318989	2.04244	0.0387729	1.59208	0.236717	0.383408	0.0443159	0.0482077	MPP_only
Ube2t	0.0786542	0.420638	0.209267	0	0.375795	0.314571	0.131732	0.0868222	0.214025	0.476453	0	0.382646	0	0.124802	0.100073	0.0819938	0.300278	0	0.279284	0.178224	0	0.0639404	0	0.49413	0.273727	0.612356	0.379191	0.366305	0.115244	0.103032	0.519485	0.114083	0.330328	0.374063	0.22801	0.0966165	0.0703064	MPP_only
Uhrf2	0.410111	0.70438	0.177517	0.401521	0.582882	0.356645	0.561144	0.524008	0.615023	0.87174	0.341502	0.685486	0.777465	0.669504	0.575377	0.523871	0.648904	0	0.586562	0.300008	0.654207	0.62723	0.269114	0.834342	0.776369	0.818528	0.695925	0.437833	0.665991	0.618341	0.815033	0.489772	0.642241	0.688433	0.469029	0.607436	0.606602	MPP_only
Utp11	0.61687	0.789794	0.537138	0.90918	0.823507	0.710254	0.778071	0.654568	1.14314	0.663496	1.13495	0.765049	1.14111	0.620054	0.633882	0.490524	0.570083	0	0.587453	0.507008	0.495267	0.44914	1.07211	0.658352	0.704299	0.989372	0.758084	0.692146	0.635607	0.618191	0.612102	0.606407	0.66569	0.723173	0.678143	0.592153	0.592699	MPP_only
Wee1	0.169551	0.476556	0.281556	0.687225	0.468459	0.38387	0.501549	0.359867	0.173673	0.523527	0.379251	0.478619	0	0.361293	0.294421	0.17105	0.309196	0	0.347854	0.35682	0.168885	0.114058	0.586347	0.545882	0.296321	0.989372	0.4415	0.349485	0.301076	0.259488	0.554536	0.246568	0.390078	0.421733	0.309841	0.311552	0.247118	MPP_only
Xpc	0.344382	0.557389	0	0.687225	0.520236	0.276569	0.571418	0.34426	0.630658	0.635919	0.592418	0.575971	0.227015	0.668955	0.4381	0.483871	0.575045	0	0.382648	0.401609	0.537463	0.33525	0.299086	0.639747	0.278046	0.352336	0.568184	0.435493	0.629084	0.410688	0.586189	0.301098	0.371484	0.632665	0.491733	0.631369	0.466171	MPP_only
Zdhhc20	0.379978	0.392408	0.387749	0	0.313052	0.177079	0.429038	0.358397	0.338554	0.430713	0	0.332453	0.839766	0.405058	0.292066	0.477628	0.488683	0	0.419022	0.354276	0.394713	0.530889	0.373513	0.369223	0.305118	0.989372	0.348733	0.531302	0.414068	0.360451	0.436506	0.361282	0.381554	0.403745	0.366704	0.491007	0.390319	MPP_only
Zeb2	0.312055	0.335014	0.178481	0.401521	0.359278	0.342511	0.277325	0.306402	0.296891	0.542452	0.933919	0.515689	0	0.509616	0.430224	0.329066	0.372861	0	0.364803	0.479846	0.538215	0.501719	0.138072	0.527677	0.471084	0.612356	0.513596	0.99385	0.474812	0.455013	0.579451	0.882409	0.76178	0.610686	0.512744	0.569592	0.586268	MPP_only
Zer1	0.0760195	0.133064	0	0	0.106565	0.0402551	0.120898	0.136754	0.125758	0.234825	0.592418	0.182548	0	0.202975	0.17019	0.257572	0.338789	0	0.251342	0.216718	0.399696	0.345354	0.133236	0.231666	0	0.352336	0.158556	0	0.218626	0.197432	0.261316	0.0882357	0.133819	0.168338	0.177652	0.225109	0.232002	MPP_only
Zfp106	0.452678	0.567712	1.03454	0.687225	0.620436	0.319089	0.556805	0.559352	0.303645	0.432698	0.379251	0.451927	0.621911	0.342205	0.326823	0.470821	0.432173	0	0.455748	0.439551	0.292815	0.563486	0.532949	0.427771	0.247787	0.989372	0.424939	0.212479	0.424711	0.377954	0.499834	0.532356	0.544002	0.500736	0.443462	0.415821	0.395745	MPP_only
Zfp207	0.940902	0.837934	0.563593	1.24429	0.759761	0.783756	0.729326	0.6555	0.589193	0.778796	0.720752	0.728835	0.777465	0.720411	0.66696	0.441627	0.558029	0.32109	0.631925	0.491263	0.610667	0.399335	0.938117	0.790137	0.676611	0.989372	0.784448	0.857117	0.74735	0.626092	0.841925	0.637993	0.773658	0.793867	0.747547	0.684675	0.630212	MPP_only
Zfp36	0.747151	0.199428	0.178481	0	0.266823	0.505189	0.363043	0.855878	1.22639	0.408238	0	0.39969	0.777465	0.579127	1.32632	1.1137	0.834492	0.758884	0.681393	0.951886	1.03161	1.15064	1.13641	0.345703	1.07442	0	0.328413	0.332692	0.479181	1.27833	0.57118	1.32903	1.06749	0.553006	0.535513	0.853833	1.35852	MPP_only
Zfp36l2	2.35272	2.10568	1.65675	1.24429	1.90636	1.64144	2.26376	2.45763	2.17197	2.12819	1.68198	1.96058	2.07511	2.21102	2.32557	2.32227	2.54636	1.64189	2.29353	2.02097	2.21677	2.43586	1.92422	2.04588	1.94455	2.20004	1.82273	1.44955	2.04717	2.22934	2.16504	1.57493	1.98358	1.86178	0.95253	2.10791	2.17379	MPP_only
Zfp516	0.193065	0.0496093	0	0	0.0429645	0.099539	0.069134	0.0938858	0	0.0953574	0	0.0520305	0	0.059722	0.101294	0.202347	0.19419	0	0.0885768	0.158238	0.0772562	0.234302	0	0.0757966	0.137327	0.352336	0.0364195	0.231501	0.0692078	0.128611	0.0832243	0.158661	0.131198	0.0641425	0.22799	0.0920062	0.120244	MPP_only
Zfp638	0.474868	0.768743	0.668026	0	0.611465	0.430612	0.642105	0.596782	0.382469	0.698665	0.341502	0.585982	0.99532	0.559545	0.52207	0.423269	0.471669	0	0.410776	0.317641	0.326715	0.562438	0.602831	0.694365	0.571031	0.989372	0.574972	0.289339	0.621539	0.510752	0.648525	0.510181	0.60943	0.597419	0.446655	0.559607	0.602824	MPP_only
mt-Nd4l	0.589402	0.68466	0.609753	0.401521	0.723267	1.00104	0.657656	0.696708	0.760027	0.547432	0.341502	0.513277	0	0.425842	0.543747	0.677363	0.651592	0.32109	0.754019	0.845389	0.469538	0.677113	0.550501	0.489329	0.534046	0.818528	0.516822	0.378969	0.447157	0.481127	0.488779	0.473115	0.435722	0.603021	0.644593	0.481936	0.583099	MPP_only
1700017B05Rik	0.425001	0.376155	0	0.401521	0.321809	0.211633	0.320721	0.34392	0.365895	0.258212	0.592418	0.305838	0	0.283302	0.303593	0.696658	0.671024	0.32109	0.524532	0.402372	0.624433	0.593765	0.138072	0.285568	0.248633	0	0.309611	0.289339	0.252876	0.31397	0.269621	0.128652	0.161329	0.277521	0.258166	0.241035	0.166491	overlap
Abhd17b	0.468933	0.496704	0.209267	0.687225	0.47557	0.0786559	0.656605	0.341445	0.450782	0.322842	0.379251	0.366889	0.227015	0.427909	0.241214	0.859315	0.800479	0	0.675898	0.569414	0.881773	0.541227	0.318806	0.35308	0.347066	0.612356	0.360174	0.0768278	0.414997	0.2594	0.50865	0.973496	0.901225	0.48159	0.39879	0.582622	0.353584	overlap
Ablim1	0.0709541	0.170273	0	0.401521	0.140356	0	0.165419	0.166023	0.210111	0.227006	0.379251	0.160142	0	0.206805	0.163056	0.347471	0.300829	0	0.221968	0.113267	0.401223	0.45616	0.161014	0.162003	0.117038	0.818528	0.169553	0.193489	0.257948	0.187119	0.265809	0.181776	0.17802	0.210718	0.0899418	0.280617	0.199649	overlap
Aff4	0.101998	0.224061	0	0	0.199546	0.124315	0.243781	0.361194	0.240483	0.268642	0.379251	0.181103	0.38257	0.268729	0.381381	0.446989	0.467144	0.32109	0.32002	0.329011	0.419123	0.510149	0.422097	0.310433	0.248417	0.818528	0.172443	0.172816	0.299396	0.408789	0.309701	0.33934	0.26763	0.213006	0.267891	0.30697	0.370728	overlap
Ago2	0.342217	0.449122	0	0	0.33088	0.605311	0.312076	0.332886	0.513667	0.371505	0	0.350802	0.227015	0.345878	0.294647	0.573368	0.6161	0.32109	0.519724	0.435647	0.534958	0.572025	0.592492	0.347808	0.220444	0	0.342892	0.431786	0.306433	0.33356	0.415871	0.354748	0.464874	0.393338	0.230041	0.340002	0.380647	overlap
Akap13	0.837248	0.9892	0.561833	0.687225	0.898024	0.618601	1.02555	1.19891	0.959335	1.19398	1.389	1.01647	0.839766	1.22279	1.31753	1.69714	1.62773	0.32109	1.45707	1.06655	1.84189	1.55427	1.22422	1.2243	0.781121	1.13524	0.9976	0.720771	1.16869	1.2864	1.29436	1.04453	1.08735	1.11005	0.823396	1.31613	1.43217	overlap
Ankrd11	1.23224	1.45749	1.14724	1.09071	1.24936	1.01055	1.34441	1.36559	0.823677	1.36747	1.13495	1.20817	0.38257	1.1933	1.08483	1.48427	1.59659	0.32109	1.44019	1.24417	1.50815	1.23269	1.04307	1.28782	1.08471	1.56892	1.20049	0.921147	1.19763	1.14286	1.42054	1.2692	1.42376	1.29363	1.01795	1.31813	1.21415	overlap
Ankrd13a	0.3296	1.06515	0.988077	0.90918	0.832859	1.01586	0.894354	0.927593	1.01599	1.12045	1.26665	1.00645	1.14111	1.05351	1.12652	1.18877	1.30385	0.32109	1.0679	0.997161	1.30632	1.14389	0.879883	1.17094	0.685607	1.26252	0.933467	0.718826	1.10352	1.04511	1.247	0.894172	1.01429	0.994997	0.671016	1.09821	1.2005	overlap
Anks1	0.109566	0.305007	0.281556	0	0.256779	0.204547	0.228911	0.183499	0.364792	0.295733	0.856024	0.234487	0.227015	0.28097	0.262104	0.697484	0.641762	0	0.663671	0.338867	0.575656	0.874606	0.133236	0.323431	0.272115	0.612356	0.243458	0.281699	0.245326	0.29593	0.327013	0.188196	0.230515	0.273571	0.178758	0.287765	0.248195	overlap
Arid5a	0.3819	0.291403	0.490823	0	0.23909	0.0668846	0.327742	0.240994	0.0901543	0.262637	0.720752	0.236554	0.227015	0.288004	0.216373	0.652567	0.693464	0.32109	0.527842	0.303222	0.521318	0.475942	0	0.314482	0.457306	0	0.217601	0.376496	0.267409	0.253643	0.531574	1.20962	1.23513	0.434612	0.422604	0.494206	0.44711	overlap
Arpc3	1.36951	1.72042	1.507	1.78187	1.67638	2.04025	1.6776	1.66315	1.735	1.71817	2.03877	1.68006	2.18889	1.70128	1.66114	2.07201	2.09724	0.563756	1.87653	2.25905	1.92851	2.02742	1.90681	1.74689	1.5926	1.37541	1.65786	1.90872	1.68882	1.63787	1.59052	1.52054	1.58235	1.60443	2.09642	1.60928	1.56155	overlap
Asph	0.209807	0.155622	0.209267	0	0.184362	0.180162	0.168764	0.156059	0.343355	0.183642	0	0.18317	0	0.195533	0.150983	0.267451	0.293816	0	0.250201	0.229948	0.029114	0.309608	0.432323	0.159744	0.374196	0.612356	0.190593	0.172816	0.187072	0.201426	0.213413	0.183937	0.237316	0.242005	0.203494	0.202111	0.289276	overlap
Atp5o-1	1.27974	1.5146	0.59672	1.78187	1.56816	1.75464	1.22833	1.18516	0.959735	1.44137	1.06477	1.58962	1.67398	1.13184	1.04048	1.00559	1.31352	0.758884	1.34163	1.32618	0.843605	0.854365	1.17773	1.43882	1.07913	1.65324	1.56579	1.69905	1.18035	1.04402	1.31814	1.08904	1.34038	1.49233	1.42909	1.11182	0.977989	overlap
B3gnt5	0.033547	0.148564	0	0	0.115385	0.0454007	0.0946638	0.133193	0	0.272059	0	0.16574	0	0.160994	0.142809	0.691842	0.682354	0	0.608241	0.457449	0.738617	0.486142	0.373848	0.242313	0.180695	0.612356	0.143431	0	0.134447	0.123708	0.255154	0.208703	0.27101	0.18876	0.085458	0.17286	0.220835	overlap
Bcl11a	1.08188	1.2151	0.899916	0.401521	1.08649	0.72681	1.29103	1.14761	1.05991	1.01325	0.379251	0.856706	0.227015	1.10068	0.999275	0.794432	0.883922	0	0.645312	0.35839	0.929257	0.78877	0.945241	1.02699	1.17673	1.73099	0.918827	0.475457	1.17728	1.09121	1.28937	1.64115	1.67995	1.12406	0.594477	1.38499	1.22671	overlap
Cables1	0	0.035385	0	0	0.0305999	0.0384008	0.0464645	0.0512155	0	0.0489155	0	0.0550862	0	0.0823122	0.0692072	0.659718	0.442839	0	0.361519	0.454744	0.397499	0.476683	0.161014	0.0391745	0.0396713	0	0.0521696	0	0.0506009	0.067926	0.0466396	0.0330454	0.027033	0.0458817	0.135798	0.0469822	0.091471	overlap
Car2	1.93388	1.79218	0.736816	1.09071	1.55312	0.568962	1.66807	2.04905	2.15186	1.98571	1.77221	1.63887	0.596747	1.9176	2.27404	1.82765	1.71209	0	1.55899	0.588659	1.80773	2.13527	1.99168	1.85405	1.58609	1.13524	1.49163	0.332554	1.85665	2.19698	1.70293	1.9788	1.73806	1.37397	0.458703	1.6815	1.99049	overlap
Cbarp	0	0.0208174	0	0	0.0297005	0	0.0318827	0.040141	0.120145	0.00519673	0	0.036393	0	0.0213014	0.0408775	0.0850306	0.0659613	0	0.0420943	0.0244484	0.0467298	0.232595	0	0.0139078	0	0	0.0134723	0.195691	0.0296027	0.0503958	0.00980226	0.0163489	0.0159324	0.0191159	0.0379265	0.0284479	0.0486053	overlap
Cbfa2t3	0.766858	0.938999	0.675887	0.687225	0.812073	0.958548	1.00863	1.16971	0.399986	0.845189	1.62879	0.707189	1.26251	0.884273	1.06465	0.519357	0.530613	0	0.448519	0.44773	0.964133	0.701797	0.133236	0.714656	0.675684	0	0.608672	0.332554	0.873171	1.03145	0.859519	0.397704	0.475666	0.736142	0.546481	1.02952	1.04697	overlap
Ccnt1	0.58072	0.360712	0.178481	1.09071	0.395645	0.239293	0.349446	0.522246	0.946945	0.322593	0.379251	0.39878	0.227015	0.291319	0.657664	0.454611	0.503751	0	0.418459	0.280687	0.366791	0.613714	0.689714	0.349602	0.32397	0	0.367587	0.291679	0.339062	0.653269	0.393894	0.49567	0.526573	0.412182	0.184353	0.385838	0.559528	overlap
Cdc42ep3	0.179934	0.478522	0.178481	0.401521	0.297021	0.381422	0.349369	0.353914	0.731946	0.595428	0.720752	0.459555	0.394895	0.586629	0.529492	0.171792	0.227965	0	0.192708	0.315805	0.323707	0.238161	0.612211	0.629384	0.509081	0.818528	0.432417	0.366305	0.587954	0.597039	0.567768	0.147522	0.226137	0.401536	0.342585	0.47218	0.485246	overlap
Cdk17	0.148576	0.287568	0.177517	0	0.239749	0.306419	0.21319	0.382814	0.326406	0.359424	0.379251	0.236816	0	0.232574	0.3338	0.472318	0.507761	0.32109	0.468158	0.25071	0.347642	0.714123	0.461544	0.345249	0.380057	0.352336	0.224693	0.193489	0.230702	0.356128	0.387256	0.258474	0.312642	0.280565	0.105631	0.232782	0.408682	overlap
Cdkn1a	0.126175	0.142757	0	0	0.167076	0.116574	0.0793628	0.266853	0.189028	0.124335	0	0.0924323	0.227015	0.0400232	0.261548	0.807828	1.08641	0	0.891187	0.419775	0.585076	0.652276	0	0.0700708	0.330995	0	0.107741	0.212511	0.0294971	0.197652	0.15802	0.760989	0.772375	0.1824	0.122159	0.113701	0.185333	overlap
Cdkn2d	0.330018	0.503192	0.178481	0.687225	0.252209	0.570279	0.267034	0.319752	0.277099	0.700299	0	0.326589	0.621911	0.263825	0.377885	0.479832	0.620058	0	0.443412	0.567074	0.472613	0.583714	0	0.702621	0.344979	0.352336	0.299392	0.506042	0.268573	0.436138	0.724313	0.369689	0.663919	0.347612	0.344398	0.299775	0.421498	overlap
Cebpb	0.738115	0.509828	1.54858	0.90918	0.72787	0.711861	0.704708	0.892269	1.26219	0.31173	0.720752	0.388677	0.227015	0.303622	0.745925	2.0352	1.99468	0	1.53756	1.42834	1.79195	2.4572	0.843108	0.30028	1.03868	0.352336	0.387643	1.14209	0.28896	0.83783	0.580691	1.40554	1.44434	0.651371	1.04504	0.779489	0.849535	overlap
Cenpb	0.55092	0.598511	0.565265	0.401521	0.694277	0.598342	0.545198	0.552953	0.627212	0.523414	0.379251	0.641903	0.227015	0.473744	0.518868	0.624323	0.60457	0	0.749638	0.552572	0.510613	0.714836	0.503004	0.539611	0.690849	0.989372	0.632559	0.718879	0.43835	0.527997	0.521613	0.466821	0.433927	0.652057	0.445114	0.566529	0.526211	overlap
Cers2	0.550444	0.756312	0.255896	1.24429	0.713771	0.676843	0.707979	0.777639	0.617081	0.630873	0	0.660244	1.28016	0.56087	0.666999	0.814357	0.755604	0.32109	0.812929	0.751806	0.770118	0.849267	0.896492	0.640944	0.705667	0.818528	0.645214	0.666586	0.602805	0.658273	0.629252	0.623212	0.663307	0.616075	0.671594	0.578342	0.611406	overlap
Cirbp	0.847657	0.5788	0.466128	0.90918	0.618968	0.321284	0.613833	0.723481	1.14478	0.860434	1.17583	0.790173	0.991642	0.741935	1.06913	1.49751	1.47668	0.758884	1.3834	1.25525	1.04652	1.60744	1.46201	0.910843	0.831726	0.818528	0.860081	0.607074	0.858404	1.13204	0.856722	0.618856	0.631255	0.890606	0.553349	0.89606	1.09022	overlap
Cish	0	0.0743847	0.209267	0	0.0736979	0	0.0777865	0.185532	0.250787	0.0691497	0.933919	0.051467	0	0.0871228	0.167415	0.364189	0.385978	0	0.283508	0.146287	0.137724	0.687026	0	0.0624934	0.210601	0.352336	0.0549507	0.116523	0.0790012	0.159559	0.273655	1.18709	1.03331	0.219841	0.119445	0.224382	0.555192	overlap
Cited2	0.633383	0.481084	0.916485	0.401521	0.391892	0.563745	0.432973	0.570864	0.461599	0.691901	0.921783	0.519714	0.621911	0.722267	0.854559	0.40614	0.323957	1.06235	0.301178	0.551896	0.318279	0.404803	1.00699	0.704516	0.990036	1.93346	0.533371	0.898858	0.7009	0.807873	1.16142	2.99943	2.52705	0.950904	1.01796	1.32145	1.67567	overlap
Clec2d	0.146974	0.264507	1.06473	0.687225	0.256328	0.296248	0.30728	0.314445	0.394284	0.409352	1.28393	0.346646	0.621911	0.542785	0.538087	0.132266	0.138905	0	0.124695	0.16379	0.168322	0.199487	0.460751	0.411566	0.93039	0.989372	0.3858	0.368645	0.597822	0.517034	0.710589	1.23471	1.17855	0.631023	0.518776	0.821959	0.976922	overlap
Clk1	0.803482	0.456647	0.209267	0	0.441109	0.355905	0.46644	0.881263	1.27507	0.653148	0.592418	0.570715	0.777465	0.667949	1.09501	1.0073	0.99089	0	0.804325	0.728598	0.974316	1.17961	1.0034	0.687399	0.763821	0.612356	0.525325	0.600489	0.65376	1.17078	0.667206	0.686807	0.542315	0.537219	0.382961	0.726733	1.01064	overlap
Cmip	0.372771	0.22855	0.209267	0.90918	0.259273	0.403796	0.269457	0.258755	0.254406	0.246278	0	0.233182	0.227015	0.26339	0.233501	0.449546	0.38979	0	0.327234	0.303901	0.43795	0.433156	0	0.256759	0.346998	0	0.19528	0.193489	0.273697	0.23627	0.293847	0.317991	0.3275	0.262272	0.317981	0.284816	0.323998	overlap
Cmtm7	1.92536	2.22158	1.54813	2.3871	2.01402	1.73763	2.03065	1.90432	2.38699	2.42135	2.44295	2.18817	2.35189	2.25898	2.0655	1.96263	2.22226	0.563756	2.0006	2.019	1.99514	1.57836	2.06409	2.32345	1.88723	2.28951	2.11713	2.43086	2.20708	2.01466	2.30502	1.69789	2.01607	2.17716	2.33563	2.15583	1.86155	overlap
Cnbp	2.39957	2.18011	1.87982	2.43151	2.36033	1.71019	2.27438	2.22826	2.15369	1.7908	2.03877	2.19122	1.60813	1.98295	1.94539	2.28383	2.1127	0.922082	2.40448	1.96164	2.08476	2.11397	2.11918	1.83215	1.93214	1.99277	2.19735	2.10873	1.97349	1.93831	1.82409	2.09813	1.98959	2.20749	1.63315	1.92354	1.88373	overlap
Cnpy2	1.10776	0.880491	0.469036	0.90918	0.846863	0.774017	0.77797	0.856973	1.07895	0.926539	0.921783	0.844712	0.895935	0.903471	0.841738	0.606478	0.758143	1.06235	0.744477	0.74378	0.768307	0.61702	0.756129	0.949819	0.83216	0.612356	0.877724	1.48747	0.818693	0.811466	0.882601	0.643902	0.741877	0.851836	0.718246	0.791758	0.76452	overlap
Commd3	0.526787	0.722401	0.434377	1.3774	0.73529	0.665445	0.640046	0.553098	0.683656	0.699455	0.68552	0.802358	0	0.661623	0.6067	0.526361	0.671519	0.32109	0.618881	0.539633	0.543602	0.438083	0.212499	0.760684	0.758035	0.989372	0.803075	1.15401	0.727523	0.603849	0.722147	0.622082	0.714913	0.742643	0.769106	0.660229	0.587208	overlap
Crem	0	0.0331183	0.0783793	0	0.0376405	0.0454007	0.0308498	0.0200709	0	0.0363025	0	0.0207241	0	0.053488	0.032041	0.30855	0.261974	0	0.167708	0.181328	0.333404	0.281603	0	0.0354065	0.053773	0	0.0343214	0.0769661	0.0580964	0.0367765	0.060552	0.154271	0.11225	0.0603141	0.0748354	0.0528952	0.0416878	overlap
Csnk1a1	1.04487	1.23503	0.459072	1.09071	1.11387	1.218	1.14874	1.18916	0.907124	1.17045	1.28393	1.02327	0.677045	1.15309	1.13235	1.2707	1.33586	0	1.1314	1.04342	1.33901	1.28308	0.86321	1.15011	1.18001	1.87042	1.06006	0.857946	1.10693	1.12552	1.28264	1.09685	1.2209	1.14482	0.909266	1.19545	1.11899	overlap
Ctla2a	3.04063	1.93619	1.85851	1.49485	2.00771	0.893877	2.25631	2.61026	3.10871	2.10832	2.61857	2.04141	1.03316	2.40188	2.7915	3.83257	3.11513	0.32109	3.11487	1.60992	3.38471	3.61803	3.06463	2.00605	2.54109	1.56892	2.02617	0.437301	2.30279	2.75855	1.96168	2.18523	1.7905	1.89453	0.460853	2.36738	2.57992	overlap
Ctla2b	0.189971	0.0182118	0	0	0.0359065	0	0.0412664	0.121639	0.116632	0.0220048	0	0.0401842	0	0.0234938	0.139256	0.301115	0.188674	0	0.147766	0.0859785	0.152906	0.406681	0.212499	0.0410611	0.148333	0	0.0363111	0	0.0533477	0.119965	0.0508241	0.0630493	0.0411338	0.0388407	0	0.0793089	0.156874	overlap
Cytip	0.395502	0.355993	0.404831	0.401521	0.24561	0.722893	0.288688	0.35513	0.434953	0.288028	0	0.24032	0.227015	0.351455	0.326606	1.30146	1.08665	0.563756	0.892608	1.1946	1.1799	1.02365	0.161014	0.299923	0.208386	0.352336	0.216083	0.445473	0.327237	0.357352	0.374395	0.619688	0.566642	0.280929	0.583054	0.377658	0.42442	overlap
D8Ertd738e	1.05092	1.06526	0.595135	1.09071	0.924891	0.885703	0.790013	1.02371	1.15372	1.0592	0.379251	0.959294	0.895935	0.715723	1.00007	1.12492	1.30212	0	1.09637	1.01612	1.00388	1.01784	0.897953	0.984661	0.911476	1.13524	0.914664	1.20883	0.775688	1.03165	0.893365	0.735652	0.938521	0.872763	0.840707	0.713861	0.807843	overlap
Dapp1	0.876273	1.12745	0.565265	1.49485	1.03233	0.654888	1.14855	1.08587	1.20038	1.20617	1.62879	1.12921	1.14111	1.24143	1.28935	0.83073	0.921642	0	0.903703	0.956262	1.03877	0.866285	0.921631	1.22401	1.21887	0.818528	1.11942	0.549314	1.29551	1.22747	1.23765	1.33221	1.23014	1.09173	0.846433	1.28241	1.24283	overlap
Dazap2	0.813217	0.836139	0.916485	0	0.714882	0.955112	0.721507	0.803637	0.992324	0.89658	0.741395	0.771512	1.26502	0.822399	0.867616	1.05125	1.14601	0	0.948585	1.01329	1.12306	0.979231	0.271308	0.937804	0.868064	0.818528	0.78371	1.13605	0.838531	0.885635	1.03288	0.799451	0.8963	0.816671	0.747267	0.894786	0.875217	overlap
Ddit4	0.0897942	0.0572054	0.209267	0	0.0369134	0.0611382	0.0646444	0.144887	0.12391	0.0628089	0	0.0421578	0	0.12707	0.140057	0.402721	0.480987	0	0.311609	0.435011	0.540996	0.517116	0.138072	0.063408	0.053773	0	0.0484217	0	0.11736	0.130556	0.0559598	0.0292305	0.0147282	0.0368534	0.0300309	0.0768438	0.0887533	overlap
Dennd4a	0.295681	0.206316	0	0.401521	0.184067	0.24515	0.119434	0.349284	0.116573	0.138627	0.379251	0.124727	0	0.145425	0.397256	0.778372	0.643634	0	0.440025	0.392082	0.606068	1.08211	0	0.184244	0.399034	0	0.146469	0.193489	0.151465	0.512551	0.215339	0.841455	0.696746	0.205209	0.182731	0.166696	0.414794	overlap
Dguok	0.556329	0.647278	0.209267	0.90918	0.556862	0.425987	0.592605	0.710601	1.02379	0.743746	0.341502	0.708909	0.227015	0.776694	0.802001	0.565236	0.587448	0.32109	0.520205	0.435123	0.638989	0.615103	0.682955	0.71795	1.00873	0.352336	0.686403	0.356094	0.775692	0.785699	0.717764	0.597632	0.626289	0.662199	0.587705	0.70546	0.697021	overlap
Dnajb6	0.884458	0.831173	0.751664	1.09071	0.8078	0.76762	0.73969	0.718736	0.364604	0.703447	1.06477	0.744579	1.14655	0.690046	0.774259	0.888263	0.9131	0	0.894267	0.907459	0.678453	0.81322	0.501728	0.796549	0.559502	0.612356	0.756932	0.912536	0.757369	0.772078	0.772584	1.09226	1.04918	0.788985	0.99822	0.755322	0.760873	overlap
Dusp2	1.19572	0.698547	0.280277	0.687225	0.688846	0.276849	0.885949	1.02717	1.62419	0.652089	0.741395	0.608711	0	0.837147	1.19257	1.17677	0.892417	0	0.758441	0.434028	0.986427	1.59633	0.887583	0.66657	0.899429	1.26252	0.623475	0.376629	0.778933	1.09913	0.493636	0.887047	0.589371	0.560226	0.232893	0.63795	0.740388	overlap
Dynll1	1.12966	1.89533	1.27308	2.06906	1.75213	1.66359	1.53427	1.17674	1.35437	1.55685	1.62879	1.45796	1.884	1.2329	0.909093	0.818692	1.23792	0.32109	1.26354	1.27984	0.901096	0.44746	0.461544	1.49382	1.30426	0.612356	1.50971	1.85362	1.25112	0.907363	1.46335	1.11051	1.52207	1.34514	1.53616	1.17334	0.7447	overlap
Dyrk3	0	0.149833	0	0.687225	0.140757	0	0.12334	0.184408	0	0.131299	0	0.128744	0.227015	0.102304	0.13742	0.175562	0.145703	0	0.170333	0.163507	0.0527484	0.410634	0	0.15175	0.244484	0	0.107039	0.193489	0.111919	0.194641	0.13003	0.264887	0.158044	0.148031	0.0152344	0.102159	0.198459	overlap
Eif1	2.93185	2.92517	2.63552	2.79221	2.86369	2.66937	2.87348	3.03989	2.96713	2.70046	2.69491	2.6375	2.69554	2.54434	2.86349	2.91064	2.95203	2.54455	2.82608	2.70799	2.83635	3.07401	2.87818	2.67766	2.61999	2.83619	2.66273	2.61487	2.52545	2.84922	2.67454	2.87789	2.89244	2.61618	2.51442	2.57274	2.73839	overlap
Eif4g2	1.35677	1.51442	1.08596	1.49485	1.38513	1.28619	1.37285	1.25643	0.994913	1.10329	1.42692	1.17314	0.99532	1.15434	1.03122	1.11833	1.24151	0.32109	1.20236	1.02179	1.16394	1.22415	1.29659	1.21421	0.946207	1.37541	1.15586	1.28996	1.12179	1.05072	1.36214	1.29427	1.45353	1.29639	1.21789	1.2177	1.17949	overlap
Elof1	0.430831	0.734012	0.567923	0.687225	0.760104	0.585794	0.525577	0.491736	0.59059	0.770926	0.720752	0.822284	0	0.492266	0.443587	0.344644	0.574924	0.32109	0.641816	0.507631	0.458552	0.23463	0.474239	0.782228	0.719487	0	0.755763	0.738192	0.507751	0.476555	0.663553	0.390689	0.633017	0.666224	0.601152	0.41925	0.419066	overlap
Emb	0.998257	1.19968	0.986908	0.90918	1.17855	1.1011	1.2238	0.707851	1.51825	1.22387	1.27794	1.16445	1.25603	1.36964	0.698896	1.56955	1.57052	0	1.29684	1.52921	1.53625	0.980009	0.977072	1.26597	1.01272	2.04875	1.24996	1.8871	1.36038	0.779113	1.31831	0.996806	1.25914	1.28709	1.26619	1.35426	0.828396	overlap
Emd	0.361694	0.558571	0.466128	0.90918	0.651115	0.620697	0.487902	0.458955	0.337935	0.583616	0.341502	0.643124	0.621911	0.487465	0.587234	0.629429	0.778623	0	0.776156	0.66682	0.496668	0.656774	0.469594	0.583258	0.575293	0.989372	0.665415	0.7195	0.498126	0.49189	0.586947	0.511184	0.618987	0.630302	0.40491	0.432187	0.507775	overlap
Epb41	0.183022	0.254522	0.0783793	0	0.245456	0.0402551	0.247133	0.379544	0.39127	0.176958	0	0.212552	0.621911	0.166367	0.309538	0.300842	0.252357	0	0.290975	0.169928	0.214753	0.527191	0.31397	0.172124	0.257625	0.352336	0.191551	0	0.173668	0.286776	0.229918	0.236873	0.160395	0.206707	0.309893	0.216132	0.290828	overlap
Etfb	1.11231	1.23668	0.989868	1.09071	1.28683	1.02842	1.09833	1.01619	1.21919	1.31784	1.28393	1.36579	1.26251	0.971348	1.03671	0.786723	0.968827	0.563756	1.01794	1.15458	0.854611	0.62661	0.999554	1.23631	1.15061	1.26252	1.30215	1.64885	1.11416	0.985091	1.18984	0.974834	1.10881	1.273	1.39407	1.02879	0.942354	overlap
Fabp5	0.476309	0.675843	0.500043	1.24429	1.19514	0.749624	0.638831	0.523738	0.446155	0.481972	0.921783	1.02647	0.50104	0.46668	0.423594	0.586874	0.519012	0	1.18214	0.615435	0.403512	0.389004	0.50489	0.481329	0.680699	1.37541	1.03735	1.04135	0.432015	0.419162	0.402591	0.516916	0.563909	0.976814	0.455231	0.413848	0.309357	overlap
Fam107b	0.815428	0.594834	0.499078	1.09071	0.539701	0.682976	0.57677	0.642299	1.02665	0.743949	0.379251	0.624337	0.99532	0.849874	0.931599	1.01855	1.04394	0.563756	0.885279	1.28819	1.10099	1.10165	0.910477	0.78393	0.704041	0.352336	0.673075	1.02204	0.846714	0.96232	0.840746	0.545875	0.649037	0.71219	1.18147	0.845028	0.875234	overlap
Fam162a	0.793849	0.711585	0.565265	0.401521	0.857998	0.409365	0.685994	0.632542	0.340149	0.62075	0.542532	0.840348	0.50104	0.589797	0.56903	0.418777	0.426183	0.32109	0.654737	0.475333	0.301651	0.36623	0.503004	0.573153	0.210471	0.612356	0.797197	0.977723	0.531486	0.474611	0.52149	0.599328	0.572028	0.759875	0.462062	0.481587	0.539922	overlap
Fam212a	0.731392	0.595875	0.209267	0.90918	0.589476	0.165527	0.675249	0.629789	0.43426	0.49503	0	0.478768	0	0.561177	0.576421	0.191037	0.191311	0	0.179769	0.153927	0.239984	0.213312	0.407186	0.493966	0.235143	0.352336	0.499915	0.472617	0.559722	0.546818	0.348347	0.109515	0.139825	0.384093	0.19047	0.411292	0.378982	overlap
Fam96a	0.76616	1.02464	0.355998	0.687225	1.07719	1.24166	0.907583	0.828066	0.867582	1.0861	0.887398	1.13578	1.55418	0.954279	0.844788	0.832106	1.03256	0	0.948048	1.16421	0.884293	0.610322	0.943989	1.10021	0.760176	0.612356	1.10319	1.40825	0.898868	0.803986	1.08126	0.780636	0.936356	1.04973	1.05043	0.891144	0.797634	overlap
Fbxo9	0.256512	0.352437	0	0.687225	0.324663	0.395911	0.306832	0.44241	0.691535	0.372412	0.720752	0.391209	0.38257	0.375221	0.5097	0.901164	0.557745	0.32109	0.674549	0.662567	0.587193	1.07146	0.664018	0.334731	0.398301	0.818528	0.368476	0.487446	0.404679	0.549707	0.410288	0.620949	0.497114	0.403076	0.554034	0.460589	0.74684	overlap
Fchsd2	0.635992	0.745366	0.945773	0.401521	0.701808	0.56445	0.784144	0.901218	0.519994	0.760683	0	0.678001	0.227015	0.76871	0.740709	0.453821	0.487403	0	0.41608	0.232162	0.477235	0.488528	1.05114	0.728065	0.839667	0.612356	0.663683	0.331203	0.766012	0.806392	0.817583	0.822222	0.777562	0.698325	0.381585	0.809781	0.878668	overlap
Fgfr1	0.0760195	0.0280476	0.354326	0	0.0332642	0.099539	0.026579	0.0560124	0	0.024418	0	0.049164	0	0.0390212	0.0523809	0.183709	0.134816	0	0.123368	0.100156	0.0624324	0.241224	0	0.0207163	0.046869	0	0.0301264	0	0.0431521	0.106865	0.0521246	0.0549031	0.0477486	0.0468273	0.0338992	0.0340835	0.0619726	overlap
Fkbp5	0.0675525	0.303593	0	0.90918	0.427611	0.257079	0.300963	0.239529	0.173614	0.214829	0.341502	0.338941	0.621911	0.172345	0.148119	0.434708	0.461354	0	0.517635	0.285969	0.369124	0.310437	0.318806	0.192944	0.0396713	0	0.33654	0.249782	0.190578	0.0926891	0.350238	0.270572	0.328068	0.38985	0.208348	0.227959	0.244433	overlap
Fos	2.1128	0.425708	0.671672	0	0.516891	1.08752	0.525055	1.80759	2.43743	0.878007	0.379251	0.91847	0.394895	1.02021	2.37575	1.48078	1.35099	2.31126	1.18038	2.04923	1.80032	1.66235	1.95632	0.672991	1.4091	0	0.737428	0.620579	0.835376	2.41679	0.866424	1.37429	0.925151	0.942981	1.13785	1.36439	2.33744	overlap
Fosb	1.00063	0.224782	0.395309	0	0.275823	0.444082	0.289419	0.727347	0.517263	0.601021	0.949212	0.634004	0.50104	0.710876	1.26278	0.47286	0.445989	2.273	0.50409	1.24167	0.513859	0.584855	0.857491	0.59048	0.946544	0	0.617584	0.758142	0.719907	1.48165	0.70415	1.06553	0.773553	0.683063	0.688781	0.792934	1.60262	overlap
Fosl2	0.142255	0.0303299	0	0	0.0557732	0	0.056087	0.201709	0	0.0593532	0	0.0572757	0.38257	0.0624122	0.205638	0.704287	0.608056	0	0.409704	0.279758	0.595518	1.00145	0.133236	0.028421	0.119821	0.352336	0.0364601	0	0.0237838	0.219904	0.0754904	0.303636	0.14537	0.0491236	0.119829	0.0783118	0.166914	overlap
Foxn3	0.297475	0.537853	0.209267	0.687225	0.337374	0.196225	0.39713	0.568089	0.922911	0.684552	0.341502	0.441331	0.227015	0.586377	0.776011	0.841013	0.902027	0.563756	0.660728	0.455465	0.902282	0.913943	0.44504	0.774739	0.609583	0.989372	0.454575	0	0.610231	0.841065	0.841199	0.596371	0.686916	0.553376	0.359667	0.678256	0.907106	overlap
Foxo1	0.112382	0.0714966	0	0.401521	0.040418	0.0867522	0.0495194	0.0576326	0	0.0621683	0	0.0443267	0	0.0340517	0.0991541	0.185514	0.168482	0	0.0811116	0.100675	0.117293	0.308574	0	0.0506367	0	0	0.0355358	0	0.0516076	0.0882901	0.095948	0.0559133	0.0782947	0.0523315	0.0155872	0.0429514	0.107459	overlap
Fut8	1.18623	1.08745	0.994864	1.3774	0.970888	0.86503	1.04002	1.33618	0.495531	0.760582	1.54154	0.666392	0.227015	0.745846	0.824019	0.521579	0.589571	0.32109	0.624384	0.690921	0.722694	0.551422	0.793008	0.877467	0.587535	0.352336	0.727026	0.515832	0.759655	0.906153	0.87264	1.13994	1.02784	0.771278	1.04354	0.759493	0.946509	overlap
Galc	0	0.0620342	0	0	0.0365479	0	0.0455008	0.0772839	0	0.0785351	0	0.0459304	0	0.0842387	0.113945	0.209956	0.20635	0	0.200149	0.0456203	0.252668	0.509918	0.180734	0.084553	0.144493	0	0.0692214	0.212511	0.0664449	0.0938369	0.105127	0.0479866	0.0939872	0.0617088	0.0155872	0.0788394	0.15204	overlap
Gcnt2	0.786687	0.922211	0.457679	0.687225	0.819764	0.246228	1.13082	1.18494	1.16233	0.948424	1.49174	0.821825	0.50104	1.20569	1.19612	0.904651	0.799821	0	0.721841	0.276744	1.00379	0.877169	0.985601	0.863468	1.15555	1.13524	0.772902	0.556633	1.15035	1.17207	0.903536	0.728492	0.582524	0.806322	0.267101	1.16197	1.1622	overlap
Gfi1b	0.137331	0.12349	0	0	0.138431	0.0930214	0.0652385	0.142334	0	0.119725	0	0.133841	0	0.138682	0.198117	0.00887253	0.0183888	0	0.0319121	0.0239429	0.0602051	0.0199267	0	0.140096	0.0436273	0	0.106922	0	0.117144	0.147546	0.0929215	0.0353191	0.0712647	0.0565614	0.16691	0.0831948	0.123056	overlap
Gimap1	0.864884	0.799539	0.805929	0.401521	0.66838	0.122983	0.804847	0.92422	1.14461	1.01591	1.53797	0.736394	0.677045	1.11601	1.28178	0.688493	0.686962	0.563756	0.603326	0.464278	0.635803	0.698793	1.05821	0.962162	0.768408	1.37541	0.784288	0.344614	1.08832	1.25542	1.03352	0.841993	0.877722	0.769769	0.4124	1.02539	1.20959	overlap
Gimap6	1.06535	0.630557	0.280277	0	0.460629	0.181893	0.677372	0.818514	1.13778	1.01351	0.741395	0.770522	0	1.19365	1.37591	0.945535	0.905446	0.563756	0.63595	0.340266	1.01018	1.03968	1.30269	1.00475	1.10414	1.87042	0.790873	0.0959884	1.19203	1.41441	0.969066	0.881562	0.834771	0.761905	0.223801	1.12383	1.30393	overlap
Glul	0.750827	0.531495	0.387749	0	0.48275	0.23195	0.61158	0.863046	0.754428	0.595688	0.341502	0.523073	0.596747	0.698823	0.957105	0.995404	0.837434	0	0.713629	0.628543	0.946027	1.23893	0.819615	0.606119	0.5748	0.352336	0.558732	0.116523	0.675566	0.966555	0.671676	0.69434	0.466356	0.53002	0.245178	0.732817	1.07526	overlap
Gm16286	0.871846	1.10732	0.945773	0.90918	1.2329	1.09455	1.14937	1.11176	1.15193	1.00765	1.28393	1.09134	1.2095	0.997736	0.972551	0.846177	0.82347	0.32109	0.975782	0.843109	0.763097	0.8246	1.24968	0.892145	0.680769	1.13524	1.09517	1.22657	1.01221	0.990204	0.882798	0.976855	0.966271	1.03078	0.981705	0.9082	0.901764	overlap
Gm19590	0.387574	0.197332	0.355998	0	0.149157	0.0402551	0.263048	0.450065	0.591619	0.543266	0.933919	0.347925	0.50104	0.734006	0.80623	0.481902	0.34547	0	0.256	0.133014	0.44639	0.633241	1.0404	0.491236	0.311016	0	0.369089	0	0.711616	0.921221	0.442759	0.255711	0.127782	0.282836	0.074775	0.601037	0.687269	overlap
Gpr132	0.151978	0.125678	0.177517	0.401521	0.140362	0.147053	0.172527	0.167022	0.156954	0.12503	0.341502	0.126278	0.227015	0.192266	0.226077	0.475941	0.467252	0	0.336433	0.260621	0.493496	0.456467	0.161014	0.131866	0.178947	0	0.119404	0	0.191244	0.221059	0.129249	0.225195	0.171269	0.138424	0.129943	0.195881	0.190503	overlap
Gpr146	0.250574	0.111318	0	0	0.0740878	0	0.137844	0.0810784	0.0668688	0.102846	0.379251	0.0576465	0	0.123546	0.095179	0.265738	0.29029	0	0.185061	0.166271	0.244889	0.275681	0	0.10769	0.100796	0	0.0546841	0.165176	0.09968	0.13319	0.18674	0.359329	0.313082	0.106527	0.104011	0.165447	0.171341	overlap
Gpr65	0.157347	0.191313	0.355998	0	0.138525	0.27239	0.160074	0.109093	0	0.118717	0	0.135314	0	0.175529	0.078776	0.547261	0.477793	0	0.492107	0.360001	0.587139	0.509371	0.180734	0.159096	0.296639	0.352336	0.142233	0.348242	0.157479	0.115202	0.194055	0.324378	0.30543	0.190463	0.219387	0.256039	0.201787	overlap
Gpx1	2.10419	2.18154	1.52374	1.93574	2.08214	2.56304	2.13482	1.9837	2.51981	2.42453	2.61172	2.27392	3.02253	2.31418	2.13107	2.06546	2.26067	0.563756	2.15684	2.43949	2.22178	1.75686	2.03754	2.48898	2.00449	2.28951	2.35162	2.83087	2.35397	2.17432	2.31412	1.83646	2.09368	2.27336	2.7677	2.21892	1.94192	overlap
Gramd1a	0.489777	0.457856	0	0.90918	0.292862	0.136626	0.43903	0.405801	0.416897	0.412404	1.06477	0.338991	0.227015	0.459636	0.392492	0.626815	0.609358	0	0.41484	0.374198	0.670108	0.587133	0.773226	0.450001	0.27465	0	0.285493	0.681835	0.447685	0.438417	0.470176	0.391014	0.427061	0.273746	0.175284	0.441824	0.383351	overlap
H2-Q4	0.262746	0.57801	0.398772	0.401521	0.340644	0.233602	0.368651	0.531687	0.527799	0.59366	0.856024	0.420171	0.50104	0.487854	0.519585	0.593473	0.849193	0	0.510395	0.295285	0.655821	0.826522	0.675398	0.557101	0.560887	0.352336	0.419894	0.0959884	0.475565	0.62442	0.702614	0.954065	0.987674	0.410137	0.224437	0.464652	0.743793	overlap
H2afz	2.33631	3.51163	2.12373	3.57197	3.26782	3.34771	2.30972	2.17002	2.41266	3.42464	1.91344	3.22695	3.19481	2.14874	2.04074	2.11232	3.35952	0.563756	3.28223	2.96877	2.10954	1.72739	2.01929	3.46984	2.06733	3.56142	3.21492	3.22594	2.05032	1.9296	3.30792	2.23727	3.29984	3.1168	2.95203	2.04588	1.82229	overlap
H3f3b	3.40329	3.10853	2.39121	3.20747	2.93511	2.98094	2.88566	3.44937	3.41448	3.2698	2.78651	2.9926	3.02482	3.02123	3.53064	3.45835	3.68742	2.34811	3.39035	3.48151	3.51615	3.45868	3.53262	3.21675	3.25829	3.28712	2.88954	2.87315	2.95625	3.44118	3.09444	2.89711	3.07797	2.83997	2.81075	2.95788	3.37114	overlap
Heatr5a	0.32158	0.373242	0.177517	0.687225	0.317599	0.230065	0.285306	0.356367	0.240541	0.359633	0.720752	0.320377	0.227015	0.235954	0.315341	0.462997	0.41858	0	0.344851	0.476066	0.578322	0.541994	0.294251	0.382996	0.167472	0	0.326748	0.172816	0.321243	0.341933	0.416522	0.305654	0.289307	0.35816	0.361607	0.319384	0.421575	overlap
Hhex	0.476603	0.888726	0.668026	0.90918	0.713884	0.407501	0.746758	0.692709	0.937428	0.923023	1.29071	0.758148	0	0.829415	0.793312	0.441628	0.543197	0	0.475509	0.283414	0.668428	0.319766	0.50136	0.921291	0.573802	0.352336	0.733813	0.494177	0.864873	0.701431	0.864164	0.274634	0.355518	0.648389	0.439509	0.74634	0.634169	overlap
Hk2	0	0.176476	0.177517	0	0.180612	0.170683	0.199372	0.260381	0.322245	0.0835377	0	0.0925856	0	0.0984511	0.0936897	0.189129	0.129769	0	0.148467	0.133929	0.0972579	0.333971	0	0.0457353	0.0919079	0	0.0919579	0.193351	0.0621201	0.0882342	0.0788037	0.316801	0.205298	0.145477	0.298034	0.134002	0.206032	overlap
Hlf	1.59669	1.19119	0.588137	0.401521	0.861416	0.363484	1.21059	1.74417	1.39371	1.29876	1.74342	0.944902	0.50104	1.34562	1.79345	0.916963	0.943182	0	0.753002	0.229687	1.06752	1.26273	1.36483	1.21443	1.15118	0	0.87994	0.48702	1.25329	1.70547	1.14463	0.592235	0.653238	0.797905	0.168502	1.20617	1.70784	overlap
Hmgb2	0.946353	3.30858	0.99513	3.18728	2.311	2.67254	1.10205	0.91528	1.45835	3.547	1.62323	2.56772	2.30346	1.41104	1.1898	1.75669	3.4936	0.32109	2.77848	2.52954	1.64393	1.52818	1.63093	3.61196	1.62662	3.92871	2.56557	2.85691	1.38054	1.21695	3.51726	1.34085	3.28646	2.52999	2.42226	1.33171	1.10341	overlap
Hmox2	0.835775	0.712621	1.03439	0.687225	0.717062	0.62808	0.638089	0.629202	0.306307	0.798146	0.741395	0.77228	0.38257	0.713259	0.682472	0.52222	0.654027	0.32109	0.623535	0.542398	0.373935	0.54892	0.474985	0.739548	0.753509	0.612356	0.753391	0.656395	0.748291	0.656994	0.712357	0.804748	0.868951	0.717135	0.448074	0.699598	0.733204	overlap
Hnrnpd	1.5777	1.61639	0.796842	1.59995	1.82113	1.54184	1.46316	1.31264	0.991793	1.2417	0.542532	1.57258	1.30489	1.05082	0.89636	1.26608	1.39201	0.922082	1.69119	1.42238	1.255	1.0262	1.35476	1.21594	1.02874	1.47684	1.55758	1.46508	0.973171	0.92815	1.30021	1.25607	1.43975	1.61623	1.30238	1.08319	1.01914	overlap
Hnrnpdl	0.93908	1.18545	0.280277	0.90918	1.10494	0.923008	0.911496	0.946387	0.989248	0.917882	0	0.916317	1.2095	0.606997	0.660256	1.04616	1.2291	0.32109	1.28521	1.13242	0.753577	0.904291	1.24388	0.922543	0.516732	1.56892	0.917652	0.779475	0.653486	0.649266	0.965916	0.855025	1.0076	0.991673	0.707417	0.673806	0.69562	overlap
Hoxa5	0	0.0798644	0.280277	0	0.0669762	0.0384008	0.103229	0.136276	0.0901543	0.157415	0	0.0555979	0	0.119586	0.150532	0.131241	0.129661	0	0.0824533	0.0419176	0.210171	0.320074	0	0.156802	0	0.352336	0.0727103	0.165176	0.119798	0.147153	0.1146	0.0668042	0.074053	0.102099	0.0549582	0.13787	0.198999	overlap
Hspa4	1.14849	1.25185	0.809276	1.24429	1.39663	1.02412	1.18482	1.02228	0.928799	0.778106	0.921783	0.992181	0.621911	0.712281	0.643189	0.914597	0.887307	0.32109	1.02631	0.704475	0.822028	0.941739	0.782539	0.734531	0.709444	1.56892	0.95493	0.747635	0.691117	0.605548	0.805647	0.887201	0.899733	0.968455	0.70172	0.678461	0.646253	overlap
Hspa8	3.32203	3.31448	2.83378	3.45423	3.62834	3.43951	3.29983	3.14025	3.00608	3.13608	3.49156	3.34841	2.96996	3.03087	2.94299	2.76929	2.81064	1.64189	3.11412	2.98594	2.7526	2.57589	3.13873	3.2034	3.22268	3.31819	3.38124	3.37882	3.10897	2.96767	3.10977	3.05762	3.18843	3.09011	2.86621	2.964	2.75371	overlap
Hypk	0.652459	0.456494	0.386784	0.90918	0.496833	0.677072	0.435402	0.40697	0.757046	0.430788	0.592418	0.542074	0.38257	0.30217	0.330151	0.247677	0.27221	0	0.273869	0.233692	0.308519	0.275178	0.589482	0.411743	0.172188	0.352336	0.45636	0.615964	0.366609	0.394506	0.375325	0.373092	0.445668	0.446326	0.408048	0.384505	0.332468	overlap
Ick	0.197539	0.160193	0	0.401521	0.0912691	0	0.105565	0.129274	0.173614	0.195009	0	0.103978	0	0.134215	0.198588	0.268452	0.233012	0.32109	0.206917	0.155708	0.211708	0.356878	0.138072	0.18631	0.0712945	0.352336	0.106613	0.505508	0.139177	0.194858	0.224322	0.131455	0.171067	0.115154	0.0786182	0.167934	0.181377	overlap
Ier3	0.516772	0.333307	0.489544	0	0.321053	0.375173	0.347501	0.690267	0.951365	0.369331	0.592418	0.251087	0	0.35817	0.919085	0.74724	0.645286	0	0.503186	1.48257	0.748556	0.692521	0.271308	0.319468	0.555933	0	0.212243	0.344614	0.25514	0.851626	0.44915	1.04721	0.961397	0.358564	0.546252	0.491901	0.748967	overlap
Ifi47	0.309641	0.669787	1.61753	1.09071	0.568843	0.363318	0.634156	0.497509	0.455127	0.577181	0.964229	0.58921	0.227015	0.581847	0.564826	0.265415	0.317692	0	0.283075	0.190129	0.225115	0.267338	0.180734	0.62599	1.63373	1.13524	0.564558	0.507196	0.627515	0.472176	0.950388	2.08454	1.93907	0.883123	0.886719	1.08946	1.17647	overlap
Ifitm1	3.03083	2.23181	2.51105	2.06906	2.25335	1.28746	2.92492	3.22564	2.27664	1.6005	3.11871	1.53623	1.13191	1.83191	2.53576	1.8629	1.30786	0	1.36293	1.77013	1.55869	2.63593	1.90965	1.49038	2.0016	1.47684	1.48603	1.07365	1.96742	2.5789	1.62925	2.60247	1.8578	1.5374	1.12062	2.03553	2.76305	overlap
Ifngr1	0.579026	0.466218	0.209267	0.401521	0.418316	1.04815	0.424632	0.523266	0.384007	0.557906	0.379251	0.476053	0.596747	0.598151	0.544585	1.8756	1.59099	0	1.43788	1.57433	1.53305	1.71692	0.723974	0.632471	0.511551	0.612356	0.525852	1.12242	0.62984	0.593994	0.588977	0.459125	0.514565	0.528554	1.21765	0.623058	0.561905	overlap
Il16	0.29778	0.378351	0.315479	0.401521	0.278691	0.43815	0.374612	0.293833	0.215912	0.535965	1.0829	0.442766	0.621911	0.593451	0.381426	0.252892	0.294923	0	0.186738	0.18164	0.563472	0.198579	0.583111	0.525128	0.396128	0.352336	0.45233	0.349485	0.580973	0.456029	0.492494	0.111285	0.193216	0.424319	0.481278	0.537227	0.331634	overlap
Il2rg	0.558829	0.291761	0.386784	0.401521	0.295122	0.182558	0.326017	0.385221	0.12391	0.311338	0.921783	0.324235	0	0.33206	0.380717	0.591524	0.494913	0.563756	0.481707	0.434886	0.649668	0.583639	0.138072	0.318976	0.598103	0.612356	0.311268	0	0.344696	0.447384	0.406365	0.937248	0.758991	0.401449	0.264538	0.398649	0.485807	overlap
Il4ra	0.146595	0.243377	0	0	0.204884	0.188868	0.316141	0.181594	0.190067	0.13967	0	0.120935	0.227015	0.215964	0.127595	0.33374	0.302361	0	0.228331	0.133041	0.239983	0.330102	0	0.134999	0.154613	0	0.143335	0.489624	0.192548	0.142515	0.213285	0.57271	0.389064	0.203927	0.198465	0.242438	0.170367	overlap
Irf2	0.494296	0.674265	0.609753	1.09071	0.516153	0.180249	0.61093	0.744068	0.812084	0.846351	1.27794	0.651003	0.50104	0.796485	0.80363	0.498684	0.597128	0.32109	0.488439	0.247736	0.526796	0.610276	0.586544	0.820949	0.712177	1.47684	0.616162	0.546242	0.826938	0.844628	0.808911	0.830197	0.867406	0.668754	0.504383	0.792224	0.895738	overlap
Isy1	0.671831	0.376607	0.387749	0.401521	0.439821	0.327479	0.308472	0.309757	0.221362	0.352723	0	0.423193	0.227015	0.207591	0.271412	0.446775	0.514989	0	0.554616	0.438358	0.356077	0.471502	0.212499	0.388183	0.243322	0.352336	0.437468	0.435493	0.296312	0.305208	0.327153	0.30527	0.373791	0.395559	0.322412	0.308	0.283273	overlap
Jdp2	0.068451	0.165582	0.280277	0	0.154343	0.127486	0.153315	0.174097	0	0.106426	0	0.10591	0	0.122958	0.081254	0.48459	0.466516	0	0.362808	0.384743	0.473202	0.327182	0.161014	0.10295	0.036373	0	0.107442	0.366305	0.123106	0.094572	0.0945191	0.076897	0.0827448	0.116407	0.102955	0.0859606	0.0874761	overlap
Jun	2.06393	1.0276	1.21664	0	1.01293	1.34485	1.38515	2.1697	2.5085	1.52609	1.64232	1.47002	1.96314	1.77969	2.46744	1.72086	1.55205	2.75789	1.33233	2.20499	1.69133	1.60678	1.6318	1.47162	2.15267	1.65324	1.43	1.18667	1.69734	2.71658	1.6574	2.77567	2.28704	1.56479	1.63843	2.12673	2.77737	overlap
Jund	2.40573	1.25854	1.19343	0.90918	1.41284	1.41867	1.77689	2.53065	2.50303	1.29051	0.949212	1.35694	1.87532	1.75167	2.46345	2.08259	1.60325	2.6023	1.53851	2.15939	1.94014	2.45587	1.83961	1.21926	2.27374	1.13524	1.2956	0.736267	1.76942	2.60823	1.4343	2.36134	1.85314	1.50785	1.35024	2.02553	2.70243	overlap
Kcnq1ot1	1.974	1.93672	1.63555	2.43151	1.85355	1.00194	2.06582	2.03671	1.89402	1.769	1.55665	1.78599	0.746214	1.8098	1.80328	1.5629	1.50108	1.06235	1.47754	1.08329	1.35922	1.90651	1.35432	1.68463	1.90926	1.73099	1.71407	1.33163	1.80546	1.73121	1.68392	1.6384	1.72771	1.66975	1.15793	1.77215	1.82273	overlap
Kdm6b	0.226479	0.113719	0.177517	0	0.116313	0.295039	0.18314	0.263085	0.164321	0.134839	0	0.110658	0	0.161351	0.227867	0.350815	0.36531	0	0.229373	0.264792	0.334163	0.285128	0	0.131303	0.082116	0	0.106822	0.135512	0.201731	0.327556	0.190128	0.634393	0.573412	0.145361	0.144438	0.235922	0.321457	overlap
Klf10	0.146387	0.23503	0.177517	0.687225	0.248773	0.228847	0.23036	0.261796	0.406244	0.160744	0.379251	0.20306	0.227015	0.226774	0.324853	0.33661	0.352925	0	0.302247	0.168753	0.290378	0.466403	0.180734	0.195285	0.141913	0	0.20389	0.289339	0.199273	0.361459	0.215347	0.148625	0.171156	0.221532	0.0989906	0.223828	0.275822	overlap
Klf13	0.23558	0.433111	0.563593	0	0.387613	0.341796	0.428373	0.386801	0.42579	0.356993	0.379251	0.309448	0.621911	0.280389	0.486794	0.768877	0.758172	0.32109	0.597935	0.675693	0.632735	0.866639	0.409658	0.327513	0.316531	0.352336	0.312191	0.368645	0.348347	0.431428	0.421306	0.323906	0.374837	0.317132	0.558321	0.400234	0.390269	overlap
Klf2	0.531899	0.137324	0	0	0.0900942	0.751217	0.110754	0.516815	0.920164	0.296943	0	0.126956	0.394895	0.15274	0.832877	0.780427	0.655145	0.32109	0.273461	0.521851	0.852501	1.29867	1.37244	0.327265	0.844139	0	0.186785	0.348024	0.20704	1.13991	0.358166	0.406528	0.375299	0.195194	0.436855	0.367161	0.768688	overlap
Klf6	1.31257	0.351124	0.355998	0.401521	0.184055	0.658468	0.232351	0.913948	1.19446	0.652761	0	0.318608	0.50104	0.455996	1.16969	0.972963	0.67444	0.32109	0.544682	1.33751	1.04844	1.13104	1.55061	0.536418	1.02827	0.352336	0.267615	0.195691	0.411927	1.28064	0.702775	1.615	1.13244	0.441901	0.638717	0.823302	1.68188	overlap
Klf9	0.248608	0.129138	0	0	0.0973259	0.0384008	0.102725	0.400637	0.59803	0.140081	0.379251	0.092516	0	0.126791	0.504995	0.607986	0.535178	0	0.449857	0.282499	0.262202	0.96538	0.276422	0.105324	0.257048	0	0.0862718	0	0.0955272	0.471741	0.125477	0.391683	0.31427	0.0733951	0.1008	0.140047	0.500473	overlap
Krcc1	0.20501	0.589427	0.52571	0.401521	0.414415	0.929963	0.394112	0.452248	0.346192	0.751229	0.592418	0.60562	0.777465	0.583924	0.545773	0.399124	0.566859	0	0.404899	0.424357	0.584945	0.34816	0.350571	0.734519	0.769093	0	0.590958	0.714765	0.603056	0.57542	0.769737	0.582382	0.699661	0.595907	0.807175	0.604528	0.614239	overlap
Lamtor4	1.04556	0.702748	0.643644	0.90918	0.59525	0.701011	0.666184	0.659354	0.510136	0.773972	0.921783	0.763844	1.14111	0.795153	0.679839	0.613482	0.681721	0.32109	0.59588	0.955947	0.590906	0.480861	0.678974	0.765343	0.628364	0.352336	0.703801	0.853832	0.790374	0.682564	0.734622	0.467473	0.552519	0.690683	1.01469	0.728874	0.602704	overlap
Lemd2	0.367334	0.308111	0.209267	0.401521	0.288031	0.418859	0.300908	0.308701	0.55545	0.211816	0.720752	0.243781	0	0.284108	0.273128	0.447002	0.41126	0	0.347206	0.267557	0.310547	0.484756	0	0.278468	0.164439	0	0.238925	0	0.259062	0.309467	0.264428	0.202552	0.257148	0.280282	0.280047	0.305322	0.327656	overlap
Lrrc8d	0.245964	0.178852	0	0	0.147159	0.395289	0.1949	0.183822	0.166782	0.184961	0.933919	0.151548	0.227015	0.200938	0.237795	0.483644	0.488627	0.32109	0.353577	0.303247	0.505662	0.400698	0.331523	0.224628	0.110354	0.352336	0.193828	0	0.191841	0.247513	0.211483	0.142779	0.140499	0.214105	0.0223659	0.255234	0.233217	overlap
Lsm2	0.798253	1.40286	0.601838	1.69504	1.38143	0.93418	0.855178	0.837262	0.830929	1.18005	0.341502	1.22871	1.14111	0.673535	0.604273	0.61693	0.985189	0	1.17475	0.762512	0.572169	0.457697	0.630609	1.12923	0.775237	0.989372	1.2511	0.957339	0.643019	0.544541	1.08574	0.715393	1.15475	1.18477	0.861139	0.579733	0.617558	overlap
Luc7l2	1.09595	1.27726	1.32732	0.90918	1.29928	1.32214	1.24632	1.34775	1.19181	1.3648	1.71325	1.30815	0.746214	1.32286	1.41855	1.51532	1.58959	0.563756	1.51508	1.38763	1.45891	1.62525	1.37254	1.26786	0.979359	1.37541	1.26742	1.18458	1.32013	1.45544	1.37991	1.17415	1.27742	1.3192	1.14181	1.33947	1.42904	overlap
Luc7l3	0.985141	1.00546	1.11175	1.49485	1.05596	0.871077	1.01388	0.843976	0.717469	0.779414	1.06477	0.989282	1.07194	0.865448	0.673581	0.415369	0.510981	0.32109	0.560498	0.440991	0.668112	0.501357	0.510295	0.815938	0.965819	0.818528	0.945259	1.00185	0.847992	0.630386	0.870803	0.801283	0.928315	1.00903	0.840023	0.881258	0.659512	overlap
Lyl1	1.14058	1.01814	0.386784	1.09071	0.860955	0.299118	0.980699	0.9741	0.929788	0.877973	1.29071	0.835882	0.806967	0.925913	0.882617	0.404711	0.521464	0	0.413064	0.279204	0.783836	0.413373	0.829841	0.908712	0.785458	0.352336	0.809637	0.700127	0.862047	0.813295	0.851729	0.416756	0.655256	0.740612	0.375452	0.877685	0.736141	overlap
Maff	0.231848	0.0194441	0	0	0.0172682	0	0.0203138	0.143323	0.447197	0.0182571	0	0.0264951	0	0.00984876	0.154233	0.171478	0.0856819	0	0.0970401	0.0921489	0.0904753	0.376584	0	0.0235033	0.133204	0	0.0273375	0	0.014028	0.223711	0.0278238	0.282572	0.2007	0.0272842	0.0534796	0.0169074	0.200211	overlap
Man2a2	0.269425	0.227759	0.178481	0	0.243081	0.21311	0.287265	0.24436	0.216544	0.233722	0	0.219641	0.227015	0.273767	0.269881	0.439631	0.436804	0	0.398595	0.33194	0.525272	0.551825	0.161014	0.195766	0.117979	0.612356	0.230447	0.435493	0.31649	0.268355	0.197385	0.16298	0.134946	0.272701	0.210199	0.287553	0.301454	overlap
Map2k3	0.590758	0.507879	0.255896	0.401521	0.494614	0.400655	0.389603	0.405644	0.439669	0.341447	0.379251	0.400115	0.227015	0.274237	0.382094	0.695795	0.736016	0	0.616703	0.581578	0.536828	0.648141	0.299086	0.344933	0.254994	0.352336	0.359759	0.212559	0.303697	0.346454	0.36916	0.581267	0.583347	0.390779	0.342836	0.319785	0.31265	overlap
Mat2a	1.52213	1.61611	1.38686	1.59995	1.81977	1.38632	1.75864	1.58045	1.27885	1.09434	0.341502	1.45027	1.64591	1.21987	1.14992	1.42409	1.09817	0.563756	1.37804	1.0557	1.0452	1.39628	1.29562	1.11933	1.11175	1.26252	1.418	1.40354	1.25138	1.0578	1.22235	1.36667	1.33401	1.5183	1.11835	1.26127	1.18284	overlap
Mcl1	1.00227	0.815688	0.997449	0.90918	0.783595	1.10856	0.8536	1.14159	1.48241	0.789231	0.542532	0.673235	1.2095	0.760448	1.3291	1.34044	1.21964	0	1.10503	1.19616	1.05844	1.44748	1.20161	0.740753	1.16186	0.818528	0.667384	0.644653	0.720153	1.27032	0.95209	1.48388	1.30345	0.876024	1.0473	1.08079	1.41902	overlap
Mcm3	1.12943	0.831254	0.909698	1.24429	1.56378	1.06484	0.958028	0.539822	0.676047	0.75814	0.887398	1.57477	1.91427	0.796784	0.557386	0.72968	0.940123	0	1.53711	0.984082	0.614857	0.482337	0.930612	0.828002	0.933563	0.612356	1.50945	1.23316	0.70033	0.426096	0.857463	0.839891	0.92658	1.57524	1.05697	0.682865	0.487688	overlap
Mcm6	1.15798	0.764921	0.281556	1.78187	1.71048	1.12984	1.1311	0.702081	0.801257	0.667444	0.964229	1.63945	1.3494	0.846473	0.661458	0.805168	0.87678	0	1.5796	0.941262	0.692195	0.447324	0.861107	0.71802	1.28205	0.352336	1.67956	1.34444	0.913547	0.596327	0.698489	0.979112	0.933989	1.66148	1.10335	0.881888	0.580577	overlap
Mcm7	0.83265	0.808433	0	1.69504	1.47105	1.14659	0.784764	0.358218	0.722604	0.85555	0.720752	1.48284	1.11379	0.749355	0.404122	0.670141	1.0423	0.32109	1.53059	0.996032	0.769248	0.34912	1.259	0.983083	0.794324	0.352336	1.53868	1.07738	0.685917	0.449657	0.933006	0.70265	0.895903	1.52346	0.968798	0.628832	0.332468	overlap
Mef2c	1.16743	1.35132	1.57243	0.401521	1.26508	0.831586	1.37641	1.25116	1.82674	1.4312	0.933919	1.33817	0.991642	1.5364	1.27632	1.72037	1.73917	1.39353	1.47114	0.751826	1.67882	1.59031	1.32694	1.42227	1.36734	2.4103	1.3521	0.861276	1.51288	1.30193	1.52234	1.1787	1.28857	1.41418	0.447881	1.55314	1.2927	overlap
Meg3	0.266821	0.0383803	0	0	0.0533324	0.0384008	0.0680495	0.304914	0.116632	0.01035	0	0.0131712	0	0.00808845	0.106815	0.0341779	0.00566485	0	0.0113811	0.0178623	0	0.430862	0.138072	0.00728777	0.105683	0	0.0132691	0	0.00712334	0.164471	0.00977658	0.0921012	0.0252706	0.0128521	0.0191026	0.0224329	0.241011	overlap
Mif	1.88766	1.72894	1.73801	2.3871	2.33446	1.78633	1.98071	1.78148	1.90961	1.49524	1.17583	2.27886	1.71386	1.58768	1.56652	1.63749	1.46867	0	2.20354	1.42938	1.48937	1.16599	1.82373	1.46454	2.04177	1.37541	2.28275	2.11956	1.65843	1.42939	1.36178	1.87898	1.76698	2.2684	1.50421	1.54984	1.47565	overlap
Mindy1	0.223077	0.0995448	0	0	0.0660544	0.0916425	0.0946426	0.196683	0.0570411	0.117783	0	0.0930863	0	0.0832575	0.236767	0.374898	0.309911	0	0.266091	0.210039	0.389563	0.520725	0	0.0972614	0.0759935	0	0.0735309	0	0.0993692	0.184525	0.1101	0.095728	0.0646735	0.100702	0.0460655	0.123417	0.214667	overlap
Mkrn1	0.460974	0.443904	0.0783793	0.687225	0.350916	0.872002	0.418237	0.422255	0.503671	0.509163	0.720752	0.404307	0.991642	0.45627	0.486838	0.670881	0.644185	0.563756	0.499727	0.652901	0.544832	0.699593	0.429779	0.444204	0.405085	0	0.397216	0.457894	0.449599	0.494345	0.43481	0.383872	0.363427	0.356068	0.564216	0.463818	0.484354	overlap
Mplkip	0.743495	0.688747	0.364523	0	0.616141	0.356648	0.607007	0.563767	0.309225	0.804917	0.720752	0.705068	0.621911	0.663516	0.601627	0.435814	0.561071	0	0.42008	0.44849	0.351233	0.393003	0.664018	0.849462	0.70637	0.818528	0.679489	0.571235	0.688757	0.619108	0.7299	0.46608	0.58112	0.629161	0.738733	0.635392	0.541707	overlap
Mrpl17	0.466505	0.815268	0.355998	0.687225	1.02141	0.906115	0.806047	0.692202	0.43613	0.536098	0.542532	0.824282	0.596747	0.595984	0.605012	0.484015	0.499097	0	0.629261	0.551508	0.427103	0.396996	0.687818	0.514896	0.570792	0	0.782693	0.900047	0.583353	0.506037	0.601597	0.677596	0.703874	0.77432	0.656462	0.558483	0.503223	overlap
Mrpl34	0.906288	0.78353	0.387749	0.401521	0.906441	0.663879	0.778415	0.691471	0.794508	0.850867	1.28393	0.943557	0.50104	0.739934	0.718083	0.637902	0.751622	0	0.736104	0.771464	0.699234	0.527648	1.15073	0.865852	0.660713	1.13524	0.942519	1.01643	0.814481	0.682086	0.783144	0.595312	0.6974	0.877099	0.66011	0.760976	0.624347	overlap
Mrpl51	0.607929	0.939792	0.857844	0.90918	0.915814	0.935762	0.68003	0.631683	0.443504	0.863019	0.856024	0.816866	0.61275	0.609506	0.501393	0.371624	0.59993	0.32109	0.713901	0.58481	0.530849	0.398122	0.311803	0.807312	0.675495	0.818528	0.854097	1.00706	0.573734	0.466049	0.781967	0.557969	0.775901	0.753117	0.8586	0.549875	0.415016	overlap
Mrps17	0.931097	0.875375	0.7398	0.687225	0.893758	0.52651	0.695957	0.670251	0.551157	0.787831	0.921783	0.810356	0	0.551396	0.513428	0.445667	0.596515	0.32109	0.673487	0.490521	0.456417	0.432788	0.781994	0.721043	0.533097	0.818528	0.774955	0.728978	0.561765	0.563464	0.686119	0.545592	0.725097	0.733665	0.585311	0.568789	0.494787	overlap
Msi2	1.31388	1.07432	1.11123	0.687225	1.01108	0.48593	1.08336	1.30609	1.49554	1.24286	0.542532	1.12203	0.596747	1.28575	1.39727	1.54611	1.39871	1.18533	1.34244	0.541151	1.39557	1.61101	1.51317	1.1995	1.12927	1.47684	1.13568	0.368645	1.33636	1.44866	1.30142	1.31532	1.23075	1.12863	0.439583	1.26556	1.4994	overlap
Mt1	0.169551	0.0746111	0.22635	0	0.149091	0.179954	0.0964878	0.0978766	0.0668688	0.0206482	0	0.0541647	0	0.0234322	0.0541077	0.143097	0.0955684	1.06235	0.114643	0.496888	0.079075	0.247206	0	0.0194046	0	0	0.039138	0.153794	0.0247045	0.032393	0.0117631	0.144571	0.0840627	0.0546701	0.408467	0.0480054	0.0876385	overlap
Mtdh	1.62083	1.69913	1.61968	1.86176	1.49047	1.17933	1.66595	1.56467	1.25424	1.58548	1.28393	1.40528	0.991642	1.62021	1.40092	1.14559	1.22098	0.922082	1.10967	0.775166	1.4934	1.21958	1.21624	1.5469	1.6694	1.73099	1.36352	1.18841	1.55312	1.33458	1.60589	1.55923	1.68403	1.44725	1.07476	1.60018	1.38022	overlap
Myb	1.29774	1.32412	0.930145	0.401521	1.17834	0.822511	1.23075	1.40602	1.39214	1.27921	1.47982	1.20205	0.394895	1.2107	1.11003	0.728022	0.963192	0	0.939206	0.947502	1.08635	0.597833	1.29241	1.25982	0.951185	1.37541	1.15964	1.11431	1.20456	1.07028	1.28358	0.580073	0.736879	1.18419	1.11124	1.07028	1.04348	overlap
Myc	1.03032	0.916849	1.09793	1.24429	1.16947	0.839374	1.30522	0.783499	0.682108	0.587268	0.964229	0.842487	0.50104	0.864412	0.692266	0.353644	0.344409	0	0.504224	0.486444	0.623453	0.250206	0.407335	0.705046	0.634928	1.37541	0.883202	1.10877	0.919812	0.566329	0.83859	1.23839	1.26448	1.02425	1.06767	1.00876	0.546307	overlap
Mycn	0.364672	0.235719	0.280277	0	0.415983	0.0402551	0.555695	0.500898	0.0974522	0.178259	0	0.159162	0	0.245702	0.366336	0.104266	0.0933984	0	0.070101	0.0570948	0.0189105	0.134957	0	0.136351	0.356418	0	0.153665	0	0.261849	0.383056	0.210591	0.254535	0.176053	0.199058	0.0417948	0.30387	0.423648	overlap
Myct1	0.623208	0.33341	0.280277	0.687225	0.298629	0	0.262358	0.612117	0.664316	0.572006	0.741395	0.421591	0	0.467428	0.869104	1.00231	0.946408	0	0.763336	0.279051	0.80928	1.10518	1.01613	0.606214	0.3217	0	0.408421	0	0.511556	0.892015	0.548304	0.317601	0.316437	0.321796	0.0719324	0.471346	0.783383	overlap
Myh9	0.747884	0.631653	0.355998	0.401521	0.633531	1.00303	0.585838	0.619556	0.367332	0.638571	0.379251	0.653954	0.991642	0.627696	0.521753	0.808964	0.784521	0.32109	0.764798	0.783972	0.948509	0.908792	0.212499	0.562257	0.549139	0.612356	0.581324	0.732693	0.532485	0.53817	0.685607	0.540117	0.561494	0.659553	0.770927	0.591981	0.674893	overlap
Nceh1	0.408358	0.343165	0.178481	0.401521	0.261622	0.0402551	0.302803	0.490134	0.703503	0.40046	0	0.265147	0	0.382223	0.672966	0.863604	0.626272	0	0.544472	0.374521	0.56402	1.1341	0.50136	0.353891	0.727609	0.352336	0.267225	0.331422	0.395284	0.660548	0.415994	0.954752	0.650809	0.335404	0.256712	0.457207	0.844731	overlap
Nek6	0.188061	0.209492	0.177517	0.401521	0.232055	0.173162	0.209863	0.148693	0.162932	0.115934	0	0.168043	0	0.138835	0.142286	0.436479	0.364541	0	0.413721	0.210191	0.325847	0.585828	0	0.0933528	0.160892	0	0.134295	0.299801	0.117816	0.120862	0.121682	0.144385	0.0881541	0.146294	0.132354	0.142413	0.0959058	overlap
Neurl3	0.355721	0.113788	0	0.401521	0.126689	0.0768722	0.178769	0.422803	0.712199	0.264911	1.13495	0.220845	0.227015	0.392741	0.696135	1.45891	1.12829	0	0.916658	0.733314	1.08422	1.77485	1.01216	0.25385	0.590829	0	0.193523	0.193489	0.422613	0.750595	0.242838	0.812242	0.476969	0.186105	0.125078	0.35834	0.730235	overlap
Nfe2	0.788429	0.548467	0.177517	0	0.532627	0.175192	0.677788	0.775396	0.739922	0.649242	0.741395	0.50413	0	0.654219	0.783001	0.582661	0.552492	0	0.529582	0.49596	0.582252	0.501632	0.854065	0.56233	0.322105	0	0.516974	0.435261	0.609484	0.673376	0.605932	0.43056	0.402449	0.461368	0.28429	0.644046	0.744937	overlap
Nfkbia	0.406821	0.34814	1.10279	0.687225	0.331668	0.504001	0.336639	0.435534	0.798396	0.503788	1.36923	0.400223	0.777465	0.411118	0.513029	0.793593	0.78939	0.922082	0.552636	1.40652	0.663634	0.875955	0.637386	0.543663	0.732589	1.80313	0.396268	0.368645	0.432988	0.741988	0.596885	2.01265	2.0601	0.577957	0.875848	0.502835	0.730549	overlap
Ninj1	0.721984	0.626764	0.281556	0.687225	0.859847	0.316049	0.974315	0.964451	1.05989	0.612612	0.741395	0.863193	0.596747	0.981639	1.01623	1.60784	1.24786	0.32109	1.28691	0.771896	1.19535	1.34796	1.09493	0.609962	0.914543	0	0.79102	0.912877	0.925196	0.943143	0.568717	0.853221	0.635675	0.751736	0.567382	0.833173	0.919349	overlap
Nisch	0.38339	0.654924	0.490823	0.687225	0.641613	0.376725	0.652278	0.672456	0.586051	0.574236	0.68552	0.635345	0.38257	0.617212	0.592522	0.718997	0.761911	0.32109	0.699417	0.62284	0.793131	0.771557	0.764147	0.575357	0.449477	0.352336	0.629485	0.556633	0.621575	0.646331	0.630712	0.565065	0.587833	0.679374	0.566116	0.711668	0.592738	overlap
Nop56	1.8415	1.55642	1.18719	2.06906	1.77694	0.869792	1.55971	1.26898	1.03621	0.863106	0.720752	1.41873	1.44103	0.91121	0.740467	0.784035	0.815306	0	1.19113	0.699466	0.785442	0.640587	1.19484	0.870035	0.950653	1.47684	1.41987	1.34171	0.921015	0.662754	0.917586	1.14513	1.19558	1.40259	0.830954	0.861647	0.668244	overlap
Nrarp	0	0.0197737	0	0	0.0175065	0	0.0117809	0.0367027	0	0.0459716	0	0.0399126	0.227015	0.0161755	0.0863555	0.177906	0.211981	0	0.206582	0.0247581	0.223189	0.242181	0	0.0493261	0	0	0.0277165	0	0.0104942	0.0766882	0.0470901	0.00373172	0.0103303	0.0253539	0.0223659	0.0162487	0.0184218	overlap
Nrros	0.730662	0.596777	0.916485	0.401521	0.689545	0.744644	0.673507	0.550292	0.550379	0.540798	1.389	0.538371	1.55698	0.674692	0.550817	0.377656	0.347389	0.32109	0.364781	0.543633	0.616371	0.267941	0.313188	0.547001	0.593234	0.818528	0.556011	0.773333	0.672012	0.516277	0.681846	0.812415	0.834353	0.678795	0.614529	0.751702	0.641386	overlap
Odc1	0.683968	0.981392	0.59672	1.3774	1.17699	0.75972	0.799964	0.730054	0.651539	0.675918	0.921783	0.914624	1.28979	0.473705	0.585473	1.06774	1.18237	0	1.31549	0.714518	0.765416	0.760418	0.740744	0.700063	0.616785	0.989372	0.952091	0.636071	0.541315	0.530804	0.765366	0.660014	0.831931	0.970759	0.727554	0.569562	0.506464	overlap
Osbpl9	0.462998	0.469446	0.137962	0	0.335188	0.332834	0.367552	0.443388	0.679628	0.48202	0.379251	0.346313	0.394895	0.402415	0.401801	0.550668	0.587598	0	0.48316	0.428223	0.508386	0.670681	0.474985	0.521528	0.343869	0	0.371959	0.153794	0.394433	0.421718	0.502653	0.464828	0.47337	0.380798	0.334112	0.372862	0.485795	overlap
P2rx4	0.466118	0.232492	0.321561	0	0.164592	0.412587	0.220031	0.347431	0.156954	0.287564	0	0.209776	0.227015	0.304036	0.366985	0.502591	0.422585	0.32109	0.297967	0.49667	0.579888	0.496144	0.47982	0.290131	0.214795	0	0.20664	0.344614	0.325376	0.3887	0.32662	0.30196	0.233327	0.212474	0.507353	0.318816	0.415165	overlap
Pan3	0.422605	0.64191	0	0.401521	0.425694	0.305223	0.535937	0.436842	0.648894	0.783762	0.933919	0.604839	0.394895	0.746999	0.49606	0.932225	1.04615	0	0.802923	0.512133	1.03277	0.793317	0.138072	0.853051	0.869142	1.87042	0.618072	0.300688	0.752635	0.493449	0.824887	0.415381	0.536581	0.688679	0.292693	0.718585	0.587413	overlap
Pdcd6	0.852395	0.848819	0.52571	0.687225	0.827278	0.637861	0.835038	0.886466	0.958894	0.94957	0.720752	0.810239	0.99532	0.78021	0.809599	0.998316	1.01698	0	0.937833	0.943315	1.12328	1.10126	0.902195	0.862223	0.672673	0.612356	0.778803	0.819544	0.760127	0.745975	0.875861	0.707929	0.790498	0.791439	0.797436	0.744973	0.78638	overlap
Pde10a	0	0.012629	0	0	0.00709426	0	0.00122857	0.0769043	0.216544	0.0137278	0	0.007056	0	0	0.0906412	0.418247	0.468626	0	0.32921	0.0473393	0.10949	0.645513	0.274098	0.0110702	0	0	0.00843842	0	0.00260199	0.0824899	0.0127385	0.0219785	0.00935743	0.00243331	0	0.0103867	0.0533232	overlap
Pde3b	0.156424	0.0488349	0	0	0.0475804	0	0.0352712	0.0340549	0	0.0980219	0	0.0710783	0	0.0397652	0.0540778	0.249239	0.291239	0	0.219176	0.170688	0.229366	0.246972	0.180734	0.081494	0	0.612356	0.0809817	0	0.0544678	0.0716864	0.11356	0.0392217	0.0755469	0.0879775	0.0576445	0.0657888	0.0833009	overlap
Pde4b	0.673502	0.230462	0.358656	0	0.1922	0.0384008	0.204478	0.323055	0.578198	0.320012	0.720752	0.267633	0.227015	0.326651	0.446164	1.37102	1.35365	0	1.13457	0.617168	1.29025	1.0047	0.556478	0.308265	0.345343	0.818528	0.279335	0.0769661	0.337578	0.496521	0.323568	0.806638	0.571573	0.275196	0.162956	0.341416	0.468958	overlap
Pde4d	0.366816	0.159903	0	0	0.172974	0.115142	0.155631	0.153439	0.214064	0.18796	0.720752	0.197	0.227015	0.235584	0.210264	0.588815	0.54749	0	0.465501	0.370138	0.475731	0.543857	0	0.160534	0.234679	0	0.164072	0	0.211794	0.24302	0.18745	0.147066	0.118496	0.184062	0.554904	0.257351	0.234867	overlap
Per1	0.198301	0.0485089	0	0	0.0394001	0.0838015	0.0520369	0.172195	0.233205	0.0850933	0	0.0619779	0	0.0549875	0.197089	0.630737	0.699844	0.32109	0.575551	0.37481	0.499493	0.769851	0.218979	0.0679772	0.0588521	0	0.0506156	0	0.0680647	0.197826	0.0656844	0.206582	0.147638	0.0684798	0.0430971	0.0871697	0.234264	overlap
Phc2	0.142255	0.317723	0.209267	0	0.306839	0.162464	0.292325	0.277485	0.0901543	0.326905	0	0.312644	0	0.289076	0.261097	0.449986	0.546674	0	0.403345	0.353438	0.35075	0.537102	0.583111	0.341147	0.459913	0.612356	0.265013	0.377735	0.26834	0.322939	0.287439	0.537354	0.499543	0.313971	0.227702	0.289892	0.317579	overlap
Phgdh	1.71126	1.62613	1.18597	1.86176	1.79317	1.28566	1.55973	1.34085	1.58601	1.41662	1.71325	1.69839	0.954509	1.33378	1.2783	1.34587	1.35366	0.758884	1.57027	1.03	1.40572	0.948382	1.2333	1.34908	1.60449	1.87042	1.70799	1.56494	1.3691	1.18807	1.34355	1.2982	1.34297	1.62438	0.995312	1.29232	1.05861	overlap
Pik3ip1	0.434619	0.27781	0	0.401521	0.155671	0	0.355156	0.477195	0.959728	0.541939	1.39856	0.325187	0	0.721223	0.868059	1.12169	1.01097	0.32109	0.742363	0.698451	1.39484	1.25228	0.643111	0.457988	0.591883	0.612356	0.32226	0.331203	0.671609	0.799075	0.56425	0.351638	0.286282	0.330242	0.248695	0.615236	0.845161	overlap
Pim3	0.372787	0.234594	0.280277	0	0.288229	0.196787	0.284223	0.305718	0.321275	0.171137	0	0.19978	0.621911	0.163171	0.247414	0.400026	0.33868	0	0.424434	0.299979	0.408024	0.55288	0.39679	0.137622	0.18202	0.352336	0.190644	0.471562	0.151182	0.291709	0.135045	0.263381	0.221103	0.199965	0.231524	0.124742	0.200634	overlap
Plaur	0	0.0808968	0	0	0.084805	0.123574	0.0728525	0.106316	0.180259	0.0654235	0	0.083016	0	0.0790778	0.128546	1.15211	1.13639	0	0.962175	0.594894	0.968053	1.06996	0	0.0613233	0.104595	0	0.0549421	0.135731	0.0496771	0.0919122	0.0508805	0.0606045	0.0654647	0.0584847	0.0949961	0.0518334	0.0654697	overlap
Plk2	0.146207	0.00275548	0	0	0.00813606	0	0.010589	0.0898549	0	0.0364689	0	0.0158772	0	0.0243723	0.0970741	0.16998	0.1568	0	0.0747325	0.0349839	0.30404	0.238144	0	0.0234715	0	0	0.0131403	0	0.00907462	0.126754	0.0192844	0.0460067	0.033598	0.00637246	0.0278661	0.0248815	0.105743	overlap
Pnp	0.881702	1.52413	1.36708	1.3774	1.45702	1.22739	1.42629	1.29854	1.09994	1.14226	0.964229	1.10243	1.11379	0.959204	0.972069	0.715432	0.877968	0	0.835258	0.960964	0.784292	0.88453	1.51293	1.10871	1.50949	1.47684	1.11321	1.23569	1.03222	1.01951	1.31159	2.05965	1.99317	1.27053	1.46429	1.24304	1.36115	overlap
Por	0.559431	0.536262	0.387749	0.687225	0.514972	0.565408	0.518551	0.62468	0.491472	0.447788	1.39856	0.419741	0.38257	0.384059	0.491787	0.738148	0.599433	0.32109	0.576069	0.351824	0.631238	0.756906	0.369012	0.43705	0.353351	0.352336	0.359834	0.272657	0.45477	0.480662	0.389769	0.408547	0.394296	0.421972	0.349322	0.419228	0.491657	overlap
Pou2f2	0.307358	0.558459	0.52571	0.687225	0.627208	0.295334	0.757284	0.334676	0.164321	0.361695	0.592418	0.516795	0.394895	0.623164	0.411287	0.293168	0.272916	0	0.213224	0.186485	0.257105	0.298925	0.613057	0.430603	0.641836	0.612356	0.5534	0.153794	0.709151	0.402025	0.61911	0.603394	0.71832	0.774783	0.352939	0.789005	0.444753	overlap
Ppp1r13b	0.305187	0.283048	0.178481	0.401521	0.203297	0.206213	0.231208	0.260705	0.116632	0.239966	0	0.156645	0	0.204752	0.260913	0.41343	0.391771	0	0.338059	0.150422	0.275356	0.485189	0.161014	0.257499	0.206342	0	0.180431	0.116523	0.215751	0.280384	0.278938	0.188947	0.200757	0.169051	0.121241	0.222114	0.226952	overlap
Ppp1r18	0.528533	0.414962	0.399941	0	0.373516	0.615395	0.484512	0.336622	0.478083	0.447182	0.379251	0.397868	0.50104	0.538375	0.411507	0.647238	0.651062	0	0.512691	0.5023	0.374693	0.51892	0.430128	0.416207	0.293458	0.352336	0.414046	0.464706	0.520052	0.440214	0.451643	0.458001	0.522882	0.454032	0.516955	0.576643	0.413996	overlap
Ppp2r5a	0.275964	0.482367	0.805987	0.401521	0.404253	0.32732	0.435346	0.390843	0.816245	0.417984	0.341502	0.395821	1.14111	0.487774	0.425833	0.513117	0.585303	0	0.491524	0.663019	0.5606	0.531396	0.318806	0.471708	0.388425	0.612356	0.402136	0.686242	0.440809	0.383956	0.529808	0.398143	0.465586	0.46917	0.610389	0.519305	0.463847	overlap
Prdx6	2.2246	1.60004	1.44818	1.24429	1.82899	1.45318	1.75445	1.90364	2.0198	1.51414	1.62879	1.78145	1.75937	1.61473	1.87832	2.04992	1.76284	0.563756	1.90458	1.81146	1.9551	2.1314	2.11918	1.43633	1.7715	1.56892	1.71689	1.74706	1.58614	1.85451	1.39421	1.67403	1.40529	1.70092	1.55214	1.61564	1.77863	overlap
Prkar1a	1.16328	0.979277	0.467597	1.09071	0.874684	0.603923	0.854697	0.807818	0.918666	0.943628	0.379251	0.821204	0.50104	0.886066	0.848642	1.09066	1.16052	0	1.02248	1.11044	1.00835	1.09337	1.02146	1.01193	0.905463	0.612356	0.857948	0.679605	0.894136	0.874457	0.974134	0.865075	0.974637	0.858761	0.815272	0.878286	0.82955	overlap
Prtn3	1.98481	1.42151	1.30883	1.93574	1.62421	1.36389	1.7276	1.94674	1.34532	1.21617	1.94558	1.28021	2.24772	1.41778	1.50691	1.32498	1.00855	0	1.1953	1.57498	1.36129	1.17217	1.32341	1.21717	1.53814	0.818528	1.26252	3.30566	1.44506	1.51128	1.21237	1.34464	1.06722	1.30801	2.34354	1.43214	1.46703	overlap
Psmb8	1.92973	1.86606	1.91339	1.93574	2.05386	2.28922	1.87539	1.73521	1.80215	1.8629	2.23947	2.05971	1.9245	1.85057	1.69691	1.63044	1.73511	0.563756	1.86509	1.83151	1.68697	1.26214	1.50574	1.84853	2.14272	1.93346	2.07144	1.94735	1.87289	1.68158	1.7636	2.04023	2.00388	1.99178	1.8564	1.83241	1.6136	overlap
Psme1	1.86292	1.73073	1.93312	2.51481	1.87637	1.91135	1.82272	1.71386	1.6304	1.60384	1.71325	1.83788	1.68691	1.66413	1.71716	1.66664	1.60006	0.32109	1.7438	1.67378	1.64919	1.48035	1.87176	1.58947	2.08185	2.04875	1.8774	1.36808	1.76642	1.62235	1.54576	1.85222	1.7877	1.78367	1.54074	1.64735	1.58771	overlap
Ptbp2	0.293493	0.190834	0	0	0.173622	0.25503	0.183884	0.191681	0.12391	0.202276	0	0.157513	0	0.183191	0.20328	0.307478	0.335178	0	0.329672	0.288391	0.468619	0.344044	0	0.192054	0.045743	0.352336	0.186595	0.0768278	0.173346	0.196258	0.208517	0.179964	0.172197	0.186946	0.086779	0.198133	0.172249	overlap
Ptprcap	1.98371	1.60319	1.74349	1.49485	1.66426	0.656589	1.84357	1.88663	2.04076	1.69414	2.00524	1.73977	1.47388	1.91541	1.97735	1.676	1.51582	0.922082	1.53026	1.23941	1.70867	1.63793	1.58801	1.72131	1.97416	1.87042	1.74059	0.813244	1.96668	1.97504	1.60462	1.55709	1.47158	1.63201	1.10164	1.83932	1.81363	overlap
Rab27b	0	0.0282195	0	0	0.0370625	0	0.0134753	0.0545004	0	0.0458237	0	0.063709	0	0.02511	0.121577	0.128572	0.0872032	0	0.133797	0.0669654	0.0300864	0.323413	0.161014	0.0616034	0	0	0.0438196	0	0.0311932	0.0920931	0.0634861	0.0310256	0.0258308	0.0354459	0.0572127	0.0278721	0.118546	overlap
Rab4a	0	0.0488923	0	0	0.0772086	0.0402551	0.0938109	0.103482	0.210111	0.0572142	0	0.129147	0.38257	0.145267	0.156116	0.470188	0.229827	0	0.253133	0.204989	0.198751	0.381509	0	0.0785741	0.149623	0	0.113981	0	0.162001	0.152782	0.0660389	0.127359	0.039057	0.112098	0.032891	0.127157	0.146136	overlap
Rabgef1	0.0709541	0.0665016	0.0783793	0	0.0543157	0.170369	0.0648271	0.0830018	0	0.0446709	0	0.0388678	0	0.0435455	0.0607727	0.132728	0.163054	0	0.116933	0.0412157	0.135453	0.254831	0	0.0585249	0.111444	0.352336	0.0640955	0	0.0510002	0.0663171	0.0680948	0.110311	0.114227	0.0778967	0.0351811	0.0607587	0.0701617	overlap
Rack1	3.73018	3.50473	3.43769	3.6773	3.59323	3.41004	3.66926	3.59753	3.50507	3.44737	3.73542	3.55723	3.19032	3.58158	3.59084	3.46349	3.32678	2.1034	3.41131	3.35485	3.3456	3.38314	3.5223	3.41648	3.53678	3.46054	3.5246	3.46669	3.57622	3.52591	3.36712	3.40051	3.33208	3.47002	3.4666	3.50068	3.44969	overlap
Rad50	0.83308	0.789305	0.387749	0.401521	0.827105	0.388214	0.541553	0.426308	0.847395	0.798987	0	0.880643	1.07194	0.495765	0.530107	0.376497	0.650067	0	0.685142	0.48783	0.342552	0.343763	0.503004	0.819923	0.704502	0.612356	0.791442	0.329002	0.509702	0.408229	0.770212	0.509536	0.704809	0.84491	0.494883	0.529352	0.540475	overlap
Rasa2	0.306091	0.235253	0.465163	0.401521	0.223952	0.0668846	0.193968	0.201128	0.0668688	0.172271	0	0.162325	0	0.169006	0.142589	0.575187	0.602446	0.32109	0.399707	0.295487	0.503473	0.407451	0	0.166746	0.151427	0	0.152895	0.308547	0.161979	0.132721	0.24417	0.162068	0.18398	0.172497	0.145235	0.185482	0.18514	overlap
Rbm38	0.504675	0.56056	0.321561	0.401521	0.582596	0.665276	0.57302	0.695018	0.689106	0.489309	0.379251	0.534773	0.61275	0.516226	0.662298	0.24259	0.319853	0	0.287093	0.312858	0.303319	0.245221	0.785754	0.450228	0.55038	0	0.510947	0.598276	0.520336	0.605501	0.456461	0.292375	0.403826	0.485442	0.516318	0.446844	0.50589	overlap
Retreg1	0.260758	0.414218	0.0783793	0	0.296746	0.211741	0.333852	0.367788	0.808108	0.709689	0.592418	0.46256	0.227015	0.679091	0.573194	0.411599	0.461231	0.32109	0.339424	0.261435	0.178212	0.387528	0.752049	0.722408	0.616181	1.26252	0.495167	0.270317	0.609894	0.780631	0.756539	0.5486	0.64857	0.448676	0.217275	0.638455	0.679065	overlap
Rfc2	0.994418	0.890745	0.715215	1.49485	1.44144	1.27092	0.969078	0.747368	0.795923	1.03733	0.341502	1.56275	1.62615	1.05588	0.711819	0.921581	1.02388	0.32109	1.38175	1.05	0.836002	0.645163	0.855811	1.06364	0.966613	0.612356	1.51758	1.19185	1.02946	0.766943	0.967245	0.931819	0.972156	1.46378	1.11824	0.919209	0.796202	overlap
Rgs1	1.79188	0.448642	0	0	0.380387	0.227135	0.367474	1.60533	2.10662	0.962544	0.592418	0.672945	0.806967	0.753747	2.04009	1.40315	1.13817	0	0.971396	1.35646	1.75026	1.32182	2.17122	0.704584	1.42416	0.352336	0.532838	0.562747	0.805494	1.95782	0.821167	2.50145	1.79505	0.665757	0.628976	1.11235	1.78512	overlap
Rgs2	1.21451	0.300824	0.281556	0	0.26351	1.04565	0.3293	0.912148	1.17865	0.624893	0.720752	0.457677	1.55698	0.542065	1.09219	0.770704	0.80987	0	0.576807	1.01921	0.696587	0.711003	1.21372	0.556225	0.861437	0.352336	0.392943	0.850522	0.534709	1.127	0.571293	0.448003	0.333898	0.418338	0.787739	0.715535	0.869171	overlap
Rnf125	0.033547	0.0732986	0.355998	0	0.0527555	0.162013	0.0463692	0.145364	0.0668688	0.09983	0.379251	0.0740038	0	0.0556799	0.129511	0.555144	0.501047	0	0.430674	0.3919	0.469585	0.745703	0	0.103996	0.0304697	0	0.0707528	0	0.0519005	0.181474	0.0992898	0.0316638	0.0301711	0.0531871	0.0795236	0.041674	0.164209	overlap
Rnf4	0.608038	0.584593	0.703227	0.90918	0.579338	0.648528	0.529571	0.603777	0.720216	0.655184	0.542532	0.528335	0.227015	0.413439	0.642649	0.666004	0.703458	0.32109	0.711506	0.534266	0.647898	0.618506	0.781183	0.524505	0.467625	0.818528	0.526818	0.31897	0.462076	0.567641	0.647119	0.698917	0.694765	0.592601	0.399761	0.536981	0.641025	overlap
Rora	0.0810236	0.0230871	0	0	0.0253401	0.0532417	0.0469187	0.0852429	0	0.090788	0	0.0419469	0	0.13145	0.156606	0.231613	0.200547	0	0.095979	0.23107	0.0992909	0.34542	0.138072	0.0761626	0.0588521	0	0.0587586	0	0.135379	0.217733	0.0885584	0.0766026	0.0450908	0.0462148	0.0329451	0.113885	0.282736	overlap
Rpl35	1.96283	1.96023	1.73808	2.00462	2.00385	2.06122	2.05277	2.03862	2.48063	2.00773	2.03877	2.1214	2.04229	2.10181	2.10422	2.58043	2.45255	1.48335	2.5465	2.52881	2.58822	2.5036	2.25394	2.09761	2.07549	2.04875	2.19675	2.24453	2.20855	2.12842	2.18896	2.11931	2.10453	2.23538	2.23378	2.21418	2.21438	overlap
Rpl36al	0.933031	0.903538	0.900803	1.59995	0.965248	0.817105	0.960793	0.899226	0.749055	0.848401	0.921783	0.973003	1.11379	0.923464	0.720184	0.490701	0.555787	0.563756	0.579594	0.815549	0.467777	0.48159	0.592492	0.797614	0.618459	0.612356	0.973995	1.40513	0.838991	0.754106	0.813952	0.811661	0.811399	0.943406	1.2223	0.851916	0.743466	overlap
Rpl38	2.03976	2.08682	2.02232	2.24067	2.11903	1.91937	2.28346	2.33651	2.20075	2.12183	2.5683	2.22203	1.82708	2.35471	2.40892	2.59646	2.37807	1.39353	2.41707	2.5777	2.58446	2.67914	2.37609	2.21756	2.36793	1.99277	2.32601	2.28008	2.46956	2.46549	2.23698	2.35282	2.15338	2.33709	2.41926	2.47562	2.60537	overlap
Rpl8	3.73627	3.64825	3.44513	3.59936	3.6635	3.62284	3.71386	3.70168	3.64182	3.64283	3.66525	3.6449	3.39296	3.71403	3.66219	3.60352	3.52514	2.45115	3.5696	3.67168	3.51296	3.54082	3.7783	3.59145	3.58374	3.44718	3.64041	3.62929	3.6551	3.61139	3.50743	3.47098	3.46892	3.54723	3.63601	3.57905	3.53801	overlap
Rps18	3.7665	3.58328	3.40863	3.58576	3.59408	3.40342	3.73926	3.73125	3.8764	3.73077	3.96277	3.72573	3.45153	3.88518	3.87533	3.61745	3.50119	2.19179	3.4914	3.43946	3.58857	3.60786	3.97036	3.71652	3.8241	3.49957	3.7292	3.56931	3.90359	3.87302	3.60028	3.65214	3.55194	3.65094	3.60445	3.77542	3.73955	overlap
Rps27	2.42984	2.08551	2.03496	1.69504	2.08069	2.04047	2.30657	2.46792	2.62825	2.24413	2.61567	2.22652	2.4235	2.5688	2.62661	2.83814	2.59158	1.84068	2.52781	2.67332	2.69709	3.03077	2.86133	2.35674	2.5663	2.48341	2.34381	2.34419	2.62974	2.72466	2.36115	2.48715	2.27912	2.30762	2.46101	2.60969	2.79441	overlap
Rps28	1.75954	1.8534	1.70656	2.06906	1.854	1.85951	1.96987	1.99882	1.93219	1.95561	2.21742	1.97441	2.07511	2.14153	2.19837	1.90551	1.75636	1.06235	1.82076	1.83569	1.9896	1.99886	2.18319	1.98172	1.93886	2.20004	2.0308	2.02658	2.20674	2.21776	2.04009	2.06866	1.9359	2.03462	2.24503	2.20077	2.33157	overlap
Rsrp1	1.1459	1.29622	1.44104	0.687225	1.05414	1.20358	1.32938	1.37217	1.14513	1.43839	2.03877	1.28281	1.35896	1.65162	1.40407	0.815233	0.784261	0	0.629963	0.865489	1.07571	0.8559	0.996318	1.56897	1.61522	1.87042	1.37905	1.56922	1.73307	1.53247	1.47527	1.18607	1.20907	1.25797	1.60153	1.6761	1.49377	overlap
Runx2	0.882452	0.501373	0.321561	0.401521	0.43857	0.226022	0.580214	0.486369	0.634794	0.527612	0	0.416309	0	0.630778	0.445925	0.92361	0.870542	0	0.704141	0.409955	0.98845	0.661057	0.41217	0.540497	0.237655	0.818528	0.441083	0.358527	0.508087	0.476143	0.632879	0.327351	0.392199	0.508744	0.0881593	0.618545	0.563267	overlap
Samsn1	0.407141	0.720165	0.489544	0.90918	0.565667	0.291429	0.74408	0.62401	0.847544	0.81415	0.933919	0.598248	0	0.787715	0.671008	0.886099	0.879526	0	0.787186	0.808585	1.07232	0.707905	0.723974	0.859311	0.679246	0.989372	0.674555	0.476916	0.86482	0.699509	1.00791	1.6766	1.36707	0.766376	0.49264	0.97145	0.960748	overlap
Selplg	0.551057	0.705031	0.758707	0.401521	0.709147	1.48106	0.6697	0.434989	0.601853	0.803025	0.720752	0.772489	2.21959	0.719972	0.554564	1.24261	1.47368	0.563756	1.19657	1.12381	1.2038	0.746123	0.563015	0.796498	0.584546	0.352336	0.797978	1.13752	0.786983	0.647956	0.783186	0.66148	0.782763	0.833205	0.74575	0.762944	0.525497	overlap
Serpina3g	1.38766	1.38135	1.70312	1.09071	1.38916	0.932279	1.38954	1.5063	0.357928	0.670752	2.16609	0.615265	0.50104	0.611795	1.09927	0.493451	0.3938	0.32109	0.499616	0.198037	0.579459	0.976737	0.518159	0.664859	2.16684	0	0.614603	0.223211	0.664567	1.01837	1.23148	3.95849	3.2602	1.21324	0.957014	1.28192	2.04021	overlap
Sik1	0.243688	0.0844489	0.0783793	0	0.0833732	0.0916425	0.117511	0.351426	0.220058	0.121928	0	0.116337	0	0.1117	0.458219	0.504948	0.466349	0.32109	0.372706	0.315948	0.391176	0.695471	0.531305	0.112278	0.186311	0	0.0934153	0	0.0976826	0.471638	0.085535	0.224181	0.118838	0.102209	0.110574	0.175969	0.450149	overlap
Sipa1l1	0.179934	0.265526	0	0.687225	0.183396	0.246153	0.192943	0.156206	0.120145	0.232544	0	0.182245	0.227015	0.198558	0.188906	0.462446	0.502739	0	0.470547	0.50954	0.473007	0.382976	0.133236	0.242336	0.0468307	0.352336	0.201504	0.0959884	0.17113	0.193388	0.277525	0.366697	0.323737	0.242653	0.500339	0.241843	0.230659	overlap
Sirt3	0.856606	1.00372	0.899916	1.24429	0.802829	0.339089	0.890557	0.792211	0.594282	1.14579	1.43708	0.927204	0.991642	1.16044	0.99701	0.866712	0.941211	0.32109	0.772772	0.496852	0.772945	0.665369	0.549746	1.1315	1.00882	1.26252	0.922388	0.472617	1.14476	1.02384	1.1523	0.866834	1.01669	0.917791	0.504201	1.13243	1.00437	overlap
Skil	0.0709541	0.094741	0.0783793	0	0.095018	0	0.0807054	0.495911	0.217597	0.143925	0	0.0888772	0.227015	0.074147	0.413407	0.407281	0.329603	0.32109	0.240934	0.149879	0.265905	0.65822	0.31397	0.14081	0.0893218	0.612356	0.10088	0.272518	0.0567621	0.493008	0.0977164	0.469188	0.31336	0.119948	0.0635238	0.117106	0.375321	overlap
Sla2	0.129577	0.108643	0.209267	0	0.137182	0	0.168309	0.140968	0.34456	0.0902946	0	0.085479	0	0.128534	0.193024	0.490961	0.369474	0	0.298333	0.107845	0.333646	0.545035	0	0.0751095	0.046869	0	0.0802636	0	0.14435	0.18743	0.114285	0.09406	0.0580906	0.0976272	0	0.156418	0.156334	overlap
Slc38a1	1.04805	0.927463	0.797404	1.3774	0.919455	0.623407	0.915188	0.916619	1.11858	0.812759	0.68552	0.85384	0.677045	0.824855	0.858406	1.13276	1.1145	0	1.07908	0.837161	0.967083	1.08429	0.895474	0.825261	0.750195	1.73099	0.811917	0.848735	0.782334	0.860764	0.832403	0.579984	0.650354	0.840813	0.607333	0.788159	0.737256	overlap
Slc3a2	0.590761	0.885149	1.18654	0.687225	0.806815	0.849793	0.792964	0.937106	0.411784	0.713691	0.720752	0.770949	0.50104	0.574721	0.886169	1.03159	1.06506	1.84068	1.04614	1.05372	0.982703	1.1532	1.06866	0.637674	0.778611	0.612356	0.736086	0.937797	0.585988	0.799146	0.623163	0.661317	0.654018	0.699905	0.795743	0.568949	0.693614	overlap
Smim3	0.138507	0.177624	0	0.401521	0.205759	0.224022	0.247502	0.309232	0.526439	0.150447	0.720752	0.193855	0.596747	0.27214	0.266073	0.80031	0.637612	0	0.612795	0.591632	0.423508	0.628164	0.249045	0.214287	0.412616	0	0.210741	0.332692	0.286441	0.304766	0.213295	0.324724	0.257986	0.207642	0.192248	0.290489	0.301007	overlap
Snap23	0.265935	0.292466	0.281556	0.687225	0.296438	0.250925	0.397726	0.581348	0.208581	0.220664	0	0.21097	0	0.302942	0.399811	0.346149	0.238793	0	0.234715	0.289568	0.37144	0.69537	0.567851	0.206823	0.340552	0.352336	0.184549	0.468205	0.297747	0.344815	0.214664	0.430527	0.266099	0.175913	0.402309	0.236907	0.366163	overlap
Snrk	0.108506	0.153125	0.0783793	0	0.112767	0	0.107828	0.119843	0.0570411	0.200365	0	0.119378	0	0.14922	0.131049	0.253191	0.22844	0.32109	0.165436	0.192642	0.185282	0.368166	0.44504	0.168667	0.120812	0.352336	0.124389	0.0768278	0.138896	0.148184	0.225946	0.133289	0.160269	0.143721	0.0338992	0.161177	0.193147	overlap
Snrpc	0.6614	0.939478	0.7711	1.49485	0.960031	0.848809	0.719744	0.915819	1.27017	0.95975	0.592418	0.929446	0.777465	0.716334	1.0604	0.777589	1.01661	0.758884	0.952378	0.728796	0.588862	0.774876	1.05306	0.967033	1.04024	0.989372	0.900722	1.27836	0.65384	0.976593	0.935708	0.749021	0.915905	0.907862	0.855034	0.70232	0.773613	overlap
Snrpg	0.747149	0.668979	0	1.09071	0.662897	0.444332	0.537313	0.500186	0.575166	0.75876	0.592418	0.757066	0.991	0.546448	0.522999	0.747449	0.996184	0.32109	0.996574	0.920697	0.759877	0.633162	0.647446	0.806875	0.578209	1.13524	0.797285	0.881214	0.581284	0.547285	0.763418	0.603017	0.754583	0.830783	0.758254	0.637368	0.554123	overlap
Socs3	0.381293	0.178205	0.209267	0.401521	0.255162	0.223802	0.44231	0.321243	0.465559	0.0598098	0	0.0597538	0	0.0813157	0.288782	0.53347	0.344783	0	0.31423	0.235968	0.470328	0.472014	0.452042	0.0475201	0.290206	0	0.0648824	0.0769661	0.0674065	0.31978	0.328637	1.39206	1.10228	0.357664	0.169239	0.44598	0.566782	overlap
Sox4	1.98852	1.86875	1.53933	0.687225	1.58359	0.836658	1.97094	1.72595	1.7844	1.91024	1.82431	1.59634	1.10111	2.17991	1.69854	1.51159	1.66474	0	1.27171	1.1265	1.771	0.991508	1.72503	1.80987	1.87837	1.99277	1.59869	1.15831	2.10048	1.68817	1.8313	1.43085	1.57131	1.54635	0.697324	1.9632	1.58583	overlap
Spns2	0.881052	0.487081	0.355998	0.90918	0.432363	0.293764	0.410186	0.540106	0.308563	0.644153	0.933919	0.498569	0.50104	0.571759	0.695207	0.720912	0.713511	0	0.693898	0.321778	0.587206	0.81063	0.294251	0.591293	0.3985	0	0.519876	0	0.560877	0.741386	0.68332	0.459843	0.452956	0.523072	0.174658	0.573886	0.701977	overlap
Srgn	2.68637	2.35423	1.9671	2.5917	2.26509	1.78189	2.29145	2.50095	2.84367	2.57865	2.77829	2.46743	2.70285	2.4857	2.69729	2.87529	2.72679	1.18533	2.67471	3.09242	2.77725	2.81455	2.88902	2.53859	2.5914	1.93346	2.41451	2.84203	2.51497	2.68943	2.49841	2.54155	2.40875	2.36333	3.1374	2.44552	2.51936	overlap
Srrm1	0.829367	1.13374	0.701555	1.86176	1.25651	1.1203	1.1184	1.03908	0.614422	0.953533	1.17583	1.12948	0.839766	0.89542	0.926762	1.07795	1.12171	0.758884	1.28161	1.01426	0.99395	1.11077	0.85721	0.933398	0.960122	1.26252	1.05979	0.930206	0.874669	0.840102	0.966973	1.00838	1.04998	1.14467	0.843884	0.879048	0.941542	overlap
Srsf5	2.22372	1.48902	1.40714	1.09071	1.46482	1.43685	1.66367	1.93214	1.62684	1.38681	1.63473	1.43426	1.35896	1.50756	1.85571	2.00413	1.89123	0	1.76613	1.76616	1.94585	2.18605	1.94028	1.34667	1.78645	1.56892	1.36019	1.41711	1.4869	1.89335	1.42252	1.75363	1.51531	1.40027	1.39595	1.52576	1.75868	overlap
St7	0.162888	0.184322	0	0.90918	0.235953	0.215216	0.192972	0.152808	0.0570411	0.18956	0	0.228401	0	0.17895	0.225672	0.430881	0.362814	0	0.370918	0.141277	0.485225	0.5661	0.493077	0.195488	0.206756	0	0.212358	0.242142	0.231443	0.256054	0.159879	0.246949	0.229923	0.213805	0.120125	0.190727	0.279096	overlap
St8sia4	0.255954	0.307832	0.209267	0	0.267334	0.671987	0.319888	0.275333	0.390159	0.465472	0	0.400065	1.14655	0.579596	0.383633	0.661355	0.621536	0	0.424515	0.486317	0.776381	0.638929	0.47982	0.545665	0.515725	0.989372	0.422099	0.270317	0.627433	0.430887	0.543925	0.471922	0.400412	0.430696	0.445152	0.602398	0.385052	overlap
Stap1	0.167129	0.58149	0.562159	0	0.450476	0.402325	0.500245	0.582571	0.555448	0.849489	0.921783	0.641153	0.227015	0.844951	0.884759	0.596392	0.583453	0	0.504459	0.385327	0.886014	0.607918	0.799896	0.826149	0.6191	0.989372	0.674048	0.718879	0.805396	0.836852	0.808262	0.685306	0.702331	0.644947	0.531323	0.792741	0.853116	overlap
Stat4	0.211314	0.166866	0	0	0.120258	0.0384008	0.15368	0.210411	0.0668688	0.256656	0	0.188649	0	0.23651	0.293355	0.578427	0.553119	0	0.374276	0.258166	0.541715	0.683133	0	0.242511	0.173497	0.818528	0.17616	0	0.280521	0.309699	0.272719	0.276614	0.269368	0.206821	0.079536	0.287532	0.402187	overlap
Stk17b	0.565796	0.348014	0	0	0.185526	0.209954	0.237245	0.362426	0.864611	0.439968	0	0.23629	0.227015	0.292741	0.469423	1.24868	1.10338	0	0.898451	0.809507	1.29083	1.021	0.946013	0.423154	0.40032	0.612356	0.235724	0.195691	0.308003	0.509419	0.455116	0.371295	0.388443	0.293955	0.197434	0.324328	0.499189	overlap
Stxbp5	0.260458	0.244779	0.0783793	0	0.205225	0.112285	0.192098	0.253679	0.309225	0.283544	0.720752	0.190649	0	0.215443	0.27147	0.451268	0.406892	0	0.382249	0.235439	0.32376	0.512365	0.212499	0.220948	0.287153	0.352336	0.213796	0.116523	0.184254	0.278745	0.323489	0.361642	0.327906	0.229423	0.34037	0.236956	0.335996	overlap
Sult1a1	0	0.00823455	0	0	0.00597751	0.167541	0.0103582	0.149552	0	0.00909071	0	0.00348257	0	0.00542751	0.147286	0.0890207	0.0250219	0	0.0432753	0.0928982	0.0759029	0.619743	0.133236	0.00526353	0.0588521	0	0.011461	0	0.00634818	0.110798	0.0155316	0.0922723	0.0177518	0.0209653	0.142188	0.0159989	0.236373	overlap
Swap70	0.381723	0.254012	0.178481	0	0.256319	0.34654	0.241867	0.303381	0.39373	0.348386	0	0.314655	0.38257	0.329274	0.343347	0.460654	0.376748	0	0.333405	0.431319	0.341813	0.60987	0.469594	0.34234	0.0396713	0.818528	0.315101	0.358665	0.335169	0.39281	0.295432	0.306827	0.259896	0.313943	0.393113	0.363555	0.411705	overlap
Taldo1	1.20929	1.03629	1.13528	1.69504	1.33651	2.0368	1.38833	1.1738	1.01671	1.0923	1.47982	1.34817	2.35189	1.41935	1.29604	1.3328	1.01374	0	1.26863	2.04405	1.18811	0.969686	1.60076	1.08937	1.37892	1.47684	1.37764	1.80876	1.47455	1.25802	1.06536	1.2186	1.0234	1.33678	2.13128	1.40729	1.12232	overlap
Tgfb1	0.905067	1.22324	1.13084	1.69504	1.31717	1.26672	1.11383	0.821188	0.859966	1.12918	0.933919	1.28259	1.74107	1.11365	0.854618	1.4475	1.52812	0	1.60099	1.44659	1.18442	0.883219	1.0253	1.13838	1.05948	0.989372	1.27858	1.29283	1.10666	0.864662	1.12107	1.154	1.3722	1.26636	1.2254	1.0641	0.712937	overlap
Tgm2	0.177119	0.133958	0	0.401521	0.160684	0.0532417	0.163632	0.552702	0	0.0326982	0	0.0579177	0	0.0306015	0.214514	0.114244	0.0622007	0	0.11527	0.0995237	0.0775859	0.467385	0.284025	0.0180393	0.0470226	0	0.0362195	0	0.0263014	0.153538	0.0623841	0.391405	0.159495	0.0532773	0	0.0376266	0.339011	overlap
Timm13	0.936486	1.09033	1.35047	1.3774	1.28389	0.90417	1.18864	0.989488	0.554101	0.907612	1.06477	1.16298	1.68691	0.879628	0.801624	0.724819	0.774477	0	0.971575	0.981701	0.690926	0.527827	0.488092	0.889434	0.791578	1.13524	1.13535	1.15752	0.853789	0.762229	0.893713	0.799614	0.899363	1.13049	1.10756	0.787342	0.682647	overlap
Tipin	0.754815	0.767237	0.707217	1.86176	1.28597	0.956558	0.698228	0.389112	0.639116	0.630687	0.720752	1.21051	1.5102	0.422624	0.300133	0.538334	0.857063	0	1.38236	0.906926	0.50335	0.264099	0.963318	0.705241	0.674408	1.13524	1.28023	0.846573	0.440016	0.296425	0.722153	0.572747	0.811155	1.28223	0.973687	0.426157	0.263997	overlap
Tmed5	1.21086	0.916769	0.609753	1.24429	0.800313	0.778045	0.803889	0.913855	1.19366	0.668571	0.921783	0.643979	1.35657	0.65583	0.785904	1.0479	1.03577	0	0.962493	1.0265	0.816689	1.0007	1.15981	0.669377	0.625479	0.818528	0.675758	0.898575	0.631065	0.808442	0.751471	1.05426	1.02921	0.700697	0.725166	0.774214	0.857671	overlap
Tmem158	0.148525	0.121776	0	0	0.296935	0.122983	0.42437	0.29665	0.0668688	0.0515436	0	0.123922	0	0.183857	0.155489	0.341821	0.0757804	0	0.210371	0.0582495	0.131569	0.451612	0.294251	0.0358765	0.036373	0	0.125362	0.0768278	0.156308	0.1416	0.0778397	0.225921	0.0703364	0.14149	0.032891	0.224009	0.292658	overlap
Tmod3	0.525505	0.511442	0.490823	1.09071	0.447864	0.417174	0.429144	0.549107	0.268113	0.501091	0.379251	0.447368	1.11379	0.420537	0.402935	0.418507	0.516601	0	0.431269	0.452645	0.486512	0.693527	0.407186	0.488343	0.408728	0.352336	0.385986	0.368645	0.356862	0.414101	0.504826	0.562896	0.518958	0.422391	0.358876	0.413897	0.489098	overlap
Tmsb10	1.54645	1.62518	1.44329	1.59995	1.69167	2.68019	1.7341	1.19244	1.84279	1.67454	1.89216	1.71727	3.06987	1.78875	1.23819	1.97419	1.9797	0.758884	1.92962	2.21836	1.93288	1.31732	1.47486	1.7623	1.82475	2.24577	1.83999	1.92307	1.84203	1.33555	1.72838	1.6641	1.68563	1.86584	1.75511	1.84132	1.37275	overlap
Tnrc18	0.265092	0.228068	0	0.401521	0.187335	0.416765	0.167841	0.196172	0.283413	0.273374	0	0.221031	0	0.23901	0.152174	0.542219	0.57612	0.32109	0.465338	0.313026	0.436434	0.425096	0	0.294199	0.131982	0.612356	0.215065	0	0.237903	0.182784	0.337406	0.178574	0.277492	0.273118	0.149349	0.297807	0.218424	overlap
Tns1	0	0.22121	0.177517	0.401521	0.169245	0.0454007	0.192647	0.155563	0.193515	0.210899	0.720752	0.168595	0.227015	0.239238	0.226433	0.329633	0.310417	0	0.218442	0.129045	0.380612	0.511335	0.133236	0.222401	0.31235	0	0.179129	0.212511	0.243579	0.255506	0.305616	0.304147	0.311305	0.279097	0.112869	0.33993	0.356404	overlap
Tpst2	0.646411	0.476528	0.466128	0.401521	0.519798	0.417097	0.490873	0.49766	0.802785	0.427096	0	0.414294	0.227015	0.508942	0.512234	0.630534	0.502484	0.32109	0.587744	0.309649	0.589366	0.702537	0.537906	0.420588	0.663329	0.352336	0.432587	0.676201	0.510459	0.534956	0.459682	0.548253	0.529857	0.425049	0.449876	0.484945	0.666568	overlap
Trim47	0.114571	0.101005	0	0	0.11006	0	0.0995543	0.280731	0	0.0978456	0	0.113614	0	0.111937	0.323537	0.0571276	0.0426544	0	0.0694727	0.0272658	0.0321699	0.14615	0.212499	0.112732	0.0865402	0	0.109934	0	0.0873545	0.351487	0.099246	0.0452913	0.0330556	0.0833909	0	0.0667388	0.308029	overlap
Trim6	0	0.0537215	0	0	0.0344749	0	0.0366953	0.0801492	0	0.0748121	0.341502	0.0407962	0	0.0506582	0.087142	0.204717	0.255207	0	0.155615	0.0524192	0.138773	0.210452	0	0.0762026	0.0588521	0.352336	0.0290728	0	0.0425878	0.0669192	0.0841507	0.0632594	0.0689322	0.0540647	0	0.0567676	0.0886749	overlap
Trir	0.968917	1.29432	0.633432	0.90918	1.15069	1.10171	1.05722	1.05373	1.0345	1.27551	1.0829	1.18991	1.47669	1.00743	0.978324	0.851712	1.12017	0.32109	1.05543	0.926287	0.832077	0.780084	0.985867	1.28538	0.407447	0.989372	1.12668	1.08821	1.00411	0.947826	1.16041	1.01583	1.21173	1.05599	0.922464	0.911883	0.895601	overlap
Trp53	1.15897	1.29596	1.01951	1.24429	1.38691	0.637664	1.25349	1.09131	1.2178	1.2755	1.42692	1.38635	0.806967	1.20355	1.03395	0.947629	1.0347	0	1.21205	0.766952	1.00663	0.82714	0.743281	1.22572	1.00799	0.989372	1.4271	0.979662	1.17572	0.985658	1.24491	1.28466	1.46043	1.36024	0.952769	1.14061	0.9875	overlap
Tsc22d1	1.08996	1.03946	0.881434	0	0.724138	0.217352	0.882638	1.38647	1.08779	1.02818	0.921783	0.75	0.227015	1.0447	1.3854	1.62301	1.50814	0	0.982492	0.416744	1.66363	2.25691	1.34845	0.975674	1.11737	1.73099	0.679626	0	1.09295	1.39759	1.07086	1.0772	1.09086	0.748672	0.222968	1.18276	1.34824	overlap
Tsc22d3	0.5752	0.32633	0.833149	0.401521	0.238823	0.181264	0.309033	0.558061	0.693661	0.708047	1.43708	0.485955	0.227015	0.667876	1.07562	1.95058	1.84368	0.32109	1.52418	1.1697	1.91193	2.5038	0.815988	0.634235	0.863709	0	0.380479	0.193489	0.616381	0.962382	0.718343	0.41536	0.386652	0.453986	0.236266	0.754113	1.12801	overlap
Tspan32	0.595307	0.751806	0.987515	0.401521	0.74769	0.252688	0.788475	0.787654	0.959463	1.02251	1.27794	0.964931	0.596747	1.1974	1.12519	0.845351	0.791462	0.563756	0.74881	0.607231	0.758512	0.822479	1.00216	1.06852	0.997624	0.612356	0.925666	0.732064	1.17865	1.07402	0.959274	0.607594	0.602814	0.855727	0.676989	1.06608	1.06307	overlap
Txndc11	0.201511	0.206678	0.761095	0	0.275971	0.169716	0.25209	0.29426	0.0668688	0.144083	0	0.159242	0	0.123688	0.156205	0.405995	0.318316	0.922082	0.361367	0.376467	0.288224	0.490354	0.133236	0.155178	0.315736	0.352336	0.144634	0.260106	0.158612	0.179184	0.0964353	0.148796	0.116958	0.159057	0.210843	0.156219	0.165089	overlap
Txnip	1.01394	0.886782	0.741079	0	0.679821	0.665653	0.96407	1.31629	1.233	1.19653	1.84083	0.917489	1.10111	1.55803	1.69605	1.77499	1.58039	0	1.37822	1.31543	1.87183	2.11667	1.38453	1.16266	1.42949	0.818528	0.898071	0.679305	1.56129	1.69235	1.02929	0.820491	0.7891	0.807533	0.616047	1.46801	1.76695	overlap
Txnrd1	0.747518	0.797897	0.287646	0.687225	0.726924	0.34954	0.590252	0.611542	0.192626	0.456914	0.379251	0.47796	0	0.467937	0.458275	0.588633	0.545117	0	0.631793	0.368754	0.514134	0.639095	0.470736	0.458212	0.456177	0.818528	0.49454	0.483755	0.433876	0.403321	0.523235	0.849164	0.782015	0.559595	0.408864	0.475062	0.468597	overlap
Uba52	0.379229	0.396294	0.0783793	0.401521	0.42497	0.532603	0.397048	0.373905	0.380233	0.556872	1.49174	0.466239	1.2095	0.553983	0.519469	1.05811	1.07225	0.563756	1.0609	1.02077	0.961172	0.931378	0.432323	0.470604	0.562612	0	0.48182	0.479413	0.504771	0.503073	0.463666	0.492921	0.490047	0.520751	0.419019	0.509004	0.515169	overlap
Ubc	1.73473	1.65722	1.73001	0.90918	1.3158	1.89304	1.23286	1.69233	2.18474	1.91274	1.71325	1.57122	1.9885	1.63458	1.98773	2.02983	2.12258	2.05609	1.77832	2.09021	1.84966	2.02478	1.69979	1.96745	1.75502	2.04875	1.58478	1.27972	1.56889	2.12825	1.79886	1.61475	1.72933	1.49508	1.51975	1.46132	1.84206	overlap
Ubl3	0.157043	0.310203	0.677559	0	0.237658	0.277211	0.324912	0.392427	0.400243	0.338896	0.379251	0.213758	0.61275	0.335824	0.404246	0.543129	0.55499	0.32109	0.337658	0.388921	0.452207	0.630427	0.180734	0.340165	0.396601	0.818528	0.236943	0.31897	0.311018	0.392321	0.393618	0.470126	0.447104	0.268095	0.263052	0.41152	0.43903	overlap
Ucp2	1.42049	1.0009	0.976707	0.687225	1.21123	1.68922	1.20544	0.940539	0.919349	1.21402	1.53797	1.41876	1.57095	1.468	1.26804	1.95919	1.57839	1.18533	1.6869	1.56694	1.78648	1.6888	1.49854	1.33659	1.44098	1.37541	1.4466	1.0694	1.52974	1.21661	1.13535	1.19218	1.15626	1.36406	1.09134	1.43217	1.11943	overlap
Upp1	0	0.0301633	0.178481	0	0.0215274	0	0.0521682	0.207147	0.120145	0.027555	0	0.0123443	0.227015	0.0538319	0.242799	0.274218	0.146675	0	0.0716443	0.0188976	0.109536	0.570878	0	0.0326129	0	0	0.0106124	0	0.0623997	0.23708	0.0353064	0.126288	0.0404827	0.00861079	0	0.0764089	0.282125	overlap
Vamp2	0.275964	0.155197	0.256861	0	0.113452	0.178395	0.168958	0.216442	0.190067	0.18652	0	0.151294	0	0.180941	0.273421	0.354908	0.420177	0.32109	0.290917	0.277945	0.385647	0.429762	0	0.212366	0.314227	0.352336	0.154468	0	0.220248	0.234274	0.196571	0.154305	0.154335	0.185984	0.193901	0.185769	0.216602	overlap
Vamp5	1.13909	1.08518	0.490823	0.401521	1.05623	0.512241	0.948819	1.37731	1.42053	0.993806	1.28393	1.05056	0.38257	0.889467	1.19746	0.671444	0.699349	0	0.770925	0.502712	0.679076	0.909321	1.03237	0.97636	0.936655	0.352336	0.964436	0.477054	0.8348	1.16145	0.94936	0.832691	0.720269	0.879896	0.559347	0.848953	1.20757	overlap
Vapa	1.11377	1.20915	0.699795	0.401521	1.20643	1.40271	1.22302	1.13334	0.795168	1.0357	0.592418	1.00412	0.991642	0.95914	0.819658	1.14945	1.11416	0.758884	1.09166	1.18743	0.987784	1.06025	0.602831	1.01049	1.28738	1.13524	1.05342	1.28057	0.985886	0.908394	0.994868	1.07197	1.05093	1.04661	1.30223	0.982333	0.946853	overlap
Vdac3	1.37224	1.21343	0.806301	1.59995	1.34053	1.19262	1.11551	1.01445	1.25788	1.19229	1.17583	1.32337	1.62615	0.958486	0.894482	0.91111	1.08529	0	1.25602	0.989545	0.948076	0.567749	1.09703	1.15902	1.34672	1.26252	1.30103	1.39234	1.00333	0.933704	1.09101	0.983153	1.0686	1.24337	1.03324	0.886216	0.853382	overlap
Wnk1	0.926667	0.847701	0.875221	0	0.716705	0.920883	0.808976	0.78374	0.490598	0.866067	0	0.757442	0.227015	0.833531	0.728637	1.06208	1.10123	0	0.881336	0.788256	1.01765	1.02498	0.817044	0.928496	0.854305	1.37541	0.705814	0.611687	0.798109	0.804802	1.01857	1.07467	1.09797	0.837651	0.669055	0.887272	0.915863	overlap
Ywhaz	1.23889	1.16396	1.23009	0.90918	1.12247	1.21118	1.08915	1.2152	0.866929	1.11418	0.68552	1.01714	0.991	0.984089	1.12646	1.24026	1.26023	0.563756	1.29234	1.30721	1.19221	1.19744	0.873658	1.03867	1.0149	0.818528	1.00559	0.938378	1.01208	1.11622	1.18906	1.1856	1.17384	1.16119	1.1628	1.07448	1.1499	overlap
Zbtb20	0.608	0.780338	0.395309	0.401521	0.474735	0.378226	0.722099	0.921601	0.69614	0.885634	0.741395	0.616666	0.227015	0.828405	1.06824	1.11543	1.08621	0.922082	0.804314	0.463424	1.12742	1.34306	0.161014	0.862052	0.743445	0	0.571758	0.379469	0.817102	1.0184	0.982084	0.894246	0.884698	0.618915	0.414371	0.950656	1.20357	overlap
Zfand5	0.99921	0.811002	0.71425	0.687225	0.741075	0.772586	0.954881	0.972379	0.951164	0.76832	1.17583	0.756611	0.227015	0.949489	0.99381	0.70517	0.69833	0.563756	0.631308	0.558222	0.739729	0.804107	0.751407	0.801857	0.772947	1.26252	0.703094	0.976851	0.969363	1.00663	0.862019	1.0557	0.949641	0.799887	0.683958	1.10236	1.11158	overlap
Zfp608	0.657269	0.504115	0.177517	0.401521	0.383744	0.0454007	0.542823	0.64976	0.256037	0.615135	0.379251	0.46869	0	0.63192	0.598348	0.318771	0.351831	0	0.255103	0.202601	0.44522	0.332149	0.530782	0.615495	0.710966	0.352336	0.475385	0.408169	0.600911	0.643005	0.614187	0.392668	0.364344	0.474843	0.196412	0.650348	0.724001	overlap
Zyx	0.844164	0.719022	0.562159	0.687225	0.541148	0.874121	0.687034	0.641766	0.829656	0.854503	0.720752	0.692795	1.44103	0.941747	0.759054	1.12508	1.13568	0	0.910596	0.796091	1.12629	0.856256	0.835441	0.924534	0.673552	0.352336	0.710979	0.42158	0.944284	0.890055	0.941735	0.67901	0.818896	0.722837	0.606835	0.980431	0.785396	overlap
mt-Co1	4.24802	4.19866	3.99911	3.79505	4.08327	4.04444	4.32293	4.36941	4.47108	4.39615	4.5525	4.28203	4.53033	4.58243	4.57265	4.72045	4.56687	3.19765	4.42193	4.46958	4.69287	4.76574	4.57776	4.4585	4.5831	4.23417	4.35286	4.09998	4.65279	4.65561	4.49931	4.42973	4.34084	4.38305	4.28126	4.64591	4.6734	overlap
mt-Nd1	2.85657	2.69815	2.36525	2.66309	2.83801	2.8287	2.59814	2.63968	2.89711	2.81316	2.17696	2.93245	2.44866	2.66397	2.74866	3.21723	3.2034	2.38365	3.41587	3.32487	2.92743	3.07784	3.2767	2.8601	2.67972	3.01699	2.99107	3.01899	2.70164	2.7784	2.96697	2.89864	2.91669	3.15179	2.98676	2.87338	2.97587	overlap
mt-Nd2	2.82746	2.71453	2.4971	2.5917	2.82102	2.73253	2.80704	2.78581	3.10273	2.90843	3.08448	2.98084	2.52856	2.94722	3.04809	3.31518	3.12596	1.89904	3.28012	3.16084	3.15567	3.27533	3.37153	2.95839	2.81312	2.86066	3.04138	2.97057	3.04646	3.04764	3.00412	2.94597	2.87887	3.12553	3.03254	3.10552	3.17361	overlap
mt-Nd3	0.852181	0.934544	1.13676	0.90918	1.00267	0.892384	0.902803	1.03378	1.52718	1.16942	0.921783	1.21712	1.14655	1.07811	1.28425	1.83311	1.72715	1.39353	1.81211	1.88751	1.50621	1.91442	1.6417	1.20391	1.31525	0.989372	1.32289	1.44399	1.22841	1.30311	1.43615	1.41325	1.39467	1.5838	1.50913	1.46356	1.64433	overlap

## Sheet: dmPGE2_nocutoff
	GCSF_Acute-Activation	GCSF_Cell-cycle	GCSF_Interferon	GCSF_Interferon cell-cycle	GCSF_Metabolism	GCSF_Myeloid	GCSF_Primed	GCSF_Primitive	ct_Acute-Activation	ct_Cell-cycle	ct_Interferon	ct_Metabolism	ct_Myeloid	ct_Primed	ct_Primitive	dmPGE2_Acute-Activation	dmPGE2_Cell-cycle	dmPGE2_Interferon	dmPGE2_Metabolism	dmPGE2_Myeloid	dmPGE2_Primed	dmPGE2_Primitive	indo_Acute-Activation	indo_Cell-cycle	indo_Interferon	indo_Interferon cell-cycle	indo_Metabolism	indo_Myeloid	indo_Primed	indo_Primitive	pIC_Cell-cycle	pIC_Interferon	pIC_Interferon cell-cycle	pIC_Metabolism	pIC_Myeloid	pIC_Primed	pIC_Primitive	specific
0610030E20Rik	0.303133	0.326473	0.603117	0	0.250993	0.303251	0.267221	0.290675	0.214025	0.309053	0	0.262748	0.50104	0.308252	0.292673	0.220565	0.241335	0	0.194152	0.32905	0.288457	0.363334	0.369012	0.355533	0.281747	0	0.276615	0.116523	0.30194	0.300876	0.366096	0.222194	0.260942	0.253472	0.0852878	0.266092	0.337353	MPP_only
1600002K03Rik	0.189732	0.12237	0	0	0.117211	0.119425	0.101219	0.117416	0.177186	0.0917684	0.379251	0.121041	0.227015	0.129421	0.137881	0.0719459	0.0808846	0	0.0684049	0.148508	0.0971507	0.0409331	0	0.109643	0.0740969	0	0.127101	0.358527	0.111628	0.0964617	0.106919	0.0926969	0.093338	0.124557	0.0152344	0.149953	0.0964139	MPP_only
1700020I14Rik	0.254708	0.55775	0.178481	0.90918	0.525585	0.405228	0.455645	0.421802	0.830112	0.546355	1.13495	0.512139	0.839766	0.45687	0.323258	0.368517	0.415345	0.32109	0.461309	0.394439	0.487903	0.415357	0.945241	0.562984	0.437737	0.989372	0.517161	0.380928	0.45427	0.38695	0.539709	0.389802	0.429291	0.536128	0.33869	0.462629	0.404937	MPP_only
1700029J07Rik	0.0675525	0.0300532	0	0	0.021665	0	0.0281427	0.0475464	0	0.0388744	0	0.0273387	0	0.059419	0.0602444	0.0300351	0.0232784	0	0.0207367	0.0119304	0	0.0521978	0.138072	0.0391461	0.0588521	0	0.0290258	0	0.0530174	0.0609241	0.0355995	0.024756	0.0203287	0.0228849	0.0191026	0.059559	0.0553424	MPP_only
1700030K09Rik	0	0.0700121	0	0	0.0632278	0.0402551	0.0823658	0.0654614	0.0901543	0.0519883	0	0.0882277	0	0.0604943	0.0876653	0.0497481	0.0453347	0	0.0399177	0.0439108	0.0553878	0.0611934	0.138072	0.0812016	0.114337	0	0.0625229	0	0.0801991	0.0701199	0.0585479	0.0414528	0.0548622	0.0549047	0	0.0666535	0.105375	MPP_only
1700037C18Rik	0.158927	0.0618208	0	0	0.0493152	0	0.0428824	0.0474038	0	0.0768269	0	0.0560536	0	0.0747553	0.0537898	0.0349444	0.0566441	0	0.0273744	0.0460681	0	0.0244244	0	0.0646226	0	0	0.0456721	0	0.0622064	0.043072	0.0703102	0.0523703	0.0500088	0.0499296	0.0325923	0.055984	0.0571525	MPP_only
1810011H11Rik	0	0.0410301	0	0	0.0663302	0.0402551	0.0306197	0.0555688	0.187606	0.0644008	0	0.0995611	0.227015	0.135663	0.145509	0.0826961	0.0645237	0	0.0891545	0.0958625	0.11186	0.0898492	0.161014	0.0470075	0.196858	0	0.0850296	0.270317	0.129503	0.0998781	0.0614492	0.0902702	0.0687646	0.0899325	0.0306664	0.119993	0.182384	MPP_only
1810030O07Rik	0.247912	0.255259	0.466128	0.401521	0.22554	0.163829	0.203616	0.205046	0.166782	0.290943	0.379251	0.228824	0	0.280946	0.196188	0.175903	0.233666	0	0.176442	0.190587	0.173361	0.186072	0.65638	0.272788	0.510508	0.352336	0.219816	0.0768278	0.269664	0.215578	0.24882	0.203565	0.244914	0.22969	0.149992	0.268205	0.17267	MPP_only
1810055G02Rik	0.033547	0.0118483	0	0	0.0279792	0.0326727	0.00844067	0.0228057	0	0.0189158	0	0.0320961	0	0.0180329	0.0116313	0.059938	0.079865	0	0.108375	0.028314	0.0511825	0.0736042	0	0.0170975	0	0	0.0293118	0.0959884	0.0161793	0.0201734	0.0197667	0.0213433	0.0351023	0.0209025	0.0152344	0.0150228	0.00761281	MPP_only
1810058I24Rik	0.572228	0.782646	0.918282	0	0.746612	0.528119	0.771121	0.707939	0.925212	0.788492	1.06477	0.75569	0.777465	0.841775	0.664773	0.694089	0.681059	0	0.590915	0.587007	0.656858	0.635499	0.531305	0.774445	0.656079	0.818528	0.778834	0.831478	0.897833	0.72925	0.731606	0.588412	0.583713	0.713336	0.667522	0.7856	0.633366	MPP_only
2310040G24Rik	0	0.0254461	0	0	0.0388778	0.124315	0.0470078	0.022195	0	0.0279326	0	0.0554808	0.394895	0.035966	0.0399573	0.0223663	0.0237703	0	0.0247354	0.0205948	0.0277798	0.00686471	0	0.0313787	0.0904962	0	0.0483386	0.0959884	0.058443	0.0416054	0.0392491	0.0147196	0.0216423	0.060591	0.142321	0.0357731	0.0262115	MPP_only
2510017J16Rik	0.0709541	0.029141	0	0	0.018168	0	0.0187298	0.02553	0	0.0442611	0	0.0230327	0	0.0196366	0.0237143	0.0530703	0.0830856	0	0.0713267	0.0448198	0	0.0346233	0	0.0458639	0	0	0.0252921	0.0959884	0.0415402	0.0194869	0.0544134	0.0339396	0.0550973	0.0405645	0.0240539	0.0313241	0.032276	MPP_only
2610001J05Rik	0.536847	0.388782	0.399941	0.687225	0.39334	0.249339	0.404334	0.396939	0.250787	0.507652	0	0.407182	0.621911	0.449343	0.448614	0.365072	0.443145	0	0.373584	0.46298	0.383268	0.412886	0.318806	0.478523	0.317885	0.352336	0.422478	0.395789	0.472499	0.424792	0.447771	0.398215	0.389345	0.36342	0.465327	0.429679	0.428944	MPP_only
2810001G20Rik	0.149789	0.121006	0	0	0.100551	0	0.101013	0.140394	0.156954	0.136228	0.341502	0.117409	0	0.14815	0.119121	0.0936782	0.100986	0	0.0927561	0.115338	0.065584	0.0699396	0.161014	0.102155	0	0	0.103403	0.349485	0.144032	0.117298	0.119893	0.0908564	0.0691161	0.0964365	0.123078	0.163899	0.157522	MPP_only
2900076A07Rik	0.0760195	0.0384579	0	0	0.0282466	0.0402551	0.0539461	0.0296239	0	0.0464279	0	0.036707	0	0.0661548	0.0380873	0.0295576	0.0261018	0	0.0156445	0.0533992	0.0964189	0.0192543	0.150789	0.06775	0.0743521	0	0.0564639	0	0.0728711	0.0483921	0.0613824	0.0181956	0.02772	0.0336222	0.0191026	0.0461735	0.0451057	MPP_only
3110009E18Rik	0	0.0952126	0	0	0.0835242	0.0859144	0.0859863	0.0489366	0.206727	0.0703453	0	0.0794903	0.227015	0.0825837	0.0785019	0.0427615	0.043219	0	0.0391826	0.0216782	0	0.0351231	0	0.104723	0.0468307	0	0.0747688	0	0.0931785	0.0776606	0.096344	0.0752985	0.089144	0.0805859	0.11909	0.0905988	0.0674939	MPP_only
3830406C13Rik	0.168629	0.257197	0.178481	0	0.220175	0.388833	0.258464	0.237792	0.337935	0.310748	0.720752	0.282923	0	0.358595	0.287707	0.251409	0.25282	0	0.198763	0.209982	0.234801	0.310901	0.133236	0.293115	0.207459	0.818528	0.272809	0.300907	0.387331	0.400779	0.309152	0.289787	0.214816	0.258764	0.167929	0.401554	0.375363	MPP_only
4632415L05Rik	0.033547	0.117647	0.209267	0	0.115374	0.173277	0.146303	0.101428	0	0.171403	0	0.121297	0	0.153393	0.0895278	0.0709427	0.114574	0	0.0767608	0	0.105995	0.068427	0.161014	0.15735	0.211424	0	0.108021	0	0.141247	0.0860465	0.119524	0.0553331	0.0918618	0.119799	0.0539598	0.101036	0.10402	MPP_only
4833439L19Rik	0	0.206668	0	0	0.157528	0.17157	0.120755	0.141131	0	0.103716	0	0.142173	0.227015	0.126989	0.0495242	0.127242	0.165531	0	0.126127	0.160903	0.0879698	0.107833	0.373848	0.15216	0.114023	0	0.115156	0.153794	0.108953	0.0950262	0.169229	0.140663	0.186939	0.15243	0.111857	0.114961	0.114889	MPP_only
4930453N24Rik	0.436273	0.399852	0.0783793	0.687225	0.353789	0.408905	0.286357	0.288252	0.334209	0.427856	0	0.348674	0	0.238804	0.302661	0.243556	0.315295	0	0.272649	0.342741	0.282626	0.224487	0.299086	0.450959	0.314797	0.612356	0.351212	0.223211	0.295354	0.263001	0.380005	0.292729	0.376129	0.298404	0.285432	0.283295	0.284791	MPP_only
4930555A03Rik	0	0.0815019	0	0	0.0528786	0.0934968	0.10091	0.0813416	0.0999129	0.10952	0.341502	0.0609055	0	0.122404	0.0847139	0.0546552	0.0443188	0	0.0387708	0.0386249	0.0279565	0.0506232	0	0.0947865	0.12128	0	0.0811535	0.0959884	0.143605	0.111005	0.0996121	0.0724506	0.0504302	0.0886606	0	0.140203	0.131992	MPP_only
4931406C07Rik	0.244648	0.236021	0	0	0.217859	0	0.275308	0.261362	0.262845	0.227217	0.379251	0.209834	0.227015	0.283239	0.255317	0.206656	0.167126	0	0.182087	0.128418	0.231582	0.247653	0.138072	0.228426	0.217295	0	0.246954	0.291679	0.319872	0.231617	0.241785	0.236146	0.191322	0.251907	0.147484	0.357372	0.31065	MPP_only
4933434E20Rik	0.301726	0.462749	0.643644	0	0.465596	0.766734	0.502426	0.437834	0.267152	0.376228	0.921783	0.383605	0.227015	0.430107	0.408632	0.311662	0.347195	0.32109	0.305256	0.205989	0.198496	0.406953	0.474985	0.397116	0.302071	0	0.382562	0.252254	0.48423	0.447654	0.420581	0.411709	0.402403	0.398034	0.285115	0.42362	0.420377	MPP_only
5430427O19Rik	0	0.16206	0.209267	0	0.102233	0.11438	0.100699	0.0394529	0	0.283304	0.379251	0.142321	0	0.157814	0.110763	0.0877153	0.100503	0	0.0793353	0.126889	0.0970472	0.0395127	0.138072	0.243511	0.38997	0.818528	0.150622	0.172954	0.16978	0.088733	0.37025	0.584864	0.530424	0.216374	0.197817	0.283629	0.219222	MPP_only
5730455P16Rik	0.0675525	0.163868	0.178481	0	0.13582	0.0867522	0.112687	0.126592	0.0974522	0.146639	0.341502	0.163648	0.38257	0.0730996	0.124611	0.180123	0.218325	0	0.180535	0.134119	0.080303	0.235673	0.180734	0.165584	0.0396713	0.352336	0.139461	0.0768278	0.130905	0.124713	0.175069	0.0833402	0.131136	0.147559	0.0460678	0.168516	0.136112	MPP_only
5830454E08Rik	0.0897942	0.0259323	0	0	0.0270834	0	0.0344406	0.042338	0	0.0338899	0	0.0317789	0	0.0400209	0.033231	0.0374476	0.0216606	0	0.028455	0.0275735	0.0801704	0.0203459	0	0.0410292	0	0	0.0289094	0	0.0448711	0.0561208	0.032143	0.0213104	0.00901456	0.0259751	0.0864209	0.0536934	0.0478252	MPP_only
6030458C11Rik	0	0.155321	0	0	0.191697	0.0402551	0.136738	0.114693	0	0.114765	0	0.124782	0	0.168453	0.0910268	0.0772743	0.0803186	0	0.0947823	0.0578123	0.0704846	0.0936694	0.150789	0.138771	0.0893218	0.352336	0.143548	0.417211	0.136262	0.117243	0.128267	0.107507	0.108648	0.161212	0.0727153	0.12747	0.15358	MPP_only
6330418K02Rik	0.0586226	0.0423588	0	0	0.0471092	0	0.0592417	0.0403485	0	0.117464	0	0.0722368	0	0.0594756	0.0503092	0.0220789	0.0436595	0	0.0286596	0.0442716	0	0.0422583	0.138072	0.0677091	0	0	0.0722617	0	0.0702022	0.0593864	0.0787464	0.0399862	0.0368475	0.0479523	0.0918123	0.0755813	0.0594228	MPP_only
6330562C20Rik	0.0760195	0.0643605	0	0	0.055781	0.0454007	0.0813067	0.080615	0.116632	0.0891672	0	0.0752972	0	0.0824351	0.101328	0.0596724	0.0417432	0	0.0572128	0.0462559	0.0636658	0.0976657	0	0.0621951	0.046869	0	0.0628752	0	0.0935825	0.0895562	0.0634757	0.0552223	0.0425182	0.0638091	0.0529973	0.0858888	0.135781	MPP_only
6720489N17Rik	0	0.0381328	0	0	0.0750573	0.0402551	0.0351464	0.0154518	0	0.0470609	0	0.109979	0	0.0288534	0.0144791	0.0146136	0.0261989	0	0.0468412	0.0366357	0	0	0	0.0659595	0.0854143	0	0.102958	0	0.0417864	0.0269305	0.0542406	0.0224113	0.0405553	0.0859052	0.0414685	0.0261021	0.0252546	MPP_only
9530082P21Rik	0	0.0311943	0	0	0.0246072	0	0.0308021	0.0331597	0	0.024652	0	0.0276836	0	0.049962	0.0593772	0.0175506	0.0146017	0	0.0125469	0	0	0.0753507	0	0.0164786	0.0436273	0	0.0183855	0	0.0375413	0.0557047	0.0392432	0.0670939	0.0600274	0.0341858	0	0.0702595	0.0776053	MPP_only
9930012K11Rik	0	0.0367001	0.209267	0	0.0378753	0.0384008	0.0401937	0.0387155	0	0.0779947	0	0.063524	0	0.0368116	0.0528137	0.0282595	0.0282452	0	0.0317761	0.0107519	0	0.00506141	0	0.0464504	0.036373	0	0.0534826	0	0.0659216	0.0442385	0.040166	0.00384069	0.0087301	0.0256554	0.0951392	0.0485383	0.0277785	MPP_only
9930111J21Rik2	0.0810236	0.149517	0.352892	0	0.0752698	0.352736	0.122173	0.0902603	0.173673	0.261149	1.13495	0.174114	0.227015	0.295929	0.181465	0.0688149	0.101468	0.32109	0.0546066	0.10035	0.158846	0.120244	0.150789	0.288379	0.748116	0.989372	0.182885	0	0.304441	0.196943	0.635015	1.1864	1.24572	0.420502	0.566934	0.702944	0.690781	MPP_only
A430033K04Rik	0	0.0488499	0	0	0.0325491	0	0.0230419	0.0518709	0.0570411	0.0530138	0	0.0420667	0	0.0578074	0.0463912	0.0325722	0.0663335	0	0.0347208	0.0295264	0.148596	0.0323072	0.133236	0.0600111	0	0	0.0450103	0	0.0298891	0.0406715	0.0642255	0.0102498	0.0215419	0.0455795	0.0430895	0.0303894	0.0333952	MPP_only
AA467197	0	0.0821118	0	0	0.05809	0	0.156985	0.0402645	0	0.0315075	0	0.0299237	0	0.0658157	0.0152668	0.17157	0.123168	0	0.0667372	0.084136	0.206955	0.0682591	0	0.0883141	0	0	0.0476509	0	0.0804446	0.0321319	0.0806486	0.0571473	0.0777192	0.0750979	0.0226921	0.0902096	0.0212853	MPP_only
AI480526	0.0788348	0.0660138	0.209267	0	0.0395732	0.0668846	0.0907814	0.0544321	0.195976	0.143295	0	0.0942306	0	0.169261	0.100461	0.0948059	0.0775784	0	0.0360396	0.0302347	0.119892	0.121491	0.161014	0.120272	0.136201	0	0.0846992	0	0.22329	0.102992	0.138945	0.0273746	0.0504465	0.103985	0.0758434	0.189865	0.164337	MPP_only
AI504432	0.198028	0.23096	0.178481	0.687225	0.175921	0.124057	0.144834	0.104248	0.0974522	0.215901	0.542532	0.230039	0.227015	0.19568	0.0986028	0.10932	0.147612	0	0.121856	0.152398	0.231161	0.0324806	0.138072	0.261497	0.147507	0.818528	0.226939	0	0.207801	0.135843	0.397797	0.391756	0.470328	0.28658	0.266383	0.300359	0.166467	MPP_only
AI987944	0.112382	0.161487	0	0	0.0963455	0.0384008	0.103038	0.153272	0	0.173952	0	0.124643	0	0.130215	0.133313	0.091208	0.0793826	0	0.0699889	0.0608828	0.160281	0.134508	0.133236	0.163259	0.121183	0.352336	0.121833	0.212511	0.131736	0.162201	0.162148	0.0950674	0.0920901	0.10334	0.089019	0.154819	0.189784	MPP_only
AW112010	0.884028	0.786752	0.802179	0.90918	0.66625	0.49919	0.767974	0.768636	0.783514	0.885143	0.921783	0.762461	0	0.958023	0.864401	0.768215	0.744363	0.32109	0.699998	0.486029	0.83735	0.766927	0.842911	0.846856	1.28354	1.13524	0.794059	0.574696	0.89316	0.906225	0.844713	1.08858	0.980878	0.735642	0.448533	0.903587	0.861693	MPP_only
Aaas	0.141052	0.164025	0	0	0.229307	0.21067	0.0716049	0.0557322	0.120145	0.197679	0	0.24721	0.621911	0.0926087	0.0657094	0.106716	0.253169	0	0.271777	0.178528	0.113926	0.082249	0.284025	0.230338	0.0522366	0.352336	0.264532	0.0769661	0.129716	0.0680347	0.172435	0.110372	0.226227	0.233441	0.197097	0.0787639	0.0729758	MPP_only
Abca2	0.158245	0.193875	0.178481	0	0.184845	0.229901	0.167572	0.136809	0.0901543	0.221245	0	0.22648	0.227015	0.197213	0.197079	0.195204	0.245393	0	0.273729	0.339526	0.10823	0.135967	0.422097	0.235889	0.139812	0	0.246733	0.0959884	0.210708	0.165041	0.273905	0.179184	0.238564	0.299655	0.1252	0.224016	0.228577	MPP_only
Abca3	0.068451	0.0966706	0	0	0.0497013	0.287284	0.0739639	0.0791393	0	0.070145	0	0.0761855	0	0.108186	0.122642	0.107324	0.157154	0	0.0885935	0.0360719	0.057061	0.128472	0.161014	0.122703	0.167796	0	0.0659212	0.0769661	0.085211	0.109882	0.127239	0.0579487	0.0850441	0.052506	0.0817943	0.10299	0.147904	MPP_only
Abcb10	0.108708	0.0336831	0.466128	0	0.0916728	0.0326727	0.0772781	0.0762803	0.0668688	0.038856	0	0.0691329	0	0.0410858	0.044021	0.0720464	0.0554688	0	0.100933	0.148334	0.130723	0.110214	0.161014	0.0316785	0	0	0.0628412	0.183007	0.0560347	0.0654355	0.0432548	0.0529143	0.0497296	0.0981906	0.114079	0.0597157	0.060259	MPP_only
Abcc4	0.188401	0.0664859	0	0	0.0784846	0.122273	0.0668856	0.0517034	0	0.0485016	0.341502	0.0803871	0	0.0939821	0.0556629	0.0699582	0.0802024	0	0.0722265	0.147564	0.0496618	0.0458088	0	0.0815381	0.0522366	0	0.0660642	0	0.0726583	0.0555264	0.0848325	0.0615265	0.101637	0.0737679	0.0637777	0.0807285	0.0687124	MPP_only
Abcf3	0.168996	0.154661	0.0783793	0.401521	0.190239	0.0867522	0.194734	0.227962	0.177186	0.152652	0.720752	0.183335	0	0.165668	0.195235	0.116435	0.133031	0.32109	0.136648	0.0894843	0.185055	0.167408	0	0.189198	0.11941	0.352336	0.159475	0.172954	0.179543	0.169947	0.169886	0.163449	0.155495	0.136645	0.146845	0.125975	0.188795	MPP_only
Abcg2	0.344466	0.273959	0.386784	0.90918	0.389819	0.246169	0.239149	0.436391	0.116573	0.279391	0	0.354433	0.38257	0.251656	0.417661	0.261915	0.236909	0	0.312982	0.105757	0.201236	0.425673	0.150789	0.236419	0.390882	0.352336	0.341367	0	0.273217	0.371468	0.259899	0.325736	0.204561	0.3019	0.143051	0.253917	0.481831	MPP_only
Abhd14b	0.0879726	0.11898	0.280277	0	0.145256	0.0454007	0.166617	0.146808	0.147195	0.180322	0	0.169766	0	0.248229	0.220582	0.186701	0.126851	0	0.125922	0.192806	0.130078	0.18035	0.150789	0.156968	0.0985234	0	0.173206	0.195691	0.25152	0.224663	0.131099	0.111254	0.0661167	0.17466	0.107984	0.192255	0.234422	MPP_only
Abhd4	0.033547	0.179178	0	0	0.12791	0	0.150918	0.145507	0.096063	0.204186	0	0.172959	0	0.214907	0.192699	0.256776	0.31977	0	0.216456	0.103944	0.23437	0.239198	0	0.23271	0.344282	0	0.13758	0.172816	0.2181	0.222488	0.251577	0.171975	0.15864	0.154585	0.151033	0.222136	0.226342	MPP_only
Abr	0	0.148222	0.0783793	0	0.112082	0.0916425	0.1435	0.130008	0.22683	0.168144	0.341502	0.111669	0.227015	0.172783	0.123054	0.176778	0.227928	0	0.196355	0.245059	0.186533	0.0985481	0	0.176014	0.0865402	0.352336	0.158411	0.116523	0.174229	0.13091	0.180303	0.118815	0.124311	0.146949	0.213346	0.197793	0.123731	MPP_only
Acap1	0.609995	0.512283	0	0	0.4523	0.271416	0.50715	0.433232	0.485157	0.596468	0.341502	0.539601	0.394895	0.581206	0.462804	0.612276	0.740936	0	0.508951	0.566397	0.648317	0.413192	0.464759	0.630009	0.615308	0.612356	0.533561	0.437833	0.63941	0.491181	0.621132	0.508536	0.616138	0.530899	0.35386	0.515231	0.480609	MPP_only
Acly	0.328312	0.36848	0.465163	0.401521	0.367343	0.389825	0.320295	0.300033	0.408476	0.377299	0	0.388986	0.227015	0.286504	0.300518	0.418653	0.419168	0	0.45399	0.430214	0.293488	0.264797	0.150789	0.37009	0.439099	0.352336	0.396998	0.597061	0.369228	0.263778	0.430507	0.31431	0.38515	0.452961	0.401489	0.339551	0.277095	MPP_only
Acox3	0	0.0826089	0	0	0.0554179	0.119425	0.0581939	0.0786385	0.154724	0.107105	0	0.0745233	0	0.10645	0.101735	0.125824	0.159167	0	0.0969803	0.266669	0.0746802	0.0650794	0.161014	0.115509	0.132136	0	0.0715613	0.289477	0.101349	0.122878	0.0982447	0.0596122	0.0551067	0.103928	0.122731	0.114543	0.0850716	MPP_only
Acsf3	0	0.0988005	0.209267	0	0.070404	0.117127	0.0604623	0.0656236	0.0668688	0.0975703	0	0.0788246	0	0.064878	0.0247076	0.0741607	0.141556	0	0.0966272	0.0386338	0.0785296	0.0739565	0.138072	0.0969407	0.180866	0	0.0841248	0	0.0726849	0.0505199	0.113704	0.0629444	0.088199	0.0840071	0.0637126	0.082474	0.0567711	MPP_only
Acsl3	0.146595	0.186414	0.281556	0	0.250614	0.140815	0.214977	0.228465	0.0570411	0.159417	0	0.158819	0	0.209338	0.168265	0.256115	0.205794	0	0.239023	0.104876	0.142672	0.196305	0.180734	0.181676	0.236831	0.352336	0.200495	0.231501	0.228478	0.182384	0.211621	0.13215	0.145739	0.186888	0.0730274	0.17277	0.216586	MPP_only
Actb	3.53716	3.48687	2.77299	3.14563	3.49273	4.06804	3.55072	3.4627	3.45585	3.49536	3.3002	3.56113	4.49227	3.51805	3.37966	3.38748	3.35593	2.1034	3.44989	3.61674	3.39478	3.23588	3.66422	3.46971	3.38543	3.49957	3.56813	3.55507	3.52975	3.43837	3.44429	3.36697	3.43641	3.52475	3.58078	3.51529	3.25604	MPP_only
Actn4	0.275977	0.384033	0.321561	0.401521	0.46722	0.402829	0.256648	0.263826	0.0974522	0.398744	0	0.439783	0.61275	0.259847	0.245446	0.294136	0.483847	0	0.557873	0.45224	0.377576	0.320821	0.133236	0.380458	0.37057	0.352336	0.456699	0.42741	0.254052	0.246385	0.437026	0.342249	0.451295	0.508287	0.385627	0.280367	0.239544	MPP_only
Actr1b	0.244481	0.209636	0	0.401521	0.209128	0.16761	0.197077	0.177007	0.0668688	0.148781	0.341502	0.188191	0	0.119375	0.17882	0.181289	0.207803	0	0.255068	0.163521	0.108141	0.134556	0.311803	0.145167	0.3314	0	0.185429	0.299869	0.139349	0.176519	0.148172	0.159115	0.173853	0.217754	0.0683978	0.149099	0.162528	MPP_only
Actr5	0.151978	0.169585	0	0	0.16608	0.0384008	0.150692	0.158864	0.0974522	0.145718	0.341502	0.149987	0	0.123869	0.137487	0.16833	0.191957	0.32109	0.171437	0.167705	0.110822	0.155766	0	0.167131	0.132557	0	0.148132	0	0.129994	0.166806	0.205258	0.139628	0.135586	0.148688	0.12259	0.129768	0.166321	MPP_only
Acvr1b	0.104501	0.0799421	0	0	0.0778831	0.0838015	0.0850176	0.0842679	0	0.0669101	0	0.053557	0.227015	0.0627059	0.0747622	0.0326364	0.0392236	0	0.0539685	0.100314	0.0626846	0.0789062	0	0.0933783	0.053773	0	0.0636492	0	0.0704965	0.0779113	0.0823302	0.0742417	0.0756462	0.0960876	0.0799589	0.0893213	0.115833	MPP_only
Adam9	0	0.0494311	0	0	0.0427518	0.0611382	0.0476746	0.0244388	0	0.0235723	0	0.0393646	0	0.0217602	0.0510505	0.0499518	0.0721879	0.32109	0.0573045	0.0875847	0.0232394	0.0500459	0	0.0306528	0.0304697	0	0.0437248	0	0.036597	0.033458	0.0463762	0.119608	0.0728577	0.0512218	0.052399	0.0476536	0.0517685	MPP_only
Adamts10	0.388516	0.232951	0.0783793	0.401521	0.257364	0.17157	0.277354	0.194888	0.116632	0.212814	0.933919	0.214556	0.38257	0.237635	0.155746	0.164196	0.145938	0	0.128666	0.134111	0.157773	0.112984	0	0.233999	0.232093	0.352336	0.193367	0	0.222392	0.184933	0.201717	0.102708	0.142299	0.220319	0.055905	0.244712	0.186711	MPP_only
Adcy7	0.367297	0.298613	0.178481	0	0.251271	0.329008	0.281277	0.25588	0.306699	0.376102	0.741395	0.30675	0.394895	0.414749	0.305748	0.308424	0.279048	0	0.223774	0.28757	0.336923	0.278408	0.331523	0.312206	0.164439	0.352336	0.286308	0.308467	0.381933	0.322151	0.315217	0.124538	0.153048	0.233252	0.232883	0.349225	0.328995	MPP_only
Adgre5	0	0.0110566	0.137962	0	0.0243979	0.252279	0.00864009	0.0617403	0	0.0688883	0.379251	0.0316489	0.227015	0.0226552	0.201394	0.0422776	0.0453726	0.32109	0.0270462	0.294353	0	0.118915	0	0.0510963	0.206456	0	0.0316432	0.195691	0.024646	0.187709	0.0411218	0.0454706	0.0306482	0.0283889	0.172407	0.0280012	0.151256	MPP_only
Adgrg1	1.89738	1.55745	0.960604	1.69504	1.3561	0.612152	1.36072	1.91074	1.7948	1.75423	2.22109	1.5516	0.861131	1.59541	1.96414	1.56621	1.75411	0	1.53157	0.91595	1.59718	1.8973	1.64581	1.79763	1.49487	0.612356	1.50198	0.60418	1.65036	1.95343	1.75365	1.21774	1.36446	1.41216	0.576254	1.53078	1.87628	MPP_only
Adi1	0.0788348	0.160879	0.177517	0	0.140396	0.0938109	0.134443	0.10638	0.262131	0.254078	0	0.169924	0	0.16419	0.169433	0.240182	0.310655	0.32109	0.227844	0.171684	0.24936	0.157331	0.432323	0.237537	0.104451	0	0.20859	0.242004	0.173206	0.168825	0.303409	0.157488	0.199332	0.229352	0.157166	0.219165	0.184647	MPP_only
Adipor2	0.662692	0.485762	0.255896	0.401521	0.456737	0.38447	0.464388	0.472699	0.420548	0.496546	0.341502	0.474496	0	0.513089	0.465915	0.39887	0.443389	0	0.452735	0.269339	0.336958	0.446124	0.133236	0.511957	0.407283	0	0.476351	0.332554	0.490318	0.478373	0.54847	0.442302	0.480625	0.49091	0.613946	0.549242	0.51769	MPP_only
Ado	0.289694	0.254496	0.178481	0.401521	0.247985	0.230854	0.216897	0.198832	0.0570411	0.182671	0.341502	0.269219	0.227015	0.177082	0.197237	0.144711	0.152202	0	0.15161	0.133275	0.122233	0.18411	0.133236	0.198991	0.130073	0.352336	0.201364	0.573345	0.161831	0.18103	0.203428	0.16112	0.209465	0.240125	0.193184	0.173053	0.143687	MPP_only
Adprhl2	0.261848	0.390623	0.677559	0.687225	0.419531	0.314535	0.392827	0.315602	0.253086	0.279657	0	0.38057	0.621911	0.262434	0.281073	0.215449	0.219899	0	0.257491	0.273522	0.125542	0.263107	0.350571	0.254555	0.20665	0.612356	0.343347	0	0.293734	0.294902	0.242341	0.281647	0.329587	0.339541	0.302029	0.234539	0.251985	MPP_only
Adprm	0.0675525	0.122618	0	0	0.0992542	0.0454007	0.111208	0.122818	0.0570411	0.142185	0	0.0872888	0.394895	0.12529	0.168404	0.0733826	0.0923977	0	0.0650443	0.0666761	0.11839	0.10879	0	0.128971	0.214045	0	0.102315	0.165176	0.138241	0.12782	0.123912	0.0973786	0.145314	0.101654	0.0763328	0.133547	0.106219	MPP_only
Adrb2	0.0810236	0.0611684	0	0	0.0435438	0.0384008	0.0450969	0.115206	0.116573	0.0645678	0	0.0575068	0	0.0959322	0.225354	0.100325	0.0639092	0	0.0473329	0.0590043	0.138841	0.123	0.687818	0.118944	0.11941	0	0.0553581	0	0.099455	0.286847	0.0713698	0.0738441	0.0329365	0.0455128	0.0399036	0.0475927	0.104545	MPP_only
Aen	0.278195	0.575108	0.565265	1.09071	0.709049	0.155656	0.618789	0.476401	0.293818	0.181321	0.379251	0.410653	0	0.289292	0.283038	0.244716	0.171696	0	0.295298	0.154364	0.214871	0.246465	0.150789	0.208408	0.42051	0.352336	0.370995	0.435722	0.25225	0.209382	0.236904	0.564041	0.443038	0.401383	0.236579	0.302746	0.237077	MPP_only
Aftph	0.333398	0.352715	0.355998	0.687225	0.237961	0.351672	0.281017	0.309951	0.254406	0.303005	0	0.224478	0.394895	0.271476	0.264834	0.293377	0.388809	0	0.260362	0.273576	0.377727	0.365426	0.161014	0.338042	0.243849	0	0.238883	0.0769661	0.251474	0.308134	0.385849	0.466674	0.427127	0.278854	0.381971	0.294411	0.358852	MPP_only
Agfg2	0.222615	0.145208	0	0	0.158444	0.213518	0.136679	0.0987735	0	0.107405	0	0.144162	0	0.13829	0.0869981	0.0495468	0.071179	0	0.107261	0.0984368	0.0883384	0.0656735	0	0.104627	0.0893703	0	0.127624	0.0769661	0.12566	0.0929086	0.112116	0.0364805	0.0332759	0.126848	0.11681	0.0899735	0.0789581	MPP_only
Agpat2	0.512082	0.553369	0.490823	0	0.509315	0.381103	0.515996	0.486984	0.197365	0.603376	0	0.555834	0.596747	0.53142	0.45432	0.682876	0.749219	0	0.696499	0.307596	0.444441	0.477336	0.543212	0.447122	0.310084	0.612356	0.49924	0.472617	0.545525	0.504426	0.457939	0.225487	0.283398	0.460808	0.463097	0.465932	0.386526	MPP_only
Ahctf1	0.19266	0.485085	0.177517	0.90918	0.433726	0.192812	0.41186	0.349144	0.303645	0.373098	0	0.364433	0	0.249736	0.297846	0.223783	0.290765	0	0.316639	0.136473	0.110385	0.208699	0.294251	0.363897	0.227018	0.352336	0.306706	0.135731	0.232511	0.248619	0.377047	0.316962	0.397022	0.392812	0.125155	0.263544	0.269885	MPP_only
Aim2	0.033547	0.20064	0.209267	0	0.142627	0.17167	0.171642	0.154124	0.12391	0.260121	0.592418	0.138842	0	0.262862	0.197395	0.138053	0.154954	0	0.131572	0.178736	0.104728	0.141232	0.180734	0.284794	0.207413	0.818528	0.186521	0.300688	0.265233	0.203045	0.319088	0.309713	0.322086	0.207801	0.185356	0.265796	0.253971	MPP_only
Akap10	0.033547	0.105916	0.490823	0	0.0757613	0	0.0951838	0.0899835	0.156954	0.112006	0	0.115762	0	0.115727	0.142964	0.0677824	0.0698384	0	0.0697719	0.0814007	0.078711	0.0602054	0	0.124917	0.046869	0	0.113499	0.116523	0.0965166	0.0959796	0.133161	0.0944484	0.113245	0.134167	0.150014	0.120306	0.122705	MPP_only
Akap8	0.555211	0.508768	0.499078	0.687225	0.572203	0.299515	0.53657	0.463984	0.533136	0.42755	0	0.504478	0.596747	0.329457	0.365125	0.432306	0.460543	0	0.565062	0.461347	0.462298	0.369105	0.212499	0.351301	0.380463	0.612356	0.415934	0.519109	0.339383	0.337433	0.413695	0.353863	0.429442	0.502706	0.420284	0.359104	0.318517	MPP_only
Akap9	0.424059	0.741304	0.419518	0.687225	0.722057	0.574992	0.757764	0.773901	0.397526	0.726763	0.542532	0.67776	0.50104	0.627483	0.756704	0.58905	0.647408	0	0.563642	0.461118	0.694716	0.697864	0.743281	0.697449	0.61204	0.989372	0.612449	0.496598	0.676856	0.626799	0.740132	0.688522	0.781619	0.653277	0.509804	0.687039	0.692228	MPP_only
Akna	0	0.149907	0	0	0.119446	0.173277	0.152246	0.0676744	0.193515	0.202359	0	0.111235	0	0.167854	0.100286	0.191081	0.22528	0	0.124673	0.0593326	0.215045	0.143788	0	0.159677	0.150805	0	0.129235	0.0959884	0.179108	0.0849359	0.209448	0.082525	0.124421	0.129987	0.172998	0.162583	0.0999389	MPP_only
Aldoa	1.57674	0.577191	1.08325	0.401521	1.17032	1.07669	1.52881	1.50783	1.66999	0.641159	1.84083	1.16117	1.20186	1.44651	1.53137	1.46472	0.605534	0.32109	1.01845	1.40395	1.3295	1.34466	1.80657	0.624459	1.46888	0.352336	1.18322	1.93884	1.52561	1.53876	0.555152	1.23727	0.503775	1.13613	1.38629	1.41635	1.45359	MPP_only
Alg11	0.033547	0.0781534	0	0	0.0727524	0	0.080479	0.0937384	0.254475	0.0784069	0	0.0707735	0	0.0717221	0.0548823	0.0459584	0.0412549	0	0.0388678	0.0282019	0.0846087	0.030614	0	0.0742585	0.120616	0.352336	0.0589552	0	0.0694326	0.0692006	0.0760239	0.0850735	0.072678	0.0645965	0.11978	0.0662252	0.0961098	MPP_only
Alg2	0.0897942	0.203809	0	0.90918	0.207267	0.229522	0.254808	0.261278	0.217597	0.154397	0	0.169407	0	0.221273	0.175238	0.139344	0.124328	0.563756	0.128602	0.12992	0.193494	0.132706	0.180734	0.144864	0.170166	0	0.176783	0	0.227297	0.167994	0.134868	0.124116	0.124197	0.152857	0.116812	0.168161	0.211345	MPP_only
Alkbh1	0.707377	0.521786	0.321561	0.687225	0.519684	0.400855	0.633088	0.529633	0.323359	0.346065	0	0.446888	0.227015	0.432065	0.393007	0.489109	0.480816	0.32109	0.523875	0.354983	0.425103	0.407106	0.271308	0.324827	0.524173	0	0.443128	0.824225	0.423868	0.399351	0.429639	0.639196	0.683861	0.537672	0.328535	0.477637	0.441191	MPP_only
Alkbh8	0	0.163725	0	0	0.157357	0	0.170498	0.146287	0.238049	0.158243	0	0.181547	0	0.177545	0.164024	0.129048	0.129051	0	0.122696	0.0857189	0.120732	0.10409	0.318806	0.128338	0.0865402	0	0.177123	0	0.15801	0.139305	0.161104	0.135229	0.161434	0.164352	0.160288	0.161289	0.13032	MPP_only
Alyref	0.920647	1.37259	1.29961	1.69504	1.57324	1.70332	1.04641	0.88499	0.742523	1.16784	0.796579	1.47536	1.60813	0.739441	0.70796	0.881029	1.26844	0.32109	1.57303	1.36707	0.980146	0.698496	0.560727	1.23264	1.0292	0.989372	1.49284	1.39614	0.745513	0.687088	1.1088	0.961342	1.36464	1.49334	1.13799	0.734048	0.596481	MPP_only
Amd2	0.19059	0.0990282	0	0	0.124036	0.0402551	0.112731	0.073053	0.120145	0.0872738	0	0.101964	0	0.0687565	0.0632191	0.0335076	0.0265646	0	0.0350458	0.0191652	0.0533468	0.0301004	0.138072	0.0656562	0.046869	0.352336	0.0966175	0	0.0689667	0.0811702	0.0771563	0.0584131	0.047376	0.0601754	0.0741801	0.0613618	0.061779	MPP_only
Anapc1	0.285271	0.340634	0.209267	0	0.268248	0.288505	0.232235	0.231104	0.428148	0.395178	0	0.278296	0.394895	0.218254	0.266	0.293711	0.417794	0	0.404592	0.20916	0.247656	0.233266	0.350571	0.329242	0.262449	0.352336	0.274681	0.135512	0.225389	0.227414	0.421716	0.240393	0.377383	0.353751	0.226414	0.251643	0.261558	MPP_only
Anapc7	0.068451	0.326686	0	0.401521	0.254536	0.414158	0.24648	0.225876	0.374855	0.426206	0.720752	0.315038	0	0.300688	0.256496	0.239729	0.339151	0	0.252299	0.183163	0.258431	0.154612	0.288861	0.442656	0.338398	0.352336	0.271262	0.172954	0.24776	0.277397	0.421548	0.200884	0.325459	0.269318	0.212331	0.235336	0.22462	MPP_only
Ankle1	0	0.228607	0	0.401521	0.0873333	0.276249	0.0014855	0.00132242	0	0.278901	0	0.0852184	0	0	0.00456034	0.00211301	0.169212	0	0.078702	0.0438974	0	0.00487514	0	0.309692	0.0396713	0.352336	0.0953186	0	0.00250501	0	0.285546	0.00928125	0.128416	0.079022	0.0191026	0.00272262	0.00274604	MPP_only
Ankrd16	0.109566	0.135969	0	0	0.0936171	0.193315	0.12047	0.115986	0.12391	0.133812	0	0.0861993	0.38257	0.122683	0.13282	0.10466	0.0981427	0	0.0673934	0.1563	0.124376	0.0998759	0	0.125755	0.178947	0	0.0921673	0.0768278	0.182794	0.111638	0.133958	0.0731298	0.0859053	0.111192	0.0315589	0.103645	0.158534	MPP_only
Anln	0	0.394313	0	0.401521	0.11456	0.240735	0.00718507	0.0123881	0	0.466996	0	0.116782	0	0.0302459	0.0114373	0.0182965	0.172615	0	0.10246	0.0997493	0	0.0299733	0	0.429306	0.0657148	0.818528	0.130774	0	0.0116867	0.019143	0.428015	0.0312394	0.300469	0.159221	0.155153	0.0253188	0.00698962	MPP_only
Anp32a	1.50126	1.35691	1.14858	1.49485	1.44485	1.29827	1.30342	1.12168	1.29434	1.42759	1.83661	1.55272	1.07194	1.29877	1.22722	1.30903	1.39494	0	1.4142	1.25079	1.37326	1.10845	1.54699	1.43067	1.24925	1.37541	1.48984	1.59726	1.37892	1.24233	1.41077	1.13813	1.26991	1.50672	1.5387	1.33399	1.18074	MPP_only
Anp32e	0.780485	1.40162	0.0783793	1.86176	1.02362	1.26273	0.714013	0.786723	0.880842	1.37102	0.341502	0.964372	0.991642	0.557731	0.516748	0.690788	1.34572	0.32109	1.08492	0.947019	0.635777	0.653105	1.2131	1.31472	0.52901	1.73099	0.956886	1.41837	0.562546	0.553683	1.35807	0.666872	1.26212	0.943939	0.875776	0.498006	0.50777	MPP_only
Ap2a2	0.509197	0.21438	0.287646	0	0.20896	0.122209	0.164547	0.167629	0.193515	0.178252	0	0.17987	0	0.185923	0.19816	0.351209	0.366738	0.32109	0.310199	0.325426	0.173941	0.227231	0.294251	0.213259	0.202572	0.352336	0.192832	0.31897	0.201607	0.207188	0.258377	0.128764	0.186607	0.214638	0.216108	0.216643	0.150233	MPP_only
Ap2b1	0.36446	0.290993	0.387749	0.401521	0.20023	0.355115	0.191703	0.243555	0	0.299181	0.379251	0.213472	0	0.215561	0.216487	0.270766	0.403334	0	0.287517	0.209381	0.259411	0.250734	0.511585	0.346408	0.111458	0.352336	0.256986	0.255726	0.214073	0.28046	0.381701	0.233774	0.322839	0.265386	0.231227	0.236298	0.228873	MPP_only
Ap3s1	0.107505	0.27178	0.209267	0.687225	0.210679	1.05231	0.169137	0.197758	0.162932	0.199805	0.720752	0.201582	0.38257	0.164945	0.173681	0.210672	0.283809	0.563756	0.248241	1.32592	0.0932159	0.172799	0	0.216975	0.26354	0.352336	0.219504	1.67146	0.199425	0.154258	0.223872	0.186717	0.23558	0.207952	1.70026	0.209786	0.14948	MPP_only
Ap4m1	0.0897942	0.221129	0.399941	0.401521	0.197024	0.216794	0.256347	0.209151	0.0668688	0.231188	0	0.280194	0	0.241482	0.235586	0.175913	0.203081	0	0.205166	0.190443	0.189992	0.20087	0.469594	0.263631	0.15284	0	0.218796	0.0768278	0.285771	0.258358	0.210514	0.135389	0.137711	0.208852	0.203026	0.267958	0.193681	MPP_only
Apaf1	0.0897942	0.0723397	0	0	0.0653268	0.289617	0.0631557	0.0461209	0.244648	0.105142	0	0.0572562	0.61275	0.0596975	0.0758127	0.139036	0.130582	0	0.176987	0.105955	0.112924	0.0635166	0	0.106874	0.045743	0	0.0790547	0.0769661	0.0590161	0.0723384	0.167346	0.371164	0.324496	0.130008	0.0956526	0.102394	0.123201	MPP_only
Apbb2	0	0.032926	0	0	0.0273392	0	0.0247861	0.0299476	0.0570411	0.0914996	0	0.0387368	0	0.0642178	0.0439677	0.14057	0.111626	0	0.0860814	0.0146951	0.0761874	0.102849	0	0.0474152	0	0.352336	0.0434036	0.193489	0.0569454	0.0448136	0.0638093	0.038427	0.0390606	0.0378691	0.030218	0.064472	0.0446123	MPP_only
Apex2	0.109566	0.065998	0	0	0.098095	0	0.0768546	0.0637163	0	0.115404	0	0.10678	0.227015	0.0771101	0.0691856	0.0445119	0.0567465	0	0.0688349	0.0345053	0.149152	0.0581557	0	0.0772052	0.0657148	0	0.090059	0.0959884	0.0749767	0.062795	0.0915394	0.0596217	0.0856317	0.0798406	0.0773524	0.0572091	0.0473639	MPP_only
Api5	0.59017	0.459201	0.177517	0.401521	0.506019	0.401561	0.410591	0.404519	0.0570411	0.369652	0.379251	0.364277	0.227015	0.291313	0.314045	0.367357	0.414003	0	0.485634	0.458629	0.303126	0.275806	0.492537	0.359443	0.181919	0	0.395544	0.318738	0.321579	0.269249	0.433297	0.38207	0.390523	0.411823	0.541279	0.362303	0.386135	MPP_only
Aqp9	0	0.0634351	0.178481	0	0.0854784	0.0532417	0.0874823	0.0799428	0.312549	0.0889539	0.341502	0.0403192	0.227015	0.107585	0.0604411	0.0658635	0.0350683	0	0.0344742	0.102521	0.0841345	0.0701344	0.138072	0.0504121	0.0470226	0	0.0517689	0.255726	0.0964535	0.0728541	0.0576914	0.120863	0.0504255	0.0549655	0.174141	0.0931238	0.115118	MPP_only
Arap2	0.033547	0.188228	0	0	0.122724	0.10714	0.120918	0.0747272	0.0668688	0.191303	0	0.114709	0	0.14703	0.0984865	0.161274	0.234986	0	0.148328	0.146681	0.185987	0.102832	0	0.230678	0.114376	0	0.172525	0.0959884	0.1419	0.0953975	0.181178	0.15003	0.244794	0.188708	0.0586405	0.123932	0.0741612	MPP_only
Arf1	1.59106	1.40084	1.29961	1.09071	1.4316	1.53067	1.39857	1.30721	1.45809	1.28119	1.47982	1.33353	1.5102	1.28255	1.20161	1.37513	1.3857	0.922082	1.40966	1.53268	1.2381	1.20183	1.35164	1.2518	1.20485	0.818528	1.37624	1.60717	1.31467	1.21249	1.26013	1.30789	1.31592	1.35668	1.57139	1.26538	1.12725	MPP_only
Arf6	0.244648	0.4298	0.387749	0.401521	0.384454	0.339943	0.337382	0.320013	0.283812	0.415949	0	0.362901	0.227015	0.309743	0.435005	0.387344	0.577404	0.32109	0.459603	0.513586	0.189093	0.326556	0.138072	0.362474	0.351569	0.352336	0.403732	0.29953	0.288597	0.341508	0.392685	0.358618	0.442268	0.371486	0.391751	0.287717	0.314037	MPP_only
Arfrp1	0.387355	0.452972	0.640538	0	0.463175	0.385802	0.389979	0.383457	0.58056	0.46551	0	0.363142	0.621911	0.316345	0.326185	0.30117	0.328919	0	0.356608	0.225843	0.176559	0.300162	0.449875	0.365921	0.326904	0.818528	0.403877	0.496379	0.367202	0.336349	0.386787	0.329018	0.407854	0.429515	0.304032	0.348463	0.322253	MPP_only
Arhgap11a	0.0675525	0.451183	0	0	0.147152	0.511233	0.0540193	0.0297121	0.12391	0.486693	0	0.186157	0.227015	0.0299382	0.0427914	0.0474312	0.323694	0	0.171369	0.155403	0	0.0430528	0.161014	0.516907	0.070141	0.612356	0.161425	0.212511	0.037378	0.0382554	0.599467	0.0724928	0.43804	0.184739	0.220969	0.0488831	0.0264266	MPP_only
Arhgap17	0.582834	0.382535	0	0	0.315784	0.705443	0.396984	0.488803	0.299738	0.47242	0.933919	0.471809	0.777465	0.577748	0.550464	0.422471	0.477414	0	0.348605	0.343856	0.411034	0.436801	0.64471	0.571667	0.462591	0.352336	0.442953	0.723518	0.524562	0.554969	0.542074	0.432394	0.485448	0.495375	0.366444	0.655078	0.579005	MPP_only
Arhgap25	0	0.277588	0.178481	0	0.212066	0.266307	0.242793	0.228693	0.0901543	0.252516	0	0.231295	0.227015	0.251875	0.211807	0.290454	0.310026	0	0.234073	0.173836	0.454524	0.252371	0	0.286482	0.18141	0.818528	0.190248	0.195691	0.265939	0.272637	0.309443	0.294656	0.342702	0.24241	0.225325	0.31784	0.377905	MPP_only
Arhgap27	0.0586226	0.108255	0	0	0.116126	0.0768722	0.141162	0.0899614	0.0668688	0.123049	0	0.122096	0.394895	0.13464	0.0930587	0.0707035	0.0808417	0	0.101307	0.0709757	0.131971	0.0446602	0.352215	0.129061	0	0	0.109866	0	0.125461	0.0870285	0.0939295	0.0882756	0.0911645	0.12954	0.0955111	0.134885	0.109302	MPP_only
Arhgap32	0.109566	0.188507	0	0	0.141788	0.0786559	0.144516	0.160845	0.247108	0.269919	0	0.245407	0	0.175762	0.190623	0.279349	0.357644	0	0.27633	0.0477348	0.350873	0.278047	0.488092	0.284208	0.158972	0	0.190131	0	0.192913	0.180256	0.322641	0.196989	0.239047	0.190542	0.0552434	0.238583	0.209807	MPP_only
Arhgef39	0	0.275352	0	0	0.0664794	0.0454007	0.0154013	0.0187684	0	0.402075	0	0.110436	0	0.0342483	0.0258838	0.0333082	0.219265	0	0.0560192	0.0846062	0.0298977	0.0167082	0	0.367773	0	0.352336	0.109729	0	0.0336063	0.0219086	0.455024	0.0221123	0.199417	0.0864199	0.0877842	0.0475834	0.0375318	MPP_only
Arid1a	0.405401	0.731177	0.490823	0.687225	0.615017	0.407622	0.645268	0.592901	0.824139	0.839268	0.542532	0.695097	0.777465	0.670063	0.615597	0.550949	0.748593	0	0.602376	0.525506	0.631464	0.458818	0.474985	0.777022	0.731344	0.612356	0.649652	0.395518	0.676565	0.632225	0.955467	0.669584	0.837594	0.769136	0.546655	0.824254	0.774755	MPP_only
Arl11	0.0675525	0.11325	0	0	0.0773807	0.466589	0.122754	0.035448	0.1835	0.207921	0.68552	0.200916	0.61275	0.282689	0.0798903	0.137381	0.167496	0	0.116275	0.245267	0.266782	0.0658064	0.180734	0.228178	0.159606	0.612356	0.211233	0.358527	0.296574	0.0967427	0.239549	0.0352971	0.0708245	0.199369	0.403179	0.211972	0.0569822	MPP_only
Arl6ip1	1.44093	2.15392	1.08373	1.24429	1.23229	1.56201	1.22897	1.23904	0.901635	2.37368	1.49174	1.32814	1.72022	1.3507	1.31354	1.25596	2.09508	0.32109	1.25487	1.43282	1.26275	1.19626	1.13814	2.29172	1.56274	2.55154	1.30496	1.31462	1.33722	1.36202	2.35079	1.52104	2.16567	1.40995	1.42106	1.42612	1.31145	MPP_only
Arntl	0.183022	0.0641174	0	0	0.0668387	0.224687	0.0449778	0.0702601	0.0901543	0.108582	0	0.0984485	0.394895	0.0857	0.10013	0.0558159	0.0495731	0	0.0372713	0.0595521	0.0315559	0.0671097	0.133236	0.153732	0.090146	0.352336	0.0977181	0.135512	0.0942191	0.104509	0.111186	0.0379023	0.0557018	0.0689453	0.0621713	0.073534	0.0954222	MPP_only
Arpc5l	0.440762	0.831659	0.74064	1.24429	1.01828	0.77886	0.800648	0.72371	0.429403	0.705573	0.341502	0.826125	1.57075	0.673577	0.575421	0.506111	0.605444	0.32109	0.732028	0.431148	0.457529	0.467474	0.790023	0.710059	0.490307	1.47684	0.854264	0.891093	0.616365	0.532814	0.659718	0.527418	0.662657	0.815606	0.680196	0.573915	0.492153	MPP_only
Arpp19	0.662192	0.662093	0.490823	1.24429	0.754773	0.815224	0.597176	0.530651	0.532215	0.700638	1.06477	0.772411	0.38257	0.515063	0.506217	0.612941	0.77038	0	0.903028	0.71977	0.578155	0.52704	0.829841	0.696915	0.551754	0.818528	0.77036	0.767047	0.567325	0.539273	0.679873	0.610581	0.65071	0.784922	0.743573	0.53127	0.484435	MPP_only
Arrb2	0.236768	0.176807	0	0.401521	0.219128	0.349617	0.190688	0.158262	0.164321	0.205981	0	0.281348	0.621911	0.270815	0.1845	0.224547	0.214714	0	0.264125	0.373435	0.202592	0.11779	0.299086	0.24201	0.150749	0	0.264124	0.427191	0.267554	0.192386	0.291017	0.158875	0.150884	0.278106	0.25427	0.221918	0.160684	MPP_only
Aspm	0	0.627176	0	0	0.0611328	0.0768722	0.011547	0.0152888	0	0.802231	0	0.0729912	0	0.00199785	0.00596694	0.00849038	0.405478	0	0.0462608	0.0656344	0	0.00487514	0	0.803302	0	1.13524	0.0831439	0.195691	0	0.00978328	0.846089	0.0128394	0.526105	0.0863995	0.0966214	0.0143915	0.0118109	MPP_only
Asxl2	0.394981	0.430711	0	0.401521	0.435432	0.16457	0.438041	0.383195	0.337994	0.350975	0.379251	0.357873	0.394895	0.406934	0.348919	0.421486	0.436158	0	0.413814	0.280992	0.574921	0.399691	0.350571	0.39268	0.608954	0.352336	0.367863	0.242142	0.37929	0.346487	0.426227	0.32926	0.375975	0.441711	0.316826	0.421048	0.365822	MPP_only
Atat1	0.101998	0.142182	0.0783793	0.401521	0.102121	0.0611382	0.138714	0.147963	0.330637	0.236834	0.341502	0.16401	0.38257	0.243842	0.174237	0.123489	0.14666	0	0.0971198	0.0497108	0.301152	0.0678667	0.161014	0.221226	0.236002	0	0.147557	0	0.256708	0.194006	0.217357	0.15177	0.173554	0.14651	0.042604	0.216946	0.186356	MPP_only
Atf4	1.17287	0.876135	0.823211	0.687225	0.778446	0.802433	0.791085	1.02966	0.809092	0.598697	0.921783	0.592308	0	0.509809	0.777039	0.727657	0.767073	0.758884	0.669098	0.744386	0.732555	0.767565	0.702566	0.689009	0.783524	1.37541	0.601542	0.695132	0.534315	0.731779	0.738243	1.046	1.10413	0.63564	0.60232	0.560328	0.725017	MPP_only
Atg13	0	0.0678384	0.0783793	0	0.0609115	0.109545	0.0511181	0.0775911	0	0.0739907	0	0.0889651	0.227015	0.0786541	0.0723555	0.103558	0.107973	0.563756	0.149156	0.146306	0.10998	0.0750193	0.150789	0.105309	0.0743521	0	0.090839	0.193489	0.0785162	0.0599404	0.104227	0.0785325	0.086337	0.109037	0.107798	0.0707076	0.0866465	MPP_only
Atg16l1	0.217939	0.180143	0.281556	0	0.18676	0.245935	0.174613	0.203511	0.120145	0.166463	0	0.142903	0	0.148085	0.142667	0.1936	0.227223	0	0.212867	0.176767	0.155572	0.203732	0.180734	0.132944	0.373492	0	0.153513	0.193489	0.151937	0.185679	0.145988	0.153503	0.191712	0.15606	0.162166	0.172015	0.150544	MPP_only
Atg4a	0.068451	0.0676265	0.209267	0	0.0461477	0.0454007	0.0487693	0.0405446	0	0.0659993	0.379251	0.0605784	0	0.0783456	0.0396675	0.0180542	0.040919	0	0.0502455	0.0937099	0	0.0182448	0	0.0956412	0.036373	0	0.0549878	0	0.053635	0.0598045	0.082032	0.051004	0.0651255	0.0577576	0.0720782	0.054978	0.0648318	MPP_only
Atp10a	0.0760195	0.0872323	0.209267	0.401521	0.110727	0.152799	0.133602	0.0604808	0.154493	0.0802364	0	0.127981	0	0.0919919	0.0697629	0.139511	0.120086	0	0.138517	0.0578236	0.139404	0.103481	0	0.104696	0.265554	0	0.106922	0.116523	0.112938	0.109515	0.159003	0.217874	0.234194	0.151994	0.200569	0.11557	0.128301	MPP_only
Atp1b3	0.533934	0.583542	0.668026	0.90918	0.697028	0.800251	0.525717	0.341438	0.296416	0.422417	0.542532	0.717411	0.777465	0.397321	0.285643	0.532245	0.618715	0.32109	0.774792	0.488921	0.552936	0.319874	0.150789	0.482653	0.560051	0.818528	0.676362	0.523885	0.394482	0.247451	0.548395	0.53348	0.657534	0.722258	0.439536	0.456245	0.346091	MPP_only
Atp2b4	0.573327	0.648563	0.178481	0.401521	0.450005	0.0786559	0.424062	0.522557	0.293818	0.699152	0.592418	0.448836	0.839766	0.515525	0.492877	0.575871	0.731232	0	0.580628	0.398148	0.388468	0.549792	0.133236	0.723424	0.389252	0.818528	0.448106	0.344614	0.526458	0.593541	0.821732	0.395848	0.554523	0.514096	0.155093	0.616637	0.569978	MPP_only
Atp5a1	1.95606	1.9047	1.35094	1.59995	1.88445	1.97514	1.71718	1.67551	1.2449	1.8886	1.91344	1.91192	2.04266	1.72062	1.65951	1.82608	1.9985	0.922082	1.93709	1.82053	1.58542	1.74362	1.86972	1.91844	1.73448	1.65324	1.89346	1.96002	1.67614	1.64298	1.84681	1.67427	1.87569	1.91904	1.81737	1.67918	1.62549	MPP_only
Atp5e	1.42317	1.22198	1.35318	1.78187	1.33404	1.51467	1.25408	1.18438	1.23016	1.29564	1.6526	1.44279	1.78994	1.25696	1.23147	1.34957	1.37552	0.563756	1.52605	1.57128	1.06692	1.31759	1.36568	1.26928	1.27003	0.818528	1.48766	1.77138	1.28694	1.22358	1.28183	1.2688	1.25979	1.49631	1.64171	1.33746	1.22832	MPP_only
Atp5g3	1.37192	1.20586	0.711811	1.09071	1.39664	1.30884	1.13924	0.987952	0.718589	1.11262	1.13495	1.31698	1.57095	0.901486	0.860434	0.992372	1.17988	0.563756	1.32828	1.24496	0.88727	0.879864	0.995586	1.10527	1.01725	1.26252	1.26153	1.47799	0.887162	0.854342	1.05724	0.976183	1.12126	1.2617	1.41265	0.883454	0.822795	MPP_only
Atp5l	1.36303	1.2908	0.76233	0.90918	1.3667	1.40495	1.21003	1.24175	1.02868	1.38129	1.17583	1.42297	1.30489	1.21768	1.17146	1.28187	1.44167	1.06235	1.44147	1.55304	1.09166	1.16143	1.76841	1.38363	1.3854	0.818528	1.4296	1.56363	1.24895	1.19103	1.32444	1.2195	1.31346	1.3949	1.62489	1.19827	1.20679	MPP_only
Atp6v0b	0.900158	0.776344	1.12431	0.90918	0.755593	1.0833	0.790596	0.831675	0.890045	0.795253	1.27794	0.79587	1.78097	0.919061	0.890149	0.755035	0.735616	0.758884	0.718832	1.12471	0.880491	0.795646	0.756775	0.891701	0.707179	0.612356	0.76481	1.23098	0.856018	0.884067	0.764107	0.772529	0.677266	0.743136	1.25923	0.826252	0.828492	MPP_only
Atp6v0d1	0.310682	0.339888	0.627506	0	0.303662	0.269926	0.338727	0.333096	0.398521	0.332641	0.720752	0.296138	0.227015	0.357786	0.376942	0.399447	0.390151	0	0.355164	0.49967	0.505297	0.431431	0.587991	0.385723	0.467049	0	0.329513	0.68332	0.360985	0.411885	0.341321	0.301679	0.32057	0.329288	0.540243	0.350178	0.420865	MPP_only
Atp6v1f	1.10253	1.03083	1.34833	0.90918	1.16723	1.10422	1.18683	1.20887	1.29232	1.14474	1.42692	1.16507	1.57095	1.25952	1.13013	1.14364	1.07251	0.922082	1.10563	1.23648	1.12647	1.15986	1.19152	1.15677	1.11828	0.612356	1.16593	1.14534	1.20849	1.19279	1.0515	1.06425	1.04174	1.09572	1.11704	1.11197	1.18235	MPP_only
Atxn1l	0.0709541	0.0538761	0	0	0.0625841	0	0.0358484	0.0439124	0	0.0542613	0	0.0397674	0	0.0440242	0.0310753	0.0604228	0.0954568	0.563756	0.0458366	0.0516196	0.0518539	0.0648695	0	0.0484398	0.0396713	0.352336	0.0444589	0	0.0444656	0.057389	0.065761	0.0608468	0.0805686	0.0639935	0.0714485	0.0458688	0.0509708	MPP_only
Aup1	0.378767	0.401174	0.316443	0.401521	0.345907	0.353396	0.314108	0.301812	0	0.378734	0	0.401656	0.227015	0.317974	0.237386	0.359348	0.474457	0.563756	0.416363	0.396253	0.436949	0.304104	0.47982	0.378008	0.270991	0.612356	0.407835	0.0769661	0.294061	0.294857	0.398518	0.341032	0.45272	0.398173	0.405274	0.312	0.309547	MPP_only
Aurka	0	0.624583	0	0.401521	0.0826227	0.34669	0.033551	0.0054962	0.116573	0.788586	0	0.13054	0	0.0324138	0.0238366	0.0244555	0.272698	0	0.0774757	0.0402078	0	0.0127859	0	0.728961	0	1.13524	0.143745	0	0.0198789	0.0200773	0.767895	0.0244119	0.426658	0.101926	0.0985443	0.0151998	0.0138195	MPP_only
Aurkb	0	0.898519	0	1.09071	0.482312	0.869142	0.00980208	0.00106451	0.0668688	0.991123	0	0.518104	0	0.0174656	0.0129469	0.0308603	0.819318	0	0.481371	0.244415	0	0.0149798	0	1.03294	0.0522366	0.989372	0.502107	0.135731	0.0107614	0.00662169	0.932558	0.0948274	0.877905	0.471041	0.240886	0.0131339	0.0174059	MPP_only
Azin2	0	0.0400567	0	0	0.0335528	0	0.0313176	0.0238391	0	0.0585762	0	0.0392291	0	0.0456975	0.0330282	0.0526019	0.102756	0	0.0629235	0.0238413	0.0493955	0.076412	0	0.0901406	0	0.818528	0.0672227	0.0959884	0.0776324	0.0632698	0.0782733	0.029956	0.0476037	0.0650075	0.0436467	0.0531902	0.0439375	MPP_only
B230219D22Rik	0.25228	0.429755	0.209267	0.401521	0.432987	0.478877	0.358641	0.343367	0.310088	0.449784	0	0.473844	0.621911	0.293831	0.292363	0.280952	0.322812	0	0.3617	0.242613	0.22108	0.288794	0.488092	0.432353	0.502685	0.352336	0.482343	0.414779	0.338275	0.329103	0.515091	0.327527	0.404411	0.508956	0.466683	0.390687	0.320598	MPP_only
B230354K17Rik	0.265853	0.145495	0.209267	0	0.103067	0.0384008	0.110312	0.094005	0.211765	0.128427	0	0.105505	0	0.160865	0.080162	0.0635835	0.0990473	0	0.0668368	0.042084	0.0193091	0.0758322	0.294251	0.122865	0.0952251	0	0.0963443	0.193489	0.102502	0.100277	0.158898	0.0775546	0.0920763	0.104509	0.107713	0.103829	0.12569	MPP_only
B3galt4	0.0897942	0.0650333	0.287646	0	0.0473097	0.0454007	0.0677634	0.081022	0.263827	0.104834	0	0.0517753	0	0.113939	0.0488594	0.0328114	0.0416324	0	0.0311535	0.0975092	0.0575185	0.00415203	0	0.0611171	0.114376	0	0.058353	0.172816	0.116322	0.0467353	0.0446362	0.0258707	0.0237666	0.058529	0.0571409	0.10075	0.0589211	MPP_only
B4galt4	0.148576	0.0736217	0.209267	0	0.165928	0.078173	0.121238	0.176441	0.193515	0.115201	0	0.139556	0.61275	0.121066	0.117971	0.20667	0.256276	0	0.198716	0.148696	0.238388	0.211824	0	0.104706	0.0985234	0	0.1337	0.0768278	0.111422	0.156984	0.104327	0.19554	0.152372	0.181599	0.171749	0.153968	0.181852	MPP_only
BC030867	0	0.109249	0	0.401521	0.105781	0.0326727	0.00131452	0	0	0.121582	0	0.164204	0	0.00598324	0	0.00690956	0.0797771	0	0.0860038	0.0279648	0	0	0	0.168013	0.0522366	0	0.120916	0.0769661	0.00587592	0.00471965	0.124974	0.030014	0.152671	0.129251	0.0521697	0.00596119	0.00153034	MPP_only
BC035044	0.31255	0.62311	0.603117	0.687225	0.554917	0.868112	0.54021	0.0765196	0.299267	0.601352	0.720752	0.63583	1.38098	0.666965	0.0616807	0.320643	0.479823	0	0.447202	0.53161	0.651425	0.0439075	0	0.693491	0.534051	1.13524	0.65865	1.52644	0.67469	0.121541	0.770454	0.292229	0.575218	0.711691	0.587866	0.595417	0.0680654	MPP_only
BC037034	0.0897942	0.123767	0	0	0.131346	0.1655	0.14581	0.136133	0.0570411	0.154092	0	0.137238	0	0.126783	0.156689	0.0636623	0.0657456	0	0.0904827	0.135148	0.0784272	0.0439891	0	0.120383	0.121375	0	0.130075	0.42499	0.124783	0.121631	0.138745	0.100923	0.13071	0.14209	0.257954	0.141687	0.119233	MPP_only
BC147527	0	0.0400406	0.386784	0	0.0293726	0.196007	0.0413743	0.0366522	0.221592	0.0544397	0.341502	0.0508466	0	0.0724993	0.0733412	0.0213831	0.0133772	0	0.0143985	0.0305438	0.0569047	0.0125828	0	0.0689638	0.3059	0.352336	0.0537586	0.153794	0.0824705	0.0512622	0.150474	0.334691	0.321869	0.173629	0.0607436	0.200616	0.163504	MPP_only
Bach2	0.176958	0.0941426	0	0	0.0449799	0	0.0777498	0.103651	0	0.0778716	0	0.0431647	0	0.053094	0.042524	0.0811193	0.147775	0	0.0544799	0.0170996	0.0189105	0.124008	0	0.0943073	0.0468307	0.612356	0.0426056	0	0.0566619	0.06788	0.139379	0.0736277	0.10817	0.0625676	0	0.0836835	0.0917654	MPP_only
Bag5	0.434787	0.37478	0.0783793	0.687225	0.436052	0.231971	0.50077	0.444456	0.612862	0.302699	0	0.379388	0	0.332523	0.327427	0.238076	0.286049	0	0.303235	0.302034	0.218877	0.19341	0.271308	0.292848	0.35036	0.352336	0.359118	0.308547	0.322497	0.292271	0.25053	0.39248	0.429986	0.356714	0.271127	0.301467	0.284294	MPP_only
Bag6	0.373152	0.317749	0.177517	0.687225	0.344559	0.322674	0.309498	0.305616	0	0.326041	0.379251	0.344236	0.50104	0.295768	0.26733	0.395178	0.457124	0	0.508798	0.397721	0.303611	0.324954	0.432323	0.375686	0.302929	0	0.382516	0.331422	0.305882	0.303277	0.408269	0.362022	0.432773	0.448558	0.299307	0.323174	0.334518	MPP_only
Baiap2	0.169551	0.237756	0	0.401521	0.209723	0	0.223307	0.113903	0.0570411	0.125339	0	0.165069	0	0.23547	0.123742	0.286113	0.30822	0	0.254465	0.243996	0.396346	0.0939071	0	0.161886	0.0886095	0	0.199413	0.212559	0.211029	0.139754	0.162674	0.11717	0.125172	0.182295	0.118541	0.211733	0.0960913	MPP_only
Bbc3	0.068451	0.0464036	0.387749	0	0.0541096	0.0384008	0.151726	0.154967	0.0570411	0.0585599	0.592418	0.0604429	0	0.147784	0.173434	0.0654001	0.0248589	0	0.042485	0.0606618	0.149227	0.0677705	0	0.0612043	0.132834	0	0.0543138	0.0959884	0.134716	0.181282	0.0391756	0.10896	0.0607317	0.0535739	0	0.0961645	0.0930363	MPP_only
Bbs4	0.033547	0.0507306	0	0.401521	0.0361219	0.112285	0.0359933	0.0554253	0.0974522	0.105203	0.379251	0.0626388	0	0.0729499	0.0868055	0.0385042	0.10605	0	0.0374404	0	0.0340281	0.0882433	0	0.0923758	0	0	0.0498408	0	0.0682238	0.0633793	0.0701115	0.0336443	0.0472919	0.0301927	0	0.0688898	0.087085	MPP_only
Bcas2	0.526387	1.00821	0.363558	0.90918	0.959202	0.997226	0.788027	0.859403	0.52985	0.958512	0.796579	0.961343	0.777465	0.814131	0.757221	0.67794	0.907227	0	0.88126	0.646636	0.662822	0.67645	1.01613	0.965722	0.712268	0.818528	0.902051	0.755365	0.70087	0.703256	0.909466	0.727026	0.827791	0.852505	0.71998	0.714465	0.627808	MPP_only
Bcl2	0.450442	0.629748	0.137962	0.687225	0.665509	0.440261	0.541005	0.355912	0.29981	0.63028	0.592418	0.617892	1.14655	0.586511	0.352918	0.36624	0.446649	0	0.399008	0.477462	0.495312	0.374657	0.861256	0.671067	0.460367	0.818528	0.686672	1.0414	0.445912	0.365117	0.691791	0.369295	0.542686	0.724429	0.485787	0.585624	0.412426	MPP_only
Bcl2l11	0.162888	0.0802376	0.137962	0	0.121748	0.123574	0.145233	0.193323	0.354078	0.0602536	0	0.134384	0	0.108118	0.185287	0.86847	0.895566	0.32109	0.573619	0.436858	0.798225	0.34465	0.180734	0.0975709	0.129766	0	0.115608	0.116523	0.0981375	0.20849	0.0988593	0.299723	0.239709	0.121406	0.0713537	0.125711	0.115733	MPP_only
Bcl3	0.033547	0.234812	0	0.401521	0.211173	0.167076	0.234758	0.148302	0	0.0309303	0.720752	0.0279451	0	0.0675538	0.0286064	0.170521	0.206974	0	0.118672	0.0716694	0.140759	0.135957	0	0.0447838	0.141859	0	0.0558152	0.0768278	0.0562736	0.0352372	0.207412	0.90238	0.971718	0.235377	0.207701	0.189672	0.251381	MPP_only
Bcorl1	0.267907	0.112496	0	0	0.0969899	0.137043	0.122958	0.107492	0.0570411	0.0967888	0.341502	0.0921712	0	0.092557	0.124248	0.0641445	0.0616579	0.32109	0.0768319	0.00723481	0.0763612	0.0773605	0	0.0886706	0	0.352336	0.0749065	0.0959884	0.0807969	0.100201	0.0703428	0.0717841	0.0506254	0.0711737	0.11072	0.100741	0.0900955	MPP_only
Bcr	0.033547	0.121161	0	0	0.115046	0.185453	0.128607	0.117489	0.154493	0.159741	0	0.139557	0	0.148188	0.133869	0.211132	0.253099	0	0.194197	0.129408	0.219926	0.187212	0.133236	0.161698	0.036373	0.352336	0.152719	0	0.145916	0.129776	0.224028	0.148898	0.18735	0.191561	0.0706253	0.186926	0.137239	MPP_only
Becn1	0.35989	0.369088	0.565265	0.90918	0.342946	0.0838015	0.338892	0.287271	0.221592	0.381265	0.379251	0.341636	0.621911	0.285017	0.261892	0.343282	0.4182	0.563756	0.396107	0.375881	0.309112	0.261297	0.387117	0.400366	0.151724	0.989372	0.383405	0.42507	0.317746	0.284318	0.382164	0.325488	0.371175	0.372768	0.391299	0.350391	0.321791	MPP_only
Bex3	1.25094	1.10411	0.619887	0.401521	1.32392	0.768956	0.970638	1.01397	0.948703	1.11192	0.933919	1.31622	0.596747	0.979921	0.969712	1.15989	1.24913	0	1.39636	0.911832	1.02332	1.10535	1.0914	1.06002	0.967827	0.612356	1.31646	0.960186	1.00398	1.02306	1.00823	0.945009	0.993386	1.22677	0.660963	0.90392	0.929306	MPP_only
Bex4	0.183524	0.0699862	0	0.401521	0.178092	0	0.0372475	0.217712	0.557275	0.102956	0	0.137016	0	0.0625614	0.228571	0.142764	0.0778749	0	0.237535	0.0209938	0.0972394	0.4776	0.133236	0.0927413	0.199301	0	0.16901	0	0.0452937	0.261102	0.101811	0.132523	0.100464	0.169392	0	0.0507694	0.279359	MPP_only
Bex6	0.137457	0.555921	0.209267	0	0.478596	0.375459	0.355395	0.0664273	0.423562	0.490553	0.921783	0.499154	1.20102	0.450827	0.0703306	0.104146	0.219004	0	0.190814	0.109015	0.271292	0.00749754	0.138072	0.540998	0.340549	0.612356	0.480318	0.61129	0.450528	0.0715165	0.507651	0.319689	0.502706	0.508559	0.188248	0.422737	0.0468833	MPP_only
Bfar	0.672406	0.461024	0	0	0.362384	0.752041	0.466029	0.478459	0.599014	0.460808	1.13495	0.36886	0.38257	0.548291	0.460543	0.39614	0.376922	0	0.305858	0.423241	0.491263	0.444532	0.249045	0.481471	0.527316	0.818528	0.357059	0.651753	0.522385	0.497552	0.488706	0.506528	0.436596	0.427075	0.480657	0.472026	0.530722	MPP_only
Bin1	0.143572	0.352027	0.500043	0	0.389377	0.597219	0.32494	0.114037	0.210111	0.372271	0.379251	0.464242	1.35657	0.53774	0.189202	0.38124	0.401373	0	0.402219	0.585871	0.544124	0.118394	0.393233	0.400447	0.18009	0.818528	0.460999	0.465215	0.48609	0.164589	0.429564	0.338613	0.435587	0.471467	0.600505	0.477997	0.188109	MPP_only
Birc5	0	1.71517	0	1.93574	0.773898	1.19483	0.0255541	0.0367696	0.110198	1.75512	0	0.802843	0	0.0306883	0.0167527	0.0431152	1.4791	0	0.828498	0.589454	0	0.0457522	0	1.73675	0.232991	1.87042	0.746209	0.744742	0.0219886	0.0299616	1.65721	0.139701	1.49427	0.703771	0.461458	0.0277066	0.0434447	MPP_only
Blm	0.251759	0.304456	0	0.687225	0.335134	0.318982	0.0965554	0.0573003	0.212695	0.221131	0	0.312246	0	0.0756261	0.0404868	0.10432	0.328387	0	0.349381	0.321778	0.051479	0.0590545	0	0.270055	0.153411	0	0.292892	0.183278	0.0723132	0.0460269	0.348242	0.109964	0.320975	0.358661	0.27285	0.0811688	0.0588937	MPP_only
Blvrb	0.289583	0.240593	0.256861	0	0.299221	0.128651	0.195785	0.335343	0.373509	0.296631	0	0.3094	0.227015	0.238969	0.448566	0.230847	0.255705	0	0.330045	0.210503	0.140239	0.349363	0.311803	0.259772	0.715655	0	0.279335	0.0769661	0.254249	0.295749	0.21997	0.243016	0.258545	0.29465	0.176661	0.201995	0.320489	MPP_only
Bnip2	0.238513	0.580137	0.358656	0.687225	0.538044	0.77953	0.465981	0.432259	0.273655	0.587609	0.720752	0.529937	0	0.408378	0.473503	0.370047	0.408777	0.32109	0.410066	0.330992	0.332015	0.435347	0	0.566799	0.334157	0.612356	0.478491	0.651546	0.446341	0.495841	0.631603	0.500708	0.6301	0.536389	0.508393	0.525256	0.471248	MPP_only
Brat1	0.149789	0.0684579	0	0	0.0616815	0.0402551	0.0621826	0.0711432	0.0668688	0.0500088	0	0.0370591	0	0.0511222	0.0783784	0.0333449	0.0336496	0	0.0420824	0.0281805	0.040028	0.0450196	0	0.0399433	0	0	0.0556266	0.0768278	0.0628464	0.0665324	0.0800491	0.0277552	0.0330759	0.0715663	0.0562084	0.0672273	0.0472388	MPP_only
Brms1l	0.0810236	0.0882956	0.0783793	0	0.128788	0.0384008	0.0869543	0.0893491	0	0.0939225	0.341502	0.0929584	0	0.0976125	0.0809211	0.0375163	0.066639	0	0.0871327	0.0183446	0.0262738	0.0432174	0	0.0840425	0	0.352336	0.115992	0.0768278	0.0571481	0.0729388	0.127886	0.0699407	0.104562	0.135053	0.107966	0.0794438	0.0397725	MPP_only
Brpf1	0.033547	0.16431	0	0.401521	0.18362	0.217385	0.15374	0.134971	0	0.106936	0	0.130225	0	0.102057	0.105932	0.12941	0.156513	0	0.213163	0.150507	0.0775855	0.130357	0.249045	0.146903	0.156365	0	0.128433	0.172816	0.105446	0.101301	0.142025	0.133977	0.192994	0.194112	0.178756	0.106238	0.112792	MPP_only
Bsn	0.033547	0.137177	0.209267	0.401521	0.189037	0.18867	0.185042	0.0754062	0.260384	0.094573	0	0.154307	0	0.0859803	0.0969322	0.0511985	0.0389216	0	0.0483296	0.0195997	0.152788	0.0271508	0.150789	0.0954247	0.120928	0.352336	0.160458	0	0.117287	0.063495	0.086798	0.0457476	0.0441342	0.127857	0.048442	0.106106	0.0409014	MPP_only
Bst2	0.789581	0.93809	1.86822	1.49485	0.945519	1.09916	1.00993	0.859137	0.972062	0.782472	2.17288	0.936592	1.11379	0.924366	0.784439	0.769443	0.75039	0.758884	0.8247	0.665121	0.931255	0.758026	0.848832	0.797312	1.83937	2.10176	0.933634	0.779714	0.964976	0.78927	0.969236	1.66881	1.69053	1.05128	0.957772	1.0569	1.04292	MPP_only
Btg1	0.588566	0.29528	0	0	0.200981	0.65666	0.255747	0.718572	0.679776	0.438381	0	0.286744	1.38098	0.38622	0.861527	0.702216	0.611888	0	0.363734	1.08266	0.856136	0.800241	0.538155	0.386191	0.585852	0.612356	0.268978	0.516659	0.430457	0.853938	0.50837	0.961955	0.754018	0.336175	0.63611	0.556281	0.871853	MPP_only
Btrc	0.184526	0.129877	0	0.401521	0.151234	0	0.115214	0.141612	0.110198	0.208262	0	0.142413	0	0.1219	0.192109	0.117877	0.128507	0	0.124108	0.0879355	0.113355	0.148296	0.180734	0.182586	0.0470226	0	0.142987	0.116523	0.139709	0.137119	0.164781	0.141555	0.1688	0.140553	0.179613	0.152043	0.15845	MPP_only
C030034L19Rik	0.0810236	0.067546	0	0	0.0488311	0	0.0682177	0.0287727	0.0668688	0.160615	0	0.10895	0	0.241262	0.0862678	0.100608	0.0936849	0	0.0576458	0	0.192577	0.0701457	0.318806	0.199588	0.363211	0.612356	0.100188	0	0.212233	0.117769	0.165339	0.046465	0.0694864	0.122232	0	0.231035	0.0772868	MPP_only
C030037D09Rik	0.112041	0.0598266	0	0	0.0736291	0.0611382	0.0936022	0.0697676	0.318779	0.0798125	0	0.112392	0	0.0928261	0.0864046	0.0360291	0.0453725	0	0.0635411	0.00944432	0	0.0633619	0	0.0780457	0.160854	0.352336	0.0852741	0	0.0799712	0.0983083	0.0738113	0.0677223	0.0537538	0.0813878	0.0191026	0.0631916	0.0933215	MPP_only
C1galt1c1	0.0760195	0.0893167	0	0	0.0920582	0.136062	0.0899575	0.0817593	0.26734	0.122688	0	0.114353	0.621911	0.0793364	0.111633	0.0685302	0.071719	0	0.0563926	0.134865	0.029114	0.0937789	0	0.127375	0.239973	0	0.115783	0.669537	0.0949958	0.0959966	0.115226	0.167045	0.162513	0.109114	0.165419	0.0969663	0.127943	MPP_only
C2cd3	0.264548	0.192724	0	0.401521	0.183452	0.0384008	0.1453	0.133043	0.12391	0.204009	0.379251	0.186219	0	0.142674	0.151583	0.161197	0.296592	0	0.256616	0.144959	0.1703	0.200429	0.138072	0.230591	0.0974002	0	0.212562	0.116523	0.18359	0.172396	0.264363	0.16466	0.262615	0.240759	0.128628	0.209301	0.154071	MPP_only
C330018D20Rik	0	0.059573	0	0	0.0362701	0.14789	0.0467602	0.0369367	0.0668688	0.0681251	0	0.0866786	0	0.0600236	0.0626329	0.0414496	0.0493474	0	0.0453398	0.0324745	0.0909489	0.0227479	0	0.0650775	0.110605	0	0.0540935	0	0.064286	0.0581985	0.115517	0.0539602	0.0569536	0.0615138	0.0191026	0.0664604	0.0824	MPP_only
C87436	0.167129	0.277782	0	0	0.246516	0.141691	0.265033	0.217261	0.439189	0.259318	0	0.293386	0	0.249451	0.291947	0.204336	0.236308	0	0.189053	0.175284	0.236496	0.204105	0.352215	0.312361	0.321551	0	0.262303	0.42499	0.24039	0.253683	0.288087	0.183136	0.200297	0.259426	0.292002	0.278819	0.28839	MPP_only
Cab39	0.236899	0.403468	0.321561	0	0.385611	0.364451	0.342733	0.322228	0.120145	0.377015	0.720752	0.348472	0	0.251322	0.21173	0.32868	0.459482	0.563756	0.379467	0.412355	0.295278	0.348237	0.435113	0.366806	0.165952	0	0.34752	0.387767	0.281168	0.254729	0.386295	0.318832	0.37591	0.3782	0.429951	0.317726	0.296947	MPP_only
Cabin1	0.391384	0.473998	0.499078	0.90918	0.439025	0.391461	0.486638	0.342924	0.221362	0.428881	0.379251	0.357025	0.38257	0.38878	0.388041	0.457864	0.453507	0	0.438062	0.380441	0.444945	0.367908	0.274098	0.354698	0.188796	0.352336	0.334927	0.516578	0.399244	0.33439	0.378167	0.304785	0.338321	0.382922	0.372263	0.392958	0.302936	MPP_only
Cables2	0.143572	0.0981265	0	0	0.127956	0.0668846	0.103872	0.121403	0.0570411	0.0687086	0	0.101864	0	0.0715955	0.104383	0.112503	0.14398	0	0.138327	0.0568055	0.0542701	0.151113	0	0.0857354	0.132557	0	0.11745	0.193489	0.0936919	0.120009	0.117649	0.128032	0.151822	0.125688	0.0155872	0.100184	0.123877	MPP_only
Cacna1a	0.391484	0.155509	0.177517	0.401521	0.215605	0.0916425	0.221567	0.19044	0.353873	0.131847	0	0.25643	0	0.162051	0.171234	0.132747	0.130726	0	0.200285	0.0576486	0.107458	0.0913512	0.469594	0.159966	0.246006	0.352336	0.197703	0.0769661	0.195859	0.172786	0.158639	0.236818	0.195831	0.215372	0.159594	0.218158	0.182487	MPP_only
Cactin	0.325053	0.216809	0	0	0.218743	0.21767	0.183338	0.162869	0.0668688	0.215131	0	0.191588	0.394895	0.115056	0.101917	0.122745	0.0892444	0	0.140743	0.0996457	0.137129	0.0849597	0	0.174543	0.126831	0.352336	0.198275	0.278995	0.141114	0.151541	0.144656	0.108917	0.128005	0.195845	0.121383	0.146185	0.111684	MPP_only
Cacul1	0.214526	0.131434	0.177517	0	0.103892	0.0402551	0.107423	0.117107	0.0999129	0.173195	0.341502	0.117104	0.227015	0.113195	0.105145	0.0979375	0.136501	0.32109	0.101272	0.10172	0.108214	0.0976405	0.350571	0.140823	0.053773	0	0.104727	0.172816	0.109087	0.0901708	0.182504	0.122767	0.159896	0.108848	0.0830302	0.126703	0.166615	MPP_only
Calcrl	0.114571	0.322295	0.900164	0	0.253718	0.108142	0.310536	0.213303	0.195976	0.317886	0.379251	0.217277	0	0.340092	0.265087	0.158217	0.228721	0	0.147244	0.0718181	0.286635	0.163756	0	0.339582	0.189564	0.612356	0.238838	0.368645	0.301484	0.224525	0.404502	0.201196	0.304577	0.296482	0.0696581	0.368291	0.254824	MPP_only
Calu	0.033547	0.316196	0.643644	0.401521	0.328492	0.25064	0.22422	0.266811	0	0.226964	0	0.314873	0	0.189621	0.194619	0.258699	0.310428	0.32109	0.362713	0.300639	0.137187	0.268364	0.218979	0.270741	0.378595	0.818528	0.293083	0.252035	0.20945	0.262683	0.322644	0.245225	0.309654	0.352564	0.328824	0.217179	0.213653	MPP_only
Camk1d	0.157043	0.130671	0	0	0.115532	0.247029	0.135076	0.0537985	0	0.180718	0	0.119737	0.394895	0.134307	0.0824114	0.165511	0.200016	0	0.152808	0.137676	0.13463	0.0530238	0	0.141067	0.149623	0	0.154856	0.475034	0.168123	0.0668041	0.209738	0.125949	0.216692	0.191157	0.155677	0.220474	0.0976942	MPP_only
Camkk2	0.281378	0.483556	0.177517	0.687225	0.465178	0.124422	0.436257	0.405425	0.444691	0.413328	0.379251	0.42819	1.14655	0.43894	0.339697	0.316016	0.358069	0	0.393667	0.251063	0.405005	0.325234	0.133236	0.410581	0.345905	0.352336	0.448547	0.212511	0.45235	0.321781	0.502902	0.340741	0.379543	0.511199	0.218334	0.448322	0.31808	MPP_only
Capn1	0.22831	0.128966	0.178481	0.401521	0.116489	0.185195	0.116857	0.0927983	0.0570411	0.113488	0	0.130234	0.394895	0.190756	0.124403	0.207108	0.227284	0	0.169648	0.287448	0.108526	0.129461	0	0.192133	0.0468307	0	0.155088	0.271244	0.182024	0.115534	0.213839	0.131486	0.166574	0.143892	0.401754	0.20317	0.115343	MPP_only
Capza1	0.395631	0.538443	0.49396	1.09071	0.49731	0.598541	0.466126	0.36388	0.52984	0.544122	0.379251	0.445799	0.227015	0.447415	0.318343	0.454737	0.588483	0	0.596289	0.638135	0.672863	0.245413	0.531305	0.550947	0.368408	0.352336	0.513339	0.69786	0.40104	0.333488	0.6548	0.459882	0.546036	0.537326	0.765421	0.430413	0.364564	MPP_only
Card19	0.72923	0.426086	0.634447	0.401521	0.508194	0.23603	0.489571	0.562046	0.303713	0.62156	0.933919	0.596398	0.99532	0.618753	0.705275	0.891704	0.727841	0	0.749114	0.438757	0.655204	0.743726	0.665904	0.56788	0.444965	0.352336	0.561942	0.471343	0.624277	0.663643	0.534512	0.502441	0.448342	0.545708	0.508974	0.641233	0.637813	MPP_only
Carns1	0	0.0424096	0.177517	0	0.023618	0	0.0291648	0.0250688	0	0.0258051	0	0.0499701	0	0.081049	0.0477173	0.0785835	0.0842503	0	0.0573451	0.0547114	0.0539579	0.0502539	0	0.033615	0.0712945	0.352336	0.0471633	0	0.0708995	0.0619866	0.0516923	0.0414384	0.0171802	0.0445659	0	0.100646	0.0707936	MPP_only
Cbfb	0.324534	0.671	0.634603	0.401521	0.698587	0.766796	0.581285	0.440693	0.26734	0.517839	0.542532	0.528293	0	0.354408	0.360708	0.414818	0.531848	0	0.669482	0.483714	0.501632	0.381111	0.557974	0.540326	0.368219	0.612356	0.549107	0.660194	0.36815	0.321508	0.654605	0.449088	0.619952	0.624421	0.550989	0.394312	0.317131	MPP_only
Cbr4	0.157347	0.097493	0.177517	0	0.0956952	0.0532417	0.0679212	0.0898804	0	0.159331	0	0.124827	0.227015	0.145718	0.126775	0.0837341	0.125745	0	0.0850741	0.0938827	0.0792954	0.093729	0.133236	0.156134	0.156828	0	0.131445	0.0769661	0.130466	0.15593	0.182857	0.090995	0.111963	0.131721	0.0903116	0.137229	0.110797	MPP_only
Cbx8	0	0.0858313	0.321561	0	0.0707373	0.0384008	0.0955413	0.07658	0	0.0967485	0	0.106626	0	0.106799	0.0908511	0.045517	0.0478452	0	0.0266052	0.0131832	0.0351852	0.0200065	0.161014	0.0979905	0.0588521	0	0.0860559	0.0768278	0.117612	0.0847113	0.0685317	0.0185112	0.0170171	0.0644028	0.111839	0.0905195	0.0791941	MPP_only
Cc2d1b	0.154854	0.175096	0	0.401521	0.168349	0.133022	0.131371	0.137382	0.232941	0.195192	0	0.175364	0	0.152326	0.113191	0.16047	0.242669	0.32109	0.244003	0.131576	0.0244795	0.162477	0.133236	0.215897	0.250296	0.352336	0.189285	0.153794	0.146662	0.130914	0.210629	0.148346	0.178055	0.210387	0.134282	0.144968	0.140194	MPP_only
Ccdc127	0.239269	0.265923	0.281556	0	0.337732	0.194368	0.271968	0.276699	0.330696	0.260888	0	0.278512	0	0.21095	0.210368	0.155174	0.19644	0	0.179884	0.117484	0.260611	0.153846	0.373513	0.267312	0.242902	0.352336	0.256893	0.242004	0.206611	0.192195	0.21929	0.189228	0.217021	0.22631	0.181099	0.185804	0.154734	MPP_only
Ccdc18	0	0.280785	0	0.401521	0.0885035	0.0786559	0.0195071	0.0291635	0.157023	0.482022	0	0.124483	0.227015	0.0532952	0.0829032	0.0602301	0.33325	0.563756	0.177961	0.0417475	0.0538426	0.0625479	0	0.445065	0.0927657	0.352336	0.142239	0	0.0515495	0.0677145	0.426243	0.076942	0.360696	0.188928	0.149082	0.0599509	0.0634717	MPP_only
Ccdc186	0.101998	0.140476	0.0783793	0.687225	0.106173	0.30314	0.115359	0.135077	0	0.123089	0	0.0784485	0	0.106257	0.140567	0.078545	0.0853356	0	0.0637097	0.0739219	0.0938607	0.116498	0	0.11367	0.114337	0.352336	0.0819507	0.212511	0.0949206	0.11052	0.110492	0.0772901	0.107914	0.0705102	0.106127	0.112975	0.14686	MPP_only
Ccdc61	0	0.155409	0	0	0.0694301	0.0729278	0.0579476	0.0586418	0.206727	0.297592	0	0.116728	0	0.117297	0.097506	0.0742846	0.165297	0	0.0675337	0.0985493	0.0708399	0.108156	0	0.261523	0.111134	0.352336	0.117559	0.348024	0.106816	0.0989613	0.222704	0.0777061	0.185562	0.119547	0.0725526	0.112016	0.090554	MPP_only
Ccdc85b	0.348457	0.100421	0	0	0.099482	0.0768722	0.122465	0.121298	0.154493	0.0728228	0	0.102193	0	0.0912212	0.0622598	0.136737	0.0932794	0	0.170896	0.0871415	0.0526884	0.184703	0.180734	0.0741746	0.0436273	0	0.0864888	0.172954	0.0816489	0.0765198	0.0834498	0.0468012	0.0328224	0.0805293	0.0865301	0.075798	0.110791	MPP_only
Ccl4	0.457614	0.115159	0.531373	0	0.126581	0.110743	0.214037	0.375397	0.499325	0.204631	0.341502	0.269926	0	0.432555	0.523274	0.600585	0.516482	0	0.405782	0.857475	1.50624	0.48533	0.707267	0.198326	0.554389	0.989372	0.17263	0.116523	0.330398	0.427356	0.474333	2.22814	1.93883	0.47882	0.336963	0.885406	0.740042	MPP_only
Ccl5	0.265306	0.00816063	0.209267	0	0.00913987	0	0.0266261	0.0320594	0	0.0177201	1.09558	0.0247953	0	0.0404024	0.00987611	0.0390097	0.0198699	0	0.0103411	0.0474838	0.111122	0	0	0.024083	0.183311	0	0.0096201	0	0.0520841	0.00912054	0.0319673	0.777003	0.368409	0.0366846	0.0374886	0.0439984	0.0357926	MPP_only
Ccl9	0.294031	0.124761	0.398772	1.59995	0.220817	0.190332	0.249165	0.0684594	0.306699	0.211874	1.7811	0.241217	0.806967	0.350092	0.106515	0.385494	0.270057	0	0.324228	1.43835	0.335584	0.0926918	0.138072	0.249141	0.205425	0	0.260695	0.79109	0.384923	0.0748276	0.319913	0.4119	0.327332	0.302502	0.7666	0.434209	0.116376	MPP_only
Ccna2	0	1.12004	0	1.09071	0.472433	0.712121	0.014004	0.0103063	0.142313	1.15667	0	0.46954	0	0.00909531	0.0109635	0.0233927	0.955636	0	0.463477	0.366014	0	0.0116341	0	1.14221	0.262265	0.818528	0.437587	0.49556	0.0179358	0.00518849	1.18644	0.10595	0.9755	0.466567	0.268216	0.014164	0.0258311	MPP_only
Ccnb1	0	1.04166	0	0.401521	0.117965	0.154635	0.0399441	0.0298279	0	1.02806	0	0.15851	0	0.0494021	0.0204159	0.0247416	0.616773	0	0.143218	0.171717	0.0953121	0.0143411	0	1.0729	0.0304697	0.818528	0.180495	0.272657	0.045963	0.0230881	1.08708	0.0326531	0.755493	0.151429	0.197126	0.0362959	0.0245987	MPP_only
Ccnb2	0	1.23535	0	0.687225	0.138807	0.489727	0.0207678	0.0441181	0	1.50064	0	0.21831	0.394895	0.0542056	0.0411503	0.0524536	1.35642	0	0.313164	0.437876	0.0543853	0.0221739	0	1.48956	0.0668427	1.13524	0.234218	0.45299	0.0356144	0.0357134	1.40719	0.0572287	1.10041	0.205509	0.350628	0.0534046	0.0363792	MPP_only
Ccnd2	1.37549	0.934198	1.3441	0.687225	1.17083	0.638768	1.29156	1.26481	1.38558	0.732625	0.964229	1.0437	1.44103	1.07563	1.23589	1.06471	0.658521	0.32109	0.862291	0.515733	1.1924	1.28134	0.943599	0.693398	1.51745	2.24577	0.943546	0.663055	1.07298	1.17696	1.04253	1.9616	1.53495	1.32307	0.806085	1.50448	1.5464	MPP_only
Ccnd3	0.936083	1.0152	0.562159	1.24429	1.09652	1.18988	0.912486	0.97669	0.724488	0.767984	0.741395	0.888208	1.14655	0.686095	0.846456	0.835303	0.824864	0	0.960401	0.889633	0.771206	1.05592	0.684652	0.737252	0.928807	0.612356	0.898171	1.0364	0.671697	0.872916	0.762386	0.937186	0.919612	0.831999	0.964716	0.820705	0.89905	MPP_only
Ccnf	0.033547	0.458408	0	0.401521	0.142618	0.397085	0.0365975	0.0154109	0	0.525095	0	0.160489	0.227015	0.0281503	0.00855752	0.0152936	0.146508	0	0.0720115	0.0526869	0.0232394	0.00646603	0	0.505596	0.036373	0.818528	0.1622	0.116523	0.0319057	0.0209704	0.50401	0.0220234	0.259258	0.165425	0.0427446	0.0270352	0.0196267	MPP_only
Ccng2	0.154854	0.144253	0	0.401521	0.0196838	0.308636	0.0389216	0.0580984	0.220058	0.440164	0	0.0998614	0	0.132412	0.169802	0.134738	0.305366	0	0.101133	0.190417	0.114089	0.103554	0.161014	0.49252	0.0934443	0.989372	0.107977	0.116523	0.180288	0.174585	0.452581	0.0781913	0.191347	0.104942	0.178455	0.15956	0.186241	MPP_only
Ccnt2	0	0.305744	0.561833	0.401521	0.290636	0.378874	0.25872	0.248527	0.214025	0.291968	0.341502	0.279478	0.50104	0.273028	0.222679	0.187157	0.203012	0	0.17002	0.142007	0.32501	0.143698	0	0.323388	0.226904	0.612356	0.26065	0.42507	0.273575	0.227034	0.323779	0.20953	0.277798	0.287915	0.23033	0.300106	0.273445	MPP_only
Ccny	0.12152	0.204259	0	0.687225	0.224476	0.131422	0.188417	0.202808	0.0974522	0.13683	0	0.147994	0.38257	0.171152	0.154248	0.189705	0.198773	0.563756	0.200589	0.197821	0.186944	0.237966	0.311803	0.163279	0.148998	0	0.189542	0.358527	0.164727	0.17716	0.182165	0.184196	0.163531	0.207865	0.284268	0.172022	0.160094	MPP_only
Ccsap	0.0675525	0.104784	0	0	0.0489418	0.162787	0.0181598	0.0148274	0	0.152404	0	0.0503743	0	0.00768343	0.0149432	0.0567425	0.115978	0	0.0946259	0.0770464	0	0.0353623	0	0.109055	0.0304697	0	0.059424	0.332554	0.0289681	0.0204966	0.135999	0.0173753	0.0525482	0.0292082	0.0485654	0.0234164	0.0145534	MPP_only
Cct2	1.29562	1.6929	1.49432	1.78187	1.74585	1.46051	1.59967	1.54028	1.25738	1.51859	1.42692	1.64714	1.60813	1.42107	1.32255	1.48711	1.55698	0.563756	1.68309	1.54667	1.48545	1.33733	1.46952	1.5376	1.37871	1.37541	1.60297	1.79964	1.44054	1.31885	1.50558	1.48811	1.56873	1.59635	1.47657	1.39353	1.26243	MPP_only
Cd164	0.394936	0.366629	0.399941	0	0.374529	0.219011	0.324922	0.327206	0.199027	0.390015	0.720752	0.335722	0.621911	0.377097	0.27551	0.394774	0.479287	0.32109	0.449549	0.374165	0.355653	0.376581	0.452042	0.438438	0.404672	0.352336	0.373334	0.42499	0.314237	0.271641	0.430379	0.456979	0.489227	0.376523	0.587989	0.420471	0.343268	MPP_only
Cd180	0	0.107793	0	0	0.0576678	0.461383	0.0480067	0.0108592	0	0.153115	0	0.0900898	0.394895	0.109258	0.0157273	0.0288629	0.0609978	0	0.0411237	0.0776107	0.0758043	0.0171776	0	0.124828	0.0668427	0	0.126904	0	0.11882	0.0254148	0.160915	0.0220982	0.0817408	0.132458	0.065032	0.0856438	0.0126831	MPP_only
Cd274	0	0.0883491	0.137962	0.401521	0.0859838	0	0.150568	0.150729	0.12391	0.0868755	0	0.0806137	0	0.109394	0.16601	0.279774	0.185118	0	0.186576	0.280199	0.171793	0.212361	0.138072	0.0802127	0.132263	0.352336	0.0656689	0.0769661	0.10556	0.137045	0.221816	1.15266	0.857174	0.21406	0.192172	0.287676	0.486233	MPP_only
Cd34	1.75221	1.73691	1.51438	1.78187	1.68146	0.776692	1.81998	1.17373	1.51999	1.87532	1.53797	1.75171	1.42806	1.97814	1.34404	1.87917	1.89093	0	1.71364	1.10103	2.00124	0.938391	1.85695	1.85753	1.75239	1.37541	1.76436	1.48124	2.04582	1.30089	1.85728	1.46906	1.59643	1.7413	0.818309	1.96537	1.17875	MPP_only
Cd47	1.63843	2.07106	1.84892	1.93574	1.89574	1.81719	1.98127	1.7858	2.19405	2.06885	2.39038	1.99111	2.15425	2.14931	1.85655	1.86407	2.07828	0.563756	1.90003	2.00995	1.86165	1.69738	1.80427	2.13286	2.0371	2.75897	1.94607	1.87791	2.06875	1.82642	2.20108	2.14021	2.30109	2.0212	2.05663	2.15219	1.88959	MPP_only
Cd48	0.321481	0.897256	0.537452	1.24429	0.992123	1.28749	0.792415	0.106313	0.0668688	0.715599	1.6526	0.848464	2.07596	0.673633	0.109411	0.317431	0.482456	0.32109	0.598689	0.721758	0.721163	0.0173999	0.274098	0.740962	0.460768	0.612356	0.841676	1.23783	0.670873	0.0951114	0.710243	0.54638	0.827079	0.903137	1.08458	0.679654	0.0773574	MPP_only
Cd68	0.068451	0.0364384	0.0783793	0	0.104171	0.552737	0.0588778	0.0490913	0.147195	0.0134296	0	0.117132	0.394895	0.0723647	0.0490234	0.0620403	0.053134	0	0.0888577	0.0888724	0.027007	0.0453295	0	0.0479006	0.0468307	0	0.107054	0.172954	0.0771275	0.0732201	0.0407497	0.0791157	0.0600722	0.12375	0.136271	0.0558013	0.0667486	MPP_only
Cd69	0.149789	0.286464	0.603117	0	0.351323	0.0780734	0.286133	0.183791	0.215942	0.522933	0	0.516705	0.777465	0.517158	0.261785	0.486601	0.585172	0.32109	0.318627	1.04718	0.700432	0.25463	0	0.473795	1.21357	1.65324	0.512289	0.374158	0.459546	0.327953	1.01527	2.75928	2.81183	0.999043	1.03318	1.10471	0.583551	MPP_only
Cd9	0.257294	0.514619	0.256861	0	0.240881	0.959069	0.208945	0.51652	0.523869	0.716095	0.933919	0.368873	1.20186	0.340915	0.627388	0.357284	0.502359	0	0.336428	1.00522	0.273095	0.650051	0.518159	0.584003	0.246303	0.352336	0.272287	0.698207	0.273351	0.618862	0.611812	0.345337	0.407256	0.246274	1.09079	0.284195	0.581697	MPP_only
Cd93	0.339052	0.506816	0.209267	0.401521	0.325065	0.215471	0.307385	0.244163	0.427708	0.809584	0.592418	0.526728	0	0.627364	0.460429	0.790873	0.931405	0.32109	0.641636	0.35827	0.693389	0.326956	0.56058	0.854457	0.365664	0.352336	0.555603	0.717913	0.635893	0.463479	0.930806	0.331686	0.629999	0.628891	0.371382	0.741397	0.497568	MPP_only
Cdadc1	0.195477	0.198932	0.177517	0.401521	0.179711	0.0986423	0.196697	0.195652	0.347191	0.222721	0	0.188568	0	0.200006	0.126959	0.241515	0.287512	0	0.205652	0.329202	0.117022	0.23521	0.133236	0.2042	0.266651	0.352336	0.18042	0	0.181514	0.170579	0.265555	0.179351	0.192002	0.205759	0.310023	0.175421	0.234811	MPP_only
Cdc25c	0	0.248377	0	0	0.0209297	0.0402551	0.00392694	0.00486996	0	0.365065	0	0.0401637	0	0.00510345	0	0.000750362	0.241951	0	0.0367305	0.0443872	0	0.00487514	0	0.304569	0.036373	0.612356	0.0277566	0	0.00146097	0	0.342616	0.00498332	0.217614	0.0343038	0.0147965	0	0.00771264	MPP_only
Cdca2	0.134642	0.61323	0.0783793	0	0.23597	0.287434	0.0555894	0.0343005	0.214084	0.695495	0	0.291611	0.227015	0.0447058	0.0518297	0.0352934	0.335078	0	0.170287	0.130893	0.0189105	0.0148492	0.133236	0.696176	0.126683	0.989372	0.279033	0.0769661	0.052156	0.0272776	0.7773	0.0545994	0.443778	0.266314	0.119523	0.0437172	0.029039	MPP_only
Cdca3	0	1.05128	0	0.687225	0.337017	0.806242	0.0204714	0.0247431	0	1.21619	0	0.461045	0.61275	0.0342694	0.0128721	0.0283262	1.09258	0	0.499399	0.451817	0	0	0	1.27564	0.144031	1.13524	0.447415	0.710318	0.0244072	0.0226843	1.15306	0.077138	0.974045	0.404724	0.249495	0.0358339	0.016292	MPP_only
Cdca5	0	0.477799	0	0.401521	0.400437	0.421451	0.0351851	0.0159849	0.0570411	0.56166	0	0.394111	0	0.0387631	0.0162143	0.0362328	0.467326	0	0.445403	0.177947	0.0583379	0.0236322	0	0.600337	0.036373	0.612356	0.411013	0.272657	0.0412943	0.0142997	0.531585	0.0945448	0.436861	0.367496	0.100761	0.0187167	0.0184316	MPP_only
Cdca8	0.033547	1.61863	0	1.69504	0.633976	0.963067	0.043393	0.0289913	0.345756	1.67464	0	0.711442	0.394895	0.0492466	0.0396489	0.0675362	1.43602	0	0.677593	0.475168	0.0193091	0.0369417	0	1.67488	0.130152	2.10176	0.657724	0.710899	0.0463181	0.0433504	1.58128	0.143589	1.37345	0.601125	0.408929	0.0518256	0.0628582	MPP_only
Cdk20	0	0.0445697	0	0	0.0497266	0	0.045416	0.0349353	0.0999129	0.0494034	0	0.0280855	0	0.0276424	0.0382311	0.0111586	0.0148623	0	0.0160009	0.00723481	0.0234904	0.0278857	0	0.0286342	0.0304697	0	0.0368161	0	0.0526174	0.0291235	0.0233243	0.0182616	0.0157374	0.04083	0.052723	0.0381554	0.0245227	MPP_only
Cdk6	1.10444	1.57261	0.916437	0.401521	1.43754	0.684525	1.42908	0.925221	0.747232	1.37352	1.70562	1.24042	0.50104	1.1649	0.675857	1.1369	1.46482	0	1.4291	1.29876	1.2243	0.543724	1.22577	1.48673	0.875113	1.65324	1.32111	1.00977	1.10801	0.62964	1.61719	1.34713	1.64286	1.57735	1.23844	1.27401	0.80308	MPP_only
Cdkn1b	0.405401	0.366574	0.178481	0	0.151649	0.395296	0.260207	0.322253	0.0974522	0.54696	0	0.26299	0.227015	0.397511	0.400245	0.352105	0.403164	0	0.273344	0.25067	0.491368	0.442751	0.161014	0.475176	0.215186	0	0.207524	0.272657	0.352813	0.328302	0.443126	0.139936	0.160266	0.180394	0.23084	0.302759	0.369499	MPP_only
Cdkn2aipnl	0.249558	0.380381	0.209267	0	0.341461	0.283692	0.220685	0.205697	0.197365	0.38589	0	0.303909	0	0.226419	0.239707	0.279117	0.435703	0	0.41712	0.314753	0.210759	0.202864	0.133236	0.411238	0.32634	0.612356	0.383349	0.183278	0.243072	0.237536	0.381821	0.220341	0.357675	0.374196	0.263656	0.250928	0.180338	MPP_only
Cdkn2c	0	0.31986	0	0	0.115735	0.532502	0.0460055	0.0221558	0	0.42213	0	0.186049	0	0.0888591	0.0494273	0.0852769	0.278504	0.32109	0.198542	0.261651	0.0893068	0.0338513	0.133236	0.486684	0.0304697	0.612356	0.177922	0.255726	0.0733686	0.0884002	0.446017	0.0502772	0.248042	0.18622	0.124028	0.0725455	0.0638584	MPP_only
Cdkn3	0	0.532278	0	0	0.0268775	0.352829	0.00594185	0.00931516	0	0.736449	0	0.0643625	0.394895	0.011154	0.0032109	0.00736997	0.445473	0	0.0423104	0.109955	0.0211925	0.00487514	0	0.711441	0	0.989372	0.0618203	0.404054	0.00196802	0.00592703	0.622233	0.0114025	0.494986	0.0500183	0.191745	0.0130943	0.0105307	MPP_only
Cenpc1	0.101099	0.472418	0	0	0.189085	0.296145	0.137468	0.148206	0.263768	0.57574	0	0.239674	0.50104	0.170311	0.153795	0.123985	0.354437	0	0.189655	0.113987	0.129036	0.174479	0	0.544376	0.0740969	0.612356	0.261785	0.116523	0.121031	0.142777	0.571847	0.11237	0.383589	0.242751	0.171616	0.163451	0.154598	MPP_only
Cenpe	0.166807	0.978466	0	0	0.164165	0.490794	0.0347423	0.0620233	0	1.1289	0	0.21948	0	0.107779	0.0657329	0.0499912	0.667162	0	0.210106	0.287156	0.101836	0.0434583	0	1.15859	0.128281	1.65324	0.25819	0.400088	0.0780547	0.0744826	1.21218	0.118754	1.05932	0.285619	0.236449	0.104475	0.0370235	MPP_only
Cenpf	0	1.64174	0	0.687225	0.27429	0.377689	0.0335456	0.0482674	0	1.73874	0	0.400266	0	0.0498415	0.027095	0.0459581	1.28498	0	0.344788	0.309187	0	0.0185977	0	1.78409	0.0304697	1.65324	0.325127	0	0.0339279	0.0318167	1.7543	0.0870476	1.24129	0.328838	0.276038	0.078232	0.0490152	MPP_only
Cenpl	0	0.302818	0	0.401521	0.0801019	0.308003	0.0259249	0.034986	0	0.479774	0	0.134417	0	0.0584068	0.0593825	0.026322	0.171447	0	0.0914761	0.153524	0.0841992	0.0681687	0	0.504929	0	0.989372	0.138204	0.212511	0.0428544	0.0830736	0.488654	0.0699701	0.304885	0.13566	0.056265	0.0460358	0.0623152	MPP_only
Cep128	0.139646	0.300243	0	0	0.242864	0.176317	0.0647807	0.0654834	0.0668688	0.364857	0	0.269281	0	0.0483991	0.0629177	0.0597296	0.27219	0	0.242242	0.17541	0.0223967	0.0280163	0	0.326636	0.106514	0.352336	0.22028	0.135731	0.0673931	0.0694754	0.376594	0.0903565	0.286292	0.253576	0.222418	0.0696154	0.0716313	MPP_only
Cep70	0.137331	0.294005	0	0	0.146663	0.140605	0.172867	0.136038	0	0.361039	0	0.211247	0.227015	0.178804	0.207354	0.145365	0.25996	0	0.135105	0.082603	0.217834	0.151057	0	0.349956	0.208475	1.13524	0.160918	0	0.178847	0.142307	0.329822	0.126267	0.226894	0.165563	0.079942	0.1911	0.1987	MPP_only
Cep89	0.0709541	0.272725	0	0	0.0820157	0.0454007	0.0656848	0.0669211	0	0.347652	0	0.0833823	0	0.0669487	0.0827726	0.0527139	0.19425	0	0.0493403	0.0631896	0.0545712	0.0691245	0	0.316687	0.0304697	0	0.0692749	0.0768278	0.0676356	0.0630781	0.318751	0.0515972	0.190791	0.0858202	0.0695385	0.0735723	0.0555911	MPP_only
Cep95	0.193405	0.0786719	0	0	0.0819069	0.223152	0.0712402	0.0761676	0	0.119785	0	0.0817626	0	0.094286	0.0989313	0.0467249	0.0741063	0	0.0667207	0.0486982	0	0.0583356	0.387117	0.13456	0.0979763	0	0.0978333	0.0959884	0.0948946	0.0689474	0.145259	0.0637086	0.101497	0.0878734	0.0428846	0.101194	0.0814451	MPP_only
Cfap20	0.373189	0.456415	0.209267	0.687225	0.520715	0.178936	0.398148	0.370361	0.306264	0.586628	0.379251	0.545187	0.38257	0.426639	0.382338	0.339347	0.47345	0	0.444378	0.362708	0.282646	0.303613	0.41651	0.567791	0.47579	0.989372	0.558832	0.435493	0.390071	0.444435	0.502882	0.360142	0.482238	0.5332	0.390249	0.378517	0.353768	MPP_only
Cfap97	0.275133	0.357194	0.355998	0.687225	0.308748	0.427124	0.281725	0.276207	0.233205	0.328346	0.720752	0.346811	0	0.349	0.3043	0.225022	0.249066	0	0.192936	0.102344	0.302447	0.275897	0.161014	0.351118	0.340793	0	0.299256	0.289477	0.335262	0.328881	0.343857	0.238221	0.320021	0.291745	0.199821	0.342852	0.392514	MPP_only
Cflar	0.325903	0.344189	0.63704	0.687225	0.219567	0.303248	0.312828	0.367301	0.461164	0.407284	0	0.237816	1.11379	0.345791	0.323116	0.255058	0.320954	0.563756	0.183184	0.276281	0.230469	0.308159	0.294251	0.474977	0.329561	0	0.265923	0.252035	0.357492	0.272954	0.51373	0.404095	0.443986	0.23877	0.223507	0.383889	0.383249	MPP_only
Cggbp1	0.748518	0.589987	0.177517	0	0.548502	0.71144	0.512063	0.501978	0.357801	0.689306	0.741395	0.526752	0	0.460216	0.569675	0.43776	0.54736	0	0.52561	0.52176	0.343226	0.48897	0.583111	0.605493	0.498239	0.818528	0.553738	0.231719	0.512896	0.582619	0.676191	0.664465	0.631276	0.583843	0.555066	0.507715	0.588564	MPP_only
Chchd2	2.30109	2.27942	2.1739	2.18667	2.31498	2.09211	2.1323	2.14136	1.88616	2.23826	2.3008	2.28811	2.02657	2.07038	2.06386	1.92819	2.05353	1.06235	2.06193	2.01159	1.94631	1.80406	2.33159	2.24904	1.99202	2.28951	2.26499	2.4373	2.07924	2.04612	2.18178	2.02709	2.14166	2.25584	2.24887	2.04483	1.89231	MPP_only
Chchd5	0.192474	0.2336	0.178481	0	0.121236	0.154946	0.129726	0.160538	0.0668688	0.262499	0	0.195118	0.38257	0.23084	0.207428	0.161138	0.21704	0	0.150916	0.155686	0.213344	0.180638	0.295231	0.257393	0.166574	0.352336	0.195044	0.212479	0.223737	0.228554	0.266776	0.117374	0.169317	0.172612	0.286187	0.210098	0.192313	MPP_only
Chd1l	0.0709541	0.191413	0.178481	0	0.198401	0.319538	0.156251	0.121535	0.240483	0.28223	0.379251	0.185476	0	0.1154	0.164185	0.21019	0.249353	0	0.240589	0.138477	0.159289	0.122572	0.133236	0.19661	0.293808	0	0.217042	0.0959884	0.132772	0.127687	0.223119	0.137401	0.184433	0.244949	0.136598	0.121709	0.125496	MPP_only
Chd9	0.451961	0.535103	0.177517	0.401521	0.441889	0.375586	0.449074	0.463954	0.371038	0.612826	0	0.458107	0.38257	0.561244	0.538046	0.336549	0.474429	0	0.322907	0.238357	0.514721	0.456199	0.318806	0.626174	0.390255	0.352336	0.420258	0.366305	0.513447	0.497726	0.609228	0.29713	0.360419	0.453858	0.283596	0.501382	0.536262	MPP_only
Chek1	0.230846	0.131785	0	0.401521	0.396569	0.217325	0.146659	0.0731954	0	0.150486	0	0.355668	0.621911	0.0966552	0.0514619	0.0594118	0.11098	0	0.229409	0.0792889	0.0491763	0.0426139	0.218979	0.149255	0.0609687	0	0.315181	0.172816	0.0812054	0.0315642	0.153361	0.142077	0.192895	0.346484	0.263824	0.073996	0.0340726	MPP_only
Chmp3	0.109566	0.323852	0.565265	0.401521	0.314667	0.33301	0.241588	0.283781	0.254406	0.340009	0	0.322128	1.38098	0.286917	0.307568	0.220203	0.311123	0	0.293987	0.325263	0.359562	0.127623	0	0.385231	0.159292	0.989372	0.306046	0.135731	0.305263	0.317716	0.340259	0.267533	0.353596	0.278979	0.339994	0.31628	0.266624	MPP_only
Chst11	0	0.0989413	0.0783793	0	0.0855471	0.244614	0.0867103	0.091704	0.251453	0.083747	0	0.0766962	0	0.0696436	0.0914849	0.147818	0.148708	0	0.115209	0.159006	0.0977903	0.0821268	0.161014	0.077746	0.0436273	0	0.0902375	0.0768278	0.0835619	0.0854307	0.142973	0.139435	0.153653	0.0909669	0.107886	0.114237	0.0949407	MPP_only
Ciao1	0.23708	0.234289	0.177517	0.687225	0.216668	0.320448	0.190822	0.223846	0.241694	0.273253	0.341502	0.268434	0	0.211079	0.194425	0.145402	0.185529	0	0.183376	0.182901	0.207761	0.103779	0.452042	0.228468	0.271252	0	0.244041	0.348242	0.251882	0.179767	0.255013	0.169509	0.223886	0.272187	0.271892	0.202943	0.229723	MPP_only
Cit	0.0675525	0.5488	0	0	0.26709	0.543537	0.0329179	0.0209632	0	0.688887	0	0.313314	0	0.0287755	0.0210393	0.0378937	0.531725	0	0.258642	0.112157	0	0.0319868	0.138072	0.66087	0.036373	1.13524	0.3221	0.344614	0.0403105	0.0189785	0.696112	0.067504	0.508968	0.334953	0.199683	0.0569257	0.0238345	MPP_only
Ckap2	0.033547	0.54438	0	0.401521	0.176518	0.225123	0.068868	0.0507248	0	0.683181	0	0.220058	0	0.0773628	0.0362708	0.0441566	0.430646	0	0.160282	0.140229	0.029114	0.0130896	0	0.677424	0.036373	0.612356	0.198523	0	0.04407	0.0374367	0.696444	0.0679457	0.457298	0.20406	0.101796	0.0499366	0.0501829	MPP_only
Ckap2l	0	0.697847	0	0	0.175459	0.25115	0.0108859	0.00828733	0.142313	0.861925	0	0.294591	0	0.013066	0.0109089	0.0239512	0.572788	0	0.251901	0.0875345	0.0313042	0	0	0.852109	0.0304697	0.612356	0.248443	0.116523	0.0125407	0.0162439	0.866491	0.0322835	0.549244	0.240463	0.180076	0.00690941	0.0123899	MPP_only
Ckap4	0.616188	0.407254	0.939139	0	0.449832	0.304565	0.518275	0.366952	0.391211	0.286758	0	0.382878	0	0.385169	0.22432	0.219739	0.206334	0.32109	0.218934	0.253485	0.456385	0.155077	0.133236	0.224664	0.306795	0	0.379547	0.531302	0.360341	0.209503	0.273016	0.212619	0.17227	0.364445	0.413614	0.336306	0.165371	MPP_only
Ckap5	0.223125	0.927211	0	0	0.324703	0.487422	0.187056	0.262902	0.244648	1.05586	0.379251	0.334614	0	0.209915	0.206887	0.18993	0.791171	0	0.356394	0.199537	0.266344	0.20571	0.133236	1.0006	0.373201	1.13524	0.335047	0.193351	0.163	0.204038	0.994302	0.213586	0.77908	0.31274	0.240897	0.186228	0.216828	MPP_only
Clasrp	0.160748	0.1493	0	0.401521	0.168847	0.0729278	0.119541	0.153879	0	0.142735	0.68552	0.169741	0.394895	0.122161	0.15879	0.198139	0.194745	0	0.175401	0.178155	0.09001	0.178411	0.150789	0.153831	0.112586	0	0.146623	0.0769661	0.147843	0.135744	0.140355	0.131207	0.17096	0.160411	0.159298	0.17239	0.156602	MPP_only
Clcf1	0.068451	0.0706841	0	0	0.0748327	0	0.0956864	0.0711222	0.0901543	0.0753851	0	0.0573435	0	0.084671	0.0749809	0.130188	0.217907	0	0.129182	0.0258219	0.0493955	0.0466999	0	0.125505	0	0	0.0731828	0	0.129066	0.06807	0.0825247	0.0411066	0.0349821	0.0758241	0.0364606	0.108072	0.0519383	MPP_only
Clec12a	0.033547	0.303819	0	0	0.155556	0.743264	0.096467	0.00282789	0.173673	0.361812	0	0.206826	0.61275	0.113528	0.0277733	0.116684	0.367496	0	0.158606	1.00221	0.141595	0.0146612	0	0.463791	0.138583	0.989372	0.227023	1.42593	0.156076	0.0235912	0.32091	0.0995108	0.335887	0.269968	1.60347	0.117839	0.00930017	MPP_only
Clec4d	0	0.0391431	0.177517	0.401521	0.0866503	0.0532417	0.0501298	0.0274833	0	0.05306	0	0.0584867	0	0.0503656	0.0535774	0.119999	0.0619343	0	0.152425	0.147194	0.122119	0.0563411	0	0.0504768	0.0468307	0	0.0661061	0.0769661	0.0715843	0.0531854	0.0437998	0.0737436	0.0398806	0.0882692	0.0191026	0.0699964	0.0290138	MPP_only
Clec4e	0.0788348	0.113789	0.355998	0	0.148398	0.0780734	0.130296	0.0696533	0.0901543	0.127645	0	0.139399	0	0.104492	0.0633763	0.196199	0.159992	0	0.287586	0.358408	0.161549	0.113732	0.212499	0.123309	0	0	0.134502	0	0.146602	0.0684491	0.166228	0.125263	0.149538	0.193823	0.0310192	0.161922	0.10725	MPP_only
Clptm1	0.142053	0.309399	0.358656	0.401521	0.329564	0.453132	0.245619	0.231468	0.116573	0.281273	0.720752	0.31536	0	0.254112	0.240763	0.248626	0.339125	0	0.410887	0.224447	0.21704	0.262992	0.138072	0.287858	0.403701	0	0.315852	0.300688	0.246756	0.220552	0.259643	0.272527	0.376306	0.31626	0.33283	0.238556	0.201259	MPP_only
Cmpk2	0	0.0401884	0.495318	0	0.0330911	0.176849	0.0400707	0.0509178	0	0.0837107	0	0.03883	0	0.130904	0.119038	0.0446257	0.0523142	0	0.0437694	0.0103611	0.0824111	0.0507139	0.150789	0.0739439	0.785403	1.26252	0.0659998	0	0.0830789	0.115222	0.503354	1.77318	1.5788	0.474063	0.392878	0.599346	0.778113	MPP_only
Cnn3	0.0675525	0.179209	0	0	0.165948	0.078173	0.149509	0.0295465	0.214025	0.203605	0.379251	0.158226	0	0.225001	0.0220166	0.267404	0.393021	0	0.261262	0.105931	0.296806	0.164077	0	0.236244	0.0304697	0	0.21164	0.279266	0.178415	0.0272711	0.252456	0.081093	0.245582	0.28086	0.0728764	0.196331	0.0297733	MPP_only
Cnnm2	0	0.0220038	0	0	0.0135243	0.0611382	0.0146392	0.0257325	0	0.0475287	0	0.0308961	0	0.020006	0.0231934	0.159646	0.19033	0	0.145401	0.164849	0.144586	0.078858	0	0.051599	0.0739814	0	0.0186251	0.0768278	0.031003	0.0244171	0.0372088	0.021072	0.0337439	0.0277438	0.0624096	0.0212518	0.0221405	MPP_only
Cnot1	0.372015	0.552684	0	0.401521	0.507835	0.333567	0.442607	0.454625	0.507785	0.580804	0.720752	0.447583	0.621911	0.402675	0.386165	0.464667	0.668364	0	0.579919	0.435858	0.305742	0.452414	0.763845	0.599818	0.483645	0.352336	0.446837	0.193489	0.41362	0.417283	0.660725	0.445863	0.613148	0.540304	0.275025	0.450559	0.452676	MPP_only
Cnot10	0.439316	0.284943	0.465163	0	0.322222	0.367008	0.225686	0.209532	0.399708	0.32594	0	0.271934	0.38257	0.197717	0.180359	0.2347	0.350069	0	0.370706	0.284459	0.314145	0.208315	0.150789	0.289989	0.269884	0.612356	0.275282	0.249782	0.20299	0.185802	0.277981	0.192953	0.288327	0.298978	0.121025	0.19558	0.142736	MPP_only
Cnot2	0.483522	0.482362	0.177517	0.401521	0.396174	0.32201	0.424467	0.428993	0.41888	0.489767	0	0.446458	0.227015	0.388064	0.331782	0.333071	0.417221	0	0.312887	0.255465	0.455042	0.344338	0.781211	0.507205	0.305474	0	0.426273	0.437833	0.408488	0.375685	0.528954	0.386759	0.456844	0.447826	0.259249	0.415762	0.40413	MPP_only
Cnot4	0.338525	0.421777	0	0.687225	0.401169	0.161384	0.406646	0.416604	0.343191	0.423223	0	0.342867	0.227015	0.374811	0.332592	0.233419	0.322373	0	0.236245	0.225022	0.325915	0.266388	0.161014	0.392321	0.277896	0	0.293626	0.272657	0.322386	0.309736	0.371994	0.411149	0.485458	0.350779	0.249819	0.388793	0.377031	MPP_only
Cog4	0.158245	0.205568	0	0.90918	0.181398	0.118329	0.137082	0.147652	0.221592	0.193601	0	0.182037	0.38257	0.157451	0.160977	0.111429	0.146422	0	0.131432	0.118395	0.0876934	0.11646	0	0.201828	0.18141	0	0.18365	0.183007	0.151049	0.14797	0.200766	0.147073	0.200057	0.196523	0.185459	0.160627	0.196987	MPP_only
Coil	0.223077	0.180565	0.177517	0.401521	0.134535	0.0768722	0.151145	0.122406	0	0.168984	0	0.136002	0.394895	0.102233	0.122447	0.091224	0.109097	0	0.102923	0.084761	0.0551469	0.0661164	0.161014	0.144313	0	0.612356	0.106854	0	0.111816	0.0970389	0.164669	0.0969118	0.141187	0.13921	0.115545	0.0898178	0.153222	MPP_only
Commd2	0.406784	0.473175	0.577457	0.687225	0.454975	0.374233	0.443012	0.46006	0.187606	0.469612	0.341502	0.422747	0.61275	0.348294	0.388885	0.289811	0.351809	0	0.303008	0.36281	0.338389	0.266895	0.463976	0.427167	0.413844	0.352336	0.400246	0.702116	0.356461	0.375422	0.380131	0.309312	0.406101	0.350428	0.436425	0.33059	0.301331	MPP_only
Copa	0.187161	0.450246	0.386784	0.401521	0.413997	0.244106	0.448723	0.449996	0.487734	0.439566	0	0.448586	0.895935	0.367956	0.3962	0.416096	0.593829	0	0.503336	0.438857	0.352174	0.386359	0.635488	0.490858	0.305063	0	0.438733	0.457268	0.405423	0.434642	0.525359	0.365552	0.461152	0.479449	0.45515	0.435952	0.415315	MPP_only
Cops7a	0.469135	0.47842	0.177517	0	0.459289	0.367728	0.438852	0.424839	0.302849	0.444964	0	0.495914	0.227015	0.408709	0.436032	0.30592	0.320164	0.32109	0.372853	0.263255	0.148537	0.333598	0.161014	0.397583	0.378919	0	0.490503	0.376629	0.413817	0.349547	0.466319	0.384328	0.466844	0.45598	0.381401	0.358478	0.356687	MPP_only
Coq5	0.357973	0.319935	0.355998	0.401521	0.343341	0.143545	0.272912	0.294796	0.558051	0.259297	0	0.321974	0	0.255943	0.305144	0.208401	0.23359	0	0.263743	0.164614	0.170933	0.24093	0.31397	0.236157	0.23392	0	0.332773	0.308547	0.253235	0.257304	0.242002	0.211792	0.239748	0.278297	0.184342	0.216231	0.278867	MPP_only
Coro1c	0.503425	0.369796	0.178481	0	0.313148	0.457913	0.277484	0.192258	0.312607	0.297474	0	0.280609	0	0.230786	0.168333	0.285529	0.384829	0.32109	0.351297	0.387619	0.198821	0.209108	0.150789	0.271621	0.264472	0.352336	0.288172	0.193489	0.245438	0.171738	0.314521	0.212985	0.324653	0.310108	0.248818	0.243756	0.175437	MPP_only
Coro7	0.346604	0.45	0.668026	0.401521	0.364739	0.337392	0.392287	0.356283	0.313997	0.533601	0.542532	0.418271	0.621911	0.591282	0.404068	0.564582	0.616065	0	0.442971	0.504373	0.634334	0.445003	0.602831	0.568034	0.449266	0.352336	0.434113	0.505508	0.563632	0.504894	0.662216	0.336374	0.507288	0.442935	0.359582	0.542415	0.430146	MPP_only
Cox7a2	1.15124	1.11714	0.703227	1.09071	1.06442	1.43325	0.810848	0.821297	0.932705	1.10929	0	1.11049	1.35896	0.824173	0.799761	0.898514	1.11033	0.563756	1.227	1.19869	0.826123	0.80063	0.781183	1.22069	1.08673	1.13524	1.18357	1.38349	0.855154	0.829938	1.17966	0.945039	1.18274	1.17456	1.34769	0.891775	0.899509	MPP_only
Cox7a2l	1.77622	1.79356	1.59607	1.3774	1.37273	1.56793	1.74295	1.87841	2.13732	1.92834	1.91344	1.64759	1.74107	2.03132	2.0557	1.85493	1.82312	0.922082	1.52232	1.6341	1.79577	1.97442	1.54001	1.92226	1.82122	2.24577	1.63349	1.61996	2.01655	2.03891	1.88644	1.64673	1.72183	1.60956	1.57362	1.94596	1.97963	MPP_only
Cox8a	1.61908	1.74937	1.35906	2.00462	1.89044	1.98365	1.6687	1.69146	2.03418	1.86164	1.28393	2.01479	1.83513	1.80206	1.72694	1.66604	1.79492	1.18533	1.93403	1.90022	1.71757	1.65413	1.50259	1.9294	1.79963	1.99277	2.03081	1.93674	1.72394	1.70624	1.80391	1.67761	1.8407	2.03433	2.0146	1.73536	1.74134	MPP_only
Cpd	0	0.0703547	0	0.401521	0.0938596	0.232808	0.033544	0.0430108	0	0.116173	0	0.104553	0	0.0431894	0.063135	0.0745433	0.117324	0	0.154736	0.0783181	0	0.121325	0	0.0788529	0.036373	0.352336	0.0944422	0.116523	0.0540752	0.0497249	0.127137	0.0590131	0.0727985	0.137453	0.15132	0.0405272	0.0393883	MPP_only
Cpsf6	0.654807	0.698982	0.281556	0.401521	0.623807	0.56029	0.598342	0.558403	0.470328	0.652454	0.720752	0.602258	0	0.639634	0.535291	0.510948	0.587157	0	0.549377	0.40877	0.531004	0.44807	0.407335	0.635078	0.505083	0.612356	0.61573	0.496379	0.61654	0.557424	0.63995	0.457447	0.620237	0.663333	0.440714	0.647401	0.501023	MPP_only
Cpsf7	0.146974	0.225333	0	0.401521	0.211708	0.179286	0.191341	0.185836	0	0.210128	0	0.196321	0.394895	0.185078	0.237123	0.215066	0.283227	0.32109	0.267409	0.200532	0.13522	0.248328	0.150789	0.266185	0.312332	0.612356	0.242801	0.193351	0.196141	0.196212	0.226831	0.224567	0.288339	0.273501	0.13741	0.206785	0.191634	MPP_only
Cpt2	0.142053	0.135899	0.177517	0	0.0781778	0.137043	0.075356	0.0827915	0.0901543	0.204945	0.379251	0.117611	0	0.12878	0.142348	0.0822413	0.151777	0	0.085737	0.0880022	0.0696157	0.0569776	0	0.204039	0	0.352336	0.12898	0	0.141993	0.13515	0.185849	0.0797421	0.115187	0.104804	0.108113	0.119267	0.122748	MPP_only
Cptp	0	0.0818183	0	0	0.086604	0.0697415	0.0512759	0.0475492	0	0.0617896	0	0.09621	0	0.0680682	0.0654874	0.026958	0.0449886	0	0.0653199	0.0511896	0.0277798	0.0357575	0.180734	0.0705518	0.0893703	0	0.0681958	0.289477	0.0691436	0.0466626	0.0709572	0.0308783	0.0386196	0.0731789	0.0629004	0.0515724	0.0605094	MPP_only
Cr1l	0.338333	0.646533	0.467597	0.401521	0.521298	0.506227	0.614965	0.657974	0.845273	0.69345	0.542532	0.531777	0.394895	0.609626	0.665424	0.554509	0.582824	0	0.426668	0.442235	0.509147	0.684472	0.803627	0.682511	0.68849	0.612356	0.50546	0.212511	0.611033	0.616692	0.606668	0.581218	0.561612	0.509513	0.615986	0.530979	0.643836	MPP_only
Cracr2a	0	0.0373901	0	0	0.0438069	0	0.0627421	0.0242414	0	0.00813176	0	0.0432723	0	0.0582347	0.0307305	0.0698876	0.0534318	0	0.0386498	0.0285984	0.0715149	0.0419988	0.133236	0.0418423	0.0675066	0	0.0409779	0.0959884	0.0675706	0.0403761	0.0540025	0.034658	0.0417156	0.0603671	0.0706889	0.0875749	0.0408981	MPP_only
Creb3	0.157347	0.0984124	0.137962	0.687225	0.0723082	0.25271	0.0959179	0.0976622	0.0570411	0.101168	0.379251	0.0877584	0	0.147583	0.102712	0.0728187	0.0883143	0	0.0515208	0.077888	0.127381	0.0419908	0.271308	0.106508	0.0774923	0	0.0841678	0	0.11166	0.103791	0.11343	0.084212	0.0957324	0.101118	0.136172	0.132815	0.071092	MPP_only
Crebzf	0.373955	0.436706	0	0	0.399896	0.187308	0.488676	0.495607	0.360297	0.35919	0.921783	0.350835	0	0.500023	0.418614	0.341928	0.296214	0	0.272297	0.157328	0.48878	0.406943	0.337499	0.387253	0.262674	0.352336	0.367197	0.332554	0.535864	0.446198	0.423999	0.278757	0.305886	0.367582	0.411512	0.432205	0.477853	MPP_only
Crls1	0.168996	0.358788	0.255896	0.687225	0.309387	0.213915	0.27571	0.303556	0.164321	0.217929	0	0.210203	0	0.184909	0.218804	0.148389	0.167049	0	0.20724	0.109829	0.161483	0.180619	0	0.210782	0.117164	0	0.206561	0.249782	0.216201	0.180793	0.22683	0.186057	0.214417	0.220243	0.282416	0.188058	0.131866	MPP_only
Crnkl1	0.149475	0.312529	0.0783793	0.401521	0.248911	0.348316	0.204503	0.237232	0.214064	0.276263	0.592418	0.2865	0.227015	0.20346	0.183125	0.154862	0.256077	0.32109	0.181387	0.161474	0.106949	0.106253	0.31397	0.324122	0.0304697	0	0.242898	0.387767	0.17755	0.18372	0.290584	0.217416	0.304219	0.221194	0.150535	0.187582	0.198027	MPP_only
Cryzl2	0.177119	0.198256	0.178481	0.401521	0.234462	0.188201	0.294444	0.285032	0.469631	0.274727	0.341502	0.296454	0.38257	0.356651	0.413029	0.32786	0.248547	0.32109	0.257872	0.114937	0.315832	0.339811	0.161014	0.284931	0.424053	0	0.276208	0.193489	0.323162	0.375549	0.247357	0.291702	0.213043	0.243241	0.131325	0.32177	0.406333	MPP_only
Csgalnact2	0.033547	0.101791	0.0783793	0.401521	0.117848	0.150467	0.0955833	0.10477	0.0668688	0.128032	0.379251	0.186234	0.227015	0.121863	0.115771	0.158747	0.175096	0	0.215925	0.612809	0.182295	0.102361	0	0.152544	0.182054	0.612356	0.171177	0.42507	0.132305	0.163614	0.168357	0.122968	0.154902	0.174837	0.577353	0.147742	0.117358	MPP_only
Csnk1d	0.602661	0.392984	0.209267	0	0.362757	0.339196	0.346356	0.402237	0.500155	0.343337	0.341502	0.348864	0.394895	0.333997	0.377089	0.437285	0.43815	0	0.372114	0.428271	0.374683	0.412829	0.133236	0.321728	0.296417	0	0.361407	0.358634	0.354516	0.392534	0.369849	0.421569	0.386928	0.397171	0.263287	0.390448	0.415976	MPP_only
Cspp1	0.23193	0.443655	0.0783793	0.401521	0.395985	0.310347	0.324923	0.305738	0.306699	0.515035	0	0.37092	0.394895	0.344237	0.253247	0.24169	0.367096	0.32109	0.307027	0.324081	0.216569	0.214647	0	0.486493	0.207318	0.352336	0.364204	0.212511	0.336186	0.248373	0.467391	0.249613	0.439695	0.358448	0.238803	0.34478	0.277773	MPP_only
Ctdp1	0.167129	0.13933	0	0	0.131789	0.332633	0.125553	0.0868056	0.147195	0.088994	0	0.0841204	0	0.0811509	0.0560506	0.0841253	0.0981285	0	0.146192	0.0949037	0.0211925	0.0579696	0	0.0830493	0.0396713	0	0.116269	0.272518	0.0580096	0.0524761	0.0920772	0.0672812	0.112855	0.111521	0.107468	0.0606745	0.0650888	MPP_only
Ctr9	0.227619	0.53329	0.0783793	0.90918	0.481129	0.522732	0.432797	0.323491	0.401919	0.473943	0	0.448102	0	0.396006	0.263418	0.244807	0.298036	0	0.32696	0.22999	0.178671	0.224901	0.294251	0.495337	0.369346	1.13524	0.441816	0.435493	0.348	0.258997	0.564276	0.283844	0.411481	0.486079	0.21325	0.393048	0.250453	MPP_only
Ctsg	0	0.107045	0	0	0.167414	1.17143	0.0253336	0.000934262	0	0.0717605	0	0.167918	0.394895	0.0399929	0	0.0486759	0.118546	0	0.227434	2.14272	0.105593	0	0	0.123181	0	0	0.208824	2.88389	0.0309269	0	0.110069	0.0645913	0.126052	0.227216	3.08555	0.0880611	0.0129858	MPP_only
Cxcr4	0	0.400095	0	0.687225	0.306151	0.244417	0.167303	0.119884	0	0.266042	0	0.259588	0.394895	0.158025	0.121577	0.154953	0.339096	0	0.276381	0.612646	0.335149	0.102441	0	0.357899	0.0436273	0.352336	0.291786	0.633381	0.135497	0.0943726	0.348845	0.060411	0.189233	0.284149	0.481674	0.137096	0.078935	MPP_only
Cyth2	0.397357	0.298222	0.0783793	0	0.214723	0.207401	0.208535	0.200051	0.528061	0.395039	0	0.249164	0.394895	0.254557	0.250498	0.185875	0.260299	0	0.229251	0.240874	0.180932	0.171675	0	0.361967	0.276505	0	0.255081	0.183007	0.248245	0.274304	0.306948	0.213088	0.299415	0.224559	0.218325	0.228222	0.211669	MPP_only
Cyth4	0.32317	0.295937	0.321561	0	0.283579	0.58645	0.403606	0.301146	0.189169	0.330224	0.341502	0.26611	0.777465	0.437423	0.332627	0.356096	0.301025	0	0.255035	0.255287	0.489015	0.54808	0.382281	0.304589	0.432611	0.352336	0.276202	0.515815	0.483289	0.335936	0.303642	0.169448	0.180695	0.290139	0.582935	0.459491	0.323859	MPP_only
D16Ertd472e	0.39056	0.467344	0.603117	0.90918	0.411747	0.223416	0.447112	0.331674	0.303587	0.534202	0	0.398332	0	0.480233	0.34902	0.36445	0.393368	0	0.358194	0.385028	0.322052	0.325824	0.161014	0.550331	0.392684	0.352336	0.455694	0.0768278	0.435534	0.381402	0.60594	0.506436	0.617889	0.478152	0.423921	0.519015	0.340929	MPP_only
D17Wsu92e	0.255792	0.263174	0.178481	0	0.247246	0.339321	0.253794	0.215801	0.0974522	0.214467	0.341502	0.184863	0.227015	0.184989	0.174982	0.240819	0.235528	0	0.239966	0.228922	0.276828	0.276046	0.350571	0.185649	0.284823	0	0.200985	0.135512	0.191733	0.175016	0.253389	0.358377	0.350143	0.222008	0.285284	0.210435	0.282852	MPP_only
D5Ertd605e	0.202543	0.152302	0	0	0.140449	0	0.105903	0.0489257	0	0.22296	0	0.170437	0.227015	0.198664	0.0764589	0.204393	0.279339	0	0.196423	0.124601	0.163675	0.106752	0	0.213306	0.036373	0.352336	0.205747	0.242004	0.209713	0.0953052	0.19271	0.0590671	0.0744748	0.195717	0.04608	0.171898	0.0726651	MPP_only
Dcaf7	0.0810236	0.350972	0.316443	0.401521	0.296054	0.263568	0.234093	0.159748	0.57501	0.275757	0	0.225294	0	0.19598	0.213197	0.280264	0.40809	0	0.333002	0.300711	0.367558	0.156298	0	0.321483	0.207352	0.352336	0.272665	0.329082	0.247174	0.183261	0.365118	0.225332	0.329104	0.283077	0.205685	0.240992	0.199112	MPP_only
Dcun1d1	0.694606	0.700645	0	0.401521	0.644855	0.347606	0.637568	0.600549	0.650663	0.792338	0.341502	0.738682	0.227015	0.851915	0.890727	0.668069	0.652169	0	0.664957	0.352248	0.466227	0.662576	1.40546	0.802009	0.885182	0	0.750691	0.40952	0.890289	0.822325	0.87817	0.692124	0.690647	0.724711	0.309393	0.847763	0.887459	MPP_only
Dda1	0.207148	0.409009	0	1.24429	0.416495	0.444949	0.359626	0.342138	0.310088	0.38673	0.379251	0.356893	0.227015	0.314535	0.25394	0.327391	0.472345	0	0.432304	0.510161	0.367952	0.374833	0.299086	0.338538	0.34133	0.818528	0.390832	0.445473	0.333986	0.318415	0.415694	0.367643	0.427634	0.406111	0.325798	0.270633	0.290264	MPP_only
Ddah2	0.230813	0.448492	0.178481	0.687225	0.240919	0.140815	0.294506	0.33427	0.401097	0.541327	0	0.321383	0	0.340601	0.388225	0.28232	0.479686	0	0.263666	0.107899	0.297727	0.242545	0.393233	0.485532	0.208339	0.612356	0.323673	0.0768278	0.351387	0.425513	0.435931	0.281255	0.413801	0.299097	0.0858807	0.335695	0.384061	MPP_only
Ddb1	0.529205	0.682599	0.355998	1.09071	0.661123	0.907504	0.558737	0.548855	0.322834	0.691964	0	0.624129	0.621911	0.452509	0.448385	0.564376	0.756061	0	0.727476	0.623505	0.687446	0.560418	0.469594	0.706775	0.481521	0.612356	0.650955	0.646196	0.516948	0.452378	0.795918	0.559656	0.727328	0.76461	0.562074	0.56719	0.575255	MPP_only
Ddt	0.409607	0.406915	0.7711	0.401521	0.393375	0.572711	0.399554	0.363157	0.364792	0.486174	0.542532	0.460967	0.50104	0.384341	0.449139	0.304372	0.399536	0	0.32348	0.343361	0.370973	0.276591	0.431478	0.485185	0.497276	0.612356	0.432281	0.431866	0.419648	0.426761	0.448966	0.35495	0.39305	0.396911	0.344188	0.351716	0.349074	MPP_only
Ddx17	0.581612	0.678415	0.640212	0.90918	0.547411	0.482767	0.659727	0.656445	0.221362	0.583205	0.379251	0.499726	0.38257	0.587328	0.555143	0.458901	0.448463	0	0.408526	0.310044	0.524536	0.624403	0.379993	0.535735	0.363533	0.989372	0.47024	0.541805	0.556262	0.54752	0.614016	0.526076	0.503208	0.508123	0.463466	0.567994	0.655451	MPP_only
Ddx19b	0.0675525	0.0569384	0	0	0.0502305	0	0.0534517	0.0381444	0	0.0592791	0	0.0245522	0	0.036444	0.0385795	0.0657169	0.0598301	0	0.0614923	0.0882137	0.104161	0.0439062	0	0.051469	0.036373	0	0.0398994	0	0.0497714	0.0398725	0.0825703	0.042377	0.0614697	0.0327813	0.0435752	0.0552564	0.0278811	MPP_only
Ddx20	0.033547	0.19153	0.209267	0.687225	0.22019	0.256339	0.158939	0.112539	0	0.167876	0.341502	0.142191	0	0.102059	0.0691057	0.0628392	0.0945744	0	0.109357	0.0849893	0.0808801	0.0543402	0.180734	0.183516	0.0470226	0	0.172691	0	0.093932	0.0742455	0.165689	0.1246	0.192698	0.195066	0.0857773	0.119888	0.0802438	MPP_only
Ddx21	0.741132	0.730455	0.852934	0	0.888077	0.341051	0.864308	0.742164	0.381323	0.367893	0	0.514	0.777465	0.429255	0.323405	0.445138	0.417031	0.32109	0.653156	0.435369	0.455068	0.527997	0.531305	0.342861	0.574788	0.612356	0.582966	0.408169	0.38659	0.346231	0.426543	0.728977	0.664618	0.645041	0.593237	0.443651	0.450938	MPP_only
Ddx24	0.603379	0.890209	0.916485	1.09071	0.898714	0.594819	0.848454	0.869961	0.895848	0.746921	0.856024	0.691037	0.596747	0.627146	0.690262	0.763585	0.842239	0.563756	0.727044	0.744883	0.637343	0.80849	0.767081	0.747066	0.682207	1.13524	0.69733	0.776408	0.719723	0.690807	0.842189	1.00698	1.06625	0.8518	0.839178	0.794028	0.844428	MPP_only
Ddx55	0.0586226	0.276224	0.386784	0	0.315452	0.197228	0.280043	0.256714	0.214064	0.226887	0.341502	0.277076	0	0.222577	0.224578	0.202514	0.189147	0.32109	0.219515	0.112363	0.227935	0.14863	0.138072	0.260253	0.0934443	0.612356	0.241978	0.212559	0.235835	0.258673	0.237037	0.143211	0.153159	0.261423	0.124383	0.219513	0.15195	MPP_only
Ddx58	0.346268	0.265956	0.610222	0	0.164227	0.0697415	0.257331	0.311219	0.0999129	0.321838	1.389	0.201702	0	0.348255	0.313202	0.25642	0.218427	0	0.160897	0.0659886	0.437167	0.258107	0.373848	0.2886	0.891997	0.989372	0.175746	0	0.311338	0.277123	0.667397	1.37124	1.3406	0.431238	0.27358	0.6983	0.786057	MPP_only
Derl1	0.542451	0.377611	0.969078	0.401521	0.428619	0.489929	0.440451	0.487594	0.173614	0.395476	0.379251	0.380867	0.38257	0.421311	0.450499	0.322396	0.326308	0.563756	0.370672	0.741923	0.211334	0.424736	0.432323	0.360484	0.36666	0.352336	0.400161	0.348454	0.417692	0.413881	0.348947	0.358527	0.316298	0.388127	0.605324	0.375327	0.359612	MPP_only
Derl2	0.167129	0.309439	0.703227	0.687225	0.318	0.30286	0.276107	0.274534	0.328726	0.308824	0.921783	0.301861	0.227015	0.24899	0.168019	0.138659	0.277006	0.32109	0.213963	0.234107	0.101644	0.156526	0.133236	0.290069	0.166926	0	0.298313	0.504602	0.203599	0.197879	0.266683	0.184132	0.293927	0.282039	0.337534	0.215822	0.204295	MPP_only
Desi1	0.0788348	0.257739	0.49396	0	0.331997	0.232233	0.265554	0.176792	0.110198	0.215507	0	0.270319	0	0.203523	0.168937	0.203908	0.328603	0	0.271859	0.172146	0.273426	0.117796	0	0.226087	0.119671	0.818528	0.252476	0.0768278	0.196318	0.131017	0.20013	0.204651	0.223615	0.255118	0.303012	0.211893	0.142906	MPP_only
Dexi	0.225494	0.198464	0.355998	0	0.15477	0.0697415	0.180023	0.155746	0.116573	0.181862	0.592418	0.181271	0	0.199438	0.17122	0.237917	0.24703	0	0.178031	0.119118	0.374318	0.202748	0.150789	0.231286	0.218212	0.352336	0.199417	0.0769661	0.203812	0.21334	0.188319	0.182683	0.239248	0.171228	0.138608	0.220254	0.21827	MPP_only
Dgke	0.033547	0.065264	0	0	0.0487202	0	0.0636548	0.0550199	0	0.0602681	0	0.0235087	0.227015	0.0352467	0.0571745	0.0759834	0.126505	0	0.0899284	0.0649735	0.136507	0.0429924	0.180734	0.0399557	0.0675066	0	0.0534878	0	0.0553258	0.0339906	0.042276	0.0223887	0.0280938	0.0723857	0.0221833	0.04428	0.0428136	MPP_only
Dgkg	0.068451	0.0647423	0.177517	0	0.0517399	0	0.079167	0.11059	0.154493	0.0821132	0.379251	0.156645	0.227015	0.176864	0.177526	0.12111	0.0713462	0	0.100278	0.11136	0.116481	0.112727	0.161014	0.10905	0.105875	0	0.102832	0.193489	0.168946	0.181678	0.0995526	0.108684	0.0730686	0.116265	0.230938	0.14844	0.164897	MPP_only
Dhx38	0.068451	0.192209	0	0	0.130082	0.240922	0.1158	0.12208	0.156954	0.170716	0	0.141248	0.621911	0.0969201	0.0876359	0.144603	0.192288	0	0.166701	0.156424	0.179977	0.146486	0	0.17545	0.10388	0	0.141654	0.289339	0.0915431	0.124518	0.201623	0.125369	0.180103	0.152672	0.117167	0.1311	0.141567	MPP_only
Dhx9	0.928291	0.715711	0.466128	0.687225	0.834112	0.334616	0.738242	0.634225	0.477451	0.507642	0.720752	0.687771	0.99532	0.556392	0.439839	0.645223	0.588863	0.32109	0.721373	0.467176	0.519671	0.518071	0	0.50228	0.490863	0.818528	0.630178	0.331203	0.486448	0.488239	0.583493	0.569552	0.646127	0.710068	0.448004	0.512013	0.554985	MPP_only
Dip2b	0.245964	0.168761	0	0	0.142354	0.0326727	0.15081	0.127395	0.116632	0.143038	0	0.11627	0	0.162717	0.12133	0.213119	0.263171	0	0.179526	0.194394	0.311287	0.132212	0.133236	0.137823	0	0	0.136859	0.242004	0.148122	0.120153	0.210662	0.134958	0.155656	0.160203	0.105308	0.181271	0.156201	MPP_only
Dis3l2	0.0675525	0.14521	0	0.401521	0.104209	0.124057	0.114621	0.146556	0.0668688	0.177054	0	0.0986203	0	0.132683	0.117288	0.1528	0.180322	0	0.180184	0.0768456	0.0828448	0.138603	0	0.173925	0.241893	0	0.137819	0	0.149198	0.11818	0.176752	0.132035	0.185142	0.142787	0.0147965	0.14168	0.121961	MPP_only
Dleu7	0	0.0384681	0	0.401521	0.0652826	0	0.0539769	0.0217946	0.0570411	0.0288128	0	0.0637319	0	0.0255775	0.0164426	0.0129654	0.00944968	0	0.0229793	0.0168656	0	0.00658484	0.138072	0.0164671	0.0396713	0	0.067208	0	0.0453088	0.022063	0.0156274	0.0177572	0.0162311	0.0443647	0	0.0247611	0.0140008	MPP_only
Dlg4	0.0810236	0.190968	0.321561	0	0.162382	0.0668846	0.164679	0.18815	0.096063	0.199452	0	0.189224	0	0.189094	0.155869	0.135368	0.162977	0	0.116551	0.133026	0.0761517	0.196813	0	0.206564	0.219706	0	0.199308	0.172954	0.2451	0.18205	0.225095	0.103044	0.139759	0.173833	0.0756618	0.241637	0.227368	MPP_only
Dlgap5	0	0.419059	0.178481	0	0.120143	0.338425	0.0183974	0.0140171	0	0.641989	0	0.180916	0	0.027998	0.0213408	0.0149438	0.393077	0	0.0988757	0.0872661	0.0410799	0.00669893	0.133236	0.636642	0.0914384	0	0.171531	0.368645	0.0262104	0.0227386	0.604531	0.0458126	0.412157	0.148113	0.10195	0.0150996	0.0162569	MPP_only
Dlst	0.415642	0.427265	0.387749	0.401521	0.480356	0.451656	0.447018	0.371421	0.214084	0.350152	0	0.414537	0.895935	0.366297	0.345765	0.39233	0.438902	0	0.460951	0.603286	0.455462	0.399982	0.311803	0.385728	0.412825	0.352336	0.461181	0.622958	0.343082	0.354048	0.387858	0.382526	0.536442	0.446203	0.643975	0.373194	0.303977	MPP_only
Dnaja1	1.8783	2.05663	1.72189	2.34063	2.04319	1.59049	1.85706	1.77438	1.41373	1.50425	1.53797	1.67091	1.46318	1.38906	1.25425	1.2724	1.33765	0.758884	1.56314	1.39241	1.38017	1.23871	1.21976	1.53503	1.44146	1.47684	1.6518	1.45653	1.4224	1.36759	1.48295	1.8587	1.82824	1.53038	1.34945	1.4364	1.38076	MPP_only
Dnajc6	0.0897942	0.0664841	0	0	0.0538472	0	0.0284329	0.0189779	0	0.101357	0	0.0656197	0	0.0605754	0.0524592	0.113257	0.161963	0	0.131471	0.0928127	0.140993	0.0382666	0	0.134223	0.114742	0	0.0742406	0.0769661	0.065315	0.037326	0.131141	0.0733764	0.103653	0.0892565	0.0157091	0.0864126	0.0496162	MPP_only
Dnase2a	0.101998	0.328089	0	0	0.379359	0.268226	0.384532	0.298048	0.522713	0.379153	0	0.370743	0.227015	0.403461	0.343775	0.28487	0.289598	0.32109	0.368754	0.349177	0.186871	0.170279	0.662374	0.305162	0.300696	0	0.389636	0.550511	0.378419	0.297576	0.310628	0.216198	0.248584	0.366049	0.165196	0.33962	0.261996	MPP_only
Dnmt3a	0.137457	0.325049	0.178481	0	0.360488	0.21827	0.412346	0.369525	0.316926	0.272616	0.379251	0.322262	0.394895	0.36659	0.353368	0.268543	0.262764	0	0.240639	0.194359	0.212512	0.303357	0.429779	0.245831	0.356658	0.352336	0.296237	0.252254	0.327363	0.343674	0.310465	0.281003	0.250934	0.331759	0.153554	0.387717	0.39109	MPP_only
Dohh	0.410518	0.38772	0.178481	0.401521	0.442221	0.471322	0.336037	0.313802	0.254406	0.404162	0.341502	0.414342	0	0.292633	0.366647	0.231705	0.299793	0.32109	0.292324	0.391483	0.189374	0.174755	0	0.381651	0.240522	0.612356	0.348814	0.436419	0.277266	0.331692	0.328485	0.270404	0.350761	0.333538	0.415378	0.277654	0.216681	MPP_only
Dtnb	0.12152	0.140596	0	0	0.122472	0.131898	0.095868	0.103585	0.242331	0.135886	0.341502	0.137308	0	0.123488	0.0971235	0.15896	0.165884	0	0.189105	0.166772	0.176988	0.0997038	0	0.131677	0	0	0.160592	0.116523	0.123491	0.114992	0.124807	0.107448	0.168238	0.169047	0.144966	0.118286	0.144169	MPP_only
Dusp1	0.777695	0.252094	0.178481	0	0.252863	0.316736	0.229485	1.00685	0.870496	0.544062	0.921783	0.413044	0	0.383736	1.26726	1.03425	0.871163	1.48335	0.784077	1.1219	0.91749	1.44825	1.04502	0.408986	0.795515	0.352336	0.327202	0.5152	0.330269	1.45197	0.458417	0.834457	0.505802	0.414678	0.419533	0.505578	1.31264	MPP_only
Dusp12	0.189971	0.295306	0.178481	0.401521	0.253784	0.0856558	0.258513	0.218755	0.422939	0.163921	0.341502	0.227402	0	0.206183	0.138936	0.14466	0.155707	0	0.143838	0.11742	0.183275	0.141468	0	0.203197	0.173228	0	0.195061	0.172816	0.165267	0.147818	0.124349	0.172059	0.161505	0.172658	0.141497	0.162006	0.199867	MPP_only
Dusp7	0.246837	0.134071	0	0	0.132761	0.0454007	0.106261	0.0786375	0	0.0553773	0	0.101111	0	0.084214	0.0554788	0.0353504	0.0420393	0	0.0470168	0.0236283	0.029114	0.0238999	0	0.0638268	0.100642	0	0.0935316	0.153794	0.0891181	0.0596588	0.105145	0.0483646	0.0280501	0.120529	0.0368023	0.105058	0.0562954	MPP_only
Dym	0.206928	0.173032	0	0	0.179579	0.0326727	0.130237	0.154164	0.1835	0.208273	0.341502	0.207131	0.621911	0.154973	0.174382	0.216828	0.289625	0	0.271057	0.22859	0.238456	0.190065	0	0.203914	0.177758	0	0.193106	0.172816	0.157898	0.162045	0.230883	0.194276	0.233857	0.219775	0.189056	0.186677	0.192772	MPP_only
Dync2h1	0.104501	0.0781421	0	0	0.0898421	0.0454007	0.0618757	0.0595745	0	0.0740431	0	0.0587596	0.227015	0.0813441	0.0398921	0.0833976	0.116479	0.32109	0.115597	0.0511739	0.0760039	0.0853571	0.133236	0.0629603	0	0	0.105361	0.116523	0.0708557	0.0699783	0.116111	0.0856339	0.0923106	0.118116	0.0790503	0.0630018	0.0825785	MPP_only
Dynll2	0.91504	0.532601	0	0.401521	0.719012	0.418446	0.503624	0.579137	0.186217	0.446707	0.341502	0.500718	0.621911	0.332016	0.380417	0.427111	0.45759	1.29484	0.579301	0.425532	0.532623	0.492714	0.133236	0.398822	0.535002	0.818528	0.53772	0.393031	0.348185	0.420325	0.375348	0.457981	0.421319	0.571919	0.332681	0.394408	0.458497	MPP_only
Dynlt1a	0.033547	0.0700229	0	0	0.0479867	0.237618	0.0324977	0.0128149	0	0.0959435	0	0.0578713	0	0.0300565	0.0308502	0.0432756	0.141661	0	0.084647	0.135383	0.0531371	0.0232165	0	0.0800309	0	0	0.0728611	0	0.0453753	0.0397959	0.137578	0.0216538	0.0751187	0.0666605	0.136896	0.0676381	0.0410983	MPP_only
Dynlt1f	0.368429	0.29367	0	0.687225	0.292164	0.47535	0.185819	0.171239	0.166782	0.360751	0.341502	0.341413	0	0.227818	0.247666	0.307503	0.553175	0	0.469465	0.500911	0.416703	0.253074	0.138072	0.406763	0.243353	0.352336	0.371695	0.474957	0.259187	0.169523	0.460369	0.233061	0.418035	0.367932	0.390257	0.280844	0.19711	MPP_only
E030030I06Rik	0	0.0366777	0.0783793	0	0.0540566	0.0611382	0.0546789	0.0396957	0.0974522	0.0590527	0	0.0587591	0	0.0643498	0.0477716	0.0296708	0.0331724	0.32109	0.0314153	0	0.0747693	0.0149149	0	0.0410036	0.053773	0	0.0552158	0.0959884	0.0652639	0.0438199	0.0275574	0.0470341	0.0348837	0.0626114	0	0.0606211	0.0575142	MPP_only
E130308A19Rik	0.0675525	0.131339	0	0	0.116256	0	0.12183	0.144667	0.220058	0.0992154	0	0.103221	0	0.086103	0.0858674	0.123984	0.143754	0	0.11782	0.066199	0.178387	0.155229	0.180734	0.126077	0.0588521	0.352336	0.101373	0	0.0724686	0.087947	0.123719	0.101979	0.0748851	0.137412	0.0223659	0.09069	0.115408	MPP_only
E230032D23Rik	0.033547	0.104015	0.209267	0	0.0448414	0	0.0484438	0.0645076	0.0999129	0.172273	0.741395	0.111702	0	0.16969	0.101996	0.0925602	0.0970635	0	0.0468729	0.137835	0.0300864	0.0690909	0	0.246972	0.234062	0	0.104158	0.0769661	0.149374	0.120312	0.231933	0.056564	0.0595393	0.0946129	0.0542913	0.141517	0.109725	MPP_only
E2f5	0.0879726	0.0743998	0	0	0.0432946	0.0611382	0.0754957	0.111367	0	0.0659076	0	0.0327496	0	0.0605128	0.0599273	0.0463831	0.0184326	0.32109	0.0149161	0.0435675	0.0673681	0.0678321	0	0.0312728	0.0927657	0	0.0428418	0.0768278	0.0520297	0.0614737	0.0336955	0.0697533	0.0667437	0.0284464	0.0569315	0.0817011	0.107155	MPP_only
E2f8	0	0.196769	0	0	0.24124	0.410668	0.0162406	0.00844146	0.116632	0.252288	0	0.309045	0	0.0242063	0.0167048	0.022804	0.17892	0	0.248693	0.195287	0	0	0	0.249394	0.0712945	0.612356	0.265186	0.348242	0.0121747	0.0112662	0.278652	0.0584237	0.206318	0.260913	0.301928	0.0223573	0.0155224	MPP_only
Ecscr	0	0.0362849	0	0	0.0684597	0.0402551	0.0283972	0.0699341	0	0.0552031	0	0.0728876	0	0.0550397	0.141028	0.0490733	0.0256782	0	0.0558595	0.00944432	0.0300864	0.14137	0.150789	0.0525354	0	0	0.06493	0	0.0445254	0.110433	0.0385789	0.0612735	0.0504953	0.0629459	0.0191026	0.03917	0.140526	MPP_only
Ect2	0	0.46632	0	0	0.103875	0.206213	0.0161703	0.023114	0	0.548434	0.379251	0.144735	0.394895	0.0319688	0.0173419	0.0275744	0.385953	0	0.159696	0.0882487	0.0193091	0.00429041	0	0.595219	0	0.612356	0.146999	0.195691	0.0319841	0.0340233	0.605335	0.0475156	0.548618	0.173978	0.166001	0.0334606	0.0336857	MPP_only
Edc4	0.104501	0.165847	0.177517	0.401521	0.0942947	0.269691	0.104007	0.100382	0	0.156857	0	0.113837	0	0.145993	0.113671	0.0857686	0.117884	0	0.0990046	0.0359443	0.0722478	0.0753292	0	0.121688	0.113673	0.612356	0.0869059	0.212511	0.0835319	0.0806701	0.176631	0.0956614	0.169459	0.130279	0.0685588	0.140344	0.0773034	MPP_only
Eftud2	0.421385	0.539165	0.281556	0.401521	0.527396	0.239812	0.383316	0.382684	0.518542	0.439848	0.542532	0.470237	1.28979	0.263627	0.2622	0.362658	0.498266	0	0.573785	0.320101	0.365734	0.267507	0	0.435054	0.2671	0.612356	0.512452	0.655018	0.347996	0.279009	0.526421	0.36146	0.499816	0.5327	0.352542	0.33116	0.289093	MPP_only
Egln1	0.354926	0.215671	0	0.687225	0.405981	0.261839	0.342123	0.253648	0.264234	0.187498	0	0.347509	0	0.296181	0.184353	0.347918	0.283328	0	0.38652	0.400476	0.306653	0.237409	0.138072	0.195326	0.198266	0.818528	0.345509	0.259973	0.287261	0.214182	0.224283	0.191639	0.21398	0.363005	0.298506	0.288136	0.192785	MPP_only
Eif2ak2	0.29607	0.511233	0.736483	1.3774	0.411436	0.553267	0.417063	0.365096	0.263768	0.362179	1.41006	0.36807	0.38257	0.42361	0.388769	0.27602	0.388153	0	0.295246	0.18539	0.338123	0.310995	0.452042	0.448858	1.27996	1.26252	0.385808	0.193489	0.38384	0.286456	0.796569	1.51828	1.54883	0.664286	0.469263	0.744119	0.774538	MPP_only
Eif3c	1.16131	1.29203	0.841891	1.09071	1.21398	1.12267	1.10757	1.0735	0.806197	1.10953	0.341502	1.05065	1.28979	0.912497	0.887653	0.998128	1.14572	0	1.19596	0.989364	0.920117	0.892209	0.973742	1.07845	1.12718	1.13524	1.09534	1.13816	0.92337	0.90221	1.17239	1.04668	1.17054	1.11283	1.07475	1.00934	0.859046	MPP_only
Eif3f	2.28408	2.04475	2.01813	1.78187	1.91387	1.94959	2.11318	2.12024	2.29118	2.09681	2.53114	1.98933	2.28236	2.25909	2.2141	2.17014	2.06424	1.56576	1.94332	2.15884	2.188	2.12968	2.14605	2.09605	2.22554	1.65324	2.00281	1.94396	2.24793	2.24292	2.00985	1.98126	1.92964	1.95712	2.13159	2.17467	2.11229	MPP_only
Eif3h	1.84056	1.81599	1.74635	2.12959	1.77593	1.79266	1.76316	1.723	1.92996	1.89049	1.82431	1.82478	1.83513	1.8784	1.87108	1.78716	1.83015	1.06235	1.75361	1.78632	1.80249	1.74511	1.51442	1.90447	1.80735	1.56892	1.79421	1.9448	1.85275	1.84286	1.79476	1.67248	1.74569	1.74665	1.85288	1.82197	1.77505	MPP_only
Eif3k	1.66449	1.71792	1.58388	1.93574	1.70356	1.73586	1.67299	1.63325	1.74051	1.74175	1.82025	1.69792	1.79715	1.76286	1.70595	1.65234	1.67699	1.06235	1.63029	1.71522	1.66408	1.51254	1.81135	1.66134	1.71588	1.65324	1.71039	1.92618	1.72443	1.64406	1.63459	1.55767	1.56815	1.62707	1.64203	1.65608	1.51067	MPP_only
Eif4a2	1.18976	0.834749	0.640538	0.401521	0.787209	0.808367	0.895419	1.14551	1.15981	0.964989	0.933919	0.958933	0.895935	1.14022	1.37172	1.00068	0.920081	0.758884	0.962119	0.752706	1.0561	1.34624	0.626314	0.987713	1.20714	0.612356	1.02994	0.497868	1.11041	1.41449	0.954359	0.958346	0.854304	0.995832	0.879142	1.08223	1.3636	MPP_only
Eloa	0.230228	0.232746	0.209267	0	0.238503	0.233805	0.23331	0.172509	0.223823	0.23091	0	0.23064	0	0.264127	0.205341	0.161019	0.161322	0	0.170326	0.228986	0.222468	0.165487	0.271308	0.197247	0.331312	0	0.224772	0.212479	0.205458	0.191045	0.192964	0.216645	0.248335	0.229634	0.416142	0.227878	0.22436	MPP_only
Emc7	0.629129	0.59374	0.805987	0.90918	0.616494	0.68497	0.489643	0.503658	0.520131	0.53593	0	0.548736	0.99532	0.385995	0.474341	0.543425	0.67582	0	0.601594	0.593719	0.556748	0.601316	0	0.518279	0.339667	0.818528	0.552377	0.620972	0.467777	0.437826	0.498684	0.479456	0.600935	0.510429	0.553274	0.461339	0.412895	MPP_only
Emilin2	0.187543	0.0720229	0	0	0.0796405	0.253169	0.0829661	0.0540822	0	0.0150924	0.379251	0.0535081	0.746214	0.0146994	0.0289322	0.0382864	0.0286966	0	0.070818	0.665652	0.0366347	0.0193126	0	0.00748737	0	0	0.0346341	0.193351	0.0257392	0.0116651	0.0146439	0.0535004	0.0246768	0.0520243	0.409557	0.0280157	0.0155153	MPP_only
Eno1	0.42224	0.61511	0.178481	0.90918	0.723013	0.714833	0.613418	0.567604	0.896585	0.519874	0	0.739817	0.839766	0.547932	0.544638	0.723391	0.727979	0	0.906456	0.924248	0.651826	0.638502	0.582266	0.603789	0.522524	0.989372	0.759269	0.816369	0.619025	0.55495	0.591596	0.567585	0.625594	0.760732	0.74755	0.605285	0.551315	MPP_only
Ep400	0.469438	0.644207	0	0.687225	0.53745	0.618792	0.511778	0.500337	0.591414	0.525357	0.542532	0.482736	0.227015	0.401739	0.430553	0.458659	0.605157	0.32109	0.540898	0.383068	0.497354	0.422829	0.492537	0.562237	0.365804	0.612356	0.495096	0.573345	0.451214	0.417297	0.633354	0.535679	0.639306	0.631724	0.247421	0.494865	0.449375	MPP_only
Epb41l3	0.263096	0.106764	0.177517	0	0.182246	0.118428	0.140715	0.101689	0	0.0741405	0	0.157172	0	0.126013	0.0518116	0.14945	0.0915198	0	0.219462	0.0320893	0.130536	0.0806334	0	0.103207	0.279752	0	0.166991	0	0.139854	0.0597717	0.106376	0.119971	0.0989124	0.128727	0.0152344	0.113667	0.0950823	MPP_only
Eps15l1	0.476564	0.270089	0.177517	0.401521	0.272253	0.190458	0.256903	0.239265	0.337935	0.229429	0.341502	0.222164	0	0.175698	0.206966	0.216795	0.29471	0	0.294851	0.203882	0.313697	0.228925	0.150789	0.274284	0.160287	0	0.25546	0.0768278	0.187482	0.187317	0.257888	0.237966	0.268288	0.248233	0.160638	0.230206	0.175083	MPP_only
Eral1	0.290858	0.111189	0	0.401521	0.0874044	0	0.064952	0.0805343	0	0.134231	0	0.125774	0.621911	0.0947672	0.0568964	0.0578358	0.12358	0	0.0866692	0.0988074	0.138804	0.0755032	0.150789	0.120155	0.12085	0	0.103492	0.289339	0.0686879	0.0973551	0.134109	0.0860006	0.106668	0.0732628	0.0147837	0.0712335	0.0973297	MPP_only
Ercc8	0.12152	0.15528	0.352892	0	0.157135	0.11594	0.162356	0.102199	0.0570411	0.0763584	0	0.152817	0	0.084001	0.076212	0.0669574	0.0666337	0	0.101514	0.0537212	0.154716	0.0565972	0.161014	0.0762169	0	0.612356	0.134508	0.116523	0.0981456	0.0831903	0.112791	0.130129	0.122948	0.126818	0.117194	0.104025	0.0695271	MPP_only
Ergic1	0.104501	0.237254	0.395309	0	0.300632	0.0995573	0.23607	0.225054	0	0.180664	0.341502	0.304417	0	0.158734	0.151025	0.22378	0.237394	0.32109	0.324697	0.193925	0.195755	0.176772	0.369012	0.196625	0.140824	0.352336	0.254226	0.212511	0.15441	0.150956	0.18232	0.225445	0.195792	0.280008	0.201145	0.220171	0.176672	MPP_only
Erh	0.80289	0.784077	0.458759	1.24429	0.960725	0.666577	0.696729	0.583047	0.473503	0.551417	0.933919	0.737997	0.991642	0.480526	0.424869	0.844701	0.970643	0	1.26799	0.916448	0.83875	0.567496	0.486597	0.665821	0.731805	0.612356	0.919848	0.908002	0.538759	0.439947	0.630739	0.638335	0.742951	0.934897	0.678702	0.520193	0.401441	MPP_only
Eri2	0.068451	0.125753	0	0	0.0465953	0.0611382	0.0311973	0.0229843	0	0.173681	0	0.0566079	0	0.0505885	0.0264057	0.0252091	0.0655792	0	0.0377792	0.0674336	0.0277798	0.0292452	0	0.114265	0	0	0.0581575	0.116523	0.0491418	0.0426354	0.190983	0.0194167	0.0610196	0.0667172	0.0509108	0.0335404	0.0447867	MPP_only
Erlec1	0.303397	0.316494	0.343165	0.401521	0.217034	0.0856558	0.261373	0.281821	0.154724	0.396696	0	0.298151	0	0.265479	0.321062	0.283179	0.302902	0.563756	0.247738	0.33355	0.259865	0.254888	0.288861	0.311678	0.372115	0.612356	0.236656	0.505508	0.295296	0.322888	0.378893	0.206731	0.280911	0.242297	0.16076	0.265886	0.288853	MPP_only
Ero1l	0.134642	0.121353	0.281556	0	0.174248	0.338007	0.147853	0.15169	0.340454	0.106372	0	0.141749	0	0.139321	0.100087	0.147916	0.168812	0	0.176419	0.396447	0.0813976	0.128431	0	0.107698	0.18307	0	0.1365	0.553882	0.110018	0.0882917	0.106476	0.119179	0.114911	0.132628	0.289173	0.121338	0.0924106	MPP_only
Esco2	0	0.391261	0	0.90918	0.301259	0.549073	0.00737281	0.00423658	0.0668688	0.573782	0.341502	0.382809	0	0.0017823	0.00928449	0.0119782	0.278477	0	0.293047	0.0936039	0	0	0	0.52005	0.0522366	0.352336	0.34666	0.195691	0.00496865	0.00627254	0.436223	0.0649225	0.42185	0.349007	0.0593964	0.00464906	0	MPP_only
Esyt2	0.033547	0.139596	0	0	0.0984884	0.229671	0.0876459	0.106816	0.120145	0.208742	0	0.143382	0	0.135066	0.193741	0.156559	0.23329	0	0.201549	0.211041	0.196816	0.171455	0.271308	0.193096	0.126831	0	0.13999	0.0768278	0.170071	0.188585	0.228917	0.144128	0.185107	0.170432	0.277152	0.165218	0.201215	MPP_only
Etv3	0.331812	0.183401	0.177517	0	0.142035	0.155528	0.131814	0.278636	0.316121	0.179104	0	0.143604	0	0.142442	0.359529	0.272896	0.263239	0	0.200799	0.261587	0.146161	0.322697	0.352215	0.186229	0.26306	0	0.141474	0	0.192407	0.31833	0.22009	0.415929	0.367484	0.177755	0.0748043	0.268438	0.334372	MPP_only
Evi2	0	0.0798605	0	0	0.0366471	0.0326727	0.0536635	0.0476989	0.236777	0.160552	0	0.0634273	0	0.115809	0.093904	0.0490556	0.0696348	0.32109	0.0433351	0.0877872	0.071163	0.055826	0.249045	0.125705	0.053773	0.612356	0.0947401	0	0.0954247	0.100288	0.184189	0.0746697	0.099105	0.104045	0.163203	0.124511	0.106493	MPP_only
Evi5	0	0.120956	0	0	0.102735	0.0326727	0.136438	0.173944	0.187606	0.140513	0.379251	0.105101	0	0.170156	0.194167	0.110651	0.102882	0.758884	0.0738681	0.0731714	0.0583529	0.108705	0.138072	0.0931189	0.092612	0	0.0801639	0	0.156827	0.170897	0.140858	0.0917152	0.0735267	0.116763	0.119178	0.137788	0.20838	MPP_only
Exoc3	0.404978	0.433244	0.355998	0.401521	0.365752	0.30784	0.375841	0.420369	0.413111	0.372356	0	0.381867	0.227015	0.37286	0.360733	0.305979	0.339388	0	0.255831	0.221461	0.314185	0.364497	0.717492	0.398047	0.502486	0.612356	0.338599	0	0.307748	0.315961	0.406728	0.32227	0.380932	0.33845	0.258454	0.333611	0.355659	MPP_only
Exoc8	0.0879726	0.0707245	0	0	0.0683792	0	0.0742908	0.0632542	0	0.0491114	0	0.0612694	0.227015	0.0600949	0.055126	0.0295283	0.0373565	0.32109	0.0215889	0.0225616	0	0.0129796	0.133236	0.0521978	0	0	0.0644579	0.0769661	0.0446052	0.0403372	0.061017	0.0341079	0.0408946	0.0505363	0.0891347	0.0745914	0.0436409	MPP_only
Exog	0.0709541	0.0814187	0.0783793	0	0.0740955	0	0.062289	0.0639884	0	0.0590357	0.379251	0.0921055	0.227015	0.046396	0.0350289	0.0240815	0.0383971	0	0.0434298	0.0103611	0.055291	0.0251383	0.133236	0.0651726	0.0832985	0	0.0710551	0	0.0606953	0.0414515	0.0690931	0.046165	0.0616078	0.0633595	0.0377629	0.0526793	0.0405825	MPP_only
Exosc10	0.203841	0.327333	0.256861	0	0.313455	0.223486	0.27691	0.245351	0.166782	0.271352	0.542532	0.267055	0.227015	0.207657	0.248691	0.2622	0.34619	0	0.328506	0.199062	0.280036	0.26061	0.341748	0.309549	0.168618	0.352336	0.30782	0.252035	0.209978	0.186967	0.329728	0.273613	0.361373	0.323811	0.248937	0.229687	0.225849	MPP_only
Ezr	0.445227	0.54508	0	1.24429	0.603018	0.925887	0.448997	0.304975	0.206261	0.567445	0.720752	0.576614	1.10696	0.447572	0.363449	0.497354	0.666896	0.32109	0.668291	0.67662	0.569385	0.308956	0	0.566353	0.429313	0.989372	0.597121	0.78433	0.431873	0.35983	0.498054	0.444827	0.61456	0.579093	0.637866	0.473681	0.35441	MPP_only
F2rl3	0.123341	0.244503	0	0.687225	0.212915	0.124315	0.192731	0.215092	0.0570411	0.16014	0.379251	0.173926	0.227015	0.156767	0.127674	0.0785117	0.0719835	0	0.132383	0.012465	0.055282	0.135796	0.180734	0.126896	0.115454	0	0.151311	0	0.157488	0.147307	0.132335	0.0564768	0.0680382	0.118242	0.0356317	0.15024	0.123821	MPP_only
F630028O10Rik	0.0788348	0.073803	0	0	0.06185	0.496154	0.0649847	0.0357993	0	0.0902983	0.379251	0.108026	0.621911	0.170217	0.0521545	0.0635741	0.0299321	0	0.0473904	0.216588	0.082264	0.0217467	0.180734	0.101624	0.159095	0	0.124037	1.13816	0.176363	0.0302942	0.0676705	0.0351301	0.0214986	0.112694	0.680435	0.149848	0.0403523	MPP_only
Faap24	0.033547	0.264109	0.0783793	0	0.128741	0.0986423	0.10653	0.0776449	0	0.201505	0	0.130919	0.227015	0.0786798	0.0838118	0.0644015	0.0791072	0	0.0586443	0.0980677	0.0909881	0.0371677	0.133236	0.202148	0.0436273	0	0.123665	0.231719	0.0742406	0.0848058	0.191656	0.0573269	0.160187	0.0831213	0.147442	0.0937533	0.0757193	MPP_only
Fads1	0	0.0863367	0	0	0.138272	0.10714	0.0924135	0.0921741	0	0.0982799	0	0.148614	0	0.0669218	0.154223	0.142297	0.160687	0	0.202025	0.133724	0.0464995	0.223617	0	0.123935	0	0.352336	0.148398	0	0.0825598	0.134485	0.169766	0.074593	0.0923978	0.167406	0.111531	0.0751929	0.144036	MPP_only
Fam117a	0.547062	0.587553	0.757306	1.24429	0.527387	0.504284	0.693855	0.366717	0.544281	0.586362	1.0829	0.564306	0.621911	0.716748	0.443725	0.546197	0.546713	0	0.476359	0.577316	0.809676	0.310984	0.47982	0.658103	0.600281	0.818528	0.606389	0.630603	0.772261	0.428905	0.702036	0.586244	0.599581	0.617978	0.756849	0.785824	0.371009	MPP_only
Fam120b	0.303205	0.184145	0	0	0.158188	0.248264	0.169792	0.16314	0	0.239575	0	0.154566	0	0.228721	0.179187	0.153364	0.166486	0	0.130556	0.127773	0.19877	0.138658	0	0.229159	0.129503	0.352336	0.199922	0.0769661	0.247057	0.220307	0.226304	0.161416	0.169887	0.178889	0.128316	0.233323	0.19291	MPP_only
Fam173a	0.599688	0.634292	0.404831	0	0.557939	0.70358	0.4976	0.376173	0.373967	0.758224	0.720752	0.655311	0.38257	0.648259	0.445896	0.473767	0.69309	0.563756	0.549693	0.534226	0.545762	0.393662	0.630609	0.773497	0.561721	0.989372	0.645571	0.889736	0.640304	0.50096	0.713528	0.464202	0.596211	0.639469	0.612521	0.552759	0.470577	MPP_only
Fam208a	0.252742	0.282813	0	0	0.236307	0.234472	0.22535	0.264219	0.364792	0.397976	0.341502	0.229872	0.394895	0.329059	0.302531	0.19252	0.250579	0	0.176928	0.18541	0.133833	0.245194	0.161014	0.356022	0.342134	0.352336	0.257086	0.468285	0.332793	0.299748	0.436889	0.262872	0.330628	0.303681	0.260291	0.393312	0.36342	MPP_only
Fam210a	0.033547	0.271803	0.209267	0	0.250934	0.0402551	0.208047	0.15307	0	0.161655	0	0.249575	0	0.195147	0.129962	0.129498	0.138696	0	0.1707	0.13654	0.169697	0.12067	0	0.17978	0.170937	0	0.199702	0.212559	0.185886	0.127651	0.212307	0.174075	0.186276	0.241801	0.248833	0.157091	0.131864	MPP_only
Fam219b	0	0.189313	0	0	0.226413	0.294648	0.182056	0.192591	0	0.125295	0	0.165015	0	0.122051	0.169782	0.104486	0.0981511	0	0.117439	0.0806524	0.105546	0.140022	0.180734	0.137903	0.0304697	0	0.17133	0.172954	0.128587	0.127819	0.162394	0.101144	0.128501	0.136728	0.12055	0.110031	0.0923074	MPP_only
Fam221a	0	0.0163885	0	0	0.0378143	0	0.00733954	0.00775609	0	0.0223777	0	0.0527021	0	0.0117154	0.014441	0.0227673	0.0462549	0	0.0871502	0.0366641	0	0.0282085	0	0.0477743	0.0304697	0	0.0478256	0.172954	0.0149701	0.015875	0.0256588	0.0175275	0.0371918	0.0671766	0.0310841	0.0190173	0.0192609	MPP_only
Fam234b	0.0897942	0.0419774	0.177517	0	0.0634301	0.0532417	0.0385711	0.0315225	0.0901543	0.0305653	0	0.0447279	0	0.0397612	0.0230381	0.0838959	0.0842785	0	0.0771171	0.101207	0.0846749	0.0494722	0.161014	0.0369115	0.0396713	0	0.0291759	0	0.0499843	0.0333125	0.0485818	0.0415026	0.0444615	0.0643928	0.0444513	0.0660115	0.0472139	MPP_only
Fam26f	0.149475	0.184378	0	0	0.175182	0.173269	0.137237	0.171975	0	0.204114	0	0.171411	0.227015	0.214628	0.215299	0.110382	0.131067	0	0.110143	0.104006	0.22428	0.140737	0.693963	0.202438	0.3525	0	0.205168	0.0769661	0.208957	0.17946	0.256248	0.653234	0.624901	0.27805	0.147057	0.23629	0.27595	MPP_only
Fam32a	0.812341	0.721434	0.387749	0.401521	0.667596	0.488037	0.682223	0.710979	0.552981	0.833408	1.13495	0.712621	0.777465	0.813662	0.755513	0.624633	0.692043	0.32109	0.597888	0.621979	0.472499	0.730429	0.443198	0.808402	0.654098	0.818528	0.654116	0.858622	0.718446	0.812439	0.758108	0.577909	0.682496	0.682325	0.750877	0.739277	0.650529	MPP_only
Fam58b	0.262746	0.397457	0.565265	0.90918	0.364937	0.204228	0.357086	0.308579	0.330696	0.322947	0.341502	0.356206	0.227015	0.339906	0.28045	0.256646	0.27871	0.32109	0.253918	0.284979	0.274325	0.175829	0.133236	0.332756	0.414096	0.818528	0.353198	0.464706	0.299653	0.299001	0.313528	0.218284	0.241657	0.281005	0.157954	0.27706	0.244923	MPP_only
Fam69a	0.21316	0.224527	0.178481	0.401521	0.220525	0.289111	0.215729	0.165721	0.0668688	0.256395	0.379251	0.236177	0.227015	0.216015	0.201731	0.161074	0.163101	0	0.19605	0.243212	0.172638	0.0728448	0.180734	0.231981	0.104596	0.352336	0.244972	0.388079	0.220253	0.198986	0.182558	0.128826	0.15145	0.208161	0.23153	0.164651	0.1744	MPP_only
Fam83d	0	0.197319	0	0	0.00954548	0	0	0	0.0668688	0.235611	0	0.0135578	0	0	0	0.00214584	0.0591248	0	0.0123981	0.0298333	0	0	0	0.255994	0	0.352336	0.0224965	0	0	0.00361709	0.266634	0	0.123114	0.0135174	0	0	0.00242593	MPP_only
Fam96b	0.255612	0.362559	0.681496	0.687225	0.441965	0.419605	0.391983	0.401403	0.430609	0.446367	0.933919	0.458874	0.394895	0.38315	0.347881	0.293543	0.361066	0	0.289416	0.184923	0.469744	0.379205	0.532166	0.480796	0.339514	0	0.415584	0.358527	0.363657	0.357828	0.461129	0.461406	0.523885	0.398494	0.284059	0.386007	0.354951	MPP_only
Fam98b	0.410813	0.24669	0.178481	0	0.230535	0.116474	0.200709	0.227422	0.254406	0.220142	0	0.203128	0	0.142158	0.14408	0.216563	0.249691	0	0.255567	0.133219	0.136627	0.182842	0.449875	0.226056	0.279626	0	0.230568	0.252035	0.153151	0.150366	0.235332	0.238513	0.241238	0.23974	0.0226921	0.1818	0.213235	MPP_only
Fan1	0	0.0273716	0	0	0.0339117	0.0916425	0.0316459	0.0372823	0	0.0270953	0	0.0421969	0	0.0295764	0.0297813	0.0593425	0.0604508	0	0.038978	0	0.0496291	0.0601785	0	0.0409138	0	0	0.0336608	0	0.0503491	0.0419778	0.0474117	0.0159714	0.0124106	0.0258888	0.0191026	0.0322432	0.063256	MPP_only
Fastk	0.204782	0.162424	0.0783793	0	0.184753	0.193315	0.154953	0.165835	0	0.163403	0	0.210289	0.394895	0.196524	0.168426	0.125907	0.127692	0	0.156344	0.194623	0.102639	0.0972162	0	0.171049	0.306903	0	0.232027	0.349485	0.190395	0.167708	0.195751	0.136094	0.160154	0.157911	0.165694	0.148563	0.126534	MPP_only
Fastkd1	0.033547	0.140578	0	0	0.133548	0.0384008	0.139021	0.0754456	0.116632	0.0825685	0.341502	0.0757124	0	0.0732908	0.0608266	0.0473287	0.0428871	0	0.0450916	0	0.0283942	0.0491225	0	0.0710921	0	0	0.0978649	0	0.0997139	0.081729	0.0734007	0.0694001	0.067462	0.0876059	0.0483015	0.0967991	0.0609935	MPP_only
Fbxl15	0.107505	0.169137	0.0783793	0.401521	0.0941088	0	0.117886	0.115059	0	0.116962	0	0.13171	0	0.124465	0.102973	0.0921666	0.117043	0	0.0593027	0.072704	0.118566	0.0795401	0.133236	0.124784	0.0979763	0.352336	0.104882	0.0959884	0.096799	0.126993	0.121287	0.0984376	0.117034	0.105242	0.0536476	0.0979419	0.117438	MPP_only
Fbxo11	0.12152	0.175869	0.601838	0.401521	0.145054	0.217632	0.145297	0.165544	0.141986	0.20737	0	0.135178	0.227015	0.168683	0.213119	0.274226	0.276061	0	0.202142	0.255125	0.166596	0.160827	0.341748	0.185206	0.160485	0.352336	0.135955	0.116523	0.133562	0.168016	0.159967	0.139485	0.154195	0.148061	0.156107	0.161005	0.194718	MPP_only
Fbxo33	0.166127	0.149782	0	0.401521	0.103165	0.213679	0.0617273	0.116532	0.157023	0.151066	0	0.0952894	0	0.101511	0.155506	0.170907	0.193998	0	0.154191	0.0928378	0.168904	0.184607	0.31397	0.14758	0.0773387	0.352336	0.115342	0.135512	0.0819881	0.167637	0.157346	0.124906	0.154637	0.115809	0.111572	0.136402	0.155929	MPP_only
Fbxo46	0.0810236	0.0766874	0	0	0.0789453	0	0.0645364	0.0668287	0	0.0820811	0	0.0930062	0	0.101983	0.0507644	0.0380705	0.0769521	0	0.0493414	0.0361836	0.0279565	0.0518575	0	0.0811752	0.0396713	0.352336	0.0852463	0.116523	0.0725014	0.05523	0.105125	0.06381	0.0612739	0.0686637	0.180699	0.0902885	0.0642786	MPP_only
Fbxo5	0	0.636032	0	0	0.395404	0.72988	0.0697534	0.0422395	0	0.767877	0	0.448731	0	0.0648383	0.0529277	0.0581479	0.341997	0	0.346473	0.158147	0.134867	0.0258341	0	0.821467	0.101764	1.47684	0.46985	0.538835	0.0729507	0.0412113	0.697601	0.090111	0.363166	0.391207	0.0825922	0.0503119	0.0256117	MPP_only
Fbxw11	0.205909	0.138973	0.256861	0	0.131666	0.0668846	0.114247	0.140723	0.110198	0.144417	0	0.128025	0	0.133408	0.117114	0.167894	0.228578	0.32109	0.175052	0.12148	0.184578	0.173564	0.373848	0.172621	0.208616	0	0.130444	0	0.12331	0.121729	0.200186	0.168494	0.21603	0.192828	0.160301	0.151065	0.153161	MPP_only
Fbxw4	0.176261	0.155939	0.321561	0.401521	0.108621	0.0454007	0.156786	0.0790149	0.0668688	0.281837	0	0.165798	0.394895	0.294595	0.153618	0.115839	0.181545	0	0.110799	0.065901	0.203991	0.0798194	0.161014	0.28512	0.257071	0.818528	0.189284	0.252035	0.308782	0.164383	0.266387	0.114457	0.170314	0.167395	0.125089	0.315074	0.12461	MPP_only
Fbxw8	0	0.0987442	0	0	0.126656	0.0402551	0.107556	0.108963	0	0.102147	0.341502	0.126816	0	0.0712897	0.0937973	0.117383	0.142377	0	0.172926	0.100846	0.0934289	0.115435	0	0.0913335	0.0739814	0	0.102028	0.0768278	0.0707724	0.0931288	0.103004	0.0893905	0.121535	0.111887	0.119017	0.111635	0.118171	MPP_only
Fcho1	0.372654	0.461806	0	0.90918	0.35529	0.423965	0.334637	0.25454	0.528002	0.524431	0	0.413328	0	0.30721	0.24935	0.352192	0.612475	0.32109	0.435621	0.206457	0.324554	0.181922	0.31397	0.54978	0.18405	0.818528	0.40112	0.412658	0.325104	0.289365	0.615329	0.337766	0.605125	0.453698	0.299473	0.348764	0.281815	MPP_only
Fdps	0.443577	0.275263	0.387749	0	0.35738	0.688068	0.349993	0.28444	0.15154	0.191545	0.379251	0.316174	0.621911	0.216935	0.250808	0.254061	0.276831	0	0.413205	0.52216	0.258948	0.244234	0.150789	0.190546	0.205235	0.352336	0.304781	0.694552	0.199102	0.184592	0.143143	0.165182	0.135446	0.214325	0.376753	0.141136	0.107061	MPP_only
Ffar2	0.225042	0.340917	0.209267	0.90918	0.313409	0.156195	0.28269	0.163188	0	0.128349	0.921783	0.145067	0.394895	0.145095	0.0635233	0.0181128	0.0435813	0	0.0428466	0.0407504	0.0456597	0.0129159	0	0.233333	0.130265	0	0.143377	0.135731	0.146758	0.0651472	0.244545	0.483824	0.512922	0.193409	0.377454	0.167674	0.0609925	MPP_only
Fgd2	0.0709541	0.130048	0.178481	0	0.163111	0.575371	0.190986	0.0749124	0.306699	0.147617	0	0.157523	0.61275	0.254647	0.180938	0.142399	0.132551	0	0.120371	0.204604	0.178561	0.127489	0	0.144709	0.151724	0.818528	0.167275	0.0959884	0.266958	0.147991	0.166142	0.150649	0.116149	0.205165	0.251288	0.254974	0.107218	MPP_only
Fgfr1op2	0.414576	0.771005	0.537452	1.3774	0.698268	0.663934	0.766679	0.654993	0.658625	0.838796	1.19753	0.658787	0.99532	0.747631	0.638226	0.598268	0.729862	0.32109	0.610242	0.472796	0.875827	0.564352	0.212499	0.808929	0.5457	0.612356	0.679188	0.418902	0.723895	0.591254	0.805793	0.599639	0.706866	0.66884	0.681007	0.66855	0.570228	MPP_only
Fis1	0.629062	1.02814	0.748201	1.24429	0.978051	1.24516	0.973587	0.960476	1.08977	1.12281	1.06477	1.03534	1.55698	1.08906	1.01492	0.961248	1.07518	0.758884	0.952923	1.08286	1.01375	0.900986	1.27055	1.13703	1.07818	1.47684	1.05036	1.10105	1.11712	1.03451	1.01395	0.875726	0.955377	0.959589	1.18149	1.00425	0.893705	MPP_only
Flot1	0.720276	0.66151	0	1.24429	0.492688	0.52563	0.682326	0.697212	0.432232	0.404262	0	0.409519	0.991642	0.560134	0.504973	0.424828	0.424387	0	0.267504	0.458405	0.533254	0.440425	0.299086	0.424952	0.510136	0.818528	0.37424	0.0769661	0.542973	0.523802	0.52091	0.661337	0.622667	0.369262	0.500228	0.587381	0.574447	MPP_only
Flt3	0.706426	0.774899	0.387749	1.09071	0.682706	0.599352	0.827079	0.308555	0.911841	0.91152	0	0.753733	0.394895	1.04489	0.380223	0.933054	1.00298	0	0.712296	0.417383	1.16845	0.347872	0.635488	0.880762	0.466695	1.47684	0.79949	0.646136	1.10368	0.418668	1.09076	0.75574	0.95871	0.919241	0.309405	1.20353	0.453023	MPP_only
Fmnl1	0.322654	0.432779	0	0.401521	0.291688	0.262324	0.332154	0.266937	0.116632	0.519705	0.933919	0.339684	0.621911	0.395802	0.325738	0.499835	0.69558	0	0.459266	0.518939	0.496127	0.408419	0.369767	0.471191	0.306473	0.352336	0.343893	0.504158	0.411632	0.394162	0.578321	0.318744	0.481388	0.390726	0.246024	0.473265	0.413746	MPP_only
Foxk2	0.147105	0.174483	0	0	0.197835	0.0326727	0.146926	0.141909	0.403558	0.107164	0	0.138776	0.227015	0.0810441	0.0605582	0.109678	0.115459	0	0.169363	0.106616	0.10181	0.0965199	0.138072	0.0866926	0.166502	0	0.15217	0.0768278	0.0981436	0.0834274	0.0785575	0.115087	0.149504	0.172181	0.0667151	0.0769375	0.101371	MPP_only
Frmd6	0.123341	0.20063	0.490823	0	0.162642	0.0384008	0.137791	0.114504	0.0570411	0.090662	0	0.118058	0	0.0924203	0.0886852	0.176114	0.211747	0	0.162421	0.0678252	0.123951	0.131303	0.180734	0.126363	0.0832419	0	0.125803	0	0.126633	0.0939062	0.171189	0.223073	0.242137	0.186007	0.115711	0.177415	0.095828	MPP_only
Fth1	3.32986	3.00202	2.90549	3.05673	3.25639	2.98792	3.26207	3.27051	3.4073	3.0827	3.27352	3.25139	3.33974	3.22528	3.28193	3.49192	3.28643	1.71264	3.38162	3.08686	3.43167	3.35988	3.30022	2.99555	3.14527	2.83619	3.19191	2.89035	3.22672	3.30092	2.94759	3.05731	2.86707	3.1822	2.82981	3.20101	3.17849	MPP_only
Ftx	0.068451	0.0678807	0	0	0.0796754	0	0.0598578	0.0392206	0.0974522	0.0761636	0	0.0640811	0	0.0467652	0.0359516	0.0286728	0.0357666	0	0.0378794	0.0213748	0	0.0363667	0	0.0659492	0	0.352336	0.0622923	0	0.0420814	0.0353549	0.0754662	0.0321659	0.0667776	0.089142	0.0348434	0.0425388	0.0368542	MPP_only
Fut7	0.0810236	0.193554	0	0.687225	0.192568	0.230065	0.187025	0.0704351	0	0.254271	0.379251	0.250629	1.57075	0.274506	0.153681	0.164859	0.188804	0	0.160164	0.354861	0.216783	0.0789858	0	0.299925	0.33731	0	0.294056	0.255726	0.359265	0.168893	0.287555	0.0562482	0.113232	0.240226	0.516521	0.257689	0.158332	MPP_only
Fxyd5	1.94504	1.63587	1.44962	1.59995	1.80569	1.85317	1.86034	1.71105	2.0187	1.66385	1.26665	1.76277	2.18323	1.81455	1.73173	1.74034	1.57654	0.32109	1.66688	2.0353	1.4542	1.64415	1.98136	1.61307	1.81002	1.99277	1.78104	1.72226	1.8106	1.68503	1.4978	1.58117	1.49903	1.70158	1.79382	1.77643	1.59279	MPP_only
Fyn	0	0.214421	0	0	0.224681	0.259977	0.158021	0.1866	0.0974522	0.190068	0.341502	0.185827	0.61275	0.159534	0.197831	0.218911	0.223554	0	0.265616	0.373281	0.175429	0.228141	0.422097	0.214936	0.255464	0	0.203741	0.212511	0.1839	0.176711	0.221586	0.191006	0.191282	0.214964	0.217124	0.216347	0.211721	MPP_only
G2e3	0	0.424949	0	0	0.0836838	0.154412	0.0757907	0.0840296	0	0.569319	0	0.0884028	0	0.0635925	0.0842035	0.0765285	0.209508	0	0.0649059	0.103064	0.0698581	0.0705187	0	0.540943	0.262246	1.13524	0.120773	0.135731	0.0869618	0.0689493	0.639488	0.0831976	0.303534	0.10722	0.104009	0.0944855	0.096255	MPP_only
Gab2	0.0879726	0.0849456	0.177517	0	0.0661903	0.0402551	0.0729137	0.0618803	0.0999129	0.0687729	0	0.0396967	0	0.0308952	0.0481665	0.0857872	0.0795871	0	0.0821916	0.0634157	0.0413073	0.131479	0.133236	0.0550276	0.045743	0	0.043055	0	0.0434313	0.0529783	0.0924277	0.0747374	0.0886901	0.0618781	0.135478	0.0503655	0.0721517	MPP_only
Gabarapl1	0.390604	0.37319	0.499078	0.687225	0.363114	0.30654	0.509448	0.655201	1.02571	0.511116	0.341502	0.368124	0	0.497227	0.651249	0.441097	0.418133	0	0.342338	0.307261	0.377129	0.747723	0.629009	0.487264	0.476063	0	0.376356	0.172816	0.540537	0.699055	0.437629	0.496869	0.353255	0.345981	0.298909	0.530333	0.67427	MPP_only
Ganab	0.172054	0.363436	0.0783793	0.401521	0.262502	0.296572	0.247614	0.230158	0.273655	0.363836	0.933919	0.305975	0.227015	0.250891	0.22716	0.268888	0.437413	0.32109	0.385747	0.411847	0.321272	0.260849	0	0.343262	0.370921	0	0.367161	0.651546	0.259999	0.184126	0.40104	0.282203	0.422465	0.354087	0.279356	0.278491	0.245438	MPP_only
Gas2l3	0.033547	0.486361	0	0.401521	0.113374	0.14494	0.0263581	0.0814925	0	0.569979	0	0.146644	0	0.0576341	0.0726003	0.0852515	0.249462	0	0.148814	0.0930487	0.0454861	0.223032	0	0.554043	0.0436273	0	0.144506	0	0.059548	0.113033	0.634789	0.0283482	0.228307	0.125568	0.0910294	0.0488607	0.113478	MPP_only
Gba2	0.0760195	0.0721427	0.178481	0	0.0534847	0	0.0606977	0.0637561	0.173614	0.0988417	0.379251	0.0764668	0	0.107617	0.0755819	0.0520179	0.07053	0	0.0483949	0.0110992	0.161112	0.0700828	0	0.100897	0.0739814	0.352336	0.0836029	0.0768278	0.0854145	0.105847	0.091341	0.0513369	0.0881743	0.0915082	0.0975002	0.0950881	0.113347	MPP_only
Gbp3	0.144471	0.155808	0.386784	0.401521	0.165758	0.115142	0.113458	0.129641	0.0570411	0.195102	1.29071	0.177016	0.227015	0.114763	0.198658	0.128773	0.132391	0	0.132872	0.138091	0.178643	0.145728	0	0.169564	0.767457	0.612356	0.216744	0.414779	0.166186	0.157225	0.269227	1.19294	1.05836	0.244942	0.272033	0.197932	0.358649	MPP_only
Gbp5	0	0.0855851	0.386784	0.687225	0.0317791	0	0.0435536	0.0609277	0	0.114267	0	0.0480817	0	0.0761995	0.122899	0.0400712	0.079578	0	0.0339255	0.0635442	0.108614	0.095162	0	0.0907502	1.03009	0	0.0457676	0	0.0827526	0.11276	0.38375	2.02409	1.92205	0.255915	0.313385	0.275294	0.570834	MPP_only
Gbp9	0	0.00166652	0	0	0.00534658	0	0.00739287	0.0252068	0	0.00264299	0	0.00211856	0	0.0129986	0.0466891	0.00437517	0.00407759	0	0	0	0	0.0361563	0	0.00982604	0	0.989372	0.0136085	0	0.0156662	0.0471417	0.0175918	0.255019	0.155105	0.0136472	0	0.0148208	0.0867929	MPP_only
Gcfc2	0	0.116927	0.386784	0.401521	0.153	0.0995573	0.129692	0.0996818	0.0668688	0.116867	0.379251	0.135284	0.621911	0.133116	0.116395	0.0799965	0.0858784	0	0.0829496	0.0181596	0.113826	0.0779086	0.161014	0.105411	0.299049	0	0.133226	0	0.100574	0.0998111	0.128885	0.0738485	0.0725878	0.140378	0.10979	0.0927853	0.127568	MPP_only
Gdpgp1	0.0879726	0.0496311	0	0	0.0606932	0.0611382	0.0716222	0.0485452	0	0.0508473	0	0.0572491	0	0.102	0.052101	0.0327638	0.0299212	0	0.0367758	0	0	0.0325888	0.294251	0.0432622	0.070141	0	0.0755227	0.0769661	0.0593717	0.0344912	0.0551752	0.025627	0.0400564	0.0801875	0.0506154	0.0760567	0.0327093	MPP_only
Gen1	0	0.189075	0	0	0.0836387	0.0578891	0.00423975	0.00209714	0.0999129	0.200273	0	0.088622	0	0.0211558	0.00627875	0.012115	0.0968021	0	0.0641552	0.08537	0	0	0	0.219082	0.0609687	0.612356	0.0878135	0	0.00385054	0.0158441	0.262988	0.0245491	0.171115	0.103407	0.111299	0.00553625	0.00803302	MPP_only
Gfi1	0.0788348	0.155669	0.209267	0	0.115365	0	0.152661	0.12626	0.0570411	0.164809	0.542532	0.149854	0	0.182354	0.133339	0.0882279	0.147915	0	0.0726886	0.0800941	0.165707	0.0780097	0	0.188129	0	0	0.117435	0.172954	0.194496	0.118587	0.190574	0.0686856	0.0850975	0.116123	0.375593	0.152451	0.133751	MPP_only
Gfod1	0.237447	0.0956179	0	0	0.0636495	0.152781	0.101357	0.0632098	0.1759	0.0621515	0	0.0807163	0.61275	0.0708692	0.073424	0.233738	0.298548	0	0.185305	0.205498	0.177685	0.113294	0.180734	0.0936575	0.158368	0	0.0751246	0.195691	0.0779746	0.0785892	0.0874649	0.0286354	0.0454096	0.0782815	0.143532	0.0722224	0.0603614	MPP_only
Gfod2	0.234682	0.111191	0.178481	0.401521	0.0751081	0	0.0938333	0.0649118	0	0.048176	0	0.0734631	0	0.0589422	0.0603778	0.0376752	0.0483655	0	0.0263218	0.0228261	0.0269448	0.0255164	0.161014	0.0483968	0.0436273	0	0.0608996	0	0.0578859	0.0594792	0.0566153	0.0665746	0.0767838	0.0716156	0.0405997	0.0455119	0.0721996	MPP_only
Ggnbp2	0.576532	0.5835	0.643644	0	0.55744	0.6192	0.547044	0.564137	0.286927	0.58934	0.592418	0.487505	0.38257	0.599948	0.544054	0.61331	0.643318	0.32109	0.564201	0.585473	0.555497	0.625689	0.664018	0.60898	0.624723	0.352336	0.499721	0.464977	0.498403	0.526714	0.591835	0.475433	0.59411	0.575326	0.542714	0.541945	0.581614	MPP_only
Ggta1	0.201207	0.165608	0	0.401521	0.140949	0.154548	0.139828	0.0871026	0.208855	0.217808	0.379251	0.136032	0	0.171171	0.0708313	0.195251	0.261819	0	0.201866	0.0899481	0.148798	0.0821852	0.133236	0.210519	0.0396713	0	0.180795	0.242142	0.152023	0.0636674	0.237722	0.0839706	0.147109	0.177846	0.0650275	0.177437	0.117485	MPP_only
Gimap7	0	0.0695708	0	0	0.0630703	0	0.0657427	0.0406714	0	0.130787	0	0.0907136	0	0.143492	0.0574515	0.0491966	0.0741961	0	0.0483894	0.0110992	0.167883	0.024837	0	0.101717	0.114023	0.352336	0.122541	0	0.128223	0.0358833	0.119022	0.0419685	0.0708761	0.0937098	0	0.103658	0.0551279	MPP_only
Gimap8	0	0.0471331	0.177517	0	0.0288181	0	0.0676742	0.114285	0	0.10657	0	0.0408911	0	0.109725	0.159904	0.0788702	0.0535522	0	0.0314592	0.0089003	0.0551637	0.164848	0	0.0778418	0.114023	0	0.0612168	0	0.112116	0.195858	0.108125	0.111406	0.0918897	0.0487044	0	0.117437	0.200955	MPP_only
Git1	0.202195	0.161788	0.0783793	0	0.187234	0.134761	0.15879	0.142251	0.212695	0.14364	0	0.127333	0.38257	0.0655948	0.141735	0.143469	0.161022	0	0.178369	0.0696171	0.13919	0.145463	0.474985	0.110918	0.082116	0	0.133769	0.153794	0.127276	0.125438	0.151765	0.0896467	0.127231	0.146878	0.123033	0.10002	0.129863	MPP_only
Glmp	0.0709541	0.25241	0.458759	0.401521	0.217413	0.18657	0.270421	0.281464	0.33504	0.363062	0.341502	0.333437	0.839766	0.363869	0.384486	0.261284	0.362446	0.32109	0.258613	0.473376	0.401691	0.304933	0.422097	0.324318	0.354603	0	0.307417	0.552943	0.317261	0.375874	0.339775	0.258193	0.297081	0.269843	0.378981	0.323251	0.34391	MPP_only
Gm10036	0.230813	0.15639	0.177517	0.401521	0.174336	0.0384008	0.200523	0.152406	0.110198	0.170068	0	0.179145	0	0.181487	0.181063	0.0924754	0.089009	0	0.0726544	0.0991184	0.149575	0.0999011	0	0.202514	0.157339	0	0.186412	0.172954	0.159227	0.191131	0.15839	0.161874	0.166909	0.156833	0.120373	0.172017	0.143116	MPP_only
Gm10076	0.654801	0.759188	0.49396	0.401521	0.788066	1.0052	0.756974	0.684121	0.627456	0.865809	0.542532	0.819956	0	0.736675	0.741171	1.71631	1.82424	1.56576	1.80339	1.80848	1.6281	1.70566	0.819615	0.985345	0.823222	0.818528	0.903225	0.863649	0.84512	0.785219	1.03953	0.856496	0.92715	0.995692	0.918099	0.890157	0.830772	MPP_only
Gm10384	0.0675525	0.0702837	0.178481	0	0.0857837	0	0.112139	0.0714351	0.1835	0.084758	0.379251	0.0707717	0	0.177706	0.101126	0.046989	0.0212479	0	0.0349038	0.0288433	0.0999296	0.0315658	0	0.079855	0.0866939	0	0.0997477	0.0769661	0.155127	0.0837154	0.0901238	0.027844	0.014841	0.087512	0.0368023	0.13335	0.0580654	MPP_only
Gm11361	0	0.05335	0	0	0.0376205	0	0.0459494	0.0371382	0.0668688	0.0439312	0	0.0697919	0	0.0455887	0.0447708	0.0249267	0.0329669	0	0.0236497	0.0096393	0.0464995	0.0407819	0.180734	0.0489615	0.0865402	0	0.0644857	0	0.0694798	0.0772016	0.0483573	0.0450825	0.0467105	0.0424747	0.0203974	0.0416124	0.0368401	MPP_only
Gm11772	0	0.0205771	0	0	0.0301291	0.280198	0.0594928	0.0454042	0.214025	0.0212939	0.341502	0.0271192	0	0.0295894	0.0231705	0.0692295	0.0415915	0	0.038733	0.0758216	0.0813262	0.0632062	0.138072	0.0286942	0.0938534	0.352336	0.0217917	0	0.050016	0.0285031	0.0563011	0.10008	0.16979	0.0472503	0.0765801	0.0814769	0.0737195	MPP_only
Gm12185	0	0.0221742	0	0	0.00853655	0	0.0116414	0.0233301	0	0.0225866	0	0.0159628	0	0.0365384	0.0510401	0.00745634	0.00882947	0	0.00666676	0.0096393	0.038942	0.0130893	0	0.0248739	0.175746	0.352336	0.0288403	0	0.0258223	0.0652595	0.0538021	0.43316	0.40697	0.0599939	0.032891	0.0615689	0.165823	MPP_only
Gm12216	0.370354	0.268985	0.387749	0	0.174002	0.0532417	0.263927	0.315933	0.262845	0.20775	0.341502	0.266636	0.227015	0.393638	0.331855	0.226349	0.218066	0	0.156436	0.0772464	0.151731	0.213102	0.161014	0.248518	0.304497	0.352336	0.201707	0.116523	0.305719	0.265929	0.239346	0.307673	0.372322	0.208394	0.0706553	0.308786	0.307666	MPP_only
Gm13012	0.0788348	0.079834	0	0.401521	0.0901729	0	0.110987	0.12775	0.214084	0.133937	0	0.110287	0	0.143046	0.154945	0.110905	0.0875759	0	0.0868106	0.0904083	0.172176	0.0840681	0	0.120519	0.100642	0	0.111458	0.29953	0.190124	0.129766	0.104871	0.0957804	0.122048	0.100603	0.108981	0.150654	0.15444	MPP_only
Gm13212	0.0586226	0.0923196	0	0	0.0576727	0	0.0997588	0.112694	0	0.121416	0	0.0751828	0	0.143601	0.11437	0.0772828	0.0926935	0	0.0636351	0.0968551	0.0283942	0.108794	0.288861	0.0952026	0	0	0.0720147	0.231719	0.134631	0.114569	0.115365	0.0887862	0.0867651	0.0756948	0.0893671	0.136498	0.16484	MPP_only
Gm15261	0.0810236	0.0847778	0.209267	0	0.0949914	0.106539	0.145586	0.195688	0.0570411	0.108607	0	0.0948389	0.227015	0.135028	0.149996	0.0642973	0.0258471	0	0.0373723	0.0340492	0.0801247	0.0889616	0	0.116167	0.17097	0	0.0953493	0.116523	0.162277	0.123692	0.0892907	0.0415866	0.0223427	0.0727558	0.0556724	0.110519	0.113852	MPP_only
Gm16152	0.40042	0.260991	0.489544	0.401521	0.274108	0.0402551	0.255694	0.226602	0.354622	0.321195	0.341502	0.23524	0.227015	0.257956	0.217162	0.176227	0.221605	0	0.140809	0.0919683	0.171021	0.13635	0.133236	0.253035	0.120616	0	0.216102	0	0.273913	0.212116	0.21196	0.184557	0.229019	0.194605	0.0436873	0.253842	0.189217	MPP_only
Gm16740	0	0.0249904	0	0	0.0268435	0	0.0207245	0.0315094	0.206786	0.0247168	0	0.0372711	0.227015	0.0394319	0.0438317	0.0596919	0.0754257	0	0.0380355	0.0842471	0.026168	0.0724631	0	0.0455475	0	0	0.0302472	0	0.0437167	0.0535823	0.0637599	0.0282698	0.0494576	0.0438314	0	0.0425956	0.0420564	MPP_only
Gm20604	0	0.0909714	0	0	0.118347	0	0.0605006	0.0805507	0	0.0539508	0	0.112689	0	0.0535989	0.0701487	0.107497	0.133766	0	0.158467	0.0946823	0.0757637	0.0829066	0	0.0945441	0.0304697	0	0.125304	0	0.068326	0.089178	0.135561	0.103476	0.147104	0.103805	0.0191026	0.0854634	0.0806714	MPP_only
Gm20696	0.068451	0.119663	0	0	0.0895413	0.156829	0.089274	0.0775193	0.0974522	0.162999	0	0.130576	0	0.163676	0.113737	0.0870581	0.0914219	0	0.0755706	0.0921632	0.0929338	0.108091	0.311803	0.173329	0	0.612356	0.137866	0.165176	0.152401	0.0853527	0.170445	0.0816496	0.109389	0.123931	0.0226921	0.146188	0.149039	MPP_only
Gm26532	0.390551	0.089589	0	0	0.0681942	0	0.0572994	0.329434	0	0.0872116	0	0.0662002	0	0.0807746	0.35911	0.180832	0.108866	0	0.0808987	0.214607	0.165499	0.318095	0.452042	0.0629429	0.036373	0	0.0734805	0	0.0575532	0.423867	0.0686142	0.0944313	0.0746098	0.0504723	0.0973703	0.0705935	0.281427	MPP_only
Gm26597	0.159858	0.0317234	0	0	0.0268935	0	0.0477874	0.0194528	0	0.0434659	0	0.0433096	0	0.0607897	0.0166458	0.0945632	0.0802169	0	0.0681962	0.0339496	0.0335706	0.06171	0	0.0279451	0	0	0.0500025	0	0.0477768	0.0199501	0.0467742	0.0176376	0.0393245	0.0530731	0	0.0581141	0.0192997	MPP_only
Gm26735	0.108506	0.0987044	0	0	0.0631222	0	0.102103	0.106641	0	0.0850971	0.379251	0.0645212	0	0.140045	0.0972138	0.0600921	0.0484462	0	0.021687	0.0617358	0.0277798	0.061428	0.180734	0.107302	0.0949745	0	0.0805135	0	0.130959	0.085465	0.0732231	0.0755867	0.0645187	0.0491375	0.0454524	0.0900006	0.0766868	MPP_only
Gm26782	0.262359	0.113769	0.499078	0	0.135215	0.125694	0.167662	0.173766	0.0570411	0.110216	0.341502	0.184937	0.394895	0.227095	0.20004	0.128437	0.11969	0	0.0928346	0.125309	0.140129	0.164966	0.369767	0.137388	0.053773	0	0.134149	0.195691	0.239822	0.168242	0.158297	0.129439	0.113705	0.148928	0.213557	0.235095	0.175722	MPP_only
Gm32036	0.033547	0.0487747	0	0	0.0538508	0.078173	0.0696537	0.0674657	0.0999129	0.0991665	0	0.075709	0	0.0780201	0.0732992	0.0409036	0.0511171	0	0.0389773	0.044497	0.026168	0.0247712	0	0.0982671	0	0	0.0945274	0.0769661	0.0799083	0.07798	0.0870045	0.0727921	0.0866955	0.0600842	0.109103	0.0837457	0.0831529	MPP_only
Gm32856	0.0760195	0.10235	0	0	0.0852961	0	0.101863	0.0978337	0	0.0493035	0	0.0769161	0	0.0692006	0.0524691	0.0283226	0.021031	0	0.0332876	0.0393656	0.0223967	0.0338468	0.150789	0.0308711	0.092612	0	0.0682792	0	0.0800915	0.0638619	0.060684	0.0476753	0.0503373	0.0632543	0.053507	0.0663481	0.0472582	MPP_only
Gm340	0.12152	0.055669	0	0	0.0504239	0	0.069446	0.0509689	0	0.0412509	0	0.0472202	0	0.0492644	0.0221147	0.0691186	0.0754781	0	0.0847659	0.0239261	0.0605154	0.0532062	0.274098	0.0469915	0	0	0.0470823	0.116523	0.0431978	0.0354014	0.0531779	0.056271	0.0674652	0.0495345	0.0801087	0.0495915	0.0450082	MPP_only
Gm3550	0	0.120151	0	0	0.0237019	0	0.0105388	0	0	0.190836	0	0.0266969	0	0.00722545	0.00457807	0.00417654	0.0642666	0	0.0148831	0.0581264	0	0	0	0.171475	0	0.352336	0.0222768	0	0.00996414	0.00773661	0.180409	0.0105974	0.0466205	0.0356603	0.0345346	0.0113457	0.00554331	MPP_only
Gm3604	0.0760195	0.0451435	0	0	0.0583529	0.0729278	0.0267281	0.0224383	0	0.025641	0	0.0666916	0	0.0415102	0.0244543	0.00961145	0.0161383	0	0.0198914	0	0	0	0	0.0518725	0.0760442	0	0.0579168	0.0768278	0.0513509	0.0237706	0.0620615	0.019832	0.0279618	0.0487267	0.0376003	0.0281192	0.0436757	MPP_only
Gm36445	0	0.0311625	0	0	0.0369286	0	0.0258158	0.0360128	0	0.0238405	0	0.0355714	0	0.0227267	0.0172294	0.0402962	0.0524774	0	0.0465088	0.0416773	0.0300864	0.0403261	0	0.0380309	0	0	0.0409699	0.116523	0.025232	0.0249016	0.0396662	0.019005	0.0382817	0.0352969	0	0.0175	0.017905	MPP_only
Gm37494	0.0760195	0.111032	0	0	0.0825403	0	0.0638429	0.0993764	0.116632	0.176869	0	0.0660486	0	0.11641	0.123568	0.0654765	0.132406	0	0.0673561	0.0169046	0.138652	0.0729831	0.180734	0.13785	0.166357	0	0.0809393	0	0.110966	0.109006	0.13918	0.0796941	0.0842146	0.0900254	0.0941788	0.106255	0.132159	MPP_only
Gm4070	0.0675525	0.0519312	0.177517	0	0.0266683	0	0.0402963	0.0240649	0	0.0484508	0	0.0386223	0	0.0415343	0.0603431	0.0207436	0.0294342	0	0.0122635	0.0195997	0.0443309	0.0506298	0	0.0564007	0.122599	0.818528	0.0365283	0	0.061328	0.0405476	0.127499	0.357924	0.315339	0.0970028	0.0423444	0.188579	0.21266	MPP_only
Gm42047	0.033547	0.322762	0	0.401521	0.121674	0.18723	0.0391846	0.0451166	0	0.432227	0	0.161778	0.227015	0.0767322	0.0541957	0.0879082	0.462765	0	0.170352	0.207116	0.120369	0.0534241	0	0.432534	0.117951	1.26252	0.190383	0.391457	0.0852264	0.0659376	0.455435	0.117329	0.469249	0.118465	0.0371624	0.0905768	0.0548046	MPP_only
Gm43568	0	0.0338141	0	0	0.0130566	0	0.0292816	0.0470146	0.120145	0.0637018	0	0.0584375	0	0.0649472	0.113764	0.0417322	0.0352812	0	0.0218301	0	0.130285	0.0331117	0	0.0723213	0	0.352336	0.0413339	0	0.0768458	0.101499	0.0847925	0.0259725	0.0143551	0.0448003	0	0.0617935	0.066067	MPP_only
Gm44067	0.122363	0.0229609	0	0	0.0326239	0	0.0305796	0.00328803	0	0.038805	0	0.0448663	0.227015	0.0409976	0.00327396	0.0525306	0.0723353	0	0.0738214	0.0617026	0.0828448	0	0	0.0345406	0.107318	0	0.0305956	0	0.0408624	0.00410017	0.0920168	0.0243233	0.0365146	0.0744114	0.0607304	0.0713068	0.00996371	MPP_only
Gm45620	0	0.0471258	0	0	0.0194744	0	0.0240963	0.0345422	0.0999129	0.0708294	0	0.0310683	0	0.0656056	0.0506576	0.0343322	0.0424633	0	0.0141689	0	0.029114	0.0544538	0	0.0692479	0.0436273	0	0.0312204	0	0.0553687	0.0515488	0.0590235	0.018949	0.00656962	0.0235266	0	0.0451306	0.0479305	MPP_only
Gm45716	0.0709541	0.0568255	0	0	0.0758434	0.0532417	0.0464553	0.0462085	0	0.0431112	0	0.0692426	0	0.0539213	0.0304388	0.0911896	0.0798124	0.563756	0.0853236	0.116894	0.0535935	0.0273075	0	0.0416032	0.036373	0	0.0552043	0.270317	0.0305483	0.0305169	0.0510744	0.0229493	0.0462023	0.0600269	0.0743934	0.0618213	0.0431628	MPP_only
[truncated: 2,554 more rows]

## Sheet: GCSF_1.5
	GCSF_Acute-Activation	GCSF_Cell-cycle	GCSF_Interferon	GCSF_Interferon cell-cycle	GCSF_Metabolism	GCSF_Myeloid	GCSF_Primed	GCSF_Primitive	ct_Acute-Activation	ct_Cell-cycle	ct_Interferon	ct_Metabolism	ct_Myeloid	ct_Primed	ct_Primitive	dmPGE2_Acute-Activation	dmPGE2_Cell-cycle	dmPGE2_Interferon	dmPGE2_Metabolism	dmPGE2_Myeloid	dmPGE2_Primed	dmPGE2_Primitive	indo_Acute-Activation	indo_Cell-cycle	indo_Interferon	indo_Interferon cell-cycle	indo_Metabolism	indo_Myeloid	indo_Primed	indo_Primitive	pIC_Cell-cycle	pIC_Interferon	pIC_Interferon cell-cycle	pIC_Metabolism	pIC_Myeloid	pIC_Primed	pIC_Primitive	specific
[truncated: 87 more rows]

[truncated: 8 more sheets: GCSF_1.2, GCSF_nocutoff, indo_1.5, indo_1.2, indo_nocutoff, pIC_1.5, pIC_1.2, pIC_nocutoff]
