# Supplementary material for: External signals regulate continuous transcriptional states in hematopoietic stem cells
Source: eLife. 2021 Dec 23;10:e66512. doi: 10.7554/eLife.66512 (PMC8700284; doi:10.7554/eLife.66512)
Supplement: Supplementary file 11. — ChromVar motif activity score enrichment for HSC and LSK scATAC clusters. [file elife-66512-supp11.xlsx]

## Sheet: README
Note: for IRF8 and IRF9 fold change values (avg_logFC) do not make sense - they should be negative since the motifs are more enriched in cluster 1 (pct.2)
this issue has been reported before and advice was to ignore avg_logFC values
https://github.com/timoast/signac/issues/163
log2FC was recalculated (last column) from pct.1 and pct.2

## Sheet: LSK_chromVAR
	gene	p_val	avg_logFC	pct.1	pct.2	p_val_adj	cluster	gene_name	recalculated log2FC
1	MA0003.3	0.00038991	0.102929	0.533	0.491	0.176239	3	TFAP2A	0.118413
2	MA0003.3	0.00106199	-0.086344	0.48	0.505	0.480021	0	TFAP2A	-0.073249
3	MA0003.3	0.000205923	0.165316	0.529	0.491	0.0930772	1	TFAP2A	0.107545
4	MA0003.3	0.00412467	-0.0553102	0.419	0.501	1	5	TFAP2A	-0.25786
5	MA0009.2	3.99921e-08	-0.492065	0.332	0.48	1.80764e-05	7	T	-0.531851
6	MA0009.2	0.00992562	-0.120446	0.403	0.48	1	6	T	-0.252255
7	MA0009.2	7.13447e-05	-0.174237	0.438	0.483	0.0322478	4	T	-0.141092
8	MA0009.2	1.47387e-06	0.127289	0.509	0.463	0.000666188	0	T	0.136653
9	MA0014.3	0.0031068	-0.0802116	0.451	0.488	1	2	PAX5	-0.113754
10	MA0014.3	1.36707e-11	0.330716	0.622	0.476	6.17916e-09	5	PAX5	0.385953
11	MA0014.3	8.73088e-07	0.15934	0.528	0.473	0.000394636	1	PAX5	0.158698
12	MA0014.3	0.00171359	-0.244996	0.368	0.484	0.774541	7	PAX5	-0.395301
13	MA0014.3	0.000473938	-0.103562	0.446	0.487	0.21422	4	PAX5	-0.126878
14	MA0017.2	7.53682e-22	0.829512	0.667	0.47	3.40664e-19	5	NR2F1	0.505026
15	MA0017.2	1.3296e-05	-0.192283	0.448	0.492	0.00600979	0	NR2F1	-0.13516
16	MA0017.2	5.48838e-10	-0.620713	0.29	0.482	2.48075e-07	7	NR2F1	-0.73298
17	MA0017.2	7.3762e-26	-0.452417	0.351	0.497	3.33404e-23	4	NR2F1	-0.501775
18	MA0017.2	2.75938e-40	0.466425	0.615	0.452	1.24724e-37	1	NR2F1	0.444264
19	MA0018.3	6.43282e-28	0.338003	0.608	0.463	2.90763e-25	3	CREB1	0.393059
20	MA0018.3	6.51923e-08	-0.262659	0.415	0.493	2.94669e-05	4	CREB1	-0.248476
21	MA0018.3	1.18544e-05	0.0419838	0.453	0.489	0.0053582	1	CREB1	-0.110323
22	MA0018.3	7.10949e-06	0.319697	0.578	0.479	0.00321349	5	CREB1	0.271044
23	MA0018.3	0.000123842	-0.355441	0.406	0.486	0.0559766	6	CREB1	-0.259477
24	MA0024.3	4.00514e-20	0.568231	0.669	0.473	1.81032e-17	5	E2F1	0.500166
25	MA0024.3	8.66935e-20	-0.316787	0.384	0.498	3.91855e-17	3	E2F1	-0.375039
26	MA0024.3	0.0023646	0.0780602	0.525	0.474	1	2	E2F1	0.14743
27	MA0025.1	7.76137e-16	-0.346164	0.412	0.504	3.50814e-13	2	NFIL3	-0.290779
28	MA0025.1	3.60089e-31	0.40964	0.604	0.468	1.6276e-28	1	NFIL3	0.36804
29	MA0027.2	0.000221488	0.144426	0.524	0.486	0.100113	1	EN1	0.10861
30	MA0027.2	0.000111918	-0.0665049	0.452	0.5	0.0505867	2	EN1	-0.145605
31	MA0027.2	9.83511e-07	-0.215837	0.452	0.499	0.000444547	3	EN1	-0.142717
32	MA0027.2	3.38509e-05	-0.115029	0.459	0.507	0.0153006	0	EN1	-0.143492
33	MA0027.2	5.24453e-12	0.587707	0.699	0.488	2.37053e-09	7	EN1	0.518411
34	MA0027.2	4.47477e-11	0.181347	0.567	0.481	2.02259e-08	4	EN1	0.237312
35	MA0028.2	4.65961e-07	0.206501	0.5	0.445	0.000210615	1	ELK1	0.168123
36	MA0028.2	3.19697e-34	0.125313	0.589	0.429	1.44503e-31	2	ELK1	0.45729
37	MA0028.2	8.79247e-38	-0.797741	0.297	0.477	3.9742e-35	4	ELK1	-0.683526
38	MA0028.2	4.95677e-07	0.179726	0.563	0.449	0.000224046	6	ELK1	0.326419
39	MA0028.2	9.32854e-64	1.88755	0.776	0.439	4.2165e-61	5	ELK1	0.821836
40	MA0028.2	2.76201e-09	-0.585804	0.399	0.463	1.24843e-06	3	ELK1	-0.214623
41	MA0028.2	1.53901e-10	-0.548141	0.41	0.473	6.95633e-08	0	ELK1	-0.206216
42	MA0028.2	1.09618e-20	-0.950402	0.197	0.459	4.95474e-18	7	ELK1	-1.2203
43	MA0030.1	1.38532e-09	-0.198884	0.474	0.525	6.26165e-07	0	FOXF2	-0.14743
44	MA0030.1	1.79547e-07	0.216467	0.625	0.504	8.11554e-05	6	FOXF2	0.310432
45	MA0030.1	4.17658e-06	-0.194347	0.452	0.519	0.00188782	2	FOXF2	-0.199412
46	MA0030.1	6.99851e-23	0.405036	0.619	0.493	3.16333e-20	4	FOXF2	0.328352
47	MA0030.1	5.5262e-31	0.865577	0.839	0.502	2.49784e-28	7	FOXF2	0.740983
48	MA0030.1	6.36348e-10	-0.383378	0.409	0.513	2.87629e-07	5	FOXF2	-0.326858
49	MA0031.1	2.9411e-08	-0.246374	0.48	0.526	1.32938e-05	0	FOXD1	-0.132028
50	MA0031.1	1.01279e-42	0.486683	0.655	0.49	4.57781e-40	4	FOXD1	0.418713
51	MA0031.1	0.00601494	-0.110067	0.477	0.518	1	1	FOXD1	-0.118963
52	MA0031.1	8.1299e-12	-0.375207	0.445	0.524	3.67471e-09	2	FOXD1	-0.235761
53	MA0031.1	1.0062e-42	1.29455	0.86	0.504	4.54803e-40	7	FOXD1	0.770913
54	MA0031.1	1.82699e-12	-0.484398	0.38	0.517	8.25799e-10	5	FOXD1	-0.444165
55	MA0032.2	3.77378e-18	0.72569	0.756	0.491	1.70575e-15	7	FOXC1	0.622663
56	MA0032.2	6.57184e-08	0.187026	0.545	0.49	2.97047e-05	4	FOXC1	0.153474
57	MA0032.2	0.000264312	0.246479	0.557	0.494	0.119469	6	FOXC1	0.173166
58	MA0032.2	1.38889e-06	-0.207442	0.455	0.505	0.00062778	1	FOXC1	-0.150417
59	MA0032.2	8.26594e-08	-0.232341	0.456	0.503	3.7362e-05	3	FOXC1	-0.141525
60	MA0032.2	0.00163177	0.348543	0.539	0.495	0.737561	5	FOXC1	0.122857
61	MA0033.2	0.000218358	0.0570452	0.555	0.507	0.0986977	3	FOXL1	0.130502
62	MA0033.2	9.8034e-55	0.487537	0.686	0.488	4.43114e-52	4	FOXL1	0.491327
63	MA0033.2	6.16139e-51	1.70116	0.891	0.505	2.78495e-48	7	FOXL1	0.819142
64	MA0033.2	5.54308e-11	-0.321393	0.477	0.53	2.50547e-08	0	FOXL1	-0.152003
65	MA0033.2	1.89003e-22	-0.481461	0.42	0.531	8.54296e-20	2	FOXL1	-0.338323
66	MA0033.2	6.49328e-17	-0.588942	0.341	0.521	2.93496e-14	5	FOXL1	-0.611512
67	MA0036.3	1.63164e-97	-6.3491	0.362	0.591	7.37501e-95	0	GATA2	-0.707168
68	MA0036.3	1.9161e-168	6.41704	0.983	0.5	8.66079e-166	6	GATA2	0.975263
69	MA0036.3	3.73107e-113	-4.78933	0.842	0.472	1.68644e-110	4	GATA2	0.835033
70	MA0036.3	3.84557e-54	-1.92579	0.224	0.533	1.7382e-51	5	GATA2	-1.25064
71	MA0036.3	1.00606e-21	-1.99498	0.607	0.503	4.54741e-19	1	GATA2	0.271138
72	MA0036.3	1.14011e-51	-5.80302	0.394	0.543	5.15328e-49	2	GATA2	-0.462757
73	MA0036.3	1.85604e-49	-2.17943	0.943	0.51	8.38931e-47	7	GATA2	0.886761
74	MA0037.3	2.00592e-94	-4.90028	0.365	0.587	9.06675e-92	0	GATA3	-0.685464
75	MA0037.3	1.39524e-44	-1.71651	0.255	0.53	6.30649e-42	5	GATA3	-1.0555
76	MA0037.3	3.27417e-97	-3.59801	0.807	0.475	1.47993e-94	4	GATA3	0.764641
77	MA0037.3	7.36825e-46	-4.45327	0.386	0.542	3.33045e-43	2	GATA3	-0.489692
78	MA0037.3	2.15502e-41	-0.698956	0.902	0.51	9.74067e-39	7	GATA3	0.82263
79	MA0037.3	2.9585e-25	-0.785238	0.623	0.498	1.33724e-22	1	GATA3	0.323086
80	MA0037.3	2.19444e-164	5.25303	0.992	0.498	9.91886e-162	6	GATA3	0.994194
81	MA0039.3	3.18948e-09	0.711195	0.599	0.478	1.44164e-06	5	KLF4	0.325545
82	MA0039.3	8.69738e-10	0.232979	0.543	0.472	3.93121e-07	2	KLF4	0.202165
83	MA0039.3	1.96877e-26	-0.450955	0.369	0.5	8.89886e-24	4	KLF4	-0.438307
84	MA0039.3	1.75378e-05	0.0619339	0.525	0.476	0.00792708	3	KLF4	0.141356
85	MA0039.3	5.21253e-28	-0.863564	0.192	0.49	2.35607e-25	7	KLF4	-1.35168
86	MA0039.3	0.000378964	0.145626	0.555	0.48	0.171292	6	KLF4	0.209453
87	MA0042.2	6.49328e-17	-0.588942	0.341	0.521	2.93496e-14	5	FOXI1	-0.611512
88	MA0042.2	0.000218358	0.0570452	0.555	0.507	0.0986977	3	FOXI1	0.130502
89	MA0042.2	9.8034e-55	0.487537	0.686	0.488	4.43114e-52	4	FOXI1	0.491327
90	MA0042.2	1.89003e-22	-0.481461	0.42	0.531	8.54296e-20	2	FOXI1	-0.338323
91	MA0042.2	6.16139e-51	1.70116	0.891	0.505	2.78495e-48	7	FOXI1	0.819142
92	MA0042.2	5.54308e-11	-0.321393	0.477	0.53	2.50547e-08	0	FOXI1	-0.152003
93	MA0043.2	0.00883956	-0.48354	0.435	0.476	1	3	HLF	-0.129946
94	MA0043.2	2.27538e-11	-0.701974	0.39	0.482	1.02847e-08	4	HLF	-0.305559
95	MA0043.2	1.6313e-07	-0.345258	0.422	0.479	7.37346e-05	2	HLF	-0.182783
96	MA0043.2	6.25091e-14	1.95941	0.617	0.464	2.82541e-11	5	HLF	0.411146
97	MA0043.2	1.89075e-06	-0.740744	0.353	0.475	0.00085462	6	HLF	-0.428259
98	MA0043.2	3.02094e-41	0.38738	0.605	0.444	1.36547e-38	1	HLF	0.446375
99	MA0046.2	7.57706e-09	0.191797	0.565	0.484	3.42483e-06	4	HNF1A	0.223244
100	MA0046.2	0.000963557	-0.162843	0.461	0.5	0.435528	3	HNF1A	-0.117161
101	MA0046.2	0.00027738	-0.0682492	0.453	0.502	0.125376	1	HNF1A	-0.148176
102	MA0046.2	2.55447e-06	-0.164426	0.466	0.507	0.00115462	0	HNF1A	-0.121656
103	MA0046.2	5.97454e-07	0.322058	0.602	0.49	0.000270049	6	HNF1A	0.296982
104	MA0046.2	3.94951e-11	0.521314	0.699	0.49	1.78518e-08	7	HNF1A	0.512511
105	MA0048.2	1.82254e-18	-0.667922	0.371	0.488	8.23786e-16	4	NHLH1	-0.395462
106	MA0048.2	3.03406e-21	0.465473	0.56	0.457	1.37139e-18	2	NHLH1	0.293233
107	MA0048.2	2.38045e-15	-0.0504273	0.346	0.479	1.07596e-12	5	NHLH1	-0.469254
108	MA0048.2	4.07053e-21	-0.663458	0.266	0.482	1.83988e-18	6	NHLH1	-0.857607
109	MA0048.2	1.50297e-18	0.386647	0.571	0.458	6.79341e-16	3	NHLH1	0.318143
110	MA0048.2	1.55627e-15	-0.93192	0.238	0.478	7.03433e-13	7	NHLH1	-1.00605
111	MA0050.2	0.00149816	-4.32709	0.295	0.383	0.677168	7	IRF1	-0.376629
112	MA0050.2	0.00177937	-3.92428	0.387	0.378	0.804274	0	IRF1	0.0339473
113	MA0050.2	4.83543e-84	6.4709	0.766	0.364	2.18561e-81	5	IRF1	1.07341
114	MA0050.2	1.77789e-33	-2.59648	0.51	0.356	8.03607e-31	1	IRF1	0.51862
115	MA0050.2	3.69777e-23	-4.97092	0.246	0.401	1.67139e-20	4	IRF1	-0.704944
116	MA0050.2	1.35708e-54	-5.23945	0.081	0.394	6.134e-52	6	IRF1	-2.2822
117	MA0050.2	4.19668e-19	-3.19854	0.478	0.363	1.8969e-16	2	IRF1	0.397041
118	MA0050.2	8.16299e-73	-4.74799	0.213	0.408	3.68967e-70	3	IRF1	-0.937716
119	MA0051.1	0.000504968	-0.652762	0.506	0.45	0.228246	4	IRF2	0.169212
120	MA0051.1	1.55443e-34	2.7021	0.688	0.447	7.02604e-32	5	IRF2	0.622134
121	MA0051.1	5.40369e-26	-0.095313	0.569	0.435	2.44247e-23	1	IRF2	0.387413
122	MA0051.1	1.80364e-24	-1.45362	0.277	0.464	8.15245e-22	6	IRF2	-0.744239
123	MA0051.1	1.32254e-27	1.40359	0.756	0.45	5.97788e-25	7	IRF2	0.748461
124	MA0051.1	0.00974773	-0.856946	0.424	0.472	1	0	IRF2	-0.154723
125	MA0051.1	1.32184e-61	-1.2961	0.297	0.483	5.9747e-59	3	IRF2	-0.70156
126	MA0052.3	6.15418e-06	0.0578934	0.611	0.452	0.00278169	7	MEF2A	0.43485
127	MA0052.3	1.07161e-45	0.667029	0.601	0.428	4.84369e-43	1	MEF2A	0.489754
128	MA0052.3	5.90435e-08	-0.503503	0.325	0.461	2.66876e-05	6	MEF2A	-0.504327
129	MA0052.3	8.71407e-13	-0.357378	0.404	0.479	3.93876e-10	0	MEF2A	-0.24567
130	MA0052.3	0.00999898	-0.219591	0.431	0.46	1	3	MEF2A	-0.093946
131	MA0052.3	0.000188216	-0.296766	0.416	0.462	0.0850738	4	MEF2A	-0.151309
132	MA0056.1	4.16429e-12	-0.21406	0.414	0.507	1.88226e-09	4	MZF1	-0.292355
133	MA0056.1	2.28335e-17	-0.640758	0.249	0.5	1.03207e-14	7	MZF1	-1.00578
134	MA0056.1	2.8195e-17	0.217694	0.59	0.48	1.27441e-14	3	MZF1	0.297681
135	MA0056.1	6.66966e-23	0.275276	0.588	0.477	3.01469e-20	1	MZF1	0.301827
136	MA0056.1	0.00601351	-0.158251	0.445	0.497	1	6	MZF1	-0.159441
137	MA0056.1	0.00346383	-0.114023	0.473	0.505	1	0	MZF1	-0.0944432
138	MA0057.1	0.00146643	0.187477	0.549	0.486	0.662828	5	MZF1(var.2)	0.17585
139	MA0057.1	2.6931e-13	-0.473192	0.345	0.494	1.21728e-10	6	MZF1(var.2)	-0.517915
140	MA0057.1	2.17602e-07	-0.200065	0.424	0.498	9.83563e-05	4	MZF1(var.2)	-0.232081
141	MA0057.1	4.84825e-06	-0.163684	0.442	0.496	0.00219141	3	MZF1(var.2)	-0.166294
142	MA0057.1	3.51803e-23	0.308781	0.586	0.47	1.59015e-20	1	MZF1(var.2)	0.31824
143	MA0057.1	0.00416585	-0.0875306	0.446	0.489	1	7	MZF1(var.2)	-0.132791
144	MA0058.3	8.3095e-05	-0.283395	0.389	0.475	0.037559	7	MAX	-0.288157
145	MA0058.3	6.22589e-06	-0.251485	0.417	0.482	0.0028141	3	MAX	-0.208986
146	MA0058.3	0.000782848	0.112338	0.52	0.464	0.353847	1	MAX	0.164387
147	MA0058.3	9.6214e-26	0.697769	0.682	0.463	4.34887e-23	5	MAX	0.55876
148	MA0058.3	3.49985e-09	-0.256417	0.395	0.484	1.58193e-06	4	MAX	-0.293154
149	MA0059.1	4.55394e-07	0.212144	0.528	0.462	0.000205838	2	MAX::MYC	0.192645
150	MA0059.1	4.06972e-12	-0.355786	0.397	0.483	1.83951e-09	4	MAX::MYC	-0.282884
151	MA0059.1	8.37034e-06	0.0487639	0.498	0.46	0.0037834	0	MAX::MYC	0.114512
152	MA0059.1	2.09321e-30	0.80815	0.706	0.461	9.46131e-28	5	MAX::MYC	0.614901
153	MA0059.1	1.20894e-16	-0.683678	0.238	0.477	5.46439e-14	7	MAX::MYC	-1.00303
154	MA0059.1	5.85302e-06	-0.227686	0.431	0.48	0.00264556	1	MAX::MYC	-0.155347
155	MA0060.3	6.86259e-10	0.0959319	0.563	0.478	3.10189e-07	4	NFYA	0.236124
156	MA0060.3	2.3821e-09	0.63511	0.599	0.484	1.07671e-06	6	NFYA	0.307549
157	MA0060.3	2.58225e-70	-0.836575	0.307	0.518	1.16718e-67	3	NFYA	-0.754713
158	MA0060.3	9.13639e-21	0.200425	0.588	0.47	4.12965e-18	1	NFYA	0.323155
159	MA0060.3	6.90579e-32	0.972398	0.819	0.482	3.12142e-29	7	NFYA	0.76483
160	MA0060.3	2.27868e-13	-0.409665	0.441	0.511	1.02996e-10	0	NFYA	-0.212545
161	MA0060.3	0.000983262	0.850548	0.536	0.487	0.444434	5	NFYA	0.138311
162	MA0066.1	0.00164267	0.0727033	0.522	0.482	0.742488	1	PPARG	0.115017
163	MA0066.1	0.00900365	-0.0552968	0.451	0.494	1	4	PPARG	-0.131384
164	MA0066.1	2.78664e-09	0.136447	0.561	0.477	1.25956e-06	3	PPARG	0.234012
165	MA0066.1	5.55798e-06	-0.138833	0.389	0.493	0.00251221	6	PPARG	-0.341817
166	MA0068.2	2.67993e-10	0.583632	0.694	0.49	1.21133e-07	7	PAX4	0.502154
167	MA0068.2	0.000889655	-0.0508653	0.458	0.502	0.402124	2	PAX4	-0.13234
168	MA0068.2	4.24935e-06	0.215759	0.539	0.488	0.00192071	4	PAX4	0.143404
169	MA0069.1	0.00340691	0.057528	0.534	0.49	1	1	Pax6	0.124058
170	MA0070.1	4.8713e-07	-0.157635	0.418	0.491	0.000220183	4	PBX1	-0.23222
171	MA0070.1	2.05697e-11	0.15229	0.558	0.467	9.29749e-09	1	PBX1	0.256843
172	MA0070.1	2.22676e-05	-0.125398	0.44	0.489	0.0100649	3	PBX1	-0.152331
173	MA0071.1	8.9603e-07	0.314007	0.596	0.487	0.000405006	5	RORA	0.291391
174	MA0071.1	0.000357921	-0.14184	0.453	0.499	0.16178	2	RORA	-0.139529
175	MA0071.1	0.00377211	-0.0203475	0.461	0.497	1	4	RORA	-0.108479
176	MA0071.1	7.93066e-12	0.186627	0.564	0.478	3.58466e-09	1	RORA	0.238685
177	MA0071.1	0.000537406	-0.197267	0.384	0.497	0.242907	6	RORA	-0.37214
178	MA0071.1	0.000283684	0.0805306	0.523	0.487	0.128225	3	RORA	0.102889
179	MA0071.1	7.30106e-05	-0.101128	0.471	0.502	0.0330008	0	RORA	-0.0919603
180	MA0072.1	7.78571e-05	-0.181476	0.469	0.509	0.0351914	2	RORA(var.2)	-0.118078
181	MA0072.1	1.26426e-08	-0.130228	0.457	0.523	5.71446e-06	0	RORA(var.2)	-0.194617
182	MA0072.1	0.000134834	0.0744819	0.547	0.495	0.0609449	3	RORA(var.2)	0.144112
183	MA0072.1	0.00441844	0.0656344	0.531	0.498	1	4	RORA(var.2)	0.0925661
184	MA0072.1	0.00669703	0.0664776	0.536	0.496	1	1	RORA(var.2)	0.111893
185	MA0072.1	5.34854e-07	0.441488	0.648	0.499	0.000241754	7	RORA(var.2)	0.376954
186	MA0073.1	3.6293e-40	-0.552347	0.327	0.494	1.64044e-37	4	RREB1	-0.59522
187	MA0073.1	2.88362e-18	-0.66482	0.212	0.478	1.3034e-15	7	RREB1	-1.17295
188	MA0073.1	1.7946e-21	-0.563024	0.261	0.482	8.11157e-19	6	RREB1	-0.884983
189	MA0073.1	2.46258e-07	0.219216	0.514	0.465	0.000111309	1	RREB1	0.144538
190	MA0073.1	1.327e-13	0.105361	0.518	0.452	5.99803e-11	0	RREB1	0.196629
191	MA0073.1	0.000121494	0.0666461	0.519	0.464	0.0549151	2	RREB1	0.16161
192	MA0073.1	1.12466e-07	0.368308	0.576	0.468	5.08345e-05	5	RREB1	0.29956
193	MA0074.1	0.0040753	-0.154946	0.471	0.495	1	2	RXRA::VDR	-0.0717015
194	MA0074.1	0.000758383	0.0685007	0.581	0.488	0.342789	5	RXRA::VDR	0.251657
195	MA0074.1	5.25384e-05	0.305818	0.585	0.49	0.0237474	7	RXRA::VDR	0.255655
196	MA0076.2	6.42568e-41	1.41465	0.724	0.46	2.90441e-38	5	ELK4	0.654356
197	MA0076.2	2.25916e-57	-0.837547	0.286	0.499	1.02114e-54	4	ELK4	-0.803025
198	MA0076.2	7.81964e-05	-0.201907	0.518	0.464	0.0353448	3	ELK4	0.158827
199	MA0076.2	1.41057e-43	0.655935	0.614	0.444	6.37576e-41	1	ELK4	0.467679
200	MA0076.2	8.55309e-35	0.147914	0.6	0.448	3.86599e-32	2	ELK4	0.421464
201	MA0076.2	3.63868e-23	-1.04955	0.197	0.478	1.64468e-20	7	ELK4	-1.27881
202	MA0076.2	0.000958833	0.0458789	0.538	0.469	0.433393	6	ELK4	0.198018
203	MA0076.2	7.04474e-59	-0.776644	0.366	0.52	3.18422e-56	0	ELK4	-0.506668
204	MA0077.1	0.00043599	0.262345	0.58	0.492	0.197068	7	SOX9	0.237395
205	MA0077.1	0.00550942	-0.0920584	0.477	0.502	1	0	SOX9	-0.0736981
206	MA0079.3	6.86721e-05	0.0960218	0.496	0.446	0.0310398	2	SP1	0.153296
207	MA0079.3	6.72907e-114	0.588053	0.685	0.409	3.04154e-111	1	SP1	0.744003
208	MA0079.3	1.10326e-94	-0.713895	0.229	0.49	4.98675e-92	3	SP1	-1.09743
209	MA0079.3	1.12928e-12	-0.291926	0.409	0.474	5.10435e-10	0	SP1	-0.212786
210	MA0079.3	0.000228886	0.137041	0.529	0.45	0.103457	6	SP1	0.233343
211	MA0079.3	7.12257e-16	-0.323527	0.354	0.468	3.2194e-13	4	SP1	-0.402759
212	MA0079.3	1.51812e-34	0.714564	0.701	0.442	6.8619e-32	5	SP1	0.665368
213	MA0080.4	2.73244e-113	-11.4309	0	0.477	1.23506e-110	7	SPI1	#NUM!
214	MA0080.4	1.85983e-11	-5.68612	0.534	0.455	8.40645e-09	2	SPI1	0.230973
215	MA0080.4	4.07785e-32	8.52513	0.688	0.457	1.84319e-29	5	SPI1	0.590214
216	MA0080.4	8.16081e-49	-7.82619	0.179	0.479	3.68868e-46	6	SPI1	-1.42007
217	MA0080.4	1.01997e-209	-8.52582	0.099	0.521	4.61026e-207	4	SPI1	-2.39578
218	MA0080.4	5.68559e-05	-6.25775	0.493	0.463	0.0256989	3	SPI1	0.0905755
219	MA0080.4	1.3967e-23	-6.51391	0.534	0.437	6.31309e-21	0	SPI1	0.289206
220	MA0080.4	4.37136e-53	-4.2421	0.618	0.438	1.97586e-50	1	SPI1	0.496676
221	MA0081.1	1.27944e-87	-2.86376	0.021	0.498	5.78305e-85	7	SPIB	-4.56768
222	MA0081.1	2.60168e-110	-1.4522	0.215	0.528	1.17596e-107	4	SPIB	-1.2962
223	MA0081.1	9.94108e-87	0.53337	0.677	0.451	4.49337e-84	1	SPIB	0.586028
224	MA0081.1	1.20105e-07	2.10837	0.615	0.482	5.42874e-05	5	SPIB	0.351553
225	MA0081.1	1.07755e-32	-0.00538538	0.612	0.468	4.87053e-30	3	SPIB	0.387023
226	MA0081.1	1.02285e-43	-1.37683	0.199	0.5	4.62329e-41	6	SPIB	-1.32916
227	MA0083.3	4.20438e-05	-0.131418	0.456	0.497	0.0190038	0	SRF	-0.124212
228	MA0083.3	2.6985e-09	0.238736	0.625	0.478	1.21972e-06	6	SRF	0.386846
229	MA0083.3	0.000209383	0.161268	0.552	0.481	0.0946413	5	SRF	0.198631
230	MA0084.1	9.07943e-05	-0.176154	0.449	0.504	0.041039	3	SRY	-0.166708
231	MA0084.1	7.06745e-15	0.740407	0.72	0.491	3.19449e-12	7	SRY	0.552274
232	MA0084.1	0.00819188	-0.116548	0.473	0.501	1	1	SRY	-0.0829704
233	MA0084.1	8.70175e-14	0.303694	0.59	0.482	3.93319e-11	4	SRY	0.291682
234	MA0088.2	0.000142187	0.294848	0.563	0.482	0.0642686	6	ZNF143	0.224102
235	MA0088.2	3.3131e-17	0.471813	0.682	0.477	1.49752e-14	5	ZNF143	0.515782
236	MA0088.2	7.19606e-18	-0.283064	0.406	0.501	3.25262e-15	1	ZNF143	-0.303331
237	MA0090.2	1.24635e-17	0.851078	0.725	0.494	5.63352e-15	7	TEAD1	0.55347
238	MA0090.2	5.77218e-07	-0.404406	0.424	0.502	0.000260903	5	TEAD1	-0.243623
239	MA0090.2	8.12266e-09	-0.210679	0.458	0.517	3.67144e-06	0	TEAD1	-0.174817
240	MA0090.2	6.25107e-18	0.273611	0.601	0.484	2.82548e-15	4	TEAD1	0.312358
241	MA0091.1	1.44197e-34	-1.33056	0.119	0.465	6.51772e-32	7	TAL1::TCF3	-1.96627
242	MA0091.1	4.6008e-15	-0.55872	0.269	0.466	2.07956e-12	6	TAL1::TCF3	-0.792724
243	MA0091.1	2.08232e-69	0.712378	0.634	0.426	9.41211e-67	2	TAL1::TCF3	0.573629
244	MA0091.1	8.11866e-43	-0.68897	0.301	0.481	3.66963e-40	4	TAL1::TCF3	-0.676273
245	MA0093.2	3.22663e-07	-0.596902	0.332	0.471	0.000145844	7	USF1	-0.504544
246	MA0093.2	0.000160429	-0.359083	0.401	0.471	0.0725141	6	USF1	-0.232125
247	MA0093.2	0.000206965	-0.310978	0.429	0.475	0.0935483	3	USF1	-0.14695
248	MA0093.2	4.72706e-06	-0.283333	0.434	0.484	0.00213663	0	USF1	-0.157312
249	MA0093.2	3.947e-36	0.771299	0.732	0.457	1.78404e-33	5	USF1	0.679649
250	MA0093.2	5.21443e-58	0.798686	0.626	0.438	2.35692e-55	1	USF1	0.515232
251	MA0093.2	1.24562e-21	-0.555173	0.352	0.485	5.63022e-19	4	USF1	-0.462409
252	MA0095.2	3.23092e-11	-0.984115	0.275	0.462	1.46038e-08	7	YY1	-0.748461
253	MA0095.2	2.22726e-27	-0.279881	0.532	0.425	1.00672e-24	0	YY1	0.323963
254	MA0095.2	1.85352e-12	-0.0404328	0.521	0.447	8.3779e-10	2	YY1	0.221009
255	MA0095.2	1.43889e-20	-0.873865	0.353	0.474	6.50379e-18	4	YY1	-0.425219
256	MA0095.2	2.63944e-30	-0.899229	0.341	0.477	1.19303e-27	3	YY1	-0.484218
257	MA0095.2	2.1406e-17	-0.664879	0.379	0.474	9.6755e-15	1	YY1	-0.322689
258	MA0095.2	2.79432e-76	2.43617	0.807	0.443	1.26303e-73	5	YY1	0.865262
259	MA0098.3	2.59983e-42	0.762958	0.595	0.442	1.17512e-39	1	ETS1	0.428843
260	MA0098.3	5.16105e-73	-0.866448	0.351	0.519	2.3328e-70	0	ETS1	-0.564264
261	MA0098.3	1.08433e-12	-0.220004	0.541	0.455	4.90119e-10	3	ETS1	0.249762
262	MA0098.3	0.00914734	-0.100802	0.524	0.464	1	6	ETS1	0.175442
263	MA0098.3	1.02275e-34	0.050689	0.593	0.444	4.62284e-32	2	ETS1	0.417472
264	MA0098.3	2.6688e-21	-1.17252	0.228	0.472	1.2063e-18	7	ETS1	-1.04975
265	MA0098.3	7.07165e-29	1.50231	0.685	0.457	3.19639e-26	5	ETS1	0.58391
266	MA0098.3	1.67487e-49	-0.823662	0.303	0.491	7.57043e-47	4	ETS1	-0.696405
267	MA0099.3	1.98306e-85	-7.05201	0.277	0.506	8.96344e-83	2	FOS::JUN	-0.869251
268	MA0099.3	2.9618e-37	-7.52934	0.245	0.48	1.33874e-34	5	FOS::JUN	-0.970253
269	MA0099.3	7.18999e-18	1.3837	0.689	0.465	3.24988e-15	7	FOS::JUN	0.567273
270	MA0099.3	4.13537e-33	-5.66114	0.631	0.446	1.86919e-30	4	FOS::JUN	0.500596
271	MA0099.3	1.15284e-09	-7.36067	0.443	0.475	5.21086e-07	1	FOS::JUN	-0.100621
272	MA0099.3	5.73602e-92	-9.01503	0.317	0.54	2.59268e-89	0	FOS::JUN	-0.768477
273	MA0099.3	0	4.24596	0.936	0.395	0	3	FOS::JUN	1.24466
274	MA0100.3	0.00106881	0.309874	0.547	0.48	0.483103	5	MYB	0.188506
275	MA0100.3	4.29373e-17	-0.303164	0.392	0.496	1.94077e-14	4	MYB	-0.339486
276	MA0100.3	2.85996e-27	-0.924808	0.181	0.49	1.2927e-24	7	MYB	-1.43679
277	MA0100.3	2.42205e-32	0.411703	0.601	0.46	1.09477e-29	1	MYB	0.385731
278	MA0101.1	2.35515e-07	-0.297487	0.51	0.439	0.000106453	3	REL	0.216276
279	MA0101.1	9.32199e-09	0.517374	0.386	0.46	4.21354e-06	2	REL	-0.253033
280	MA0101.1	0.00279242	-0.0285107	0.539	0.447	1	7	REL	0.27001
281	MA0101.1	1.72915e-12	0.835942	0.51	0.437	7.81574e-10	1	REL	0.222864
282	MA0101.1	3.79208e-24	-0.638161	0.387	0.477	1.71402e-21	0	REL	-0.301656
283	MA0101.1	0.00106887	-0.269837	0.527	0.446	0.483131	6	REL	0.240759
284	MA0102.3	6.41285e-81	-5.78935	0.179	0.449	2.89861e-78	4	CEBPA	-1.32676
285	MA0102.3	8.75076e-21	-4.67096	0.224	0.422	3.95534e-18	6	CEBPA	-0.913744
286	MA0102.3	2.65117e-62	6.10537	0.74	0.4	1.19833e-59	5	CEBPA	0.887525
287	MA0102.3	3.30861e-18	-1.72066	0.5	0.398	1.49549e-15	1	CEBPA	0.32916
288	MA0102.3	3.28314e-32	-6.13191	0.124	0.42	1.48398e-29	7	CEBPA	-1.76005
289	MA0102.3	8.61422e-08	-4.46236	0.451	0.397	3.89363e-05	0	CEBPA	0.183988
290	MA0103.3	1.36284e-16	0.508436	0.538	0.437	6.16003e-14	1	ZEB1	0.299973
291	MA0103.3	2.44887e-08	-0.129925	0.491	0.436	1.10689e-05	0	ZEB1	0.171395
292	MA0103.3	2.23915e-25	-1.33464	0.166	0.459	1.0121e-22	7	ZEB1	-1.46731
293	MA0103.3	2.93312e-09	0.2853	0.506	0.443	1.32577e-06	2	ZEB1	0.191831
294	MA0103.3	1.8838e-18	-0.906145	0.346	0.469	8.5148e-16	4	ZEB1	-0.438816
295	MA0103.3	9.059e-37	-0.811529	0.188	0.464	4.09467e-34	6	ZEB1	-1.30339
296	MA0104.4	1.0998e-22	0.536922	0.69	0.466	4.97109e-20	5	MYCN	0.566266
297	MA0104.4	0.00639866	-0.083595	0.443	0.481	1	3	MYCN	-0.11873
298	MA0104.4	0.000945393	-0.261465	0.383	0.478	0.427318	7	MYCN	-0.319666
299	MA0104.4	0.000189334	-0.112772	0.423	0.483	0.0855788	4	MYCN	-0.191366
300	MA0105.4	2.30863e-08	-0.718259	0.403	0.47	1.0435e-05	4	NFKB1	-0.221881
301	MA0105.4	9.77577e-15	0.164221	0.545	0.446	4.41865e-12	1	NFKB1	0.289213
302	MA0105.4	2.24965e-05	-0.145177	0.415	0.47	0.0101684	2	NFKB1	-0.179549
303	MA0105.4	6.49157e-23	0.708571	0.554	0.447	2.93419e-20	3	NFKB1	0.309611
304	MA0105.4	4.37328e-08	-0.670494	0.301	0.465	1.97672e-05	7	NFKB1	-0.627467
305	MA0105.4	1.16172e-05	-0.347228	0.438	0.473	0.00525097	0	NFKB1	-0.110909
306	MA0106.3	0.00268145	-0.179713	0.451	0.497	1	5	TP53	-0.140118
307	MA0106.3	0.00256023	0.0781466	0.518	0.49	1	1	TP53	0.0801703
308	MA0107.1	1.4269e-19	0.31825	0.529	0.428	6.4496e-17	1	RELA	0.305657
309	MA0107.1	0.00657107	0.812756	0.487	0.442	1	5	RELA	0.139875
310	MA0107.1	9.39679e-09	-0.612758	0.386	0.455	4.24735e-06	2	RELA	-0.237266
311	MA0107.1	1.17132e-21	-0.0484506	0.38	0.473	5.29439e-19	0	RELA	-0.315841
312	MA0107.1	4.2443e-09	0.573853	0.509	0.434	1.91842e-06	3	RELA	0.229971
313	MA0112.3	2.86592e-08	-0.189469	0.416	0.494	1.2954e-05	4	ESR1	-0.247928
314	MA0112.3	1.25422e-09	-0.417562	0.301	0.488	5.66907e-07	7	ESR1	-0.697118
315	MA0112.3	0.00160456	-0.139517	0.459	0.488	0.725262	2	ESR1	-0.088387
316	MA0112.3	0.000105934	0.212267	0.552	0.48	0.047882	5	ESR1	0.201634
317	MA0112.3	4.67171e-07	0.145661	0.547	0.473	0.000211161	3	ESR1	0.209701
318	MA0112.3	0.000168446	-0.282886	0.392	0.487	0.0761378	6	ESR1	-0.313068
319	MA0112.3	3.89796e-08	0.201062	0.534	0.474	1.76188e-05	1	ESR1	0.171953
320	MA0113.3	0.00576603	0.15333	0.611	0.497	1	7	NR3C1	0.297927
321	MA0113.3	0.00020702	-0.115957	0.479	0.509	0.0935729	0	NR3C1	-0.08764
322	MA0115.1	2.37895e-07	-0.467687	0.332	0.486	0.000107529	7	NR1H2::RXRA	-0.549773
323	MA0115.1	1.70402e-10	-0.198252	0.423	0.492	7.70219e-08	4	NR1H2::RXRA	-0.218001
324	MA0115.1	5.47735e-18	0.218905	0.576	0.465	2.47576e-15	1	NR1H2::RXRA	0.308838
325	MA0115.1	6.42932e-09	0.341184	0.591	0.478	2.90605e-06	5	NR1H2::RXRA	0.306148
326	MA0119.1	0.000126826	0.304173	0.611	0.503	0.0573253	7	NFIC::TLX1	0.280614
327	MA0119.1	1.86757e-105	1.02291	0.711	0.466	8.44141e-103	1	NFIC::TLX1	0.60952
328	MA0119.1	2.44534e-09	-0.347731	0.443	0.517	1.10529e-06	2	NFIC::TLX1	-0.222858
329	MA0119.1	4.53328e-98	-1.58144	0.115	0.523	2.04904e-95	5	NFIC::TLX1	-2.18518
330	MA0119.1	6.12771e-40	-0.636774	0.418	0.545	2.76972e-37	0	NFIC::TLX1	-0.382753
331	MA0119.1	7.20358e-06	-0.106713	0.561	0.497	0.00325602	4	NFIC::TLX1	0.174755
332	MA0119.1	1.86869e-12	0.076517	0.587	0.492	8.44647e-10	3	NFIC::TLX1	0.254702
333	MA0122.2	4.7362e-11	0.188269	0.579	0.49	2.14076e-08	4	NKX3-2	0.240782
334	MA0122.2	2.42197e-09	-0.212431	0.432	0.514	1.09473e-06	2	NKX3-2	-0.250737
335	MA0122.2	4.48417e-13	0.559691	0.72	0.497	2.02684e-10	7	NKX3-2	0.534751
336	MA0122.2	1.05954e-05	-0.281063	0.396	0.506	0.00478913	5	NKX3-2	-0.353637
337	MA0130.1	0.000954085	0.0452208	0.531	0.488	0.431246	2	ZNF354C	0.121831
338	MA0130.1	0.00305987	-0.28104	0.394	0.497	1	7	ZNF354C	-0.33505
339	MA0130.1	1.07412e-18	-0.245243	0.397	0.513	4.85504e-16	1	ZNF354C	-0.36982
340	MA0130.1	0.00441379	0.243226	0.589	0.49	1	5	ZNF354C	0.265486
341	MA0130.1	1.02643e-07	0.142955	0.528	0.479	4.63947e-05	0	ZNF354C	0.140512
342	MA0131.2	0.000501867	0.0832753	0.507	0.473	0.226844	0	HINFP	0.100146
343	MA0131.2	4.27832e-06	-0.172315	0.425	0.493	0.0019338	3	HINFP	-0.214125
344	MA0131.2	0.00731548	-0.209112	0.409	0.485	1	7	HINFP	-0.245884
345	MA0131.2	8.14117e-16	0.480469	0.654	0.476	3.67981e-13	5	HINFP	0.458329
346	MA0131.2	0.00165224	-0.0762154	0.44	0.49	0.74681	4	HINFP	-0.155278
347	MA0132.2	1.51887e-08	0.240621	0.559	0.483	6.86529e-06	4	PDX1	0.210825
348	MA0132.2	1.6533e-13	0.616422	0.71	0.488	7.47292e-11	7	PDX1	0.540938
349	MA0132.2	0.000721657	-0.146739	0.46	0.499	0.326189	2	PDX1	-0.117406
350	MA0132.2	0.000964664	-0.083013	0.47	0.503	0.436028	0	PDX1	-0.0978976
351	MA0132.2	0.007698	-0.0558303	0.454	0.499	1	3	PDX1	-0.136348
352	MA0136.2	3.58786e-22	-0.625703	0.57	0.44	1.62171e-19	2	ELF5	0.373458
353	MA0136.2	5.8786e-11	-1.23409	0.305	0.467	2.65713e-08	6	ELF5	-0.614613
354	MA0136.2	0.00190694	-0.975437	0.501	0.454	0.861936	3	ELF5	0.142118
355	MA0136.2	1.00924e-80	-1.69615	0.241	0.493	4.56175e-78	4	ELF5	-1.03255
356	MA0136.2	2.10907e-42	3.12919	0.706	0.449	9.53301e-40	5	ELF5	0.652953
357	MA0136.2	3.96151e-67	-2.63693	0.062	0.469	1.7906e-64	7	ELF5	-2.91925
358	MA0136.2	6.87916e-23	-1.38068	0.393	0.491	3.10938e-20	0	ELF5	-0.321194
359	MA0136.2	2.11537e-89	0.293605	0.65	0.424	9.56146e-87	1	ELF5	0.616375
360	MA0137.3	3.53979e-15	0.319963	0.574	0.482	1.59998e-12	1	STAT1	0.252018
361	MA0137.3	1.70172e-13	0.200092	0.577	0.485	7.6918e-11	4	STAT1	0.250587
362	MA0137.3	0.000651314	-0.137361	0.463	0.503	0.294394	2	STAT1	-0.119546
363	MA0137.3	4.56005e-20	-0.312726	0.44	0.523	2.06114e-17	0	STAT1	-0.249307
364	MA0137.3	1.20658e-31	1.14927	0.834	0.489	5.45372e-29	7	STAT1	0.770213
365	MA0137.3	2.21844e-05	-0.254931	0.447	0.505	0.0100274	3	STAT1	-0.176009
366	MA0138.2	0.000271841	0.109998	0.537	0.495	0.122872	0	REST	0.117494
367	MA0138.2	3.1034e-08	0.124172	0.576	0.497	1.40274e-05	3	REST	0.212823
368	MA0138.2	5.9806e-13	-0.209454	0.437	0.522	2.70323e-10	1	REST	-0.256417
369	MA0138.2	0.000549338	-0.33092	0.425	0.51	0.248301	7	REST	-0.263034
370	MA0138.2	7.108e-05	-0.124993	0.432	0.512	0.0321281	5	REST	-0.245112
371	MA0139.1	3.59263e-122	-2.57147	0.623	0.413	1.62387e-119	0	CTCF	0.59309
372	MA0139.1	5.40892e-42	-2.89238	0.627	0.451	2.44483e-39	2	CTCF	0.475338
373	MA0139.1	0.00169305	4.73413	0.527	0.477	0.765258	6	CTCF	0.143814
374	MA0139.1	4.85983e-103	-5.01464	0.215	0.521	2.19664e-100	3	CTCF	-1.27695
375	MA0139.1	1.06729e-07	-3.78481	0.536	0.47	4.82413e-05	4	CTCF	0.189572
376	MA0139.1	0	-3.25653	0.151	0.542	0	1	CTCF	-1.84374
377	MA0139.1	1.03413e-48	1.10117	0.747	0.467	4.67425e-46	5	CTCF	0.677686
378	MA0140.2	1.20568e-147	-3.71117	0.865	0.462	5.44968e-145	4	GATA1::TAL1	0.904807
379	MA0140.2	6.28783e-92	-5.91603	0.367	0.581	2.8421e-89	0	GATA1::TAL1	-0.662758
380	MA0140.2	9.29075e-57	-5.15709	0.369	0.541	4.19942e-54	2	GATA1::TAL1	-0.552008
381	MA0140.2	4.44475e-74	-0.347539	0.995	0.503	2.00903e-71	7	GATA1::TAL1	0.984138
382	MA0140.2	7.82218e-171	4.62835	0.978	0.495	3.53562e-168	6	GATA1::TAL1	0.982406
383	MA0140.2	3.77625e-68	-1.63991	0.161	0.53	1.70687e-65	5	GATA1::TAL1	-1.71893
384	MA0140.2	1.45434e-10	-0.0170615	0.579	0.501	6.5736e-08	1	GATA1::TAL1	0.208753
385	MA0141.3	8.82188e-28	0.372971	0.585	0.463	3.98749e-25	1	ESRRB	0.337424
386	MA0141.3	0.00896929	-0.200906	0.431	0.484	1	6	ESRRB	-0.167319
387	MA0141.3	1.47194e-09	-0.233486	0.409	0.493	6.65318e-07	4	ESRRB	-0.269487
388	MA0141.3	0.000869303	-0.394139	0.383	0.484	0.392925	7	ESRRB	-0.337663
389	MA0141.3	2.82478e-06	0.348238	0.596	0.477	0.0012768	5	ESRRB	0.321323
390	MA0141.3	0.00259653	-0.0881412	0.455	0.487	1	2	ESRRB	-0.0980552
391	MA0144.2	4.18986e-05	0.135342	0.531	0.486	0.0189381	1	STAT3	0.127756
392	MA0144.2	1.59649e-07	0.221724	0.533	0.487	7.21615e-05	4	STAT3	0.130214
393	MA0144.2	2.11552e-23	0.733751	0.808	0.486	9.56217e-21	7	STAT3	0.733399
394	MA0144.2	1.47633e-15	-0.298764	0.402	0.508	6.67301e-13	3	STAT3	-0.337633
395	MA0144.2	6.04772e-10	-0.214708	0.459	0.508	2.73357e-07	0	STAT3	-0.146334
396	MA0145.3	0.000163136	-0.0027846	0.447	0.503	0.0737375	2	TFCP2	-0.170284
397	MA0145.3	0.00272992	-0.129361	0.454	0.5	1	3	TFCP2	-0.139236
398	MA0145.3	7.41071e-06	0.167232	0.542	0.487	0.00334964	4	TFCP2	0.154371
399	MA0145.3	9.08392e-10	0.478037	0.699	0.49	4.10593e-07	7	TFCP2	0.512511
400	MA0147.3	0.00227192	-0.135365	0.438	0.483	1	3	MYC	-0.141092
401	MA0147.3	1.00528e-31	0.613324	0.708	0.467	4.54388e-29	5	MYC	0.600327
402	MA0147.3	2.32933e-08	-0.203228	0.41	0.487	1.05286e-05	4	MYC	-0.248298
403	MA0147.3	8.81109e-06	-0.287287	0.373	0.479	0.00398261	7	MYC	-0.36085
404	MA0148.3	1.2453e-08	-0.319307	0.445	0.519	5.62876e-06	2	FOXA1	-0.221929
405	MA0148.3	4.6827e-14	-0.310372	0.469	0.525	2.11658e-11	0	FOXA1	-0.16273
406	MA0148.3	2.2243e-11	-0.479937	0.362	0.514	1.00539e-08	5	FOXA1	-0.505779
407	MA0148.3	1.30507e-58	1.6402	0.912	0.499	5.89891e-56	7	FOXA1	0.869994
408	MA0148.3	1.31847e-43	0.487813	0.665	0.485	5.9595e-41	4	FOXA1	0.45537
409	MA0149.1	1.58343e-75	0.663505	0.673	0.473	7.15711e-73	1	EWSR1-FLI1	0.508766
410	MA0149.1	2.82765e-27	-0.33617	0.432	0.539	1.2781e-24	0	EWSR1-FLI1	-0.319254
411	MA0149.1	1.32992e-17	-0.333919	0.396	0.511	6.01122e-15	5	EWSR1-FLI1	-0.367823
412	MA0152.1	9.71799e-27	-0.445566	0.416	0.523	4.39253e-24	0	NFATC2	-0.330227
413	MA0152.1	2.22096e-21	0.197196	0.617	0.471	1.00387e-18	4	NFATC2	0.389543
414	MA0152.1	4.80476e-06	0.234853	0.583	0.486	0.00217175	6	NFATC2	0.26254
415	MA0152.1	1.60709e-65	-0.728372	0.304	0.52	7.26405e-63	3	NFATC2	-0.77444
416	MA0152.1	5.81033e-42	0.565811	0.626	0.463	2.62627e-39	1	NFATC2	0.43515
417	MA0152.1	1.0049e-38	1.17936	0.829	0.482	4.54216e-36	7	NFATC2	0.782339
418	MA0153.2	2.99074e-24	1.06241	0.767	0.5	1.35182e-21	7	HNF1B	0.617298
419	MA0153.2	1.13908e-24	0.376284	0.614	0.489	5.14864e-22	4	HNF1B	0.328404
420	MA0153.2	1.16277e-05	0.0773922	0.622	0.501	0.00525571	6	HNF1B	0.312104
421	MA0153.2	2.17518e-11	-0.459249	0.357	0.512	9.83182e-09	5	HNF1B	-0.52022
422	MA0153.2	9.25039e-09	-0.204554	0.467	0.523	4.18118e-06	0	HNF1B	-0.163388
423	MA0153.2	7.5979e-08	-0.234157	0.456	0.514	3.43425e-05	2	HNF1B	-0.172735
424	MA0154.3	0.000174664	-0.663108	0.52	0.487	0.0789482	1	EBF1	0.0945899
425	MA0154.3	3.45494e-05	-0.82377	0.466	0.505	0.0156163	0	EBF1	-0.115953
426	MA0155.1	5.31629e-29	0.325259	0.603	0.462	2.40296e-26	1	INSM1	0.384265
427	MA0155.1	0.000271822	-0.12984	0.46	0.496	0.122864	0	INSM1	-0.108706
428	MA0155.1	0.000386429	-0.215317	0.43	0.487	0.174666	5	INSM1	-0.179585
429	MA0156.2	7.04619e-05	-0.0460097	0.543	0.454	0.0318488	6	FEV	0.25826
430	MA0156.2	9.30093e-32	-0.77117	0.379	0.493	4.20402e-29	0	FEV	-0.37939
431	MA0156.2	2.24701e-16	0.81415	0.537	0.442	1.01565e-13	1	FEV	0.280876
432	MA0156.2	8.10492e-30	-1.32629	0.171	0.464	3.66343e-27	7	FEV	-1.44013
433	MA0156.2	5.47973e-56	-0.884938	0.263	0.486	2.47684e-53	4	FEV	-0.885894
434	MA0156.2	2.43937e-57	1.37383	0.784	0.443	1.1026e-54	5	FEV	0.823547
435	MA0156.2	1.98225e-42	0.152416	0.605	0.43	8.95976e-40	2	FEV	0.492598
436	MA0157.2	1.01279e-42	0.486683	0.655	0.49	4.57781e-40	4	FOXO3	0.418713
437	MA0157.2	2.9411e-08	-0.246374	0.48	0.526	1.32938e-05	0	FOXO3	-0.132028
438	MA0157.2	1.82699e-12	-0.484398	0.38	0.517	8.25799e-10	5	FOXO3	-0.444165
439	MA0157.2	1.0062e-42	1.29455	0.86	0.504	4.54803e-40	7	FOXO3	0.770913
440	MA0157.2	0.00601494	-0.110067	0.477	0.518	1	1	FOXO3	-0.118963
441	MA0157.2	8.1299e-12	-0.375207	0.445	0.524	3.67471e-09	2	FOXO3	-0.235761
442	MA0158.1	4.1625e-12	0.206392	0.577	0.482	1.88145e-09	4	HOXA5	0.259538
443	MA0158.1	3.05166e-12	0.677066	0.705	0.489	1.37935e-09	7	HOXA5	0.527789
444	MA0158.1	0.00511714	0.0805115	0.532	0.492	1	6	HOXA5	0.112768
445	MA0158.1	8.7537e-07	-0.18979	0.446	0.502	0.000395667	3	HOXA5	-0.170644
446	MA0159.1	1.31974e-08	0.159525	0.56	0.493	5.9652e-06	3	RARA::RXRA	0.183839
447	MA0159.1	1.73045e-09	-0.149342	0.435	0.514	7.82165e-07	2	RARA::RXRA	-0.240753
448	MA0159.1	1.74908e-08	-0.146624	0.467	0.518	7.90586e-06	0	RARA::RXRA	-0.14953
449	MA0159.1	6.84532e-22	0.263871	0.605	0.482	3.09408e-19	1	RARA::RXRA	0.327902
450	MA0160.1	4.48287e-25	0.400584	0.586	0.464	2.02626e-22	1	NR4A2	0.336776
451	MA0160.1	0.00124591	0.364742	0.544	0.481	0.563153	5	NR4A2	0.17757
452	MA0160.1	9.85551e-07	-0.22601	0.425	0.493	0.000445469	4	NR4A2	-0.214125
453	MA0160.1	2.19324e-06	-0.220217	0.461	0.494	0.000991344	0	NR4A2	-0.0997443
454	MA0160.1	0.000273945	-0.305409	0.406	0.487	0.123823	6	NR4A2	-0.262442
455	MA0161.2	3.10817e-20	0.360577	0.614	0.508	1.40489e-17	1	NFIC	0.27341
456	MA0161.2	9.75452e-42	0.35416	0.67	0.504	4.40904e-39	4	NFIC	0.410737
457	MA0161.2	2.5402e-76	-1.30791	0.174	0.541	1.14817e-73	5	NFIC	-1.63654
458	MA0161.2	1.33951e-22	-0.383167	0.428	0.543	6.05457e-20	2	NFIC	-0.343341
459	MA0161.2	6.92659e-18	0.933147	0.767	0.52	3.13082e-15	7	NFIC	0.560715
460	MA0161.2	1.37309e-12	-0.380459	0.482	0.545	6.20635e-10	0	NFIC	-0.177223
461	MA0161.2	1.40845e-07	0.177453	0.585	0.516	6.3662e-05	3	NFIC	0.181066
462	MA0162.3	5.84883e-36	0.78454	0.719	0.461	2.64367e-33	5	EGR1	0.641225
463	MA0162.3	4.59944e-06	-0.216224	0.425	0.478	0.00207895	4	EGR1	-0.169548
464	MA0162.3	4.60765e-06	0.128261	0.513	0.464	0.00208266	1	EGR1	0.144834
465	MA0162.3	0.00119697	-0.108432	0.453	0.475	0.541031	2	EGR1	-0.0684165
466	MA0162.3	8.86721e-11	-0.272825	0.394	0.484	4.00798e-08	3	EGR1	-0.296811
467	MA0163.1	2.39586e-07	-0.149216	0.425	0.497	0.000108293	3	PLAG1	-0.225783
468	MA0163.1	0.0062101	-0.143741	0.429	0.489	1	6	PLAG1	-0.188857
469	MA0163.1	0.001215	0.206167	0.601	0.484	0.549181	7	PLAG1	0.312358
470	MA0163.1	0.00576612	-0.0816662	0.456	0.491	1	4	PLAG1	-0.106689
471	MA0163.1	9.07425e-31	0.338692	0.603	0.464	4.10156e-28	1	PLAG1	0.378033
472	MA0258.2	0.00585985	-0.178383	0.412	0.492	1	6	ESR2	-0.256014
473	MA0258.2	1.06427e-26	0.342806	0.6	0.467	4.81052e-24	1	ESR2	0.36154
474	MA0258.2	5.29217e-22	0.356293	0.6	0.471	2.39206e-19	3	ESR2	0.349235
475	MA0258.2	1.32263e-06	-0.211041	0.425	0.498	0.000597827	4	ESR2	-0.228683
476	MA0258.2	1.07091e-05	-0.162481	0.455	0.504	0.0048405	0	ESR2	-0.147557
477	MA0258.2	0.00475214	-0.300094	0.404	0.49	1	7	ESR2	-0.278426
478	MA0258.2	1.06733e-12	-0.271043	0.427	0.5	4.82432e-10	2	ESR2	-0.227692
479	MA0259.1	4.86448e-05	0.206416	0.555	0.489	0.0219875	5	ARNT::HIF1A	0.182653
480	MA0259.1	0.00132573	-0.152346	0.463	0.497	0.59923	2	ARNT::HIF1A	-0.102234
481	MA0259.1	0.00885362	0.114726	0.534	0.485	1	4	ARNT::HIF1A	0.138855
482	MA0442.2	0.00909925	-0.176497	0.47	0.5	1	2	SOX10	-0.0892673
483	MA0442.2	1.37057e-07	0.268865	0.658	0.492	6.19499e-05	7	SOX10	0.419429
484	MA0442.2	0.00120814	-0.120423	0.478	0.504	0.546081	0	SOX10	-0.0764131
485	MA0442.2	0.000269676	0.140722	0.536	0.49	0.121894	4	SOX10	0.129451
486	MA0442.2	3.74698e-18	0.348579	0.586	0.478	1.69364e-15	1	SOX10	0.29389
487	MA0442.2	1.11978e-09	-0.241929	0.357	0.502	5.06142e-07	5	SOX10	-0.491763
488	MA0442.2	0.00256573	-0.101102	0.455	0.502	1	3	SOX10	-0.141821
489	MA0462.1	2.9044e-12	1.92366	0.653	0.475	1.31279e-09	7	BATF::JUN	0.459155
490	MA0462.1	8.57964e-24	-0.866554	0.605	0.46	3.878e-21	4	BATF::JUN	0.395301
491	MA0462.1	0.0020707	-3.2038	0.484	0.477	0.935955	1	BATF::JUN	0.0210178
492	MA0462.1	3.13739e-29	-3.88105	0.268	0.488	1.4181e-26	5	BATF::JUN	-0.864648
493	MA0462.1	2.30375e-82	-3.58116	0.281	0.515	1.0413e-79	2	BATF::JUN	-0.874002
494	MA0462.1	1.12339e-85	-4.19414	0.345	0.539	5.07771e-83	0	BATF::JUN	-0.643689
495	MA0462.1	0	3.09915	0.911	0.409	0	3	BATF::JUN	1.15535
496	MA0464.2	7.47321e-13	-0.316513	0.38	0.483	3.37789e-10	3	BHLHE40	-0.346024
497	MA0464.2	5.12543e-08	-0.291617	0.412	0.477	2.31669e-05	4	BHLHE40	-0.211345
498	MA0464.2	0.00292778	-0.0599917	0.363	0.471	1	7	BHLHE40	-0.375758
499	MA0464.2	1.08497e-37	0.744295	0.75	0.456	4.90407e-35	5	BHLHE40	0.717857
500	MA0464.2	1.11161e-16	0.257127	0.56	0.452	5.02446e-14	1	BHLHE40	0.309104
501	MA0465.1	7.66011e-05	-0.170485	0.453	0.504	0.0346237	2	CDX2	-0.153913
502	MA0465.1	4.88993e-08	0.434834	0.648	0.493	2.21025e-05	7	CDX2	0.394406
503	MA0465.1	4.43804e-14	-0.486235	0.367	0.502	2.00599e-11	5	CDX2	-0.451907
504	MA0465.1	2.38774e-15	0.205883	0.572	0.481	1.07926e-12	1	CDX2	0.249978
505	MA0465.1	0.00997385	-0.040889	0.482	0.503	1	0	CDX2	-0.0615253
506	MA0465.1	0.000846035	0.145489	0.53	0.491	0.382408	4	CDX2	0.110269
507	MA0466.2	4.96106e-13	-1.96081	0.263	0.433	2.2424e-10	6	CEBPB	-0.719304
508	MA0466.2	5.37512e-54	3.98725	0.719	0.413	2.42956e-51	5	CEBPB	0.79985
509	MA0466.2	4.15723e-21	-0.696544	0.527	0.406	1.87907e-18	1	CEBPB	0.376323
510	MA0466.2	1.32118e-76	-2.75121	0.197	0.46	5.97171e-74	4	CEBPB	-1.22344
511	MA0466.2	1.06327e-23	-2.91843	0.145	0.432	4.806e-21	7	CEBPB	-1.57498
512	MA0466.2	9.41779e-08	-1.6689	0.466	0.408	4.25684e-05	0	CEBPB	0.191761
513	MA0468.1	0.00859104	0.0791973	0.531	0.489	1	4	DUX4	0.118877
514	MA0468.1	3.19009e-08	0.531914	0.642	0.491	1.44192e-05	7	DUX4	0.38685
515	MA0468.1	0.00317055	0.0235336	0.552	0.492	1	6	DUX4	0.16601
516	MA0469.2	0.00120939	0.331848	0.554	0.473	0.546643	7	E2F3	0.228046
517	MA0469.2	1.01607e-20	0.635638	0.682	0.465	4.59264e-18	5	E2F3	0.552541
518	MA0469.2	1.62323e-15	-0.385041	0.394	0.487	7.337e-13	3	E2F3	-0.305726
519	MA0470.1	0.000213553	-0.123258	0.46	0.491	0.0965261	0	E2F4	-0.0940892
520	MA0470.1	4.50599e-06	0.130316	0.529	0.472	0.00203671	1	E2F4	0.164481
521	MA0470.1	7.15983e-19	0.216362	0.563	0.466	3.23624e-16	2	E2F4	0.272805
522	MA0470.1	1.92406e-34	0.695072	0.734	0.47	8.69674e-32	5	E2F4	0.643119
523	MA0470.1	6.86751e-05	-0.200485	0.444	0.487	0.0310411	4	E2F4	-0.133362
524	MA0470.1	8.49125e-43	-0.479395	0.323	0.507	3.83804e-40	3	E2F4	-0.650452
525	MA0470.1	0.00265456	0.15495	0.535	0.479	1	6	E2F4	0.159513
526	MA0471.1	0.00773253	0.0868897	0.549	0.487	1	6	E2F6	0.172884
527	MA0471.1	9.73917e-06	0.28766	0.642	0.486	0.0044021	7	E2F6	0.401617
528	MA0471.1	7.3196e-12	0.221855	0.556	0.477	3.30846e-09	1	E2F6	0.221096
529	MA0471.1	3.12207e-05	0.210966	0.576	0.486	0.0141118	5	E2F6	0.245112
530	MA0471.1	3.1818e-24	-0.359273	0.372	0.508	1.43817e-21	3	E2F6	-0.449526
531	MA0471.1	1.41731e-10	-0.180171	0.451	0.507	6.40622e-08	0	E2F6	-0.168858
532	MA0471.1	4.33378e-08	0.147254	0.54	0.48	1.95887e-05	2	E2F6	0.169925
533	MA0472.2	0.0050504	-0.163443	0.445	0.476	1	3	EGR2	-0.0971562
534	MA0472.2	1.4403e-11	-0.22725	0.377	0.486	6.51015e-09	4	EGR2	-0.366392
535	MA0472.2	3.3612e-39	0.77096	0.724	0.461	1.51926e-36	5	EGR2	0.651223
536	MA0472.2	1.37304e-06	0.0945492	0.529	0.461	0.000620615	1	EGR2	0.198501
537	MA0473.2	2.96977e-20	-1.11286	0.202	0.46	1.34234e-17	7	ELF1	-1.18728
538	MA0473.2	9.16281e-07	-0.581721	0.391	0.464	0.000414159	3	ELF1	-0.246956
539	MA0473.2	1.52515e-80	2.07668	0.812	0.438	6.89369e-78	5	ELF1	0.890549
540	MA0473.2	4.47623e-42	0.416218	0.594	0.427	2.02326e-39	1	ELF1	0.476227
541	MA0473.2	2.03725e-21	-0.0439533	0.56	0.435	9.20837e-19	2	ELF1	0.364411
542	MA0473.2	4.95602e-22	-0.715508	0.395	0.481	2.24012e-19	0	ELF1	-0.284184
543	MA0473.2	9.17137e-52	-0.890459	0.275	0.481	4.14546e-49	4	ELF1	-0.806605
544	MA0474.2	7.33314e-13	-0.193634	0.543	0.455	3.31458e-10	3	ERG	0.255086
545	MA0474.2	1.25865e-40	-0.811196	0.311	0.491	5.6891e-38	4	ERG	-0.658808
546	MA0474.2	0.00546361	-0.083201	0.538	0.465	1	6	ERG	0.210375
547	MA0474.2	4.69945e-14	-0.964117	0.306	0.471	2.12415e-11	7	ERG	-0.622195
548	MA0474.2	5.90709e-78	-0.923067	0.347	0.522	2.67001e-75	0	ERG	-0.589114
549	MA0474.2	3.34432e-30	0.0380507	0.586	0.446	1.51163e-27	2	ERG	0.393857
550	MA0474.2	4.35923e-39	1.05716	0.592	0.444	1.97037e-36	1	ERG	0.415037
551	MA0474.2	1.35737e-28	0.981417	0.682	0.458	6.13532e-26	5	ERG	0.574424
552	MA0475.2	0.00176413	-0.065648	0.538	0.462	0.797388	6	FLI1	0.219713
553	MA0475.2	1.43022e-21	-1.12321	0.223	0.471	6.46459e-19	7	FLI1	-1.07868
554	MA0475.2	5.26195e-21	0.771295	0.56	0.447	2.3784e-18	1	FLI1	0.325152
555	MA0475.2	1.30917e-43	-0.75759	0.371	0.508	5.91744e-41	0	FLI1	-0.453409
556	MA0475.2	2.43789e-47	1.3195	0.747	0.453	1.10192e-44	5	FLI1	0.721597
557	MA0475.2	1.12463e-52	-0.847153	0.29	0.491	5.08334e-50	4	FLI1	-0.75967
558	MA0475.2	3.09707e-33	0.138081	0.596	0.441	1.39988e-30	2	FLI1	0.434534
559	MA0475.2	6.36076e-06	-0.274844	0.512	0.458	0.00287507	3	FLI1	0.160796
560	MA0476.1	2.90685e-89	-5.23535	0.27	0.504	1.3139e-86	2	FOS	-0.900464
561	MA0476.1	2.83018e-88	-7.05848	0.317	0.536	1.27924e-85	0	FOS	-0.75775
562	MA0476.1	2.28738e-15	0.460998	0.684	0.463	1.0339e-12	7	FOS	0.562984
563	MA0476.1	6.55296e-26	-3.57252	0.608	0.447	2.96194e-23	4	FOS	0.443796
564	MA0476.1	0	4.93549	0.943	0.391	0	3	FOS	1.27009
565	MA0476.1	3.25038e-34	-5.12647	0.263	0.477	1.46917e-31	5	FOS	-0.858926
566	MA0476.1	1.04042e-05	-4.49941	0.455	0.47	0.00470271	1	FOS	-0.0467942
567	MA0477.1	0.000101354	-4.29289	0.471	0.482	0.0458118	1	FOSL1	-0.0333061
568	MA0477.1	1.8045e-101	-7.45594	0.326	0.55	8.15633e-99	0	FOSL1	-0.75456
569	MA0477.1	8.37324e-49	-6.02267	0.208	0.492	3.78471e-46	5	FOSL1	-1.24207
570	MA0477.1	5.09099e-24	2.81044	0.767	0.474	2.30113e-21	7	FOSL1	0.69434
571	MA0477.1	4.67435e-106	-5.25636	0.263	0.52	2.11281e-103	2	FOSL1	-0.983449
572	MA0477.1	4.14964e-44	-2.62447	0.663	0.453	1.87564e-41	4	FOSL1	0.549498
573	MA0477.1	0	2.75662	0.944	0.406	0	3	FOSL1	1.21731
574	MA0478.1	0	3.32608	0.942	0.399	0	3	FOSL2	1.23934
575	MA0478.1	6.80382e-36	-4.15376	0.643	0.45	3.07533e-33	4	FOSL2	0.514894
576	MA0478.1	1.29566e-21	2.26312	0.731	0.469	5.8564e-19	7	FOSL2	0.640283
577	MA0478.1	2.01012e-05	-4.75637	0.462	0.477	0.00908572	1	FOSL2	-0.0460964
578	MA0478.1	1.96222e-95	-7.87581	0.316	0.547	8.86925e-93	0	FOSL2	-0.791616
579	MA0478.1	1.18204e-41	-6.06002	0.224	0.486	5.34281e-39	5	FOSL2	-1.11746
580	MA0478.1	1.19532e-98	-5.25211	0.274	0.512	5.40283e-96	2	FOSL2	-0.901968
581	MA0479.1	0.00712621	-0.0205883	0.489	0.508	1	2	FOXH1	-0.054994
582	MA0479.1	0.000567582	-0.142936	0.424	0.509	0.256547	5	FOXH1	-0.263601
583	MA0479.1	4.82823e-06	0.368212	0.601	0.503	0.00218236	7	FOXH1	0.256807
584	MA0479.1	6.74971e-09	0.201447	0.572	0.495	3.05087e-06	4	FOXH1	0.208587
585	MA0479.1	0.0043028	-0.126268	0.489	0.513	1	0	FOXH1	-0.0691244
586	MA0481.2	7.76554e-15	-0.507934	0.365	0.518	3.51002e-12	5	FOXP1	-0.505056
587	MA0481.2	7.52296e-49	1.56678	0.891	0.503	3.40038e-46	7	FOXP1	0.824867
588	MA0481.2	0.005507	0.0145322	0.54	0.507	1	3	FOXP1	0.0909737
589	MA0481.2	3.71165e-23	-0.487523	0.419	0.529	1.67767e-20	2	FOXP1	-0.336317
590	MA0481.2	2.16236e-09	-0.289377	0.474	0.529	9.77388e-07	0	FOXP1	-0.158381
591	MA0481.2	4.17032e-56	0.52525	0.692	0.485	1.88498e-53	4	FOXP1	0.512787
592	MA0484.1	0.000282341	-0.11039	0.458	0.509	0.127618	0	HNF4G	-0.152318
593	MA0484.1	0.00645159	-0.0567742	0.477	0.495	1	4	HNF4G	-0.0534393
594	MA0484.1	2.02674e-23	0.301029	0.594	0.474	9.16085e-21	1	HNF4G	0.325576
595	MA0486.2	4.02474e-12	0.351769	0.548	0.469	1.81918e-09	1	HSF1	0.224588
596	MA0486.2	6.39352e-12	-0.215615	0.414	0.492	2.88987e-09	3	HSF1	-0.249028
597	MA0486.2	9.30228e-05	0.101888	0.578	0.477	0.0420463	5	HSF1	0.27708
598	MA0486.2	0.00195688	-0.148971	0.445	0.488	0.884508	2	HSF1	-0.133076
599	MA0488.1	4.79982e-13	-0.240017	0.413	0.487	2.16952e-10	1	JUN	-0.23778
600	MA0488.1	4.01932e-06	-0.66114	0.311	0.479	0.00181673	7	JUN	-0.623111
601	MA0488.1	5.24525e-35	1.37117	0.732	0.464	2.37085e-32	5	JUN	0.657719
602	MA0488.1	5.19623e-28	-0.52681	0.337	0.495	2.34869e-25	4	JUN	-0.55468
603	MA0488.1	0.000394232	-0.180375	0.395	0.478	0.178193	6	JUN	-0.275158
604	MA0488.1	0.00745921	-0.100564	0.493	0.467	1	0	JUN	0.0781651
605	MA0488.1	1.56036e-22	0.192527	0.579	0.458	7.05281e-20	3	JUN	0.338216
606	MA0489.1	1.56175e-42	-5.43648	0.227	0.49	7.05911e-40	5	JUN(var.2)	-1.11009
607	MA0489.1	0.000283096	-3.78952	0.475	0.48	0.12796	1	JUN(var.2)	-0.0151069
608	MA0489.1	4.87062e-93	-4.27861	0.267	0.518	2.20152e-90	2	JUN(var.2)	-0.956112
609	MA0489.1	1.14114e-19	2.36591	0.72	0.474	5.15794e-17	7	JUN(var.2)	0.60311
610	MA0489.1	6.54125e-102	-6.69686	0.328	0.548	2.95664e-99	0	JUN(var.2)	-0.74048
611	MA0489.1	0	3.18061	0.94	0.405	0	3	JUN(var.2)	1.21474
612	MA0489.1	1.21559e-36	-3.34476	0.645	0.454	5.49448e-34	4	JUN(var.2)	0.506607
613	MA0490.1	0	3.07349	0.939	0.395	0	3	JUNB	1.24927
614	MA0490.1	5.19051e-35	-3.36852	0.627	0.447	2.34611e-32	4	JUNB	0.488191
615	MA0490.1	4.00704e-98	-7.77815	0.311	0.542	1.81118e-95	0	JUNB	-0.801378
616	MA0490.1	1.34482e-95	-5.16874	0.272	0.507	6.07858e-93	2	JUNB	-0.898379
617	MA0490.1	1.76788e-20	2.50055	0.72	0.465	7.99083e-18	7	JUNB	0.630766
618	MA0490.1	4.13358e-39	-5.53658	0.24	0.48	1.86838e-36	5	JUNB	-1
619	MA0490.1	1.50159e-05	-4.28161	0.461	0.472	0.00678718	1	JUNB	-0.0340201
620	MA0491.1	1.49176e-93	-9.02632	0.327	0.54	6.74274e-91	0	JUND	-0.723669
621	MA0491.1	0	4.92431	0.941	0.398	0	3	JUND	1.24143
622	MA0491.1	5.01353e-40	-7.66011	0.237	0.484	2.26611e-37	5	JUND	-1.03012
623	MA0491.1	1.83703e-07	-5.3649	0.443	0.479	8.30337e-05	1	JUND	-0.112719
624	MA0491.1	1.983e-35	-4.99274	0.63	0.45	8.96315e-33	4	JUND	0.485427
625	MA0491.1	4.6772e-94	-5.68047	0.276	0.51	2.11409e-91	2	JUND	-0.885829
626	MA0491.1	9.18695e-21	0.648548	0.731	0.468	4.1525e-18	7	JUND	0.643363
627	MA0492.1	1.13137e-16	0.288524	0.574	0.464	5.1138e-14	3	JUND(var.2)	0.306926
628	MA0492.1	2.48944e-20	0.842003	0.672	0.47	1.12523e-17	5	JUND(var.2)	0.5158
629	MA0492.1	1.47331e-07	-0.191014	0.437	0.487	6.65938e-05	1	JUND(var.2)	-0.156288
630	MA0492.1	2.03845e-13	-0.344633	0.391	0.492	9.21381e-11	4	JUND(var.2)	-0.33149
631	MA0495.2	3.99639e-30	1.17999	0.876	0.531	1.80637e-27	7	MAFF	0.722219
632	MA0495.2	4.76261e-60	0.633086	0.72	0.51	2.1527e-57	3	MAFF	0.4975
633	MA0495.2	1.6322e-05	0.117223	0.619	0.536	0.00737755	6	MAFF	0.207706
634	MA0495.2	2.26661e-71	-1.40649	0.18	0.555	1.02451e-68	5	MAFF	-1.62449
635	MA0495.2	5.26476e-89	-0.914547	0.32	0.579	2.37967e-86	2	MAFF	-0.855491
636	MA0495.2	5.1026e-14	-0.468851	0.495	0.559	2.30638e-11	0	MAFF	-0.17542
637	MA0495.2	1.97887e-56	0.442116	0.717	0.513	8.94449e-54	4	MAFF	0.483014
638	MA0496.2	3.03307e-40	0.31556	0.694	0.508	1.37095e-37	4	MAFK	0.450107
639	MA0496.2	3.37803e-70	0.7245	0.726	0.501	1.52687e-67	3	MAFK	0.535159
640	MA0496.2	1.42318e-23	0.836468	0.824	0.526	6.43277e-21	7	MAFK	0.647582
641	MA0496.2	1.10766e-09	-0.394111	0.494	0.549	5.00662e-07	0	MAFK	-0.152295
642	MA0496.2	3.87973e-81	-0.887788	0.323	0.57	1.75364e-78	2	MAFK	-0.819428
643	MA0496.2	5.55183e-67	-1.36758	0.167	0.548	2.50943e-64	5	MAFK	-1.71433
644	MA0496.2	0.00125119	0.060147	0.602	0.529	0.565538	6	MAFK	0.186496
645	MA0497.1	4.67286e-05	0.247524	0.57	0.448	0.0211213	7	MEF2C	0.347463
646	MA0497.1	1.11914e-34	0.621016	0.567	0.428	5.05851e-32	1	MEF2C	0.405738
647	MA0497.1	0.00753025	0.594674	0.518	0.447	1	5	MEF2C	0.212677
648	MA0497.1	3.45698e-08	-0.373842	0.413	0.467	1.56256e-05	0	MEF2C	-0.177281
649	MA0497.1	0.00785069	0.222186	0.471	0.446	1	2	MEF2C	0.0786833
650	MA0497.1	0.000307482	-0.279416	0.42	0.455	0.138982	3	MEF2C	-0.115477
651	MA0497.1	2.96545e-12	-0.689032	0.314	0.456	1.34038e-09	6	MEF2C	-0.538269
652	MA0497.1	1.50006e-05	-0.524143	0.401	0.457	0.00678029	4	MEF2C	-0.188592
653	MA0498.2	5.71708e-14	-0.603751	0.306	0.493	2.58412e-11	7	MEIS1	-0.688056
654	MA0498.2	2.56291e-50	0.500681	0.625	0.463	1.15844e-47	1	MEIS1	0.432844
655	MA0498.2	3.95431e-17	-0.340718	0.395	0.503	1.78735e-14	4	MEIS1	-0.348706
656	MA0498.2	3.04817e-05	-0.187977	0.45	0.496	0.0137777	2	MEIS1	-0.140415
657	MA0501.1	2.60535e-31	-1.70933	0.49	0.596	1.17762e-28	0	MAF::NFE2	-0.282531
658	MA0501.1	6.35407e-174	1.80361	0.842	0.518	2.87204e-171	3	MAF::NFE2	0.700868
659	MA0501.1	2.94385e-06	-0.508238	0.623	0.551	0.00133062	1	MAF::NFE2	0.17718
660	MA0501.1	1.44422e-193	-2.25875	0.233	0.623	6.52786e-191	2	MAF::NFE2	-1.4189
661	MA0501.1	0.000324084	-0.760357	0.653	0.559	0.146486	6	MAF::NFE2	0.224235
662	MA0501.1	8.61154e-79	-0.270158	0.82	0.525	3.89242e-76	4	MAF::NFE2	0.643306
663	MA0501.1	4.17034e-47	2.33551	0.933	0.555	1.88499e-44	7	MAF::NFE2	0.749389
664	MA0501.1	2.77146e-103	-3.09397	0.12	0.583	1.2527e-100	5	MAF::NFE2	-2.28046
665	MA0502.1	5.01988e-06	0.786458	0.576	0.486	0.00226899	5	NFYB	0.245112
666	MA0502.1	2.77022e-23	0.257901	0.586	0.472	1.25214e-20	1	NFYB	0.312114
667	MA0502.1	9.9776e-36	1.12016	0.813	0.483	4.50988e-33	7	NFYB	0.751232
668	MA0502.1	1.30389e-14	0.11953	0.572	0.478	5.89359e-12	4	NFYB	0.259005
669	MA0502.1	2.60322e-81	-0.828307	0.294	0.522	1.17665e-78	3	NFYB	-0.828234
670	MA0502.1	2.26353e-19	-0.427065	0.434	0.515	1.02312e-16	0	NFYB	-0.246877
671	MA0502.1	4.96116e-09	0.481394	0.605	0.485	2.24244e-06	6	NFYB	0.31895
672	MA0504.1	4.42945e-22	-0.373242	0.363	0.492	2.00211e-19	4	NR2C2	-0.438689
673	MA0504.1	1.73157e-48	0.505033	0.625	0.447	7.82669e-46	1	NR2C2	0.483581
674	MA0504.1	5.92742e-08	0.389518	0.581	0.471	2.6792e-05	5	NR2C2	0.302811
675	MA0504.1	7.04821e-09	-0.536271	0.311	0.479	3.18579e-06	7	NR2C2	-0.623111
676	MA0504.1	0.000615356	-0.242272	0.401	0.479	0.278141	6	NR2C2	-0.256423
677	MA0504.1	0.00503394	-0.149446	0.453	0.479	1	3	NR2C2	-0.0805146
678	MA0506.1	3.15246e-29	0.012978	0.512	0.409	1.42491e-26	0	NRF1	0.324043
679	MA0506.1	4.97232e-28	-0.647741	0.323	0.458	2.24749e-25	4	NRF1	-0.503813
680	MA0506.1	5.77931e-113	1.80282	0.885	0.421	2.61225e-110	5	NRF1	1.07186
681	MA0506.1	8.67679e-42	-0.68743	0.305	0.463	3.92191e-39	3	NRF1	-0.602203
682	MA0506.1	6.17233e-16	-0.709785	0.197	0.446	2.78989e-13	7	NRF1	-1.17885
683	MA0507.1	0.00440102	-0.695657	0.445	0.484	1	4	POU2F2	-0.121202
684	MA0507.1	0.00149685	-0.344435	0.58	0.477	0.676577	7	POU2F2	0.282064
685	MA0507.1	8.81372e-09	3.00513	0.612	0.473	3.9838e-06	5	POU2F2	0.371691
686	MA0507.1	6.48794e-06	-0.821416	0.438	0.486	0.00293255	3	POU2F2	-0.150025
687	MA0507.1	0.0025844	-0.598777	0.506	0.474	1	2	POU2F2	0.0942503
688	MA0508.2	5.82915e-17	0.78242	0.684	0.481	2.63478e-14	7	PRDM1	0.507959
689	MA0508.2	2.93992e-16	-0.555414	0.328	0.492	1.32884e-13	6	PRDM1	-0.584963
690	MA0508.2	1.60103e-13	0.527474	0.646	0.478	7.23666e-11	5	PRDM1	0.434524
691	MA0508.2	7.20301e-06	-0.192039	0.448	0.491	0.00325576	3	PRDM1	-0.132224
692	MA0508.2	0.000827696	-0.170878	0.448	0.492	0.374119	2	PRDM1	-0.13516
693	MA0508.2	2.88475e-13	0.200684	0.557	0.471	1.30391e-10	1	PRDM1	0.24195
694	MA0508.2	0.0002482	-0.112339	0.461	0.496	0.112186	0	PRDM1	-0.105573
695	MA0510.2	5.78279e-20	0.258287	0.613	0.491	2.61382e-17	2	RFX5	0.320164
696	MA0510.2	6.38357e-10	0.0697645	0.543	0.495	2.88537e-07	0	RFX5	0.133524
697	MA0510.2	4.00545e-13	-0.351649	0.429	0.523	1.81046e-10	3	RFX5	-0.285833
698	MA0510.2	5.64213e-18	1.0901	0.741	0.505	2.55024e-15	7	RFX5	0.55319
699	MA0510.2	3.38755e-09	0.00696141	0.58	0.5	1.53117e-06	4	RFX5	0.214125
700	MA0510.2	2.23779e-51	-0.432163	0.369	0.537	1.01148e-48	1	RFX5	-0.541301
701	MA0510.2	1.48903e-06	-0.14495	0.409	0.515	0.000673042	5	RFX5	-0.332472
702	MA0511.2	6.87701e-28	0.659986	0.591	0.465	3.10841e-25	1	RUNX2	0.345927
703	MA0511.2	3.09456e-15	-0.940625	0.249	0.49	1.39874e-12	7	RUNX2	-0.976636
704	MA0511.2	1.85231e-20	-0.531044	0.305	0.493	8.37244e-18	5	RUNX2	-0.692778
705	MA0511.2	3.54905e-30	-0.580771	0.41	0.519	1.60417e-27	0	RUNX2	-0.340111
706	MA0511.2	8.52004e-16	0.136184	0.569	0.47	3.85106e-13	2	RUNX2	0.275768
707	MA0511.2	2.47e-31	-0.577093	0.343	0.506	1.11644e-28	4	RUNX2	-0.560929
708	MA0511.2	6.43216e-59	0.476126	0.67	0.455	2.90734e-56	3	RUNX2	0.558295
709	MA0513.1	2.25612e-19	-0.817851	0.233	0.501	1.01977e-16	7	SMAD2::SMAD3::SMAD4	-1.10448
710	MA0513.1	6.25176e-29	0.358738	0.614	0.476	2.8258e-26	3	SMAD2::SMAD3::SMAD4	0.367277
711	MA0513.1	6.87968e-14	0.233104	0.563	0.482	3.10962e-11	1	SMAD2::SMAD3::SMAD4	0.224102
712	MA0513.1	3.41768e-14	-0.314407	0.349	0.502	1.54479e-11	5	SMAD2::SMAD3::SMAD4	-0.52446
713	MA0513.1	1.65284e-09	-0.271053	0.425	0.505	7.47085e-07	4	SMAD2::SMAD3::SMAD4	-0.248821
714	MA0516.1	3.93765e-98	0.55139	0.657	0.415	1.77982e-95	1	SP2	0.662782
715	MA0516.1	9.5663e-15	-0.299755	0.398	0.48	4.32397e-12	0	SP2	-0.270266
716	MA0516.1	3.27886e-07	0.0921646	0.518	0.442	0.000148204	2	SP2	0.228906
717	MA0516.1	0.00329502	0.265156	0.534	0.452	1	7	SP2	0.240517
718	MA0516.1	6.02713e-34	0.663014	0.716	0.442	2.72426e-31	5	SP2	0.695913
719	MA0516.1	4.58183e-06	0.255736	0.535	0.451	0.00207099	6	SP2	0.246411
720	MA0516.1	6.95032e-114	-0.731732	0.218	0.492	3.14155e-111	3	SP2	-1.17433
721	MA0516.1	5.85278e-09	-0.286619	0.387	0.464	2.64546e-06	4	SP2	-0.261791
722	MA0517.1	3.32531e-06	-3.654	0.513	0.397	0.00150304	7	STAT1::STAT2	0.36982
723	MA0517.1	5.65152e-52	-4.80686	0.254	0.422	2.55449e-49	3	STAT1::STAT2	-0.732415
724	MA0517.1	0.0055302	-3.42481	0.427	0.394	1	2	STAT1::STAT2	0.11604
725	MA0517.1	8.31131e-69	6.71456	0.753	0.383	3.75671e-66	5	STAT1::STAT2	0.975305
726	MA0517.1	0.0074734	-4.66856	0.34	0.408	1	4	STAT1::STAT2	-0.263034
727	MA0517.1	4.30107e-50	-5.54292	0.132	0.41	1.94408e-47	6	STAT1::STAT2	-1.63509
728	MA0517.1	1.07293e-41	-2.98841	0.534	0.373	4.84965e-39	1	STAT1::STAT2	0.517664
729	MA0522.2	4.12868e-51	-0.89342	0.134	0.456	1.86616e-48	6	TCF3	-1.7668
730	MA0522.2	0.000646112	-0.380281	0.459	0.436	0.292042	0	TCF3	0.074166
731	MA0522.2	7.25473e-31	-1.50068	0.297	0.465	3.27914e-28	4	TCF3	-0.646768
732	MA0522.2	6.68356e-33	0.410955	0.563	0.42	3.02097e-30	1	TCF3	0.422746
733	MA0522.2	1.2883e-35	-2.16473	0.145	0.45	5.8231e-33	7	TCF3	-1.63387
734	MA0522.2	1.20796e-06	1.1369	0.367	0.447	0.000545996	5	TCF3	-0.284495
735	MA0522.2	3.55255e-21	0.566193	0.538	0.426	1.60575e-18	2	TCF3	0.336753
736	MA0523.1	0.000566544	-0.814835	0.504	0.477	0.256078	1	TCF7L2	0.0794345
737	MA0523.1	0.00240641	-1.07274	0.508	0.47	1	0	TCF7L2	0.112168
738	MA0523.1	0.001747	-0.983525	0.448	0.488	0.789644	2	TCF7L2	-0.123382
739	MA0524.2	0.00380318	0.0637977	0.534	0.498	1	1	TFAP2C	0.100694
740	MA0524.2	7.39418e-06	-0.198398	0.417	0.507	0.00334217	5	TFAP2C	-0.281938
741	MA0524.2	1.84018e-06	0.156759	0.554	0.495	0.000831762	3	TFAP2C	0.162457
742	MA0525.2	0.00267541	0.195086	0.555	0.483	1	5	TP63	0.200465
743	MA0526.2	5.10421e-11	-0.401552	0.388	0.475	2.3071e-08	3	USF2	-0.291871
744	MA0526.2	4.54905e-24	-0.555294	0.341	0.481	2.05617e-21	4	USF2	-0.496265
745	MA0526.2	1.09286e-07	-0.657182	0.321	0.466	4.93972e-05	7	USF2	-0.537757
746	MA0526.2	2.38868e-48	0.638781	0.612	0.434	1.07968e-45	1	USF2	0.495837
747	MA0526.2	0.00236138	-0.238319	0.409	0.465	1	6	USF2	-0.18513
748	MA0526.2	1.06421e-47	0.947975	0.766	0.449	4.81024e-45	5	USF2	0.770629
749	MA0526.2	0.003959	-0.261805	0.442	0.472	1	0	USF2	-0.0947405
750	MA0527.1	6.42108e-40	0.817535	0.74	0.46	2.90233e-37	5	ZBTB33	0.685891
751	MA0527.1	2.35315e-10	-0.269148	0.403	0.482	1.06362e-07	4	ZBTB33	-0.258253
752	MA0527.1	1.13092e-14	-0.356415	0.387	0.486	5.11177e-12	3	ZBTB33	-0.328623
753	MA0527.1	0.00892951	0.0842717	0.489	0.469	1	2	ZBTB33	0.0602465
754	MA0527.1	0.000923314	0.0403881	0.497	0.461	0.417338	0	ZBTB33	0.108479
755	MA0528.1	2.38904e-06	0.0445652	0.532	0.46	0.00107985	2	ZNF263	0.209792
756	MA0528.1	7.68737e-23	-0.833972	0.181	0.477	3.47469e-20	7	ZNF263	-1.398
757	MA0528.1	2.72437e-12	-0.53916	0.311	0.478	1.23142e-09	6	ZNF263	-0.620096
758	MA0528.1	7.81654e-12	-0.315131	0.396	0.483	3.53307e-09	3	ZNF263	-0.286523
759	MA0528.1	5.97808e-32	-0.536598	0.33	0.492	2.70209e-29	4	ZNF263	-0.576192
760	MA0528.1	4.79808e-05	0.850401	0.552	0.467	0.0216873	5	ZNF263	0.241246
761	MA0528.1	1.40791e-86	0.60419	0.663	0.434	6.36375e-84	1	ZNF263	0.611314
762	MA0593.1	0.00198858	-0.200377	0.484	0.518	0.898837	1	FOXP2	-0.0979451
763	MA0593.1	0.00051653	0.0369092	0.585	0.51	0.233472	6	FOXP2	0.197939
764	MA0593.1	1.51813e-10	-0.402546	0.372	0.519	6.86197e-08	5	FOXP2	-0.480432
765	MA0593.1	5.28429e-07	-0.227153	0.481	0.527	0.00023885	0	FOXP2	-0.131766
766	MA0593.1	8.41555e-44	1.40021	0.865	0.505	3.80383e-41	7	FOXP2	0.776417
767	MA0593.1	7.75103e-45	0.514732	0.661	0.491	3.50347e-42	4	FOXP2	0.428927
768	MA0593.1	1.36789e-17	-0.39908	0.442	0.526	6.18285e-15	2	FOXP2	-0.251016
769	MA0595.1	0.00134912	0.0824772	0.536	0.495	0.609804	1	SREBF1	0.114804
770	MA0595.1	0.00940707	-0.0989918	0.479	0.505	1	4	SREBF1	-0.0762577
771	MA0595.1	0.00411876	-0.128604	0.44	0.505	1	6	SREBF1	-0.19878
772	MA0595.1	0.000721539	-0.128271	0.463	0.509	0.326136	2	SREBF1	-0.136653
773	MA0595.1	1.14573e-13	0.234737	0.575	0.49	5.17868e-11	3	SREBF1	0.23078
774	MA0595.1	1.94903e-09	-0.55232	0.321	0.506	8.8096e-07	7	SREBF1	-0.656564
775	MA0596.1	2.61525e-08	-0.550533	0.295	0.501	1.18209e-05	7	SREBF2	-0.764096
776	MA0596.1	3.5712e-24	0.369076	0.608	0.479	1.61418e-21	3	SREBF2	0.344046
777	MA0596.1	5.95136e-05	-0.312216	0.424	0.5	0.0269001	5	SREBF2	-0.237864
778	MA0596.1	0.000297224	-0.100238	0.458	0.504	0.134345	2	SREBF2	-0.138076
779	MA0596.1	7.11255e-05	-0.187795	0.452	0.503	0.0321487	4	SREBF2	-0.154236
780	MA0597.1	4.60862e-21	-0.52884	0.302	0.516	2.0831e-18	5	THAP1	-0.772823
781	MA0597.1	5.18624e-13	0.241342	0.595	0.492	2.34418e-10	3	THAP1	0.274231
782	MA0597.1	0.00527215	-0.0507714	0.492	0.513	1	0	THAP1	-0.0603005
783	MA0597.1	0.000352476	-0.0922683	0.46	0.515	0.159319	2	THAP1	-0.162939
784	MA0597.1	2.22752e-07	0.116426	0.554	0.498	0.000100684	1	THAP1	0.15374
785	MA0598.2	4.4438e-05	-0.640738	0.412	0.469	0.020086	3	EHF	-0.186944
786	MA0598.2	1.15577e-57	-1.05986	0.284	0.487	5.22407e-55	4	EHF	-0.778031
787	MA0598.2	1.08261e-73	2.2831	0.82	0.445	4.8934e-71	5	EHF	0.881819
788	MA0598.2	1.94474e-29	-0.012101	0.581	0.439	8.79024e-27	2	EHF	0.404317
789	MA0598.2	1.79691e-47	0.364594	0.594	0.435	8.12204e-45	1	EHF	0.449448
790	MA0598.2	4.98598e-34	-1.41521	0.161	0.467	2.25366e-31	7	EHF	-1.53636
791	MA0598.2	2.73709e-20	-0.799707	0.4	0.488	1.23716e-17	0	EHF	-0.286881
792	MA0599.1	6.24057e-13	-0.588373	0.238	0.446	2.82074e-10	7	KLF5	-0.906082
793	MA0599.1	5.86007e-63	1.12851	0.792	0.426	2.64875e-60	5	KLF5	0.894647
794	MA0599.1	1.66192e-55	-0.66392	0.243	0.47	7.51187e-53	4	KLF5	-0.951704
795	MA0599.1	2.77949e-122	0.643179	0.684	0.394	1.25633e-119	1	KLF5	0.795801
796	MA0599.1	5.0643e-59	-0.680353	0.27	0.469	2.28906e-56	3	KLF5	-0.796629
797	MA0599.1	9.2965e-11	-0.405202	0.401	0.459	4.20202e-08	0	KLF5	-0.194892
798	MA0599.1	5.97371e-11	0.145892	0.506	0.429	2.70012e-08	2	KLF5	0.23816
799	MA0600.2	1.54946e-11	0.0511367	0.549	0.49	7.00357e-09	0	RFX2	0.164024
800	MA0600.2	2.91877e-57	-0.430619	0.361	0.537	1.31928e-54	1	RFX2	-0.572923
801	MA0600.2	0.000481836	-0.0948133	0.427	0.512	0.21779	5	RFX2	-0.261908
802	MA0600.2	4.64103e-10	0.102566	0.575	0.498	2.09775e-07	4	RFX2	0.207416
803	MA0600.2	2.31516e-15	-0.338366	0.418	0.523	1.04645e-12	3	RFX2	-0.323308
804	MA0600.2	2.60291e-19	0.228714	0.606	0.49	1.17651e-16	2	RFX2	0.306536
805	MA0600.2	1.32036e-14	1.01871	0.725	0.503	5.96802e-12	7	RFX2	0.527423
806	MA0610.1	2.18425e-06	-0.458859	0.337	0.488	0.000987279	7	DMRT3	-0.534133
807	MA0610.1	0.000492484	-0.0522635	0.444	0.491	0.222603	4	DMRT3	-0.145163
808	MA0612.1	0.000306629	-0.082659	0.486	0.502	0.138596	2	EMX1	-0.0467311
809	MA0612.1	9.75395e-11	0.257874	0.563	0.49	4.40879e-08	4	EMX1	0.200353
810	MA0612.1	5.11052e-13	0.61781	0.715	0.495	2.30996e-10	7	EMX1	0.530515
811	MA0612.1	0.00672257	-0.0543715	0.488	0.505	1	0	EMX1	-0.0494022
812	MA0613.1	9.00562e-07	-0.15755	0.477	0.519	0.000407054	0	FOXG1	-0.121745
813	MA0613.1	6.8663e-33	0.318927	0.653	0.485	3.10357e-30	4	FOXG1	0.429098
814	MA0613.1	1.94752e-05	-0.105642	0.452	0.517	0.0088028	1	FOXG1	-0.193842
815	MA0613.1	6.14273e-05	-0.239444	0.465	0.514	0.0277651	2	FOXG1	-0.144538
816	MA0613.1	1.81403e-05	-0.292611	0.422	0.51	0.00819944	5	FOXG1	-0.273254
817	MA0613.1	2.19847e-39	1.16485	0.87	0.498	9.93707e-37	7	FOXG1	0.80487
818	MA0618.1	3.22082e-12	0.252388	0.587	0.483	1.45581e-09	4	LBX1	0.281337
819	MA0618.1	0.000118942	-0.100728	0.454	0.503	0.0537617	3	LBX1	-0.147866
820	MA0618.1	3.28214e-13	0.729286	0.694	0.492	1.48353e-10	7	LBX1	0.496277
821	MA0618.1	0.00517743	-0.240962	0.451	0.498	1	5	LBX1	-0.143018
822	MA0618.1	8.47588e-06	-0.148341	0.45	0.505	0.0038311	2	LBX1	-0.166358
823	MA0618.1	0.00417611	-0.105447	0.478	0.505	1	0	LBX1	-0.0792728
824	MA0618.1	0.00514169	0.160768	0.543	0.494	1	6	LBX1	0.136441
825	MA0620.2	3.24344e-06	-0.329528	0.426	0.478	0.00146604	3	MITF	-0.166157
826	MA0620.2	5.62351e-10	-0.733951	0.306	0.474	2.54183e-07	7	MITF	-0.631355
827	MA0620.2	0.00189545	-0.233992	0.445	0.482	0.856743	0	MITF	-0.115228
828	MA0620.2	4.41696e-23	-0.471155	0.357	0.488	1.99646e-20	4	MITF	-0.450957
829	MA0620.2	1.07963e-51	0.703185	0.617	0.442	4.87993e-49	1	MITF	0.481224
830	MA0620.2	2.80353e-31	0.720799	0.706	0.46	1.26719e-28	5	MITF	0.618034
831	MA0625.1	2.89641e-36	-0.698567	0.338	0.497	1.30918e-33	3	NFATC3	-0.556223
832	MA0625.1	8.75659e-78	1.00745	0.664	0.439	3.95798e-75	1	NFATC3	0.596962
833	MA0625.1	1.16334e-15	0.46735	0.71	0.47	5.2583e-13	7	NFATC3	0.595158
834	MA0625.1	1.19963e-31	-0.554489	0.401	0.509	5.42231e-29	0	NFATC3	-0.344063
835	MA0625.1	0.0012628	-0.0567024	0.509	0.47	0.570784	4	NFATC3	0.115005
836	MA0628.1	2.45774e-05	-0.364974	0.419	0.504	0.011109	5	POU6F1	-0.266473
837	MA0628.1	1.98136e-18	0.338727	0.601	0.486	8.95576e-16	4	POU6F1	0.306409
838	MA0628.1	3.45746e-19	0.896426	0.741	0.496	1.56277e-16	7	POU6F1	0.579133
839	MA0628.1	8.3816e-05	-0.195537	0.472	0.514	0.0378848	0	POU6F1	-0.122981
840	MA0628.1	0.00845929	0.0769636	0.549	0.499	1	6	POU6F1	0.137766
841	MA0628.1	2.84046e-05	-0.153065	0.47	0.507	0.0128389	2	POU6F1	-0.109325
842	MA0630.1	1.9866e-16	0.61823	0.72	0.491	8.97944e-14	7	SHOX	0.552274
843	MA0630.1	0.000814177	-0.112867	0.459	0.503	0.368008	2	SHOX	-0.132064
844	MA0630.1	8.62649e-06	-0.166209	0.442	0.505	0.00389918	3	SHOX	-0.192237
845	MA0630.1	6.59898e-05	0.198284	0.588	0.492	0.0298274	6	SHOX	0.257158
846	MA0630.1	1.54281e-11	0.315541	0.576	0.484	6.97349e-09	4	SHOX	0.251062
847	MA0630.1	0.00589162	-0.24761	0.445	0.498	1	5	SHOX	-0.16234
848	MA0634.1	2.1029e-07	0.363076	0.648	0.484	9.5051e-05	7	ALX3	0.420987
849	MA0634.1	0.00325269	0.108993	0.514	0.484	1	4	ALX3	0.0867613
850	MA0634.1	0.0058303	-0.139136	0.464	0.492	1	3	ALX3	-0.0845335
851	MA0635.1	0.00468189	0.146726	0.523	0.487	1	4	BARHL2	0.102889
852	MA0636.1	2.20148e-28	0.412147	0.577	0.443	9.9507e-26	1	BHLHE41	0.381265
853	MA0636.1	1.06509e-16	-0.378705	0.367	0.48	4.81421e-14	3	BHLHE41	-0.387254
854	MA0636.1	1.6339e-43	0.904363	0.745	0.452	7.38522e-41	5	BHLHE41	0.720918
855	MA0636.1	1.38778e-12	-0.40808	0.39	0.476	6.27278e-10	4	BHLHE41	-0.287487
856	MA0636.1	9.64119e-05	-0.362961	0.342	0.467	0.0435782	7	BHLHE41	-0.449426
857	MA0637.1	2.21797e-22	0.657809	0.693	0.467	1.00252e-19	5	CENPB	0.569433
858	MA0637.1	1.06517e-09	-0.159951	0.411	0.487	4.81458e-07	3	CENPB	-0.244783
859	MA0638.1	6.19915e-06	-0.196369	0.41	0.483	0.00280202	4	CREB3	-0.236399
860	MA0638.1	7.36178e-22	0.65069	0.669	0.465	3.32753e-19	5	CREB3	0.524775
861	MA0639.1	6.12012e-10	-0.287695	0.408	0.495	2.7663e-07	2	DBP	-0.278859
862	MA0639.1	0.000227341	-0.148123	0.446	0.487	0.102758	3	DBP	-0.126878
863	MA0639.1	0.00123161	-0.439645	0.423	0.484	0.556687	6	DBP	-0.194349
864	MA0639.1	6.83481e-06	-0.326129	0.428	0.489	0.00308933	4	DBP	-0.192224
865	MA0639.1	0.000386074	0.550127	0.544	0.479	0.174505	5	DBP	0.183581
866	MA0639.1	1.32247e-38	0.623171	0.61	0.457	5.97755e-36	1	DBP	0.416615
867	MA0640.1	6.78997e-47	-1.0557	0.302	0.487	3.06907e-44	4	ELF3	-0.689373
868	MA0640.1	1.49538e-58	0.501794	0.635	0.43	6.75911e-56	1	ELF3	0.56242
869	MA0640.1	2.19259e-23	-0.828438	0.398	0.493	9.91051e-21	0	ELF3	-0.308819
870	MA0640.1	3.63627e-30	-1.47101	0.187	0.469	1.64359e-27	7	ELF3	-1.32655
871	MA0640.1	8.28919e-13	-0.252576	0.534	0.45	3.74672e-10	2	ELF3	0.246915
872	MA0640.1	4.3045e-69	2.29344	0.794	0.448	1.94563e-66	5	ELF3	0.82564
873	MA0641.1	2.60336e-35	-1.43478	0.166	0.458	1.17672e-32	7	ELF4	-1.46416
874	MA0641.1	9.05167e-08	-0.650056	0.388	0.462	4.09136e-05	3	ELF4	-0.251836
875	MA0641.1	1.25012e-18	-0.714095	0.395	0.478	5.65055e-16	0	ELF4	-0.275158
876	MA0641.1	3.29895e-32	0.062361	0.571	0.43	1.49112e-29	2	ELF4	0.409154
877	MA0641.1	1.26567e-86	2.11703	0.831	0.435	5.72081e-84	5	ELF4	0.933833
878	MA0641.1	8.64582e-67	-1.04235	0.258	0.481	3.90791e-64	4	ELF4	-0.898666
879	MA0641.1	3.85776e-46	0.404247	0.599	0.424	1.74371e-43	1	ELF4	0.498492
880	MA0642.1	3.13921e-09	0.461928	0.668	0.488	1.41892e-06	7	EN2	0.452967
881	MA0642.1	8.74236e-10	-0.304884	0.434	0.502	3.95155e-07	3	EN2	-0.209992
882	MA0642.1	2.28706e-05	0.10598	0.532	0.485	0.0103375	1	EN2	0.133441
883	MA0642.1	4.7692e-09	0.207586	0.562	0.482	2.15568e-06	4	EN2	0.221537
884	MA0642.1	0.000191125	-0.0775033	0.458	0.498	0.0863883	2	EN2	-0.120798
885	MA0644.1	5.1371e-05	0.10251	0.555	0.491	0.0232197	1	ESX1	0.176765
886	MA0644.1	6.94646e-08	-0.230846	0.436	0.514	3.1398e-05	2	ESX1	-0.23744
887	MA0644.1	0.0067314	-0.0620957	0.458	0.504	1	5	ESX1	-0.138076
888	MA0644.1	2.21913e-11	0.321121	0.575	0.491	1.00305e-08	4	ESX1	0.227839
889	MA0644.1	7.39656e-10	0.700864	0.684	0.498	3.34324e-07	7	ESX1	0.457851
890	MA0644.1	0.00315622	0.110713	0.588	0.498	1	6	ESX1	0.23967
891	MA0644.1	9.86622e-05	-0.165355	0.45	0.51	0.0445953	3	ESX1	-0.180572
892	MA0644.1	0.00351846	-0.149594	0.482	0.511	1	0	ESX1	-0.0842901
893	MA0645.1	1.02229e-20	-1.10452	0.404	0.505	4.62074e-18	0	ETV6	-0.321928
894	MA0645.1	7.45637e-115	-1.65207	0.208	0.513	3.37028e-112	4	ETV6	-1.30238
895	MA0645.1	4.2801e-84	-2.92812	0.021	0.483	1.93461e-81	7	ETV6	-4.52356
896	MA0645.1	4.54997e-08	-0.995617	0.359	0.478	2.05659e-05	6	ETV6	-0.413027
897	MA0645.1	1.0287e-28	0.0594666	0.581	0.453	4.64974e-26	1	ETV6	0.359027
898	MA0645.1	1.44518e-50	-0.182866	0.627	0.445	6.53221e-48	2	ETV6	0.49466
899	MA0645.1	2.65828e-57	2.85356	0.773	0.46	1.20154e-54	5	ETV6	0.748835
900	MA0645.1	3.37495e-19	-0.538092	0.588	0.455	1.52548e-16	3	ETV6	0.36995
901	MA0646.1	0.000931292	0.0502842	0.508	0.477	0.420944	0	GCM1	0.0908392
902	MA0646.1	0.000405551	-0.079581	0.462	0.491	0.183309	1	GCM1	-0.0878302
903	MA0647.1	8.35597e-18	0.433722	0.584	0.486	3.7769e-15	4	GRHL1	0.265012
904	MA0647.1	1.60886e-13	0.735347	0.694	0.494	7.27206e-11	7	GRHL1	0.490425
905	MA0647.1	2.69695e-09	-0.213906	0.437	0.51	1.21902e-06	2	GRHL1	-0.222864
906	MA0648.1	3.08734e-08	0.367372	0.689	0.486	1.39548e-05	7	GSC	0.503548
907	MA0648.1	1.8755e-06	0.261554	0.557	0.481	0.000847724	4	GSC	0.21164
908	MA0648.1	7.02511e-05	-0.0971859	0.462	0.504	0.0317535	0	GSC	-0.125531
909	MA0648.1	0.000285588	0.236079	0.569	0.487	0.129086	6	GSC	0.224507
910	MA0648.1	0.00731384	-0.151585	0.472	0.494	1	3	GSC	-0.0657242
911	MA0649.1	0.000498416	-0.24995	0.352	0.484	0.225284	7	HEY2	-0.459432
912	MA0649.1	2.05507e-06	-0.237988	0.423	0.49	0.000928891	4	HEY2	-0.212124
913	MA0649.1	7.43639e-16	0.526712	0.635	0.475	3.36125e-13	5	HEY2	0.418829
914	MA0649.1	0.00558155	0.0954799	0.498	0.474	1	0	HEY2	0.0712587
915	MA0650.1	0.000692068	-0.207831	0.404	0.502	0.312815	5	HOXA13	-0.313332
916	MA0650.1	1.70771e-22	0.856857	0.788	0.491	7.71884e-20	7	HOXA13	0.682473
917	MA0650.1	4.72185e-09	-0.252557	0.431	0.508	2.13427e-06	3	HOXA13	-0.237141
918	MA0650.1	4.76443e-16	0.257942	0.585	0.485	2.15352e-13	4	HOXA13	0.270452
919	MA0651.1	0.000992193	0.415089	0.57	0.485	0.448471	7	HOXC11	0.232977
920	MA0651.1	3.02095e-05	-0.282996	0.403	0.49	0.0136547	6	HOXC11	-0.282002
921	MA0651.1	2.96976e-06	0.127835	0.542	0.476	0.00134233	1	HOXC11	0.187331
922	MA0652.1	9.58659e-31	-1.70817	0.549	0.42	4.33314e-28	1	IRF8	0.386417
923	MA0652.1	0.00284463	-2.4725	0.421	0.45	1	0	IRF8	-0.0961048
924	MA0652.1	7.41454e-61	-3.03201	0.262	0.469	3.35137e-58	3	IRF8	-0.840021
925	MA0652.1	0.00318395	-1.95843	0.481	0.435	1	4	IRF8	0.145021
926	MA0652.1	2.40428e-26	-2.97743	0.21	0.45	1.08673e-23	6	IRF8	-1.09954
927	MA0652.1	9.94705e-40	4.5215	0.706	0.429	4.49607e-37	5	IRF8	0.718691
928	MA0652.1	3.6028e-28	1.25762	0.762	0.434	1.62846e-25	7	IRF8	0.812096
929	MA0653.1	1.96502e-54	6.58832	0.753	0.428	8.88189e-52	5	IRF9	0.815039
930	MA0653.1	0.000125661	-3.78725	0.497	0.434	0.056799	4	IRF9	0.195551
931	MA0653.1	1.08872e-27	-3.32099	0.546	0.422	4.921e-25	1	IRF9	0.371658
932	MA0653.1	7.83202e-06	-4.03042	0.403	0.46	0.00354007	0	IRF9	-0.190854
933	MA0653.1	2.23654e-33	-4.88434	0.21	0.452	1.01091e-30	6	IRF9	-1.10593
934	MA0653.1	2.55533e-30	-1.46809	0.793	0.435	1.15501e-27	7	IRF9	0.866305
935	MA0653.1	4.71825e-64	-4.62614	0.267	0.47	2.13265e-61	3	IRF9	-0.815821
936	MA0654.1	2.06563e-05	-0.1576	0.45	0.498	0.00933665	3	ISX	-0.146221
937	MA0654.1	1.3683e-08	0.281325	0.562	0.481	6.18473e-06	4	ISX	0.224533
938	MA0654.1	0.00476673	-0.084827	0.46	0.497	1	2	ISX	-0.111612
939	MA0654.1	0.00608511	0.166222	0.541	0.49	1	6	ISX	0.142847
940	MA0654.1	5.05194e-09	0.504409	0.689	0.487	2.28348e-06	7	ISX	0.500582
941	MA0655.1	2.1757e-05	0.486996	0.57	0.44	0.00983417	7	JDP2	0.373458
942	MA0655.1	1.25319e-09	-2.42932	0.513	0.432	5.66442e-07	4	JDP2	0.247928
943	MA0655.1	1.62843e-06	-2.99256	0.38	0.446	0.000736048	5	JDP2	-0.231044
944	MA0655.1	2.27218e-24	-4.07036	0.354	0.46	1.02702e-21	1	JDP2	-0.377885
945	MA0655.1	0	4.46673	0.932	0.364	0	3	JDP2	1.35639
946	MA0655.1	5.14412e-83	-4.97806	0.307	0.505	2.32514e-80	0	JDP2	-0.718045
947	MA0655.1	8.39358e-39	-3.12985	0.317	0.466	3.7939e-36	2	JDP2	-0.555847
948	MA0656.1	4.9581e-26	0.669347	0.706	0.472	2.24106e-23	5	JDP2(var.2)	0.580881
949	MA0656.1	2.27397e-12	-0.301539	0.398	0.495	1.02784e-09	4	JDP2(var.2)	-0.31466
950	MA0656.1	0.00466008	0.0151774	0.499	0.475	1	0	JDP2(var.2)	0.0711123
951	MA0656.1	1.09393e-08	-0.0710603	0.433	0.492	4.94456e-06	1	JDP2(var.2)	-0.184291
952	MA0657.1	1.99964e-28	-0.559722	0.326	0.48	9.03835e-26	4	KLF13	-0.558162
953	MA0657.1	5.0292e-05	0.287592	0.541	0.457	0.022732	6	KLF13	0.243434
954	MA0657.1	3.74814e-09	0.206012	0.525	0.449	1.69416e-06	2	KLF13	0.225602
955	MA0657.1	2.63135e-18	0.208326	0.547	0.444	1.18937e-15	1	KLF13	0.300981
956	MA0657.1	2.47419e-49	1.16873	0.758	0.447	1.11833e-46	5	KLF13	0.761923
957	MA0657.1	2.54835e-12	-0.468872	0.259	0.465	1.15185e-09	7	KLF13	-0.844279
958	MA0657.1	5.51657e-44	-0.635125	0.315	0.484	2.49349e-41	3	KLF13	-0.619655
959	MA0658.1	6.35374e-06	-0.108175	0.443	0.511	0.00287189	2	LHX6	-0.206017
960	MA0658.1	1.58812e-12	0.590705	0.705	0.496	7.1783e-10	7	LHX6	0.507283
961	MA0658.1	3.00789e-13	0.364357	0.585	0.488	1.35957e-10	4	LHX6	0.261555
962	MA0659.1	0.000374505	0.104875	0.588	0.52	0.169276	6	MAFG	0.177305
963	MA0659.1	5.08984e-06	-0.263965	0.484	0.541	0.00230061	0	MAFG	-0.160622
964	MA0659.1	8.34449e-46	-1.06891	0.232	0.536	3.77171e-43	5	MAFG	-1.20811
965	MA0659.1	0.0019175	0.0831002	0.565	0.515	0.866708	1	MAFG	0.133678
966	MA0659.1	4.83407e-15	0.474552	0.762	0.518	2.185e-12	7	MAFG	0.556839
967	MA0659.1	2.73407e-32	0.298822	0.67	0.501	1.2358e-29	4	MAFG	0.41935
968	MA0659.1	9.14027e-18	0.549096	0.609	0.509	4.1314e-15	3	MAFG	0.258777
969	MA0659.1	8.60887e-42	-0.599062	0.391	0.547	3.89121e-39	2	MAFG	-0.484372
970	MA0660.1	2.81198e-08	-0.515714	0.391	0.466	1.27101e-05	4	MEF2B	-0.253161
971	MA0660.1	0.000381496	0.0783601	0.585	0.454	0.172436	7	MEF2B	0.365744
972	MA0660.1	1.91221e-64	0.859321	0.613	0.427	8.64318e-62	1	MEF2B	0.521651
973	MA0660.1	1.68847e-08	-0.57686	0.342	0.462	7.6319e-06	6	MEF2B	-0.433897
974	MA0660.1	9.3484e-15	-0.492416	0.408	0.479	4.22548e-12	0	MEF2B	-0.231457
975	MA0661.1	1.61341e-05	-0.306777	0.409	0.502	0.00729262	5	MEOX1	-0.295587
976	MA0661.1	5.74528e-15	0.444128	0.583	0.486	2.59687e-12	4	MEOX1	0.26254
977	MA0661.1	8.6474e-14	0.580065	0.741	0.493	3.90862e-11	7	MEOX1	0.587886
978	MA0662.1	1.00984e-15	0.721182	0.725	0.493	4.56447e-13	7	MIXL1	0.556393
979	MA0662.1	0.00331732	-0.103048	0.475	0.503	1	2	MIXL1	-0.0826309
980	MA0662.1	0.00163504	-0.285054	0.422	0.502	0.739039	5	MIXL1	-0.250444
981	MA0662.1	0.0007237	0.239208	0.583	0.495	0.327112	6	MIXL1	0.236067
982	MA0662.1	3.84803e-13	0.300701	0.581	0.486	1.73931e-10	4	MIXL1	0.257582
983	MA0662.1	0.000117475	-0.175749	0.459	0.505	0.0530987	3	MIXL1	-0.137789
984	MA0663.1	2.52704e-21	0.301536	0.568	0.441	1.14222e-18	1	MLX	0.365112
985	MA0663.1	1.07987e-24	-0.51636	0.342	0.481	4.88101e-22	3	MLX	-0.492041
986	MA0663.1	0.000150732	-0.253413	0.337	0.465	0.0681308	7	MLX	-0.464482
987	MA0663.1	9.10716e-10	-0.370837	0.39	0.472	4.11643e-07	4	MLX	-0.275313
988	MA0663.1	1.02785e-52	1.03522	0.768	0.448	4.64588e-50	5	MLX	0.777608
989	MA0664.1	1.1118e-24	-0.474715	0.356	0.48	5.02532e-22	3	MLXIPL	-0.431157
990	MA0664.1	0.00132625	-0.311216	0.394	0.464	0.599467	7	MLXIPL	-0.235929
991	MA0664.1	8.39887e-13	-0.444301	0.376	0.475	3.79629e-10	4	MLXIPL	-0.337195
992	MA0664.1	2.43689e-28	0.367634	0.571	0.442	1.10147e-25	1	MLXIPL	0.369444
993	MA0664.1	5.25553e-52	0.959989	0.776	0.449	2.3755e-49	5	MLXIPL	0.789341
994	MA0665.1	7.44005e-08	0.124316	0.529	0.466	3.3629e-05	1	MSC	0.182938
995	MA0665.1	3.36377e-17	-0.40453	0.381	0.49	1.52042e-14	4	MSC	-0.362991
996	MA0665.1	7.49799e-12	-0.25244	0.336	0.482	3.38909e-09	6	MSC	-0.520572
997	MA0665.1	1.0222e-09	-0.769381	0.295	0.48	4.62036e-07	7	MSC	-0.702319
998	MA0665.1	0.00027515	-0.0617043	0.432	0.478	0.124368	5	MSC	-0.145979
999	MA0665.1	4.40774e-05	0.11648	0.517	0.47	0.019923	3	MSC	0.137504
1000	MA0665.1	9.92587e-14	0.370077	0.545	0.464	4.48649e-11	2	MSC	0.232131
1001	MA0666.1	1.56106e-07	0.194753	0.549	0.481	7.05598e-05	4	MSX1	0.190769
1002	MA0666.1	0.00152178	0.20422	0.549	0.487	0.687844	6	MSX1	0.172884
1003	MA0666.1	1.31205e-11	-0.247487	0.413	0.502	5.93046e-09	3	MSX1	-0.281546
1004	MA0666.1	0.000119908	0.0766912	0.536	0.481	0.0541985	1	MSX1	0.156196
1005	MA0666.1	6.11812e-08	0.43706	0.632	0.486	2.76539e-05	7	MSX1	0.378968
1006	MA0666.1	0.000390937	-0.103747	0.453	0.496	0.176703	2	MSX1	-0.130829
1007	MA0667.1	3.254e-15	-0.769965	0.259	0.483	1.47081e-12	7	MYF6	-0.899071
1008	MA0667.1	2.18913e-05	0.0803144	0.521	0.47	0.00989488	1	MYF6	0.148623
1009	MA0667.1	6.15111e-18	-0.445863	0.382	0.492	2.7803e-15	4	MYF6	-0.365086
1010	MA0667.1	8.68586e-09	0.250843	0.535	0.468	3.92601e-06	2	MYF6	0.19303
1011	MA0667.1	7.81741e-07	-0.355599	0.392	0.482	0.000353347	6	MYF6	-0.298179
1012	MA0667.1	3.86023e-07	0.231781	0.533	0.469	0.000174482	3	MYF6	0.184548
1013	MA0668.1	2.40342e-07	-0.250438	0.295	0.485	0.000108634	7	NEUROD2	-0.71727
1014	MA0668.1	0.00656047	-0.0745549	0.448	0.486	1	4	NEUROD2	-0.117458
1015	MA0669.1	0.00151336	-0.0594308	0.443	0.478	0.684039	5	NEUROG2	-0.109704
1016	MA0669.1	8.37074e-24	-0.976067	0.192	0.483	3.78357e-21	7	NEUROG2	-1.33092
1017	MA0669.1	2.66519e-07	0.122264	0.532	0.468	0.000120467	3	NEUROG2	0.184918
1018	MA0669.1	1.65067e-21	-0.407498	0.373	0.492	7.46103e-19	4	NEUROG2	-0.399483
1019	MA0669.1	6.98953e-05	-0.195458	0.401	0.48	0.0315927	6	NEUROG2	-0.259432
1020	MA0669.1	7.28712e-19	0.242532	0.565	0.461	3.29378e-16	2	NEUROG2	0.293484
1021	MA0670.1	4.77471e-35	-0.77444	0.247	0.519	2.15817e-32	5	NFIA	-1.07122
1022	MA0670.1	1.58804e-12	-0.251112	0.464	0.528	7.17795e-10	0	NFIA	-0.186413
1023	MA0670.1	4.85594e-22	0.812422	0.777	0.502	2.19488e-19	7	NFIA	0.630227
1024	MA0670.1	4.83928e-08	-0.207692	0.451	0.518	2.18735e-05	2	NFIA	-0.199825
1025	MA0670.1	2.15824e-17	0.254618	0.592	0.491	9.75526e-15	1	NFIA	0.269874
1026	MA0670.1	7.02554e-24	0.251852	0.63	0.49	3.17554e-21	4	NFIA	0.36257
1027	MA0671.1	7.9952e-21	0.283505	0.614	0.497	3.61383e-18	1	NFIX	0.304993
1028	MA0671.1	6.94009e-23	0.301431	0.62	0.5	3.13692e-20	4	NFIX	0.31034
1029	MA0671.1	3.60714e-07	0.109939	0.576	0.506	0.000163043	3	NFIX	0.186931
1030	MA0671.1	0.000860205	-0.233832	0.445	0.519	0.388813	6	NFIX	-0.221929
1031	MA0671.1	2.77954e-12	-0.292454	0.442	0.529	1.25635e-09	2	NFIX	-0.259221
1032	MA0671.1	9.16702e-19	0.760481	0.782	0.51	4.14349e-16	7	NFIX	0.616671
1033	MA0671.1	1.27301e-58	-1.11751	0.198	0.53	5.75401e-56	5	NFIX	-1.42049
1034	MA0671.1	6.86075e-13	-0.223179	0.466	0.538	3.10106e-10	0	NFIX	-0.207276
1035	MA0672.1	0.000402201	-0.163136	0.435	0.503	0.181795	5	NKX2-3	-0.209543
1036	MA0672.1	1.42986e-05	-0.124287	0.448	0.51	0.00646296	2	NKX2-3	-0.186999
1037	MA0672.1	0.00453558	0.0288974	0.551	0.493	1	4	NKX2-3	0.160465
1038	MA0672.1	0.000127183	0.141623	0.53	0.494	0.0574867	1	NKX2-3	0.101481
1039	MA0672.1	6.10882e-11	0.516406	0.705	0.496	2.76119e-08	7	NKX2-3	0.507283
1040	MA0673.1	0.00480021	0.10962	0.537	0.496	1	4	NKX2-8	0.114582
1041	MA0673.1	0.00936071	0.0702568	0.52	0.497	1	1	NKX2-8	0.0652658
1042	MA0673.1	6.83564e-07	-0.22908	0.414	0.505	0.000308971	5	NKX2-8	-0.286653
1043	MA0673.1	3.33998e-07	0.524306	0.637	0.498	0.000150967	7	NKX2-8	0.355148
1044	MA0673.1	2.47315e-07	-0.172171	0.445	0.511	0.000111786	2	NKX2-8	-0.199518
1045	MA0674.1	2.72389e-07	0.190683	0.553	0.486	0.00012312	4	NKX6-1	0.186323
1046	MA0674.1	1.941e-06	0.520782	0.617	0.492	0.000877333	7	NKX6-1	0.326612
1047	MA0675.1	2.72389e-07	0.190683	0.553	0.486	0.00012312	4	NKX6-2	0.186323
1048	MA0675.1	1.941e-06	0.520782	0.617	0.492	0.000877333	7	NKX6-2	0.326612
1049	MA0678.1	0.00653348	0.0623438	0.509	0.479	1	2	OLIG2	0.08764
1050	MA0678.1	0.00031643	-0.328323	0.373	0.486	0.143026	7	OLIG2	-0.381781
1051	MA0679.1	0.00275465	0.279803	0.521	0.476	1	5	ONECUT1	0.130322
1052	MA0679.1	1.79292e-08	-0.175395	0.413	0.488	8.10398e-06	3	ONECUT1	-0.240739
1053	MA0679.1	7.76196e-08	0.503704	0.632	0.474	3.50841e-05	7	ONECUT1	0.415037
1054	MA0680.1	0.00169581	0.172494	0.51	0.482	0.766506	4	PAX7	0.0814641
1055	MA0680.1	0.00284015	-0.114938	0.455	0.491	1	1	PAX7	-0.109856
1056	MA0680.1	0.0062375	-0.149513	0.454	0.491	1	3	PAX7	-0.113031
1057	MA0680.1	1.82311e-06	0.568773	0.617	0.483	0.000824044	7	PAX7	0.353247
1058	MA0683.1	0.000542936	0.0858564	0.566	0.491	0.245407	6	POU4F2	0.205079
1059	MA0683.1	1.02427e-11	0.79398	0.684	0.49	4.62971e-09	7	POU4F2	0.481215
1060	MA0683.1	0.00803395	-0.124648	0.471	0.499	1	1	POU4F2	-0.0833128
1061	MA0683.1	5.56685e-07	0.22197	0.54	0.488	0.000251622	4	POU4F2	0.146078
1062	MA0684.1	3.68306e-31	-1.18063	0.171	0.496	1.66474e-28	7	RUNX3	-1.53634
1063	MA0684.1	7.4899e-34	0.722214	0.602	0.467	3.38543e-31	1	RUNX3	0.366341
1064	MA0684.1	3.56859e-20	-0.595383	0.432	0.515	1.613e-17	0	RUNX3	-0.253541
1065	MA0684.1	2.52511e-51	-0.91241	0.296	0.518	1.14135e-48	4	RUNX3	-0.807355
1066	MA0684.1	1.57538e-27	-0.614471	0.299	0.498	7.1207e-25	5	RUNX3	-0.736
1067	MA0684.1	3.02342e-14	0.0929088	0.573	0.474	1.36659e-11	2	RUNX3	0.273648
1068	MA0684.1	1.04647e-06	-0.45642	0.381	0.494	0.000473004	6	RUNX3	-0.37472
1069	MA0684.1	1.54979e-89	0.654202	0.711	0.453	7.00505e-87	3	RUNX3	0.650339
1070	MA0685.1	2.81244e-08	-0.345021	0.311	0.44	1.27122e-05	7	SP4	-0.500589
1071	MA0685.1	1.30474e-46	-0.801981	0.27	0.462	5.89741e-44	4	SP4	-0.774933
1072	MA0685.1	4.83623e-07	0.281636	0.546	0.433	0.000218598	6	SP4	0.334534
1073	MA0685.1	5.34467e-79	0.397025	0.63	0.401	2.41579e-76	1	SP4	0.65175
1074	MA0685.1	1.98488e-25	0.239674	0.551	0.417	8.97168e-23	2	SP4	0.402005
1075	MA0685.1	2.74515e-105	-1.02876	0.218	0.473	1.24081e-102	3	SP4	-1.11751
1076	MA0685.1	5.4611e-06	-0.478304	0.398	0.456	0.00246842	0	SP4	-0.196265
1077	MA0685.1	8.22917e-69	1.62069	0.768	0.423	3.71959e-66	5	SP4	0.860449
1078	MA0686.1	4.65231e-07	-0.249489	0.444	0.485	0.000210285	0	SPDEF	-0.127425
1079	MA0686.1	0.00111126	-0.160797	0.433	0.478	0.502291	3	SPDEF	-0.142644
1080	MA0686.1	2.65823e-07	0.226581	0.511	0.464	0.000120152	1	SPDEF	0.139198
1081	MA0686.1	1.34944e-19	0.791686	0.659	0.464	6.09946e-17	5	SPDEF	0.506154
1082	MA0686.1	3.12904e-07	-0.103116	0.422	0.479	0.000141433	4	SPDEF	-0.182783
1083	MA0686.1	0.000753231	0.0278222	0.506	0.466	0.34046	2	SPDEF	0.118807
1084	MA0687.1	3.41111e-24	3.34834	0.672	0.465	1.54182e-21	5	SPIC	0.531231
1085	MA0687.1	0.000440179	-1.31884	0.495	0.464	0.198961	0	SPIC	0.0933037
1086	MA0687.1	2.00091e-40	-2.0875	0.196	0.485	9.04409e-38	6	SPIC	-1.30713
1087	MA0687.1	1.83249e-77	0.22993	0.655	0.439	8.28285e-75	1	SPIC	0.577274
1088	MA0687.1	2.39415e-108	-4.73286	0	0.484	1.08216e-105	7	SPIC	#NUM!
1089	MA0687.1	9.39604e-19	-0.886337	0.565	0.457	4.24701e-16	2	SPIC	0.306057
1090	MA0687.1	0.00144789	-1.14799	0.503	0.469	0.654445	3	SPIC	0.10097
1091	MA0687.1	1.79352e-160	-2.48712	0.15	0.521	8.10672e-158	4	SPIC	-1.79632
1092	MA0688.1	0.000156297	-0.298849	0.443	0.494	0.0706463	4	TBX2	-0.157204
1093	MA0688.1	0.00666513	0.0863523	0.528	0.481	1	3	TBX2	0.134501
1094	MA0688.1	2.86383e-05	-0.0339779	0.534	0.479	0.0129445	1	TBX2	0.156814
1095	MA0688.1	2.07573e-05	-0.355489	0.384	0.492	0.00938231	6	TBX2	-0.357552
1096	MA0689.1	0.00620477	-0.137547	0.48	0.495	1	2	TBX20	-0.0443941
1097	MA0689.1	7.46005e-05	0.114106	0.516	0.482	0.0337194	0	TBX20	0.0983379
1098	MA0690.1	0.000438007	-0.283943	0.398	0.492	0.197979	6	TBX21	-0.30589
1099	MA0690.1	0.00178318	-0.230084	0.454	0.493	0.805999	4	TBX21	-0.118895
1100	MA0690.1	0.00105622	0.0883732	0.515	0.484	0.47741	3	TBX21	0.0895654
1101	MA0690.1	1.20762e-05	-0.510656	0.399	0.49	0.00545844	7	TBX21	-0.296393
1102	MA0691.1	0.000258005	0.2145	0.403	0.487	0.116618	6	TFAP4	-0.273142
1103	MA0691.1	5.88651e-20	0.266053	0.582	0.468	2.6607e-17	3	TFAP4	0.314511
1104	MA0691.1	4.19902e-11	-0.336489	0.403	0.496	1.89796e-08	4	TFAP4	-0.29956
1105	MA0691.1	6.82568e-05	-0.185326	0.411	0.487	0.0308521	5	TFAP4	-0.244783
1106	MA0691.1	0.000824272	0.209795	0.514	0.479	0.372571	2	TFAP4	0.101743
1107	MA0691.1	1.42886e-05	-0.53131	0.394	0.486	0.00645847	7	TFAP4	-0.302761
1108	MA0692.1	0.000333411	-0.289099	0.401	0.466	0.150702	6	TFEB	-0.216728
1109	MA0692.1	6.18627e-22	-0.550837	0.347	0.481	2.79619e-19	4	TFEB	-0.471101
1110	MA0692.1	3.48034e-42	0.701894	0.598	0.438	1.57311e-39	1	TFEB	0.449215
1111	MA0692.1	7.92883e-09	-0.619574	0.321	0.467	3.58383e-06	7	TFEB	-0.540849
1112	MA0692.1	4.15558e-37	0.70042	0.729	0.452	1.87832e-34	5	TFEB	0.689596
1113	MA0692.1	2.57808e-06	-0.368648	0.417	0.471	0.00116529	3	TFEB	-0.17568
1114	MA0693.2	3.49398e-05	-0.117758	0.436	0.479	0.0157928	4	VDR	-0.135698
1115	MA0693.2	6.34642e-10	0.247612	0.536	0.462	2.86858e-07	2	VDR	0.21434
1116	MA0693.2	2.81607e-08	-0.568239	0.326	0.477	1.27286e-05	7	VDR	-0.549117
1117	MA0693.2	5.30483e-09	0.361634	0.581	0.469	2.39778e-06	5	VDR	0.30895
1118	MA0693.2	7.52421e-06	-0.205818	0.417	0.483	0.00340094	3	VDR	-0.211976
1119	MA0694.1	0.000716192	-0.0964674	0.438	0.488	0.323719	4	ZBTB7B	-0.15595
1120	MA0694.1	2.78213e-09	0.422445	0.604	0.477	1.25752e-06	5	ZBTB7B	0.340559
1121	MA0694.1	0.00250018	-0.15485	0.449	0.487	1	3	ZBTB7B	-0.117206
1122	MA0694.1	0.000713033	0.0918941	0.497	0.475	0.322291	0	ZBTB7B	0.0653183
1123	MA0695.1	4.60125e-05	-0.19463	0.434	0.494	0.0207976	4	ZBTB7C	-0.186816
1124	MA0695.1	3.5923e-07	0.101121	0.514	0.474	0.000162372	0	ZBTB7C	0.116881
1125	MA0695.1	0.000101039	-0.244216	0.394	0.488	0.0456698	7	ZBTB7C	-0.308686
1126	MA0695.1	5.68542e-05	0.367048	0.57	0.483	0.0256981	5	ZBTB7C	0.238939
1127	MA0695.1	0.000991624	-0.0763529	0.454	0.492	0.448214	3	ZBTB7C	-0.115966
1128	MA0696.1	8.23801e-05	0.183629	0.581	0.488	0.0372358	5	ZIC1	0.251657
1129	MA0696.1	5.95783e-14	-0.186429	0.411	0.508	2.69294e-11	1	ZIC1	-0.30569
1130	MA0696.1	9.07133e-05	0.156918	0.535	0.484	0.0410024	2	ZIC1	0.144532
1131	MA0696.1	3.28983e-07	0.067356	0.522	0.479	0.0001487	0	ZIC1	0.124024
1132	MA0696.1	0.000567281	-0.134144	0.461	0.497	0.256411	3	ZIC1	-0.108479
1133	MA0697.1	0.000331524	0.0433331	0.509	0.475	0.149849	0	ZIC3	0.0997381
1134	MA0697.1	4.12111e-06	-0.0652696	0.449	0.493	0.00186274	1	ZIC3	-0.134872
1135	MA0697.1	0.000534416	0.168018	0.557	0.482	0.241556	5	ZIC3	0.208644
1136	MA0697.1	4.49918e-05	0.120184	0.511	0.481	0.0203363	2	ZIC3	0.0872864
1137	MA0697.1	2.80336e-07	-0.189002	0.43	0.495	0.000126712	3	ZIC3	-0.203092
1138	MA0698.1	3.47845e-51	-0.923608	0.288	0.489	1.57226e-48	4	ZBTB18	-0.763766
1139	MA0698.1	1.52628e-45	-1.60347	0.114	0.47	6.8988e-43	7	ZBTB18	-2.04363
1140	MA0698.1	4.67294e-06	0.085589	0.406	0.465	0.00211217	5	ZBTB18	-0.195751
1141	MA0698.1	9.1505e-15	-0.771982	0.294	0.47	4.13602e-12	6	ZBTB18	-0.676845
1142	MA0698.1	3.76652e-07	0.0152757	0.513	0.453	0.000170247	1	ZBTB18	0.179448
1143	MA0698.1	5.78962e-46	0.709214	0.597	0.438	2.61691e-43	2	ZBTB18	0.4468
1144	MA0698.1	2.52742e-10	0.197522	0.521	0.453	1.14239e-07	3	ZBTB18	0.201772
1145	MA0699.1	1.4764e-07	0.211263	0.549	0.479	6.67332e-05	4	LBX2	0.19678
1146	MA0699.1	5.40514e-11	-0.200725	0.415	0.5	2.44312e-08	3	LBX2	-0.268817
1147	MA0699.1	0.000265043	0.066372	0.52	0.482	0.1198	1	LBX2	0.109478
1148	MA0699.1	1.16083e-05	0.403501	0.58	0.486	0.00524696	7	LBX2	0.255097
1149	MA0700.1	2.2879e-07	-0.150664	0.449	0.506	0.000103413	2	LHX2	-0.172422
1150	MA0700.1	4.57313e-16	0.865951	0.725	0.492	2.06706e-13	7	LHX2	0.559323
1151	MA0700.1	1.36959e-16	0.334495	0.587	0.484	6.19056e-14	4	LHX2	0.278353
1152	MA0700.1	1.97594e-05	-0.272674	0.409	0.501	0.00893124	5	LHX2	-0.29271
1153	MA0700.1	0.0051372	-0.11561	0.475	0.507	1	0	LHX2	-0.0940582
1154	MA0701.1	1.94734e-09	0.518369	0.668	0.488	8.80197e-07	7	LHX9	0.452967
1155	MA0701.1	8.03587e-11	0.302067	0.568	0.481	3.63221e-08	4	LHX9	0.239854
1156	MA0701.1	0.00265312	-0.136043	0.46	0.498	1	2	LHX9	-0.114512
1157	MA0701.1	1.34692e-09	-0.197367	0.437	0.501	6.08807e-07	3	LHX9	-0.197177
1158	MA0701.1	0.000636092	-0.096455	0.467	0.503	0.287514	0	LHX9	-0.107136
1159	MA0701.1	0.000439956	0.00987098	0.522	0.486	0.19886	1	LHX9	0.103093
1160	MA0702.1	1.32183e-16	0.663074	0.731	0.485	5.97468e-14	7	LMX1A	0.591887
1161	MA0702.1	5.80846e-09	0.292554	0.557	0.481	2.62542e-06	4	LMX1A	0.21164
1162	MA0702.1	0.000530727	-0.116069	0.448	0.498	0.239889	2	LMX1A	-0.152647
1163	MA0703.1	0.00580498	-0.0542085	0.469	0.504	1	1	LMX1B	-0.103836
1164	MA0703.1	0.000273818	-0.20235	0.435	0.501	0.123766	5	LMX1B	-0.203795
1165	MA0703.1	4.17687e-08	0.520666	0.648	0.495	1.88795e-05	7	LMX1B	0.388565
1166	MA0703.1	5.12607e-06	0.161838	0.558	0.489	0.00231698	4	LMX1B	0.190431
1167	MA0706.1	1.5298e-05	0.462041	0.627	0.492	0.00691468	7	MEOX2	0.349807
1168	MA0706.1	5.49666e-08	0.215545	0.557	0.485	2.48449e-05	4	MEOX2	0.199693
1169	MA0707.1	0.000212962	-0.0898908	0.454	0.506	0.0962588	3	MNX1	-0.156445
1170	MA0707.1	0.000965556	-0.210668	0.411	0.502	0.436432	5	MNX1	-0.288549
1171	MA0707.1	2.22082e-13	0.286925	0.568	0.488	1.00381e-10	4	MNX1	0.21901
1172	MA0707.1	7.48988e-12	0.720292	0.679	0.494	3.38542e-09	7	MNX1	0.458901
1173	MA0708.1	0.000119908	0.0766912	0.536	0.481	0.0541985	1	MSX2	0.156196
1174	MA0708.1	1.31205e-11	-0.247487	0.413	0.502	5.93046e-09	3	MSX2	-0.281546
1175	MA0708.1	0.000390937	-0.103747	0.453	0.496	0.176703	2	MSX2	-0.130829
1176	MA0708.1	1.56106e-07	0.194753	0.549	0.481	7.05598e-05	4	MSX2	0.190769
1177	MA0708.1	6.11812e-08	0.43706	0.632	0.486	2.76539e-05	7	MSX2	0.378968
1178	MA0708.1	0.00152178	0.20422	0.549	0.487	0.687844	6	MSX2	0.172884
1179	MA0710.1	7.67052e-08	-0.201627	0.451	0.513	3.46708e-05	2	NOTO	-0.185831
1180	MA0710.1	1.23216e-06	-0.344069	0.419	0.507	0.000556934	5	NOTO	-0.275036
1181	MA0710.1	1.22728e-15	0.541103	0.767	0.498	5.54728e-13	7	NOTO	0.623081
1182	MA0710.1	1.56882e-14	0.280408	0.59	0.491	7.09106e-12	4	NOTO	0.264992
1183	MA0711.1	0.00138142	0.227936	0.58	0.478	0.624403	7	OTX1	0.279042
1184	MA0711.1	0.00320602	-0.15904	0.444	0.486	1	3	OTX1	-0.130397
1185	MA0712.1	1.28685e-06	0.0962011	0.519	0.474	0.000581656	2	OTX2	0.130847
1186	MA0712.1	1.60132e-05	-0.171433	0.442	0.488	0.00723795	1	OTX2	-0.142835
1187	MA0712.1	0.00322543	0.377203	0.532	0.479	1	6	OTX2	0.151401
1188	MA0712.1	2.37825e-18	-0.350024	0.387	0.496	1.07497e-15	3	OTX2	-0.358007
1189	MA0712.1	1.27338e-15	0.640834	0.63	0.474	5.75569e-13	5	OTX2	0.410465
1190	MA0713.1	3.11288e-09	0.223397	0.563	0.49	1.40702e-06	4	PHOX2A	0.200353
1191	MA0713.1	0.00890156	0.132306	0.566	0.497	1	6	PHOX2A	0.187556
1192	MA0713.1	0.000227821	-0.158475	0.466	0.505	0.102975	2	PHOX2A	-0.115953
1193	MA0713.1	1.28413e-06	-0.218759	0.444	0.508	0.000580429	3	PHOX2A	-0.194269
1194	MA0713.1	8.98614e-12	0.466809	0.668	0.496	4.06173e-09	7	PHOX2A	0.429508
1195	MA0714.1	3.08715e-07	0.13894	0.528	0.475	0.000139539	2	PITX3	0.15261
1196	MA0714.1	6.31164e-05	0.306719	0.574	0.479	0.0285286	6	PITX3	0.261025
1197	MA0714.1	7.14327e-21	-0.384549	0.389	0.498	3.22876e-18	3	PITX3	-0.356376
1198	MA0714.1	5.05969e-05	-0.143912	0.437	0.492	0.0228698	1	PITX3	-0.171025
1199	MA0714.1	6.89901e-19	0.747317	0.646	0.476	3.11835e-16	5	PITX3	0.440573
1200	MA0715.1	3.80989e-07	-0.16552	0.426	0.501	0.000172207	3	PROP1	-0.233957
1201	MA0715.1	0.00606017	0.189812	0.57	0.489	1	7	PROP1	0.221127
1202	MA0715.1	0.00413102	0.181918	0.535	0.489	1	6	PROP1	0.129704
1203	MA0715.1	0.00030293	0.0813548	0.54	0.484	0.136924	4	PROP1	0.157952
1204	MA0716.1	2.06563e-05	-0.1576	0.45	0.498	0.00933665	3	PRRX1	-0.146221
1205	MA0716.1	1.3683e-08	0.281325	0.562	0.481	6.18473e-06	4	PRRX1	0.224533
1206	MA0716.1	0.00476673	-0.084827	0.46	0.497	1	2	PRRX1	-0.111612
1207	MA0716.1	0.00608511	0.166222	0.541	0.49	1	6	PRRX1	0.142847
1208	MA0716.1	5.05194e-09	0.504409	0.689	0.487	2.28348e-06	7	PRRX1	0.500582
1209	MA0717.1	1.3683e-08	0.281325	0.562	0.481	6.18473e-06	4	RAX2	0.224533
1210	MA0717.1	0.00608511	0.166222	0.541	0.49	1	6	RAX2	0.142847
1211	MA0717.1	0.00476673	-0.084827	0.46	0.497	1	2	RAX2	-0.111612
1212	MA0717.1	2.06563e-05	-0.1576	0.45	0.498	0.00933665	3	RAX2	-0.146221
1213	MA0717.1	5.05194e-09	0.504409	0.689	0.487	2.28348e-06	7	RAX2	0.500582
1214	MA0718.1	7.44657e-05	-0.137955	0.472	0.504	0.0336585	0	RAX	-0.0946369
1215	MA0718.1	1.55126e-11	0.240897	0.563	0.484	7.01171e-09	4	RAX	0.218128
1216	MA0718.1	1.15112e-10	0.496925	0.684	0.49	5.20305e-08	7	RAX	0.481215
1217	MA0718.1	2.16284e-08	0.228731	0.551	0.483	9.77604e-06	1	RAX	0.190029
1218	MA0718.1	0.00084115	-0.145113	0.465	0.5	0.3802	2	RAX	-0.104697
1219	MA0718.1	4.12326e-10	-0.264359	0.425	0.505	1.86371e-07	3	RAX	-0.248821
1220	MA0719.1	0.00478588	-0.107904	0.455	0.487	1	1	RHOXF1	-0.0980552
1221	MA0719.1	0.00265561	-0.198065	0.445	0.487	1	4	RHOXF1	-0.130116
1222	MA0719.1	4.19091e-19	0.653456	0.667	0.473	1.89429e-16	5	RHOXF1	0.495847
1223	MA0719.1	2.06203e-10	0.186971	0.548	0.469	9.32037e-08	2	RHOXF1	0.224588
1224	MA0719.1	6.45074e-15	-0.286333	0.4	0.495	2.91573e-12	3	RHOXF1	-0.307429
1225	MA0721.1	5.80846e-09	0.292554	0.557	0.481	2.62542e-06	4	UNCX	0.21164
1226	MA0721.1	0.000530727	-0.116069	0.448	0.498	0.239889	2	UNCX	-0.152647
1227	MA0721.1	1.32183e-16	0.663074	0.731	0.485	5.97468e-14	7	UNCX	0.591887
1228	MA0722.1	1.27107e-07	0.210868	0.546	0.486	5.74525e-05	4	VAX1	0.167945
1229	MA0722.1	1.10276e-08	0.581201	0.658	0.49	4.98449e-06	7	VAX1	0.425306
1230	MA0723.1	1.10276e-08	0.581201	0.658	0.49	4.98449e-06	7	VAX2	0.425306
1231	MA0723.1	1.27107e-07	0.210868	0.546	0.486	5.74525e-05	4	VAX2	0.167945
1232	MA0724.1	0.00159935	0.190131	0.546	0.488	0.722905	6	VENTX	0.16202
1233	MA0724.1	0.000147036	0.496533	0.58	0.488	0.0664604	7	VENTX	0.249172
1234	MA0724.1	0.00313466	-0.138013	0.446	0.497	1	3	VENTX	-0.156202
1235	MA0724.1	0.00025497	-0.00515489	0.464	0.502	0.115247	0	VENTX	-0.113563
1236	MA0724.1	1.37011e-05	0.174635	0.541	0.483	0.00619291	4	VENTX	0.163605
1237	MA0725.1	0.000663048	-0.148488	0.432	0.494	0.299698	5	VSX1	-0.19348
1238	MA0725.1	1.92899e-05	0.146345	0.524	0.487	0.00871904	4	VSX1	0.105645
1239	MA0725.1	0.00128302	0.0509058	0.536	0.483	0.579927	1	VSX1	0.15021
1240	MA0725.1	1.60674e-07	0.349321	0.648	0.488	7.26246e-05	7	VSX1	0.409113
1241	MA0725.1	2.02896e-05	-0.154428	0.447	0.5	0.00917088	2	VSX1	-0.161653
1242	MA0726.1	1.60674e-07	0.349321	0.648	0.488	7.26246e-05	7	VSX2	0.409113
1243	MA0726.1	0.00128302	0.0509058	0.536	0.483	0.579927	1	VSX2	0.15021
1244	MA0726.1	2.02896e-05	-0.154428	0.447	0.5	0.00917088	2	VSX2	-0.161653
1245	MA0726.1	1.92899e-05	0.146345	0.524	0.487	0.00871904	4	VSX2	0.105645
1246	MA0726.1	0.000663048	-0.148488	0.432	0.494	0.299698	5	VSX2	-0.19348
1247	MA0727.1	0.000207576	-0.120983	0.476	0.505	0.0938241	0	NR3C2	-0.0853218
1248	MA0729.1	1.13188e-22	0.618563	0.664	0.469	5.11611e-20	5	RARA	0.501595
1249	MA0729.1	2.21388e-11	0.199432	0.551	0.463	1.00067e-08	2	RARA	0.25104
1250	MA0729.1	2.76395e-08	-0.516692	0.295	0.481	1.2493e-05	7	RARA	-0.705322
1251	MA0729.1	4.11674e-12	-0.26065	0.403	0.488	1.86077e-09	4	RARA	-0.276101
1252	MA0730.1	3.22275e-06	-0.134082	0.473	0.509	0.00145669	0	RARA(var.2)	-0.105825
1253	MA0730.1	6.4649e-05	-0.28308	0.429	0.5	0.0292214	6	RARA(var.2)	-0.22095
1254	MA0730.1	4.03392e-12	0.260575	0.554	0.487	1.82333e-09	1	RARA(var.2)	0.185964
1255	MA0730.1	0.00280158	-0.107089	0.475	0.502	1	2	RARA(var.2)	-0.0797599
1256	MA0730.1	1.43204e-08	0.1492	0.558	0.488	6.47283e-06	3	RARA(var.2)	0.193384
1257	MA0731.1	0.000616084	-0.0109511	0.456	0.506	0.27847	3	BCL6B	-0.150104
1258	MA0731.1	0.00430802	0.103094	0.526	0.495	1	4	BCL6B	0.0876343
1259	MA0731.1	2.36301e-09	0.509973	0.699	0.495	1.06808e-06	7	BCL6B	0.497864
1260	MA0732.1	1.46856e-24	0.292714	0.564	0.447	6.63788e-22	1	EGR3	0.33542
1261	MA0732.1	0.00245966	-0.119414	0.387	0.469	1	6	EGR3	-0.277254
1262	MA0732.1	3.59912e-40	0.876865	0.721	0.455	1.6268e-37	5	EGR3	0.664133
1263	MA0732.1	1.30297e-11	-0.302986	0.394	0.478	5.88942e-09	3	EGR3	-0.278815
1264	MA0732.1	9.4992e-21	-0.362441	0.37	0.48	4.29364e-18	4	EGR3	-0.375509
1265	MA0733.1	5.17144e-12	-0.261459	0.383	0.487	2.33749e-09	4	EGR4	-0.346577
1266	MA0733.1	5.5244e-18	0.237714	0.566	0.456	2.49703e-15	1	EGR4	0.311768
1267	MA0733.1	1.37225e-05	-0.168167	0.425	0.481	0.00620257	3	EGR4	-0.178574
1268	MA0733.1	6.96144e-33	0.704297	0.719	0.463	3.14657e-30	5	EGR4	0.63498
1269	MA0733.1	0.00245168	-0.0701732	0.401	0.477	1	6	EGR4	-0.250387
1270	MA0734.1	3.29467e-05	-0.122514	0.43	0.496	0.0148919	4	GLI2	-0.206003
1271	MA0734.1	2.86097e-10	0.197541	0.556	0.477	1.29316e-07	3	GLI2	0.221096
1272	MA0734.1	0.00851637	0.081119	0.517	0.482	1	1	GLI2	0.101131
1273	MA0734.1	1.32731e-11	-0.609979	0.29	0.492	5.99944e-09	7	GLI2	-0.762605
1274	MA0735.1	0.0049376	0.0423463	0.389	0.481	1	7	GLIS1	-0.306267
1275	MA0735.1	2.11379e-06	-0.138727	0.418	0.488	0.000955434	4	GLIS1	-0.223378
1276	MA0735.1	3.51584e-11	0.548449	0.63	0.473	1.58916e-08	5	GLIS1	0.413512
1277	MA0736.1	0.00707481	-0.0010088	0.496	0.469	1	0	GLIS2	0.0807522
1278	MA0736.1	7.96756e-07	0.158744	0.518	0.47	0.000360134	1	GLIS2	0.140291
1279	MA0736.1	4.52402e-09	0.434498	0.612	0.471	2.04486e-06	5	GLIS2	0.377805
1280	MA0736.1	9.04535e-14	-0.241787	0.41	0.487	4.0885e-11	4	GLIS2	-0.248298
1281	MA0736.1	6.83226e-07	-0.383784	0.311	0.481	0.000308818	7	GLIS2	-0.629122
1282	MA0737.1	0.000105233	-0.290499	0.387	0.49	0.0475655	6	GLIS3	-0.340448
1283	MA0737.1	1.40891e-08	-0.138008	0.417	0.497	6.36829e-06	4	GLIS3	-0.253198
1284	MA0737.1	1.98461e-06	0.141912	0.54	0.476	0.000897043	1	GLIS3	0.181998
1285	MA0737.1	1.20357e-05	-0.395135	0.332	0.49	0.00544016	7	GLIS3	-0.561599
1286	MA0737.1	4.13727e-05	0.250824	0.591	0.482	0.0187005	5	GLIS3	0.294125
1287	MA0738.1	0.00822191	-0.0814442	0.454	0.498	1	2	HIC2	-0.133453
1288	MA0738.1	8.90276e-07	0.199101	0.554	0.479	0.000402405	1	HIC2	0.20986
1289	MA0738.1	0.00162934	0.0152324	0.517	0.487	0.736461	3	HIC2	0.0862425
1290	MA0740.1	1.12239e-13	-0.500475	0.249	0.446	5.07322e-11	7	KLF14	-0.840898
1291	MA0740.1	2.17364e-51	0.289156	0.6	0.411	9.82486e-49	1	KLF14	0.545824
1292	MA0740.1	2.04343e-22	0.214579	0.538	0.424	9.23631e-20	2	KLF14	0.343542
1293	MA0740.1	3.7248e-80	1.71745	0.805	0.426	1.68361e-77	5	KLF14	0.918135
1294	MA0740.1	7.52062e-56	-0.840611	0.264	0.468	3.39932e-53	4	KLF14	-0.825971
1295	MA0740.1	4.53956e-90	-0.943956	0.22	0.477	2.05188e-87	3	KLF14	-1.11649
1296	MA0740.1	8.00077e-05	0.232803	0.529	0.438	0.0361635	6	KLF14	0.272337
1297	MA0741.1	8.16057e-71	-0.754356	0.243	0.477	3.68858e-68	3	KLF16	-0.973033
1298	MA0741.1	8.73338e-11	0.212572	0.506	0.433	3.94749e-08	2	KLF16	0.22477
1299	MA0741.1	2.14869e-13	-0.570409	0.275	0.448	9.7121e-11	7	KLF16	-0.704067
1300	MA0741.1	6.86558e-65	-0.769615	0.243	0.474	3.10324e-62	4	KLF16	-0.963931
1301	MA0741.1	2.36059e-60	1.11842	0.792	0.429	1.06698e-57	5	KLF16	0.884523
1302	MA0741.1	2.08235e-106	0.5984	0.677	0.4	9.41224e-104	1	KLF16	0.759156
1303	MA0743.1	9.48483e-05	-0.120704	0.401	0.493	0.0428714	5	SCRT1	-0.297985
1304	MA0743.1	2.89251e-05	0.12773	0.53	0.481	0.0130741	1	SCRT1	0.139955
1305	MA0743.1	9.94938e-06	-0.465381	0.373	0.492	0.00449712	7	SCRT1	-0.399483
1306	MA0743.1	5.75366e-09	-0.172732	0.37	0.494	2.60066e-06	6	SCRT1	-0.416986
1307	MA0743.1	5.19877e-05	-0.149676	0.441	0.496	0.0234984	4	SCRT1	-0.169561
1308	MA0743.1	0.000587651	0.0927395	0.526	0.483	0.265618	3	SCRT1	0.12304
1309	MA0744.1	0.00171159	0.110183	0.52	0.485	0.773639	1	SCRT2	0.100527
1310	MA0744.1	3.64114e-05	-0.0842836	0.445	0.497	0.0164579	4	SCRT2	-0.159441
1311	MA0744.1	1.01942e-09	-0.35464	0.359	0.496	4.6078e-07	6	SCRT2	-0.466356
1312	MA0745.1	2.61583e-22	-1.08951	0.326	0.47	1.18235e-19	4	SNAI2	-0.527789
1313	MA0745.1	1.50346e-15	0.734059	0.536	0.436	6.79562e-13	2	SNAI2	0.297905
1314	MA0745.1	5.62745e-05	-0.314946	0.475	0.441	0.0254361	0	SNAI2	0.107149
1315	MA0745.1	1.62047e-22	-1.60877	0.197	0.457	7.32452e-20	7	SNAI2	-1.214
1316	MA0745.1	1.03116e-15	0.34323	0.536	0.436	4.66082e-13	1	SNAI2	0.297905
1317	MA0745.1	1.86739e-40	-0.915334	0.207	0.462	8.44061e-38	6	SNAI2	-1.15826
1318	MA0745.1	5.5149e-05	0.597382	0.365	0.456	0.0249273	5	SNAI2	-0.321137
1319	MA0746.1	1.0724e-12	0.192518	0.503	0.433	4.84727e-10	2	SP3	0.216191
1320	MA0746.1	2.80703e-64	-0.745415	0.25	0.472	1.26878e-61	4	SP3	-0.916859
1321	MA0746.1	5.82691e-55	-0.656853	0.276	0.47	2.63376e-52	3	SP3	-0.767992
1322	MA0746.1	8.53614e-79	1.3429	0.82	0.427	3.85834e-76	5	SP3	0.941388
1323	MA0746.1	1.31293e-10	-0.546254	0.285	0.447	5.93446e-08	7	SP3	-0.649313
1324	MA0746.1	0.000117797	-0.365629	0.417	0.455	0.0532442	0	SP3	-0.125819
1325	MA0746.1	0.00278556	0.224397	0.518	0.44	1	6	SP3	0.235449
1326	MA0746.1	2.81927e-76	0.425716	0.637	0.406	1.27431e-73	1	SP3	0.649814
1327	MA0747.1	8.67603e-55	-0.701519	0.286	0.47	3.92157e-52	3	SP8	-0.716646
1328	MA0747.1	2.58323e-74	0.559453	0.628	0.409	1.16762e-71	1	SP8	0.618664
1329	MA0747.1	4.21182e-12	-0.472639	0.264	0.449	1.90374e-09	7	SP8	-0.766178
1330	MA0747.1	1.37835e-61	-0.733739	0.261	0.472	6.23015e-59	4	SP8	-0.854737
1331	MA0747.1	5.43776e-16	0.196308	0.522	0.431	2.45787e-13	2	SP8	0.276362
1332	MA0747.1	5.24714e-61	1.03377	0.784	0.43	2.37171e-58	5	SP8	0.866517
1333	MA0748.1	3.5491e-45	1.1564	0.732	0.458	1.60419e-42	5	YY2	0.676496
1334	MA0748.1	7.12648e-24	-0.445256	0.36	0.487	3.22117e-21	3	YY2	-0.435925
1335	MA0748.1	0.000259862	-0.0278563	0.49	0.46	0.117458	0	YY2	0.0911479
1336	MA0749.1	0.00113721	-0.0713767	0.441	0.487	0.51402	3	ZBED1	-0.143143
1337	MA0749.1	0.000528359	0.203009	0.555	0.477	0.238818	5	ZBED1	0.218499
1338	MA0750.2	1.05754e-69	-0.709534	0.361	0.528	4.78009e-67	0	ZBTB7A	-0.548539
1339	MA0750.2	1.38004e-33	-0.655142	0.34	0.496	6.23778e-31	4	ZBTB7A	-0.544805
1340	MA0750.2	6.85088e-33	1.16963	0.716	0.465	3.0966e-30	5	ZBTB7A	0.622729
1341	MA0750.2	1.43117e-52	0.680493	0.625	0.447	6.46888e-50	1	ZBTB7A	0.483581
1342	MA0750.2	1.8186e-05	0.039748	0.588	0.471	0.00822006	6	ZBTB7A	0.320089
1343	MA0750.2	3.16149e-26	0.138121	0.592	0.455	1.429e-23	2	ZBTB7A	0.379731
1344	MA0750.2	1.94998e-15	-0.690597	0.233	0.481	8.81392e-13	7	ZBTB7A	-1.04571
1345	MA0751.1	2.51463e-05	0.223682	0.562	0.487	0.0113661	5	ZIC4	0.206648
1346	MA0751.1	6.34411e-06	-0.176676	0.441	0.498	0.00286754	3	ZIC4	-0.175367
1347	MA0751.1	1.00942e-19	-0.254483	0.404	0.507	4.56258e-17	1	ZIC4	-0.32763
1348	MA0751.1	3.14411e-09	0.125191	0.526	0.473	1.42114e-06	0	ZIC4	0.153223
1349	MA0751.1	4.25251e-07	0.138359	0.543	0.48	0.000192213	2	ZIC4	0.177918
1350	MA0752.1	1.37392e-05	-0.359711	0.368	0.482	0.00621013	7	ZNF410	-0.389327
1351	MA0752.1	4.44845e-06	-0.191103	0.432	0.486	0.0020107	4	ZNF410	-0.169925
1352	MA0752.1	0.00947426	0.130805	0.536	0.477	1	5	ZNF410	0.168244
1353	MA0752.1	0.000628929	0.126829	0.509	0.474	0.284276	2	ZNF410	0.102779
1354	MA0753.1	2.25345e-05	-0.445104	0.358	0.466	0.0101856	7	ZNF740	-0.38037
1355	MA0753.1	2.47153e-70	0.657497	0.637	0.431	1.11713e-67	1	ZNF740	0.563606
1356	MA0753.1	1.76463e-31	-0.554399	0.335	0.483	7.97613e-29	4	ZNF740	-0.527862
1357	MA0753.1	1.28439e-09	-0.324186	0.387	0.477	5.80546e-07	3	ZNF740	-0.301656
1358	MA0753.1	6.24994e-26	-0.610938	0.238	0.473	2.82497e-23	6	ZNF740	-0.990879
1359	MA0753.1	1.6269e-10	0.3215	0.612	0.457	7.35359e-08	5	ZNF740	0.421337
1360	MA0754.1	5.34463e-05	0.21449	0.565	0.471	0.0241577	5	CUX1	0.262524
1361	MA0754.1	0.00440299	-0.135321	0.456	0.483	1	0	CUX1	-0.0829894
1362	MA0754.1	6.60654e-09	0.55983	0.637	0.471	2.98615e-06	7	CUX1	0.435566
1363	MA0755.1	2.53775e-08	0.499327	0.591	0.468	1.14706e-05	5	CUX2	0.33665
1364	MA0755.1	0.00985156	-0.17347	0.453	0.477	1	3	CUX2	-0.0744782
1365	MA0755.1	0.00070404	-0.160421	0.452	0.484	0.318226	0	CUX2	-0.0986843
1366	MA0755.1	5.63055e-10	0.456806	0.622	0.47	2.54501e-07	7	CUX2	0.404254
1367	MA0756.1	1.68248e-12	-0.223179	0.402	0.494	7.60479e-10	3	ONECUT2	-0.297316
1368	MA0756.1	2.97969e-06	0.359028	0.56	0.478	0.00134682	5	ONECUT2	0.228416
1369	MA0756.1	1.00308e-06	0.701742	0.622	0.478	0.00045339	7	ONECUT2	0.379904
1370	MA0757.1	2.8763e-06	-0.174202	0.44	0.49	0.00130009	1	ONECUT3	-0.155278
1371	MA0757.1	0.00253997	-0.0159516	0.501	0.474	1	0	ONECUT3	0.0799235
1372	MA0757.1	2.02756e-18	-0.387879	0.391	0.497	9.16458e-16	3	ONECUT3	-0.346077
1373	MA0757.1	6.11711e-07	0.15579	0.532	0.473	0.000276493	2	ONECUT3	0.169586
1374	MA0757.1	8.56426e-12	0.469208	0.628	0.476	3.87105e-09	5	ONECUT3	0.399803
1375	MA0758.1	8.43904e-14	0.208777	0.549	0.461	3.81445e-11	2	E2F7	0.252039
1376	MA0758.1	0.00315663	-0.139673	0.455	0.478	1	4	E2F7	-0.0711441
1377	MA0758.1	4.61791e-07	0.152365	0.523	0.465	0.000208729	1	E2F7	0.16958
1378	MA0758.1	2.58641e-09	0.507273	0.573	0.47	1.16906e-06	5	E2F7	0.285874
1379	MA0758.1	5.94185e-36	-0.392041	0.34	0.496	2.68572e-33	3	E2F7	-0.544805
1380	MA0759.1	5.55144e-60	-0.870311	0.276	0.484	2.50925e-57	4	ELK3	-0.810339
1381	MA0759.1	3.76953e-48	0.234431	0.614	0.428	1.70383e-45	2	ELK3	0.520628
1382	MA0759.1	4.03779e-64	1.48192	0.805	0.441	1.82508e-61	5	ELK3	0.86821
1383	MA0759.1	5.91889e-27	-0.686674	0.38	0.492	2.67534e-24	0	ELK3	-0.372659
1384	MA0759.1	1.66358e-14	0.599348	0.522	0.444	7.5194e-12	1	ELK3	0.23349
1385	MA0759.1	2.27915e-29	-1.26321	0.176	0.463	1.03018e-26	7	ELK3	-1.39544
1386	MA0759.1	1.85486e-06	0.062779	0.566	0.452	0.000838396	6	ELK3	0.324479
1387	MA0760.1	4.56723e-27	0.902322	0.701	0.462	2.06439e-24	5	ERF	0.601522
1388	MA0760.1	1.126e-14	-0.0988862	0.562	0.458	5.08952e-12	3	ERF	0.295223
1389	MA0760.1	8.58089e-17	-1.02126	0.238	0.477	3.87856e-14	7	ERF	-1.00303
1390	MA0760.1	1.84008e-46	-0.69718	0.302	0.497	8.31715e-44	4	ERF	-0.718697
1391	MA0760.1	1.62165e-41	0.884693	0.6	0.448	7.32985e-39	1	ERF	0.421464
1392	MA0760.1	3.84755e-30	0.112362	0.595	0.45	1.73909e-27	2	ERF	0.402965
1393	MA0760.1	1.1921e-71	-0.783996	0.355	0.526	5.38828e-69	0	ERF	-0.567244
1394	MA0761.1	2.11031e-40	-0.71432	0.302	0.489	9.53862e-38	4	ETV1	-0.695286
1395	MA0761.1	1.75579e-06	0.099411	0.583	0.46	0.000793619	6	ETV1	0.341862
1396	MA0761.1	0.00114438	-0.460476	0.429	0.47	0.51726	3	ETV1	-0.131683
1397	MA0761.1	3.40688e-32	0.242724	0.594	0.441	1.53991e-29	2	ETV1	0.429684
1398	MA0761.1	4.2024e-09	0.360649	0.521	0.454	1.89949e-06	1	ETV1	0.198591
1399	MA0761.1	3.93519e-19	-0.985015	0.192	0.471	1.7787e-16	7	ETV1	-1.29462
1400	MA0761.1	3.98712e-56	1.54153	0.766	0.451	1.80218e-53	5	ETV1	0.764217
1401	MA0761.1	1.37165e-15	-0.538686	0.416	0.487	6.19988e-13	0	ETV1	-0.227338
1402	MA0762.1	1.11673e-07	-0.614531	0.337	0.484	5.04761e-05	7	ETV2	-0.522258
1403	MA0762.1	7.88562e-21	0.0306884	0.576	0.464	3.5643e-18	2	ETV2	0.311944
1404	MA0762.1	0.00109979	0.336019	0.56	0.478	0.497106	5	ETV2	0.228416
1405	MA0762.1	2.36026e-63	1.00691	0.635	0.452	1.06684e-60	1	ETV2	0.490434
1406	MA0762.1	1.88988e-90	-0.847737	0.35	0.541	8.54226e-88	0	ETV2	-0.628274
1407	MA0762.1	2.41636e-31	0.122679	0.613	0.46	1.09219e-28	3	ETV2	0.414253
1408	MA0762.1	1.32994e-28	-0.530615	0.354	0.5	6.01133e-26	4	ETV2	-0.498179
1409	MA0763.1	4.55653e-11	0.472973	0.526	0.446	2.05955e-08	1	ETV3	0.238019
1410	MA0763.1	5.27377e-59	1.60551	0.758	0.446	2.38374e-56	5	ETV3	0.765154
1411	MA0763.1	8.9563e-50	-0.814937	0.301	0.482	4.04825e-47	4	ETV3	-0.67927
1412	MA0763.1	2.16065e-21	-0.60736	0.394	0.489	9.76612e-19	0	ETV3	-0.311639
1413	MA0763.1	1.49775e-27	-1.22617	0.155	0.466	6.76984e-25	7	ETV3	-1.58806
1414	MA0763.1	0.000289867	0.0413591	0.541	0.456	0.13102	6	ETV3	0.246595
1415	MA0763.1	5.65727e-34	0.131675	0.583	0.436	2.55709e-31	2	ETV3	0.419168
1416	MA0764.1	3.16608e-19	-0.541172	0.408	0.489	1.43107e-16	0	ETV4	-0.261265
1417	MA0764.1	8.79719e-56	1.56676	0.768	0.45	3.97633e-53	5	ETV4	0.771181
1418	MA0764.1	6.47402e-18	-0.954783	0.202	0.47	2.92626e-15	7	ETV4	-1.21831
1419	MA0764.1	1.07043e-05	0.0751863	0.56	0.46	0.00483832	6	ETV4	0.283793
1420	MA0764.1	6.92403e-33	-0.66804	0.32	0.485	3.12966e-30	4	ETV4	-0.599913
1421	MA0764.1	6.55024e-32	0.182903	0.585	0.442	2.96071e-29	2	ETV4	0.40439
1422	MA0764.1	1.6003e-08	0.395023	0.52	0.453	7.23337e-06	1	ETV4	0.199001
1423	MA0764.1	0.00429755	-0.488134	0.441	0.468	1	3	ETV4	-0.0857299
1424	MA0765.1	1.46093e-36	-0.744221	0.297	0.479	6.60339e-34	4	ETV5	-0.689563
1425	MA0765.1	1.45169e-58	1.60053	0.763	0.442	6.56163e-56	5	ETV5	0.787637
1426	MA0765.1	4.90972e-05	0.247145	0.521	0.453	0.0221919	6	ETV5	0.201772
1427	MA0765.1	1.12004e-10	-0.478422	0.42	0.472	5.0626e-08	0	ETV5	-0.168398
1428	MA0765.1	8.04986e-06	0.226382	0.496	0.448	0.00363854	1	ETV5	0.146841
1429	MA0765.1	0.000258911	-0.470783	0.423	0.461	0.117028	3	ETV5	-0.124109
1430	MA0765.1	5.97039e-20	-0.82689	0.212	0.461	2.69862e-17	7	ETV5	-1.1207
1431	MA0765.1	1.16543e-29	0.228719	0.576	0.433	5.26775e-27	2	ETV5	0.411702
1432	MA0766.1	2.23768e-54	-5.54651	0.366	0.546	1.01143e-51	2	GATA5	-0.577057
1433	MA0766.1	9.37409e-92	-5.98839	0.376	0.583	4.23709e-89	0	GATA5	-0.632763
1434	MA0766.1	5.45077e-19	-1.18119	0.595	0.503	2.46375e-16	1	GATA5	0.242331
1435	MA0766.1	4.76835e-112	-4.49074	0.831	0.472	2.15529e-109	4	GATA5	0.816062
1436	MA0766.1	6.32022e-49	-2.97618	0.237	0.531	2.85674e-46	5	GATA5	-1.16382
1437	MA0766.1	3.4068e-165	5.85101	0.98	0.499	1.53988e-162	6	GATA5	0.973742
1438	MA0766.1	5.50438e-50	-2.45191	0.948	0.509	2.48798e-47	7	GATA5	0.897221
1439	MA0767.1	0.00188316	0.14649	0.506	0.476	0.85119	0	GCM2	0.0881758
1440	MA0768.1	0.000265101	-0.366959	0.352	0.486	0.119825	7	LEF1	-0.465381
1441	MA0768.1	2.30447e-13	0.0971557	0.56	0.468	1.04162e-10	1	LEF1	0.258918
1442	MA0768.1	2.08329e-06	-0.272472	0.418	0.493	0.000941647	4	LEF1	-0.238085
1443	MA0768.1	5.24781e-05	-0.281757	0.434	0.491	0.0237201	3	LEF1	-0.178028
1444	MA0768.1	0.000259352	1.20989	0.557	0.48	0.117227	5	LEF1	0.214643
1445	MA0770.1	5.42717e-08	-0.158076	0.429	0.494	2.45308e-05	3	HSF2	-0.203533
1446	MA0770.1	0.000212759	0.205735	0.534	0.483	0.0961672	5	HSF2	0.144817
1447	MA0770.1	4.40588e-09	0.241091	0.547	0.473	1.99146e-06	1	HSF2	0.209701
1448	MA0771.1	5.29521e-05	0.139758	0.57	0.484	0.0239344	5	HSF4	0.235955
1449	MA0771.1	6.59254e-11	-0.20165	0.413	0.5	2.97983e-08	3	HSF4	-0.275786
1450	MA0771.1	4.47455e-11	0.286565	0.551	0.476	2.02249e-08	1	HSF4	0.211091
1451	MA0772.1	6.81395e-31	1.26946	0.777	0.452	3.0799e-28	7	IRF7	0.781592
1452	MA0772.1	5.60229e-10	-0.872891	0.532	0.448	2.53223e-07	4	IRF7	0.247928
1453	MA0772.1	5.31228e-86	-1.98544	0.244	0.493	2.40115e-83	3	IRF7	-1.01471
1454	MA0772.1	3.25972e-19	3.45076	0.633	0.451	1.47339e-16	5	IRF7	0.489078
1455	MA0772.1	1.28612e-28	-0.814023	0.578	0.436	5.81327e-26	1	IRF7	0.406741
1456	MA0772.1	6.81866e-18	-1.75869	0.3	0.465	3.08204e-15	6	IRF7	-0.632268
1457	MA0773.1	1.91693e-15	-0.477888	0.395	0.475	8.66453e-13	0	MEF2D	-0.266075
1458	MA0773.1	1.92589e-56	0.692618	0.601	0.421	8.70502e-54	1	MEF2D	0.513545
1459	MA0773.1	0.000590559	0.264694	0.549	0.448	0.266933	7	MEF2D	0.293307
1460	MA0773.1	8.78235e-08	-0.333519	0.381	0.46	3.96962e-05	4	MEF2D	-0.271843
1461	MA0773.1	2.23475e-05	-0.584019	0.375	0.453	0.0101011	6	MEF2D	-0.27262
1462	MA0774.1	8.02289e-34	-0.546947	0.35	0.51	3.62635e-31	4	MEIS2	-0.543142
1463	MA0774.1	9.64952e-40	-1.3019	0.13	0.497	4.36158e-37	7	MEIS2	-1.93473
1464	MA0774.1	0.000375218	-0.224734	0.404	0.493	0.169599	5	MEIS2	-0.287232
1465	MA0774.1	0.00123159	0.0308684	0.517	0.485	0.556678	3	MEIS2	0.0921795
1466	MA0774.1	0.000838151	-0.200505	0.463	0.494	0.378844	2	MEIS2	-0.0934988
1467	MA0774.1	3.62557e-45	0.609253	0.634	0.462	1.63876e-42	1	MEIS2	0.45659
1468	MA0774.1	3.3765e-05	-0.00798369	0.515	0.478	0.0152618	0	MEIS2	0.107562
1469	MA0775.1	2.92385e-27	-0.990053	0.192	0.494	1.32158e-24	7	MEIS3	-1.3634
1470	MA0775.1	1.0437e-46	0.569124	0.623	0.462	4.71751e-44	1	MEIS3	0.431339
1471	MA0775.1	0.00180149	-0.221127	0.411	0.491	0.814272	5	MEIS3	-0.256585
1472	MA0775.1	0.00861326	0.0222587	0.504	0.48	1	0	MEIS3	0.0703893
1473	MA0775.1	0.000864982	-0.180473	0.452	0.494	0.390972	2	MEIS3	-0.128188
1474	MA0775.1	2.62837e-25	-0.480712	0.378	0.504	1.18802e-22	4	MEIS3	-0.415037
1475	MA0776.1	0.000346621	-0.171748	0.449	0.497	0.156673	3	MYBL1	-0.14653
1476	MA0776.1	1.14967e-05	0.146377	0.531	0.482	0.00519653	1	MYBL1	0.139679
1477	MA0776.1	1.0729e-05	0.252611	0.591	0.486	0.00484952	6	MYBL1	0.282202
1478	MA0777.1	0.00251144	-0.152876	0.458	0.491	1	3	MYBL2	-0.100375
1479	MA0777.1	0.00640909	0.256038	0.531	0.484	1	5	MYBL2	0.133705
1480	MA0778.1	2.1878e-08	-0.415386	0.415	0.469	9.88885e-06	2	NFKB2	-0.176477
1481	MA0778.1	5.63486e-05	-1.05251	0.4	0.469	0.0254696	4	NFKB2	-0.229588
1482	MA0778.1	0.0012257	-1.11157	0.363	0.463	0.554018	7	NFKB2	-0.351043
1483	MA0778.1	2.45306e-18	0.303447	0.55	0.446	1.10878e-15	3	NFKB2	0.302388
1484	MA0778.1	4.88696e-07	0.153973	0.431	0.474	0.000220891	0	NFKB2	-0.137199
1485	MA0778.1	1.72757e-16	0.282725	0.546	0.444	7.80861e-14	1	NFKB2	0.298341
1486	MA0780.1	7.04409e-06	0.467072	0.617	0.482	0.00318393	7	PAX3	0.356237
1487	MA0780.1	9.74825e-05	0.228005	0.518	0.48	0.0440621	4	PAX3	0.109918
1488	MA0780.1	0.00230456	-0.0912697	0.455	0.49	1	1	PAX3	-0.106915
1489	MA0782.1	4.73331e-19	0.225822	0.564	0.458	2.13946e-16	3	PKNOX1	0.300348
1490	MA0782.1	2.75479e-06	-0.192668	0.504	0.458	0.00124516	0	PKNOX1	0.138076
1491	MA0782.1	3.24143e-07	-0.494454	0.373	0.476	0.000146513	6	PKNOX1	-0.351786
1492	MA0782.1	1.30417e-55	-1.70825	0.057	0.481	5.89484e-53	7	PKNOX1	-3.077
1493	MA0782.1	0.000200658	-0.308517	0.388	0.476	0.0906972	5	PKNOX1	-0.294905
1494	MA0782.1	7.35783e-33	0.276487	0.598	0.448	3.32574e-30	1	PKNOX1	0.416647
1495	MA0782.1	1.24564e-69	-0.979084	0.262	0.503	5.63028e-67	4	PKNOX1	-0.940992
1496	MA0783.1	1.4476e-08	-0.182696	0.373	0.48	6.54317e-06	6	PKNOX2	-0.363859
1497	MA0783.1	1.67829e-57	-1.75597	0.073	0.484	7.58586e-55	7	PKNOX2	-2.72904
1498	MA0783.1	4.1872e-09	-0.424285	0.359	0.481	1.89261e-06	5	PKNOX2	-0.422053
1499	MA0783.1	4.6743e-66	-0.841032	0.265	0.507	2.11278e-63	4	PKNOX2	-0.935993
1500	MA0783.1	1.15608e-27	0.29511	0.589	0.454	5.22548e-25	1	PKNOX2	0.375575
1501	MA0783.1	0.000533984	-0.0637253	0.499	0.465	0.241361	0	PKNOX2	0.101809
1502	MA0783.1	6.63586e-32	0.499466	0.594	0.457	2.99941e-29	3	PKNOX2	0.378269
1503	MA0784.1	0.00297294	-0.225054	0.46	0.49	1	0	POU1F1	-0.0911479
1504	MA0784.1	0.00399078	-0.092254	0.518	0.473	1	1	POU1F1	0.131112
1505	MA0784.1	2.80248e-07	-0.318764	0.436	0.488	0.000126672	3	POU1F1	-0.162553
1506	MA0784.1	2.43634e-05	0.133947	0.606	0.478	0.0110123	7	POU1F1	0.342307
1507	MA0784.1	0.00916698	1.47324	0.505	0.479	1	5	POU1F1	0.0762577
1508	MA0785.1	1.59748e-06	-0.290787	0.453	0.497	0.000722061	0	POU2F1	-0.133735
1509	MA0785.1	1.42967e-08	-0.373898	0.434	0.491	6.46212e-06	3	POU2F1	-0.178028
1510	MA0785.1	2.50247e-08	0.267754	0.663	0.479	1.13112e-05	7	POU2F1	0.468983
1511	MA0785.1	0.000104894	1.48828	0.549	0.48	0.0474121	5	POU2F1	0.193772
1512	MA0786.1	0.000754002	-0.221772	0.452	0.491	0.340809	0	POU3F1	-0.1194
1513	MA0786.1	0.00231618	-0.0359021	0.509	0.474	1	2	POU3F1	0.102779
1514	MA0786.1	0.00145643	0.153825	0.585	0.477	0.658307	7	POU3F1	0.294447
1515	MA0786.1	5.20004e-06	-0.285994	0.429	0.487	0.00235042	3	POU3F1	-0.182944
1516	MA0786.1	2.37196e-09	1.32637	0.581	0.475	1.07213e-06	5	POU3F1	0.290611
1517	MA0787.1	2.15814e-05	1.52846	0.565	0.482	0.00975479	5	POU3F2	0.229218
1518	MA0787.1	1.33567e-05	0.196582	0.632	0.483	0.00603725	7	POU3F2	0.387901
1519	MA0787.1	0.00173854	-0.044696	0.516	0.48	0.78582	1	POU3F2	0.104337
1520	MA0787.1	5.31059e-06	-0.328386	0.442	0.493	0.00240039	3	POU3F2	-0.157541
1521	MA0787.1	0.000257914	-0.291007	0.458	0.499	0.116577	0	POU3F2	-0.123692
1522	MA0788.1	0.00302949	-0.138632	0.461	0.494	1	0	POU3F3	-0.0997443
1523	MA0788.1	1.38706e-08	0.293617	0.648	0.48	6.26952e-06	7	POU3F3	0.432959
1524	MA0788.1	8.78102e-09	-0.326324	0.429	0.492	3.96902e-06	3	POU3F3	-0.197681
1525	MA0788.1	0.00191039	0.0486836	0.51	0.478	0.863495	1	POU3F3	0.0934866
1526	MA0788.1	1.24791e-06	0.905089	0.589	0.479	0.000564057	5	POU3F3	0.298242
1527	MA0789.1	0.000117781	-0.0291662	0.522	0.478	0.0532372	1	POU3F4	0.127039
1528	MA0789.1	0.00337973	-0.307321	0.466	0.494	1	0	POU3F4	-0.0841811
1529	MA0789.1	0.000608848	0.0953049	0.606	0.482	0.275199	7	POU3F4	0.330285
1530	MA0789.1	2.68263e-05	-0.366109	0.444	0.491	0.0121255	3	POU3F4	-0.145163
1531	MA0789.1	3.30138e-06	1.64786	0.583	0.48	0.00149222	5	POU3F4	0.280461
1532	MA0790.1	0.000392362	0.121005	0.557	0.496	0.177348	6	POU4F1	0.167337
1533	MA0790.1	2.74075e-11	0.502552	0.694	0.494	1.23882e-08	7	POU4F1	0.490425
1534	MA0790.1	0.00137312	-0.148967	0.417	0.502	0.620649	5	POU4F1	-0.26764
1535	MA0790.1	2.13855e-11	0.214915	0.589	0.485	9.66625e-09	4	POU4F1	0.280283
1536	MA0790.1	2.41747e-06	-0.212978	0.434	0.508	0.0010927	3	POU4F1	-0.227133
1537	MA0791.1	1.85896e-11	0.223863	0.58	0.495	8.40251e-09	4	POU4F3	0.228624
1538	MA0791.1	0.00179044	-0.153999	0.465	0.513	0.80928	3	POU4F3	-0.141728
1539	MA0791.1	0.000578956	-0.146415	0.419	0.51	0.261688	5	POU4F3	-0.283547
1540	MA0791.1	0.00323316	-0.0945091	0.489	0.513	1	0	POU4F3	-0.0691244
1541	MA0791.1	9.00096e-15	0.622376	0.725	0.501	4.06843e-12	7	POU4F3	0.53317
1542	MA0791.1	1.42203e-05	0.170958	0.597	0.502	0.00642757	6	POU4F3	0.250044
1543	MA0792.1	9.25713e-05	-0.497245	0.462	0.497	0.0418422	0	POU5F1B	-0.105353
1544	MA0792.1	0.00734939	-0.185421	0.575	0.484	1	7	POU5F1B	0.248555
1545	MA0792.1	8.75378e-05	2.16201	0.555	0.483	0.0395671	5	POU5F1B	0.200465
1546	MA0792.1	2.41869e-07	-0.478893	0.434	0.495	0.000109325	3	POU5F1B	-0.189733
1547	MA0792.1	3.47575e-07	-0.234974	0.541	0.476	0.000157104	1	POU5F1B	0.184667
1548	MA0793.1	1.74836e-05	-0.247	0.43	0.506	0.00790259	5	POU6F2	-0.234801
1549	MA0793.1	0.000224654	-0.013285	0.463	0.51	0.101543	2	POU6F2	-0.139485
1550	MA0793.1	0.00343812	-0.0914942	0.483	0.512	1	0	POU6F2	-0.0841206
1551	MA0793.1	1.07945e-07	0.219786	0.571	0.493	4.8791e-05	4	POU6F2	0.211903
1552	MA0793.1	7.48225e-08	0.331313	0.679	0.499	3.38198e-05	7	POU6F2	0.444372
1553	MA0795.1	0.000126294	0.214091	0.531	0.484	0.0570847	4	SMAD3	0.133705
1554	MA0795.1	2.99855e-14	0.37427	0.571	0.477	1.35534e-11	3	SMAD3	0.259501
1555	MA0795.1	4.93059e-17	0.712106	0.664	0.483	2.22863e-14	6	SMAD3	0.45916
1556	MA0795.1	4.77129e-06	-0.258371	0.447	0.498	0.00215662	2	SMAD3	-0.155871
1557	MA0795.1	1.00868e-15	-0.419492	0.438	0.514	4.55925e-13	0	SMAD3	-0.230837
1558	MA0796.1	5.72537e-65	-0.801562	0.27	0.504	2.58787e-62	4	TGIF1	-0.900464
1559	MA0796.1	2.09458e-22	0.243163	0.572	0.455	9.4675e-20	1	TGIF1	0.330149
1560	MA0796.1	1.37674e-52	-1.53311	0.078	0.483	6.22285e-50	7	TGIF1	-2.63048
1561	MA0796.1	4.30045e-20	0.373254	0.573	0.458	1.9438e-17	3	TGIF1	0.323188
1562	MA0796.1	3.16279e-05	0.0238672	0.502	0.461	0.0142958	0	TGIF1	0.122921
1563	MA0796.1	1.22762e-07	-0.23373	0.35	0.479	5.54882e-05	6	TGIF1	-0.452671
1564	MA0797.1	5.90639e-54	-1.5928	0.078	0.485	2.66969e-51	7	TGIF2	-2.63644
1565	MA0797.1	3.86955e-62	-0.748502	0.275	0.506	1.74904e-59	4	TGIF2	-0.879706
1566	MA0797.1	4.25442e-20	0.323037	0.561	0.463	1.923e-17	3	TGIF2	0.276989
1567	MA0797.1	0.00901694	-0.0891301	0.491	0.469	1	0	TGIF2	0.0661351
1568	MA0797.1	0.000220538	-0.304641	0.406	0.479	0.0996833	5	TGIF2	-0.238546
1569	MA0797.1	1.48913e-36	0.38379	0.605	0.451	6.73088e-34	1	TGIF2	0.423808
1570	MA0797.1	8.13491e-07	-0.276001	0.384	0.48	0.000367698	6	TGIF2	-0.321928
1571	MA0798.1	1.70761e-15	-0.350668	0.42	0.524	7.71839e-13	3	RFX3	-0.319177
1572	MA0798.1	1.19795e-11	0.0819629	0.553	0.49	5.41472e-09	0	RFX3	0.174498
1573	MA0798.1	1.469e-58	-0.455163	0.359	0.538	6.63988e-56	1	RFX3	-0.583622
1574	MA0798.1	0.000517565	-0.201693	0.424	0.513	0.233939	5	RFX3	-0.274895
1575	MA0798.1	6.93169e-18	0.999352	0.762	0.504	3.13313e-15	7	RFX3	0.596367
1576	MA0798.1	4.96423e-18	0.213861	0.603	0.492	2.24383e-15	2	RFX3	0.2935
1577	MA0798.1	1.17782e-10	0.141766	0.576	0.5	5.32373e-08	4	RFX3	0.204141
1578	MA0799.1	0.00142572	-0.176674	0.438	0.514	0.644425	5	RFX4	-0.230837
1579	MA0799.1	2.40735e-09	0.0139039	0.544	0.496	1.08812e-06	0	RFX4	0.133267
1580	MA0799.1	5.74424e-19	0.248348	0.608	0.493	2.5964e-16	2	RFX4	0.302484
1581	MA0799.1	3.64056e-51	-0.390147	0.373	0.538	1.64553e-48	1	RFX4	-0.528431
1582	MA0799.1	1.11675e-15	-0.348431	0.411	0.527	5.04771e-13	3	RFX4	-0.358665
1583	MA0799.1	5.93079e-15	1.1116	0.731	0.506	2.68072e-12	7	RFX4	0.530734
1584	MA0799.1	1.53211e-09	0.0893737	0.595	0.499	6.92514e-07	4	RFX4	0.25385
1585	MA0800.1	0.00198873	-0.181529	0.525	0.486	0.898904	1	EOMES	0.111361
1586	MA0800.1	0.00236203	-0.329315	0.443	0.495	1	6	EOMES	-0.160122
1587	MA0800.1	0.00607475	0.0396305	0.513	0.489	1	3	EOMES	0.0691244
1588	MA0801.1	0.00703115	0.0240604	0.508	0.48	1	0	MGA	0.0817941
1589	MA0801.1	7.25015e-10	0.216995	0.546	0.479	3.27707e-07	3	MGA	0.188875
1590	MA0801.1	8.56194e-09	-0.26604	0.423	0.498	3.87e-06	4	MGA	-0.235488
1591	MA0801.1	3.09528e-08	-0.483752	0.347	0.492	1.39907e-05	7	MGA	-0.503723
1592	MA0801.1	0.00363403	0.173339	0.448	0.49	1	5	MGA	-0.129283
1593	MA0801.1	8.15839e-05	-0.219509	0.412	0.492	0.0368759	6	MGA	-0.256014
1594	MA0802.1	0.00547018	-0.117205	0.531	0.485	1	1	TBR1	0.130727
1595	MA0802.1	1.30788e-05	-0.278878	0.446	0.499	0.00591164	4	TBR1	-0.161996
1596	MA0802.1	3.46212e-05	-0.35242	0.375	0.497	0.0156488	6	TBR1	-0.406355
1597	MA0803.1	0.00363403	0.173339	0.448	0.49	1	5	TBX15	-0.129283
1598	MA0803.1	3.09528e-08	-0.483752	0.347	0.492	1.39907e-05	7	TBX15	-0.503723
1599	MA0803.1	0.00703115	0.0240604	0.508	0.48	1	0	TBX15	0.0817941
1600	MA0803.1	8.15839e-05	-0.219509	0.412	0.492	0.0368759	6	TBX15	-0.256014
1601	MA0803.1	7.25015e-10	0.216995	0.546	0.479	3.27707e-07	3	TBX15	0.188875
1602	MA0803.1	8.56194e-09	-0.26604	0.423	0.498	3.87e-06	4	TBX15	-0.235488
1603	MA0804.1	5.59142e-05	-0.16775	0.446	0.495	0.0252732	4	TBX19	-0.150385
1604	MA0804.1	0.000256474	0.142173	0.509	0.48	0.115926	0	TBX19	0.0846313
1605	MA0804.1	0.0003749	-0.347401	0.363	0.492	0.169455	7	TBX19	-0.438689
1606	MA0805.1	0.000815537	0.0787157	0.519	0.481	0.368623	1	TBX1	0.109698
1607	MA0805.1	0.00198598	-0.443568	0.415	0.488	0.897663	7	TBX1	-0.23377
1608	MA0805.1	3.78017e-07	-0.368322	0.359	0.492	0.000170864	6	TBX1	-0.454674
1609	MA0805.1	1.06721e-08	0.106796	0.547	0.477	4.82379e-06	3	TBX1	0.197552
1610	MA0806.1	1.03247e-14	-0.413208	0.382	0.493	4.66675e-12	4	TBX4	-0.368015
1611	MA0806.1	3.62737e-07	0.0492199	0.514	0.462	0.000163957	0	TBX4	0.153876
1612	MA0806.1	3.25869e-12	-0.321835	0.342	0.484	1.47293e-09	6	TBX4	-0.501011
1613	MA0806.1	5.21026e-16	-0.85421	0.249	0.484	2.35504e-13	7	TBX4	-0.958861
1614	MA0806.1	0.0040288	0.146811	0.512	0.473	1	3	TBX4	0.114304
1615	MA0806.1	7.03837e-06	0.0916927	0.518	0.471	0.00318134	1	TBX4	0.137225
1616	MA0807.1	4.1924e-08	-0.238105	0.359	0.485	1.89496e-05	6	TBX5	-0.434001
1617	MA0807.1	7.51672e-09	0.214272	0.55	0.469	3.39756e-06	3	TBX5	0.229844
1618	MA0807.1	1.61621e-19	-0.718461	0.223	0.486	7.30526e-17	7	TBX5	-1.12391
1619	MA0807.1	3.19658e-18	-0.395542	0.368	0.497	1.44485e-15	4	TBX5	-0.43354
1620	MA0807.1	1.91153e-06	0.0336951	0.509	0.467	0.00086401	0	TBX5	0.124243
1621	MA0807.1	0.000791	0.0491937	0.51	0.474	0.357532	1	TBX5	0.10561
1622	MA0808.1	8.71571e-15	-0.33468	0.447	0.526	3.9395e-12	0	TEAD3	-0.234788
1623	MA0808.1	1.15517e-09	-0.434725	0.393	0.506	5.22136e-07	5	TEAD3	-0.364608
1624	MA0808.1	4.4992e-27	0.371046	0.633	0.482	2.03364e-24	4	TEAD3	0.393172
1625	MA0808.1	0.00109506	-0.138975	0.456	0.509	0.494968	3	TEAD3	-0.158632
1626	MA0808.1	1.40054e-36	1.24604	0.839	0.494	6.33044e-34	7	TEAD3	0.76416
1627	MA0809.1	2.03748e-23	0.388031	0.604	0.485	9.20942e-21	4	TEAD4	0.316564
1628	MA0809.1	2.44956e-28	1.05601	0.803	0.493	1.1072e-25	7	TEAD4	0.703812
1629	MA0809.1	8.58073e-10	-0.26934	0.459	0.519	3.87849e-07	0	TEAD4	-0.17724
1630	MA0809.1	7.3343e-11	-0.495905	0.393	0.505	3.3151e-08	5	TEAD4	-0.361754
1631	MA0809.1	5.95519e-05	-0.220851	0.457	0.507	0.0269175	3	TEAD4	-0.149792
1632	MA0810.1	7.79632e-05	0.0831377	0.525	0.487	0.0352393	1	TFAP2A(var.2)	0.108396
1633	MA0810.1	8.80683e-06	0.164161	0.541	0.485	0.00398069	3	TFAP2A(var.2)	0.157644
1634	MA0811.1	2.84683e-06	-0.235542	0.409	0.509	0.00128677	5	TFAP2B	-0.315565
1635	MA0811.1	0.00371564	-0.0926426	0.488	0.512	1	0	TFAP2B	-0.0692627
1636	MA0811.1	4.57316e-07	0.19291	0.561	0.495	0.000206707	3	TFAP2B	0.180572
1637	MA0811.1	0.000398133	0.0738367	0.549	0.496	0.179956	1	TFAP2B	0.146466
1638	MA0812.1	0.00236983	0.120913	0.531	0.494	1	1	TFAP2B(var.2)	0.104201
1639	MA0812.1	0.00196727	-0.0798632	0.435	0.503	0.889205	5	TFAP2B(var.2)	-0.209543
1640	MA0812.1	0.000342348	-0.0505779	0.474	0.512	0.154741	0	TFAP2B(var.2)	-0.111257
1641	MA0813.1	0.000435491	0.101246	0.538	0.497	0.196842	1	TFAP2B(var.3)	0.11436
1642	MA0814.1	0.000315645	-0.0421366	0.47	0.506	0.142671	0	TFAP2C(var.2)	-0.106477
1643	MA0814.1	0.000320996	0.0915818	0.538	0.488	0.14509	3	TFAP2C(var.2)	0.140725
1644	MA0814.1	0.000162933	-0.0996233	0.401	0.499	0.0736456	5	TFAP2C(var.2)	-0.315438
1645	MA0815.1	0.00692488	-0.0900509	0.479	0.503	1	0	TFAP2C(var.3)	-0.0705327
1646	MA0815.1	6.50379e-05	0.0873806	0.534	0.488	0.0293971	1	TFAP2C(var.3)	0.129959
1647	MA0817.1	0.00158165	0.126769	0.507	0.473	0.714904	2	BHLHE23	0.100146
1648	MA0817.1	7.37151e-05	-0.216225	0.442	0.484	0.0333192	4	BHLHE23	-0.130961
1649	MA0817.1	3.68688e-11	-0.508923	0.275	0.483	1.66647e-08	7	BHLHE23	-0.812592
1650	MA0818.1	1.24996e-05	-0.203609	0.443	0.493	0.00564984	4	BHLHE22	-0.154281
1651	MA0818.1	2.46858e-10	-0.429323	0.311	0.49	1.1158e-07	7	BHLHE22	-0.655867
1652	MA0820.1	0.00101783	0.676276	0.414	0.468	0.460058	5	FIGLA	-0.176878
1653	MA0820.1	1.05313e-17	-0.621405	0.361	0.481	4.76013e-15	4	FIGLA	-0.414038
1654	MA0820.1	1.79362e-22	-1.12704	0.212	0.471	8.10715e-20	7	FIGLA	-1.15166
1655	MA0820.1	3.43544e-18	0.352025	0.556	0.449	1.55282e-15	2	FIGLA	0.308369
1656	MA0820.1	2.36744e-34	-0.82991	0.21	0.476	1.07008e-31	6	FIGLA	-1.18057
1657	MA0820.1	2.94805e-20	0.29847	0.551	0.449	1.33252e-17	1	FIGLA	0.295337
1658	MA0821.1	0.000605199	-0.331311	0.389	0.488	0.27355	7	HES5	-0.327111
1659	MA0821.1	0.00136695	-0.0910582	0.453	0.491	0.617862	4	HES5	-0.116212
1660	MA0821.1	6.61546e-05	0.105443	0.515	0.473	0.0299019	0	HES5	0.122732
1661	MA0821.1	9.55451e-06	0.326453	0.565	0.483	0.00431864	5	HES5	0.226228
1662	MA0822.1	2.42976e-05	0.315432	0.565	0.481	0.0109825	5	HES7	0.232214
1663	MA0822.1	0.00993252	-0.21186	0.409	0.486	1	7	HES7	-0.248855
1664	MA0822.1	0.00186787	-0.0866536	0.444	0.49	0.844278	4	HES7	-0.142222
1665	MA0822.1	0.00221542	0.0521334	0.506	0.475	1	0	HES7	0.0912099
1666	MA0822.1	0.0032969	0.099848	0.512	0.479	1	1	HES7	0.0961182
1667	MA0822.1	0.00663143	-0.163041	0.446	0.49	1	3	HES7	-0.135738
1668	MA0823.1	1.27114e-05	0.0346389	0.496	0.458	0.00574553	0	HEY1	0.114993
1669	MA0823.1	0.00819614	-0.123644	0.438	0.475	1	3	HEY1	-0.116997
1670	MA0823.1	5.27823e-05	-0.213923	0.425	0.476	0.0238576	4	HEY1	-0.163499
1671	MA0823.1	2.14101e-05	-0.0825815	0.321	0.473	0.00967739	7	HEY1	-0.559267
1672	MA0823.1	1.27007e-18	0.543449	0.641	0.462	5.74072e-16	5	HEY1	0.472432
1673	MA0824.1	1.21968e-31	0.594712	0.559	0.418	5.51294e-29	1	ID4	0.419345
1674	MA0824.1	1.93719e-17	0.706872	0.522	0.425	8.7561e-15	2	ID4	0.296587
1675	MA0824.1	2.49275e-36	-2.05981	0.078	0.448	1.12672e-33	7	ID4	-2.52195
1676	MA0824.1	1.3802e-52	-0.579602	0.16	0.452	6.2385e-50	6	ID4	-1.49825
1677	MA0824.1	0.000313359	0.363007	0.383	0.443	0.141638	5	ID4	-0.209962
1678	MA0824.1	1.69694e-05	-0.463656	0.469	0.428	0.00767015	0	ID4	0.131977
1679	MA0824.1	9.67763e-34	-1.41238	0.279	0.464	4.37429e-31	4	ID4	-0.73386
1680	MA0825.1	5.1424e-05	-0.195904	0.419	0.485	0.0232437	4	MNT	-0.211035
1681	MA0825.1	0.00345641	-0.135497	0.434	0.483	1	3	MNT	-0.154328
1682	MA0825.1	0.00205249	-0.333277	0.378	0.478	0.927727	7	MNT	-0.338624
1683	MA0825.1	3.3084e-21	0.685391	0.677	0.467	1.4954e-18	5	MNT	0.535733
1684	MA0826.1	0.00840831	0.0776351	0.511	0.48	1	2	OLIG1	0.0902889
1685	MA0826.1	7.78711e-09	-0.414059	0.326	0.488	3.51977e-06	7	OLIG1	-0.582009
1686	MA0826.1	0.00060303	-0.175166	0.447	0.491	0.27257	4	OLIG1	-0.135448
1687	MA0826.1	0.00493674	0.088337	0.503	0.482	1	3	OLIG1	0.0615253
1688	MA0827.1	0.00951081	0.0737984	0.514	0.48	1	2	OLIG3	0.098734
1689	MA0827.1	0.00246512	-0.160427	0.443	0.492	1	4	OLIG3	-0.151352
1690	MA0827.1	0.000159068	-0.377815	0.373	0.488	0.0718988	7	OLIG3	-0.387706
1691	MA0828.1	3.315e-05	-0.398331	0.347	0.475	0.0149838	7	SREBF2(var.2)	-0.452992
1692	MA0828.1	0.000363411	-0.285885	0.409	0.475	0.164262	6	SREBF2(var.2)	-0.215827
1693	MA0828.1	2.13831e-08	-0.281186	0.414	0.481	9.66517e-06	4	SREBF2(var.2)	-0.216406
1694	MA0828.1	2.06265e-22	0.759177	0.659	0.464	9.32318e-20	5	SREBF2(var.2)	0.506154
1695	MA0828.1	8.71237e-33	0.428952	0.596	0.448	3.93799e-30	1	SREBF2(var.2)	0.411814
1696	MA0828.1	6.04634e-15	-0.372672	0.384	0.486	2.73295e-12	3	SREBF2(var.2)	-0.33985
1697	MA0830.1	7.08391e-37	-2.22929	0.093	0.448	3.20193e-34	7	TCF4	-2.2682
1698	MA0830.1	0.000170082	1.10365	0.38	0.443	0.0768769	5	TCF4	-0.221307
1699	MA0830.1	3.36673e-06	-0.668721	0.469	0.428	0.00152176	0	TCF4	0.131977
1700	MA0830.1	2.19642e-30	-1.5603	0.3	0.461	9.9278e-28	4	TCF4	-0.619804
1701	MA0830.1	2.12455e-54	-0.417459	0.132	0.453	9.60299e-52	6	TCF4	-1.77897
1702	MA0830.1	7.25571e-25	0.387775	0.549	0.42	3.27958e-22	1	TCF4	0.386417
1703	MA0830.1	1.31565e-17	0.790288	0.527	0.425	5.94674e-15	2	TCF4	0.31034
1704	MA0831.2	1.42927e-57	0.717468	0.616	0.43	6.4603e-55	1	TFE3	0.518594
1705	MA0831.2	4.15014e-05	-0.250042	0.426	0.476	0.0187586	0	TFE3	-0.160108
1706	MA0831.2	1.10732e-23	-0.63282	0.349	0.477	5.00509e-21	4	TFE3	-0.450762
1707	MA0831.2	1.30881e-10	-0.686587	0.285	0.464	5.91583e-08	7	TFE3	-0.703163
1708	MA0831.2	8.88318e-06	-0.382286	0.413	0.468	0.0040152	3	TFE3	-0.180367
1709	MA0831.2	1.70452e-40	0.857251	0.74	0.448	7.70444e-38	5	TFE3	0.724027
1710	MA0831.2	4.15405e-06	-0.344111	0.392	0.463	0.00187763	6	TFE3	-0.240159
1711	MA0833.1	2.51481e-07	-1.08794	0.51	0.448	0.000113669	3	ATF4	0.186999
1712	MA0833.1	5.81748e-05	-1.67174	0.383	0.459	0.026295	7	ATF4	-0.26115
1713	MA0833.1	1.18234e-63	4.07443	0.76	0.443	5.34418e-61	5	ATF4	0.778693
1714	MA0833.1	6.23211e-35	-1.95987	0.305	0.479	2.81691e-32	4	ATF4	-0.651216
1715	MA0833.1	1.99629e-07	-1.4584	0.367	0.461	9.02323e-05	6	ATF4	-0.328987
1716	MA0834.1	0.00510713	0.00313729	0.495	0.461	1	0	ATF7	0.102662
1717	MA0834.1	1.827e-11	-0.27563	0.387	0.484	8.25804e-09	4	ATF7	-0.322673
1718	MA0834.1	8.95045e-10	-0.129208	0.427	0.48	4.0456e-07	1	ATF7	-0.168798
1719	MA0834.1	6.80946e-33	0.856876	0.693	0.462	3.07788e-30	5	ATF7	0.584963
1720	MA0834.1	0.000165892	0.0518599	0.506	0.466	0.0749833	2	ATF7	0.118807
1721	MA0835.1	0.00168318	-0.210544	0.417	0.477	0.760797	6	BATF3	-0.193942
1722	MA0835.1	9.5465e-08	-0.156317	0.434	0.483	4.31502e-05	1	BATF3	-0.154328
1723	MA0835.1	7.78277e-06	0.0709567	0.503	0.462	0.00351781	0	BATF3	0.122666
1724	MA0835.1	0.000179711	0.0623203	0.516	0.468	0.0812292	3	BATF3	0.140863
1725	MA0835.1	6.16027e-22	0.675686	0.672	0.466	2.78444e-19	5	BATF3	0.528131
1726	MA0835.1	1.33659e-14	-0.293452	0.378	0.489	6.04137e-12	4	BATF3	-0.371448
1727	MA0836.1	1.92588e-66	-1.9947	0.223	0.46	8.70498e-64	4	CEBPD	-1.04459
1728	MA0836.1	4.10847e-10	-1.20237	0.305	0.435	1.85703e-07	6	CEBPD	-0.512206
1729	MA0836.1	9.15831e-09	-1.10157	0.471	0.411	4.13956e-06	0	CEBPD	0.196589
1730	MA0836.1	8.72823e-65	3.38453	0.74	0.416	3.94516e-62	5	CEBPD	0.830942
1731	MA0836.1	2.80701e-23	-2.16963	0.14	0.436	1.26877e-20	7	CEBPD	-1.6389
1732	MA0836.1	4.40784e-15	-0.282817	0.507	0.415	1.99234e-12	1	CEBPD	0.288874
1733	MA0837.1	2.42515e-54	3.9485	0.721	0.414	1.09617e-51	5	CEBPE	0.800368
1734	MA0837.1	8.90746e-08	-1.62818	0.462	0.411	4.02617e-05	0	CEBPE	0.168754
1735	MA0837.1	2.14671e-12	-1.92178	0.261	0.434	9.70312e-10	6	CEBPE	-0.733645
1736	MA0837.1	1.57648e-23	-2.88148	0.14	0.433	7.12567e-21	7	CEBPE	-1.62894
1737	MA0837.1	1.13107e-75	-2.72726	0.198	0.46	5.11244e-73	4	CEBPE	-1.21613
1738	MA0837.1	1.16402e-20	-0.672555	0.529	0.407	5.26138e-18	1	CEBPE	0.378239
1739	MA0838.1	1.35679e-83	-2.7901	0.203	0.459	6.13269e-81	4	CEBPG	-1.17701
1740	MA0838.1	6.33291e-11	-1.593	0.272	0.432	2.86247e-08	6	CEBPG	-0.667425
1741	MA0838.1	6.73103e-61	4.12449	0.727	0.412	3.04242e-58	5	CEBPG	0.819311
1742	MA0838.1	3.82438e-27	-2.95769	0.109	0.433	1.72862e-24	7	CEBPG	-1.99004
1743	MA0838.1	5.58307e-10	-1.7016	0.469	0.406	2.52355e-07	0	CEBPG	0.208108
1744	MA0838.1	4.56492e-19	-0.661388	0.515	0.409	2.06334e-16	1	CEBPG	0.332472
1745	MA0839.1	5.48656e-05	0.230968	0.562	0.49	0.0247992	5	CREB3L1	0.197788
1746	MA0839.1	0.00018008	0.0190682	0.524	0.479	0.0813962	0	CREB3L1	0.129541
1747	MA0839.1	0.000159377	-0.141805	0.457	0.499	0.0720384	4	CREB3L1	-0.126846
1748	MA0839.1	4.18355e-05	-0.30082	0.389	0.496	0.0189096	7	CREB3L1	-0.35057
1749	MA0841.1	2.89731e-10	1.02419	0.632	0.465	1.30958e-07	7	NFE2	0.442694
1750	MA0841.1	1.58824e-60	-3.78012	0.303	0.499	7.17885e-58	2	NFE2	-0.719722
1751	MA0841.1	1.69054e-18	-2.87342	0.592	0.451	7.64126e-16	4	NFE2	0.39247
1752	MA0841.1	5.00279e-77	-5.15968	0.339	0.528	2.26126e-74	0	NFE2	-0.639253
1753	MA0841.1	0	4.26118	0.926	0.395	0	3	NFE2	1.22916
1754	MA0841.1	8.93115e-15	-3.94569	0.41	0.48	4.03688e-12	1	NFE2	-0.22741
1755	MA0841.1	9.39539e-23	-3.33289	0.276	0.478	4.24672e-20	5	NFE2	-0.792342
1756	MA0842.1	3.34179e-48	-0.603137	0.359	0.547	1.51049e-45	2	NRL	-0.607557
1757	MA0842.1	8.84252e-05	-0.202018	0.494	0.528	0.0399682	0	NRL	-0.0960269
1758	MA0842.1	1.70598e-14	0.211757	0.612	0.503	7.71105e-12	3	NRL	0.282973
1759	MA0842.1	3.47714e-12	0.61098	0.715	0.513	1.57167e-09	7	NRL	0.478984
1760	MA0842.1	2.01463e-15	0.211095	0.606	0.505	9.10614e-13	4	NRL	0.263034
1761	MA0842.1	2.05573e-16	0.311339	0.593	0.503	9.2919e-14	1	NRL	0.237474
1762	MA0842.1	1.18886e-41	-0.855883	0.237	0.53	5.37366e-39	5	NRL	-1.16111
1763	MA0843.1	7.72046e-13	-0.20056	0.403	0.495	3.48965e-10	2	TEF	-0.296649
1764	MA0843.1	2.67508e-36	0.545075	0.597	0.458	1.20913e-33	1	TEF	0.382383
1765	MA0843.1	5.4126e-05	0.718987	0.539	0.478	0.0244649	5	TEF	0.173275
1766	MA0843.1	0.000235981	-0.244646	0.441	0.487	0.106663	3	TEF	-0.143143
1767	MA0843.1	0.000181589	-0.386206	0.433	0.487	0.0820784	4	TEF	-0.169555
1768	MA0844.1	7.64761e-05	-0.0317172	0.45	0.497	0.0345672	1	XBP1	-0.143321
1769	MA0845.1	1.29252e-07	0.131411	0.554	0.485	5.8422e-05	4	FOXB1	0.191901
1770	MA0845.1	1.50908e-05	0.152694	0.585	0.49	0.00682103	6	FOXB1	0.255655
1771	MA0845.1	0.00125296	-0.112951	0.459	0.499	0.566336	3	FOXB1	-0.120546
1772	MA0845.1	3.12423e-10	-0.219181	0.44	0.504	1.41215e-07	1	FOXB1	-0.19592
1773	MA0845.1	4.37364e-17	0.722391	0.725	0.489	1.97688e-14	7	FOXB1	0.568147
1774	MA0846.1	0.000191921	0.526172	0.57	0.492	0.0867481	5	FOXC2	0.212304
1775	MA0846.1	5.52691e-10	-0.247166	0.445	0.505	2.49816e-07	1	FOXC2	-0.182478
1776	MA0846.1	1.71196e-29	0.751569	0.813	0.489	7.73806e-27	7	FOXC2	0.733421
1777	MA0846.1	7.28975e-15	-0.277273	0.409	0.51	3.29497e-12	3	FOXC2	-0.318396
1778	MA0846.1	0.000371215	0.263672	0.549	0.493	0.167789	6	FOXC2	0.155219
1779	MA0846.1	1.38641e-14	0.173559	0.583	0.483	6.2666e-12	4	FOXC2	0.271473
1780	MA0847.1	1.89003e-22	-0.481461	0.42	0.531	8.54296e-20	2	FOXD2	-0.338323
1781	MA0847.1	6.49328e-17	-0.588942	0.341	0.521	2.93496e-14	5	FOXD2	-0.611512
1782	MA0847.1	6.16139e-51	1.70116	0.891	0.505	2.78495e-48	7	FOXD2	0.819142
1783	MA0847.1	5.54308e-11	-0.321393	0.477	0.53	2.50547e-08	0	FOXD2	-0.152003
1784	MA0847.1	9.8034e-55	0.487537	0.686	0.488	4.43114e-52	4	FOXD2	0.491327
1785	MA0847.1	0.000218358	0.0570452	0.555	0.507	0.0986977	3	FOXD2	0.130502
1786	MA0848.1	1.89003e-22	-0.481461	0.42	0.531	8.54296e-20	2	FOXO4	-0.338323
1787	MA0848.1	6.49328e-17	-0.588942	0.341	0.521	2.93496e-14	5	FOXO4	-0.611512
1788	MA0848.1	9.8034e-55	0.487537	0.686	0.488	4.43114e-52	4	FOXO4	0.491327
1789	MA0848.1	0.000218358	0.0570452	0.555	0.507	0.0986977	3	FOXO4	0.130502
1790	MA0848.1	6.16139e-51	1.70116	0.891	0.505	2.78495e-48	7	FOXO4	0.819142
1791	MA0848.1	5.54308e-11	-0.321393	0.477	0.53	2.50547e-08	0	FOXO4	-0.152003
1792	MA0849.1	6.49328e-17	-0.588942	0.341	0.521	2.93496e-14	5	FOXO6	-0.611512
1793	MA0849.1	0.000218358	0.0570452	0.555	0.507	0.0986977	3	FOXO6	0.130502
1794	MA0849.1	5.54308e-11	-0.321393	0.477	0.53	2.50547e-08	0	FOXO6	-0.152003
1795	MA0849.1	9.8034e-55	0.487537	0.686	0.488	4.43114e-52	4	FOXO6	0.491327
1796	MA0849.1	1.89003e-22	-0.481461	0.42	0.531	8.54296e-20	2	FOXO6	-0.338323
1797	MA0849.1	6.16139e-51	1.70116	0.891	0.505	2.78495e-48	7	FOXO6	0.819142
1798	MA0850.1	1.89003e-22	-0.481461	0.42	0.531	8.54296e-20	2	FOXP3	-0.338323
1799	MA0850.1	6.16139e-51	1.70116	0.891	0.505	2.78495e-48	7	FOXP3	0.819142
1800	MA0850.1	9.8034e-55	0.487537	0.686	0.488	4.43114e-52	4	FOXP3	0.491327
1801	MA0850.1	6.49328e-17	-0.588942	0.341	0.521	2.93496e-14	5	FOXP3	-0.611512
1802	MA0850.1	0.000218358	0.0570452	0.555	0.507	0.0986977	3	FOXP3	0.130502
1803	MA0850.1	5.54308e-11	-0.321393	0.477	0.53	2.50547e-08	0	FOXP3	-0.152003
1804	MA0852.2	6.37952e-14	-0.363942	0.436	0.525	2.88354e-11	2	FOXK1	-0.267989
1805	MA0852.2	1.19733e-42	1.34466	0.86	0.504	5.41194e-40	7	FOXK1	0.770913
1806	MA0852.2	7.80451e-13	-0.481776	0.367	0.518	3.52764e-10	5	FOXK1	-0.497172
1807	MA0852.2	3.02152e-44	0.373101	0.67	0.488	1.36573e-41	4	FOXK1	0.45728
1808	MA0852.2	3.80998e-09	-0.180578	0.472	0.529	1.72211e-06	0	FOXK1	-0.164481
1809	MA0855.1	6.58548e-13	-0.6623	0.28	0.487	2.97663e-10	7	RXRB	-0.798495
1810	MA0855.1	0.00222386	-0.046641	0.429	0.485	1	6	RXRB	-0.177007
1811	MA0855.1	1.80116e-34	0.361499	0.606	0.459	8.14124e-32	1	RXRB	0.400824
1812	MA0855.1	5.74227e-23	-0.330794	0.363	0.501	2.59551e-20	4	RXRB	-0.464841
1813	MA0855.1	1.59003e-14	0.611623	0.635	0.476	7.18692e-12	5	RXRB	0.415795
1814	MA0856.1	4.13718e-14	-0.708502	0.269	0.491	1.87001e-11	7	RXRG	-0.868117
1815	MA0856.1	2.89257e-34	0.328809	0.597	0.465	1.30744e-31	1	RXRG	0.3605
1816	MA0856.1	1.17124e-22	-0.336207	0.375	0.502	5.29402e-20	4	RXRG	-0.420797
1817	MA0856.1	3.23344e-12	0.588199	0.615	0.48	1.46152e-09	5	RXRG	0.357552
1818	MA0861.1	0.00947783	-0.209967	0.389	0.49	1	7	TP73	-0.333012
1819	MA0862.1	2.13193e-17	0.623307	0.628	0.466	9.63632e-15	5	GMEB2	0.430435
1820	MA0862.1	0.00202626	0.4961	0.575	0.471	0.915869	7	GMEB2	0.287835
1821	MA0863.1	8.72385e-05	0.111705	0.543	0.493	0.0394318	4	MTF1	0.139365
1822	MA0863.1	0.0038718	0.249092	0.591	0.497	1	7	MTF1	0.249912
1823	MA0864.1	0.00892397	-0.0958772	0.464	0.488	1	1	E2F2	-0.0727563
1824	MA0864.1	1.18254e-11	0.417782	0.622	0.478	5.34506e-09	5	E2F2	0.379904
1825	MA0864.1	1.0408e-11	-0.295012	0.417	0.495	4.70442e-09	3	E2F2	-0.247381
1826	MA0864.1	0.00162111	0.261277	0.549	0.483	0.732743	7	E2F2	0.184783
1827	MA0865.1	0.00394856	-0.139167	0.455	0.489	1	4	E2F8	-0.103968
1828	MA0865.1	3.33515e-30	-0.403338	0.36	0.505	1.50749e-27	3	E2F8	-0.488286
1829	MA0865.1	8.65633e-12	0.164773	0.558	0.471	3.91266e-09	1	E2F8	0.244538
1830	MA0865.1	4.83455e-09	0.190548	0.542	0.474	2.18522e-06	2	E2F8	0.193406
1831	MA0865.1	2.61518e-07	0.490798	0.589	0.48	0.000118206	5	E2F8	0.295233
1832	MA0867.1	9.82069e-06	0.426038	0.637	0.497	0.00443895	7	SOX4	0.358048
1833	MA0867.1	0.00328717	-0.0830698	0.467	0.506	1	2	SOX4	-0.115715
1834	MA0867.1	7.70236e-06	0.151307	0.556	0.492	0.00348146	4	SOX4	0.176427
1835	MA0871.1	5.98862e-08	-0.662826	0.28	0.463	2.70686e-05	7	TFEC	-0.725585
1836	MA0871.1	0.000131205	-0.291484	0.421	0.465	0.0593045	3	TFEC	-0.14341
1837	MA0871.1	4.14739e-45	0.620658	0.605	0.431	1.87462e-42	1	TFEC	0.489247
1838	MA0871.1	0.00758494	-0.172056	0.44	0.468	1	0	TFEC	-0.089005
1839	MA0871.1	3.08135e-29	0.671436	0.677	0.449	1.39277e-26	5	TFEC	0.59244
1840	MA0871.1	0.00352478	-0.217456	0.384	0.462	1	6	TFEC	-0.266787
1841	MA0871.1	2.02146e-19	-0.477821	0.356	0.474	9.13701e-17	4	TFEC	-0.41301
1842	MA0872.1	5.53576e-05	0.0702702	0.531	0.49	0.0250216	1	TFAP2A(var.3)	0.11593
1843	MA0872.1	0.0085923	-0.0622891	0.483	0.503	1	0	TFAP2A(var.3)	-0.0585352
1844	MA0873.1	7.54379e-05	0.425025	0.627	0.482	0.0340979	7	HOXD12	0.379432
1845	MA0873.1	0.000532816	-0.351086	0.417	0.488	0.240833	5	HOXD12	-0.226834
1846	MA0873.1	0.00101861	-0.328811	0.429	0.487	0.46041	6	HOXD12	-0.182944
1847	MA0873.1	6.74934e-05	0.199811	0.52	0.478	0.030507	1	HOXD12	0.121501
1848	MA0875.1	1.97974e-07	0.494838	0.637	0.498	8.94842e-05	7	BARX1	0.355148
1849	MA0875.1	0.000290462	-0.162783	0.43	0.504	0.131289	5	BARX1	-0.229087
1850	MA0875.1	0.000103218	-0.129305	0.475	0.512	0.0466544	0	BARX1	-0.108216
1851	MA0875.1	5.13189e-16	0.319114	0.599	0.486	2.31962e-13	4	BARX1	0.3016
1852	MA0875.1	0.00177103	-0.146148	0.473	0.506	0.800503	2	BARX1	-0.0972972
1853	MA0876.1	1.56106e-07	0.194753	0.549	0.481	7.05598e-05	4	BSX	0.190769
1854	MA0876.1	1.31205e-11	-0.247487	0.413	0.502	5.93046e-09	3	BSX	-0.281546
1855	MA0876.1	6.11812e-08	0.43706	0.632	0.486	2.76539e-05	7	BSX	0.378968
1856	MA0876.1	0.000390937	-0.103747	0.453	0.496	0.176703	2	BSX	-0.130829
1857	MA0876.1	0.000119908	0.0766912	0.536	0.481	0.0541985	1	BSX	0.156196
1858	MA0876.1	0.00152178	0.20422	0.549	0.487	0.687844	6	BSX	0.172884
1859	MA0878.1	2.92917e-09	0.144024	0.542	0.48	1.32399e-06	1	CDX1	0.175258
1860	MA0878.1	2.68633e-05	0.168355	0.546	0.482	0.0121422	4	CDX1	0.179868
1861	MA0878.1	0.00028138	-0.173198	0.451	0.497	0.127184	3	CDX1	-0.140118
1862	MA0878.1	2.71614e-09	0.570028	0.648	0.487	1.22769e-06	7	CDX1	0.412072
1863	MA0878.1	9.27437e-05	-0.216694	0.424	0.493	0.0419201	5	CDX1	-0.217523
1864	MA0882.1	4.75086e-07	-0.238278	0.45	0.505	0.000214739	3	DLX6	-0.166358
1865	MA0882.1	0.000282989	0.164774	0.583	0.494	0.127911	6	DLX6	0.238985
1866	MA0882.1	0.000210278	-0.181693	0.46	0.504	0.0950458	2	DLX6	-0.13179
1867	MA0882.1	1.97946e-13	0.759479	0.689	0.493	8.94716e-11	7	DLX6	0.482916
1868	MA0882.1	6.12232e-10	0.271102	0.564	0.487	2.76729e-07	4	DLX6	0.211773
1869	MA0884.1	0.000846937	0.177298	0.563	0.498	0.382816	6	DUXA	0.176989
1870	MA0884.1	0.000214602	0.199222	0.627	0.498	0.0970001	7	DUXA	0.33232
1871	MA0884.1	3.13321e-06	-0.18067	0.455	0.509	0.00141621	2	DUXA	-0.161799
1872	MA0884.1	0.00129456	0.223615	0.524	0.497	0.58514	4	DUXA	0.076321
1873	MA0886.1	8.74757e-05	-0.153158	0.458	0.5	0.039539	2	EMX2	-0.12658
1874	MA0886.1	2.64963e-10	0.244032	0.557	0.484	1.19763e-07	4	EMX2	0.20267
1875	MA0886.1	7.03753e-14	0.651529	0.71	0.489	3.18096e-11	7	EMX2	0.537985
1876	MA0887.1	8.27931e-06	-0.144673	0.461	0.505	0.00374225	0	EVX1	-0.131517
1877	MA0887.1	3.72082e-09	0.223414	0.552	0.482	1.68181e-06	4	EVX1	0.195635
1878	MA0887.1	0.0001067	-0.105871	0.411	0.495	0.0482283	5	EVX1	-0.26829
1879	MA0887.1	0.00016738	0.151862	0.569	0.488	0.0756559	6	EVX1	0.221548
1880	MA0887.1	3.98434e-09	0.350892	0.679	0.487	1.80092e-06	7	EVX1	0.47949
1881	MA0888.1	3.28492e-05	-0.219719	0.422	0.498	0.0148478	5	EVX2	-0.238903
1882	MA0888.1	0.00625006	-0.0423834	0.469	0.499	1	3	EVX2	-0.0894519
1883	MA0888.1	0.00758455	0.136244	0.543	0.493	1	6	EVX2	0.139365
1884	MA0888.1	0.00148245	-0.138503	0.471	0.506	0.670066	0	EVX2	-0.10341
1885	MA0888.1	9.3909e-12	0.504932	0.699	0.49	4.24469e-09	7	EVX2	0.512511
1886	MA0888.1	4.7176e-09	0.216702	0.555	0.486	2.13236e-06	4	EVX2	0.191531
1887	MA0889.1	7.95722e-07	-0.177864	0.445	0.507	0.000359667	2	GBX1	-0.18818
1888	MA0889.1	3.25685e-09	0.747132	0.653	0.494	1.47209e-06	7	GBX1	0.402572
1889	MA0889.1	9.5044e-10	0.209503	0.559	0.489	4.29599e-07	4	GBX1	0.193014
1890	MA0889.1	1.03318e-05	-0.19394	0.451	0.505	0.00466995	3	GBX1	-0.163156
1891	MA0889.1	0.000155594	0.0916784	0.529	0.492	0.0703285	1	GBX1	0.104609
1892	MA0890.1	2.75346e-05	-0.164814	0.47	0.507	0.0124457	2	GBX2	-0.109325
1893	MA0890.1	8.50707e-07	-0.20847	0.456	0.509	0.00038452	3	GBX2	-0.158632
1894	MA0890.1	6.43528e-07	0.117405	0.541	0.494	0.000290875	1	GBX2	0.131118
1895	MA0890.1	2.66798e-14	0.334332	0.58	0.49	1.20593e-11	4	GBX2	0.243271
1896	MA0890.1	7.61866e-05	-0.124663	0.48	0.511	0.0344364	0	GBX2	-0.0902889
1897	MA0890.1	2.99852e-11	0.485576	0.648	0.498	1.35533e-08	7	GBX2	0.379848
1898	MA0891.1	2.44951e-06	0.289173	0.642	0.49	0.00110718	7	GSC2	0.389792
1899	MA0891.1	0.000196974	-0.082482	0.471	0.503	0.0890324	0	GSC2	-0.0948313
1900	MA0891.1	0.000434882	0.316303	0.546	0.491	0.196567	6	GSC2	0.153178
1901	MA0891.1	0.000802959	0.163806	0.524	0.489	0.362937	4	GSC2	0.0997323
1902	MA0891.1	0.000619309	-0.161686	0.459	0.499	0.279928	3	GSC2	-0.120546
1903	MA0892.1	3.49509e-10	0.547626	0.684	0.491	1.57978e-07	7	GSX1	0.478273
1904	MA0892.1	0.00584958	-0.0373338	0.479	0.503	1	0	GSX1	-0.0705327
1905	MA0892.1	6.7625e-09	0.372011	0.549	0.488	3.05665e-06	4	GSX1	0.169925
1906	MA0893.1	8.45792e-09	0.224241	0.562	0.481	3.82298e-06	4	GSX2	0.224533
1907	MA0893.1	1.40142e-06	0.497525	0.653	0.488	0.000633441	7	GSX2	0.420202
1908	MA0893.1	0.00567037	-0.0780181	0.463	0.496	1	3	GSX2	-0.0993279
1909	MA0894.1	2.00844e-14	0.324024	0.577	0.484	9.07815e-12	4	HESX1	0.253564
1910	MA0894.1	4.3898e-05	-0.188153	0.46	0.502	0.0198419	2	HESX1	-0.126054
1911	MA0894.1	7.79845e-14	-0.26728	0.409	0.51	3.5249e-11	3	HESX1	-0.318396
1912	MA0894.1	1.72732e-08	0.175298	0.556	0.484	7.80747e-06	1	HESX1	0.200078
1913	MA0894.1	0.00012556	-0.14498	0.471	0.507	0.0567533	0	HESX1	-0.106259
1914	MA0894.1	3.59765e-10	0.490446	0.658	0.492	1.62614e-07	7	HESX1	0.419429
1915	MA0899.1	4.63205e-07	-0.277749	0.38	0.502	0.000209369	5	HOXA10	-0.401688
1916	MA0899.1	5.60092e-05	-0.15558	0.456	0.504	0.0253162	2	HOXA10	-0.14439
1917	MA0899.1	1.1696e-11	0.512399	0.694	0.493	5.2866e-09	7	HOXA10	0.493348
1918	MA0899.1	2.1319e-12	0.27548	0.578	0.485	9.6362e-10	4	HOXA10	0.253085
1919	MA0900.1	1.5861e-10	0.50447	0.689	0.498	7.16916e-08	7	HOXA2	0.468358
1920	MA0900.1	0.000180416	-0.163812	0.466	0.509	0.0815481	2	HOXA2	-0.127336
1921	MA0900.1	4.95858e-11	0.274923	0.581	0.49	2.24128e-08	4	HOXA2	0.245756
1922	MA0900.1	0.00326797	-0.0954329	0.483	0.511	1	0	HOXA2	-0.0813001
1923	MA0901.1	1.58606e-07	0.240041	0.555	0.493	7.16901e-05	4	HOXB13	0.1709
1924	MA0901.1	5.54438e-13	0.696235	0.731	0.496	2.50606e-10	7	HOXB13	0.559531
1925	MA0901.1	2.1493e-09	-0.270361	0.438	0.511	9.71485e-07	3	HOXB13	-0.222392
1926	MA0902.1	0.00423323	-0.111469	0.438	0.499	1	5	HOXB2	-0.188109
1927	MA0902.1	5.98323e-15	0.237942	0.588	0.483	2.70442e-12	4	HOXB2	0.283793
1928	MA0902.1	0.00331165	-0.0901263	0.466	0.502	1	2	HOXB2	-0.107357
1929	MA0902.1	3.18108e-10	0.571244	0.689	0.492	1.43785e-07	7	HOXB2	0.485846
1930	MA0902.1	0.000733937	-0.0593202	0.454	0.503	0.33174	3	HOXB2	-0.147866
1931	MA0903.1	1.34103e-07	-0.166452	0.441	0.509	6.06144e-05	2	HOXB3	-0.206887
1932	MA0903.1	4.68936e-21	0.814752	0.772	0.492	2.11959e-18	7	HOXB3	0.649943
1933	MA0903.1	1.87905e-23	0.385085	0.607	0.482	8.49333e-21	4	HOXB3	0.332663
1934	MA0903.1	9.07352e-07	-0.177319	0.464	0.514	0.000410123	0	HOXB3	-0.147644
1935	MA0903.1	7.5906e-05	-0.0889919	0.424	0.501	0.0343095	5	HOXB3	-0.240746
1936	MA0905.1	0.00808561	-0.112138	0.431	0.491	1	6	HOXC10	-0.188035
1937	MA0905.1	6.61954e-05	-0.358156	0.43	0.491	0.0299203	5	HOXC10	-0.191386
1938	MA0905.1	4.99643e-05	0.141235	0.529	0.481	0.0225839	1	HOXC10	0.137231
1939	MA0905.1	1.21784e-06	0.53106	0.622	0.486	0.000550462	7	HOXC10	0.355958
1940	MA0906.1	0.00135722	0.273487	0.565	0.485	0.613464	7	HOXC12	0.220266
1941	MA0907.1	3.70896e-05	0.269682	0.622	0.486	0.0167645	7	HOXC13	0.355958
1942	MA0907.1	8.0734e-05	0.0216714	0.537	0.481	0.0364918	3	HOXC13	0.158885
1943	MA0907.1	0.00304964	-0.132206	0.417	0.492	1	5	HOXC13	-0.238611
1944	MA0907.1	3.56238e-05	-0.183581	0.43	0.5	0.0161019	2	HOXC13	-0.217591
1945	MA0908.1	8.94932e-05	0.138865	0.509	0.485	0.0404509	1	HOXD11	0.0696809
1946	MA0908.1	1.36534e-08	0.465223	0.642	0.486	6.17135e-06	7	HOXD11	0.401617
1947	MA0908.1	0.00420853	-0.225047	0.438	0.491	1	5	HOXD11	-0.164792
1948	MA0908.1	0.00771762	-0.0843314	0.469	0.498	1	0	HOXD11	-0.0865578
1949	MA0908.1	0.0031084	-0.124433	0.463	0.494	1	2	HOXD11	-0.0934988
1950	MA0909.1	1.14996e-06	-0.208324	0.439	0.505	0.000519783	3	HOXD13	-0.202062
1951	MA0909.1	4.14962e-06	0.218985	0.55	0.488	0.00187563	4	HOXD13	0.17255
1952	MA0909.1	1.66583e-09	0.490859	0.668	0.492	7.52957e-07	7	HOXD13	0.44119
1953	MA0909.1	9.24114e-05	-0.191143	0.409	0.5	0.0417699	5	HOXD13	-0.289827
1954	MA0914.1	0.000158877	-0.190119	0.471	0.503	0.0718125	2	ISL2	-0.0948313
1955	MA0914.1	0.00398243	-0.0386701	0.477	0.507	1	0	ISL2	-0.0879965
1956	MA0914.1	1.83761e-12	0.450996	0.663	0.494	8.30599e-10	7	ISL2	0.424498
1957	MA0914.1	2.52369e-08	-0.249162	0.388	0.503	1.14071e-05	5	ISL2	-0.374502
1958	MA0914.1	5.29605e-09	0.197745	0.553	0.49	2.39381e-06	4	ISL2	0.174498
1959	MA1100.1	0.00866136	-0.0307209	0.491	0.459	1	0	ASCL1	0.0972289
1960	MA1100.1	9.78439e-10	0.095029	0.532	0.459	4.42254e-07	3	ASCL1	0.212932
1961	MA1100.1	1.18406e-19	-0.668044	0.277	0.477	5.35197e-17	6	ASCL1	-0.784103
1962	MA1100.1	7.48072e-15	-0.845966	0.373	0.483	3.38129e-12	4	ASCL1	-0.372848
1963	MA1100.1	2.50122e-15	-1.25454	0.233	0.474	1.13055e-12	7	ASCL1	-1.02456
1964	MA1100.1	5.94979e-19	0.100583	0.328	0.475	2.6893e-16	5	ASCL1	-0.534232
1965	MA1100.1	3.22419e-33	0.769707	0.578	0.449	1.45733e-30	2	ASCL1	0.364354
1966	MA1101.1	8.75473e-32	1.76978	0.87	0.528	3.95714e-29	7	BACH2	0.720477
1967	MA1101.1	0	2.83453	0.898	0.477	0	3	BACH2	0.912726
1968	MA1101.1	8.78797e-56	-0.773259	0.745	0.504	3.97216e-53	4	BACH2	0.563817
1969	MA1101.1	3.14437e-88	-3.50411	0.148	0.552	1.42125e-85	5	BACH2	-1.89907
1970	MA1101.1	3.22634e-154	-2.61797	0.251	0.587	1.45831e-151	2	BACH2	-1.22567
1971	MA1101.1	2.79081e-51	-2.69427	0.437	0.579	1.26145e-48	0	BACH2	-0.40593
1972	MA1102.1	1.15472e-05	-1.62597	0.503	0.457	0.00521934	4	CTCFL	0.138364
1973	MA1102.1	4.31638e-39	-0.984836	0.599	0.437	1.951e-36	2	CTCFL	0.454923
1974	MA1102.1	3.18057e-06	3.58474	0.574	0.458	0.00143762	6	CTCFL	0.325703
1975	MA1102.1	3.7748e-52	0.973654	0.745	0.45	1.70621e-49	5	CTCFL	0.727315
1976	MA1102.1	1.06324e-107	-2.46812	0.211	0.503	4.80583e-105	3	CTCFL	-1.25332
1977	MA1102.1	0.00031326	-0.912875	0.575	0.46	0.141593	7	CTCFL	0.321928
1978	MA1102.1	3.58914e-63	-0.993604	0.565	0.416	1.62229e-60	0	CTCFL	0.441667
1979	MA1102.1	6.28221e-192	-1.63294	0.198	0.513	2.83956e-189	1	CTCFL	-1.37346
1980	MA1103.1	5.54424e-13	-0.373212	0.438	0.524	2.506e-10	2	FOXK2	-0.258636
1981	MA1103.1	6.86011e-12	-0.456787	0.359	0.517	3.10077e-09	5	FOXK2	-0.52618
1982	MA1103.1	4.21699e-45	1.48454	0.87	0.503	1.90608e-42	7	FOXK2	0.790457
1983	MA1103.1	6.85776e-08	-0.254262	0.458	0.521	3.09971e-05	1	FOXK2	-0.185936
1984	MA1103.1	4.07734e-06	-0.233021	0.481	0.524	0.00184296	0	FOXK2	-0.12353
1985	MA1103.1	2.54403e-48	0.52511	0.671	0.487	1.1499e-45	4	FOXK2	0.462391
1986	MA1104.1	4.88886e-52	-5.23321	0.384	0.548	2.20977e-49	2	GATA6	-0.51307
1987	MA1104.1	1.8495e-107	-4.244	0.835	0.477	8.35972e-105	4	GATA6	0.807787
1988	MA1104.1	1.39214e-51	-0.891883	0.953	0.513	6.29245e-49	7	GATA6	0.893517
1989	MA1104.1	3.01909e-166	5.91762	0.989	0.503	1.36463e-163	6	GATA6	0.975412
1990	MA1104.1	6.98368e-19	-1.43065	0.607	0.506	3.15662e-16	1	GATA6	0.262559
1991	MA1104.1	5.63266e-53	-3.1854	0.221	0.536	2.54596e-50	5	GATA6	-1.27819
1992	MA1104.1	1.43271e-92	-5.68356	0.368	0.592	6.47586e-90	0	GATA6	-0.685891
1993	MA1105.1	1.48047e-07	-0.146634	0.443	0.505	6.69172e-05	2	GRHL2	-0.188977
1994	MA1105.1	5.18584e-11	0.484457	0.684	0.491	2.344e-08	7	GRHL2	0.478273
1995	MA1105.1	8.12739e-13	0.366481	0.573	0.484	3.67358e-10	4	GRHL2	0.243528
1996	MA1106.1	0.00248381	0.16732	0.505	0.485	1	4	HIF1A	0.0582986
1997	MA1106.1	6.8396e-05	0.263842	0.557	0.484	0.030915	5	HIF1A	0.20267
1998	MA1106.1	2.83131e-06	-0.171247	0.45	0.494	0.00127975	2	HIF1A	-0.134586
1999	MA1107.1	1.3419e-41	-1.18424	0.13	0.469	6.06537e-39	7	KLF9	-1.85108
[truncated: 251 more rows]

## Sheet: HSC_chromVAR
	Row.names	V1	p_val	avg_logFC	pct.1	pct.2	p_val_adj	recalculated log2FC
1	MA0003.3	TFAP2A	0.0737465	0.194822	0.522	0.476	1	0.133088
2	MA0009.2	T	0.344428	-0.195545	0.446	0.497	1	-0.156202
3	MA0014.3	PAX5	0.00806916	-0.12992	0.424	0.53	1	-0.321928
4	MA0017.2	NR2F1	0.303112	0.0507435	0.535	0.503	1	0.0889805
5	MA0018.3	CREB1	0.00072708	0.294894	0.551	0.428	0.32864	0.364442
6	MA0024.3	E2F1	6.2387e-06	-0.43778	0.446	0.554	0.00281989	-0.312842
7	MA0025.1	NFIL3	0.758518	0.0323558	0.468	0.458	1	0.0311609
8	MA0027.2	EN1	1.23318e-05	-0.466893	0.411	0.56	0.00557399	-0.446288
9	MA0028.2	ELK1	0.0339594	-0.209598	0.453	0.467	1	-0.0439115
10	MA0030.1	FOXF2	0.163137	0.134202	0.503	0.464	1	0.116434
11	MA0031.1	FOXD1	0.0476385	0.210509	0.535	0.506	1	0.0804015
12	MA0032.2	FOXC1	0.00481673	-0.314731	0.446	0.548	1	-0.297132
13	MA0033.2	FOXL1	0.0427004	0.222511	0.525	0.509	1	0.0446518
14	MA0036.3	GATA2	1.5824e-10	1.50047	0.554	0.346	7.15245e-08	0.679114
15	MA0037.3	GATA3	6.31437e-09	1.58848	0.566	0.358	2.8541e-06	0.660842
16	MA0039.3	KLF4	0.0381499	0.241995	0.525	0.44	1	0.254814
17	MA0042.2	FOXI1	0.0427004	0.222511	0.525	0.509	1	0.0446518
18	MA0043.2	HLF	0.0711683	-0.237273	0.459	0.488	1	-0.088387
19	MA0046.2	HNF1A	0.637343	-0.124079	0.475	0.512	1	-0.108216
20	MA0048.2	NHLH1	4.05135e-05	0.316772	0.57	0.467	0.0183121	0.287539
21	MA0050.2	IRF1	2.1947e-06	-0.0807703	0.389	0.578	0.000992006	-0.571299
22	MA0051.1	IRF2	6.49425e-06	0.126736	0.396	0.575	0.0029354	-0.538062
23	MA0052.3	MEF2A	0.000346038	0.422605	0.519	0.401	0.156409	0.372132
24	MA0056.1	MZF1	3.74331e-11	0.345688	0.652	0.413	1.69198e-08	0.65873
25	MA0057.1	MZF1(var.2)	0.273774	-0.185824	0.456	0.512	1	-0.16711
26	MA0058.3	MAX	0.558634	0.0236016	0.456	0.497	1	-0.124212
27	MA0059.1	MAX::MYC	0.241337	-0.108098	0.491	0.536	1	-0.12651
28	MA0060.3	NFYA	3.59758e-22	-0.853982	0.329	0.639	1.6261e-19	-0.957728
29	MA0066.1	PPARG	0.00761123	0.240919	0.538	0.446	1	0.270562
30	MA0068.2	PAX4	0.133281	-0.138735	0.481	0.509	1	-0.0816288
31	MA0069.1	Pax6	0.108161	-0.1122	0.434	0.518	1	-0.255257
32	MA0070.1	PBX1	0.305671	-0.0208505	0.465	0.497	1	-0.0960151
33	MA0071.1	RORA	0.000773953	0.142688	0.551	0.464	0.349827	0.247928
34	MA0072.1	RORA(var.2)	0.244634	0.236081	0.509	0.479	1	0.08764
35	MA0073.1	RREB1	0.122779	0.206997	0.487	0.446	1	0.126878
36	MA0074.1	RXRA::VDR	0.631561	0.144735	0.509	0.452	1	0.171343
37	MA0076.2	ELK4	0.00277081	0.403965	0.509	0.407	1	0.322637
38	MA0077.1	SOX9	0.393655	0.0826786	0.519	0.467	1	0.152312
39	MA0079.3	SP1	2.88932e-22	-0.660525	0.285	0.521	1.30597e-19	-0.870321
40	MA0080.4	SPI1	4.1091e-12	1.80696	0.598	0.395	1.85731e-09	0.598293
41	MA0081.1	SPIB	4.87328e-23	1.12303	0.674	0.377	2.20272e-20	0.838184
42	MA0083.3	SRF	0.635585	0.0055883	0.516	0.497	1	0.0541252
43	MA0084.1	SRY	0.06012	-0.14852	0.487	0.524	1	-0.105645
44	MA0088.2	ZNF143	1.99637e-05	-0.403468	0.437	0.509	0.00902361	-0.220032
45	MA0090.2	TEAD1	0.0690705	0.0972838	0.503	0.479	1	0.0705327
46	MA0091.1	TAL1::TCF3	0.0339601	0.0792595	0.503	0.422	1	0.253315
47	MA0093.2	USF1	0.248251	-0.141609	0.494	0.488	1	0.0176299
48	MA0095.2	YY1	1.1067e-18	-0.880932	0.323	0.602	5.00227e-16	-0.898229
49	MA0098.3	ETS1	4.22717e-06	0.403076	0.528	0.386	0.00191068	0.451937
50	MA0099.3	FOS::JUN	6.60274e-66	7.64472	0.69	0.114	2.98444e-63	2.59756
51	MA0100.3	MYB	0.112539	0.165691	0.513	0.491	1	0.0632358
52	MA0101.1	REL	0.842427	0.0899059	0.468	0.47	1	-0.00615223
53	MA0102.3	CEBPA	0.0794376	0.317748	0.487	0.464	1	0.069797
54	MA0103.3	ZEB1	0.0616958	-0.135865	0.478	0.539	1	-0.173275
55	MA0104.4	MYCN	0.330569	0.00629769	0.481	0.497	1	-0.047209
56	MA0105.4	NFKB1	0.174215	0.796908	0.484	0.479	1	0.0149814
57	MA0106.3	TP53	0.922328	0.141856	0.481	0.497	1	-0.047209
58	MA0107.1	RELA	0.227462	0.675006	0.468	0.437	1	0.0988753
59	MA0112.3	ESR1	0.210362	0.195936	0.503	0.473	1	0.0887182
60	MA0113.3	NR3C1	0.851787	0.0729656	0.5	0.485	1	0.0439433
61	MA0115.1	NR1H2::RXRA	0.408714	-0.0682693	0.468	0.497	1	-0.0867373
62	MA0119.1	NFIC::TLX1	2.89461e-12	0.833516	0.585	0.355	1.30837e-09	0.720618
63	MA0122.2	NKX3-2	0.461626	0.0126676	0.506	0.458	1	0.14379
64	MA0130.1	ZNF354C	0.254704	-0.0696709	0.475	0.488	1	-0.0389536
65	MA0131.2	HINFP	0.00247048	-0.109747	0.43	0.545	1	-0.34192
66	MA0132.2	PDX1	0.0153009	-0.310493	0.449	0.527	1	-0.231088
67	MA0136.2	ELF5	1.32202e-13	0.598217	0.62	0.361	5.97553e-11	0.780269
68	MA0137.3	STAT1	0.838712	-0.0971734	0.468	0.494	1	-0.0780025
69	MA0138.2	REST	0.349891	0.123358	0.57	0.509	1	0.163296
70	MA0139.1	CTCF	2.28832e-69	-1.19131	0.19	0.798	1.03432e-66	-2.07039
71	MA0140.2	GATA1::TAL1	9.45735e-08	0.932735	0.551	0.358	4.27472e-05	0.622093
72	MA0141.3	ESRRB	0.871735	-0.12106	0.475	0.5	1	-0.0740006
73	MA0144.2	STAT3	0.112111	-0.0699617	0.459	0.5	1	-0.123434
74	MA0145.3	TFCP2	0.0278442	-0.124292	0.456	0.509	1	-0.158632
75	MA0147.3	MYC	0.564497	0.0393313	0.497	0.47	1	0.0805851
76	MA0148.3	FOXA1	0.680853	-0.0241582	0.513	0.503	1	0.0284004
77	MA0149.1	EWSR1-FLI1	2.47471e-09	0.477756	0.601	0.383	1.11857e-06	0.650021
78	MA0152.1	NFATC2	5.47374e-08	-0.44103	0.389	0.569	2.47413e-05	-0.548658
79	MA0153.2	HNF1B	0.185719	0.0425517	0.538	0.479	1	0.167581
80	MA0154.3	EBF1	0.755064	-0.0554332	0.475	0.539	1	-0.182358
81	MA0155.1	INSM1	0.00445194	0.227329	0.535	0.449	1	0.252823
82	MA0156.2	FEV	0.224258	0.0860113	0.468	0.446	1	0.0694648
83	MA0157.2	FOXO3	0.0277838	0.300261	0.547	0.485	1	0.173556
84	MA0158.1	HOXA5	0.303561	0.0209222	0.506	0.494	1	0.0346263
85	MA0159.1	RARA::RXRA	0.117134	0.0888004	0.554	0.497	1	0.15664
86	MA0160.1	NR4A2	0.764081	-0.0643419	0.519	0.476	1	0.124773
87	MA0161.2	NFIC	2.09371e-07	0.458431	0.563	0.419	9.46359e-05	0.426185
88	MA0162.3	EGR1	1.11629e-13	-0.577836	0.361	0.557	5.04565e-11	-0.625678
89	MA0163.1	PLAG1	0.98492	0.115683	0.503	0.476	1	0.0795968
90	MA0258.2	ESR2	1.88089e-06	0.181321	0.582	0.422	0.000850163	0.463776
91	MA0259.1	ARNT::HIF1A	0.524122	0.00462688	0.509	0.506	1	0.00852827
92	MA0442.2	SOX10	0.23347	-0.128905	0.532	0.497	1	0.0981804
93	MA0462.1	BATF::JUN	3.38278e-62	6.25054	0.684	0.148	1.52902e-59	2.2084
94	MA0464.2	BHLHE40	0.00112432	-0.895712	0.411	0.539	0.508192	-0.391147
95	MA0465.1	CDX2	0.643061	0.075886	0.491	0.494	1	-0.00878802
96	MA0466.2	CEBPB	0.593209	-0.16152	0.481	0.479	1	0.00601124
97	MA0468.1	DUX4	0.547448	-0.095049	0.494	0.503	1	-0.0260474
98	MA0469.2	E2F3	1.00364e-07	-0.498419	0.386	0.566	4.53647e-05	-0.552201
99	MA0470.1	E2F4	7.96163e-09	-0.358708	0.389	0.554	3.59866e-06	-0.510116
100	MA0471.1	E2F6	0.042623	-0.0899843	0.456	0.5	1	-0.132894
101	MA0472.2	EGR2	8.64942e-07	-0.303886	0.399	0.515	0.000390954	-0.368184
102	MA0473.2	ELF1	0.650109	-0.029188	0.487	0.422	1	0.206679
103	MA0474.2	ERG	6.05611e-08	0.441106	0.563	0.383	2.73736e-05	0.555791
104	MA0475.2	FLI1	0.00617552	0.186425	0.516	0.413	1	0.321229
105	MA0476.1	FOS	1.51385e-69	7.96741	0.703	0.099	6.84258e-67	2.82802
106	MA0477.1	FOSL1	8.25004e-74	8.00399	0.715	0.102	3.72902e-71	2.80937
107	MA0478.1	FOSL2	3.45034e-70	8.67944	0.706	0.108	1.55956e-67	2.70864
108	MA0479.1	FOXH1	0.372072	-0.163027	0.484	0.521	1	-0.106276
109	MA0481.2	FOXP1	0.0605791	0.0987558	0.551	0.494	1	0.157541
110	MA0484.1	HNF4G	0.920669	-0.00355482	0.516	0.503	1	0.0368127
111	MA0486.2	HSF1	0.411844	-0.0243484	0.446	0.5	1	-0.164884
112	MA0488.1	JUN	0.0396536	0.214892	0.487	0.431	1	0.176234
113	MA0489.1	JUN(var.2)	4.65776e-66	8.22286	0.699	0.105	2.10531e-63	2.7349
114	MA0490.1	JUNB	5.44961e-72	8.2817	0.706	0.093	2.46322e-69	2.92437
115	MA0491.1	JUND	1.70102e-70	7.7973	0.699	0.108	7.68862e-68	2.69426
116	MA0492.1	JUND(var.2)	0.244863	0.149927	0.506	0.443	1	0.191831
117	MA0495.2	MAFF	5.18333e-15	1.08123	0.611	0.352	2.34286e-12	0.795597
118	MA0496.2	MAFK	5.59902e-14	0.770831	0.617	0.367	2.53076e-11	0.74949
119	MA0497.1	MEF2C	0.545862	-0.0194159	0.487	0.491	1	-0.0118013
120	MA0498.2	MEIS1	0.00055859	0.220387	0.532	0.413	0.252483	0.365284
121	MA0501.1	MAF::NFE2	9.21109e-33	1.3624	0.68	0.268	4.16341e-30	1.3433
122	MA0502.1	NFYB	5.24469e-20	-0.852312	0.345	0.611	2.3706e-17	-0.824576
123	MA0504.1	NR2C2	0.994434	-0.0484479	0.513	0.491	1	0.0632358
124	MA0506.1	NRF1	6.26497e-33	-1.42626	0.269	0.605	2.83177e-30	-1.16933
125	MA0507.1	POU2F2	0.18225	-0.0986542	0.446	0.503	1	-0.173515
126	MA0508.2	PRDM1	0.32672	-0.127555	0.484	0.509	1	-0.0726586
127	MA0510.2	RFX5	7.6042e-06	-0.412349	0.405	0.569	0.0034371	-0.490507
128	MA0511.2	RUNX2	1.77558e-26	1.41031	0.63	0.253	8.02561e-24	1.31621
129	MA0513.1	SMAD2::SMAD3::SMAD4	5.94948e-19	0.885695	0.642	0.352	2.68916e-16	0.866998
130	MA0516.1	SP2	4.34626e-29	-0.757743	0.272	0.557	1.96451e-26	-1.03407
131	MA0517.1	STAT1::STAT2	0.00248148	0.406623	0.453	0.536	1	-0.242722
132	MA0522.2	TCF3	0.415264	-0.0772376	0.465	0.542	1	-0.221062
133	MA0523.1	TCF7L2	0.292901	-0.0530149	0.484	0.509	1	-0.0726586
134	MA0524.2	TFAP2C	0.163105	0.00533162	0.516	0.467	1	0.143949
135	MA0525.2	TP63	0.120871	-0.148446	0.449	0.512	1	-0.189428
136	MA0526.2	USF2	0.0125218	-0.299299	0.459	0.509	1	-0.149172
137	MA0527.1	ZBTB33	9.80744e-07	-0.446263	0.392	0.569	0.000443296	-0.537575
138	MA0528.1	ZNF263	0.909705	0.0141535	0.446	0.437	1	0.0294104
139	MA0593.1	FOXP2	0.0491421	0.285643	0.497	0.506	1	-0.0258915
140	MA0595.1	SREBF1	0.000456822	0.401608	0.57	0.473	0.206483	0.269122
141	MA0596.1	SREBF2	2.16963e-10	0.684696	0.592	0.401	9.80672e-08	0.561995
142	MA0597.1	THAP1	0.000474606	0.260783	0.544	0.47	0.214522	0.210946
143	MA0598.2	EHF	0.0768462	0.102677	0.525	0.44	1	0.254814
144	MA0599.1	KLF5	1.4816e-14	-0.598116	0.351	0.497	6.69683e-12	-0.501775
145	MA0600.2	RFX2	1.11004e-06	-0.625084	0.421	0.56	0.00050174	-0.411607
146	MA0610.1	DMRT3	0.88471	-0.0383656	0.503	0.479	1	0.0705327
147	MA0612.1	EMX1	0.146922	0.024097	0.453	0.542	1	-0.258782
148	MA0613.1	FOXG1	0.961848	-0.0670121	0.494	0.503	1	-0.0260474
149	MA0618.1	LBX1	0.109149	-0.257741	0.481	0.473	1	0.0241967
150	MA0620.2	MITF	0.00857632	-0.291388	0.456	0.509	1	-0.158632
151	MA0625.1	NFATC3	0.00307782	-0.322096	0.465	0.524	1	-0.172336
152	MA0628.1	POU6F1	0.218559	-0.0496123	0.453	0.5	1	-0.142417
153	MA0630.1	SHOX	0.206484	-0.223744	0.506	0.461	1	0.134371
154	MA0634.1	ALX3	0.0815434	-0.184519	0.453	0.521	1	-0.201772
155	MA0635.1	BARHL2	0.756679	-0.062451	0.475	0.47	1	0.0152668
156	MA0636.1	BHLHE41	0.00133615	-0.373192	0.44	0.506	0.60394	-0.201634
157	MA0637.1	CENPB	0.000333679	-0.441591	0.418	0.563	0.150823	-0.429632
158	MA0638.1	CREB3	0.2645	-0.112644	0.481	0.521	1	-0.115246
159	MA0639.1	DBP	0.0122836	-0.295431	0.468	0.5	1	-0.0954196
160	MA0640.1	ELF3	0.00411875	0.167764	0.554	0.434	1	0.352191
161	MA0641.1	ELF4	0.649707	0.126815	0.462	0.47	1	-0.0247679
162	MA0642.1	EN2	1.08314e-05	-0.374653	0.408	0.548	0.00489581	-0.425607
163	MA0644.1	ESX1	0.0590211	-0.145961	0.481	0.482	1	-0.00299625
164	MA0645.1	ETV6	5.99171e-15	0.831982	0.589	0.349	2.70825e-12	0.755041
165	MA0646.1	GCM1	0.428848	0.286761	0.513	0.5	1	0.0370307
166	MA0647.1	GRHL1	0.019357	-0.37121	0.472	0.539	1	-0.191498
167	MA0648.1	GSC	0.108424	0.247053	0.519	0.452	1	0.199412
168	MA0649.1	HEY2	0.343566	0.222485	0.503	0.47	1	0.0978976
169	MA0650.1	HOXA13	0.00657111	-0.300004	0.462	0.512	1	-0.148251
170	MA0651.1	HOXC11	0.94849	0.063904	0.494	0.485	1	0.0265263
171	MA0652.1	IRF8	2.17589e-08	0.125588	0.405	0.569	9.83501e-06	-0.490507
172	MA0653.1	IRF9	5.24775e-08	0.935511	0.392	0.581	2.37199e-05	-0.567685
173	MA0654.1	ISX	0.206484	-0.223744	0.506	0.461	1	0.134371
174	MA0655.1	JDP2	2.26016e-63	5.99369	0.677	0.151	1.02159e-60	2.16461
175	MA0656.1	JDP2(var.2)	0.859563	0.0447554	0.494	0.449	1	0.137796
176	MA0657.1	KLF13	2.46949e-14	-0.962428	0.332	0.521	1.11621e-11	-0.6501
177	MA0658.1	LHX6	0.00746268	-0.137914	0.424	0.53	1	-0.321928
178	MA0659.1	MAFG	6.1491e-06	0.420695	0.592	0.367	0.00277939	0.689817
179	MA0660.1	MEF2B	0.00120938	0.294947	0.551	0.452	0.546638	0.28573
180	MA0661.1	MEOX1	0.400434	0.0743766	0.468	0.5	1	-0.0954196
181	MA0662.1	MIXL1	0.0913737	0.00599576	0.459	0.506	1	-0.140643
182	MA0663.1	MLX	3.03695e-06	-0.539557	0.367	0.485	0.0013727	-0.402205
183	MA0664.1	MLXIPL	6.59747e-06	-0.493428	0.386	0.512	0.00298206	-0.407543
184	MA0665.1	MSC	0.0228215	0.261219	0.516	0.443	1	0.220064
185	MA0666.1	MSX1	8.51145e-06	-0.409432	0.402	0.53	0.00384718	-0.398797
186	MA0667.1	MYF6	0.011264	0.159823	0.535	0.407	1	0.39451
187	MA0668.1	NEUROD2	0.00335256	0.277205	0.538	0.431	1	0.319918
188	MA0669.1	NEUROG2	0.0140511	0.270218	0.522	0.446	1	0.227006
189	MA0670.1	NFIA	0.000180378	0.488001	0.576	0.452	0.0815309	0.349746
190	MA0671.1	NFIX	5.49874e-06	0.360656	0.563	0.407	0.00248543	0.468106
191	MA0672.1	NKX2-3	0.321879	0.130375	0.535	0.461	1	0.214772
192	MA0673.1	NKX2-8	0.0158754	0.212488	0.528	0.437	1	0.272905
193	MA0674.1	NKX6-1	0.278306	-0.0344005	0.468	0.5	1	-0.0954196
194	MA0675.1	NKX6-2	0.38545	-0.147477	0.491	0.509	1	-0.0519426
195	MA0678.1	OLIG2	0.16926	0.230589	0.497	0.47	1	0.0805851
196	MA0679.1	ONECUT1	0.00287684	-0.305048	0.453	0.536	1	-0.242722
197	MA0680.1	PAX7	0.00498949	-0.289884	0.453	0.53	1	-0.226481
198	MA0683.1	POU4F2	0.985673	0.0671721	0.5	0.47	1	0.0892673
199	MA0684.1	RUNX3	1.25286e-21	1.16646	0.633	0.334	5.66292e-19	0.922357
200	MA0685.1	SP4	4.24815e-33	-1.1485	0.272	0.545	1.92016e-30	-1.00265
201	MA0686.1	SPDEF	0.700958	-0.16424	0.478	0.485	1	-0.0209741
202	MA0687.1	SPIC	7.77647e-14	1.16627	0.592	0.364	3.51497e-11	0.701659
203	MA0688.1	TBX2	0.757463	-0.0115577	0.478	0.512	1	-0.0991332
204	MA0689.1	TBX20	0.6975	0.0411911	0.503	0.491	1	0.0348354
205	MA0690.1	TBX21	0.6708	0.0707611	0.487	0.497	1	-0.0293241
206	MA0691.1	TFAP4	8.69969e-05	0.301135	0.547	0.398	0.0393226	0.458772
207	MA0692.1	TFEB	0.0826258	-0.283223	0.459	0.437	1	0.0708609
208	MA0693.2	VDR	0.00176251	-0.287481	0.465	0.554	0.796653	-0.252655
209	MA0694.1	ZBTB7B	0.38648	0.0541096	0.478	0.467	1	0.0335881
210	MA0695.1	ZBTB7C	0.412207	0.114779	0.478	0.491	1	-0.0387124
211	MA0696.1	ZIC1	0.00464575	-0.238666	0.424	0.572	1	-0.431951
212	MA0697.1	ZIC3	0.000193984	-0.266211	0.44	0.551	0.0876806	-0.324549
213	MA0698.1	ZBTB18	0.000166403	0.401608	0.535	0.425	0.0752139	0.332076
214	MA0699.1	LBX2	0.000346368	-0.318714	0.424	0.509	0.156558	-0.263601
215	MA0700.1	LHX2	0.0143844	-0.118546	0.427	0.518	1	-0.278716
216	MA0701.1	LHX9	0.00305246	-0.328075	0.44	0.503	1	-0.193055
217	MA0702.1	LMX1A	0.435511	0.0633881	0.481	0.491	1	-0.0296861
218	MA0703.1	LMX1B	0.335599	0.0210459	0.462	0.491	1	-0.0878302
219	MA0706.1	MEOX2	0.87207	0.0776646	0.509	0.509	1	0
220	MA0707.1	MNX1	0.510075	-0.000711231	0.478	0.479	1	-0.00301504
221	MA0708.1	MSX2	1.74157e-05	-0.402729	0.424	0.557	0.00787189	-0.393613
222	MA0710.1	NOTO	0.82282	0.0419972	0.468	0.494	1	-0.0780025
223	MA0711.1	OTX1	0.0675538	-0.0631569	0.462	0.542	1	-0.2304
224	MA0712.1	OTX2	1.05492e-06	-0.371482	0.44	0.578	0.000476826	-0.393566
225	MA0713.1	PHOX2A	0.0375736	-0.195624	0.462	0.53	1	-0.1981
226	MA0714.1	PITX3	1.39519e-07	-0.440166	0.402	0.557	6.30624e-05	-0.470482
227	MA0715.1	PROP1	0.103513	-0.0977481	0.462	0.479	1	-0.0521328
228	MA0716.1	PRRX1	0.643703	-0.137106	0.5	0.461	1	0.117161
229	MA0717.1	RAX2	0.206484	-0.223744	0.506	0.461	1	0.134371
230	MA0718.1	RAX	0.0103804	-0.246174	0.462	0.506	1	-0.131245
231	MA0719.1	RHOXF1	2.25264e-06	-0.375013	0.415	0.563	0.00101819	-0.440024
232	MA0721.1	UNCX	0.643703	-0.137106	0.5	0.461	1	0.117161
233	MA0722.1	VAX1	0.00542458	-0.265793	0.44	0.569	1	-0.370925
234	MA0723.1	VAX2	0.00542458	-0.265793	0.44	0.569	1	-0.370925
235	MA0724.1	VENTX	0.0722607	-0.00663111	0.456	0.473	1	-0.0528064
236	MA0725.1	VSX1	0.00247589	-0.262487	0.437	0.53	1	-0.278359
237	MA0726.1	VSX2	0.00247589	-0.262487	0.437	0.53	1	-0.278359
238	MA0727.1	NR3C2	0.795984	0.120079	0.532	0.524	1	0.0218594
239	MA0729.1	RARA	0.578438	0.0109375	0.487	0.515	1	-0.0806507
240	MA0730.1	RARA(var.2)	0.0145438	0.260861	0.554	0.461	1	0.265119
241	MA0731.1	BCL6B	0.463417	-0.0506724	0.484	0.491	1	-0.020716
242	MA0732.1	EGR3	2.16492e-10	-0.403539	0.361	0.533	9.78545e-08	-0.562137
243	MA0733.1	EGR4	1.29794e-07	-0.476433	0.37	0.497	5.8667e-05	-0.425721
244	MA0734.1	GLI2	0.000532941	0.357517	0.544	0.452	0.240889	0.267284
245	MA0735.1	GLIS1	0.137834	-0.101339	0.468	0.503	1	-0.10405
246	MA0736.1	GLIS2	0.672653	-0.0295222	0.478	0.506	1	-0.0821268
247	MA0737.1	GLIS3	0.299448	0.0476807	0.503	0.464	1	0.116434
248	MA0738.1	HIC2	0.011368	0.169512	0.541	0.485	1	0.157644
249	MA0740.1	KLF14	2.73284e-35	-1.19523	0.269	0.542	1.23524e-32	-1.01069
250	MA0741.1	KLF16	3.49662e-19	-0.62174	0.316	0.5	1.58047e-16	-0.662004
251	MA0743.1	SCRT1	0.161959	-0.118797	0.453	0.509	1	-0.168155
252	MA0744.1	SCRT2	0.911415	-0.0197857	0.503	0.476	1	0.0795968
253	MA0745.1	SNAI2	0.374707	0.0329481	0.478	0.554	1	-0.212875
254	MA0746.1	SP3	9.16071e-16	-0.669086	0.335	0.518	4.14064e-13	-0.628791
255	MA0747.1	SP8	5.18191e-16	-0.882016	0.342	0.476	2.34222e-13	-0.476965
256	MA0748.1	YY2	3.2527e-09	-0.441502	0.383	0.569	1.47022e-06	-0.571084
257	MA0749.1	ZBED1	0.341746	-0.110045	0.478	0.488	1	-0.0298705
258	MA0750.2	ZBTB7A	0.000368767	0.554729	0.5	0.383	0.166683	0.384584
259	MA0751.1	ZIC4	6.02171e-05	-0.376521	0.462	0.566	0.0272181	-0.292909
260	MA0752.1	ZNF410	0.101861	-0.223133	0.468	0.5	1	-0.0954196
261	MA0753.1	ZNF740	0.0874166	-0.254274	0.487	0.506	1	-0.0552156
262	MA0754.1	CUX1	0.416068	-0.129331	0.484	0.524	1	-0.11456
263	MA0755.1	CUX2	0.0518949	-0.365198	0.434	0.527	1	-0.280108
264	MA0756.1	ONECUT2	0.0246965	-0.241228	0.456	0.545	1	-0.257222
265	MA0757.1	ONECUT3	0.000557729	-0.315051	0.437	0.581	0.252093	-0.410905
266	MA0758.1	E2F7	1.16771e-08	-0.489328	0.392	0.569	5.27807e-06	-0.537575
267	MA0759.1	ELK3	0.553212	0.107221	0.475	0.455	1	0.062061
268	MA0760.1	ERF	1.44505e-13	0.649909	0.601	0.358	6.53163e-11	0.747405
269	MA0761.1	ETV1	0.311094	-0.0992514	0.459	0.458	1	0.00314656
270	MA0762.1	ETV2	1.27819e-16	0.690738	0.601	0.352	5.77742e-14	0.77179
271	MA0763.1	ETV3	0.67995	-0.05787	0.472	0.449	1	0.0720714
272	MA0764.1	ETV4	0.388028	-0.13273	0.443	0.458	1	-0.0480409
273	MA0765.1	ETV5	0.0113703	-0.278198	0.396	0.467	1	-0.237922
274	MA0766.1	GATA5	9.43082e-08	0.956878	0.56	0.383	4.26273e-05	0.548082
275	MA0767.1	GCM2	0.452322	-0.145067	0.509	0.503	1	0.0171073
276	MA0768.1	LEF1	0.590564	-0.0452126	0.516	0.47	1	0.13471
277	MA0770.1	HSF2	0.839345	0.102777	0.43	0.488	1	-0.182544
278	MA0771.1	HSF4	0.50835	-0.0183522	0.484	0.5	1	-0.046921
279	MA0772.1	IRF7	1.66165e-10	-0.286316	0.399	0.608	7.51065e-08	-0.607683
280	MA0773.1	MEF2D	0.00500921	0.285245	0.557	0.467	1	0.254255
281	MA0774.1	MEIS2	0.0121277	0.267145	0.541	0.461	1	0.230862
282	MA0775.1	MEIS3	4.83475e-05	0.168306	0.547	0.404	0.0218531	0.437186
283	MA0776.1	MYBL1	0.0724222	-0.247234	0.462	0.506	1	-0.131245
284	MA0777.1	MYBL2	0.040682	-0.407117	0.449	0.494	1	-0.137796
285	MA0778.1	NFKB2	0.844261	0.761648	0.5	0.5	1	0
286	MA0779.1	PAX1	0.0595229	0.185843	0.491	0.44	1	0.15822
287	MA0780.1	PAX3	0.000347779	-0.399742	0.411	0.527	0.157196	-0.358665
288	MA0781.1	PAX9	0.243766	0.0673553	0.516	0.461	1	0.162604
289	MA0782.1	PKNOX1	1.02719e-07	0.391776	0.582	0.413	4.6429e-05	0.494877
290	MA0783.1	PKNOX2	1.02449e-09	0.601108	0.566	0.413	4.6307e-07	0.45466
291	MA0784.1	POU1F1	0.352124	-0.107234	0.484	0.491	1	-0.020716
292	MA0785.1	POU2F1	0.405085	-0.123132	0.494	0.503	1	-0.0260474
293	MA0786.1	POU3F1	0.968076	0.05935	0.491	0.512	1	-0.0604208
294	MA0787.1	POU3F2	0.548774	-0.0187495	0.478	0.509	1	-0.090655
295	MA0788.1	POU3F3	0.28113	-0.170768	0.456	0.491	1	-0.106689
296	MA0789.1	POU3F4	0.626736	-0.27643	0.5	0.494	1	0.0174171
297	MA0790.1	POU4F1	0.919939	0.0178911	0.5	0.488	1	0.0350469
298	MA0791.1	POU4F3	0.742637	-0.022526	0.478	0.503	1	-0.0735478
299	MA0792.1	POU5F1B	0.767659	-0.0436117	0.516	0.479	1	0.107345
300	MA0793.1	POU6F2	0.89503	0.176357	0.449	0.494	1	-0.137796
301	MA0794.1	PROX1	0.487379	-0.0566252	0.491	0.497	1	-0.0175228
302	MA0795.1	SMAD3	5.83907e-28	1.39356	0.633	0.28	2.63926e-25	1.17678
303	MA0796.1	TGIF1	3.25688e-07	0.383935	0.56	0.386	0.000147211	0.536826
304	MA0797.1	TGIF2	3.31664e-09	0.359683	0.595	0.392	1.49912e-06	0.602036
305	MA0798.1	RFX3	4.15571e-06	-0.621322	0.44	0.575	0.00187838	-0.386058
306	MA0799.1	RFX4	2.39493e-06	-0.745554	0.399	0.554	0.00108251	-0.473497
307	MA0800.1	EOMES	0.832928	0.0633048	0.497	0.524	1	-0.076321
308	MA0801.1	MGA	0.00430464	0.243202	0.538	0.479	1	0.167581
309	MA0802.1	TBR1	0.669716	0.0439833	0.494	0.491	1	0.00878802
310	MA0803.1	TBX15	0.0700364	0.143451	0.509	0.5	1	0.0257376
311	MA0804.1	TBX19	0.752976	0.119748	0.484	0.479	1	0.0149814
312	MA0805.1	TBX1	0.00430464	0.243202	0.538	0.479	1	0.167581
313	MA0806.1	TBX4	0.755367	-0.147916	0.481	0.494	1	-0.0384741
314	MA0807.1	TBX5	0.755367	-0.147916	0.481	0.494	1	-0.0384741
315	MA0808.1	TEAD3	0.848711	0.0731955	0.468	0.515	1	-0.138064
316	MA0809.1	TEAD4	0.435812	0.2642	0.484	0.497	1	-0.0382388
317	MA0810.1	TFAP2A(var.2)	0.213084	0.0323283	0.528	0.47	1	0.167877
318	MA0811.1	TFAP2B	0.210144	0.0366513	0.538	0.479	1	0.167581
319	MA0812.1	TFAP2B(var.2)	0.00323283	0.253644	0.557	0.464	1	0.263553
320	MA0813.1	TFAP2B(var.3)	0.990015	-0.0472522	0.494	0.491	1	0.00878802
321	MA0814.1	TFAP2C(var.2)	0.00270682	0.206323	0.566	0.461	1	0.296035
322	MA0815.1	TFAP2C(var.3)	0.568953	-0.0615695	0.528	0.485	1	0.122553
323	MA0817.1	BHLHE23	0.0114828	0.263074	0.525	0.458	1	0.19697
324	MA0818.1	BHLHE22	0.0105021	0.328444	0.525	0.452	1	0.215995
325	MA0819.1	CLOCK	0.13441	-0.187568	0.446	0.5	1	-0.164884
326	MA0820.1	FIGLA	0.0199534	-0.124276	0.462	0.518	1	-0.165059
327	MA0821.1	HES5	0.027905	0.0955292	0.525	0.446	1	0.235274
328	MA0822.1	HES7	0.265631	0.0365581	0.494	0.47	1	0.0718503
329	MA0823.1	HEY1	0.408904	0.118485	0.494	0.482	1	0.0354779
330	MA0824.1	ID4	0.813202	0.0743112	0.5	0.482	1	0.0528949
331	MA0825.1	MNT	0.277701	-0.0557614	0.494	0.512	1	-0.0516328
332	MA0826.1	OLIG1	0.0109487	0.300932	0.544	0.449	1	0.276891
333	MA0827.1	OLIG3	0.0582316	0.266001	0.522	0.47	1	0.151389
334	MA0828.1	SREBF2(var.2)	0.00141622	-0.252376	0.434	0.512	0.64013	-0.238449
335	MA0830.1	TCF4	0.540467	-0.0787227	0.509	0.521	1	-0.0336177
336	MA0831.2	TFE3	0.243776	-0.0809405	0.462	0.464	1	-0.00623195
337	MA0833.1	ATF4	0.0318008	0.371578	0.5	0.446	1	0.164884
338	MA0834.1	ATF7	0.0685283	-0.272821	0.478	0.512	1	-0.0991332
339	MA0835.1	BATF3	0.459544	-0.071247	0.472	0.482	1	-0.0302463
340	MA0836.1	CEBPD	0.309113	-0.215935	0.453	0.494	1	-0.125
341	MA0837.1	CEBPE	0.54423	-0.216032	0.5	0.476	1	0.0709665
342	MA0838.1	CEBPG	0.66764	0.0302524	0.487	0.497	1	-0.0293241
343	MA0839.1	CREB3L1	0.39965	0.0612021	0.506	0.485	1	0.0611526
344	MA0841.1	NFE2	1.26866e-59	5.53062	0.674	0.133	5.73435e-57	2.34132
345	MA0842.1	NRL	5.51771e-08	0.501469	0.554	0.389	2.49401e-05	0.510116
346	MA0843.1	TEF	0.398606	-0.299314	0.478	0.494	1	-0.0475004
347	MA0844.1	XBP1	0.110132	0.103676	0.528	0.449	1	0.233822
348	MA0845.1	FOXB1	0.714792	0.0112339	0.497	0.485	1	0.0352611
349	MA0846.1	FOXC2	0.0707032	-0.184053	0.487	0.524	1	-0.105645
350	MA0847.1	FOXD2	0.0427004	0.222511	0.525	0.509	1	0.0446518
351	MA0848.1	FOXO4	0.0427004	0.222511	0.525	0.509	1	0.0446518
352	MA0849.1	FOXO6	0.0427004	0.222511	0.525	0.509	1	0.0446518
353	MA0850.1	FOXP3	0.0427004	0.222511	0.525	0.509	1	0.0446518
354	MA0852.2	FOXK1	0.239951	0.200655	0.481	0.497	1	-0.047209
355	MA0855.1	RXRB	0.385933	0.0893654	0.503	0.482	1	0.0615253
356	MA0856.1	RXRG	0.808186	-0.0574366	0.478	0.497	1	-0.0562352
357	MA0861.1	TP73	0.947453	0.0994144	0.459	0.518	1	-0.174458
358	MA0862.1	GMEB2	0.0217439	-0.105462	0.446	0.521	1	-0.22424
359	MA0863.1	MTF1	0.026279	0.237394	0.535	0.458	1	0.224191
360	MA0864.1	E2F2	4.98425e-06	-0.203682	0.449	0.542	0.00225288	-0.271577
361	MA0865.1	E2F8	0.00515139	-0.248364	0.446	0.533	1	-0.257092
362	MA0866.1	SOX21	0.111693	-0.174301	0.449	0.527	1	-0.231088
363	MA0867.1	SOX4	0.0368764	-0.0719955	0.446	0.527	1	-0.240759
364	MA0868.1	SOX8	0.551363	-0.15783	0.491	0.515	1	-0.0688494
365	MA0871.1	TFEC	0.00914912	-0.274638	0.453	0.494	1	-0.125
366	MA0872.1	TFAP2A(var.3)	0.695332	-0.0755571	0.519	0.491	1	0.0800115
367	MA0873.1	HOXD12	0.433613	0.116597	0.506	0.488	1	0.0522562
368	MA0875.1	BARX1	0.00105945	-0.291329	0.437	0.53	0.478871	-0.278359
369	MA0876.1	BSX	1.74157e-05	-0.402729	0.424	0.557	0.00787189	-0.393613
370	MA0878.1	CDX1	0.0528439	-0.119921	0.465	0.506	1	-0.121907
371	MA0882.1	DLX6	0.0137251	-0.263225	0.462	0.515	1	-0.15668
372	MA0884.1	DUXA	0.651262	-0.143073	0.487	0.461	1	0.079155
373	MA0886.1	EMX2	0.108649	-0.041819	0.453	0.491	1	-0.116212
374	MA0887.1	EVX1	0.336183	0.0138186	0.491	0.467	1	0.0723005
375	MA0888.1	EVX2	0.0420521	-0.158898	0.481	0.494	1	-0.0384741
376	MA0889.1	GBX1	7.23973e-06	-0.414585	0.399	0.548	0.00327236	-0.457787
377	MA0890.1	GBX2	0.000136401	-0.400047	0.44	0.554	0.0616531	-0.332382
378	MA0891.1	GSC2	0.288708	0.192229	0.522	0.479	1	0.124024
379	MA0892.1	GSX1	0.63647	-0.0191941	0.522	0.455	1	0.198183
380	MA0893.1	GSX2	0.210181	-0.069547	0.462	0.494	1	-0.0966182
381	MA0894.1	HESX1	1.1773e-05	-0.457414	0.427	0.56	0.00532139	-0.391191
382	MA0895.1	HMBOX1	0.0471921	-0.193831	0.491	0.518	1	-0.0772291
383	MA0899.1	HOXA10	0.0155629	-0.167028	0.462	0.533	1	-0.206243
384	MA0900.1	HOXA2	0.427915	0.00156926	0.475	0.491	1	-0.0477955
385	MA0901.1	HOXB13	0.0129854	-0.262616	0.434	0.527	1	-0.280108
386	MA0902.1	HOXB2	0.021483	-0.162633	0.459	0.5	1	-0.123434
387	MA0903.1	HOXB3	0.42046	-0.526647	0.503	0.503	1	0
388	MA0905.1	HOXC10	0.889408	-0.100152	0.478	0.488	1	-0.0298705
389	MA0906.1	HOXC12	0.116137	-0.0858916	0.462	0.521	1	-0.173391
390	MA0907.1	HOXC13	0.962304	0.109576	0.478	0.482	1	-0.0120225
391	MA0908.1	HOXD11	0.377736	-0.0947654	0.453	0.482	1	-0.0895221
392	MA0909.1	HOXD13	0.088423	-0.024901	0.459	0.497	1	-0.114752
393	MA0914.1	ISL2	0.374674	0.0232161	0.516	0.482	1	0.0983379
394	MA1100.1	ASCL1	0.00222511	0.344313	0.563	0.458	1	0.297787
395	MA1101.1	BACH2	2.90978e-53	3.78133	0.703	0.196	1.31522e-50	1.84267
396	MA1102.1	CTCFL	7.9273e-55	-2.15422	0.225	0.75	3.58314e-52	-1.73697
397	MA1103.1	FOXK2	0.133194	0.123984	0.528	0.488	1	0.113657
398	MA1104.1	GATA6	1.70919e-09	1.46293	0.544	0.37	7.72553e-07	0.556081
399	MA1105.1	GRHL2	0.0823896	-0.121996	0.484	0.518	1	-0.0979451
400	MA1106.1	HIF1A	0.666961	0.1049	0.5	0.515	1	-0.0426443
401	MA1107.1	KLF9	0.36034	-0.0551091	0.472	0.437	1	0.111154
402	MA1108.1	MXI1	0.813105	0.109681	0.5	0.47	1	0.0892673
403	MA1109.1	NEUROD1	0.04262	0.178369	0.494	0.491	1	0.00878802
404	MA1110.1	NR1H4	0.0193814	0.330197	0.519	0.437	1	0.248101
405	MA1111.1	NR2F2	0.860165	-0.13716	0.494	0.479	1	0.0444854
406	MA1112.1	NR4A1	0.284218	-0.127393	0.456	0.515	1	-0.175539
407	MA1113.1	PBX2	0.562514	0.124644	0.506	0.47	1	0.106477
408	MA1114.1	PBX3	3.08553e-12	0.656418	0.642	0.34	1.39466e-09	0.917039
409	MA1115.1	POU5F1	0.625399	0.112033	0.475	0.488	1	-0.0389536
410	MA1116.1	RBPJ	0.460696	0.0788652	0.5	0.473	1	0.0800879
411	MA1117.1	RELB	0.686816	0.00824196	0.5	0.485	1	0.0439433
412	MA1118.1	SIX1	0.660372	-0.0780832	0.459	0.515	1	-0.166078
413	MA1119.1	SIX2	0.0561641	0.0172285	0.56	0.446	1	0.328383
414	MA1120.1	SOX13	0.85219	0.11288	0.494	0.503	1	-0.0260474
415	MA1121.1	TEAD2	0.110946	0.283519	0.484	0.461	1	0.0702403
416	MA1122.1	TFDP1	8.69696e-08	-0.379942	0.386	0.518	3.93102e-05	-0.424351
417	MA1123.1	TWIST1	0.00082791	0.18888	0.57	0.434	0.374215	0.393267
418	MA1124.1	ZNF24	0.423821	0.123529	0.497	0.446	1	0.156202
419	MA1125.1	ZNF384	2.17044e-10	-0.993102	0.358	0.515	9.81039e-08	-0.524613
420	MA1126.1	FOS::JUN(var.2)	0.231493	-0.145852	0.459	0.464	1	-0.0156307
421	MA1127.1	FOSB::JUN	0.133749	-0.344153	0.487	0.494	1	-0.0205893
422	MA1128.1	FOSL1::JUN	1.0887e-68	7.80926	0.69	0.114	4.92093e-66	2.59756
423	MA1129.1	FOSL1::JUN(var.2)	0.0678503	-0.166922	0.494	0.488	1	0.0176299
424	MA1130.1	FOSL2::JUN	4.34995e-70	8.35552	0.709	0.108	1.96618e-67	2.71475
425	MA1131.1	FOSL2::JUN(var.2)	0.938482	-0.0472518	0.503	0.464	1	0.116434
426	MA1132.1	JUN::JUNB	1.04475e-58	5.18151	0.671	0.133	4.72228e-56	2.33489
427	MA1133.1	JUN::JUNB(var.2)	0.175607	-0.20139	0.497	0.482	1	0.0442127
428	MA1134.1	FOS::JUNB	2.18573e-69	7.51716	0.696	0.108	9.87952e-67	2.68806
429	MA1135.1	FOSB::JUNB	2.29213e-66	7.47678	0.687	0.102	1.03604e-63	2.75174
430	MA1136.1	FOSB::JUNB(var.2)	0.409049	0.0342782	0.459	0.5	1	-0.123434
431	MA1137.1	FOSL1::JUNB	6.46719e-70	7.8691	0.699	0.096	2.92317e-67	2.86419
432	MA1138.1	FOSL2::JUNB	7.55688e-67	7.58357	0.68	0.105	3.41571e-64	2.69515
433	MA1139.1	FOSL2::JUNB(var.2)	0.0493198	-0.155922	0.462	0.494	1	-0.0966182
434	MA1140.1	JUNB(var.2)	0.148984	-0.308231	0.472	0.515	1	-0.125786
435	MA1141.1	FOS::JUND	7.79347e-71	7.71547	0.703	0.105	3.52265e-68	2.74314
436	MA1142.1	FOSL1::JUND	1.00382e-67	6.94283	0.684	0.111	4.53727e-65	2.62344
437	MA1143.1	FOSL1::JUND(var.2)	0.0307991	-0.318341	0.44	0.509	1	-0.210162
438	MA1144.1	FOSL2::JUND	2.90802e-67	7.83462	0.677	0.123	1.31443e-64	2.4605
439	MA1145.1	FOSL2::JUND(var.2)	0.671361	-0.191565	0.468	0.485	1	-0.0514762
440	MA1146.1	NR1A4::RXRA	0.720765	-0.00755679	0.503	0.5	1	0.00863031
441	MA1147.1	NR4A2::RXRA	0.323584	-0.216287	0.497	0.488	1	0.0263647
442	MA1148.1	PPARA::RXRA	0.201299	0.1329	0.516	0.506	1	0.0282337
443	MA1149.1	RARA::RXRG	0.382809	0.0264682	0.525	0.494	1	0.0878064
444	MA1150.1	RORB	0.000908451	0.332868	0.532	0.437	0.41062	0.283793
445	MA1151.1	RORC	0.358101	0.262555	0.494	0.476	1	0.0535495
446	MA1152.1	SOX15	0.60329	-0.012516	0.478	0.479	1	-0.00301504
447	MA1154.1	ZNF282	0.329044	-0.0871115	0.525	0.482	1	0.123284
448	MA1155.1	ZSCAN4	0.29292	-0.0139516	0.513	0.464	1	0.144834
449	MA1418.1	IRF3	0.000151884	-0.0823049	0.408	0.563	0.0686517	-0.464566
450	MA1419.1	IRF4	7.36163e-10	-0.116326	0.396	0.605	3.32746e-07	-0.611435
451	MA1420.1	IRF5	0.00162798	-0.0102336	0.453	0.518	0.735848	-0.193441
452	MA1421.1	TCF7L1	0.82404	0.0761083	0.5	0.482	1	0.0528949
